# Supplementary material for: A comprehensive and comparative phenotypic analysis of the collaborative founder strains identifies new and known phenotypes
Source: PubMed Central journal article supplement (PMC7060152; doi:10.1007/s00335-020-09827-3), 2020-02-14

# Figure S2

## GMC01

### Color Key and Histogram

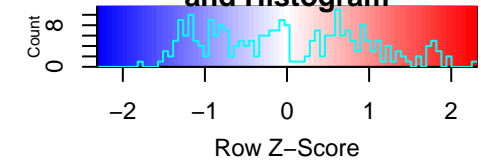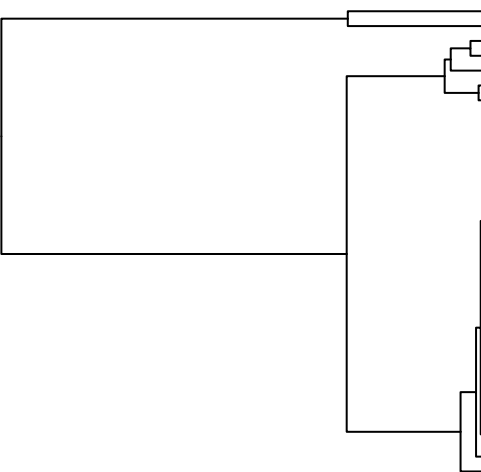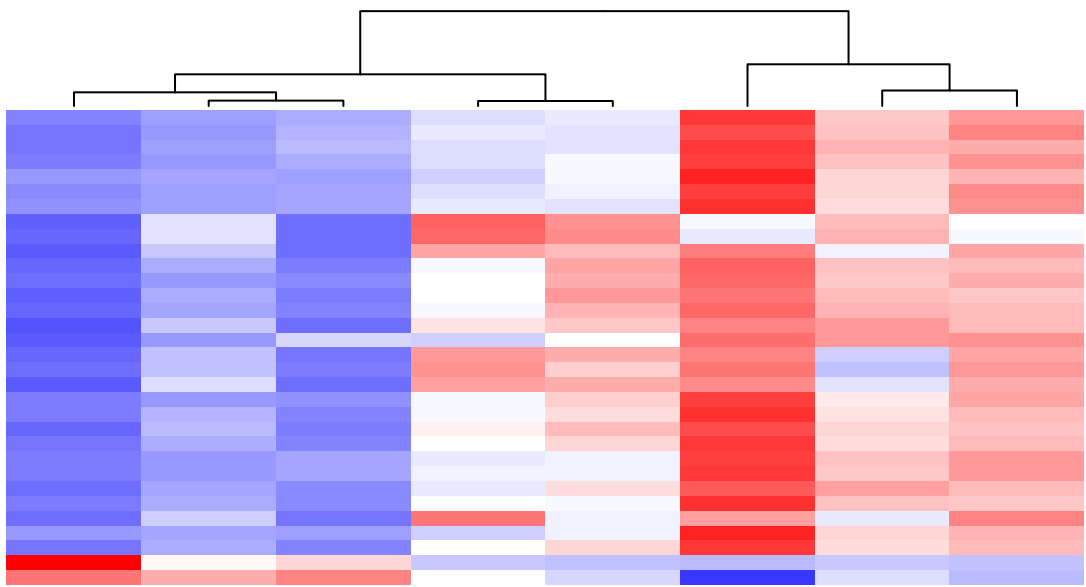

- distance\_total
- periphery\_distance
- distance\_1
- distance\_2
- center\_distance
- distance\_3
- distance\_4
- whole\_rest
- periphery\_rest
- rears\_total
- center\_distance\_3
- center\_distance\_4
- center\_distance\_2
- center\_distance\_total
- rears\_1
- center\_speed
- rears\_3
- rears\_4
- rears\_2
- center\_time\_4
- center\_time\_3
- center\_time\_2
- center\_time\_total
- whole\_speed
- periphery\_speed
- center\_distance\_1
- center\_time\_1
- center\_rest
- center\_entries
- center\_permanence
- center\_latency
- periphery\_permanence

A/J  
NZO/HILtJ  
129S1/SvImJ  
PWK/PhJ  
CAST/EiJ  
NOD/ShiLtJ  
WSB/EiJ  
C57BL/6J



# Color Key and Histogram

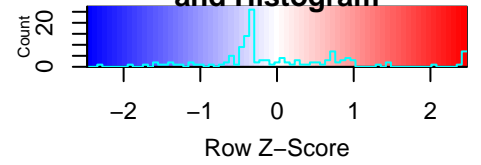

# GMC03

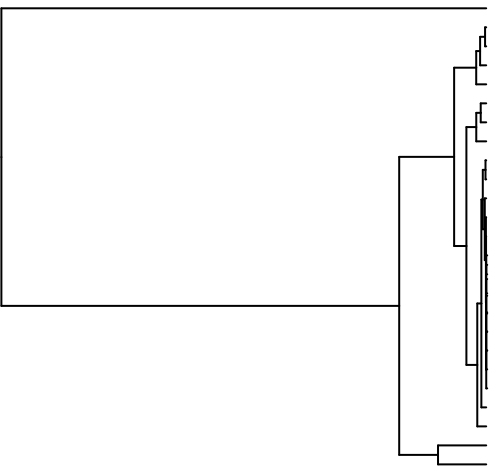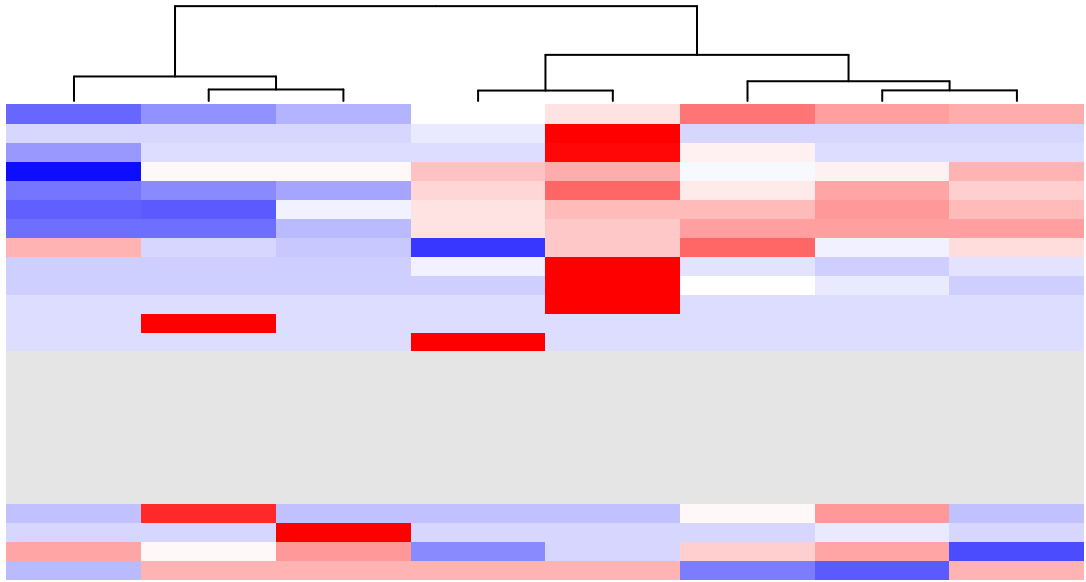

- loco\_activity
- touch\_escape
- body\_pos
- startle\_response
- transfer\_arousal
- tail\_elev
- pelvic\_elev
- urinate
- bite\_evidence
- vocalization
- defecation
- tremor
- gait
- lacrimation
- cornea\_reflex
- limb\_grasping
- palebral\_closure
- pinna\_reflex
- pos\_pass
- righting\_reflex
- trunk\_curl
- coat\_app
- whiskers
- num\_mice\_per\_cage
- deafness

- A/J
- NZO/HILtJ
- 129S1/SvImJ
- PWK/PhJ
- WSB/EiJ
- NOD/ShiLtJ
- C57BL/6J
- CAST/EiJ

### Color Key and Histogram

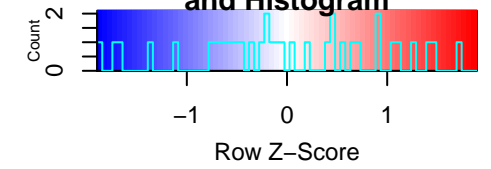

# GMC04

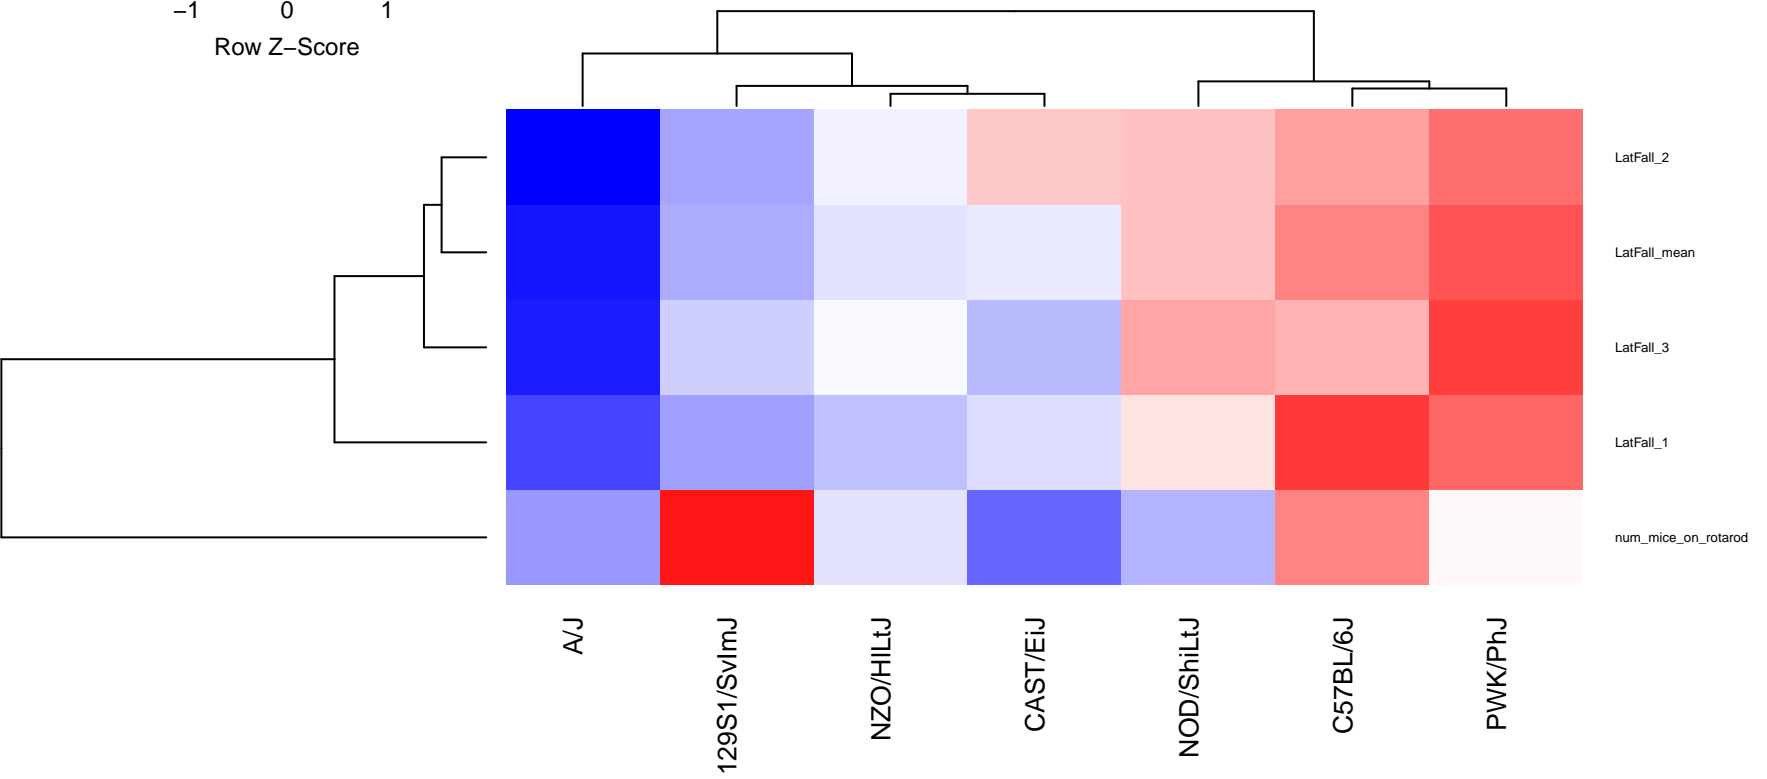

# Color Key and Histogram

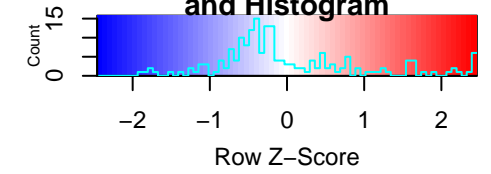

# GMC05

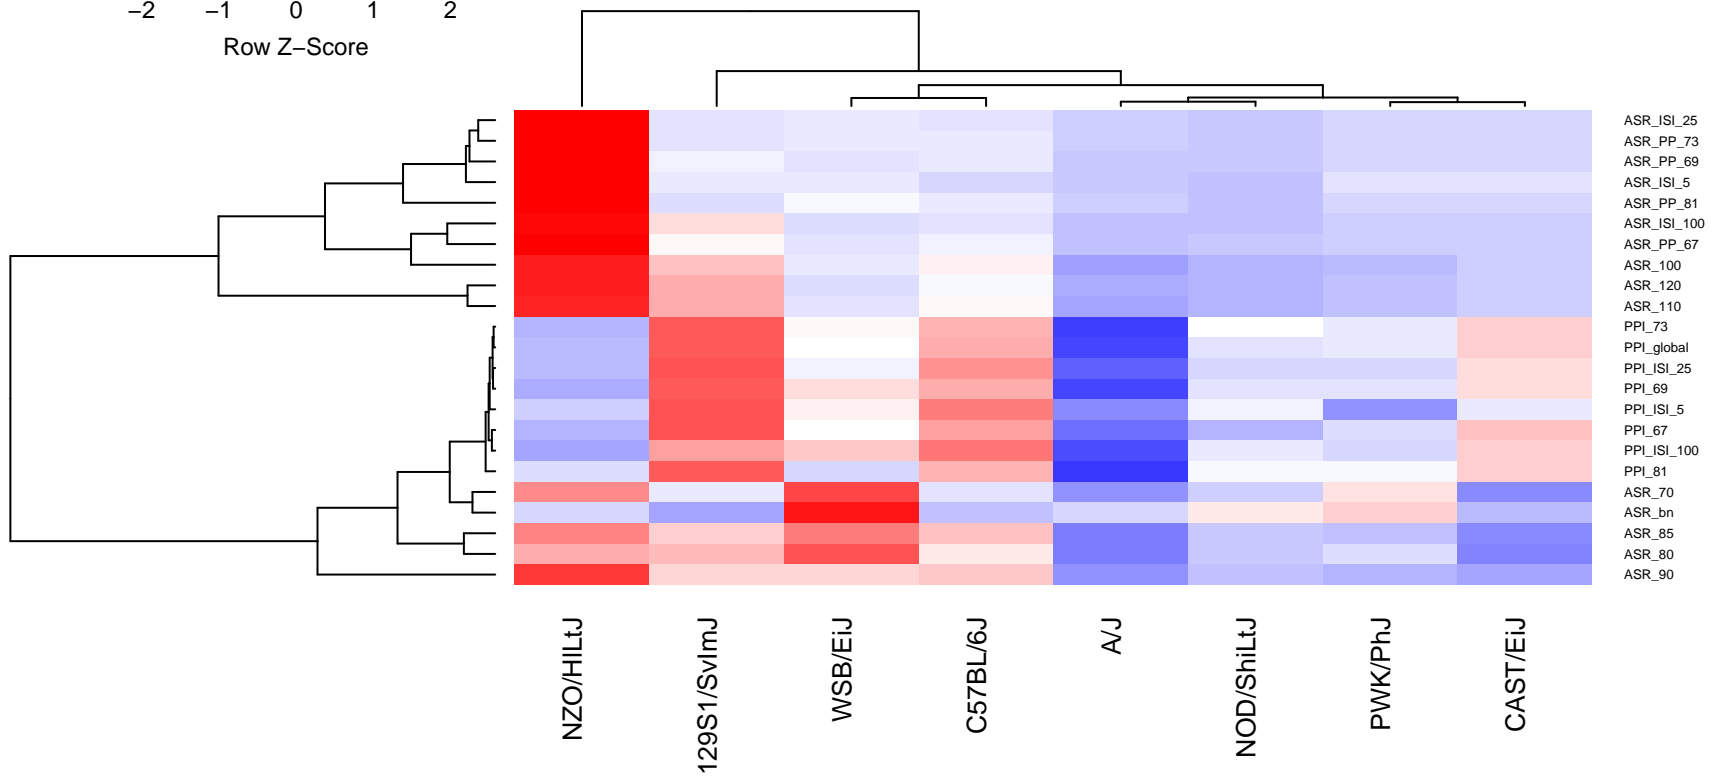

Color Key  
and Histogram

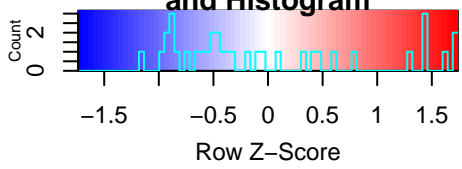

# GMC06

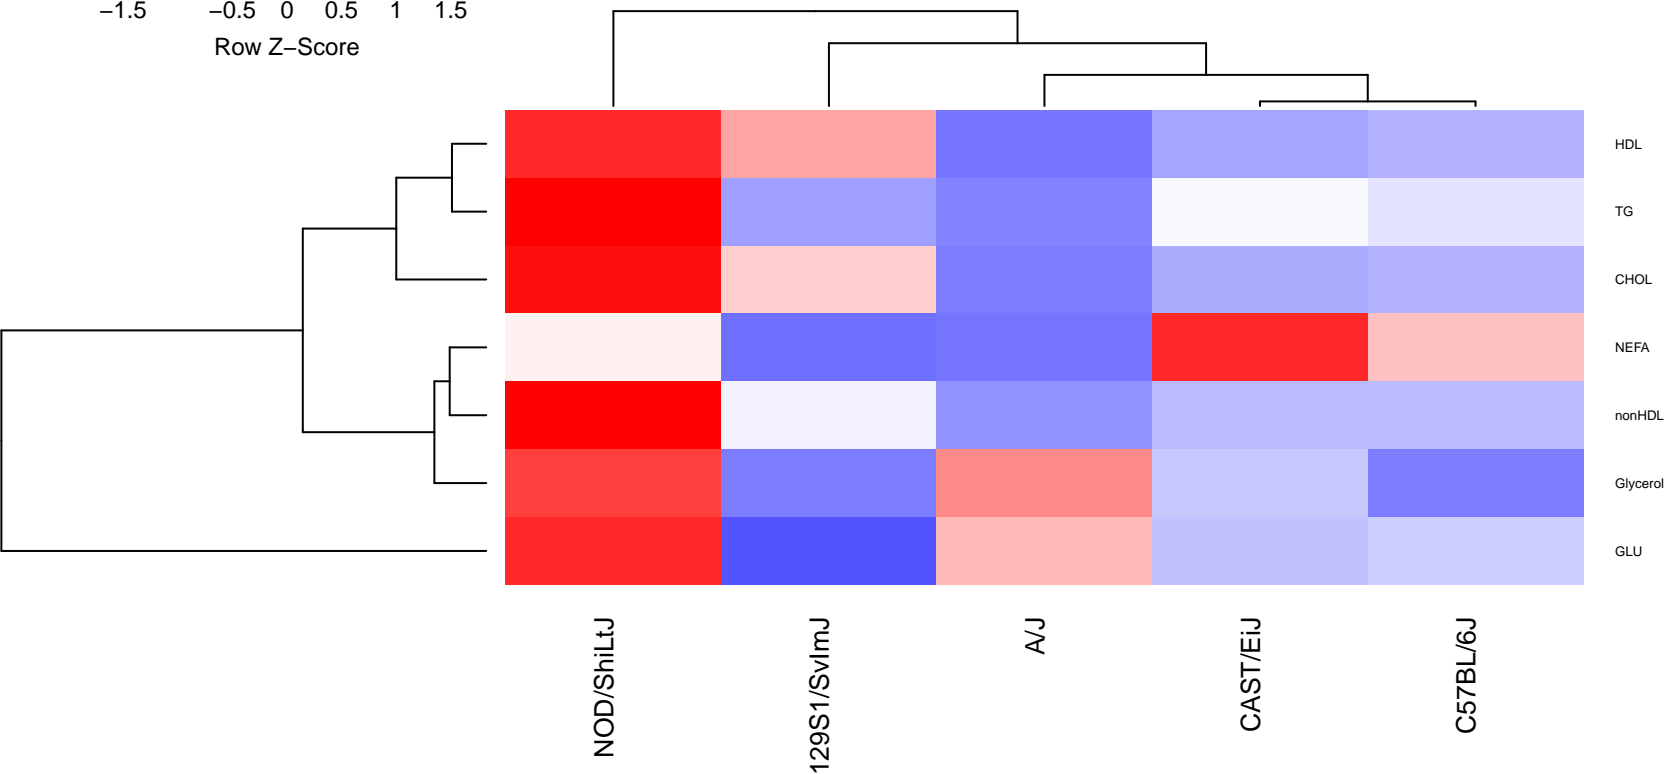

# GMC07

## Color Key and Histogram

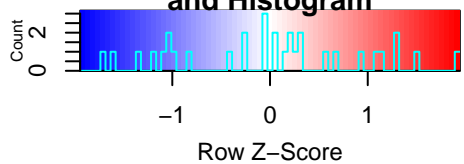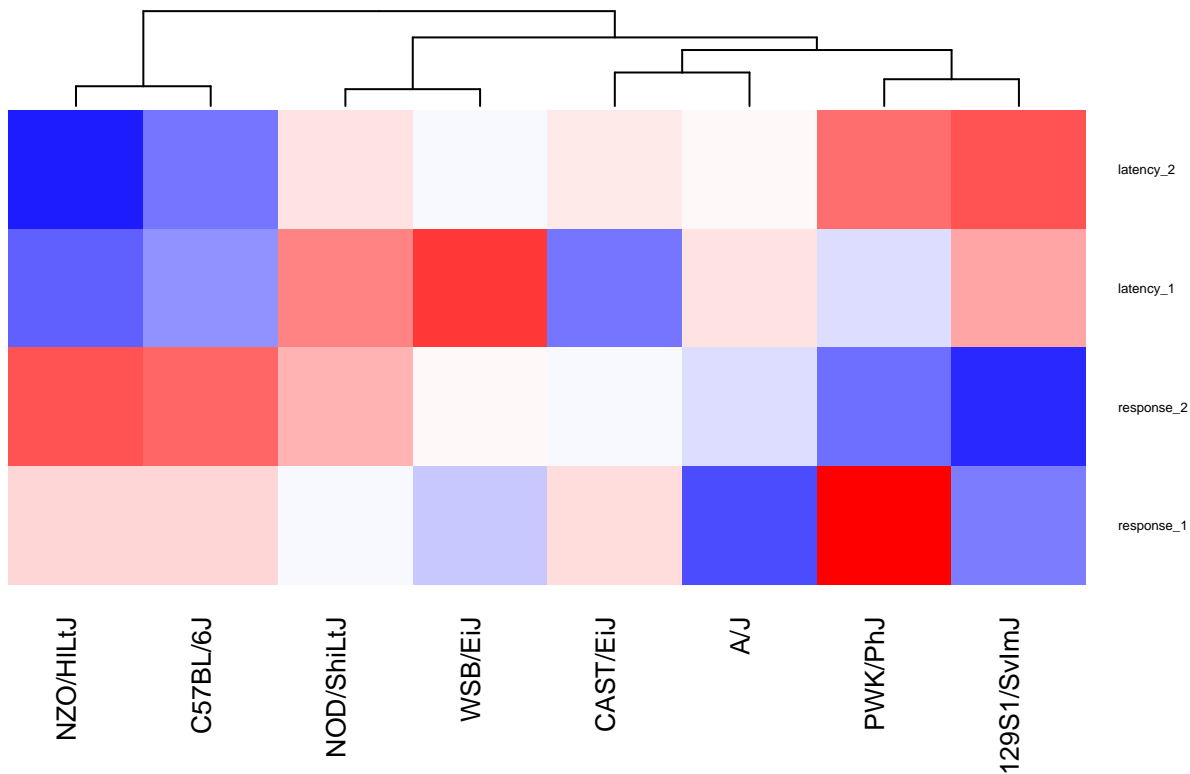

### Color Key and Histogram

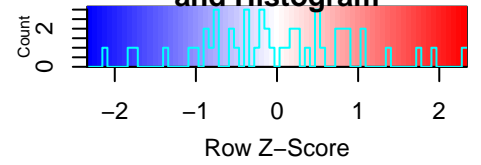

# GMC08

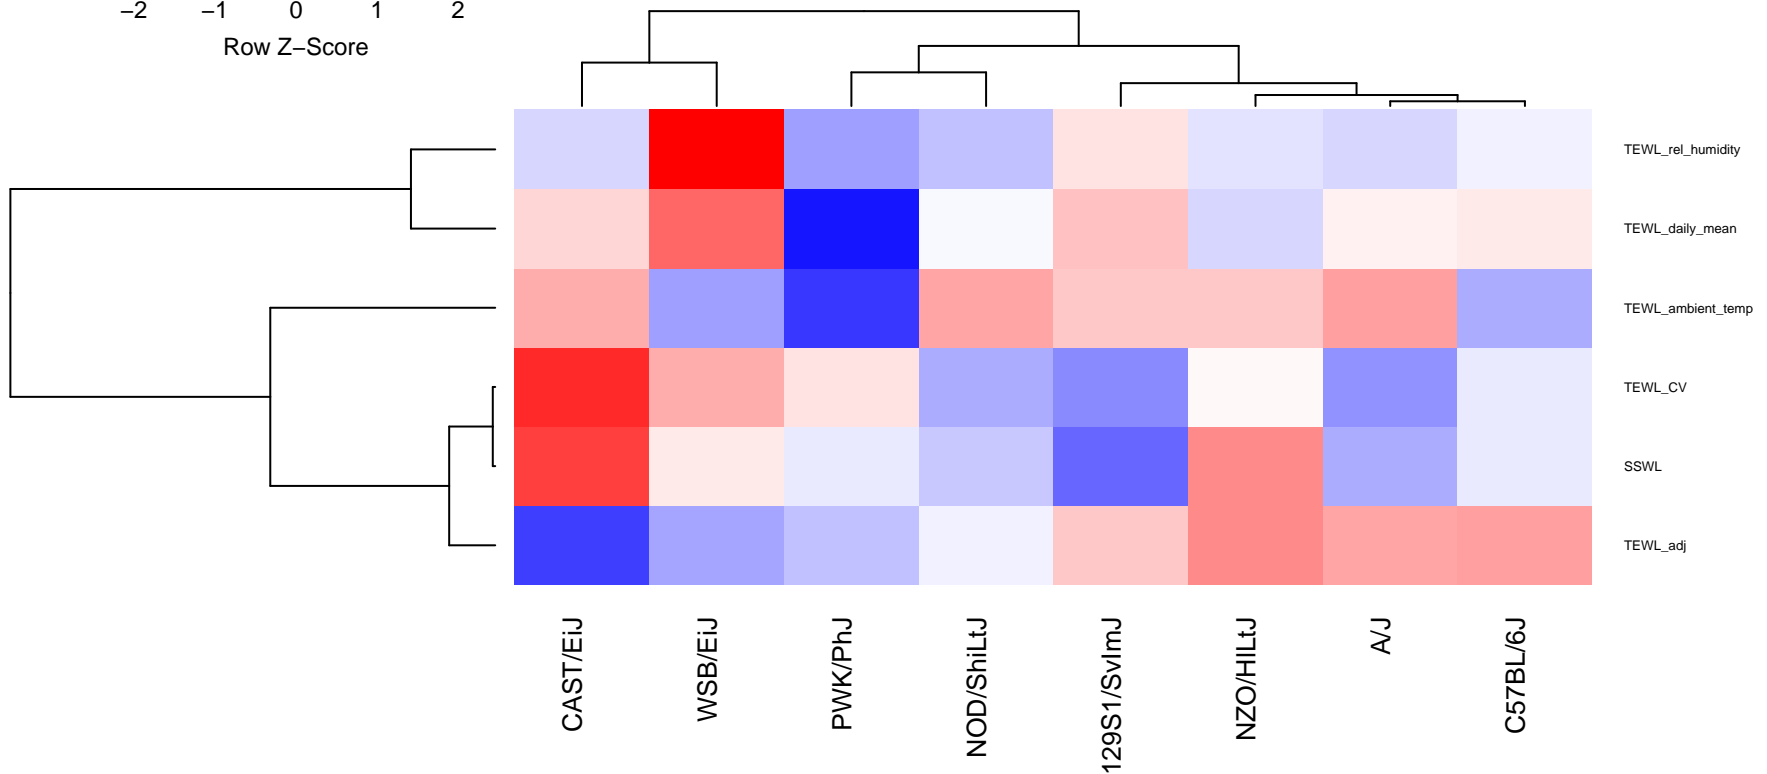



# Color Key and Histogram

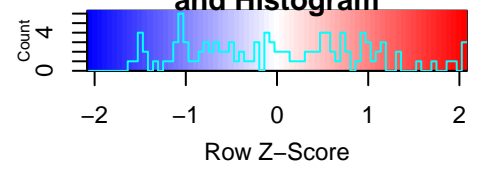

# GMC09

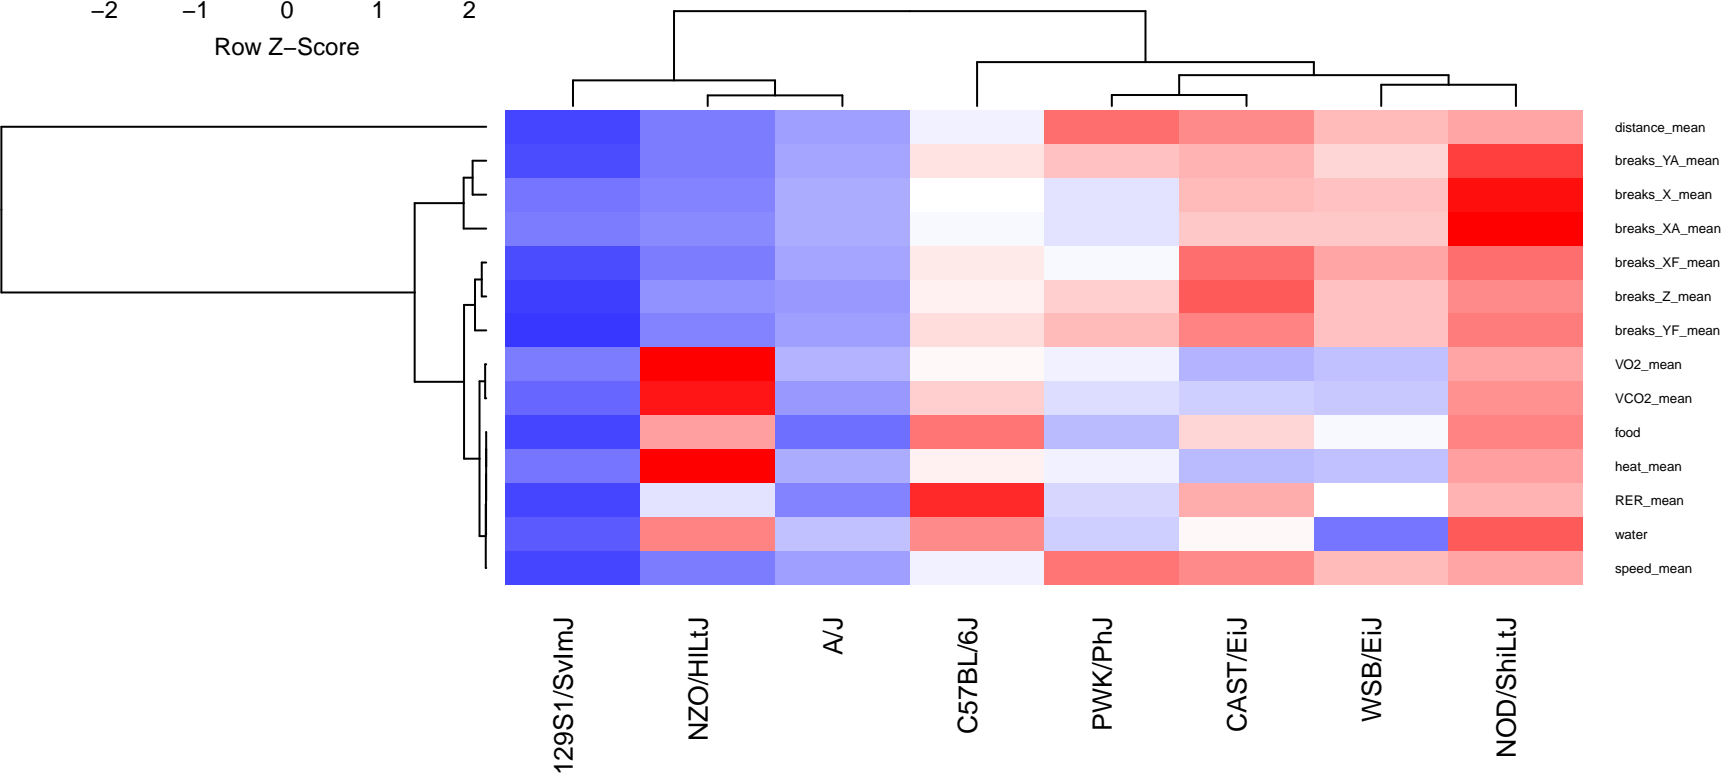

**Color Key  
and Histogram**

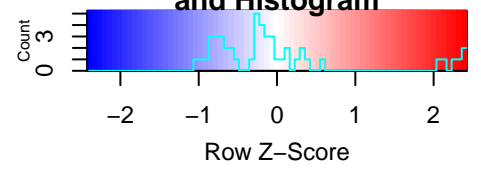

# GMC10

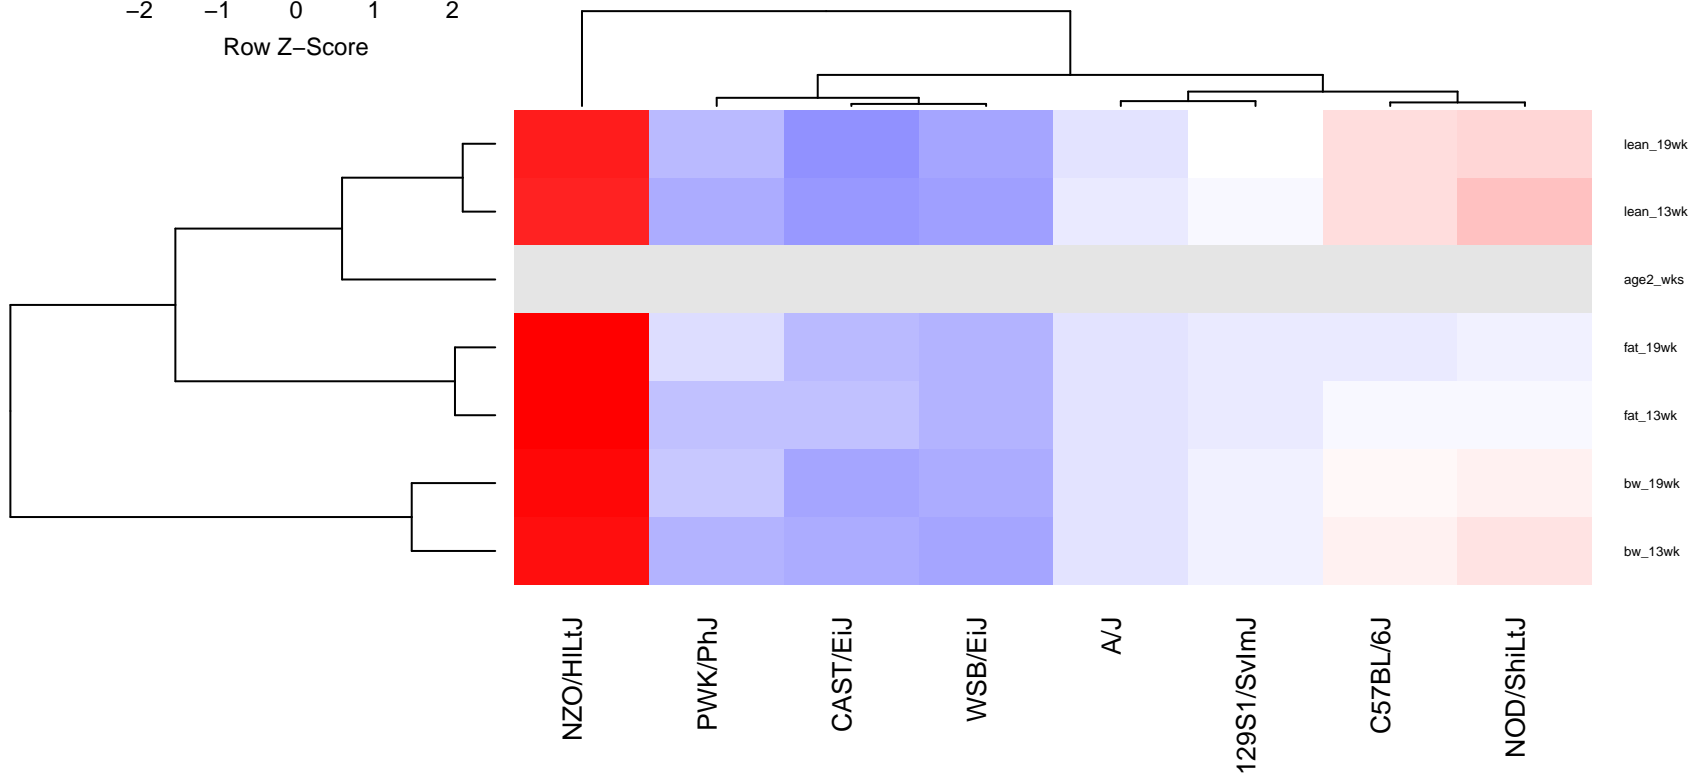

**Color Key  
and Histogram**

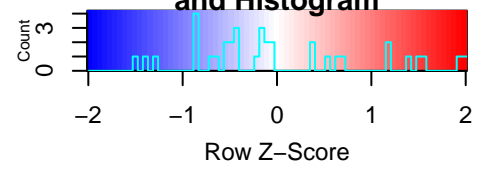

# GMC11

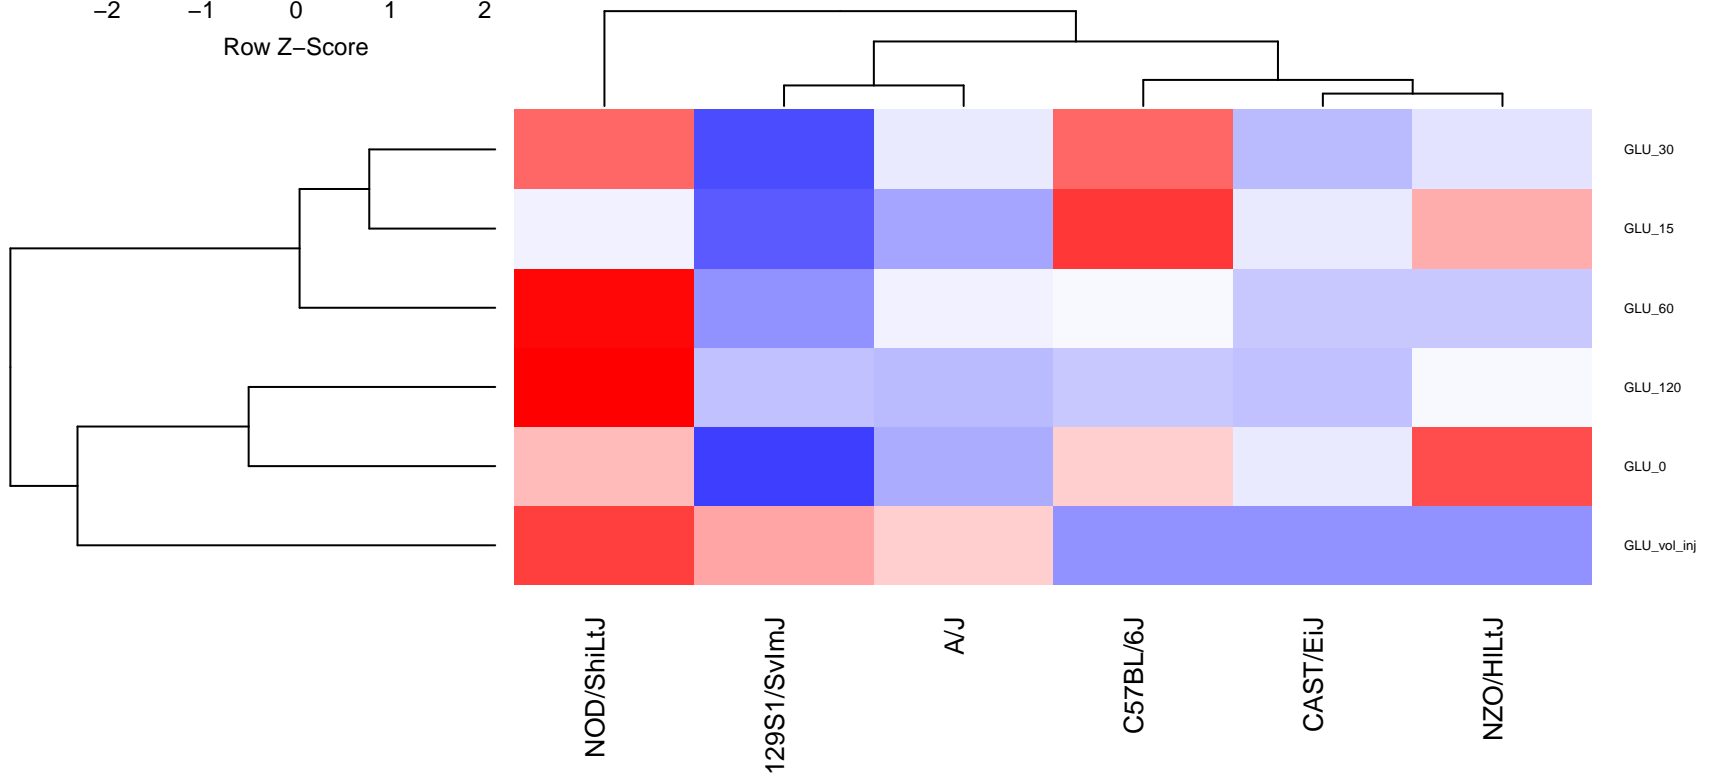

# Color Key and Histogram

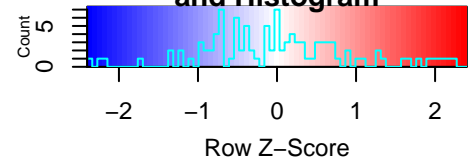

# GMC12

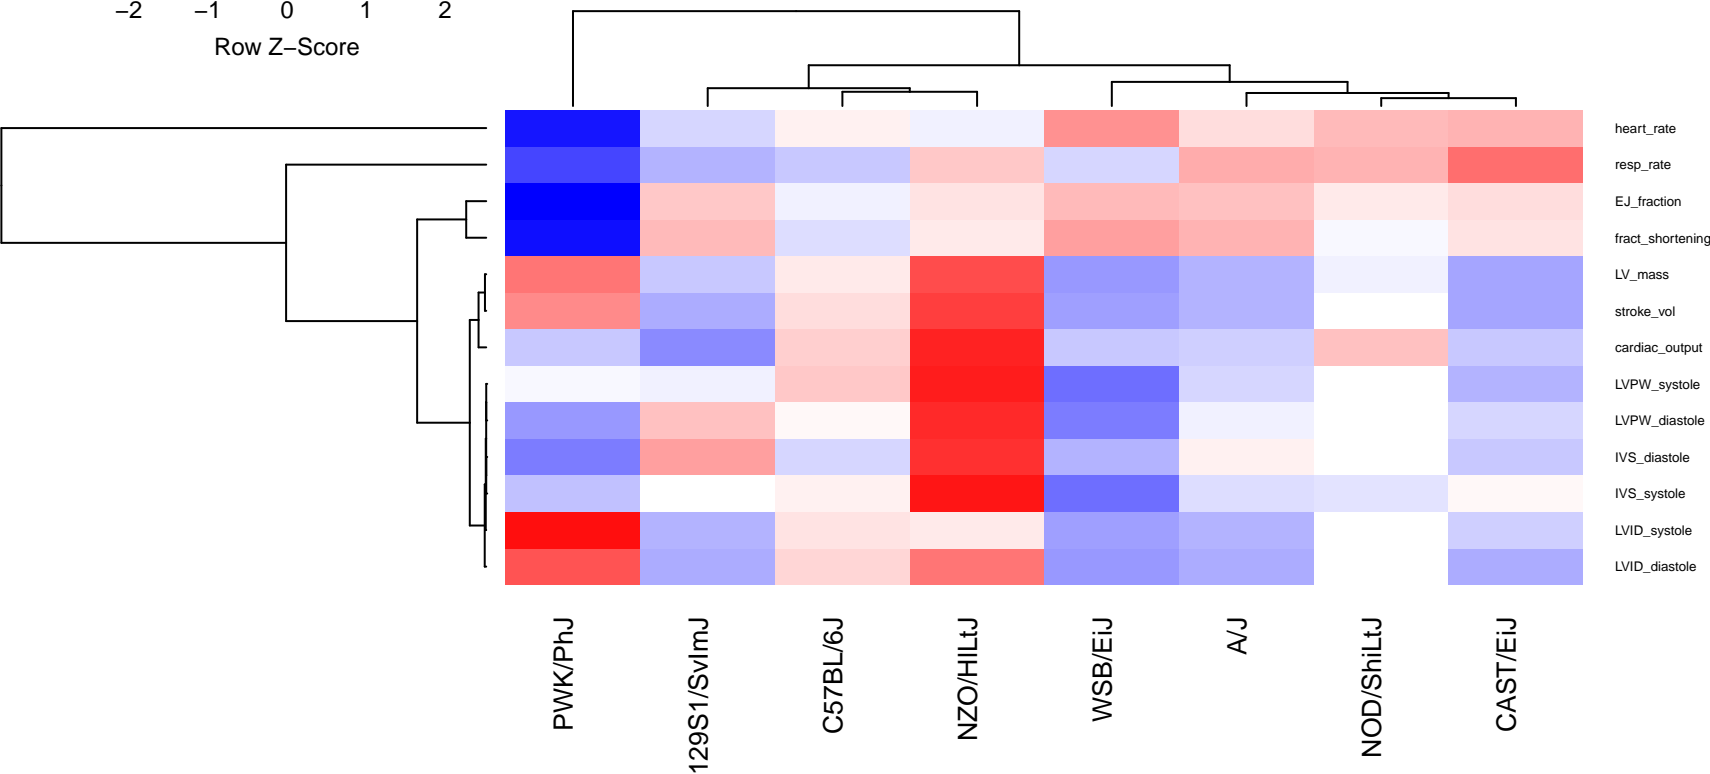

# Color Key and Histogram

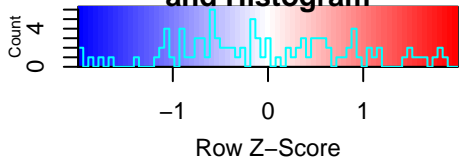

# GMC13

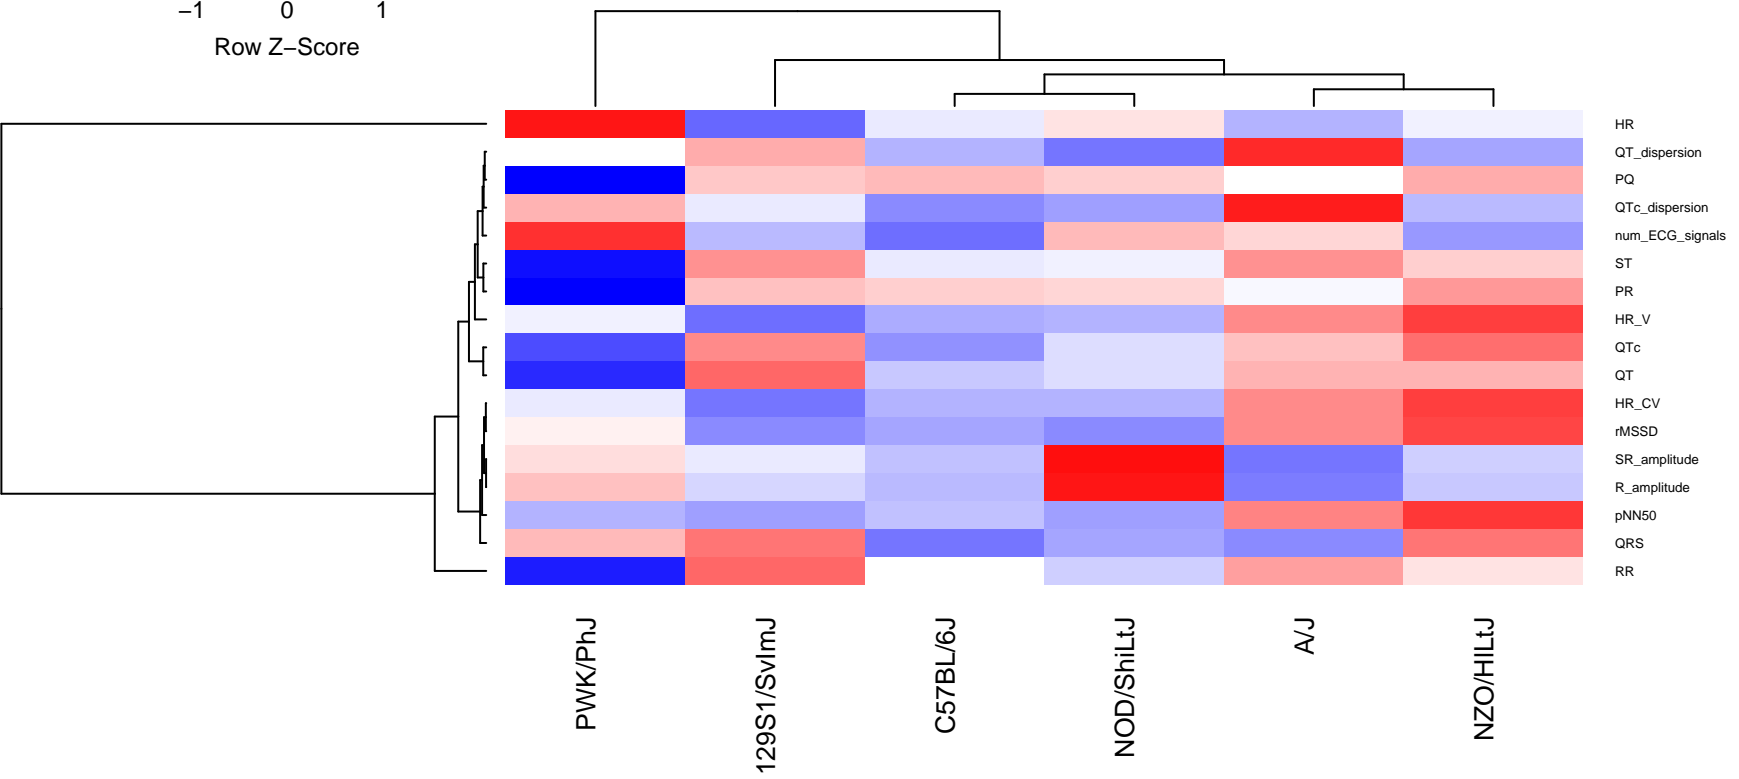

Color Key  
and Histogram

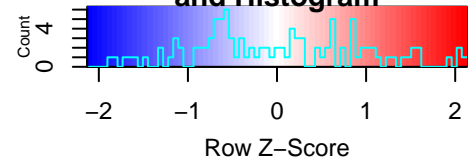

# GMC14

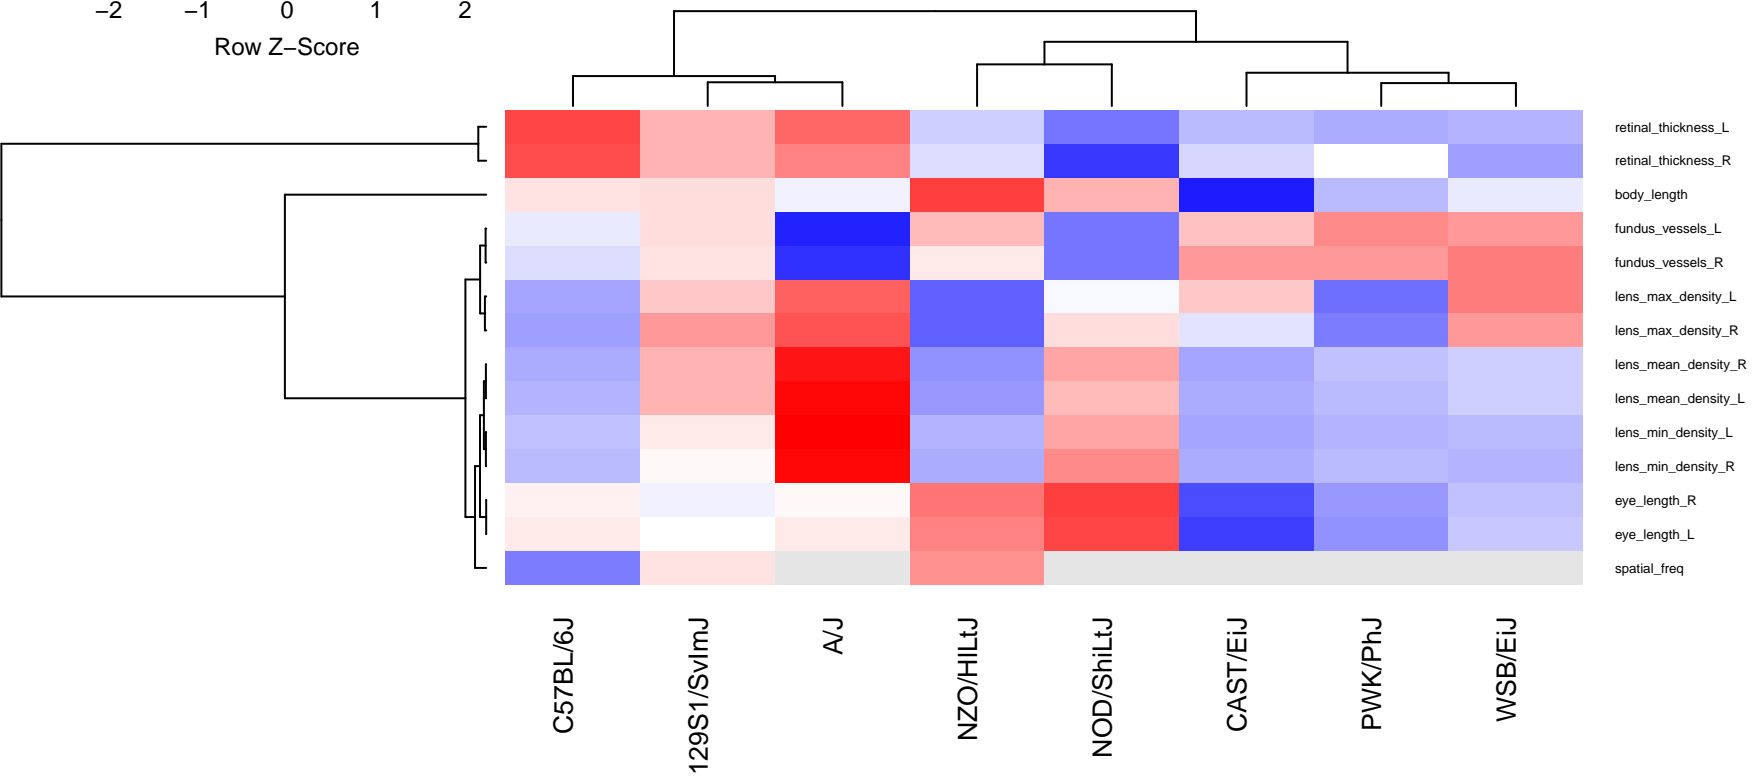

Color Key  
and Histogram

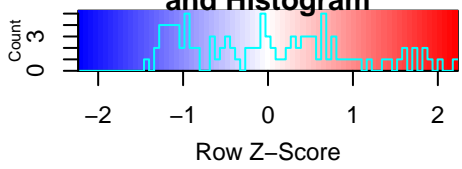

# GMC15

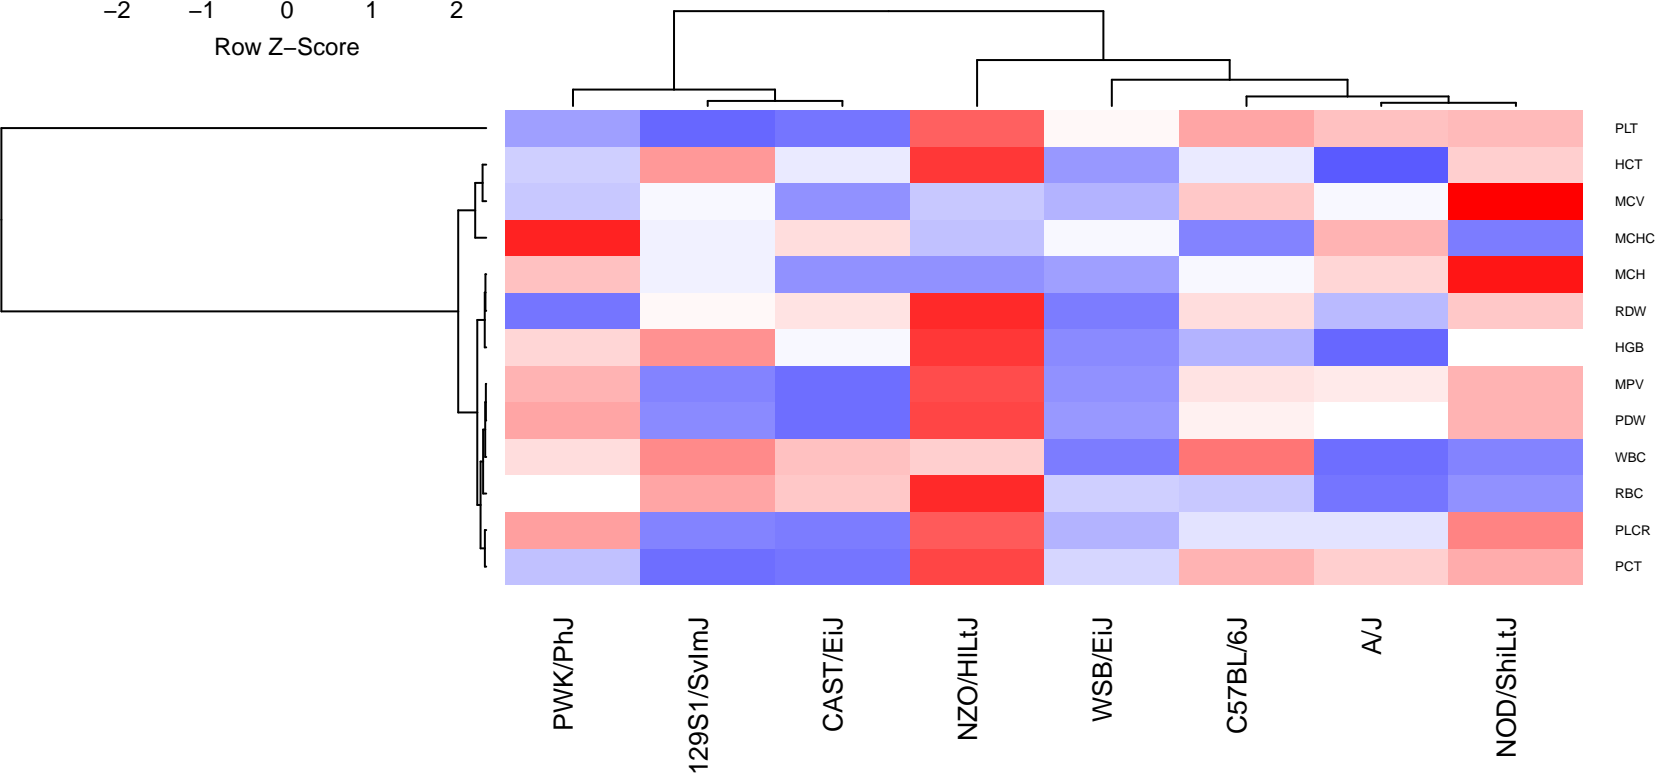

# Color Key and Histogram

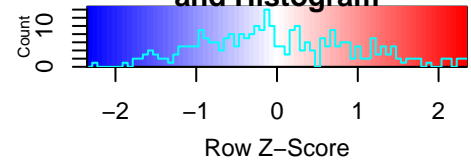

# GMC16

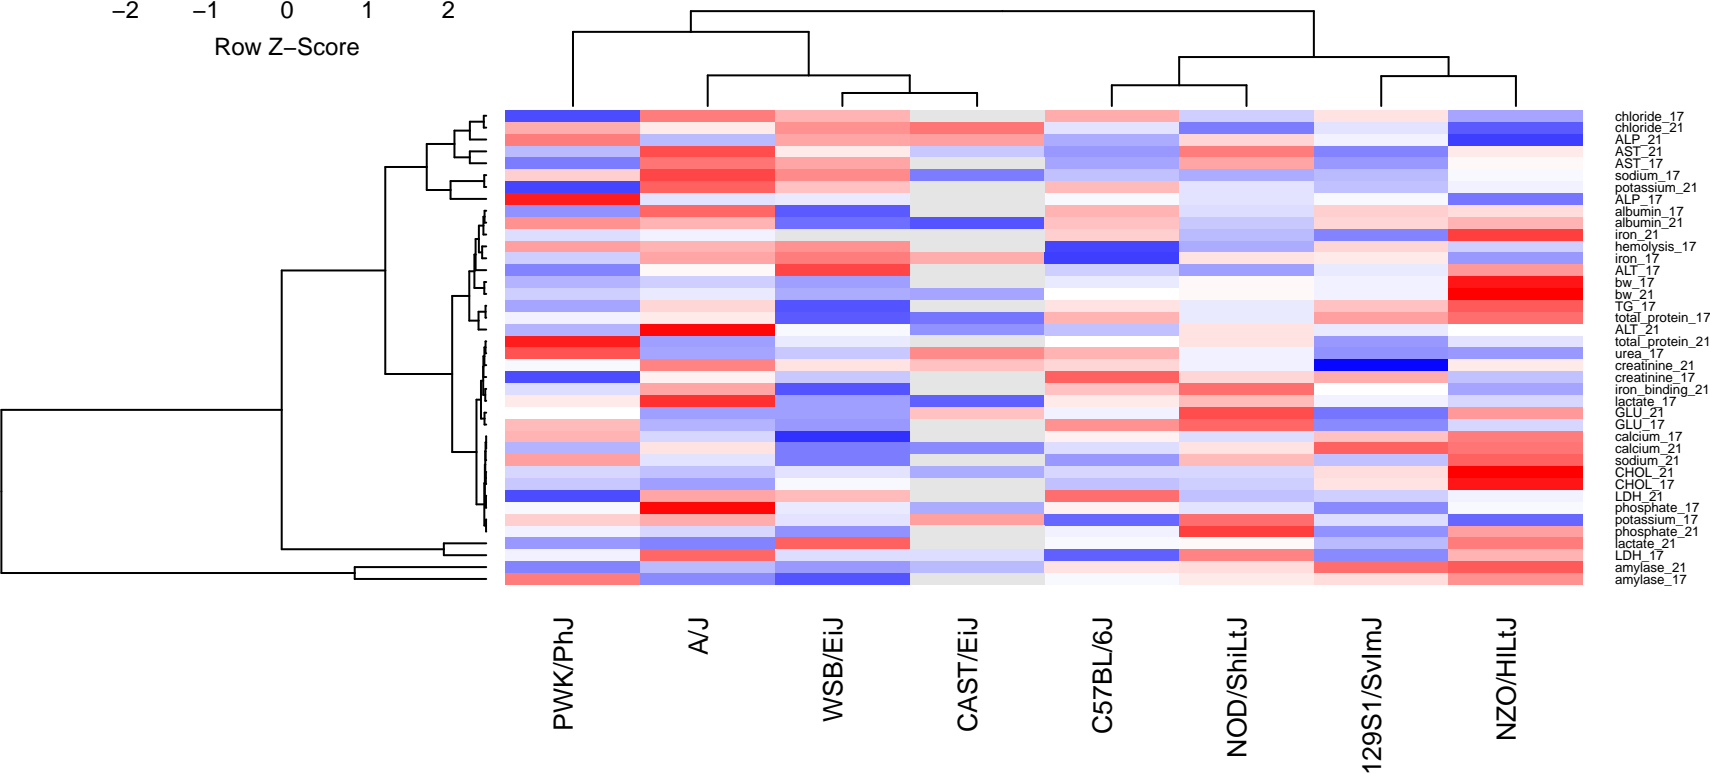

- chloride\_17
- chloride\_21
- ALP\_21
- AST\_21
- AST\_17
- sodium\_17
- potassium\_21
- ALP\_17
- albumin\_17
- albumin\_21
- iron\_21
- hemolysis\_17
- iron\_17
- ALT\_17
- bw\_17
- bw\_21
- TG\_17
- total\_protein\_17
- ALT\_21
- total\_protein\_21
- urea\_17
- creatinine\_21
- creatinine\_17
- iron\_binding\_21
- lactate\_17
- GLU\_21
- GLU\_17
- calcium\_17
- calcium\_21
- sodium\_21
- CHOL\_21
- CHOL\_17
- LDH\_21
- phosphate\_17
- potassium\_17
- phosphate\_21
- lactate\_21
- LDH\_17
- amylase\_21
- amylase\_17



### Color Key and Histogram

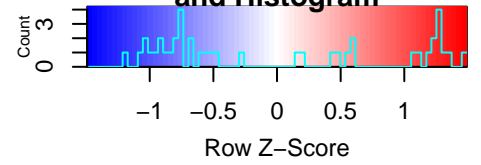

# GMC17

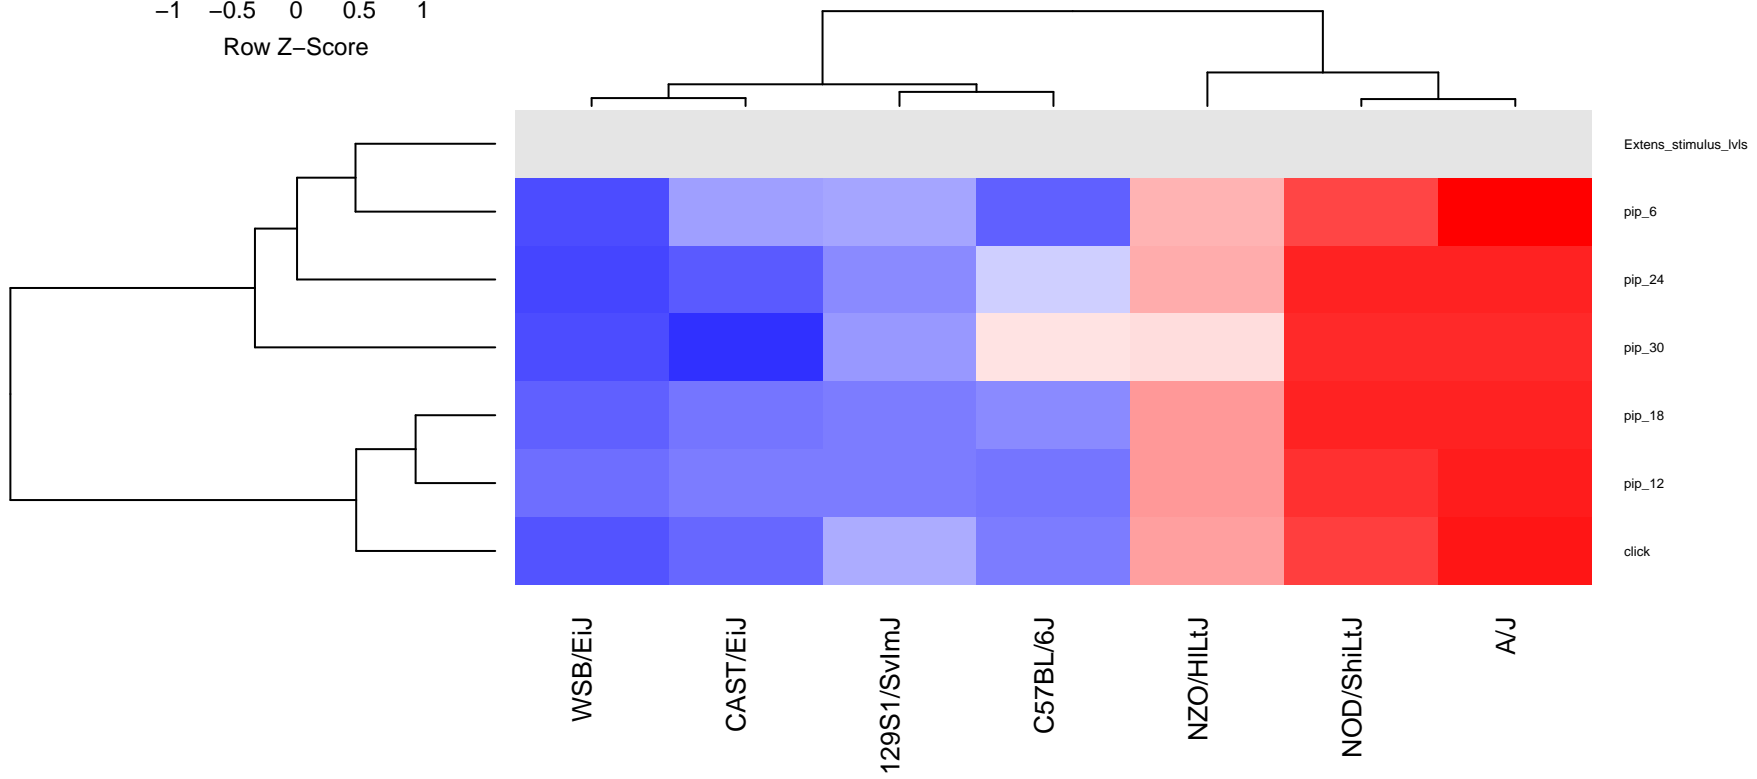

# Color Key and Histogram

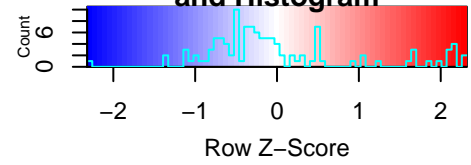

# GMC18

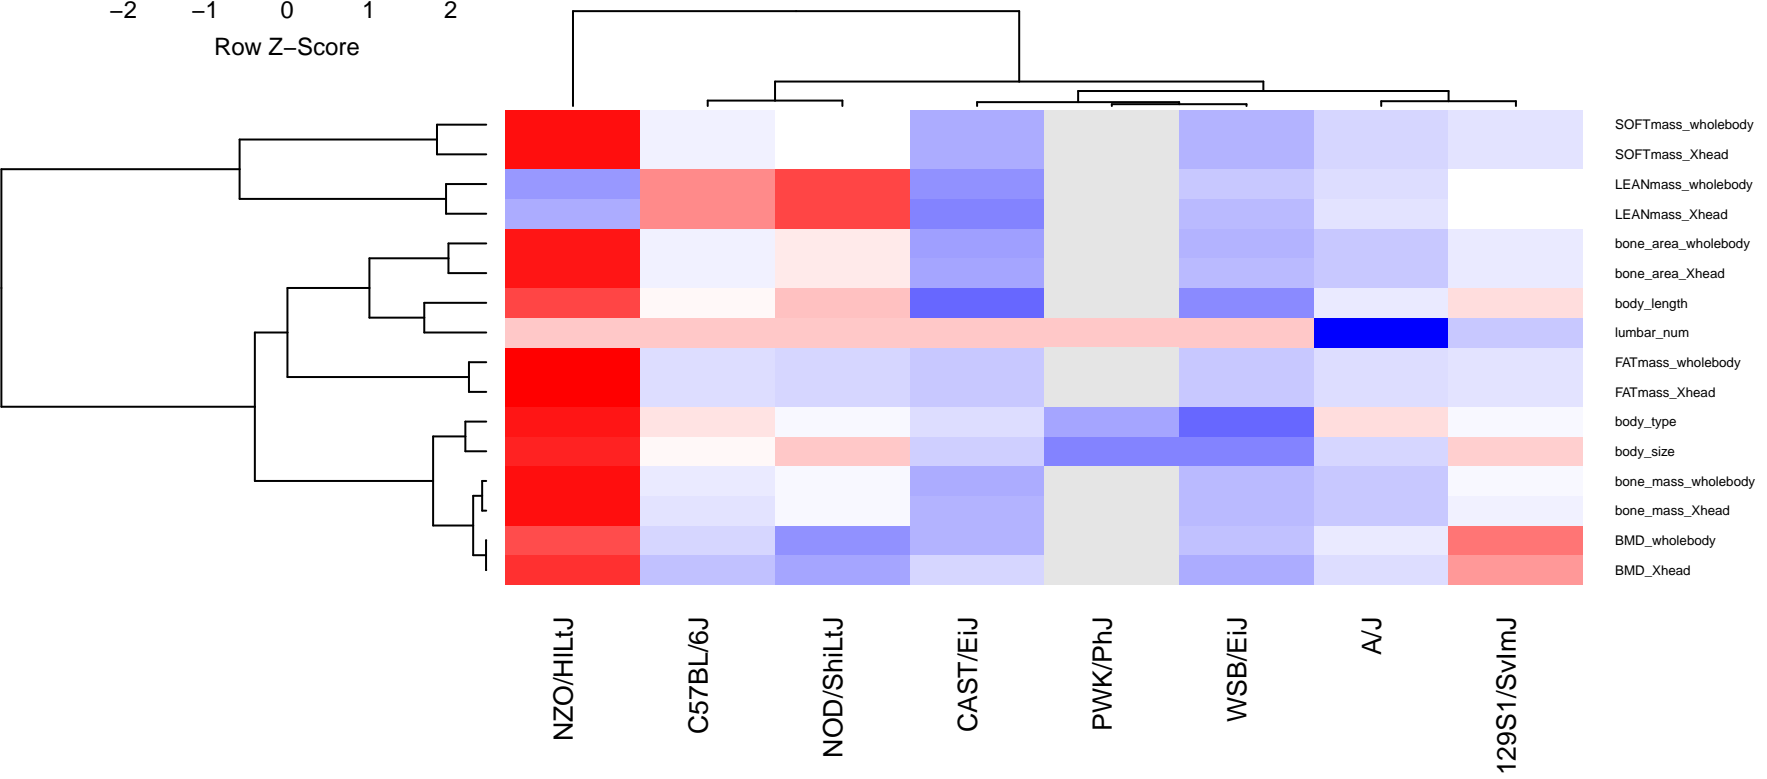



# Color Key and Histogram

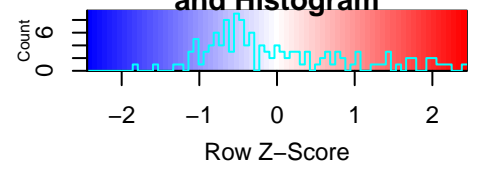

# GMC20

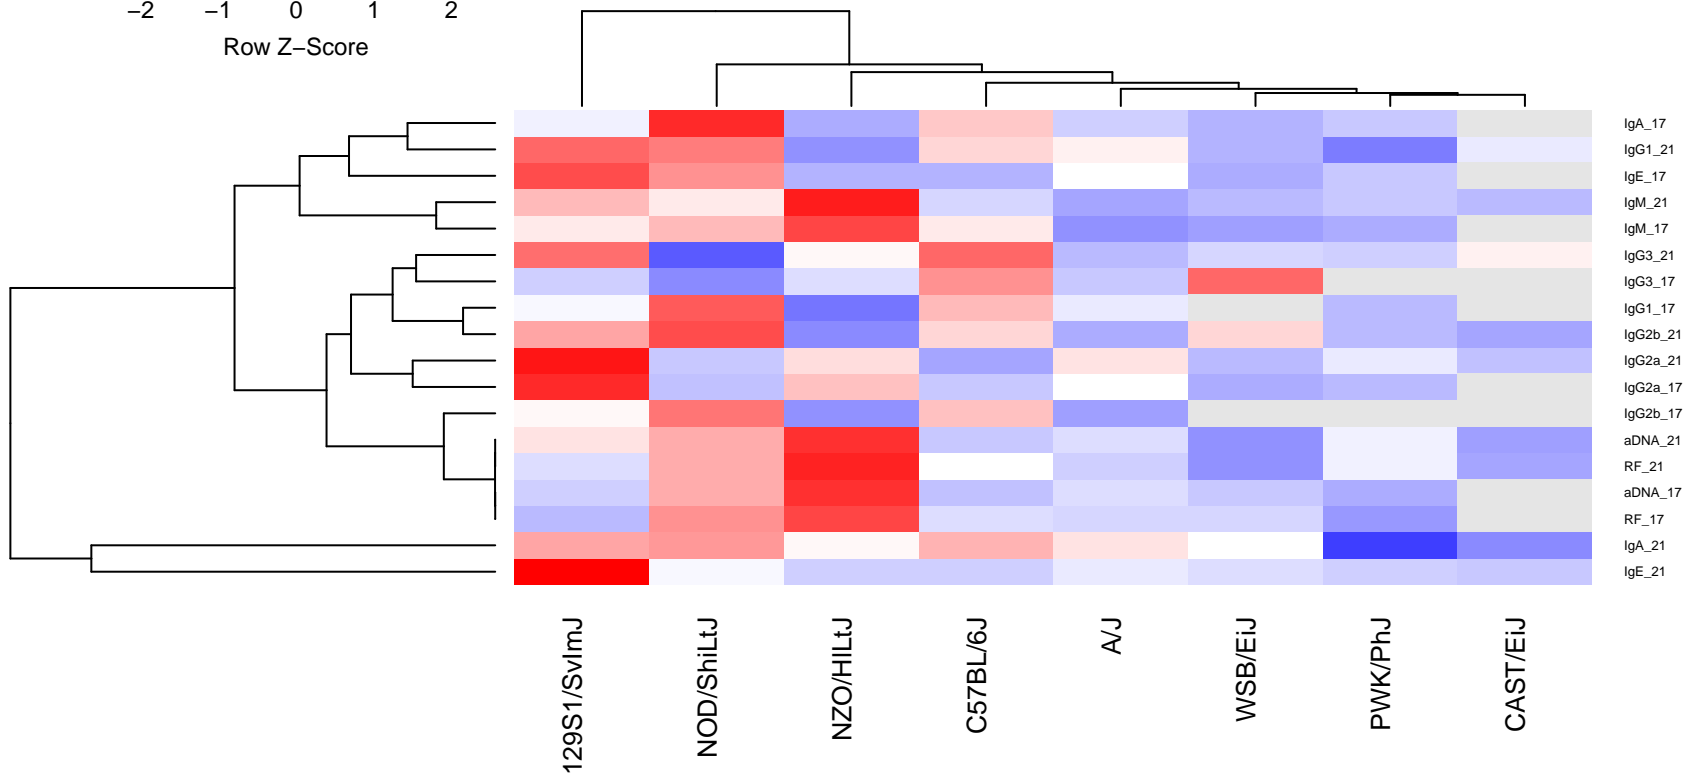

**Color Key  
and Histogram**

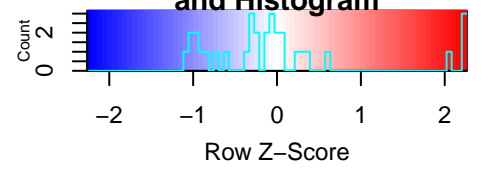

# GMC21

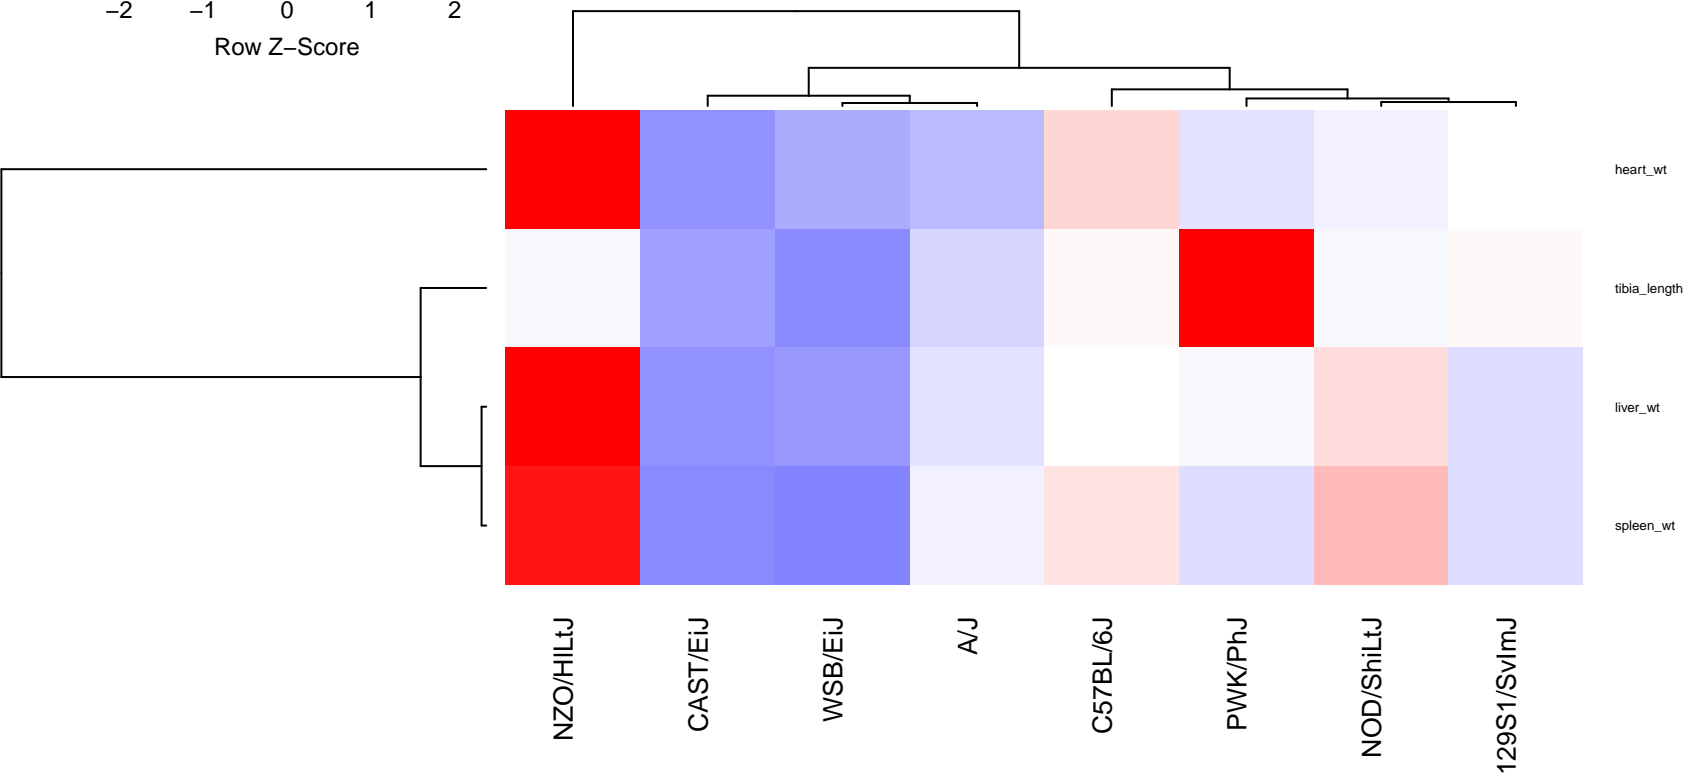

Supplement: 335_2020_9827_MOESM3_ESM.pdf [file 335_2020_9827_MOESM3_ESM.pdf]
