# Supplementary material for: A comprehensive and comparative phenotypic analysis of the collaborative founder strains identifies new and known phenotypes
Source: PubMed Central journal article supplement (PMC7060152; doi:10.1007/s00335-020-09827-3), 2020-02-14

Procedure: GMC01  
Parameter: center\_distance

# Figure S4

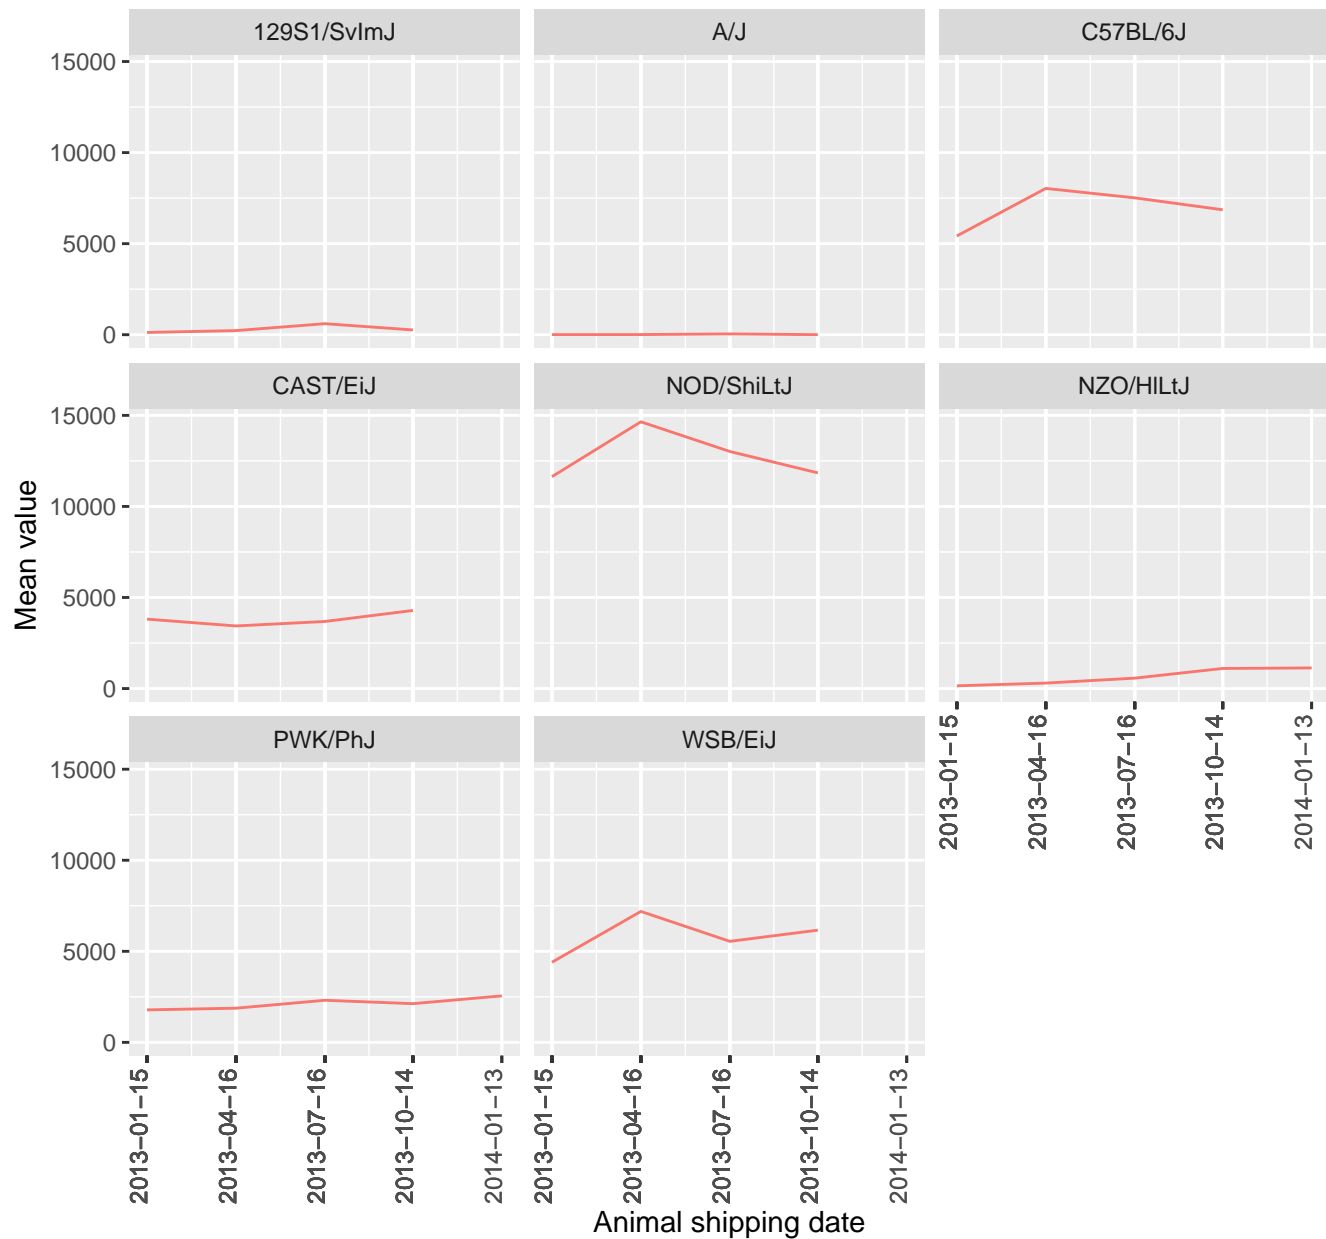

Procedure: GMC01

Parameter: center\_distance\_1

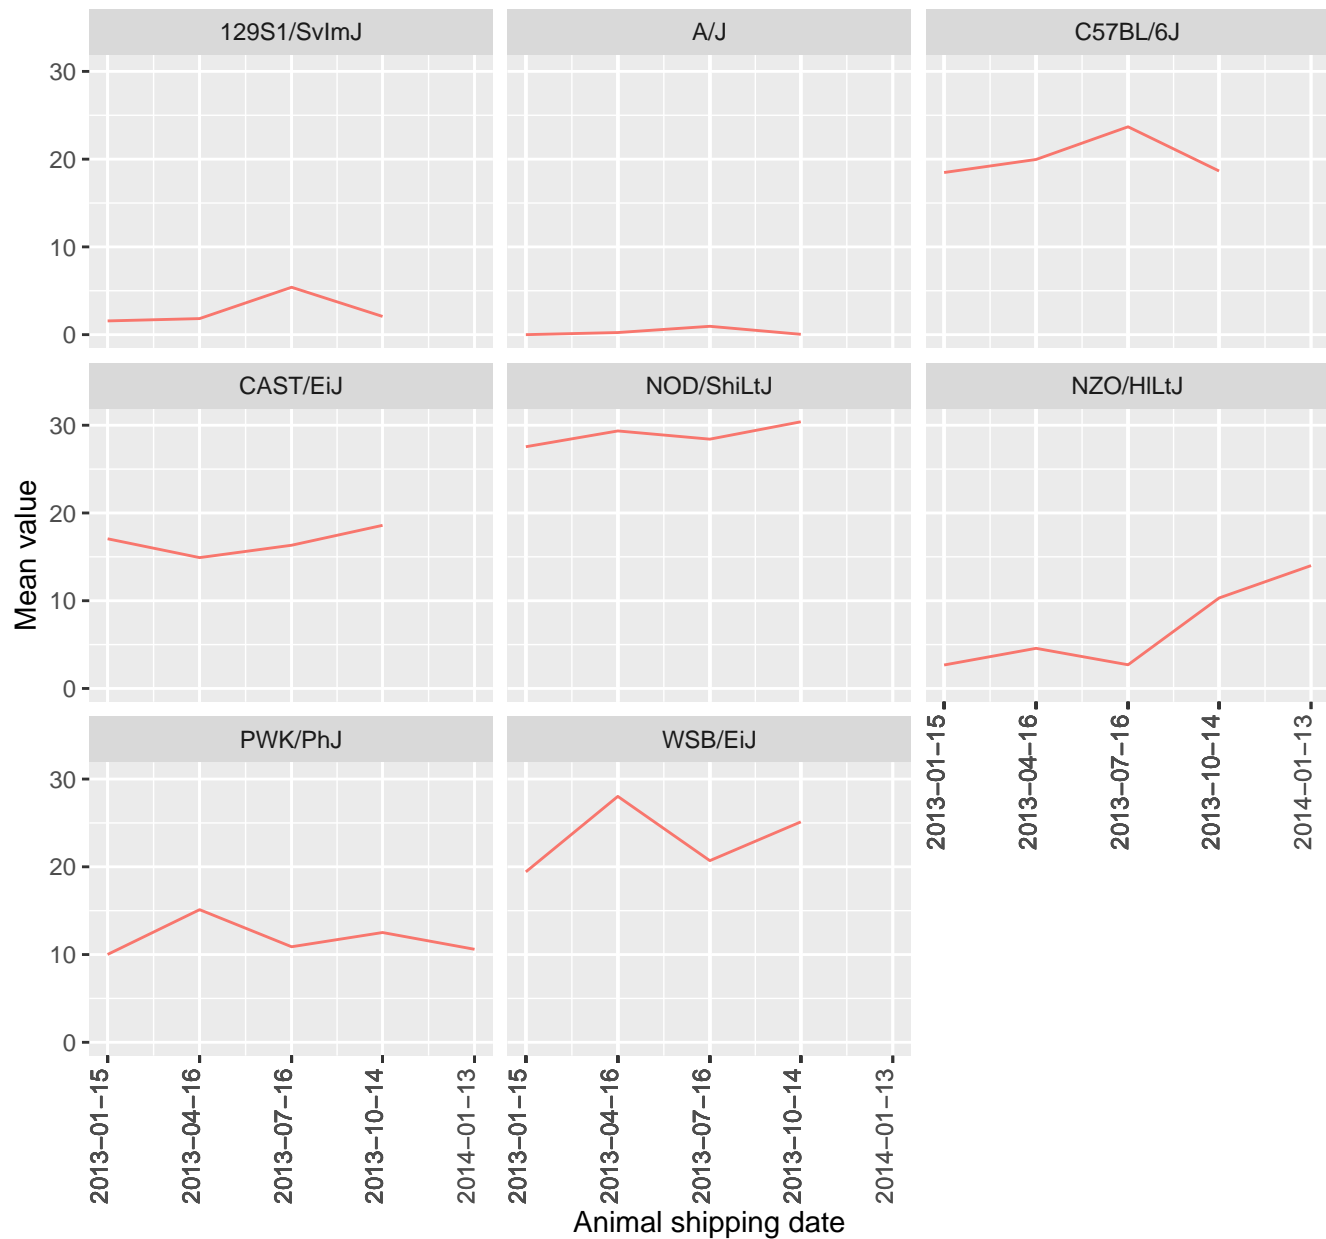

Procedure: GMC01

Parameter: center\_distance\_2

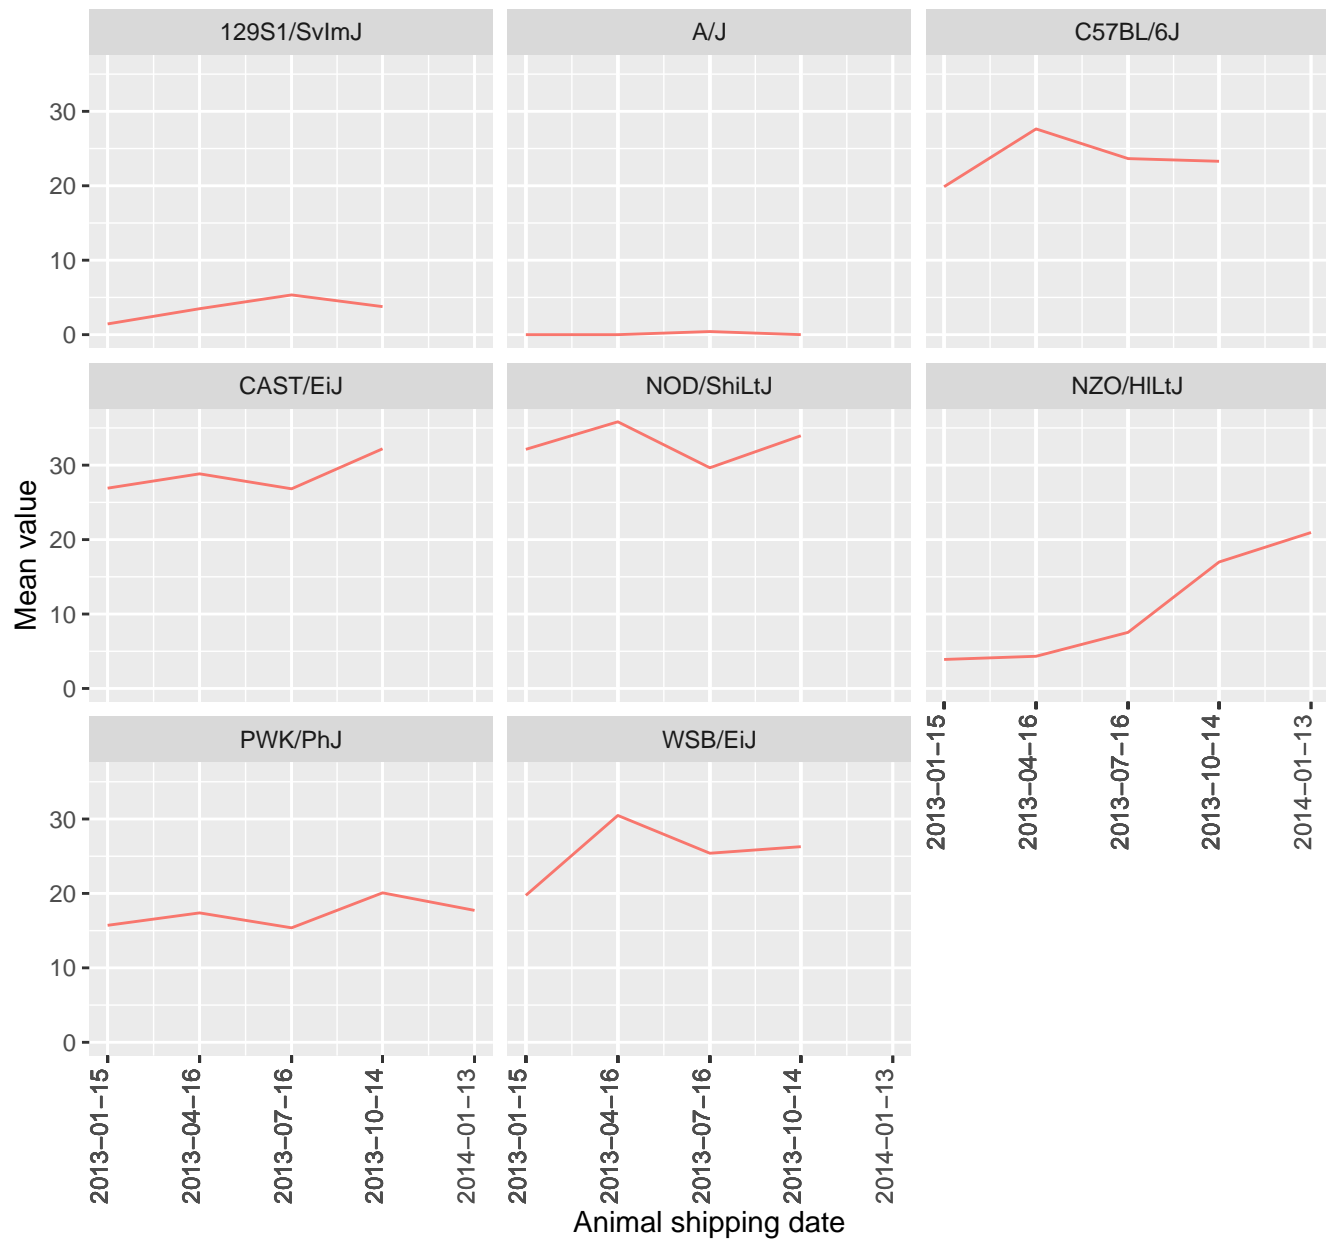

Procedure: GMC01

Parameter: center\_distance\_3

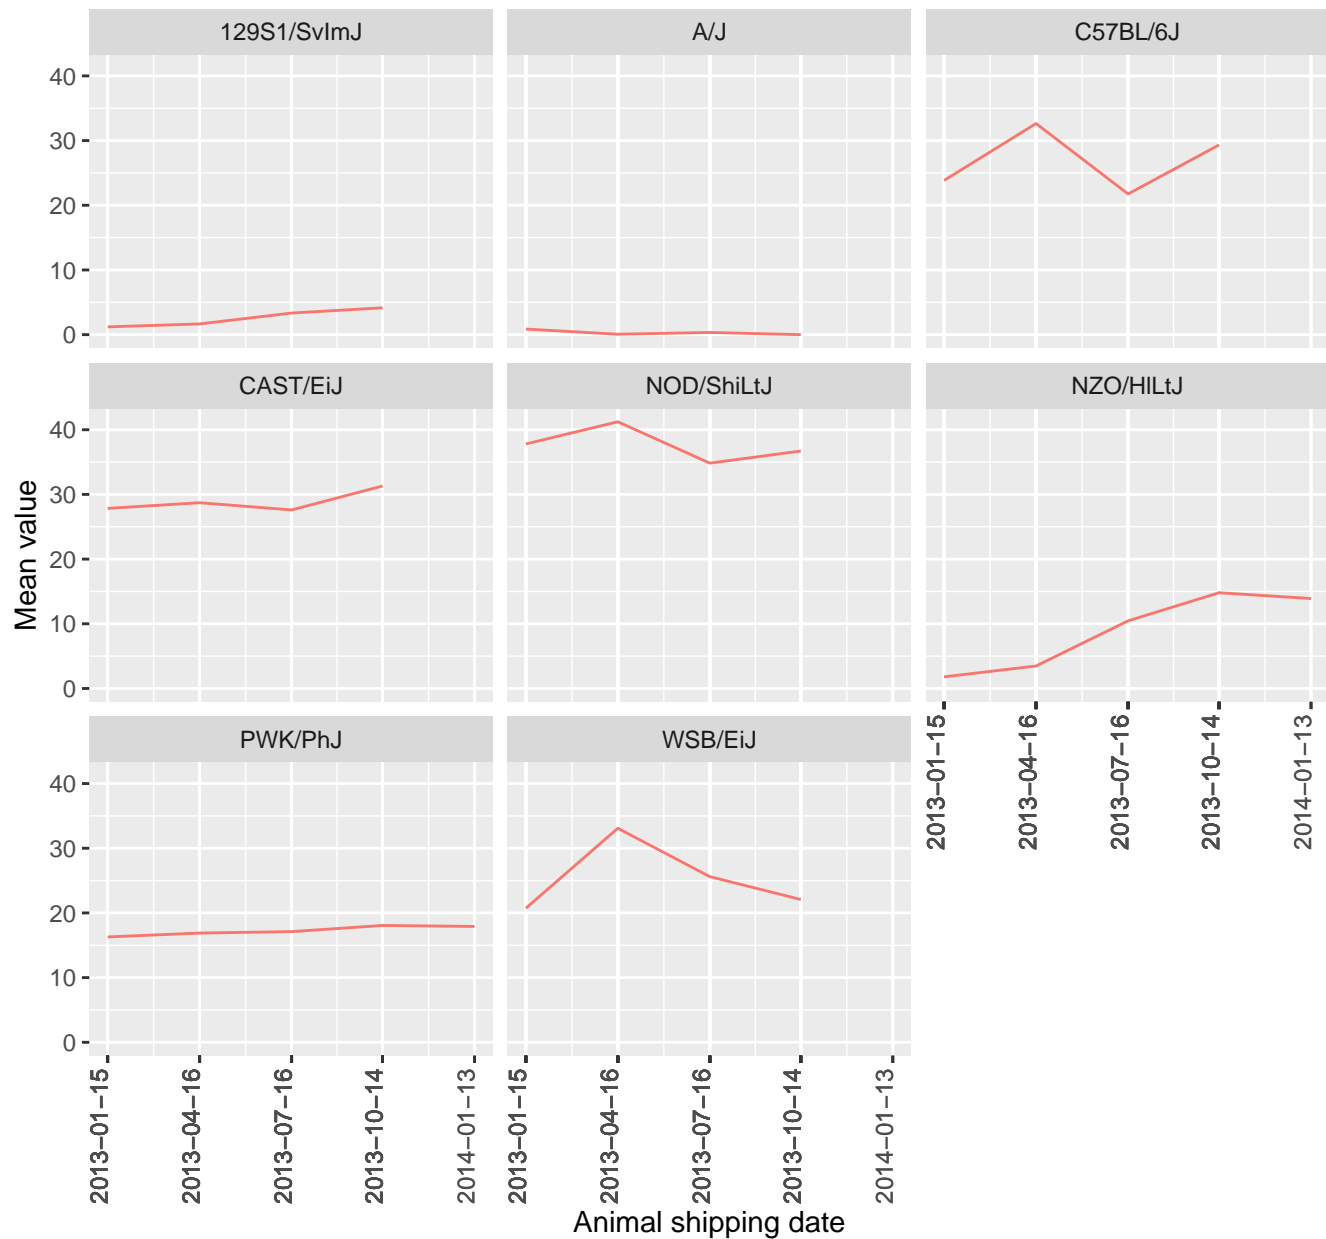

Procedure: GMC01

Parameter: center\_distance\_4

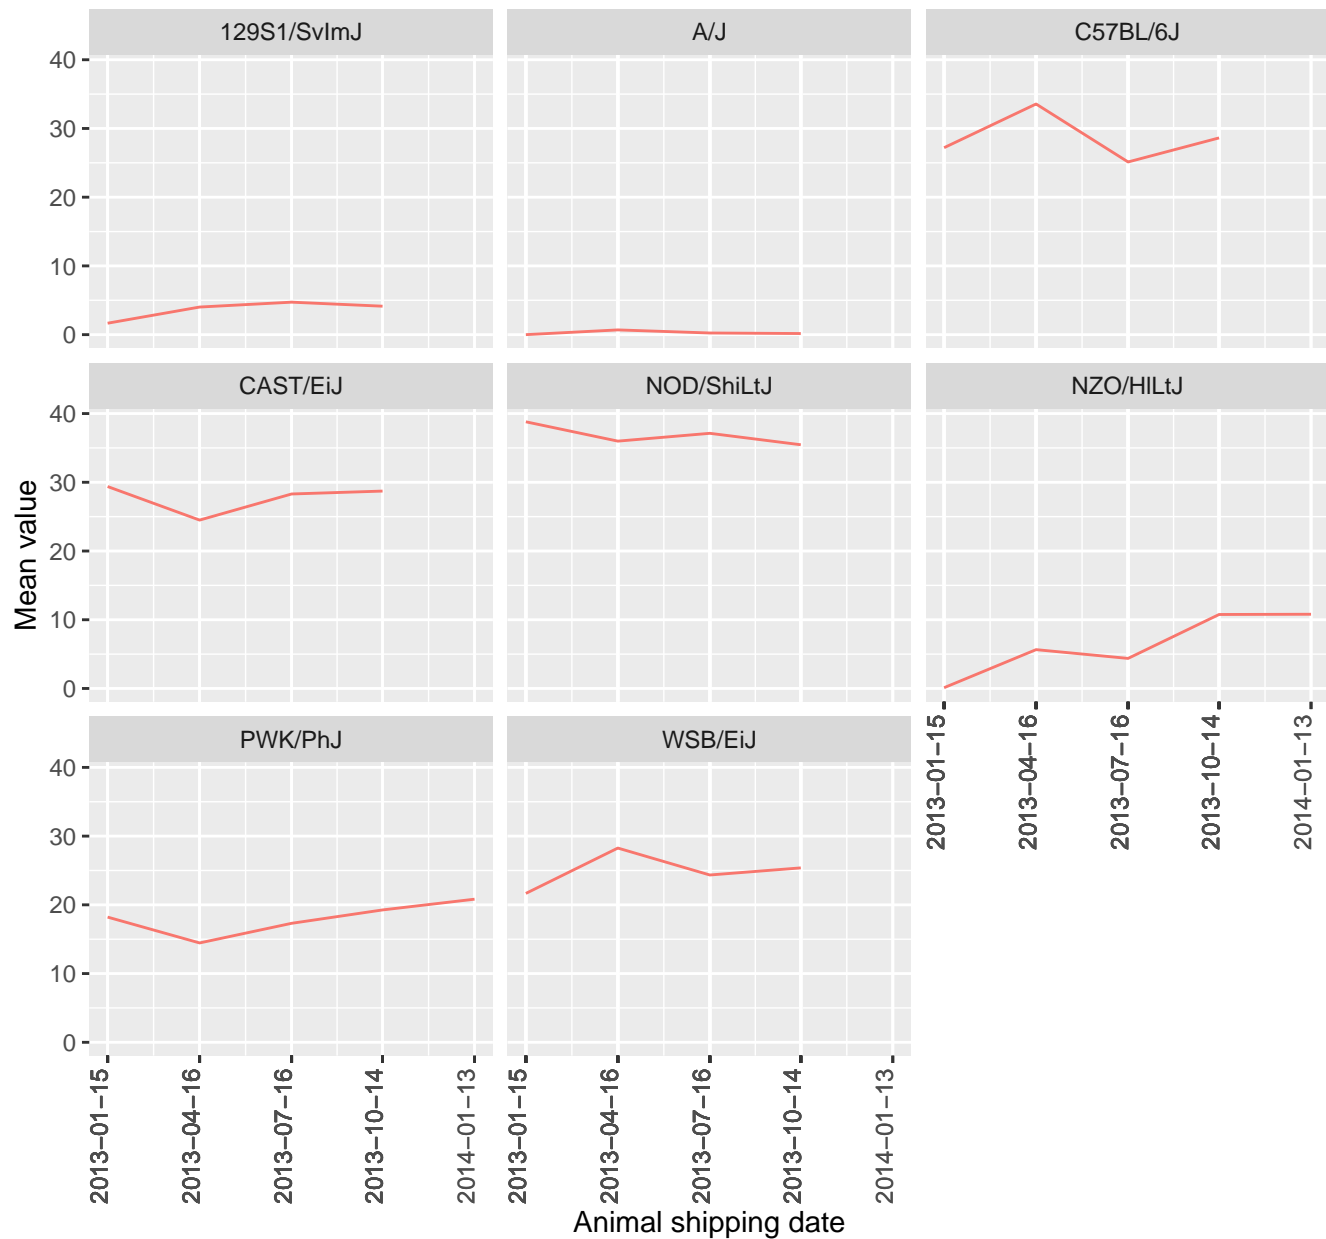

Procedure: GMC01

Parameter: center\_distance\_total

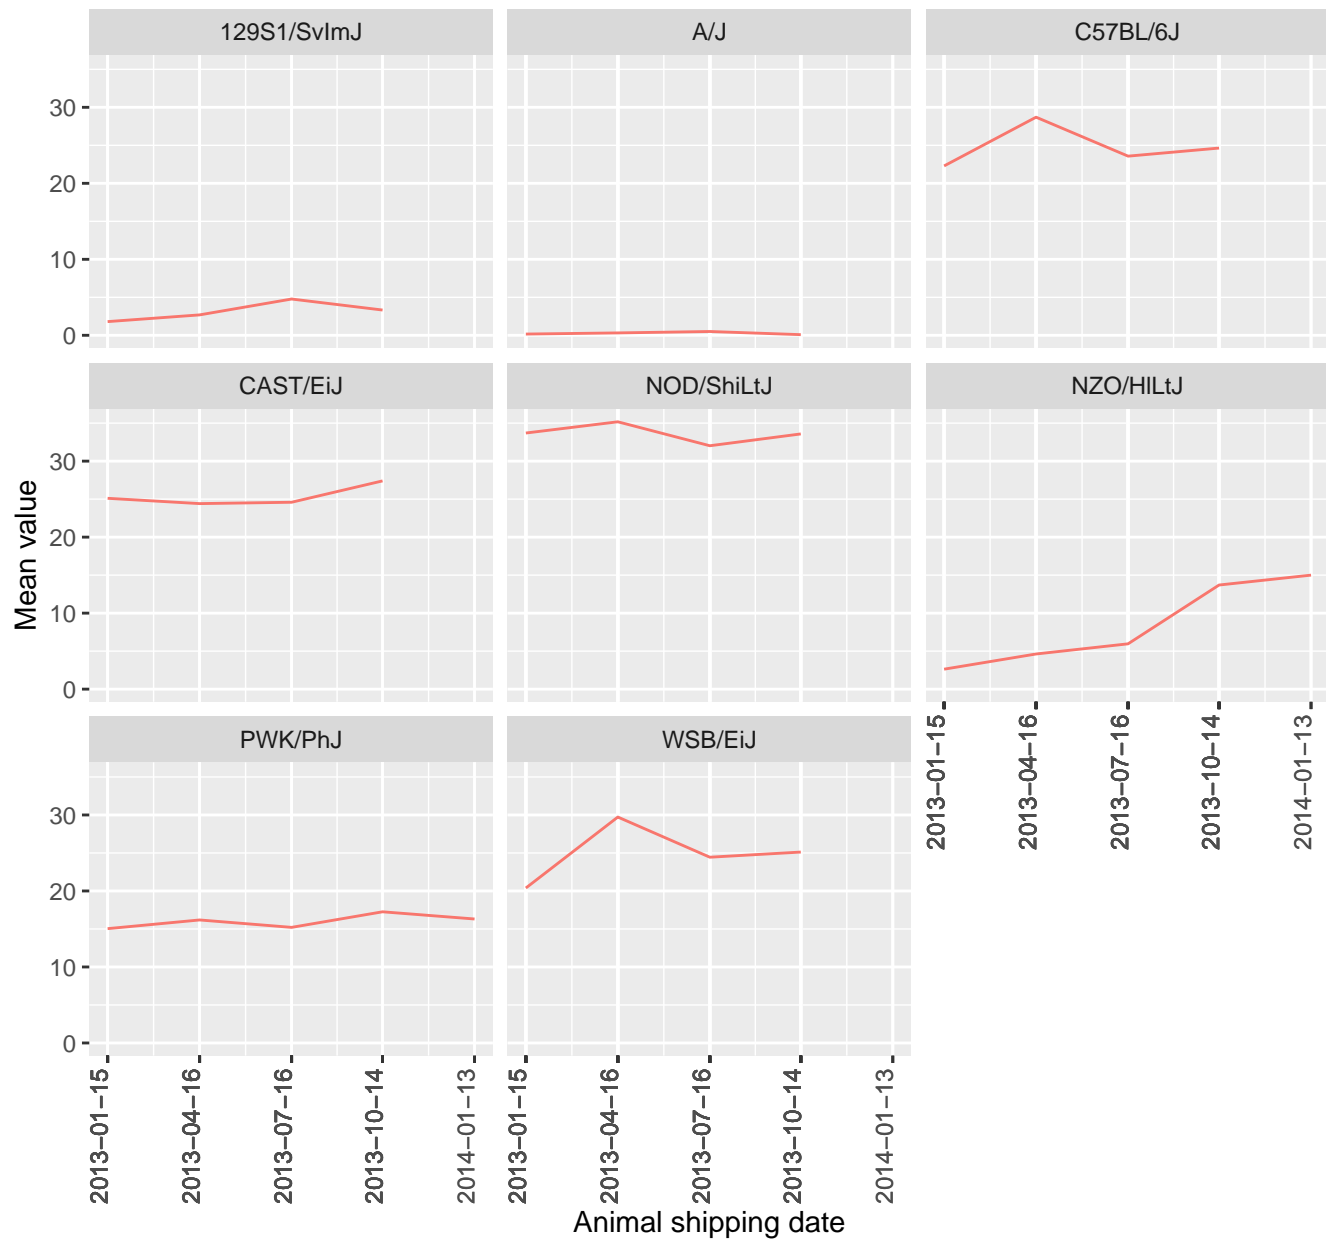

Procedure: GMC01  
Parameter: center\_entries

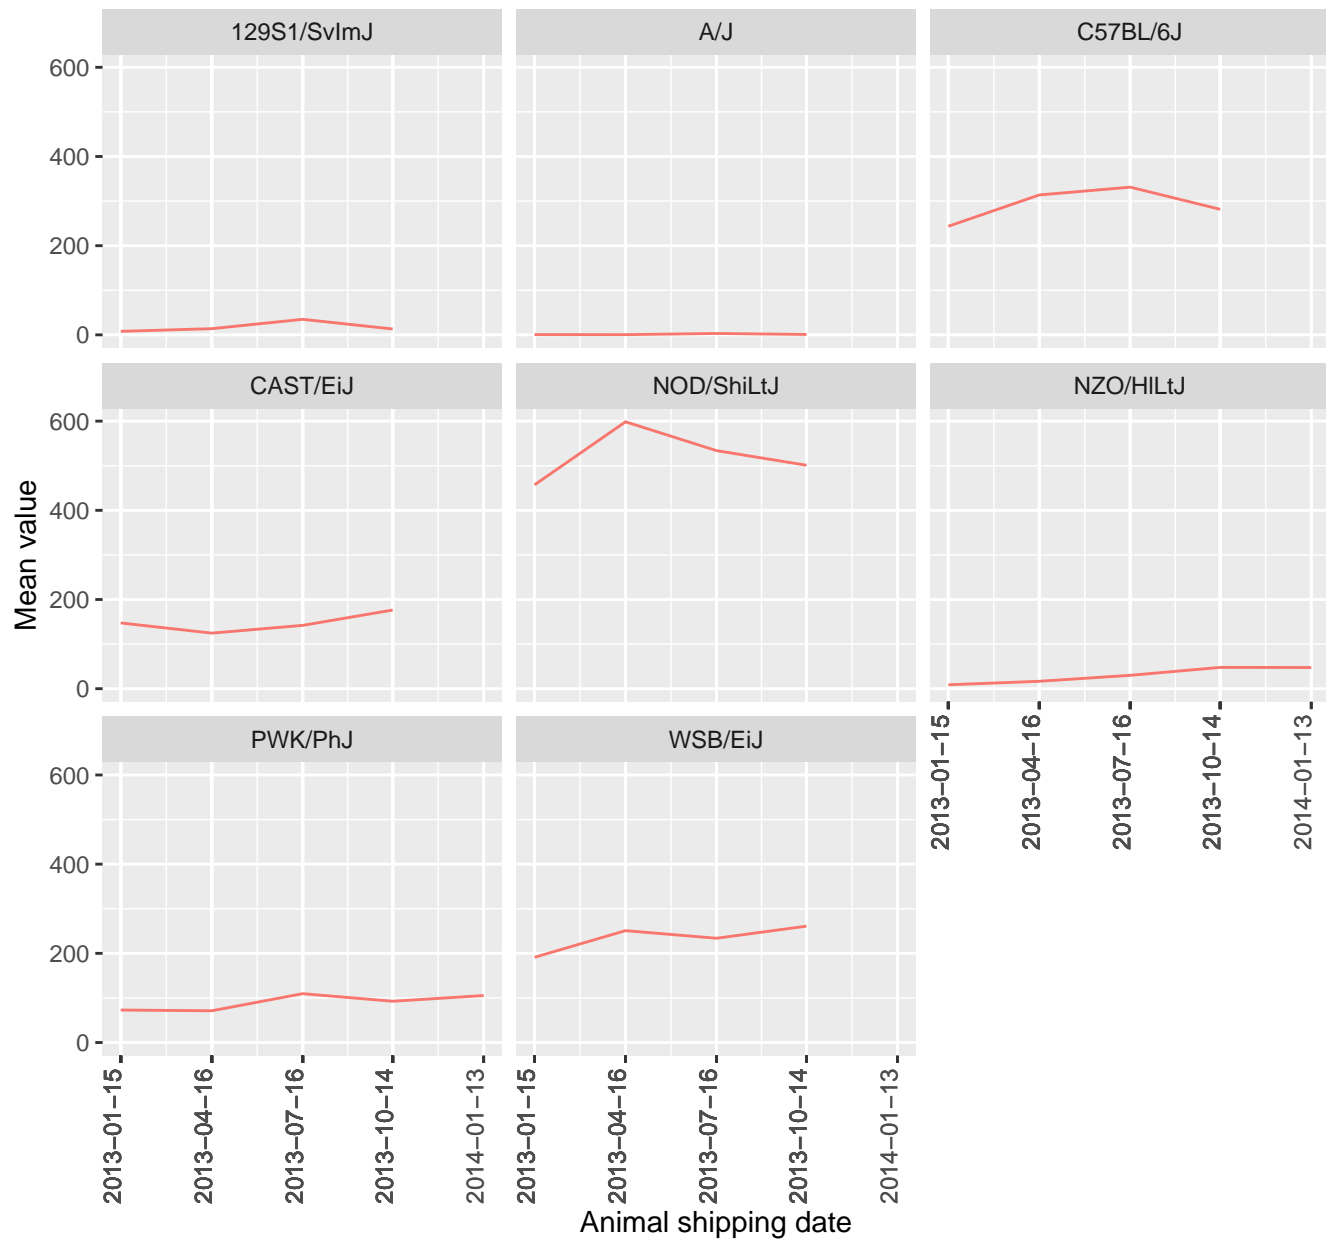

Procedure: GMC01  
Parameter: center\_latency

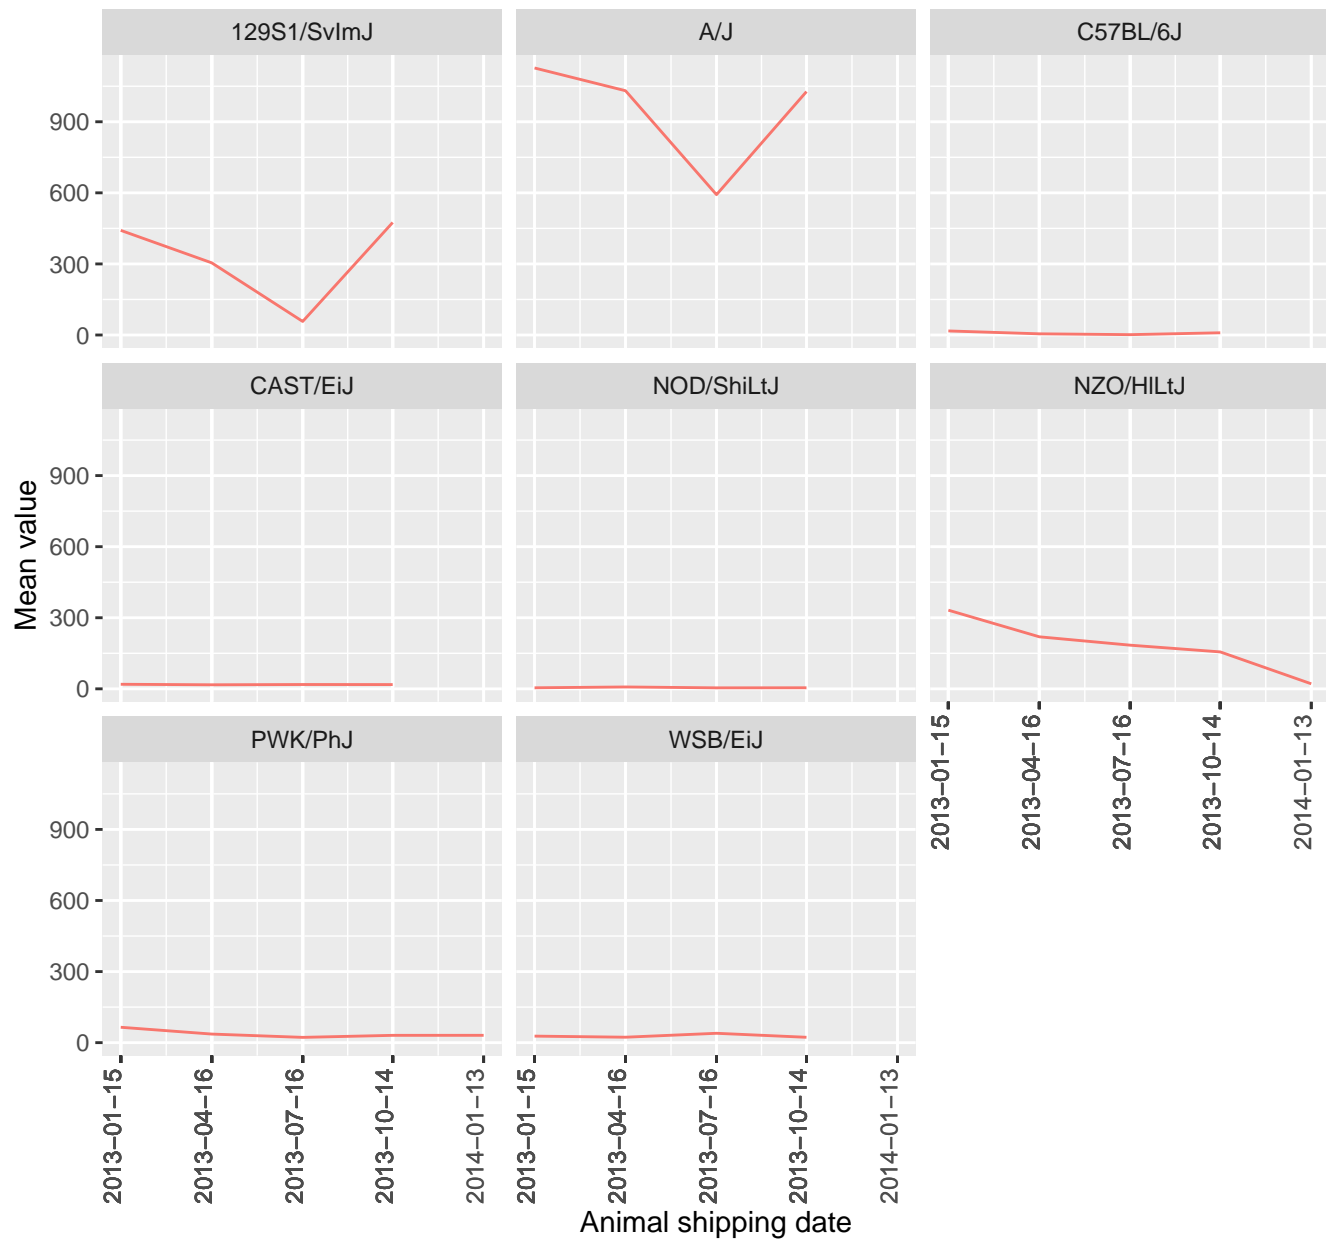



Procedure: GMC01

Parameter: center\_permanence

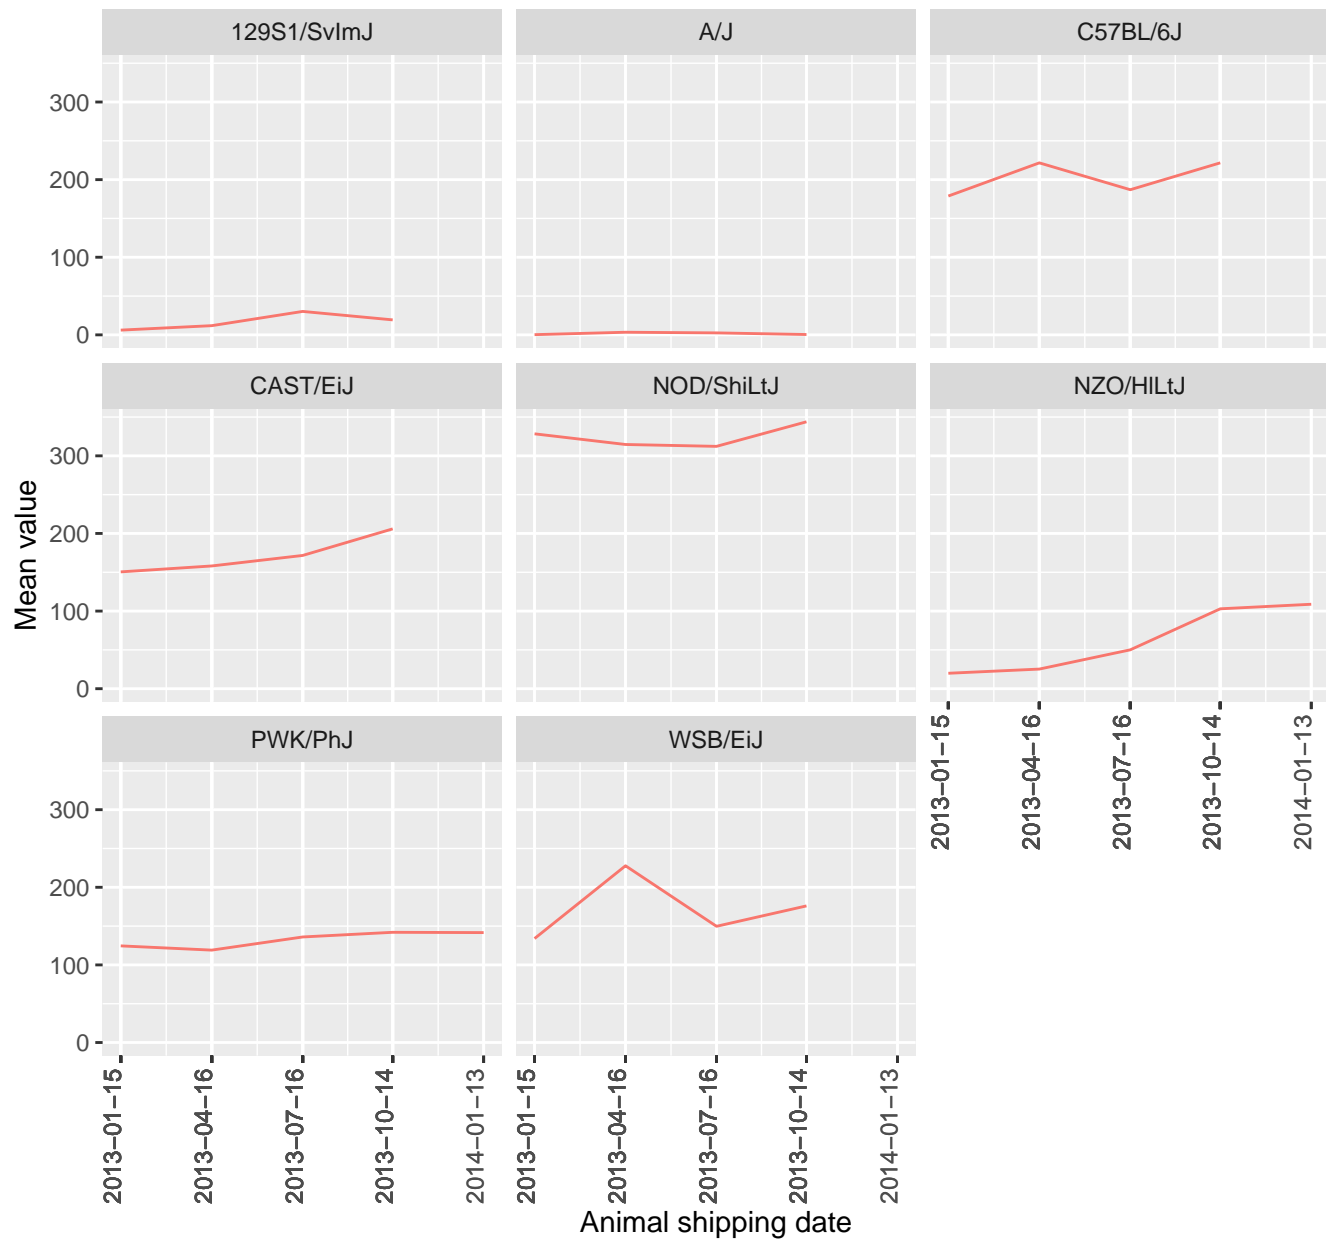

Procedure: GMC01  
Parameter: center\_rest

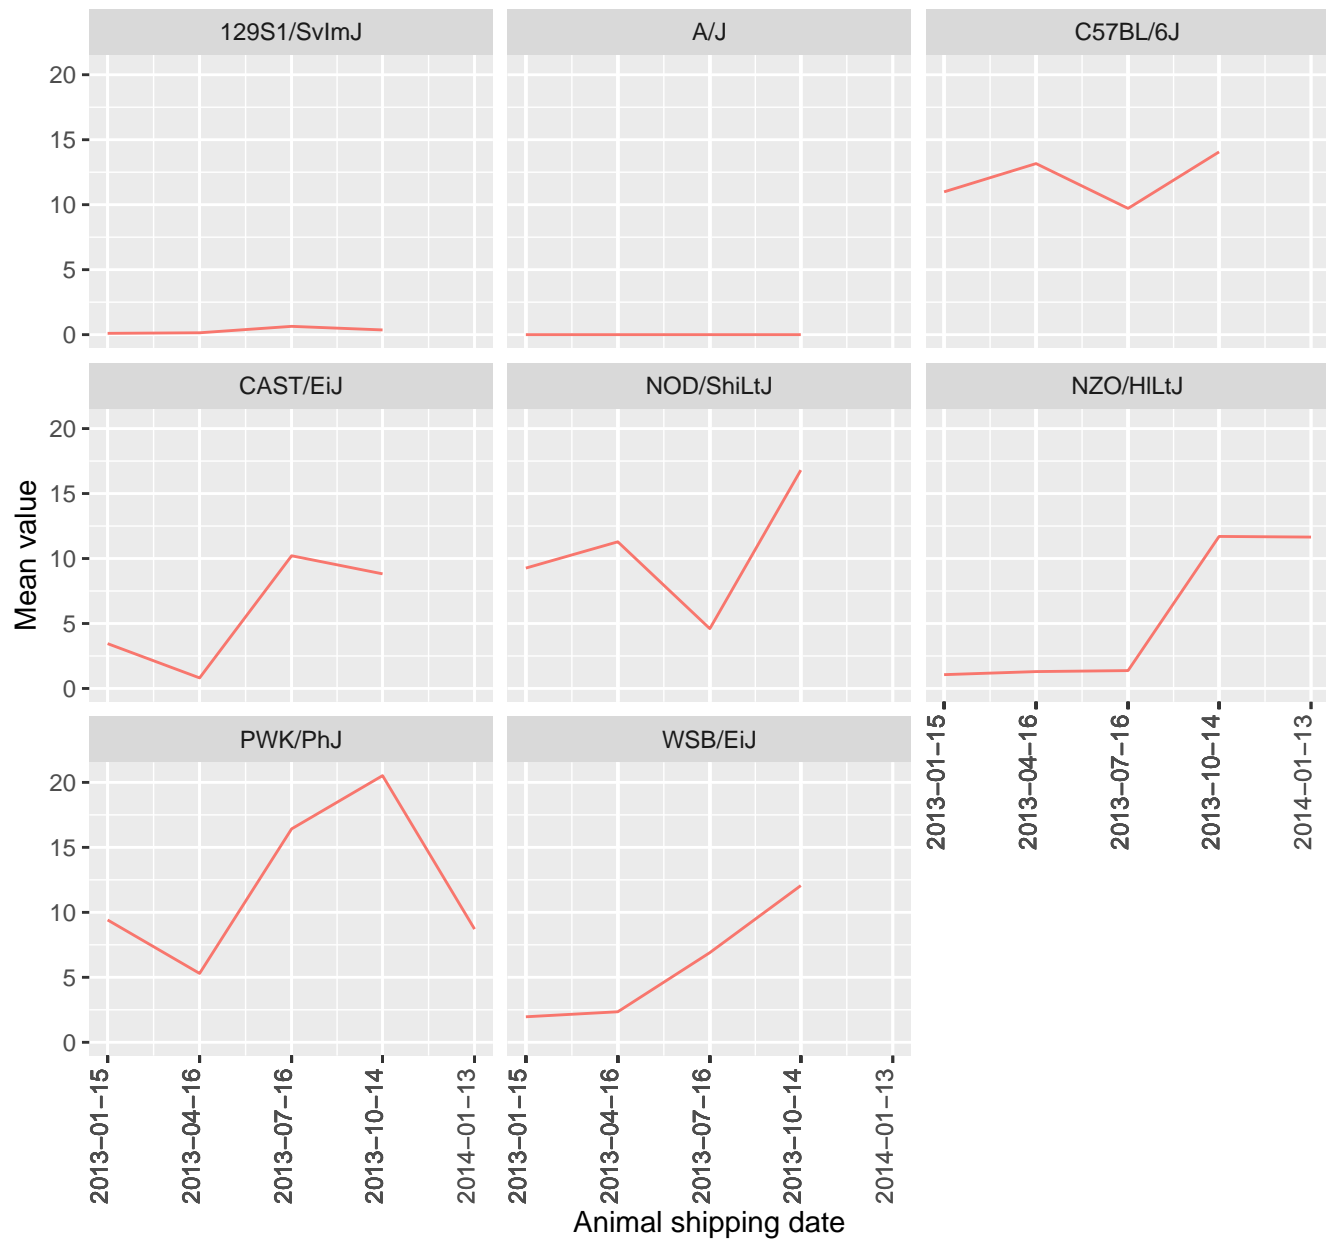

Procedure: GMC01  
Parameter: center\_speed

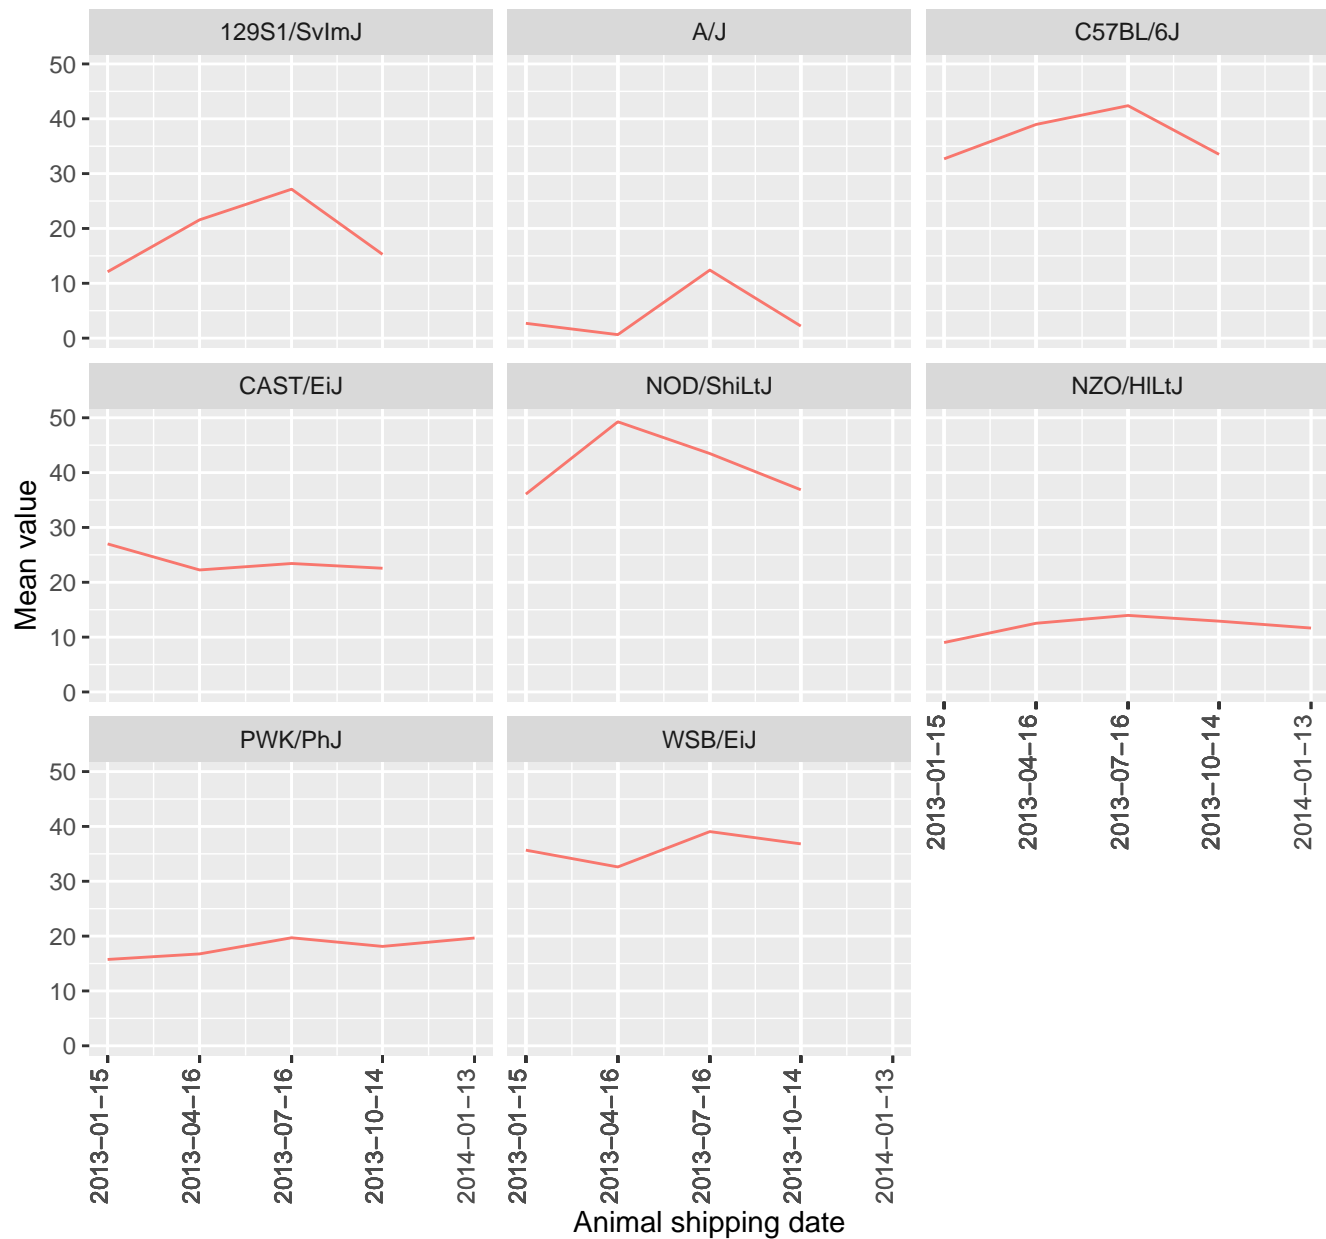

Procedure: GMC01

Parameter: center\_time\_1

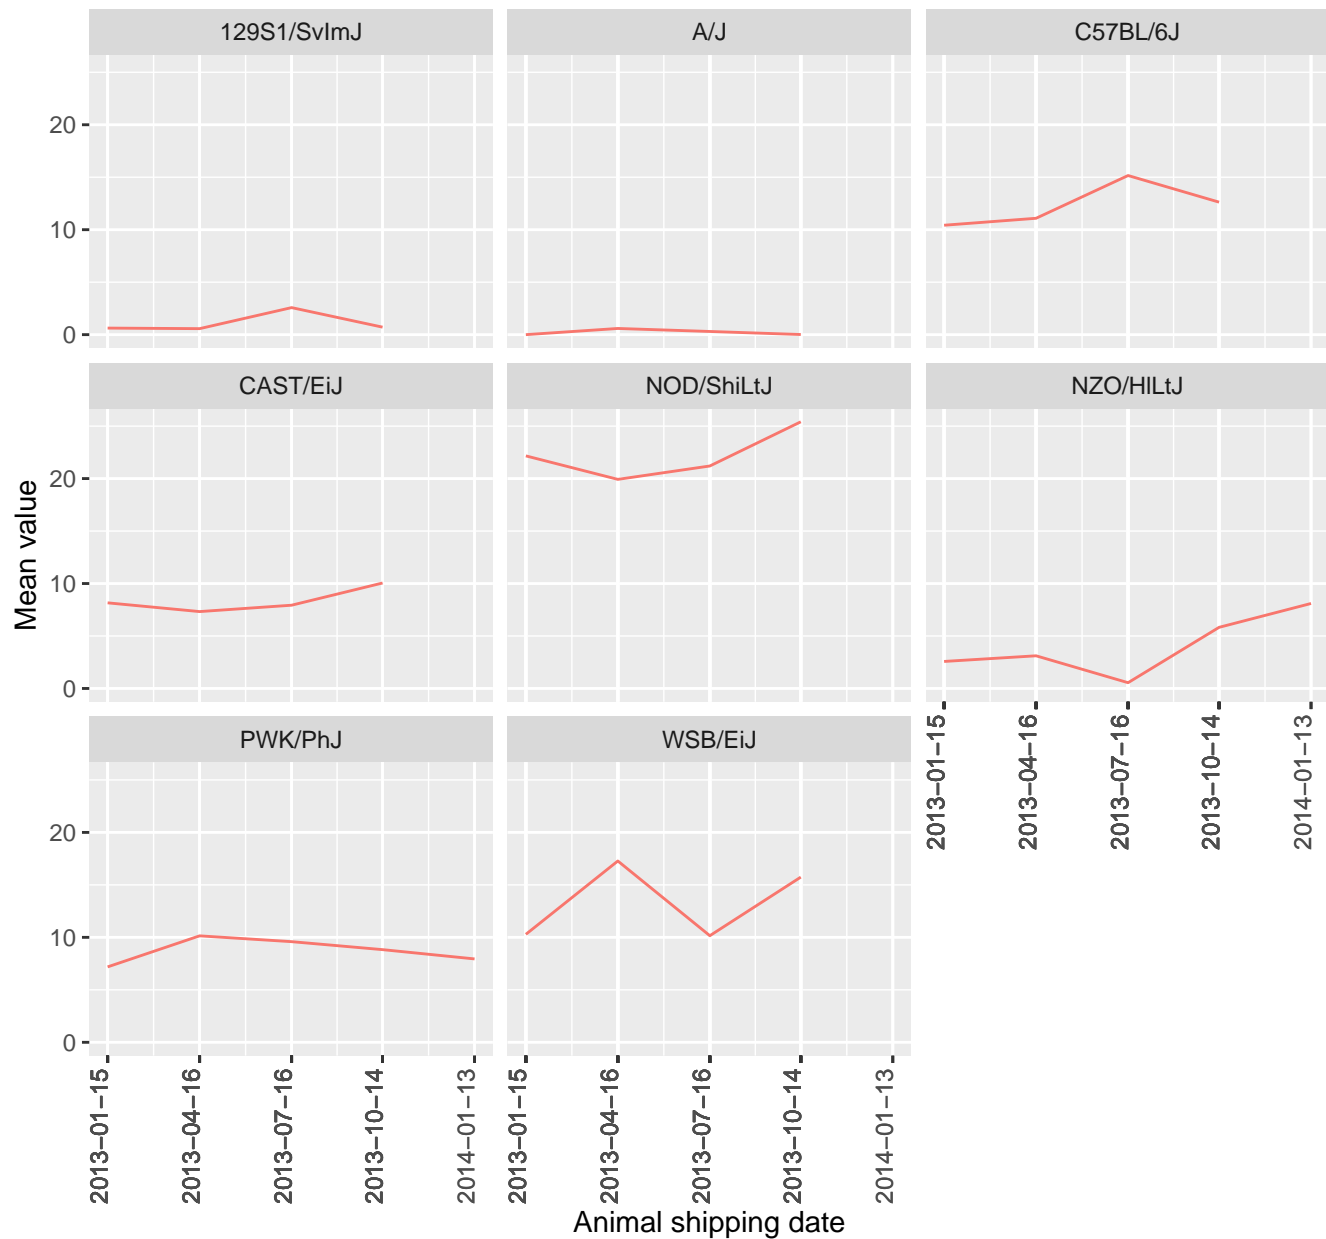

Procedure: GMC01

Parameter: center\_time\_2

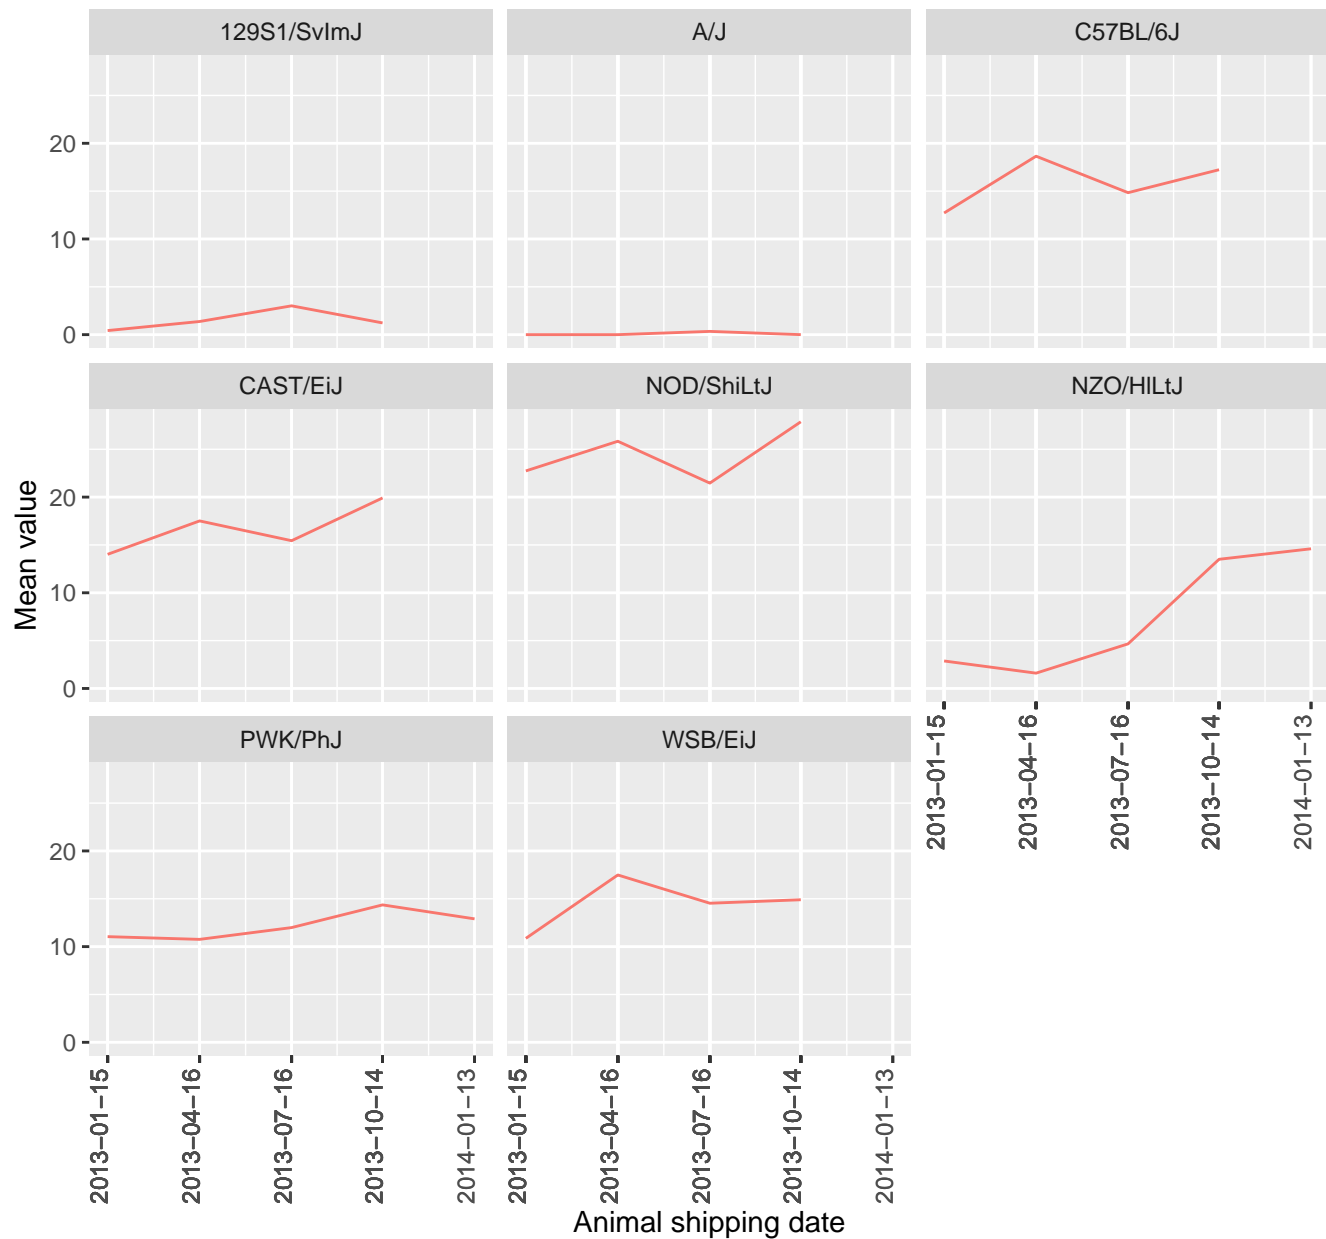

Procedure: GMC01

Parameter: center\_time\_3

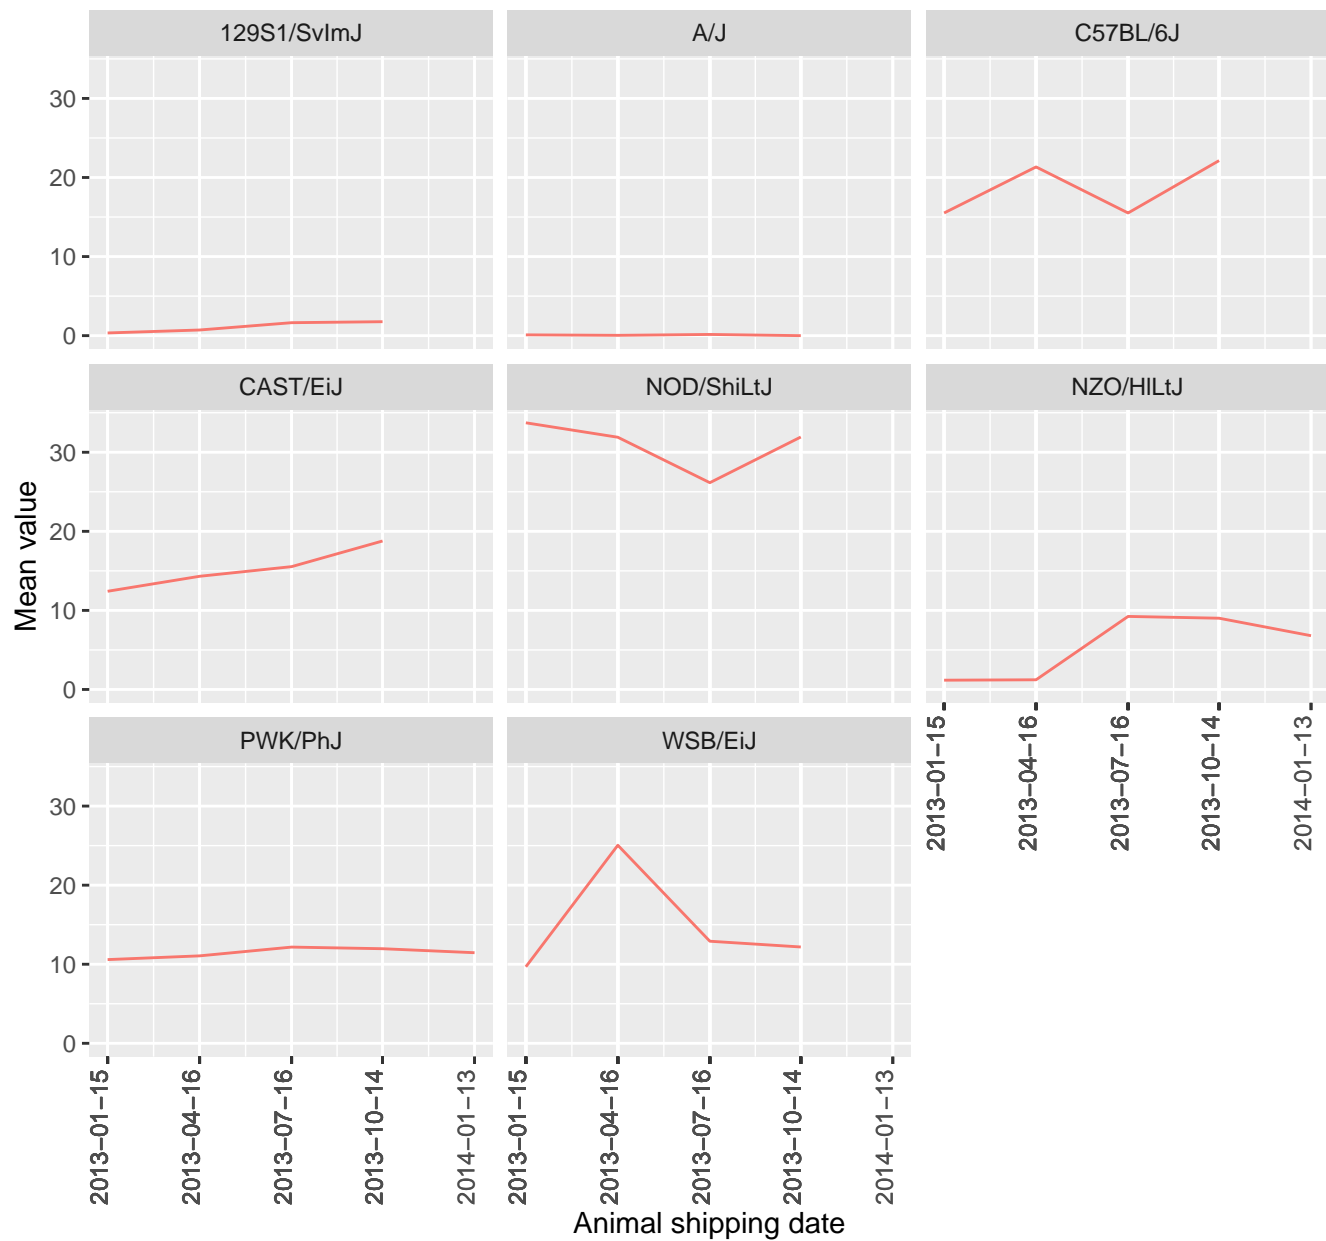

Procedure: GMC01  
Parameter: center\_time\_4

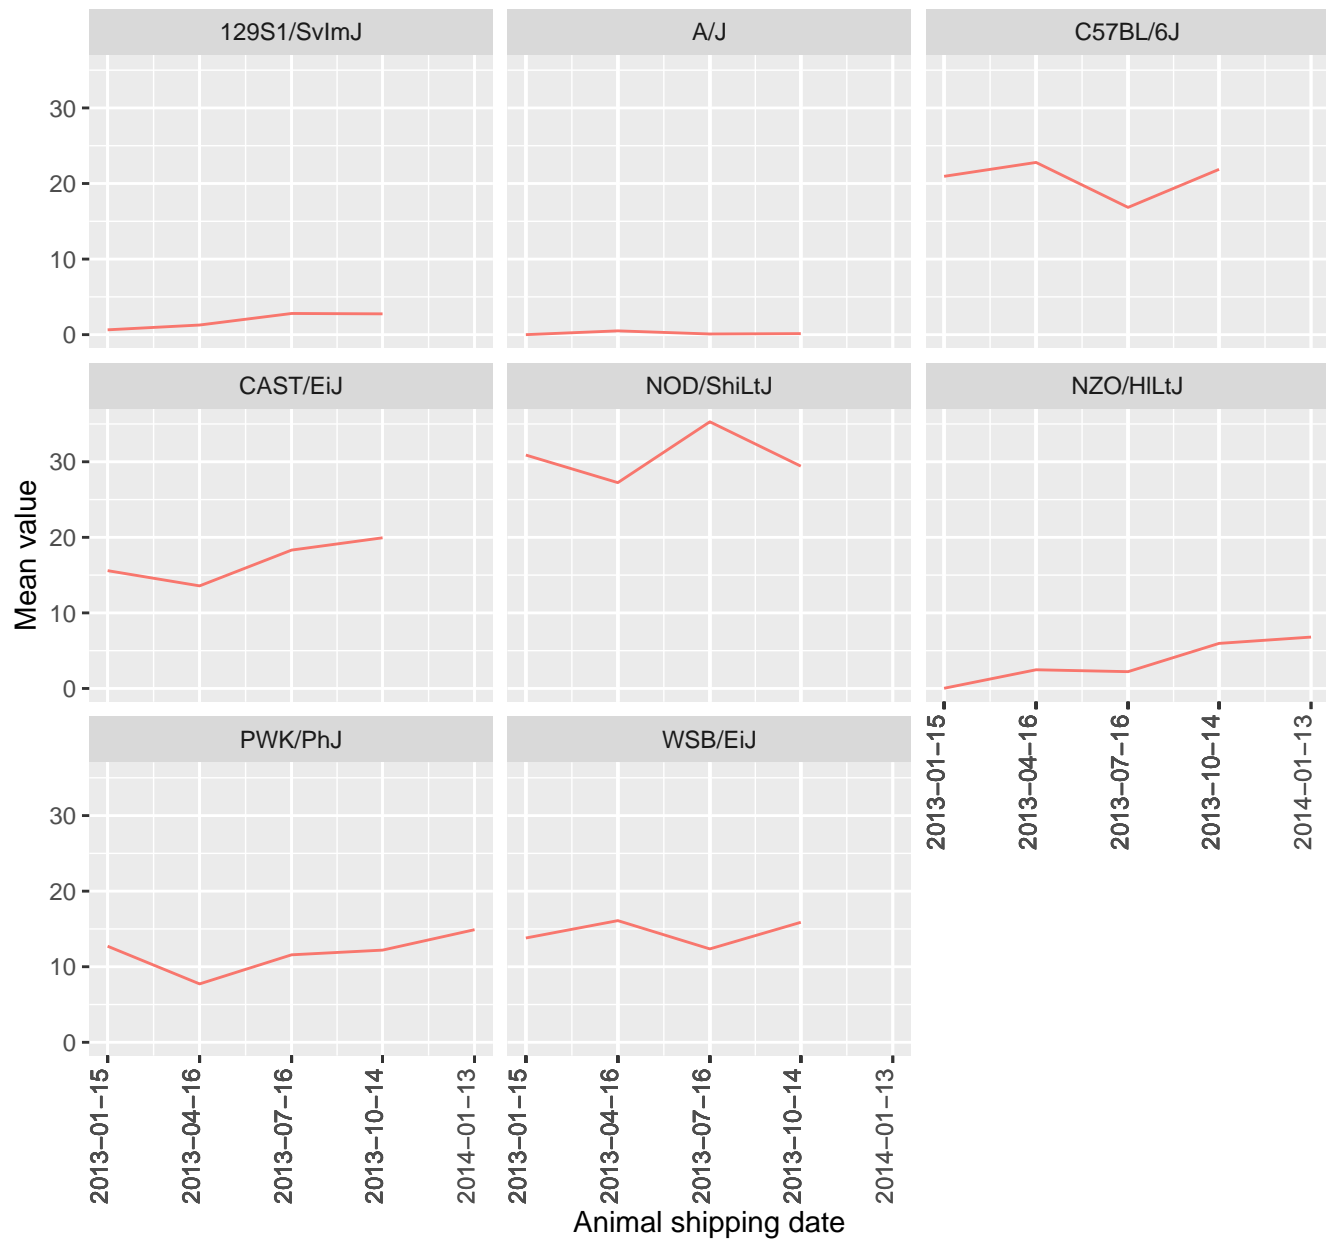

Procedure: GMC01

Parameter: center\_time\_total

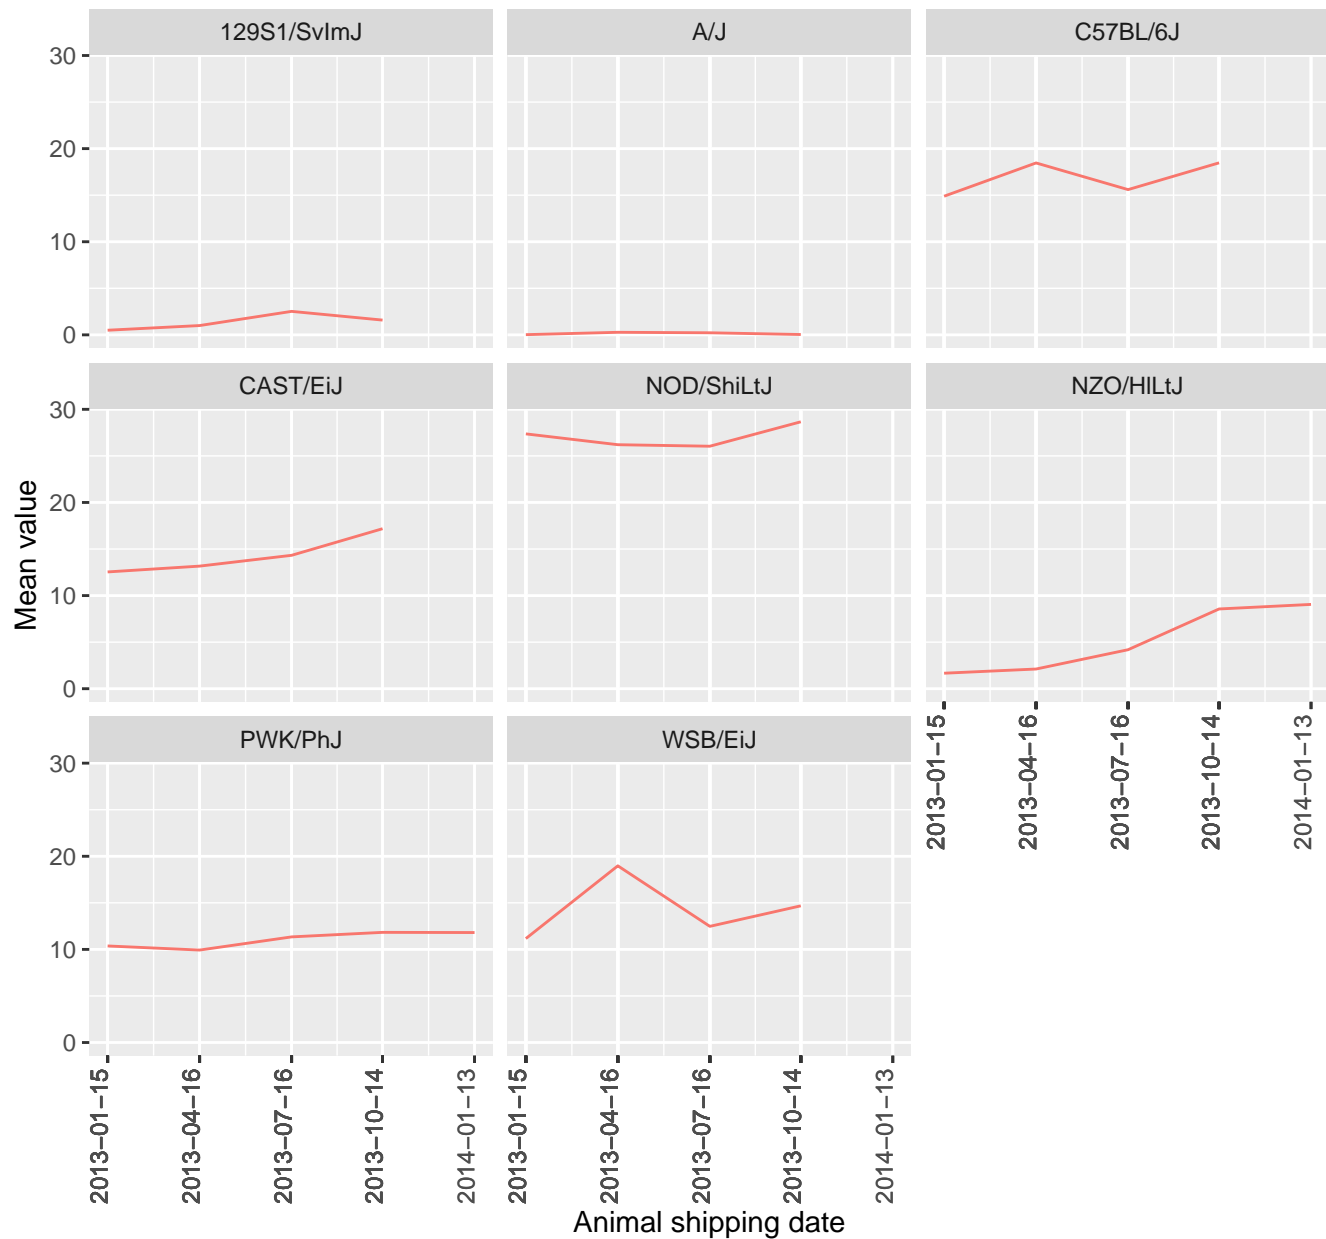



Procedure: GMC01  
Parameter: distance\_1

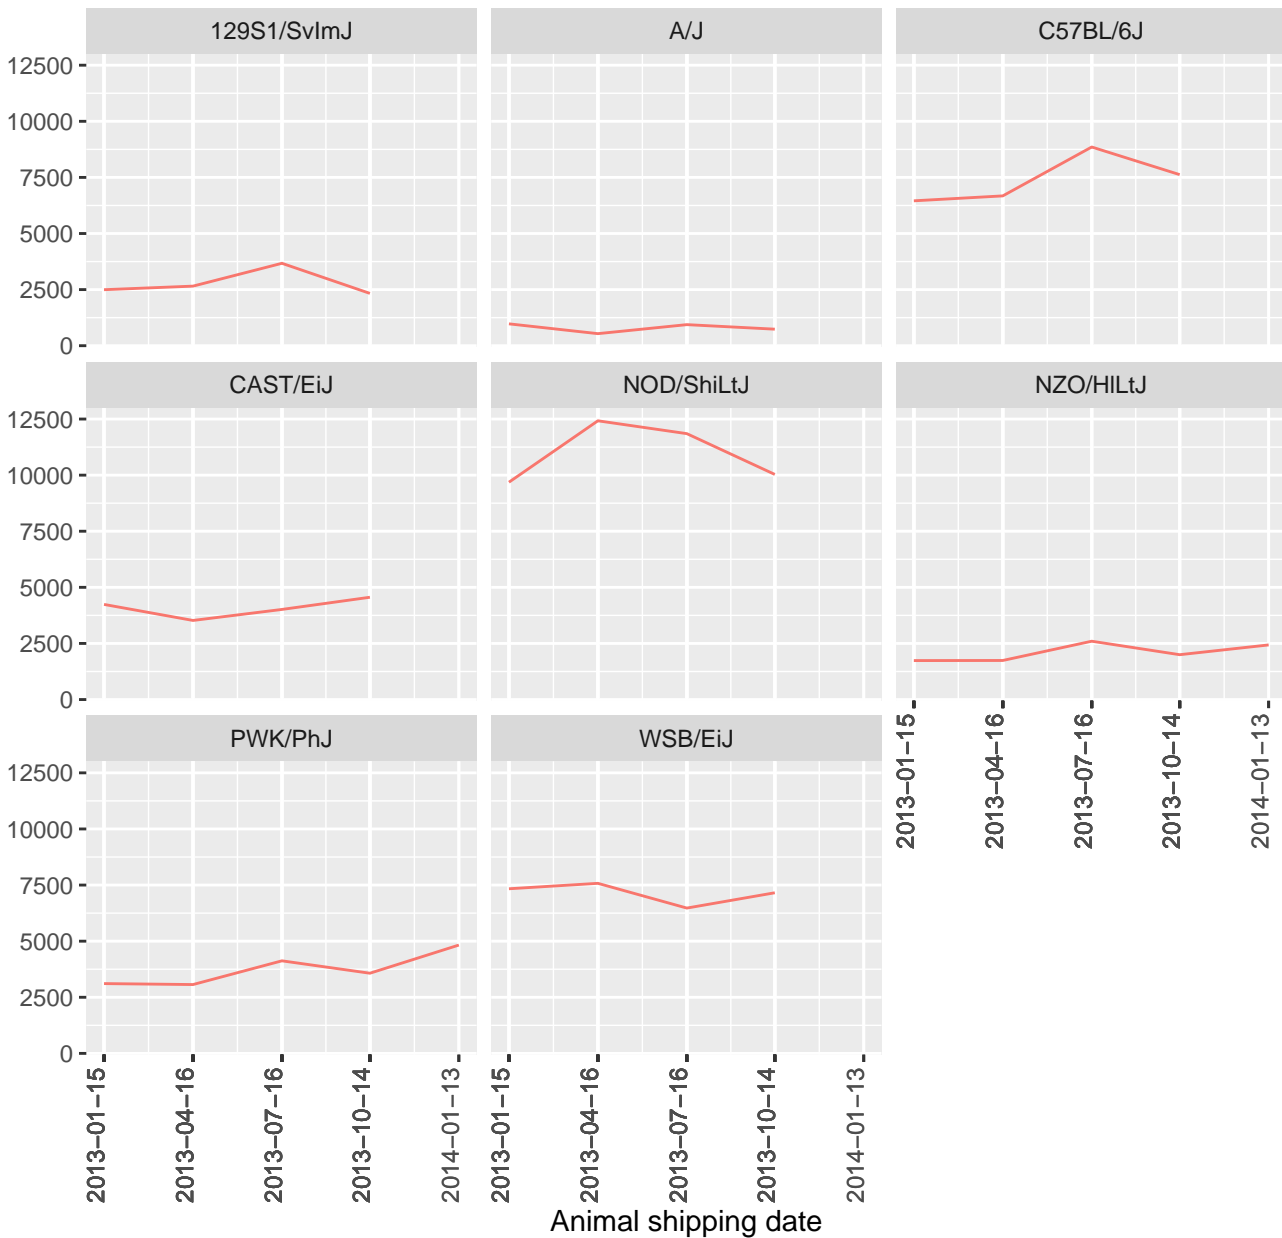

Procedure: GMC01  
Parameter: distance\_2

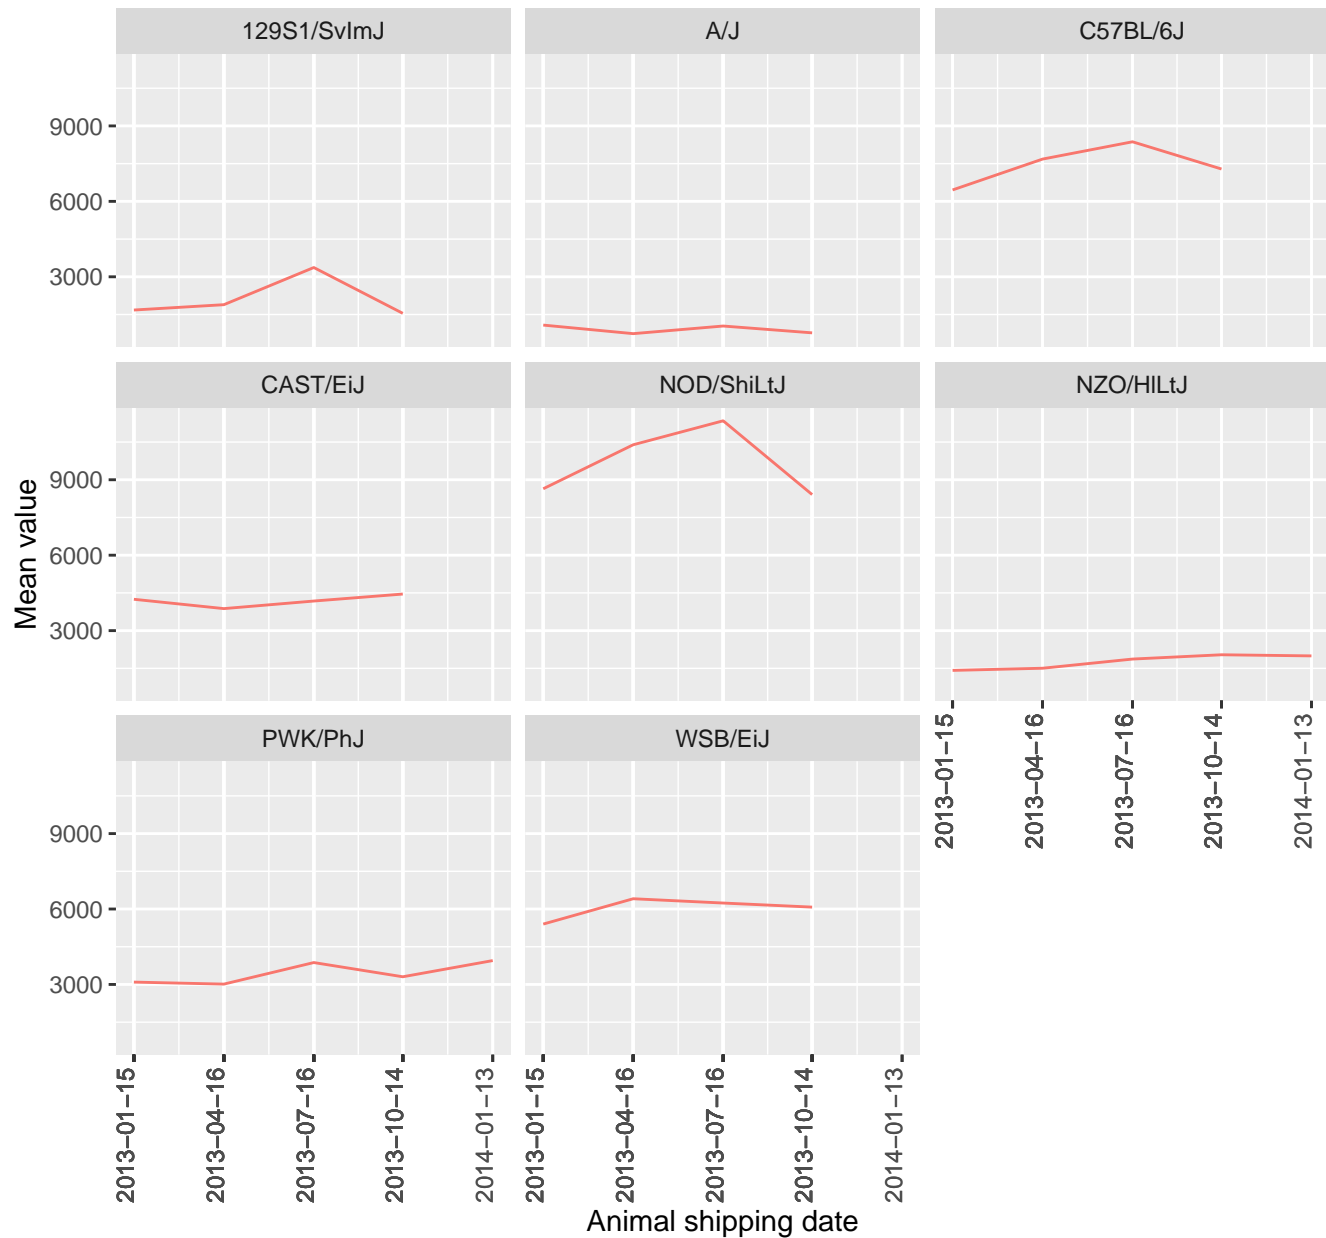

Procedure: GMC01  
Parameter: distance\_3

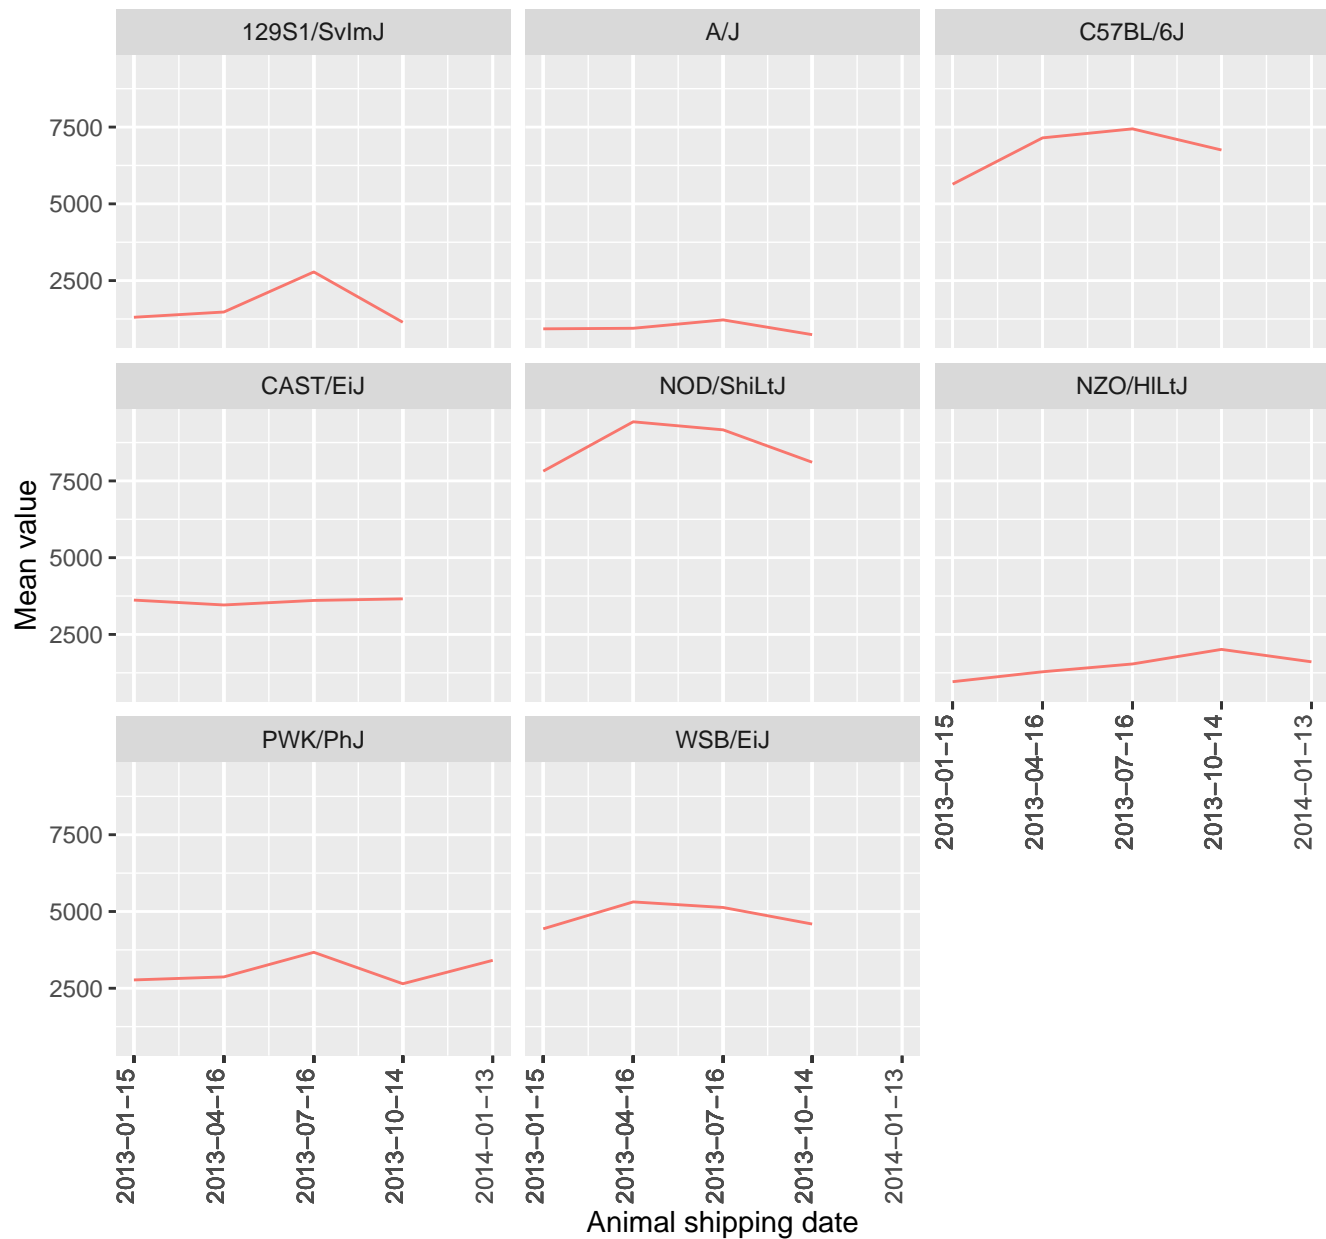

Procedure: GMC01  
Parameter: distance\_4

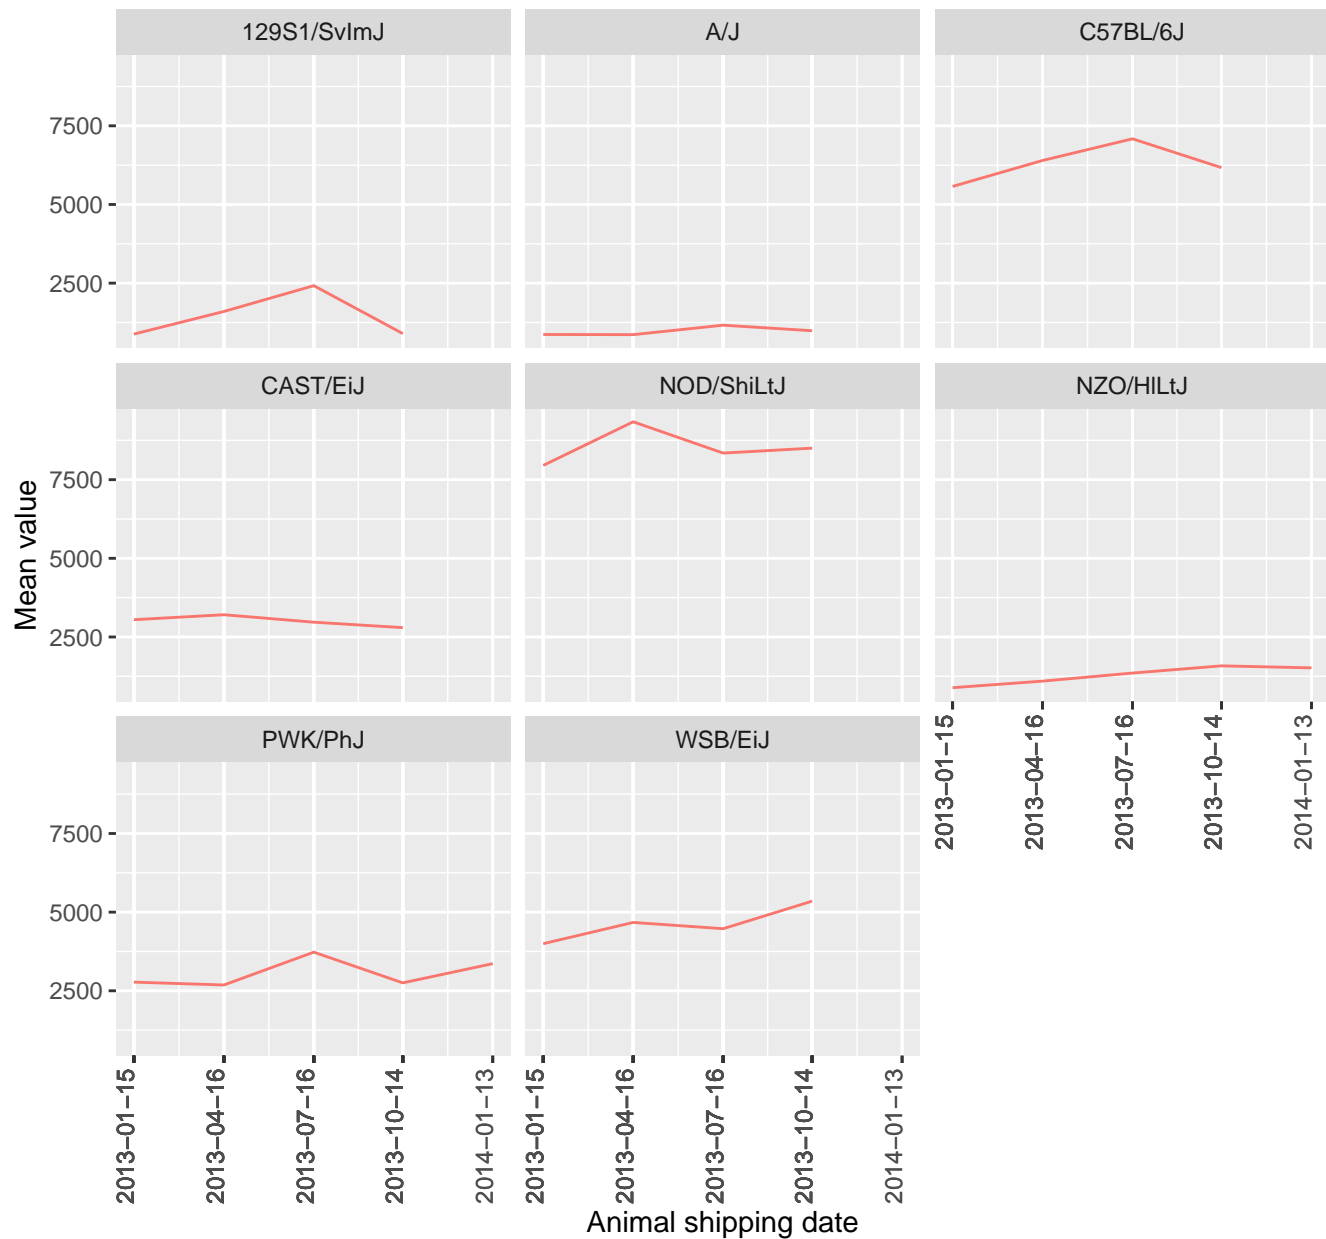

Procedure: GMC01  
Parameter: distance\_total

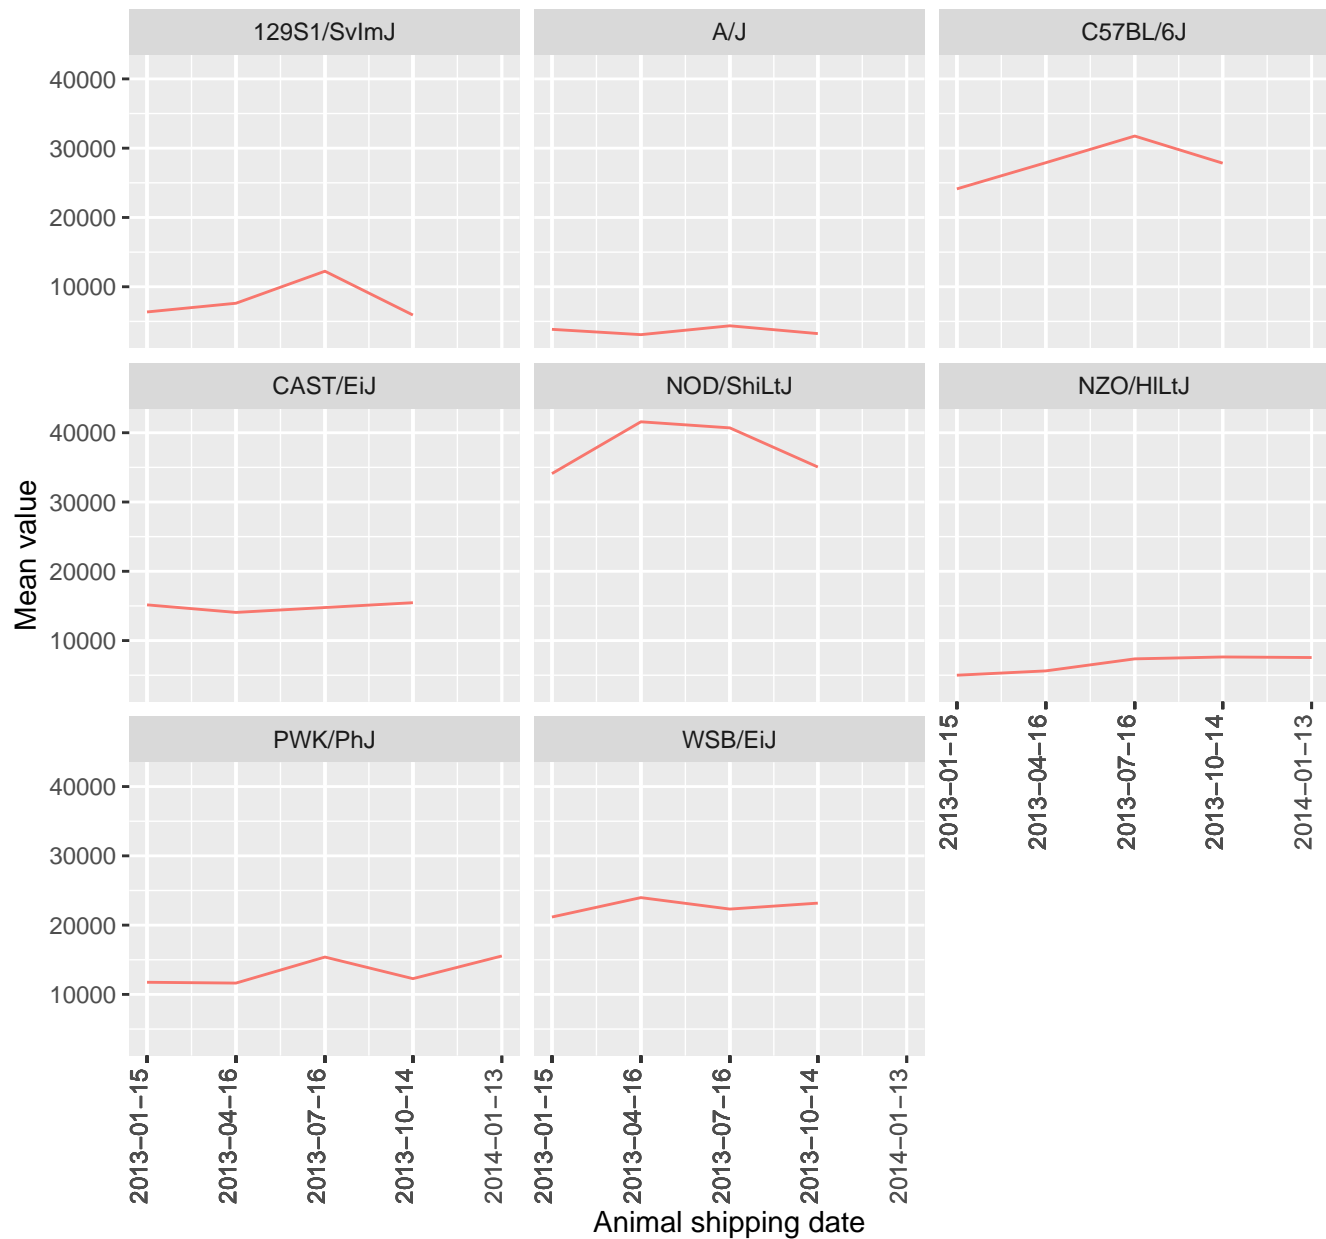

# Procedure: GMC01

Parameter: periphery\_distance

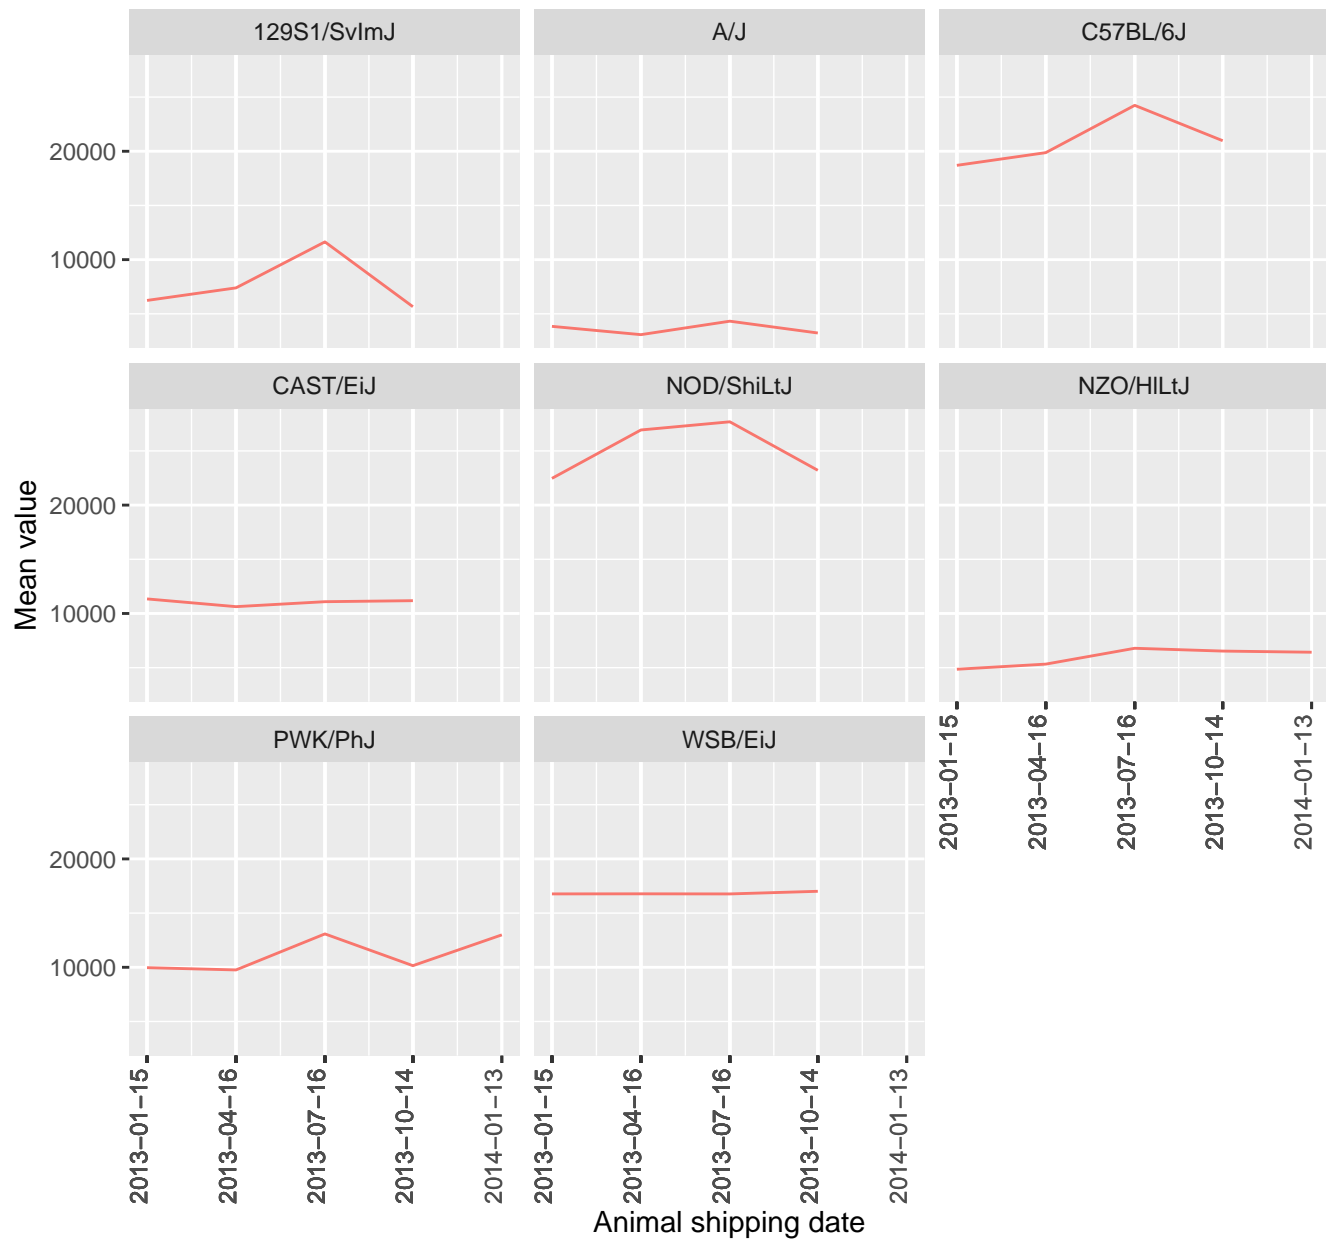

Procedure: GMC01

Parameter: periphery\_permanence

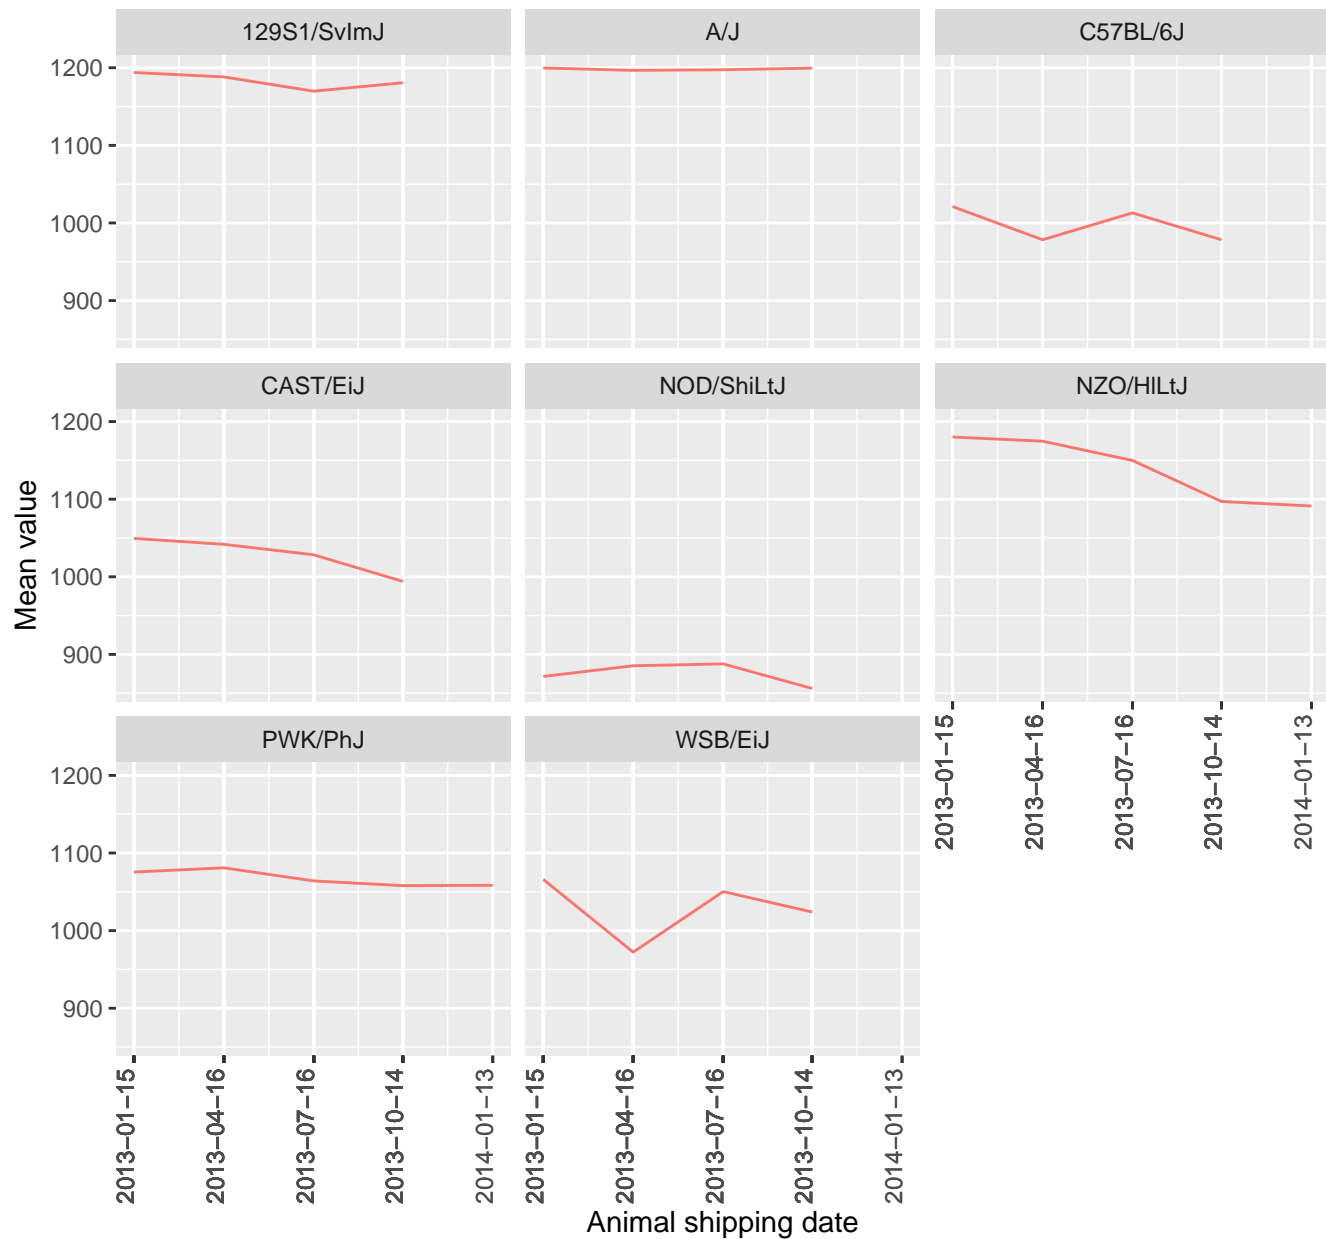

Procedure: GMC01  
Parameter: periphery\_rest

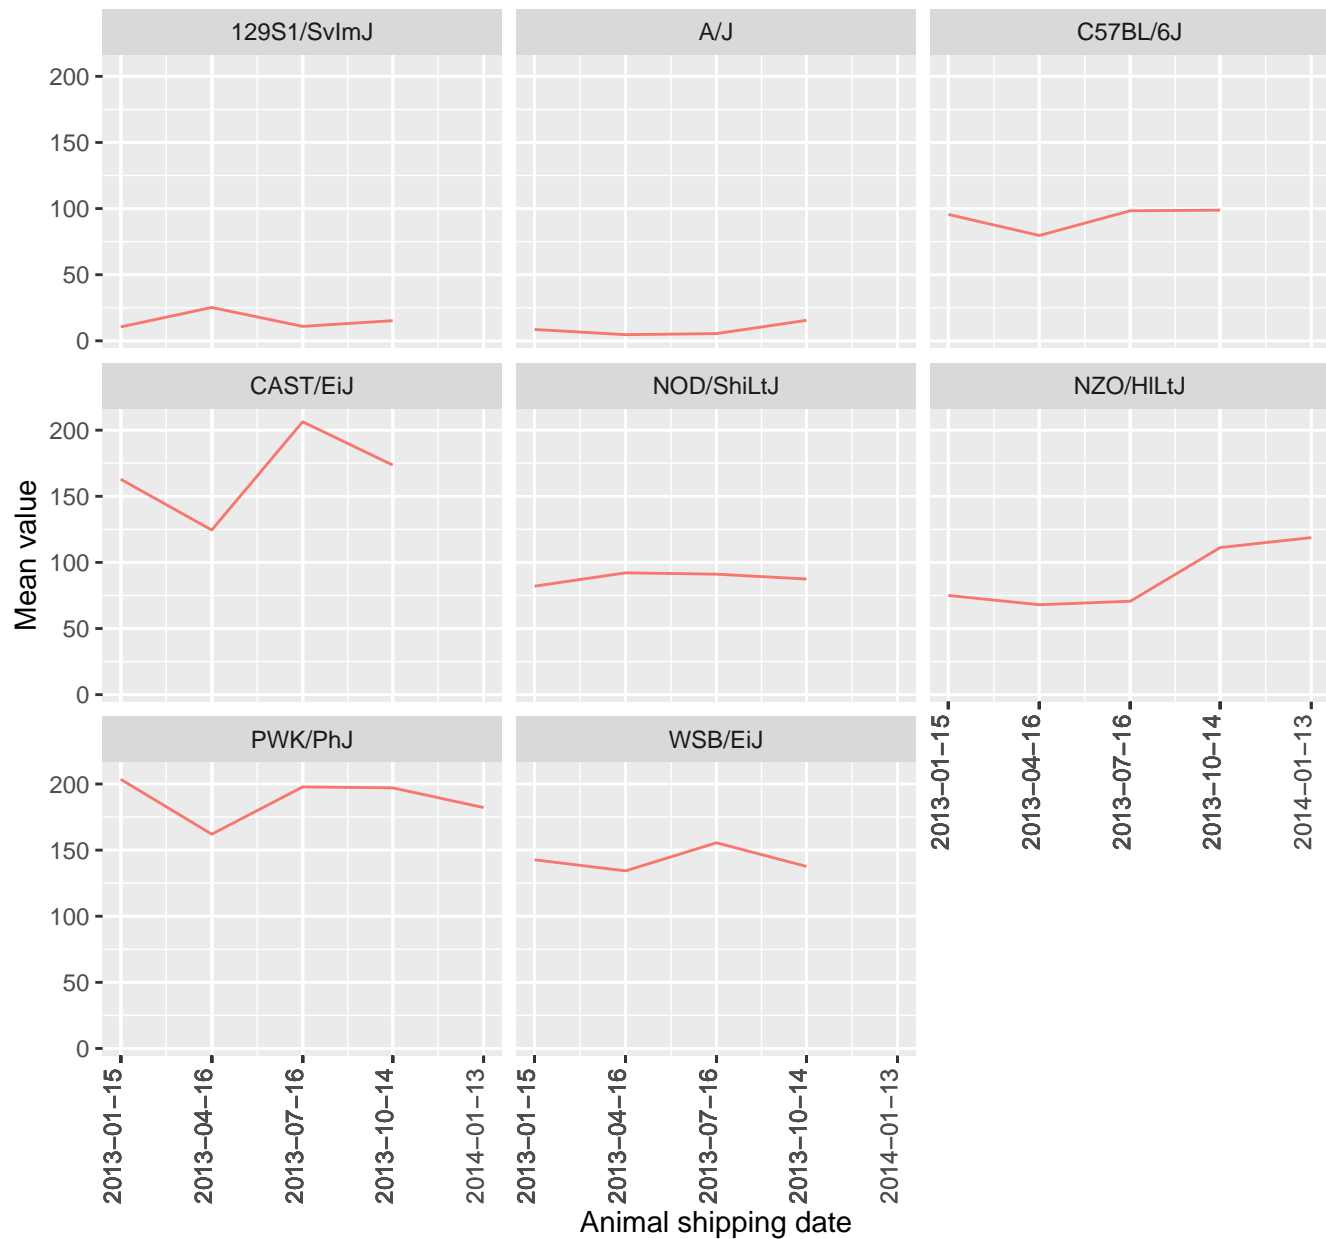



Procedure: GMC01  
Parameter: periphery\_speed

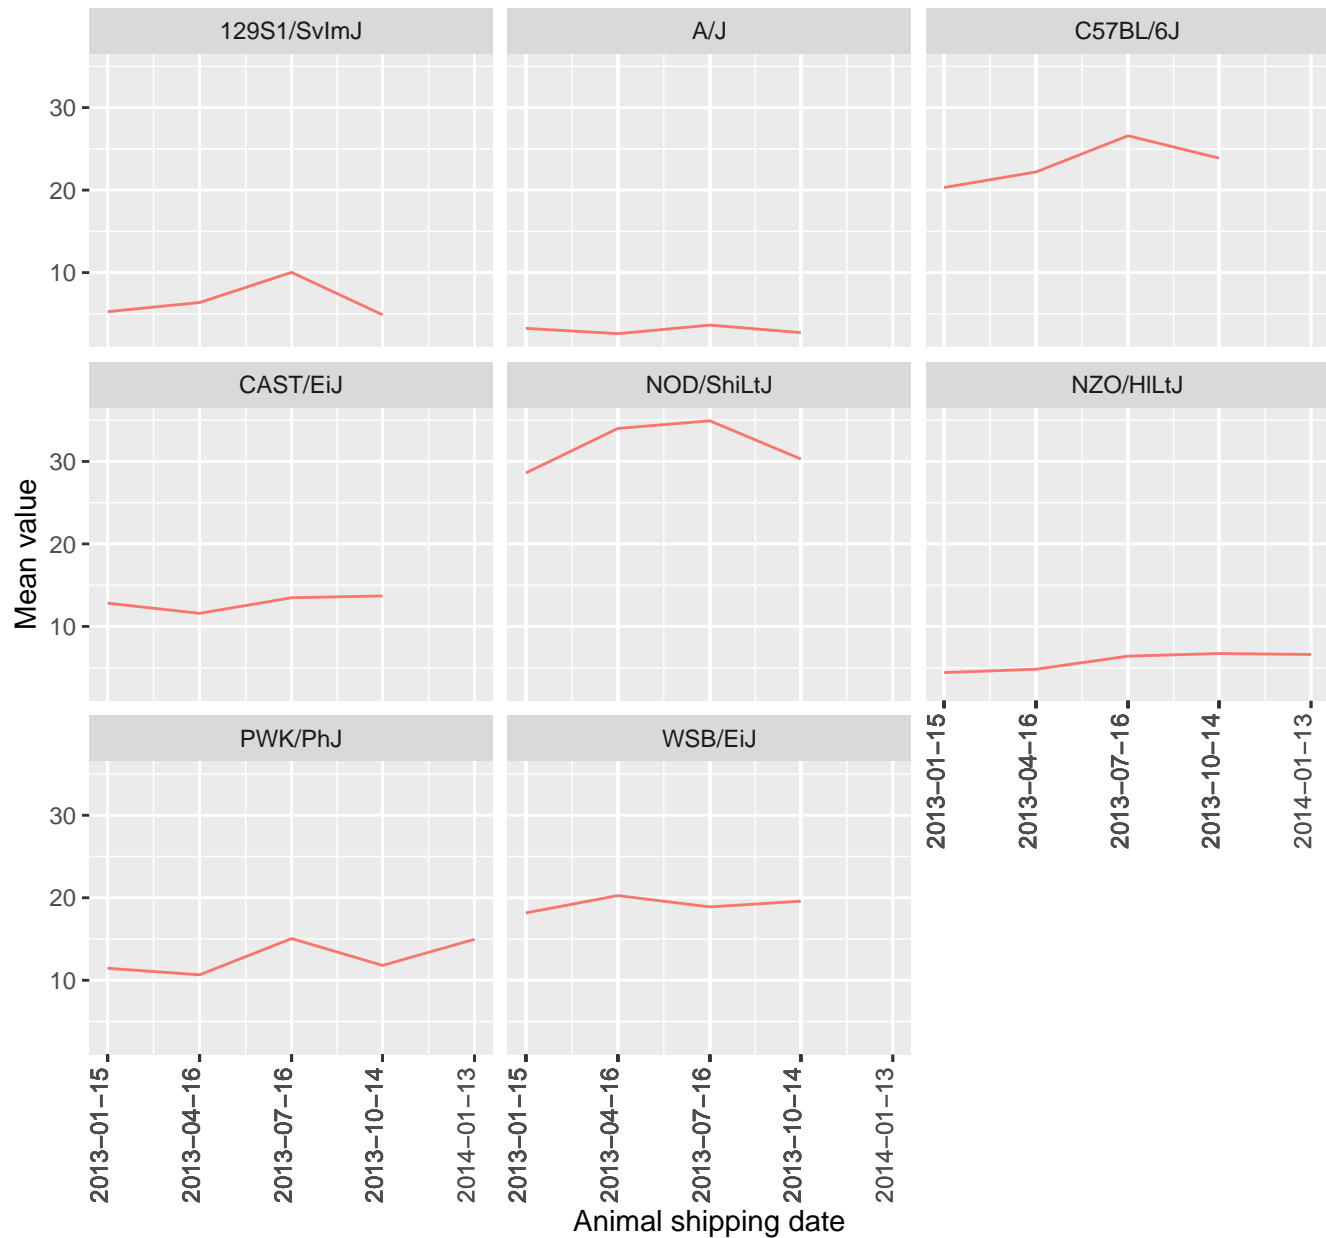

Procedure: GMC01  
Parameter: rears\_1

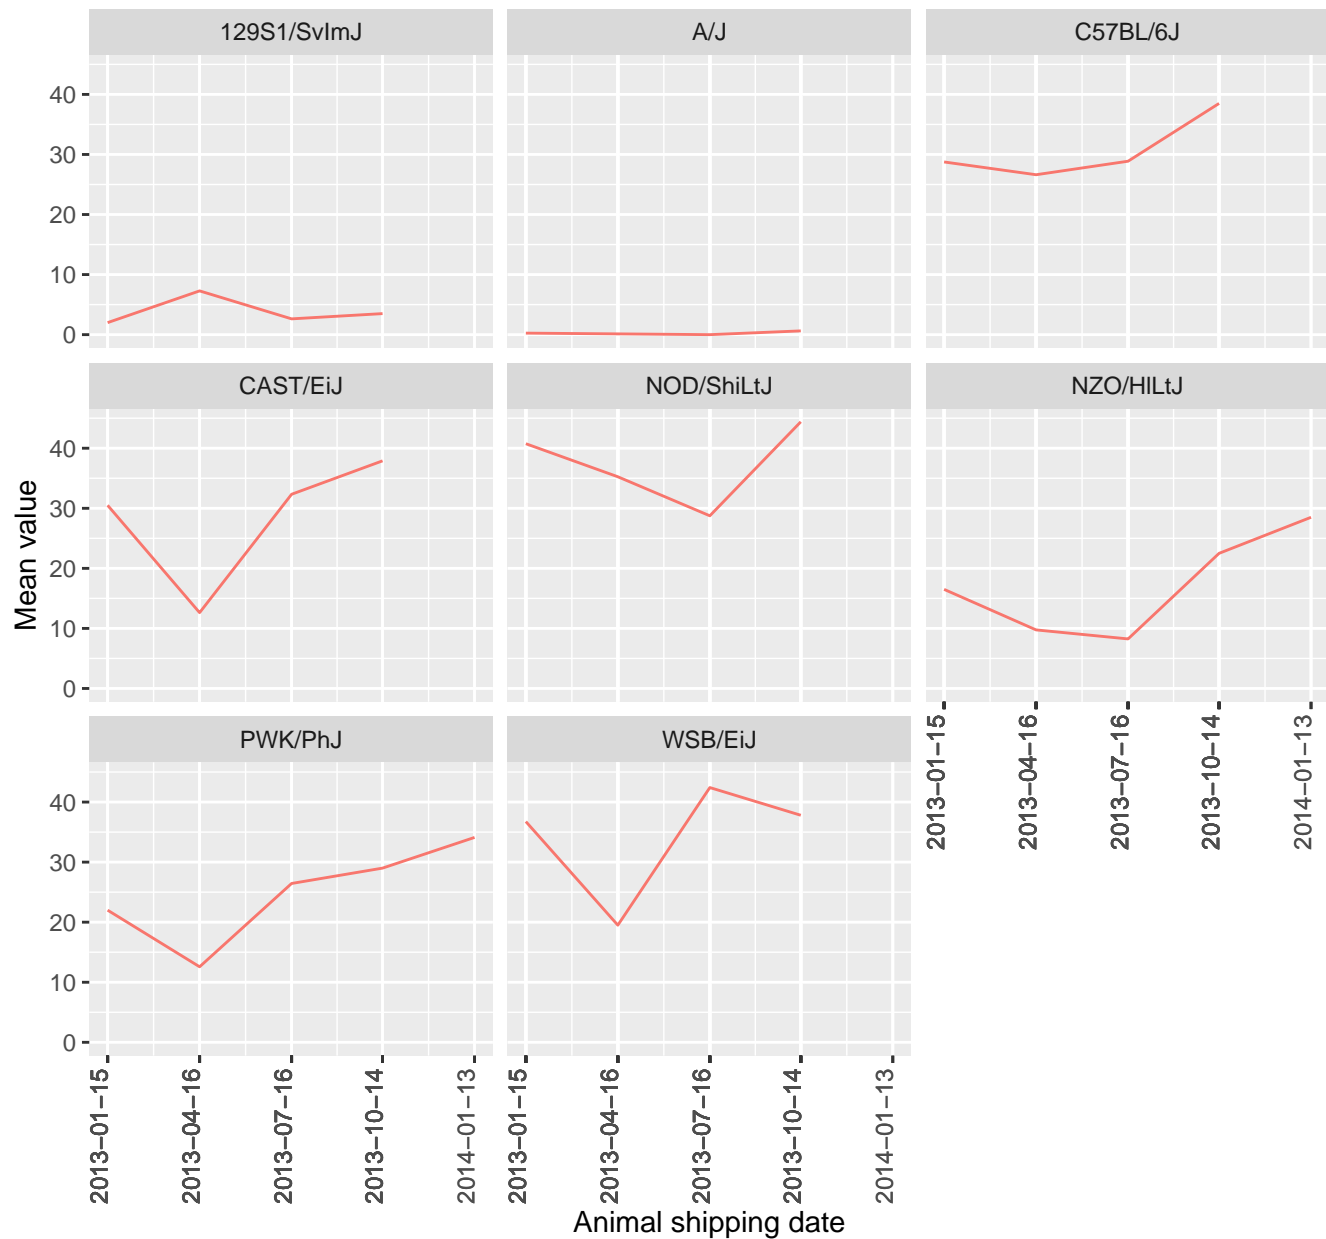

Procedure: GMC01  
Parameter: rears\_2

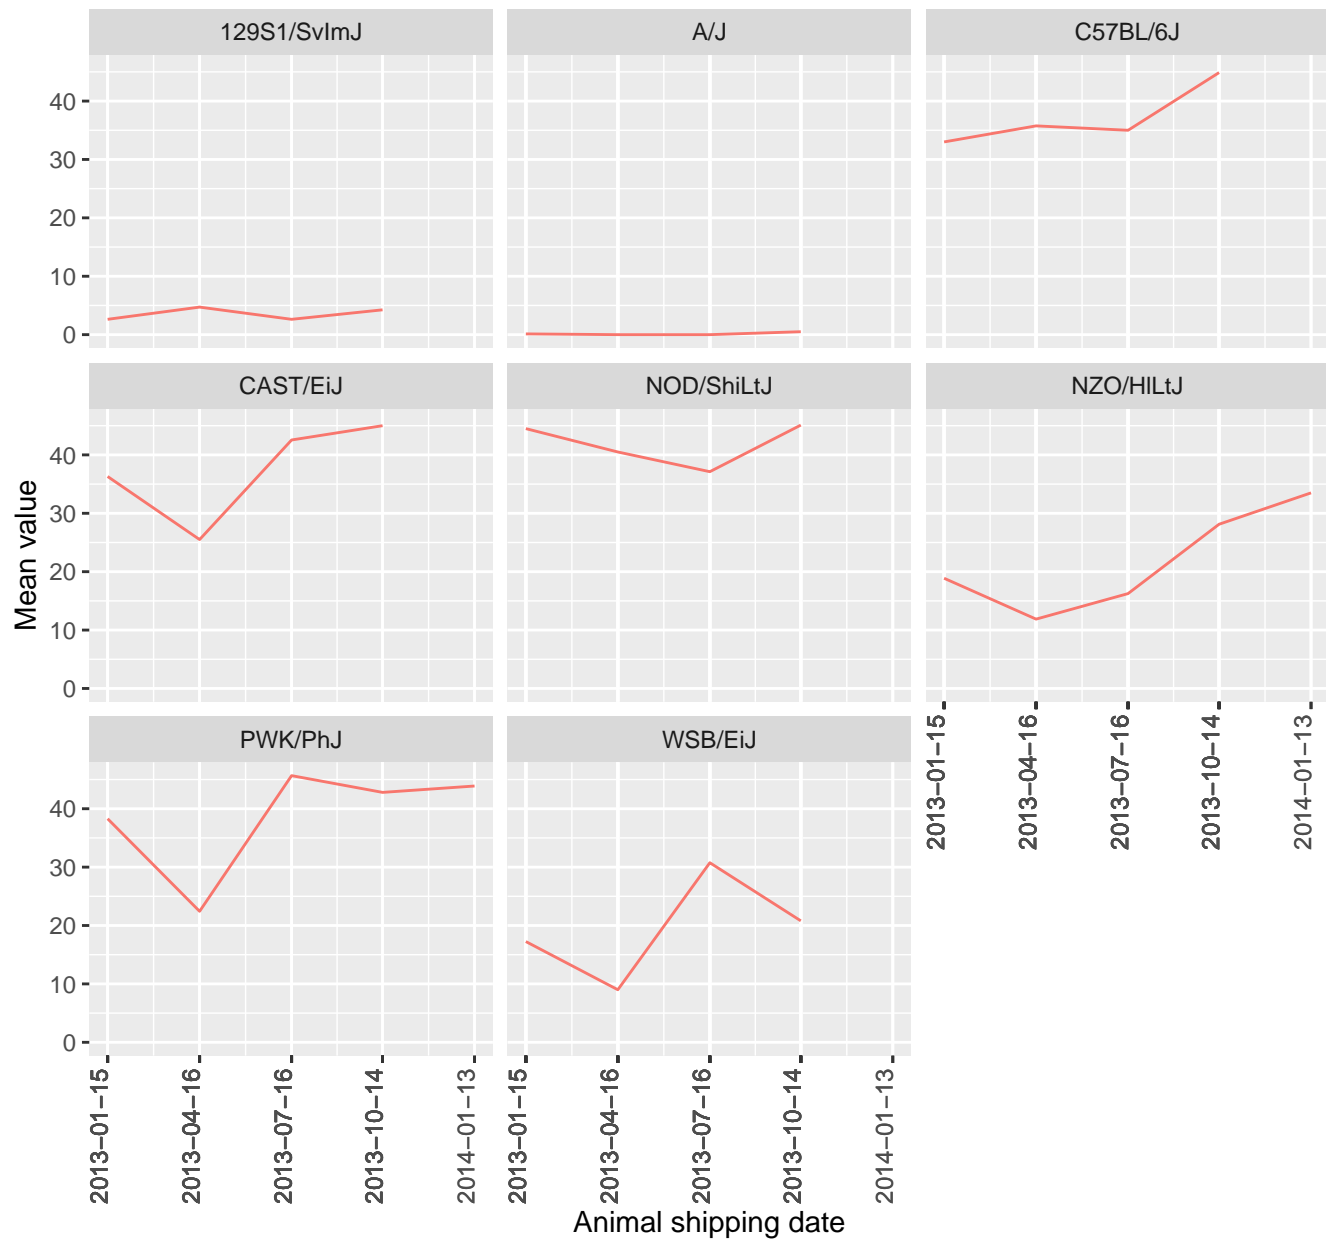

Procedure: GMC01  
Parameter: rears\_3

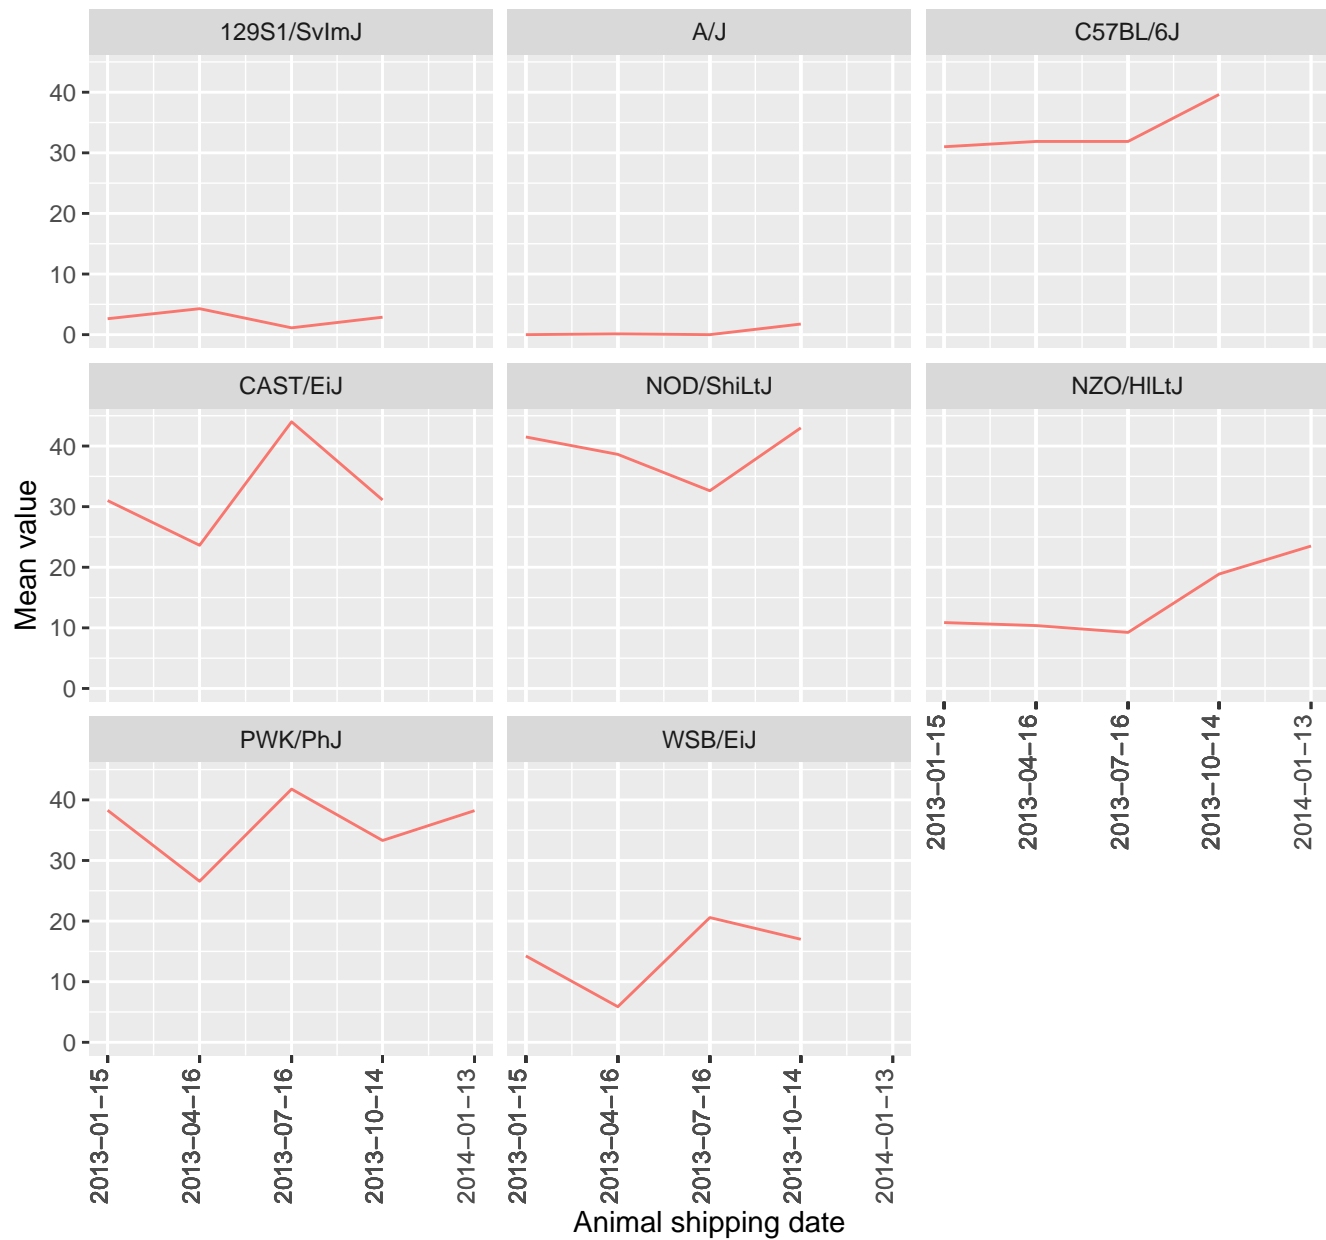

Procedure: GMC01  
Parameter: rears\_4

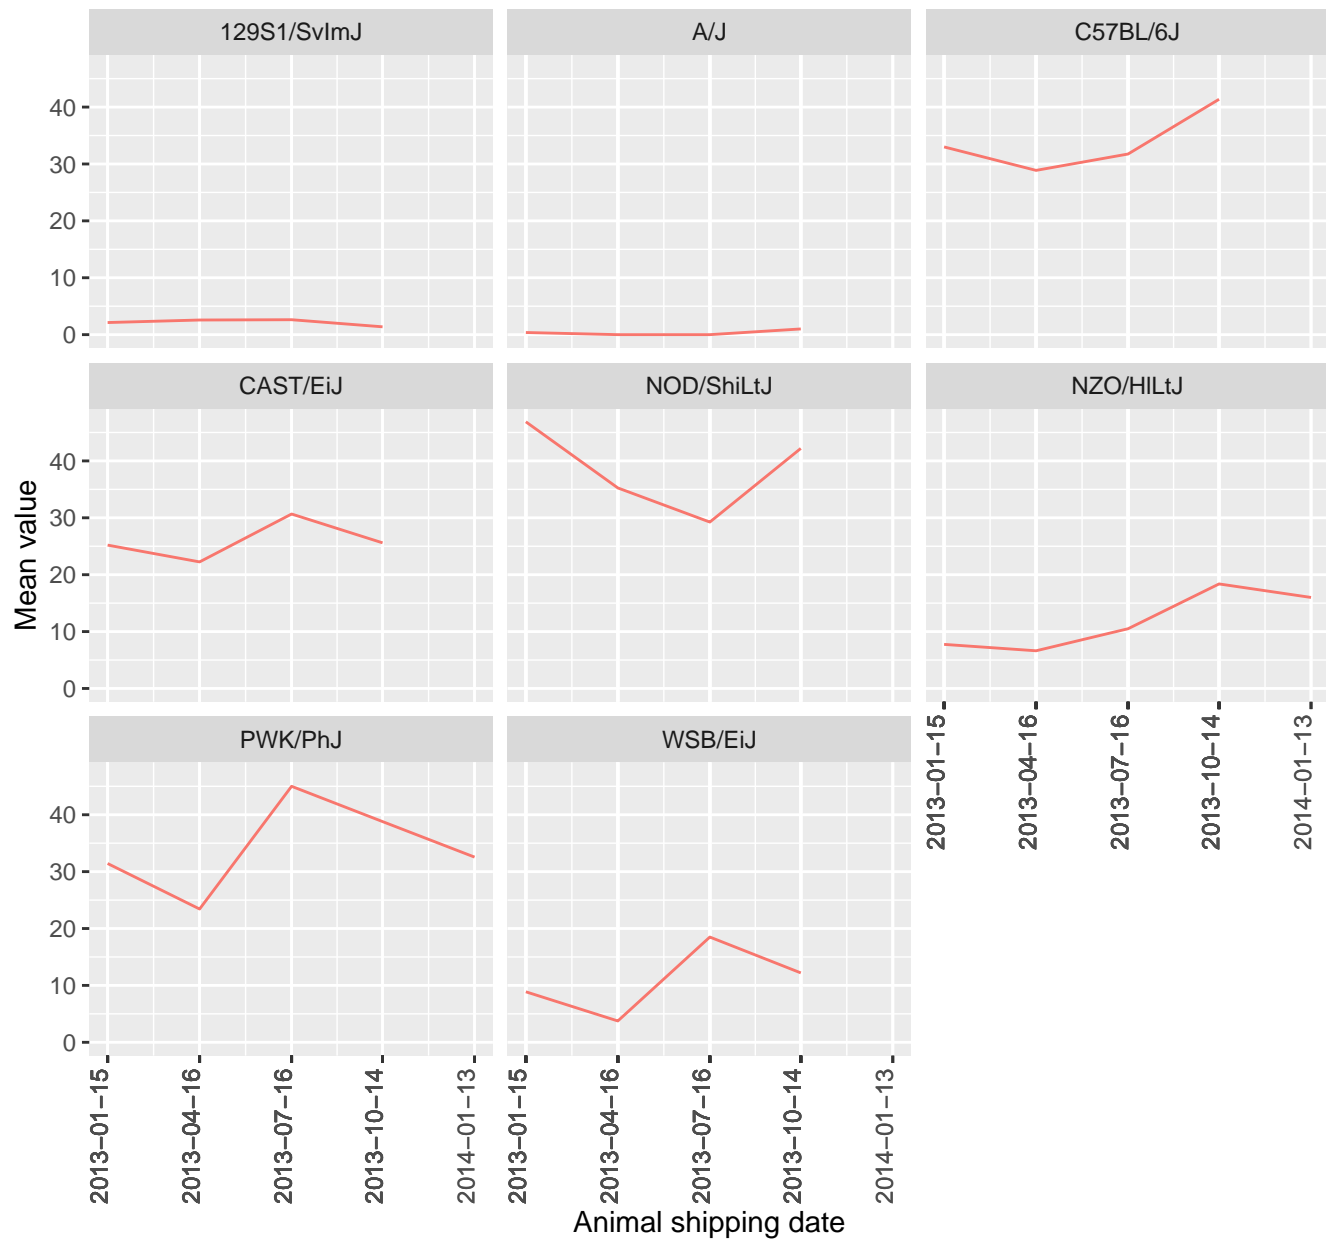

Procedure: GMC01  
Parameter: rears\_total

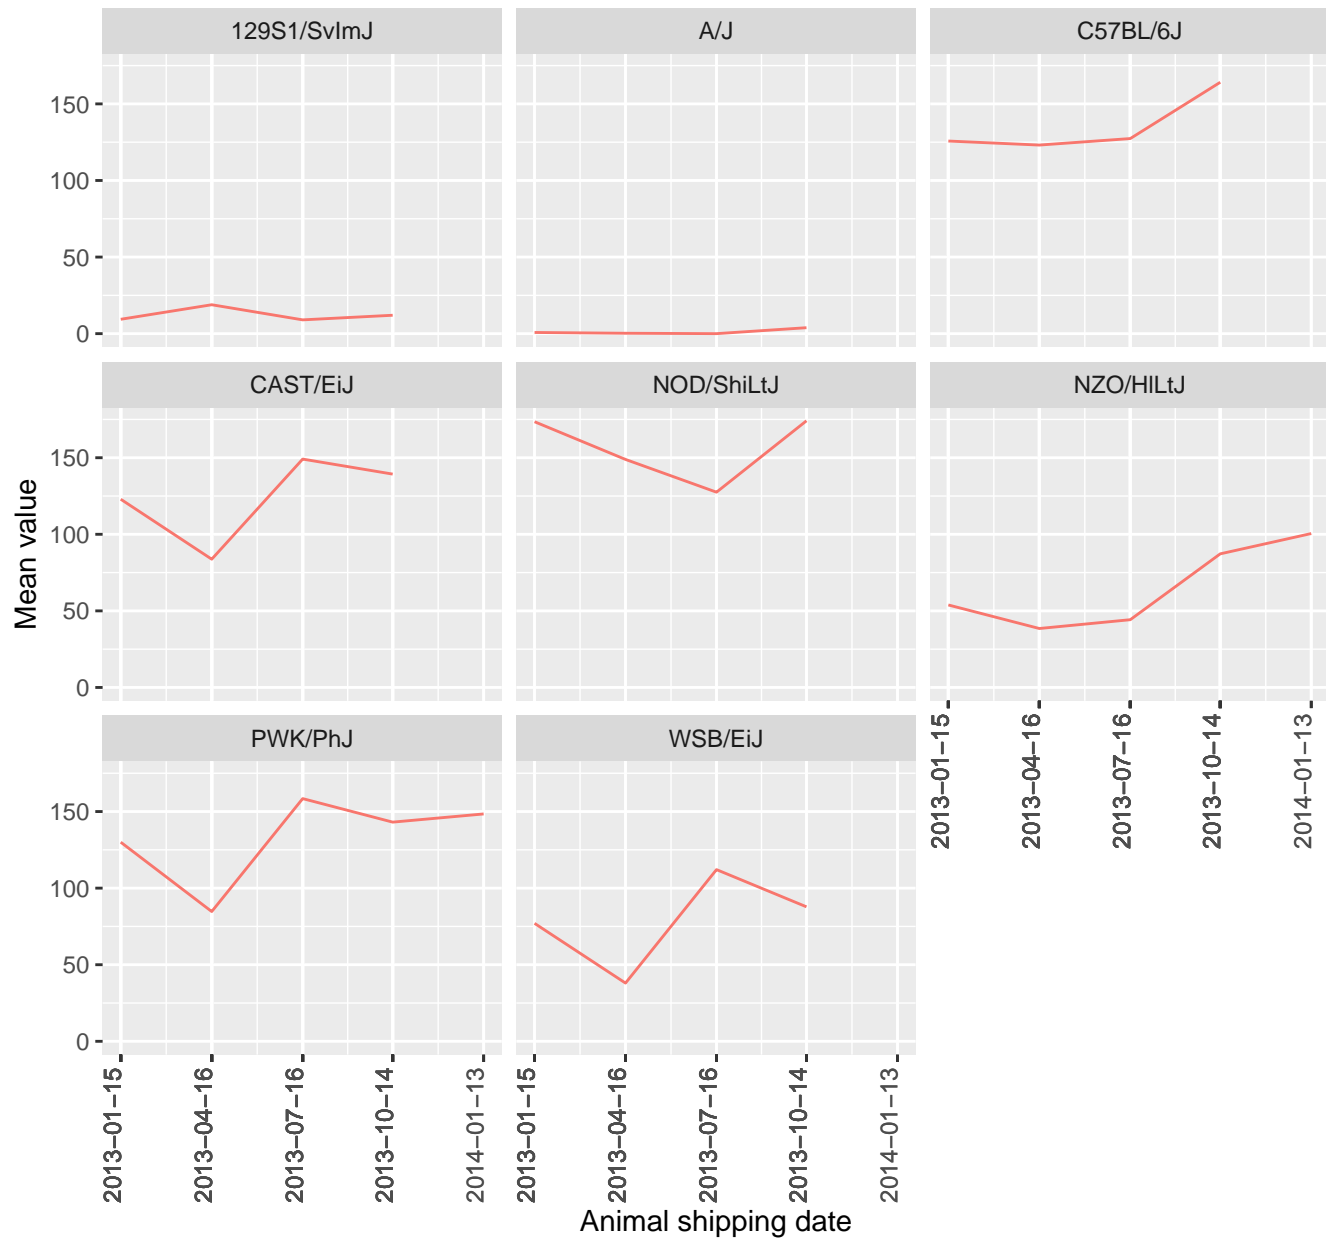

Procedure: GMC01  
Parameter: whole\_rest

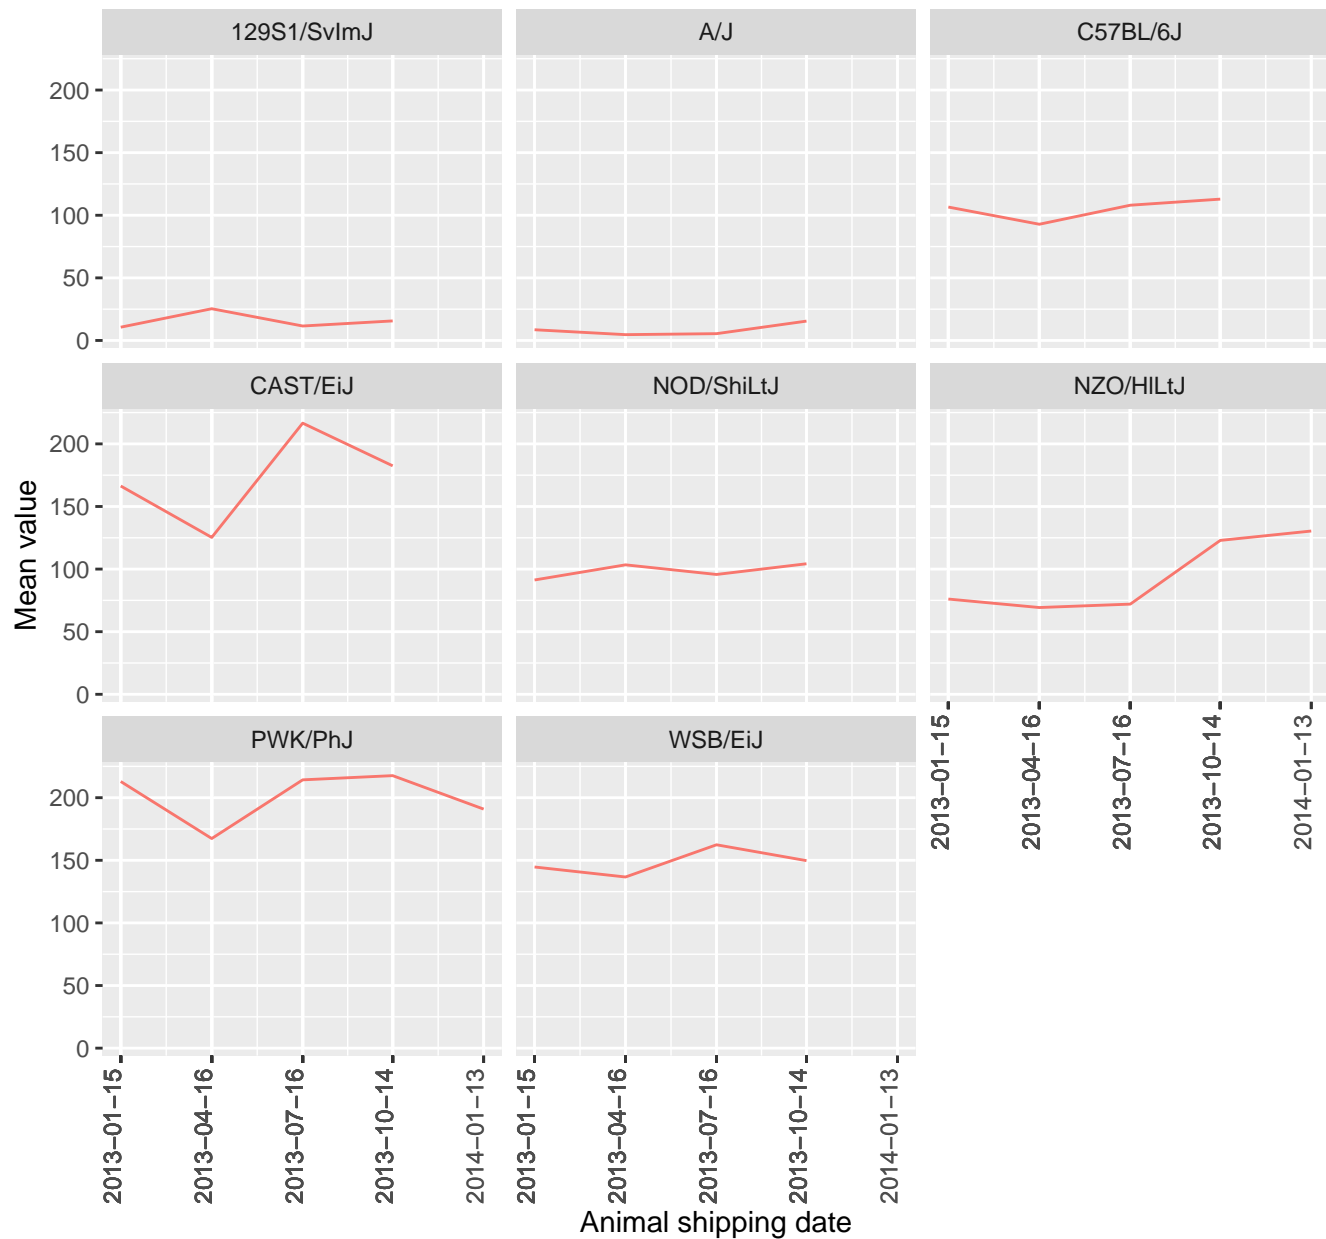

Procedure: GMC01  
Parameter: whole\_speed

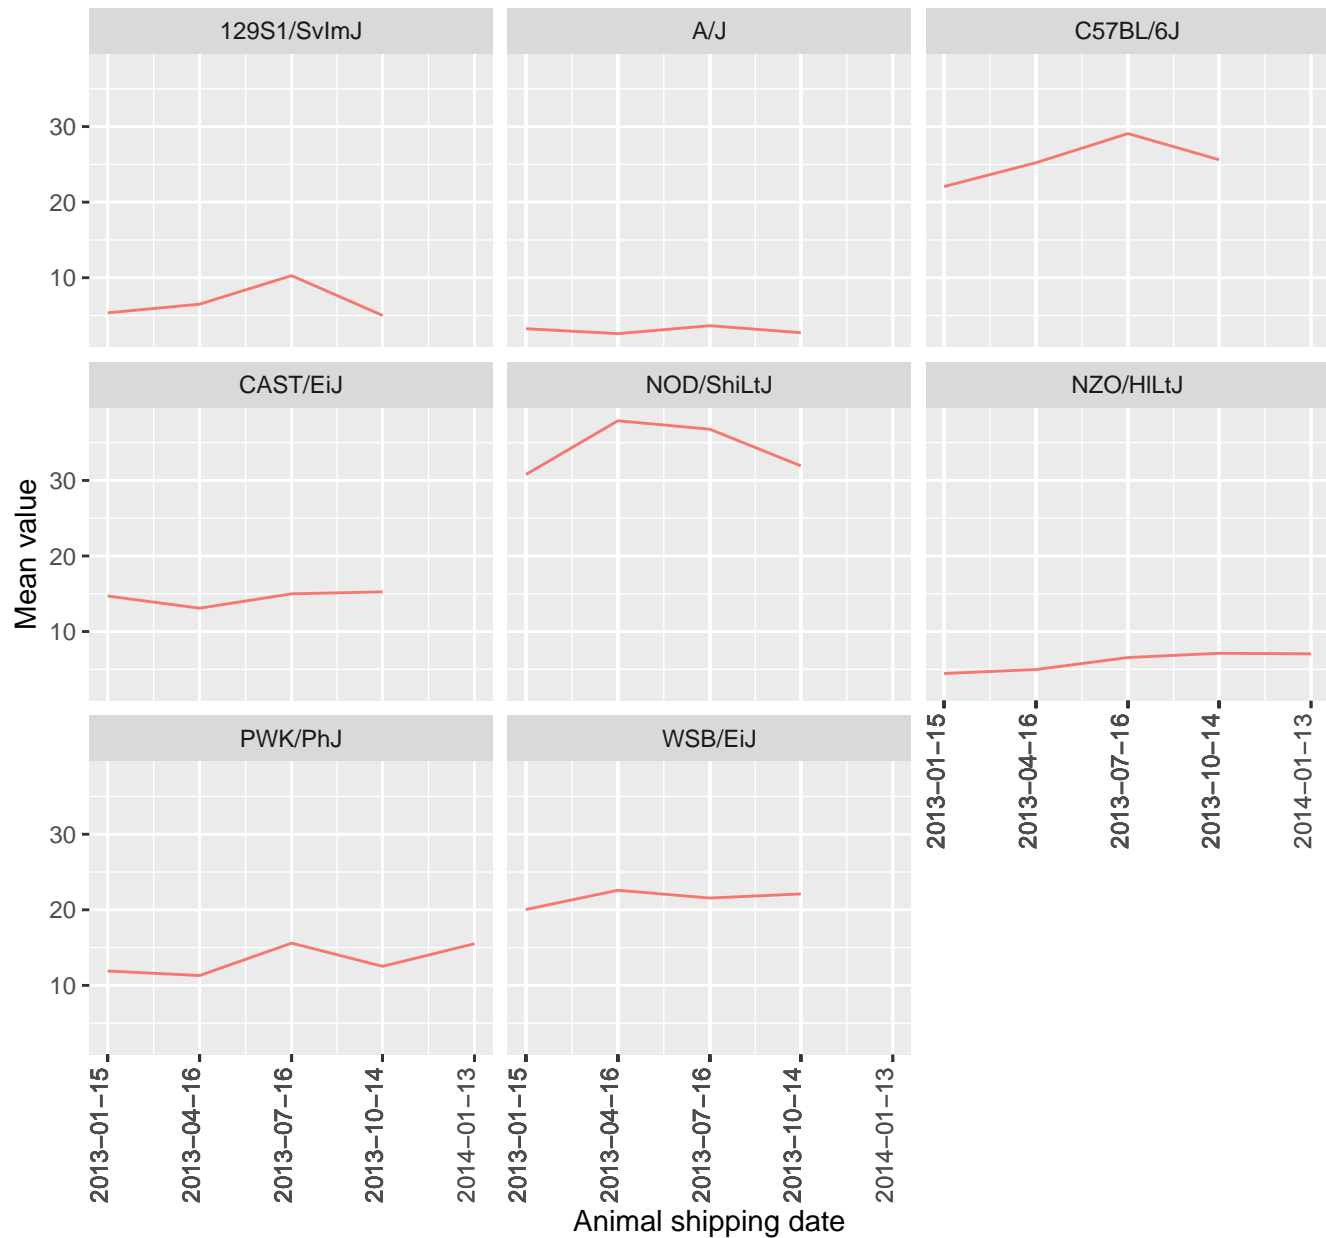



Procedure: GMC02

Parameter: all\_paws\_adj

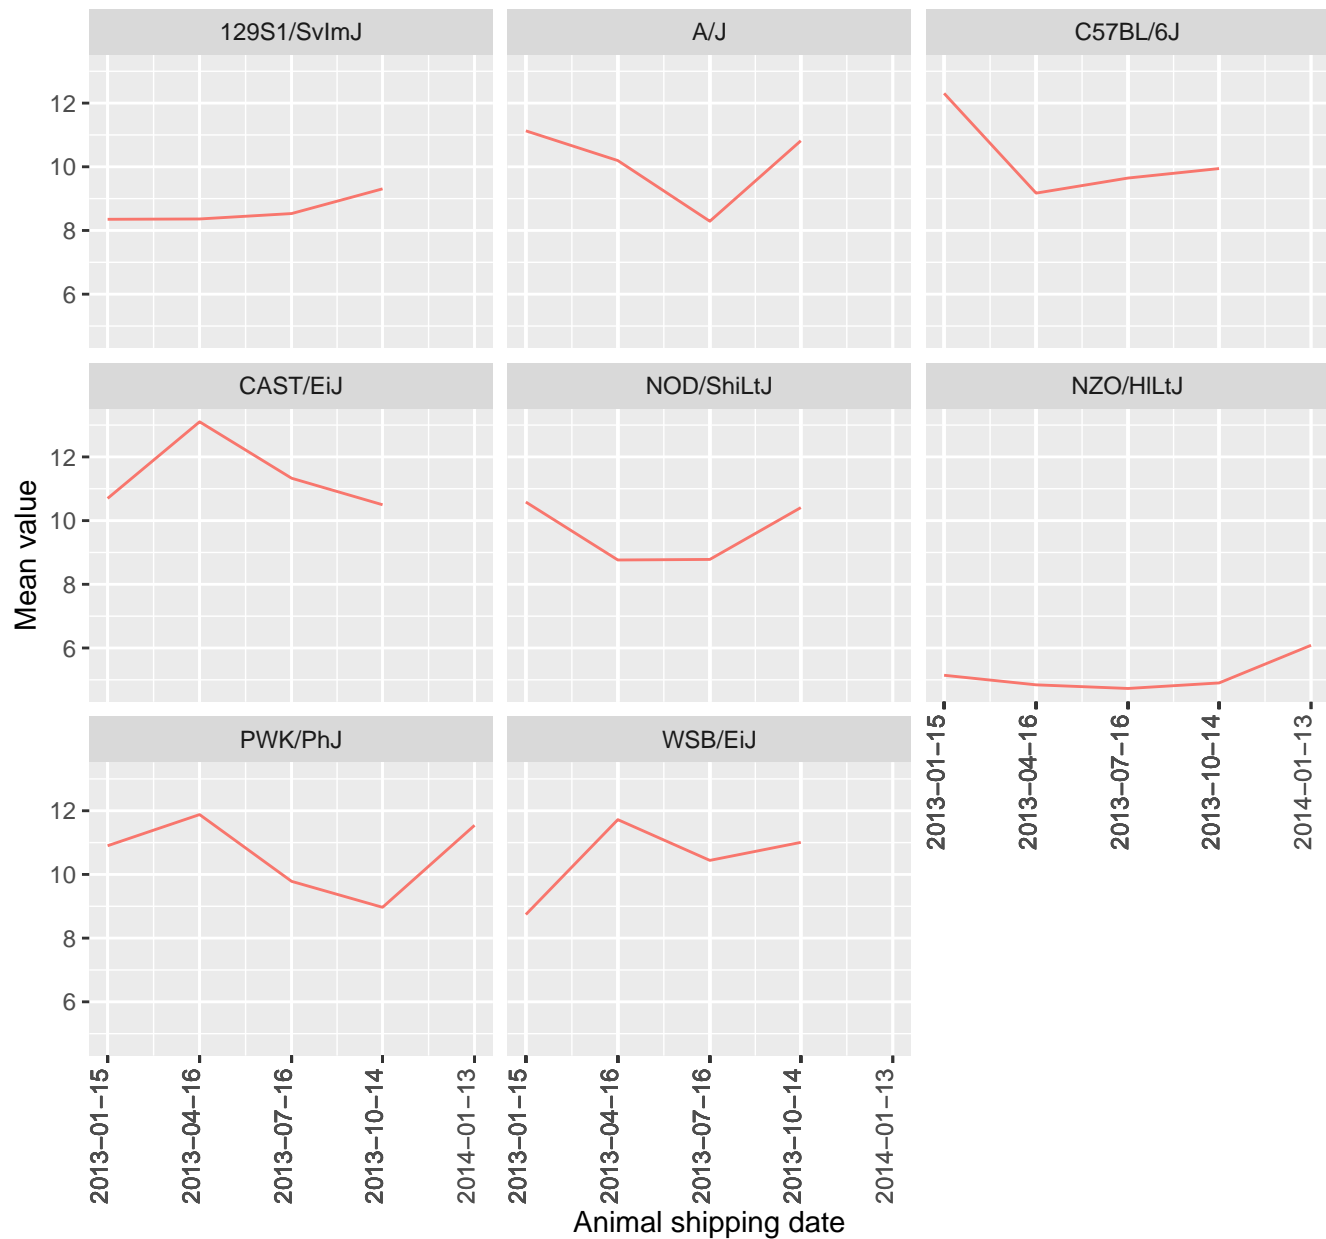

Procedure: GMC02  
Parameter: all\_paws\_mean

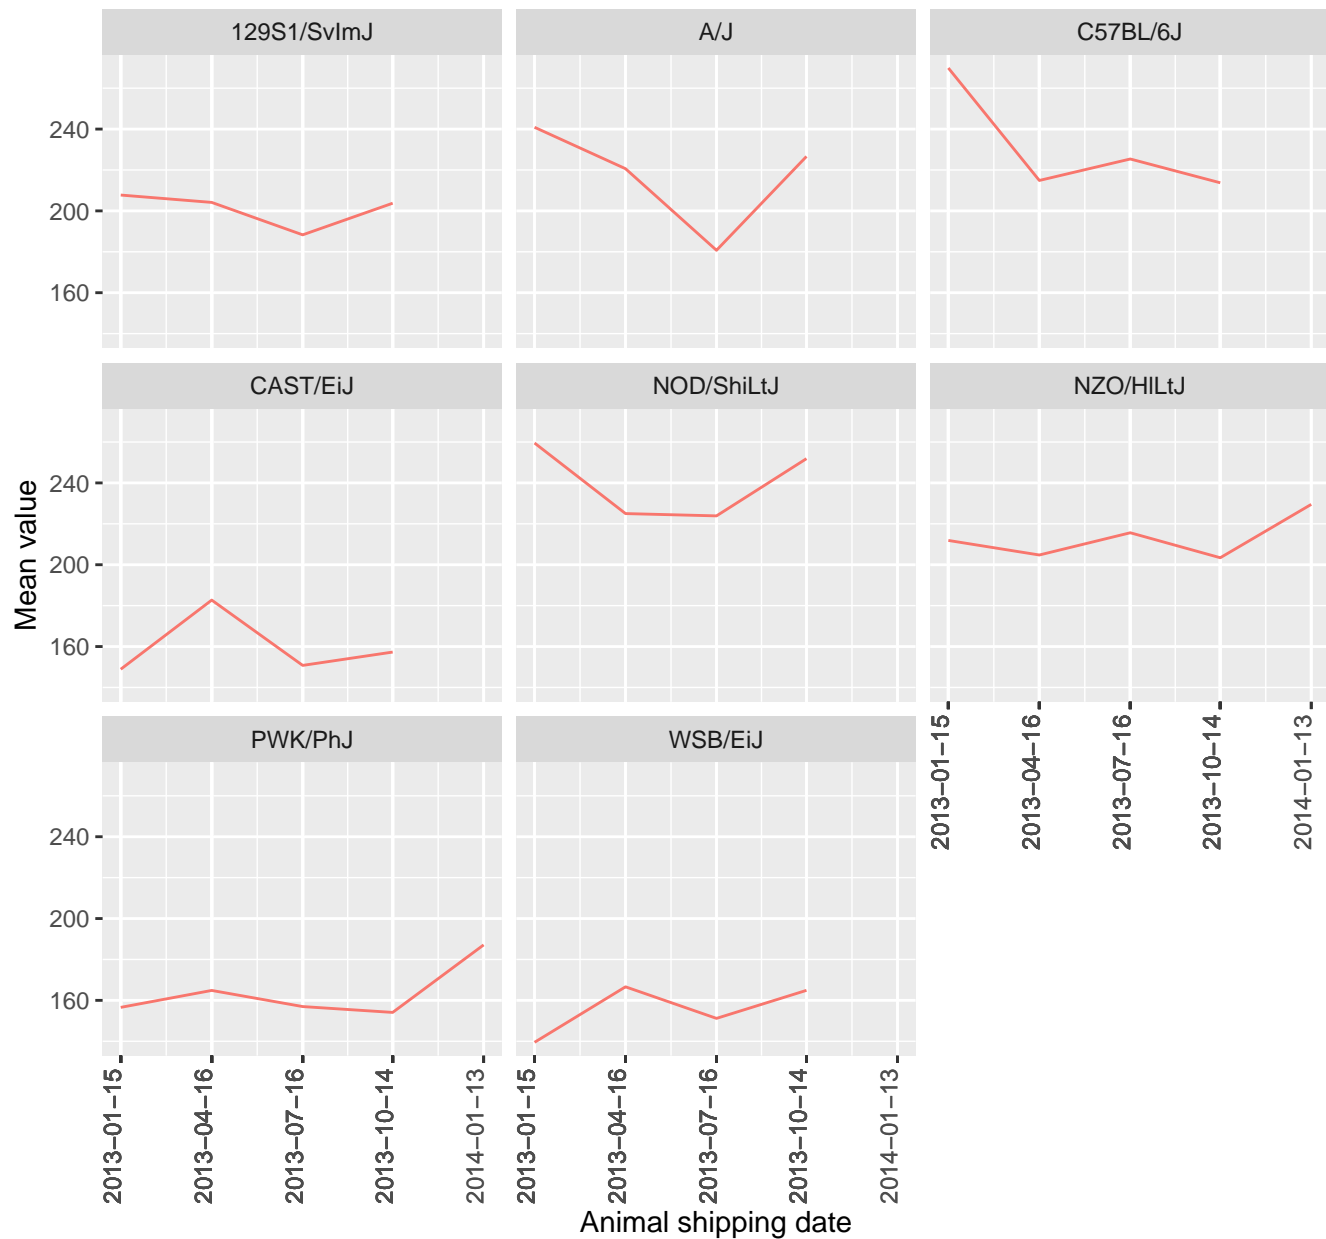

Procedure: GMC02  
Parameter: all\_paws1

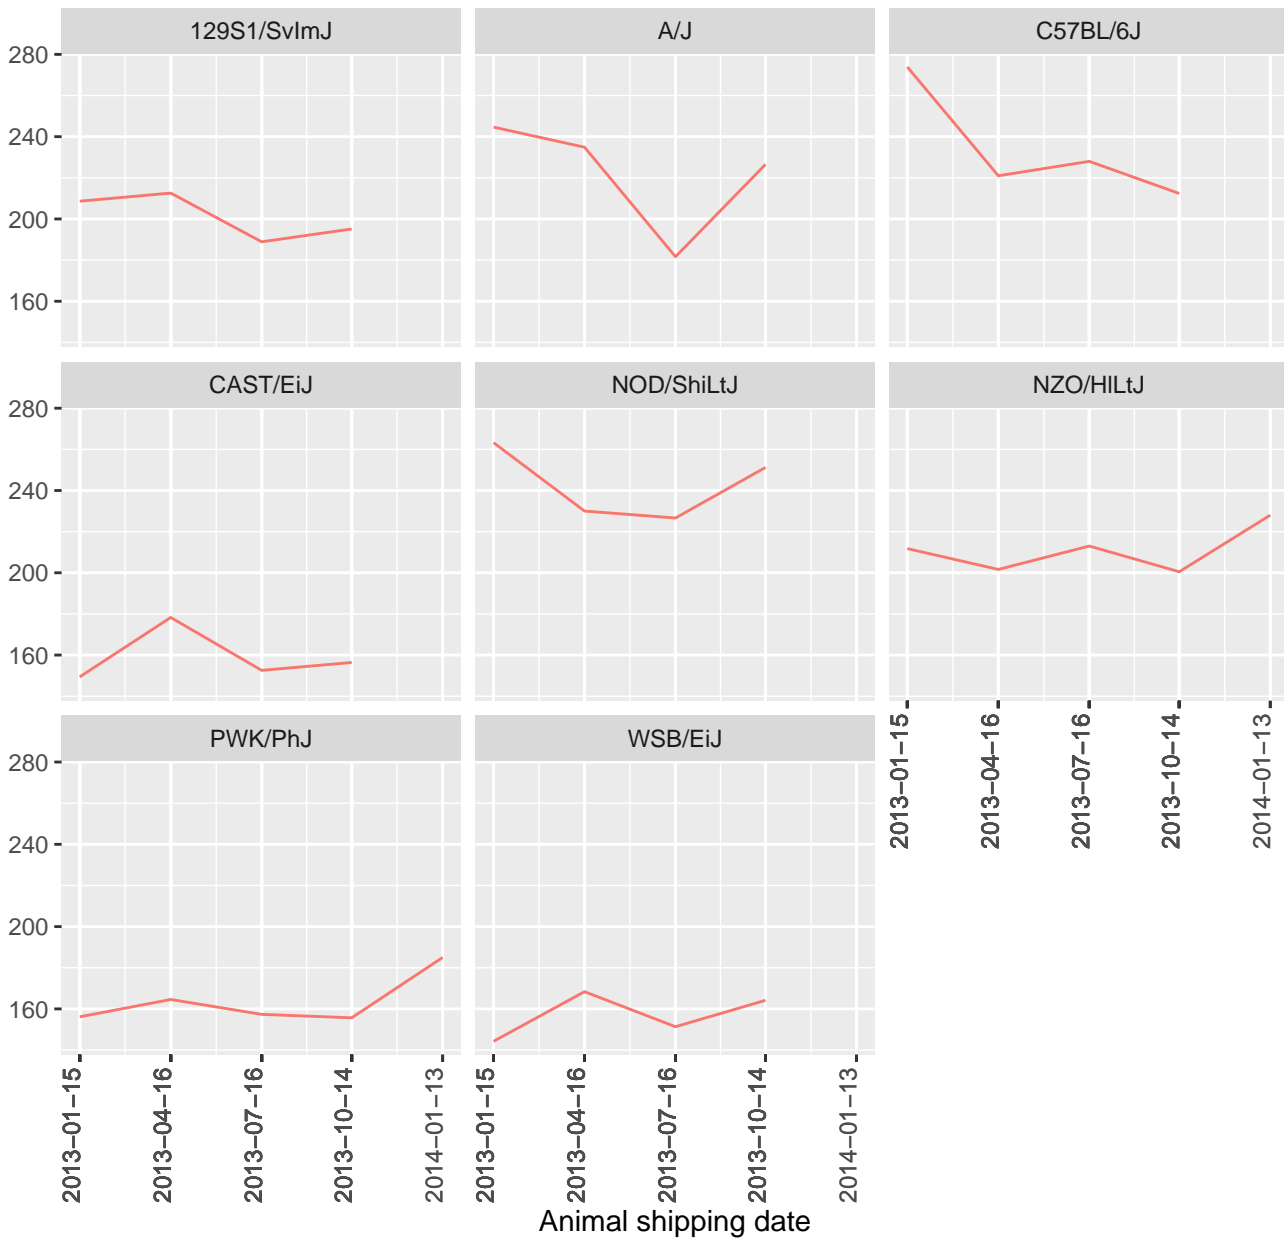

Procedure: GMC02  
Parameter: all\_paws2

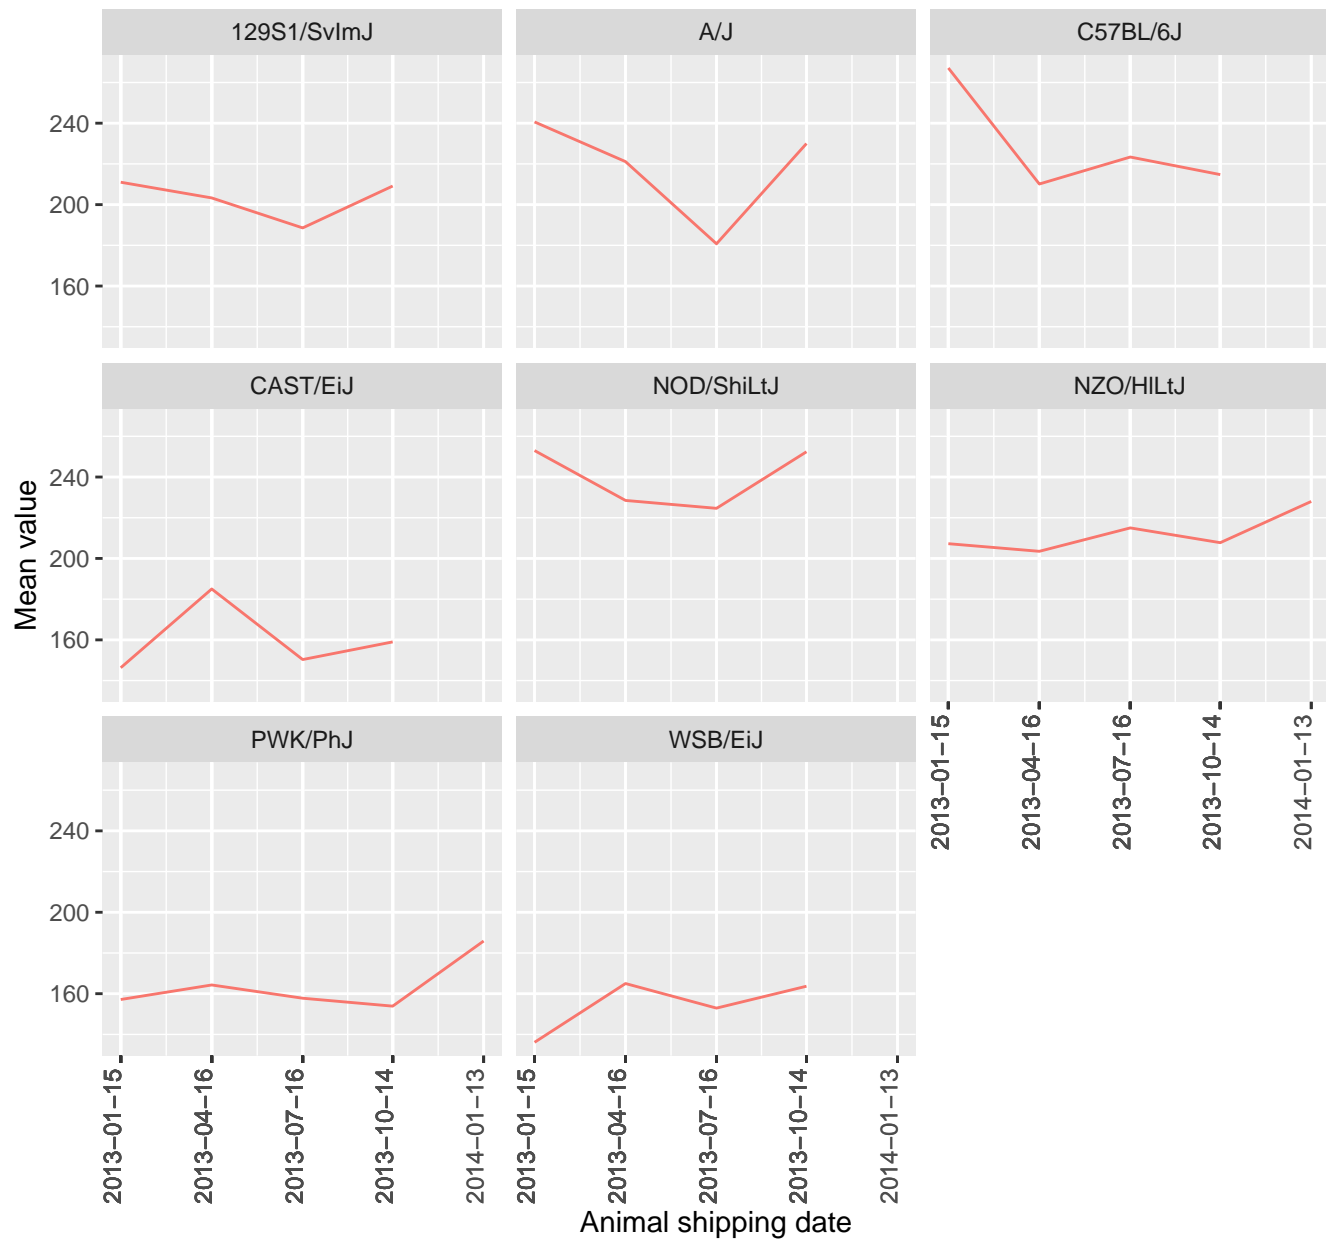

Procedure: GMC02  
Parameter: all\_paws3

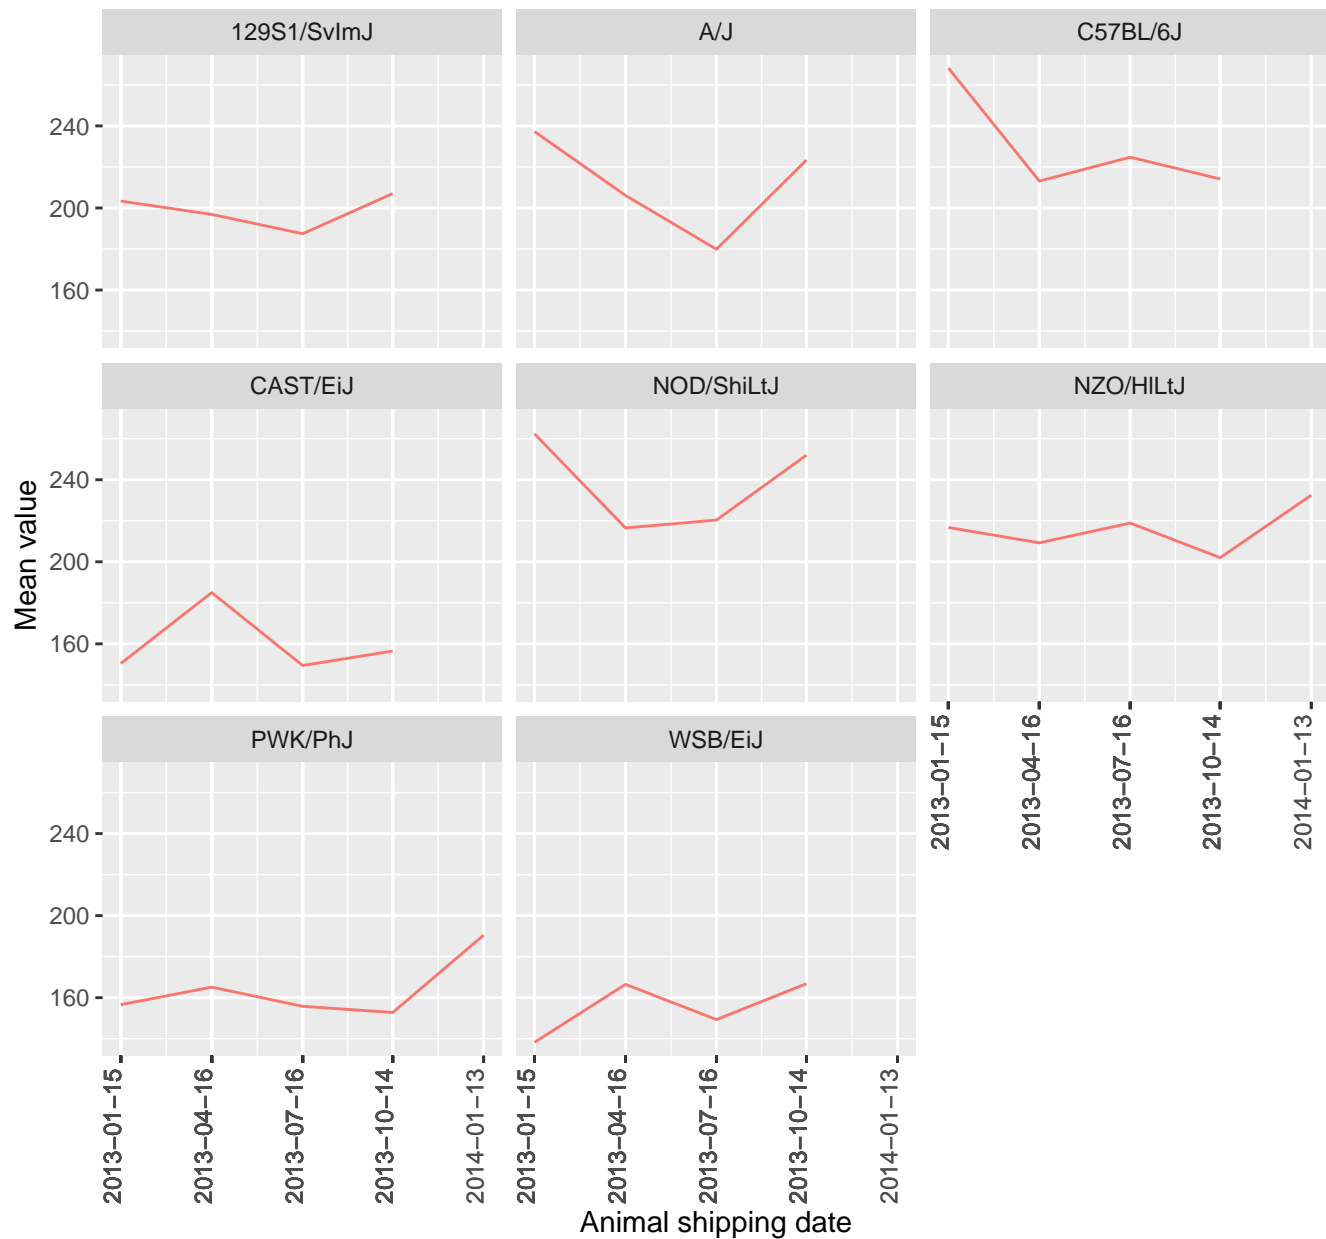

Procedure: GMC02

Parameter: front\_paws\_adj

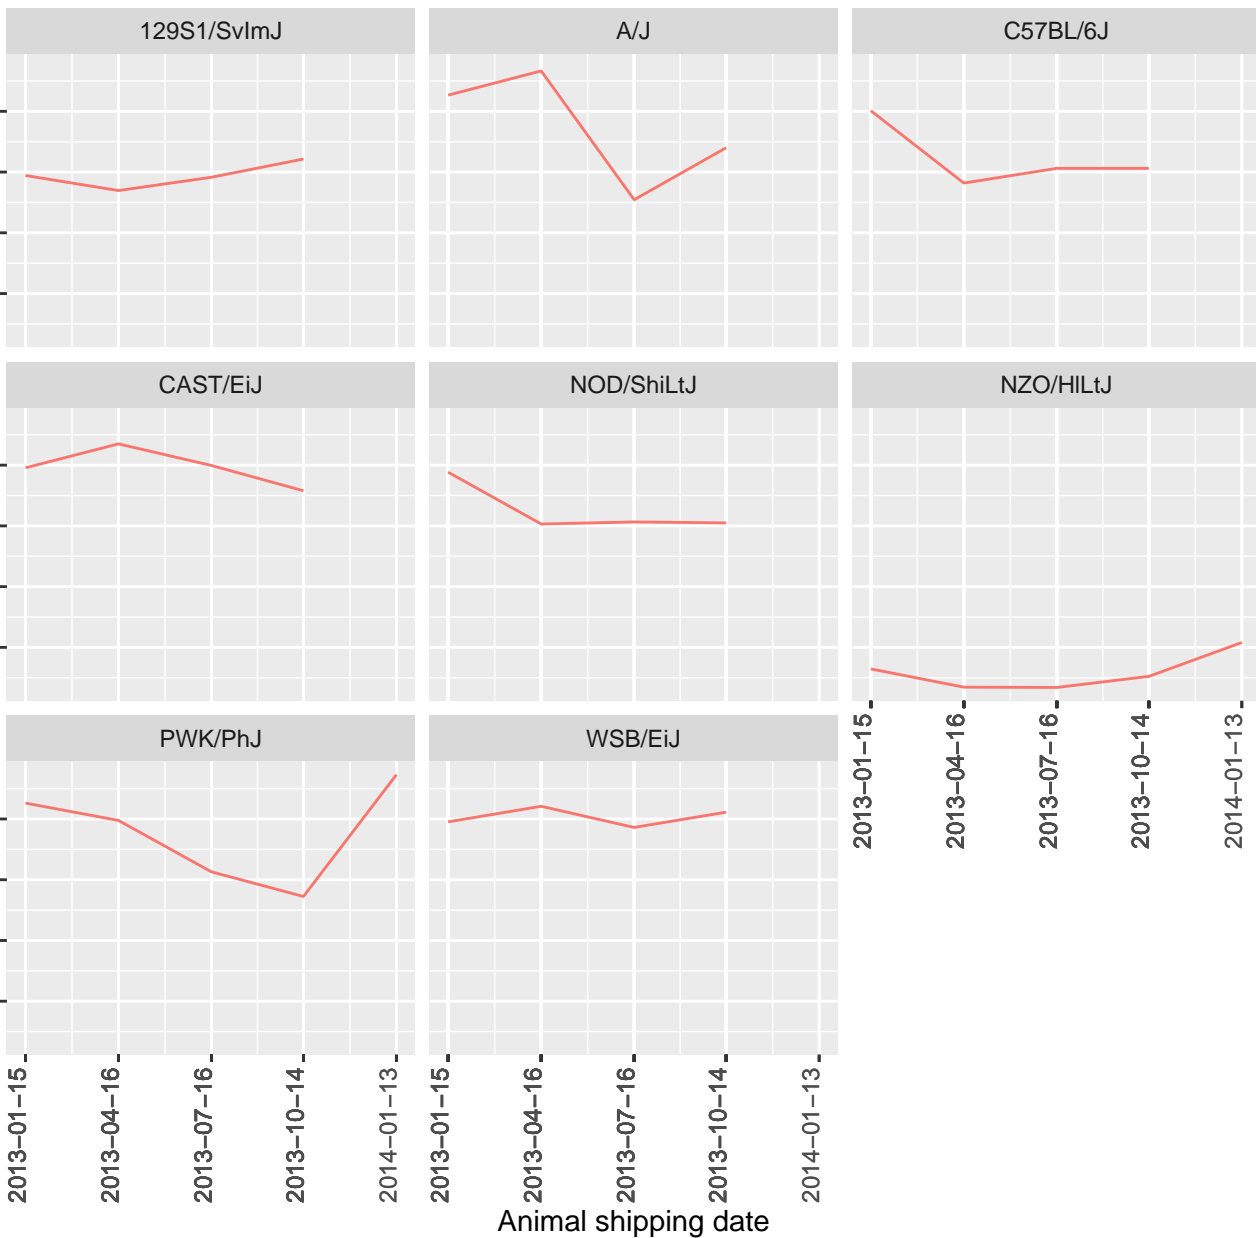

Procedure: GMC02  
Parameter: front\_paws\_mean

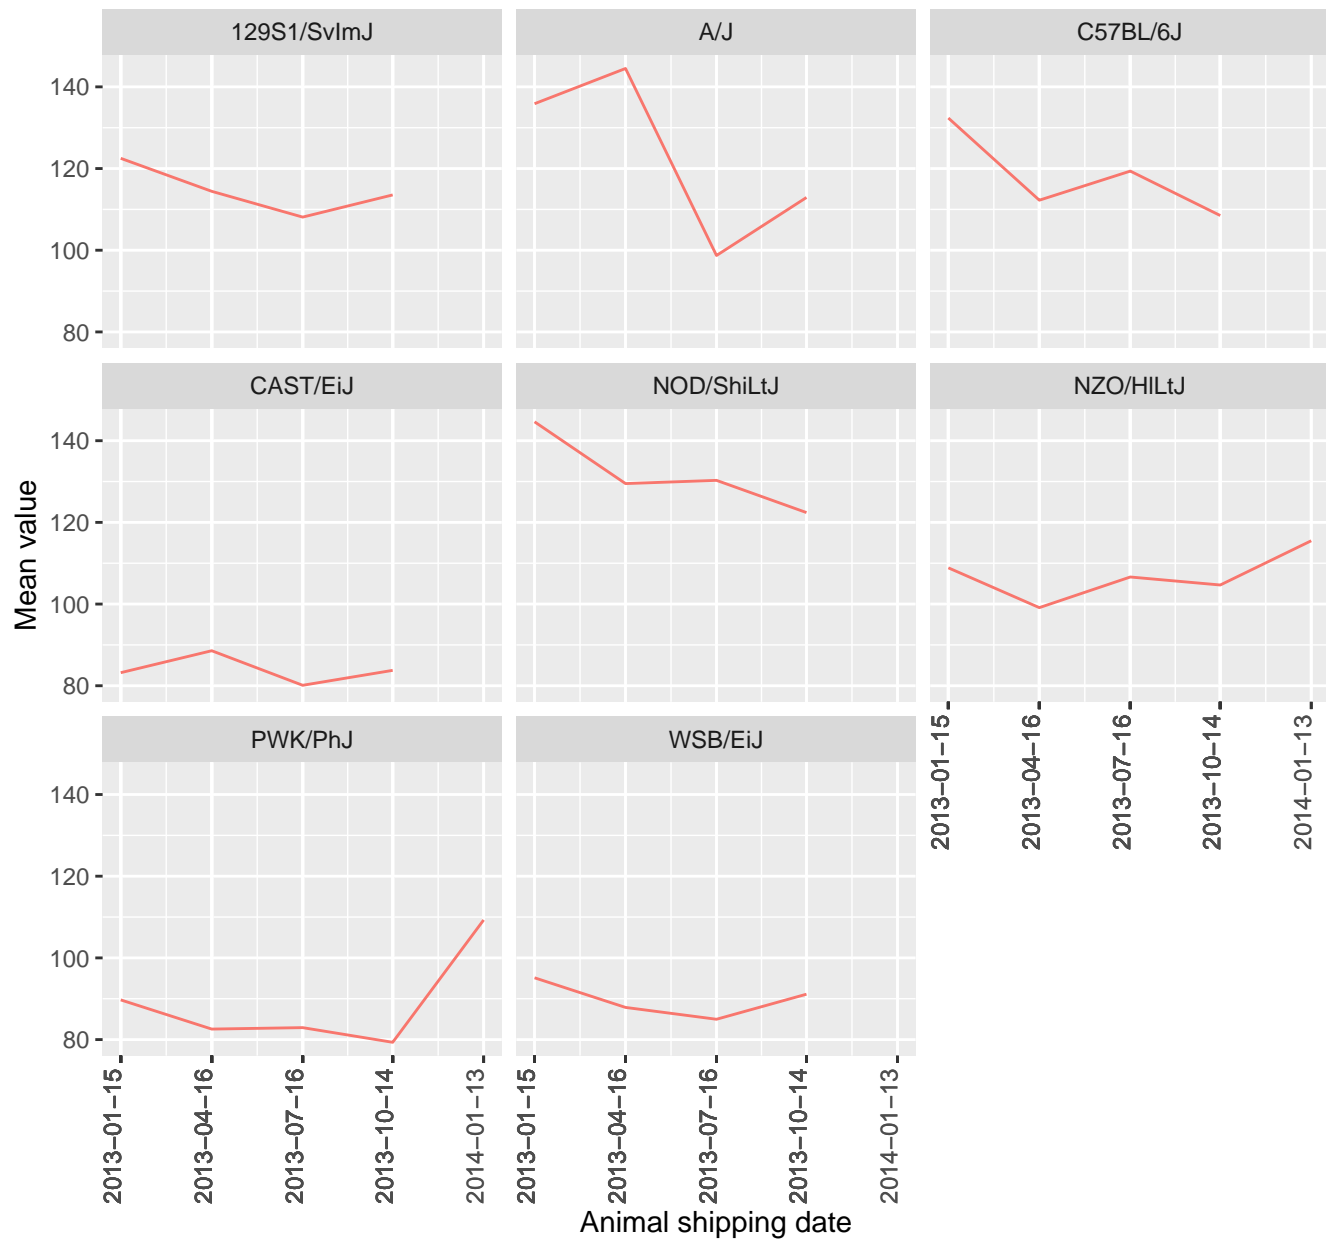

Procedure: GMC02  
Parameter: front\_paws1

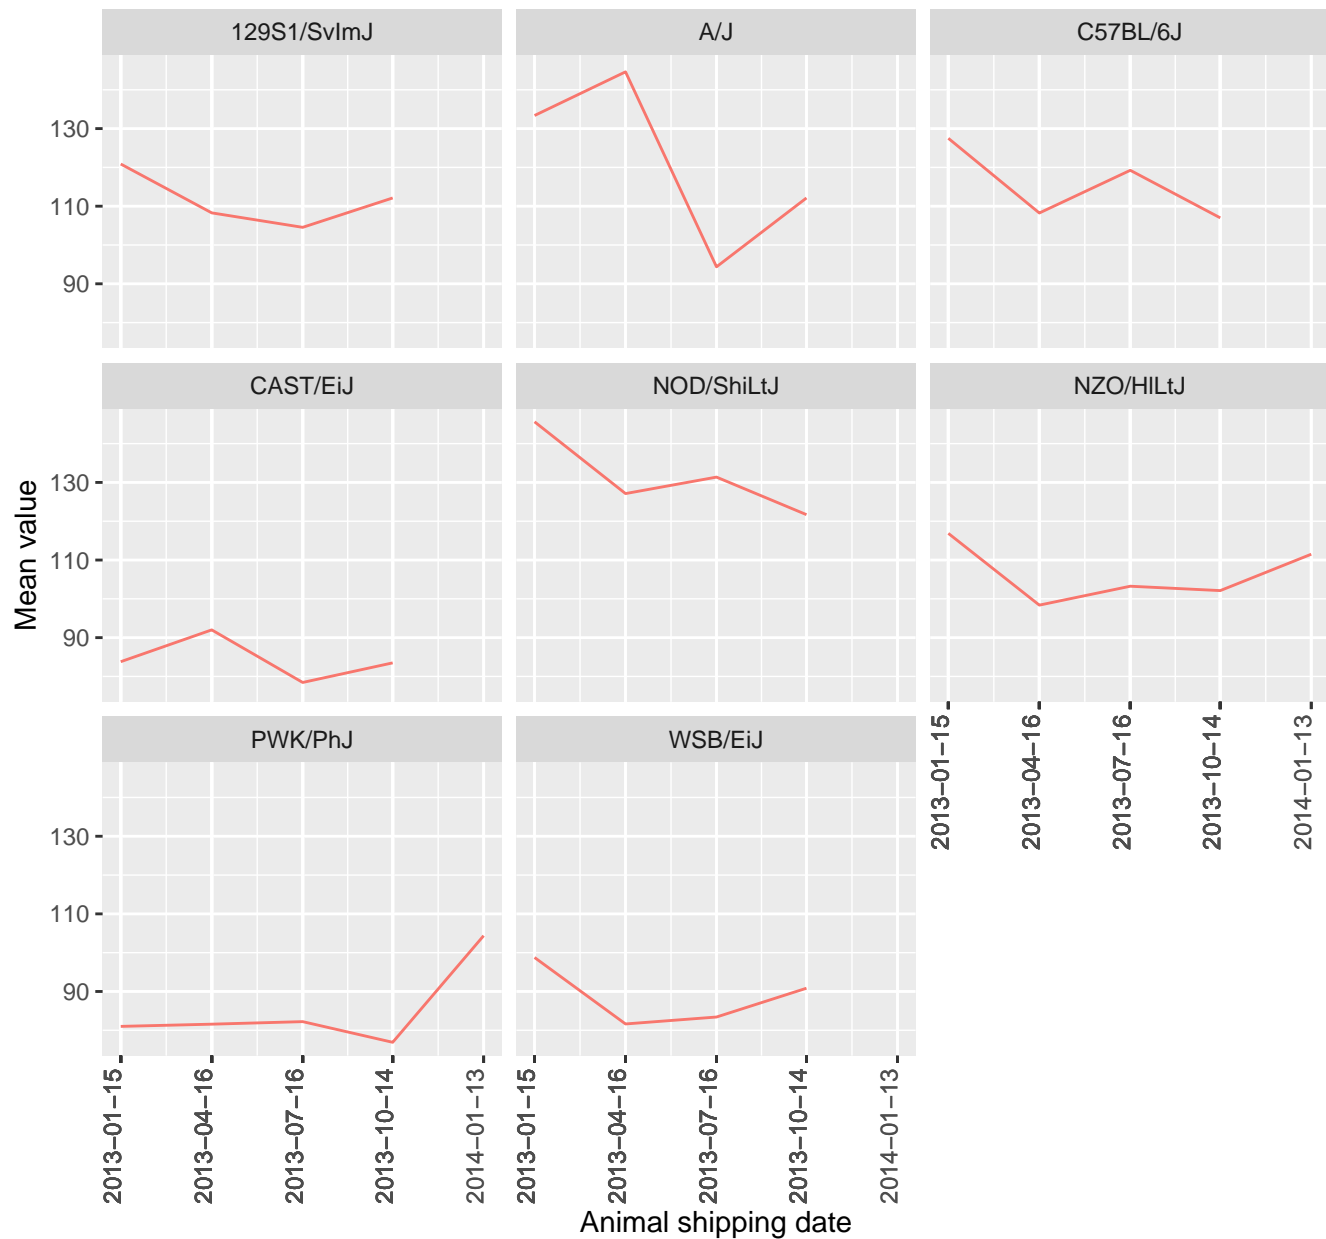



Procedure: GMC02  
Parameter: front\_paws2

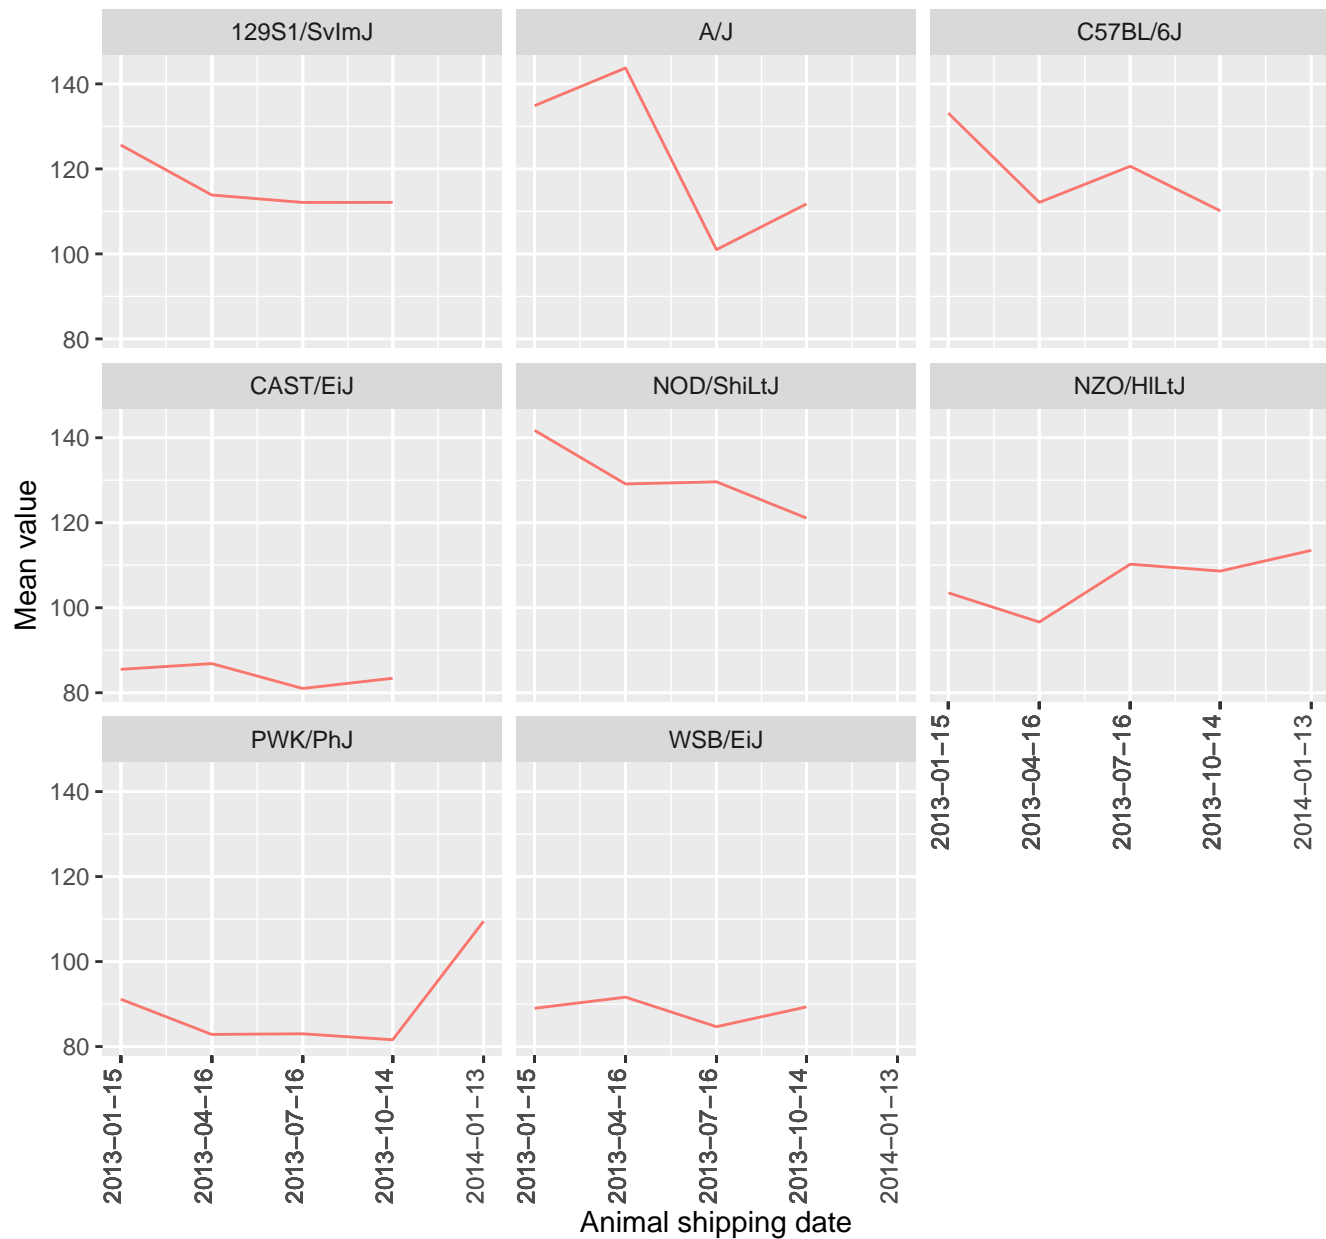

Procedure: GMC02  
Parameter: front\_paws3

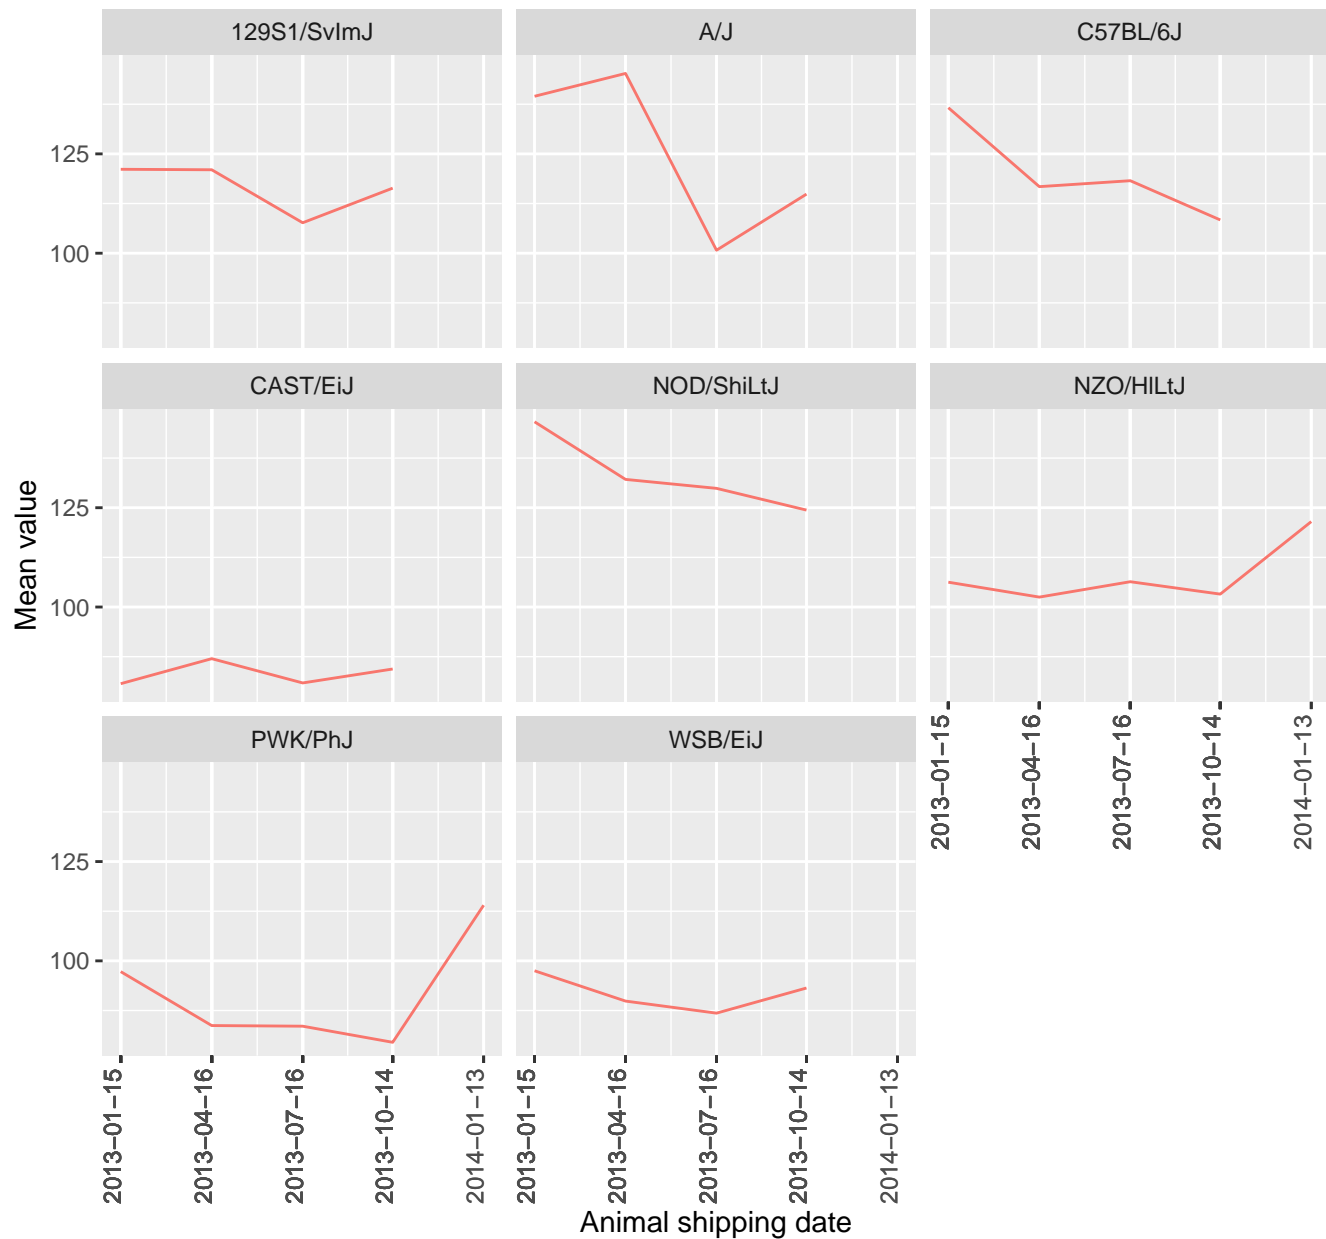

Procedure: GMC03  
Parameter: bite\_evidence

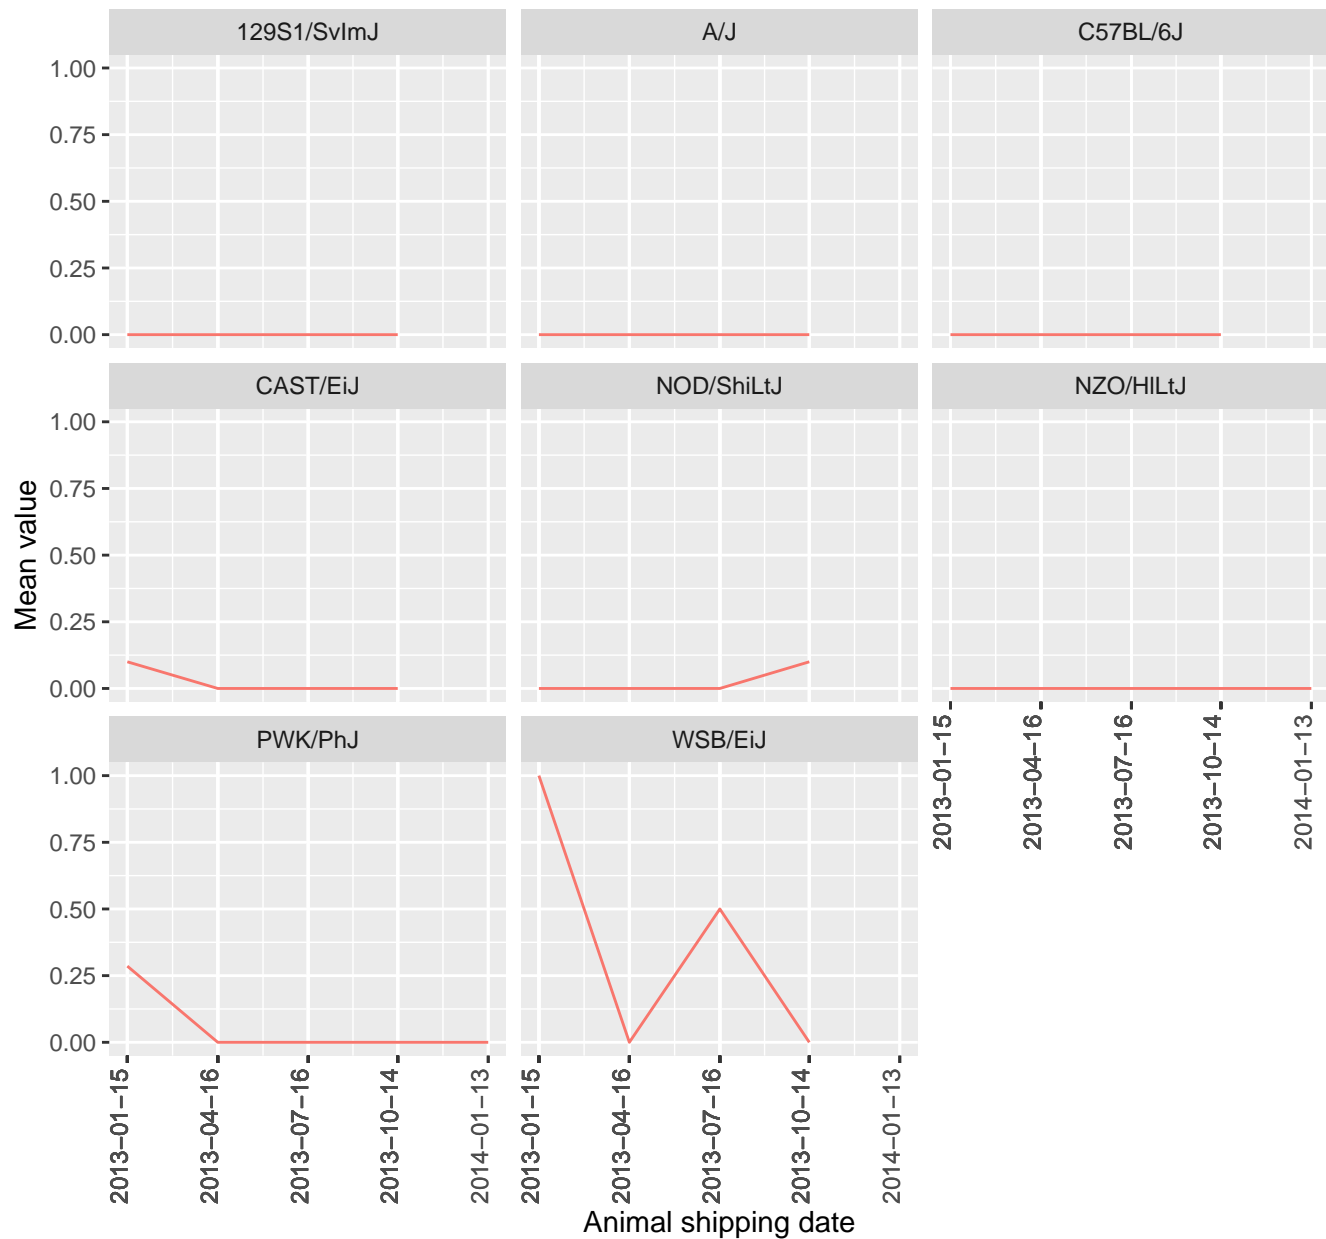

Procedure: GMC03  
Parameter: body\_pos

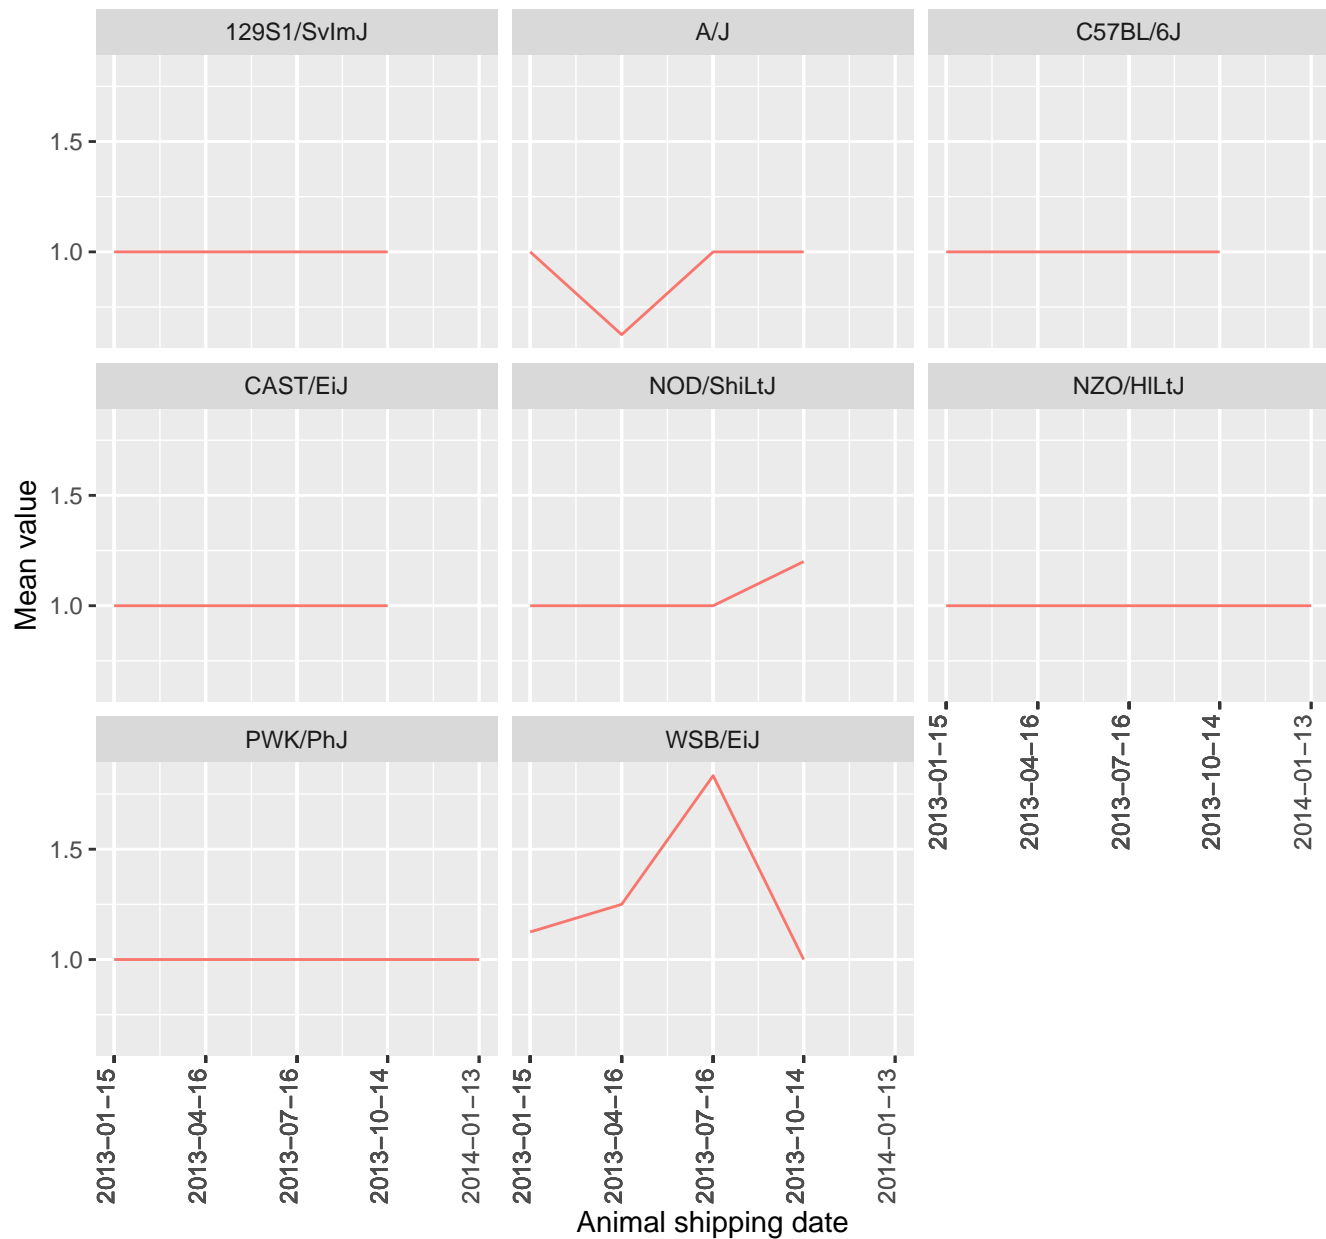

Procedure: GMC03  
Parameter: coat\_app

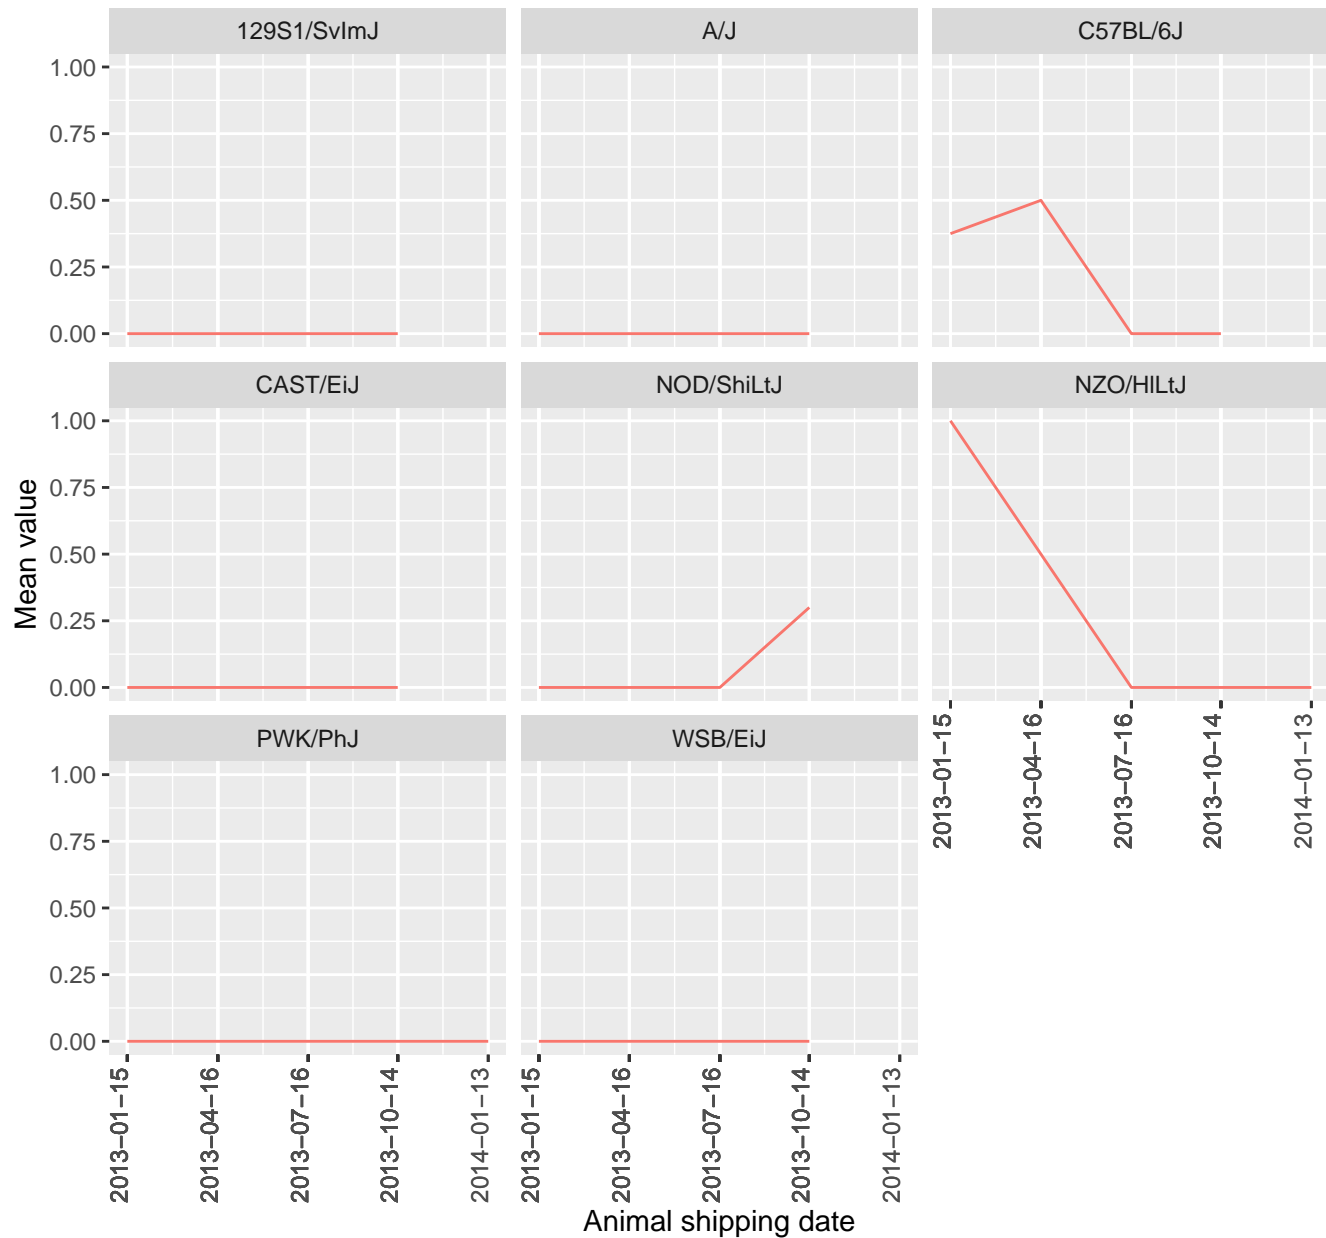

Procedure: GMC03

Parameter: cornea\_reflex

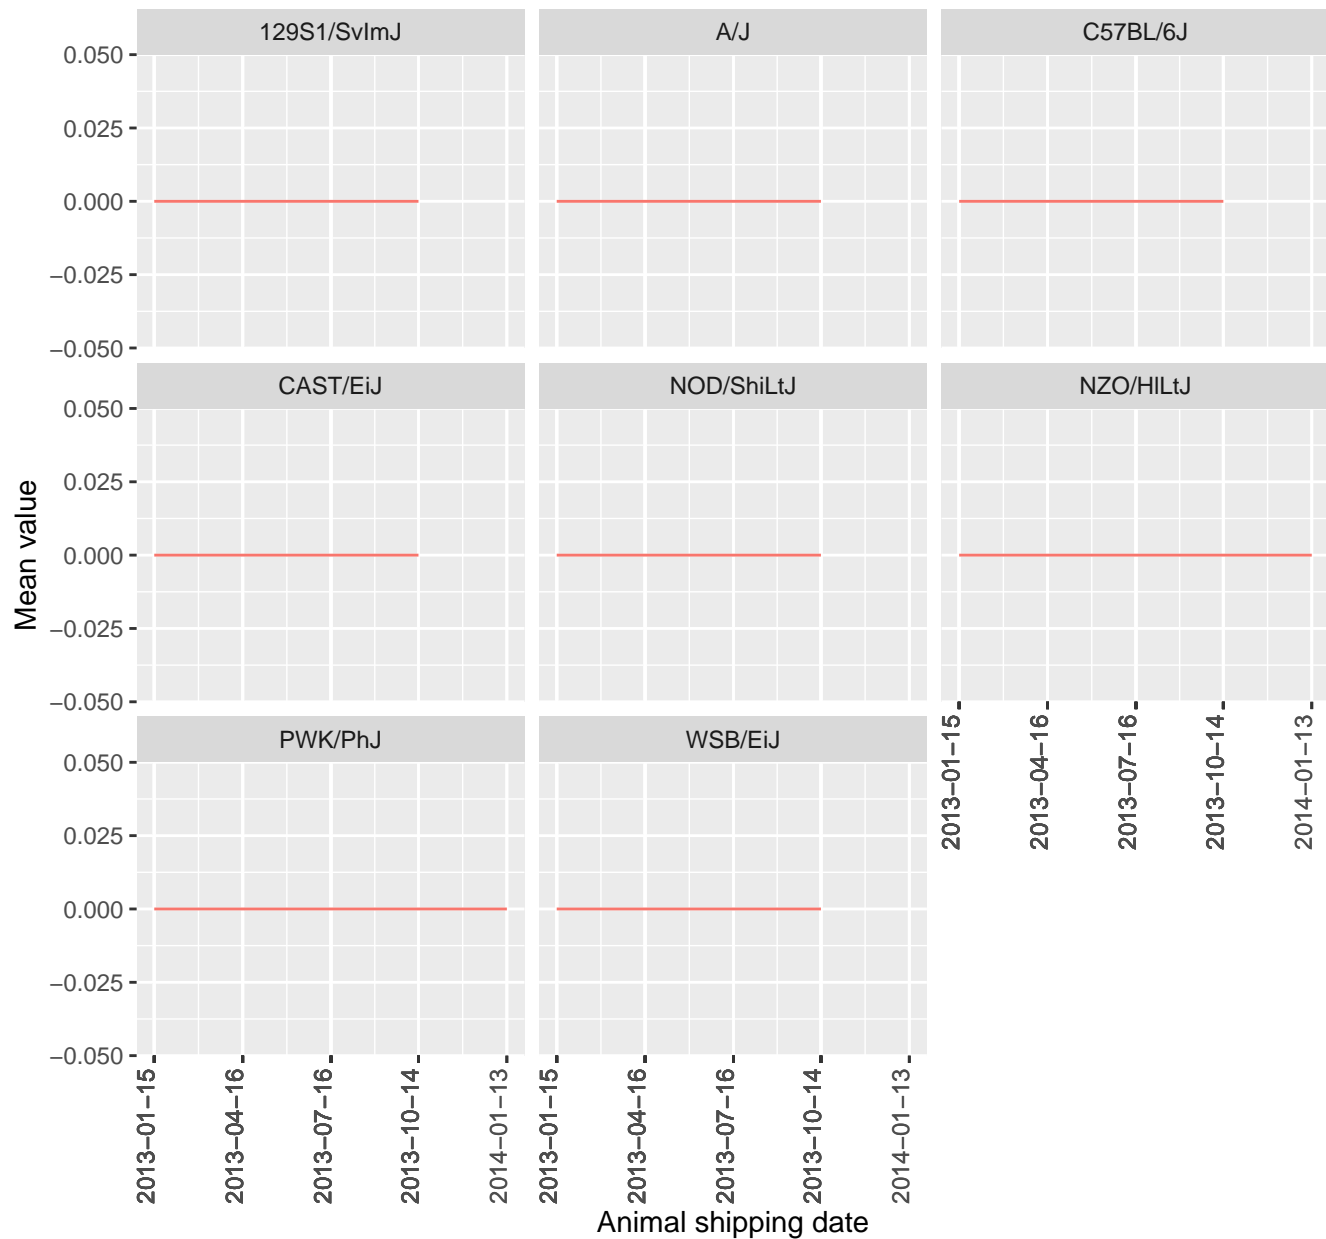

Procedure: GMC03  
Parameter: deafness

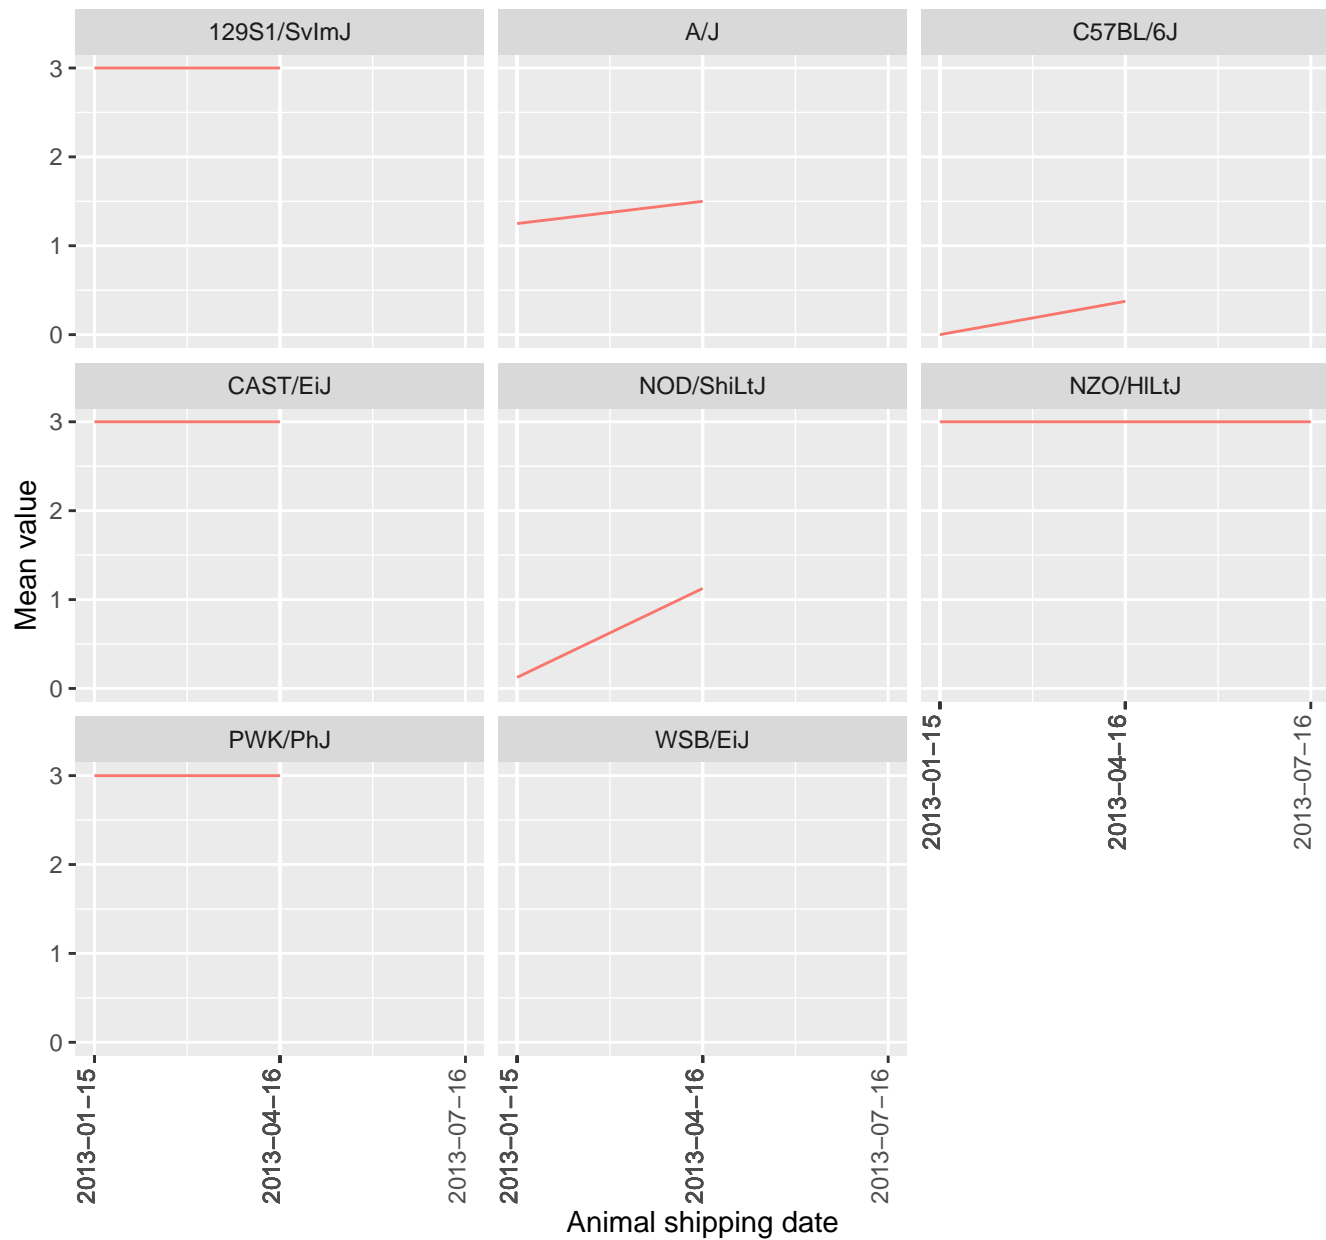

Procedure: GMC03  
Parameter: defecation

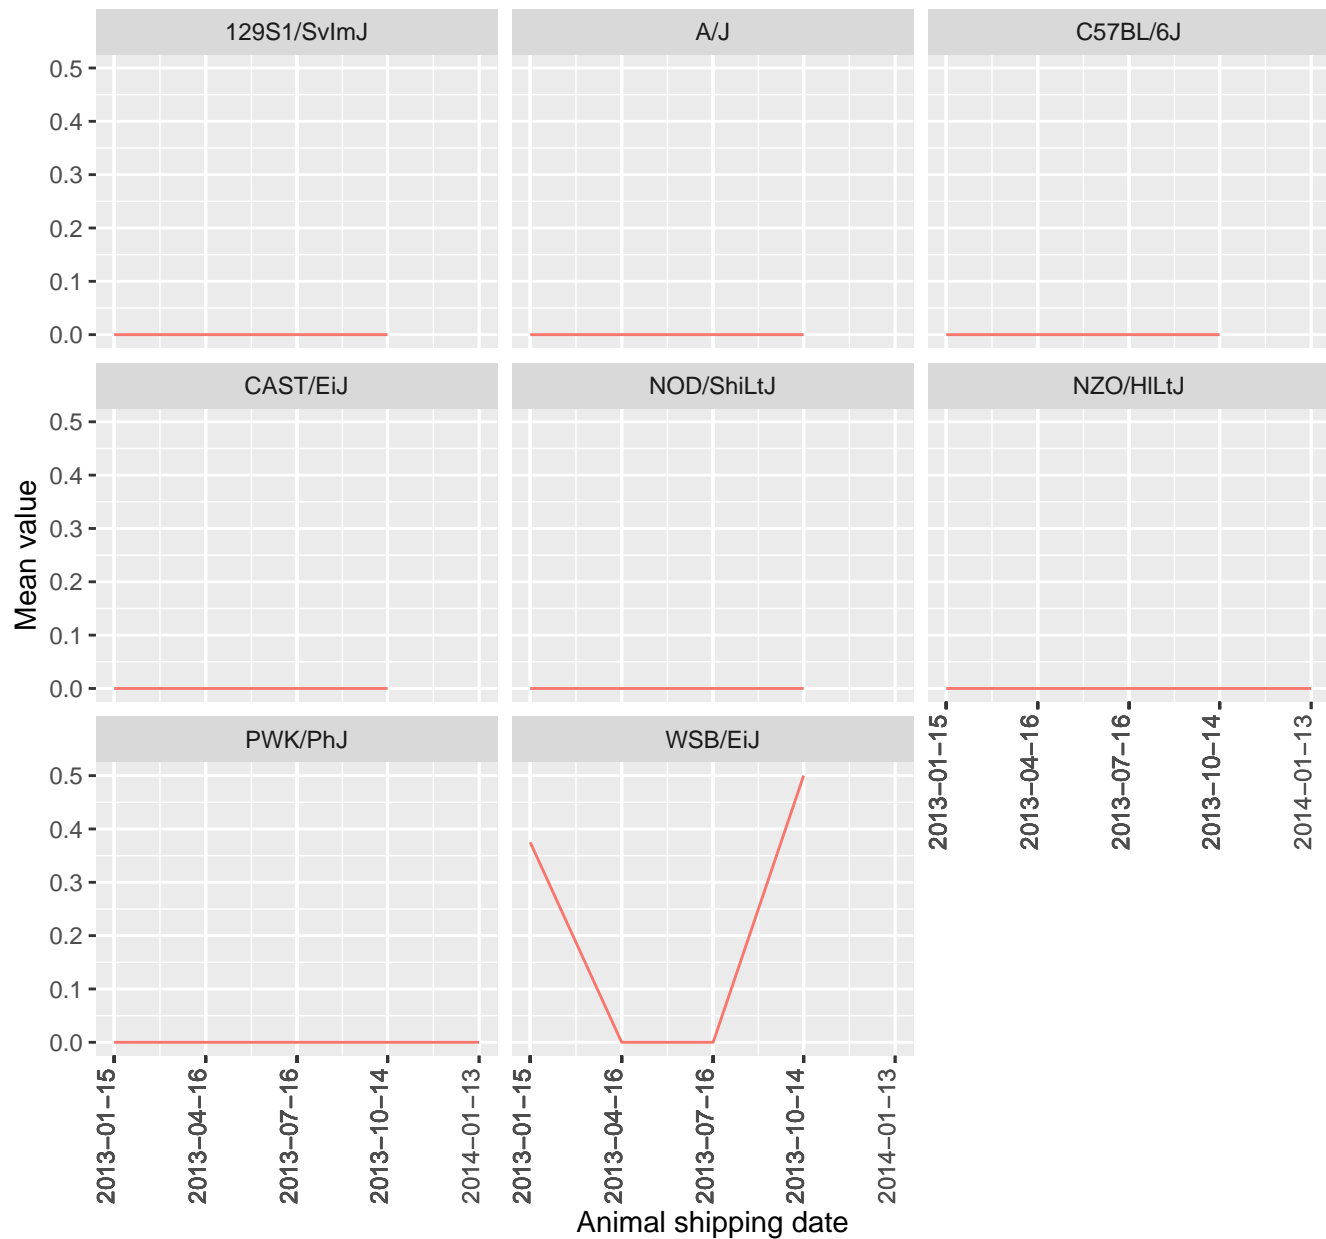



Procedure: GMC03

Parameter: gait

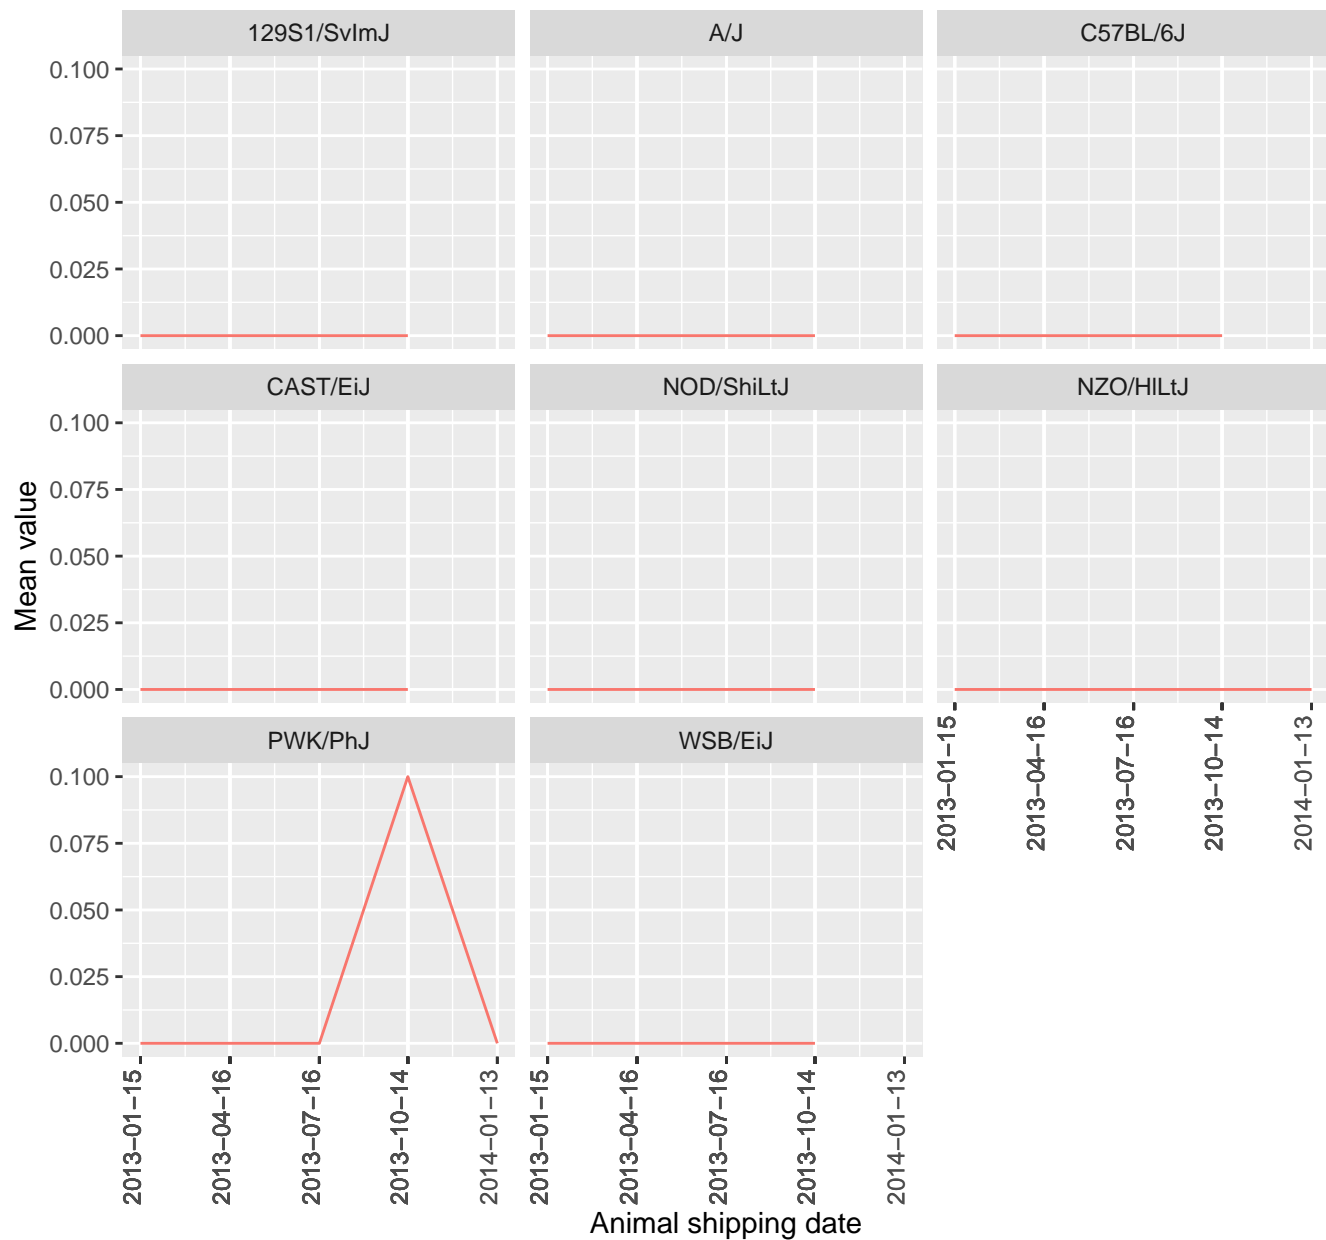

Procedure: GMC03  
Parameter: lacrimation



Procedure: GMC03

Parameter: limb\_grasping



Procedure: GMC03  
Parameter: loco\_activity

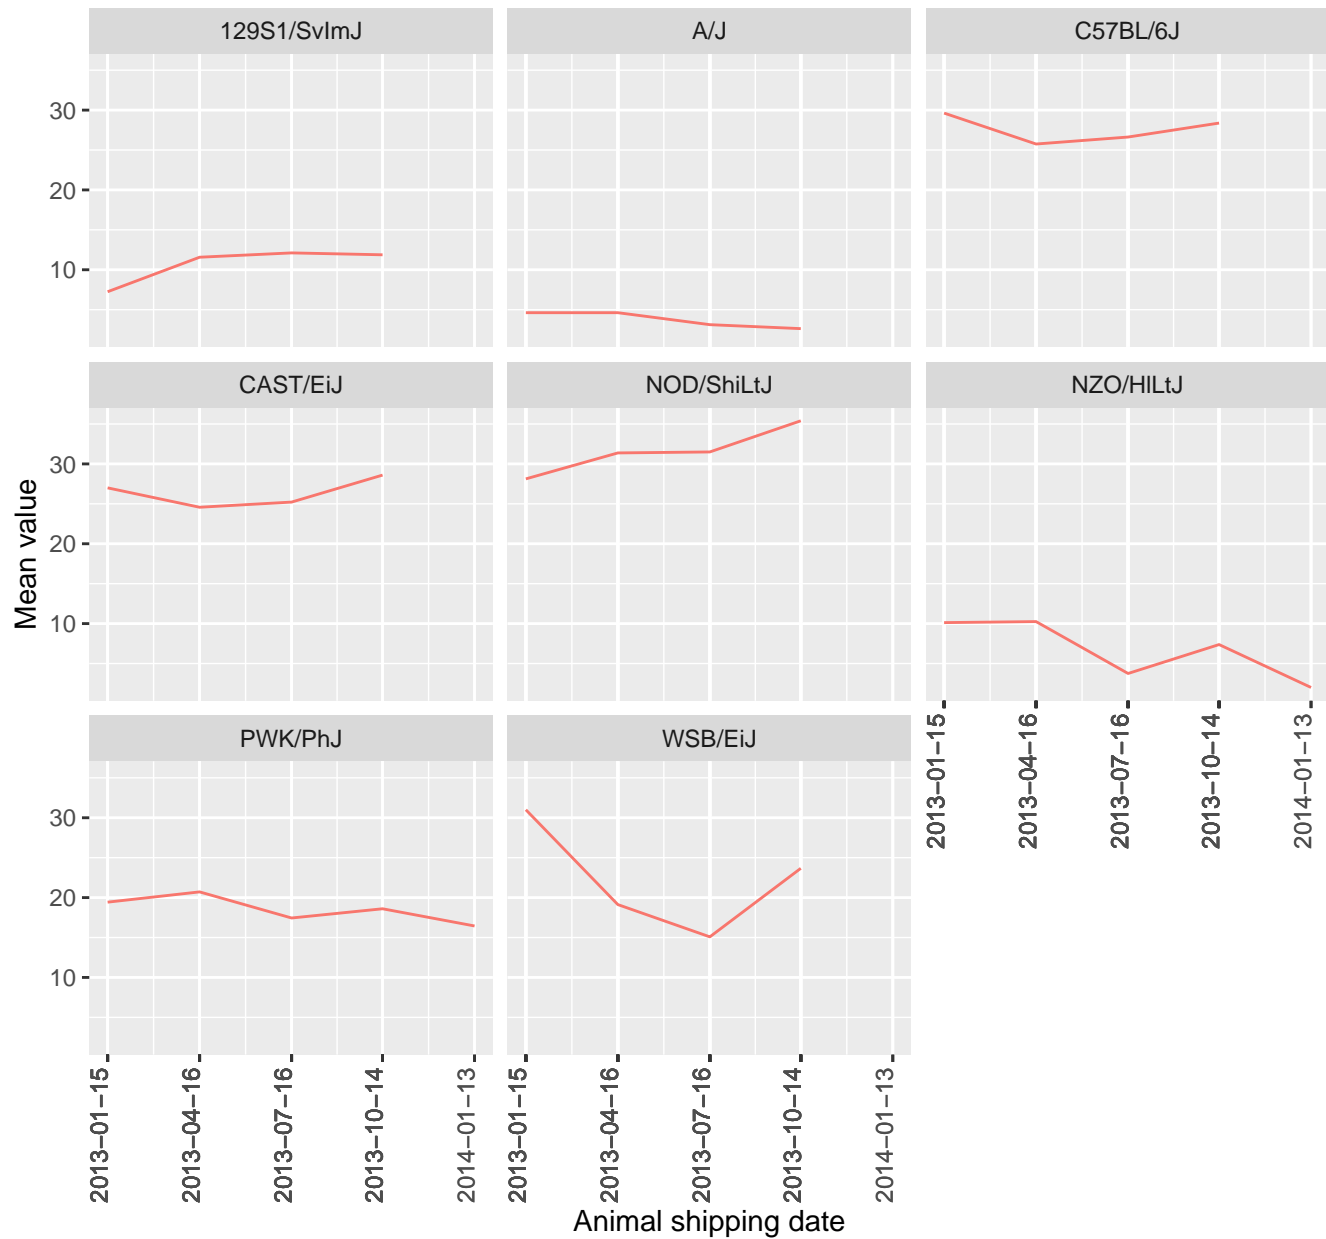

Procedure: GMC03

Parameter: num\_mice\_per\_cage

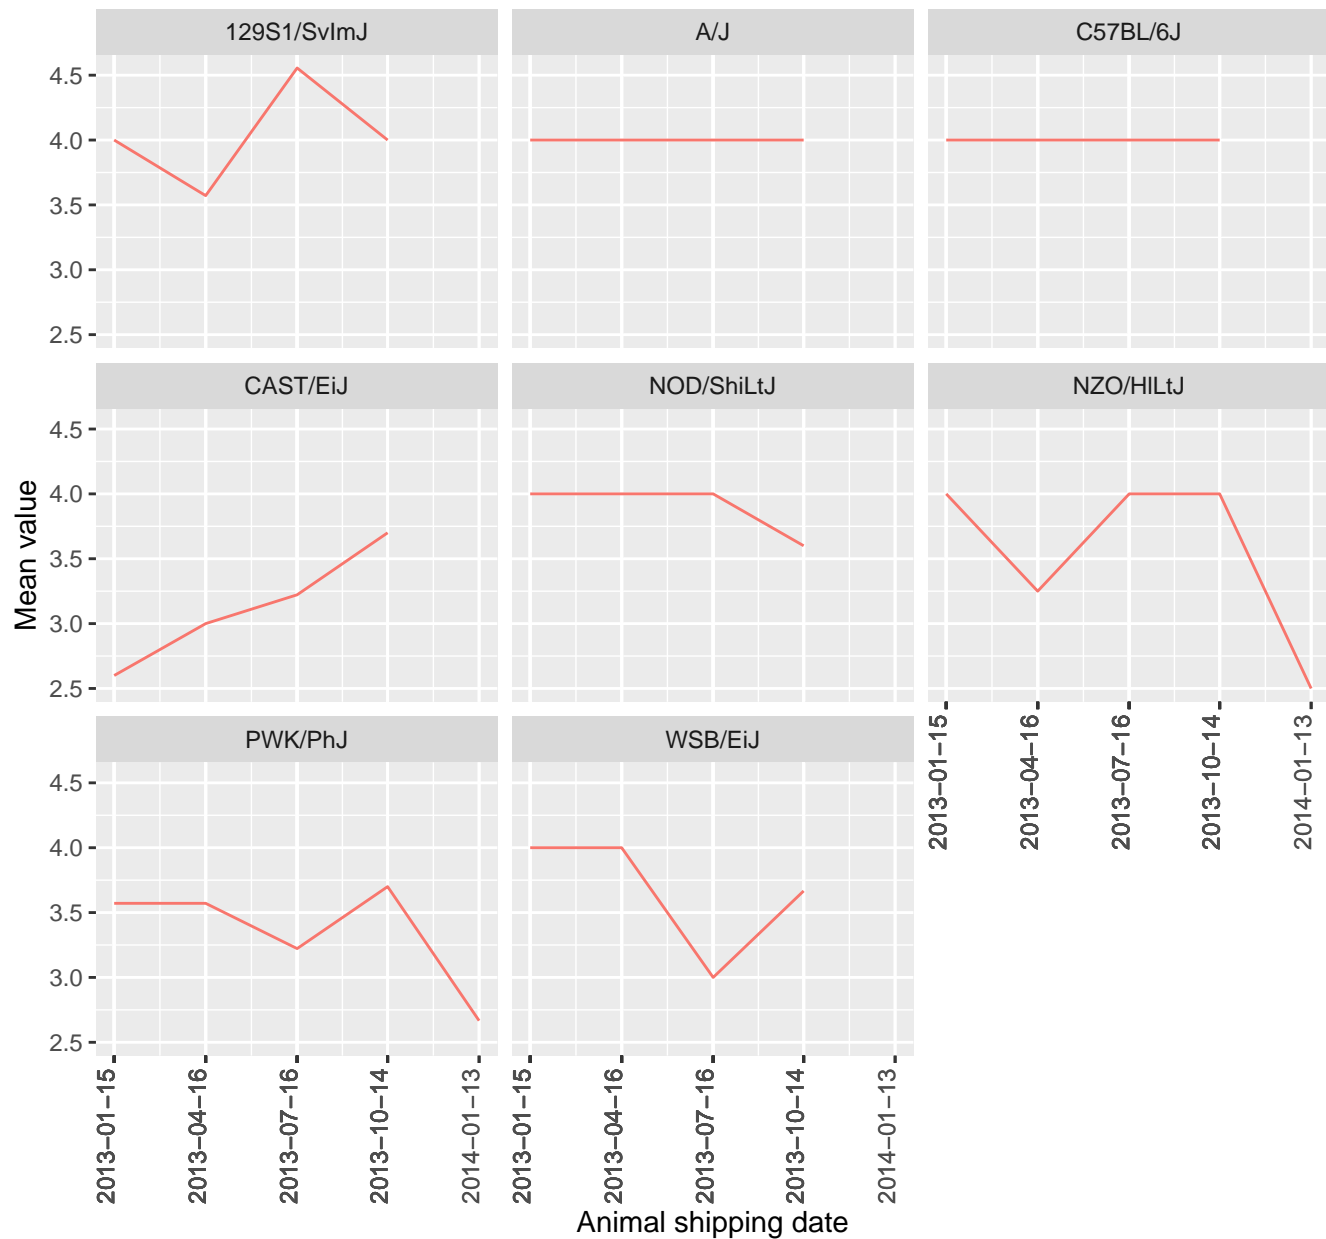

Procedure: GMC03

Parameter: palebral\_closure

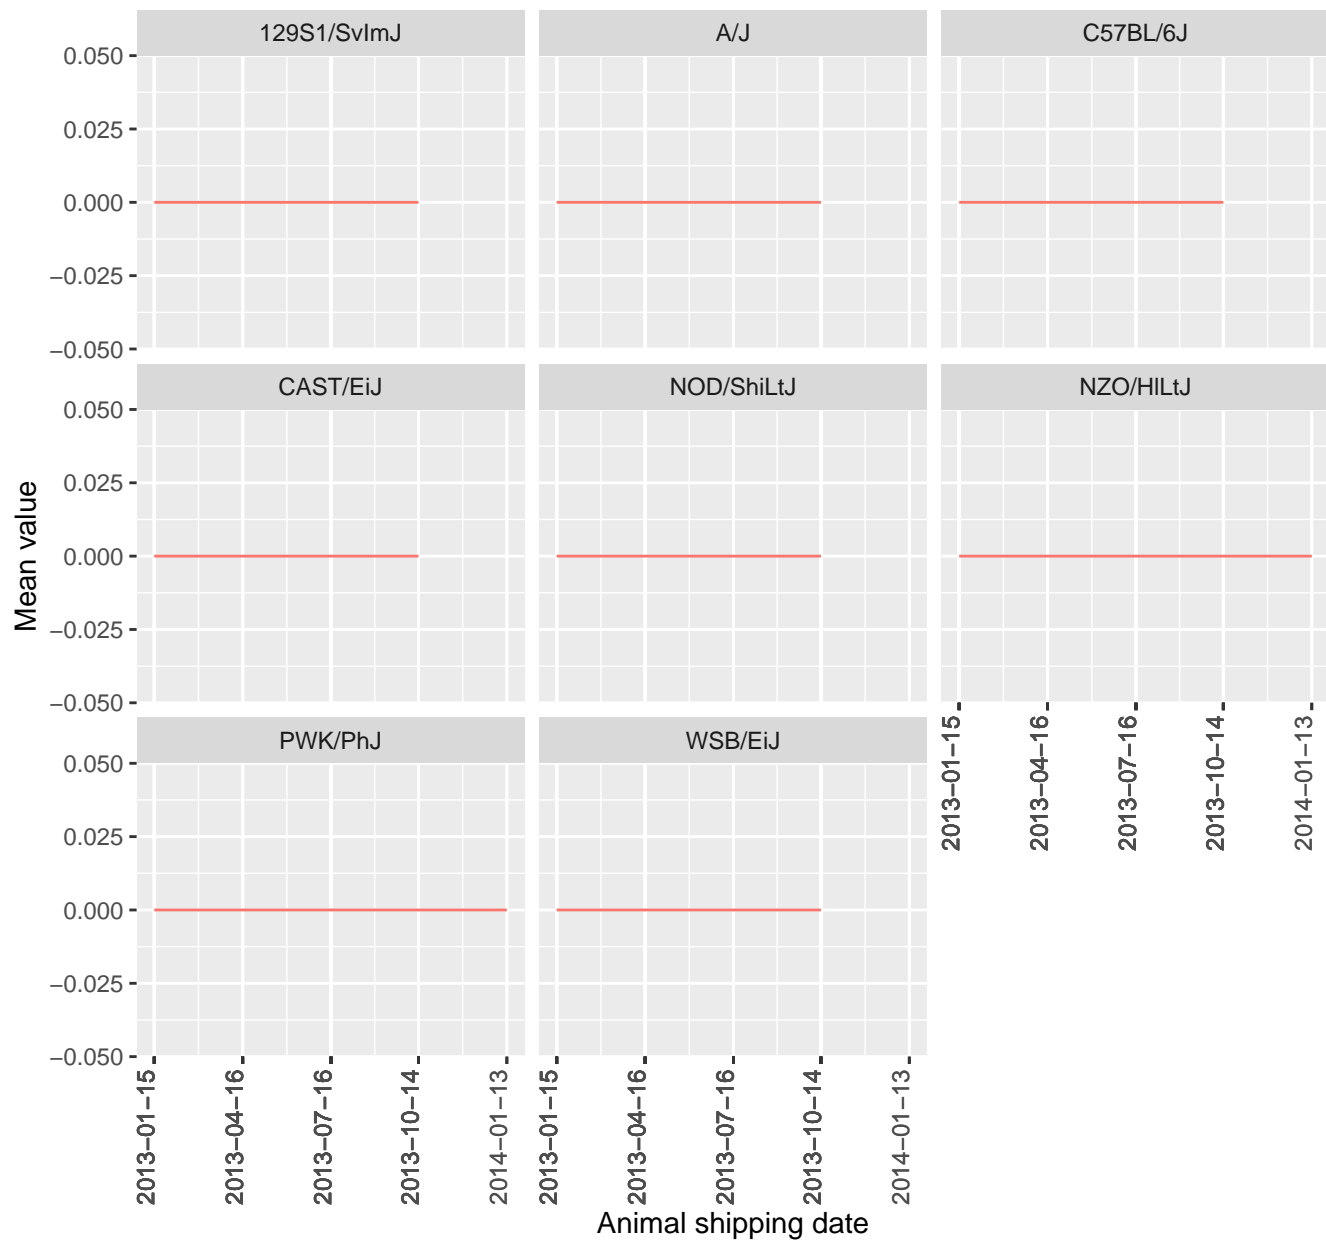

Procedure: GMC03  
Parameter: pelvic\_elev

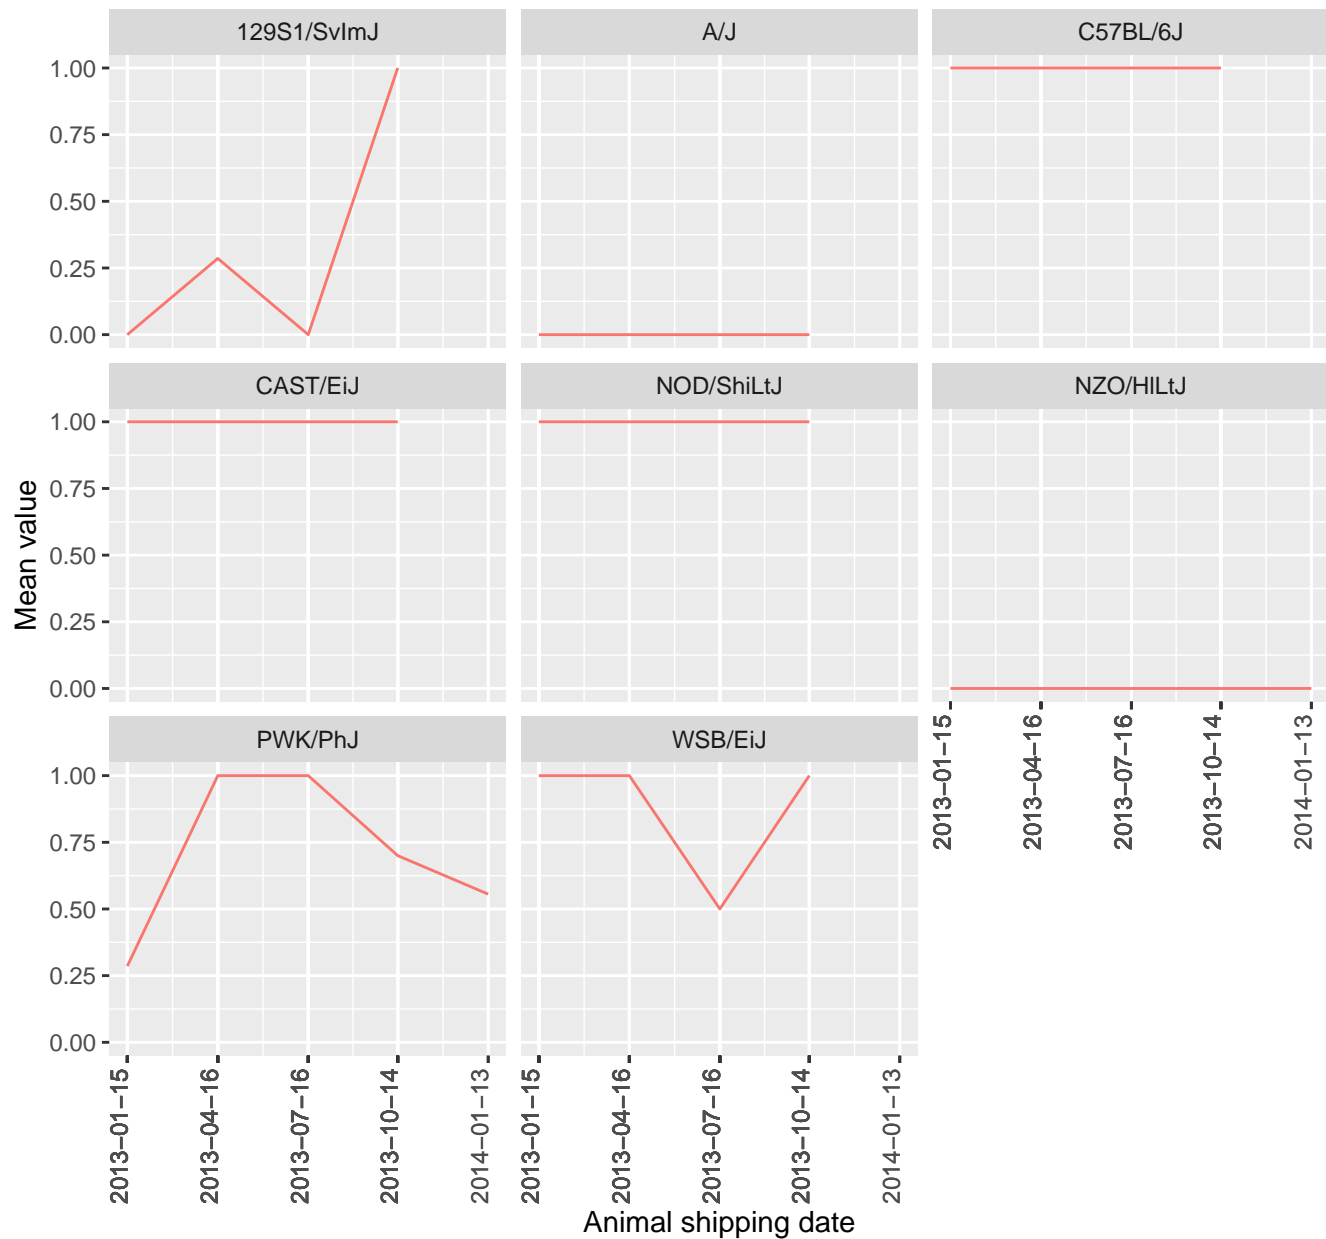

Procedure: GMC03

Parameter: pinna\_reflex

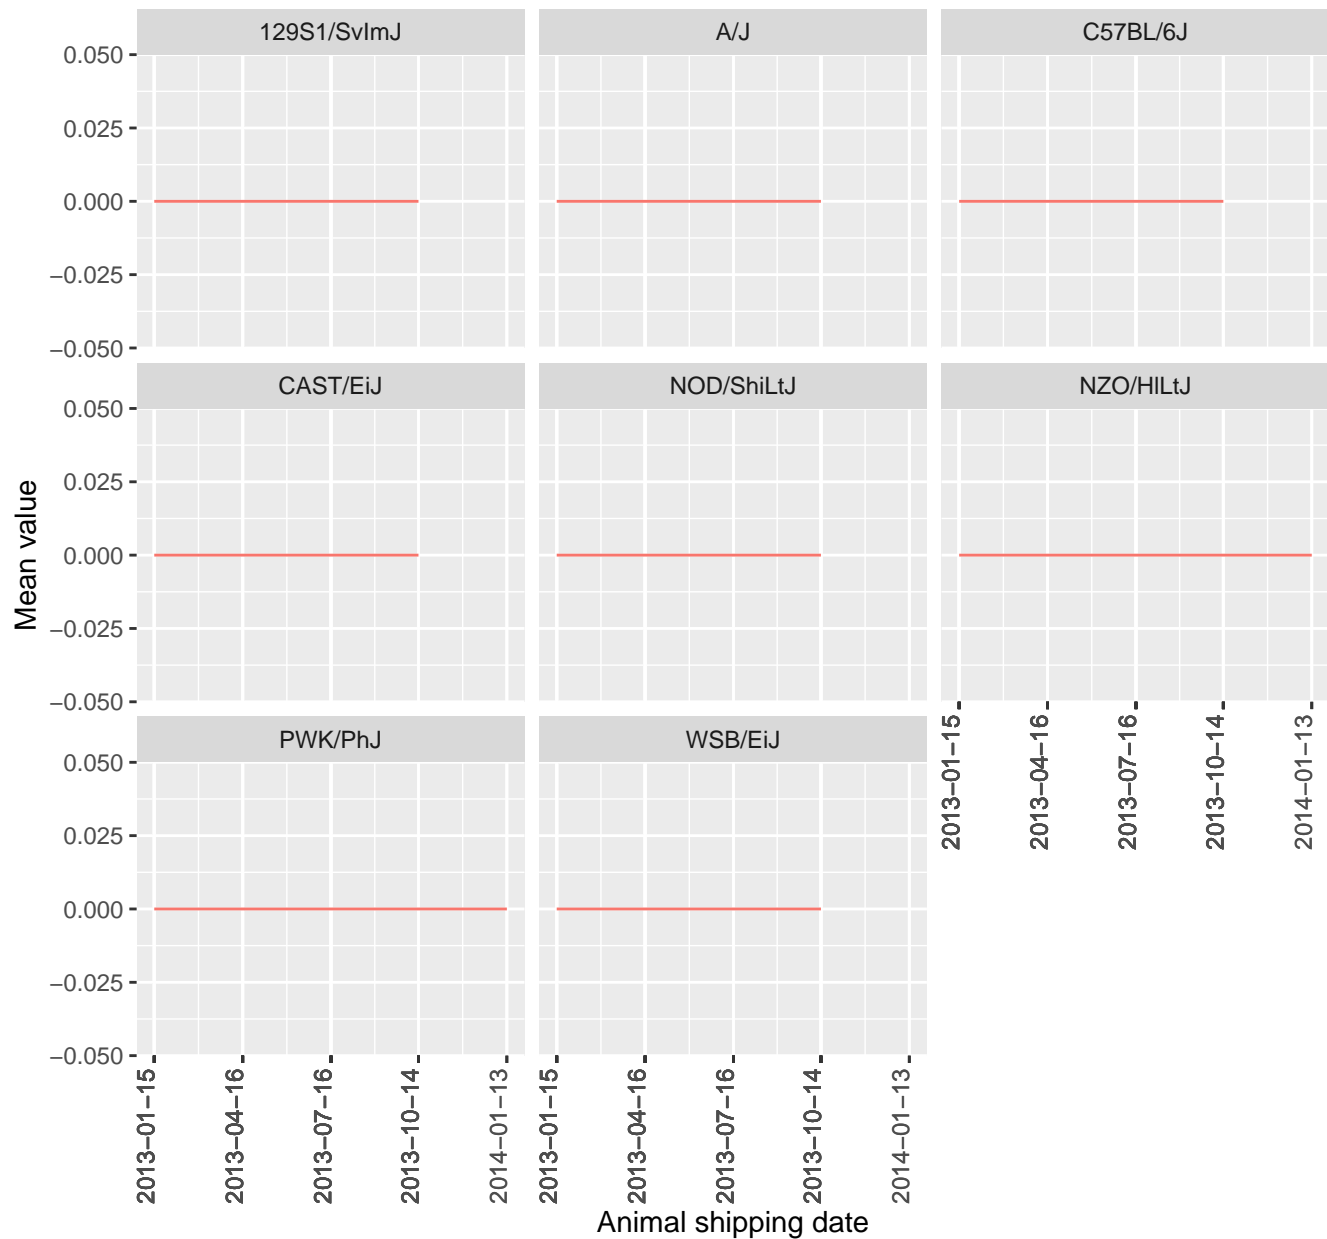



Procedure: GMC03  
Parameter: pos\_pass



Procedure: GMC03

Parameter: righting\_reflex



Procedure: GMC03  
Parameter: startle\_response

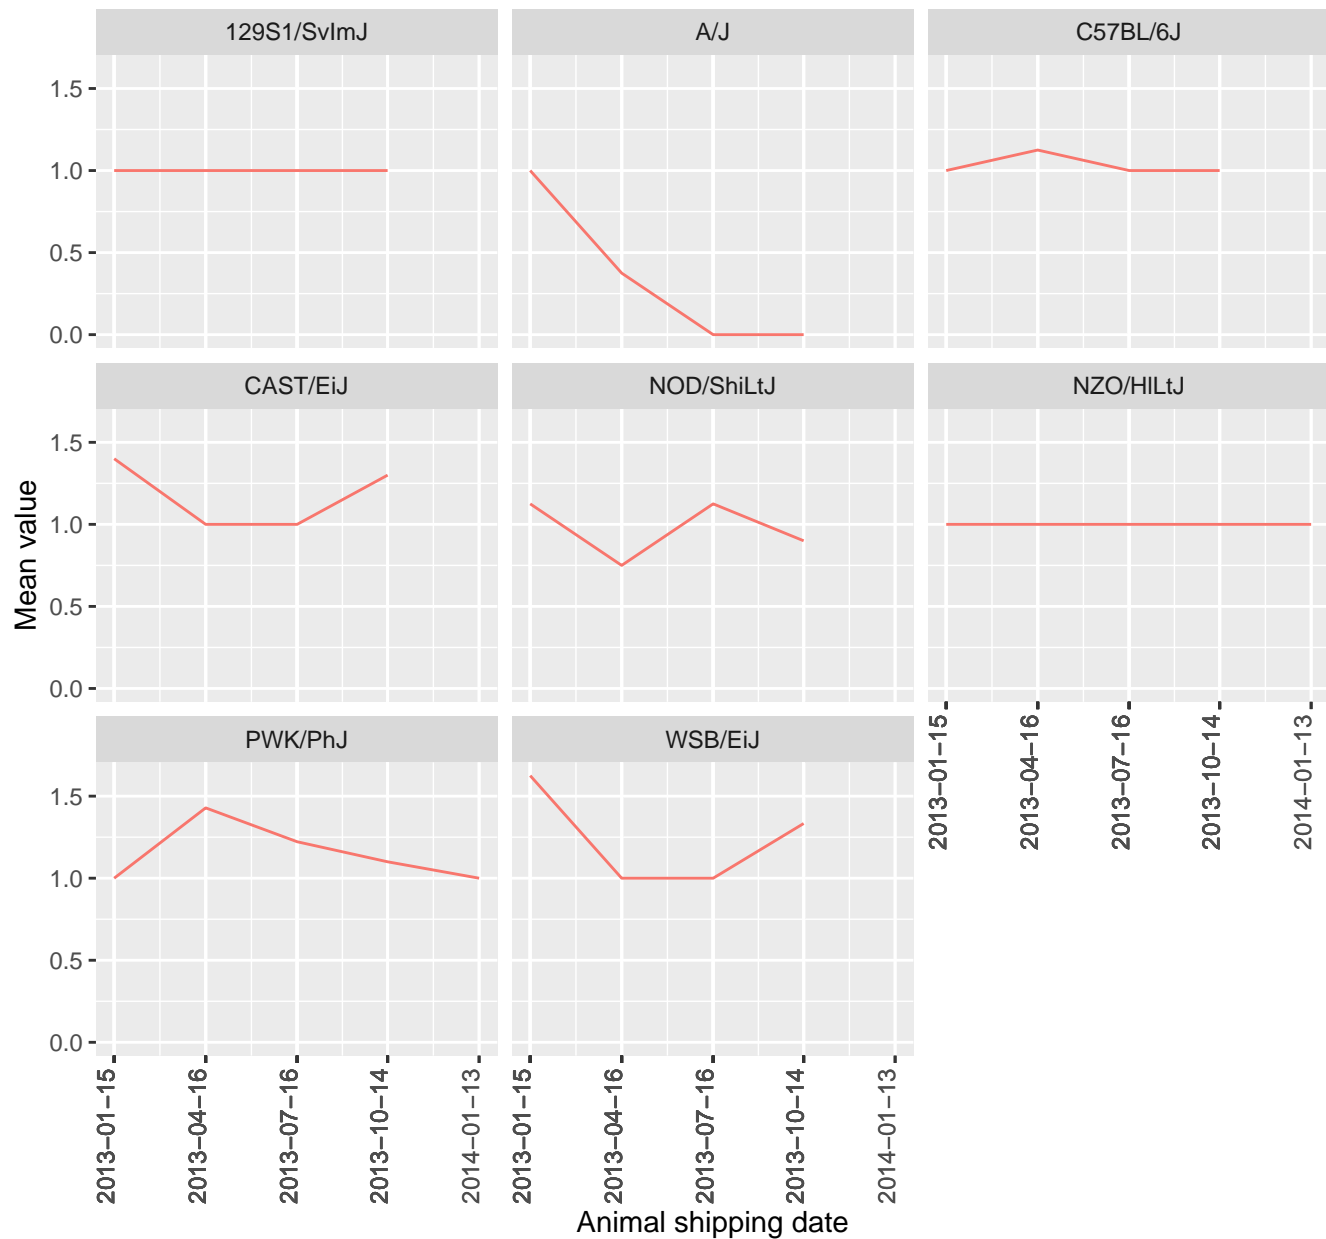

Procedure: GMC03  
Parameter: tail\_elev

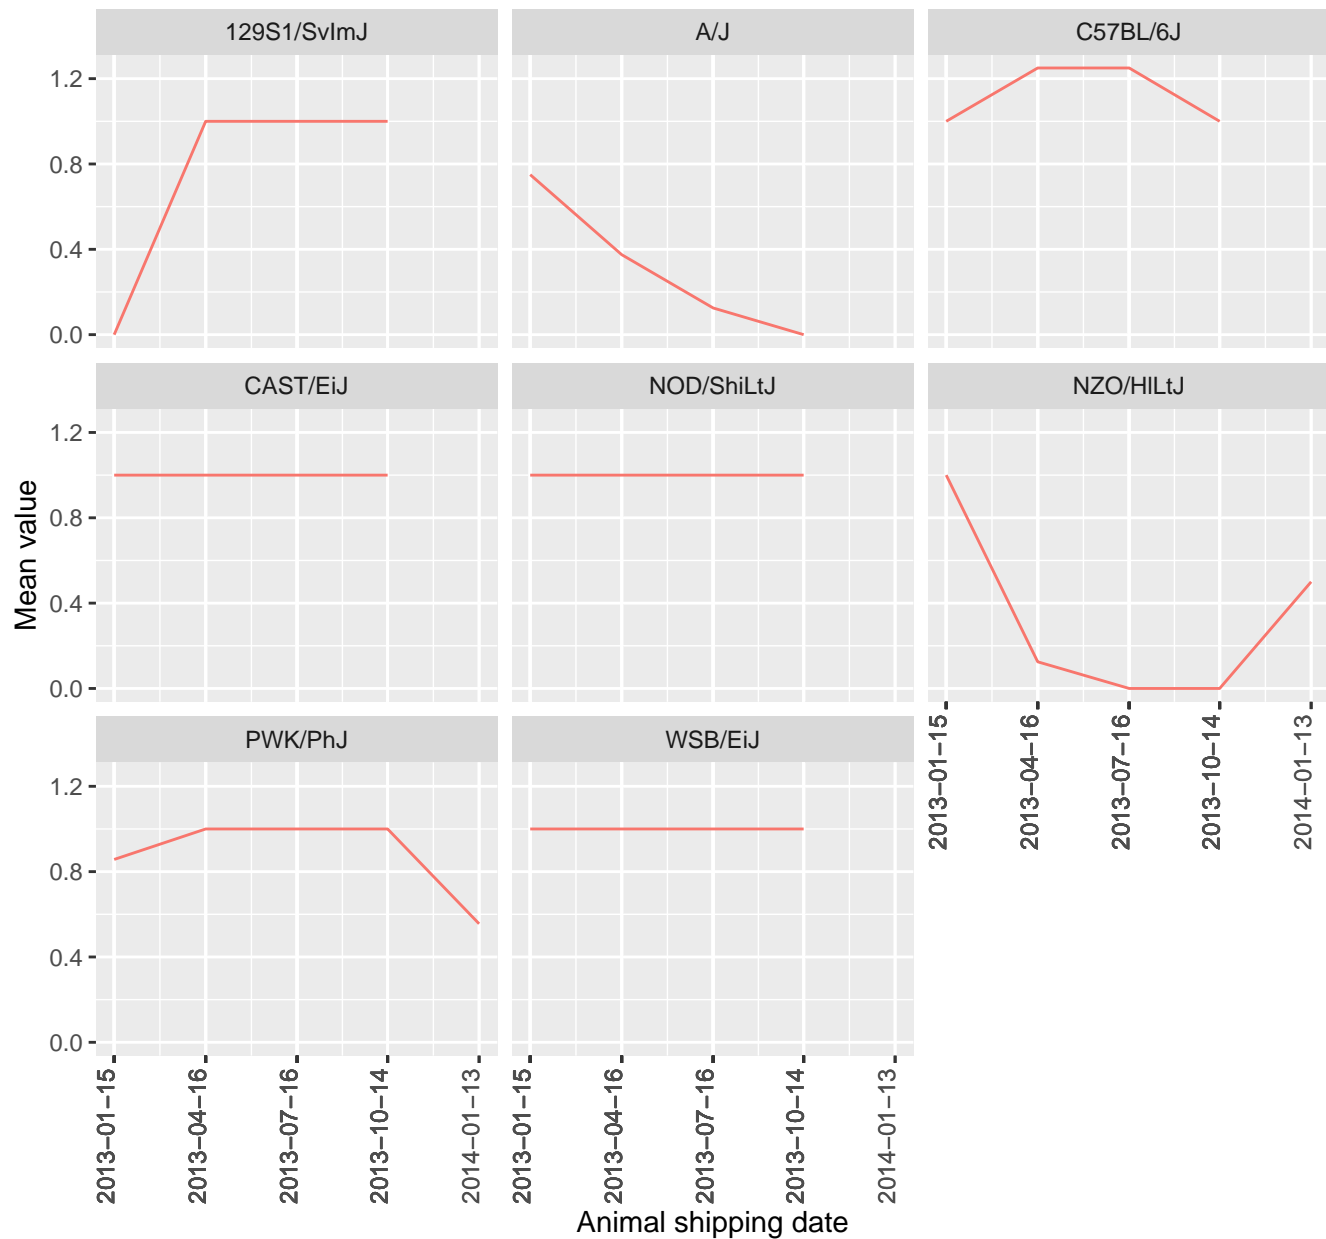

Procedure: GMC03  
Parameter: touch\_escape

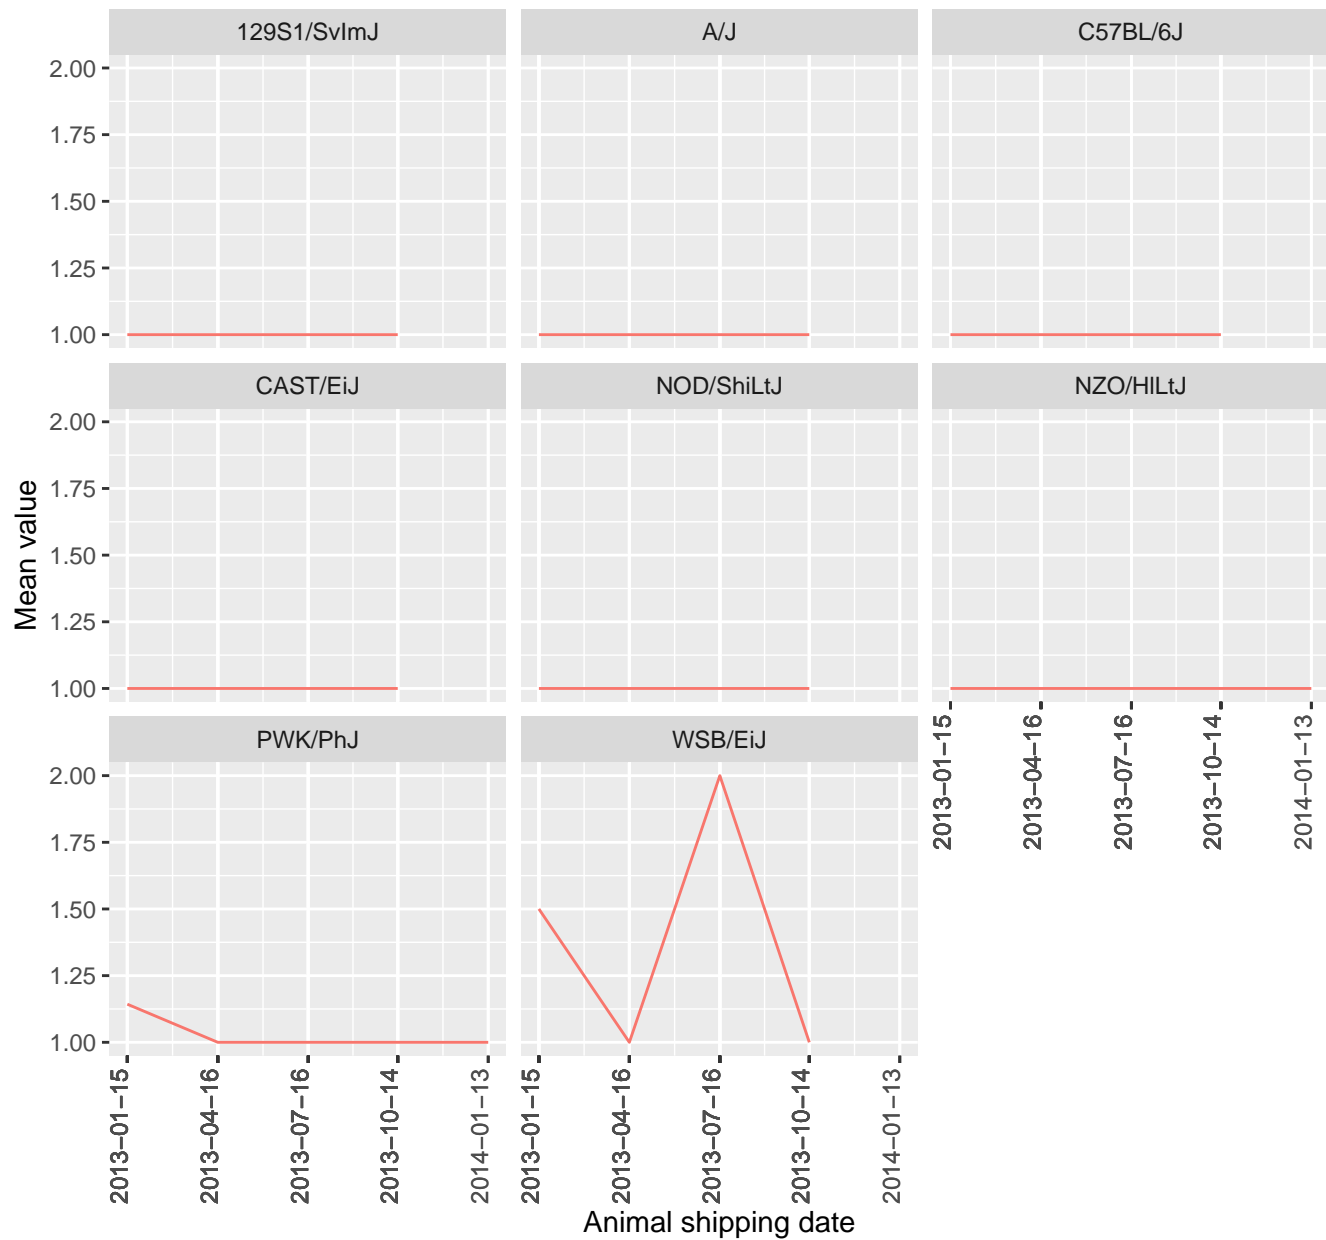

Procedure: GMC03  
Parameter: transfer\_arousal

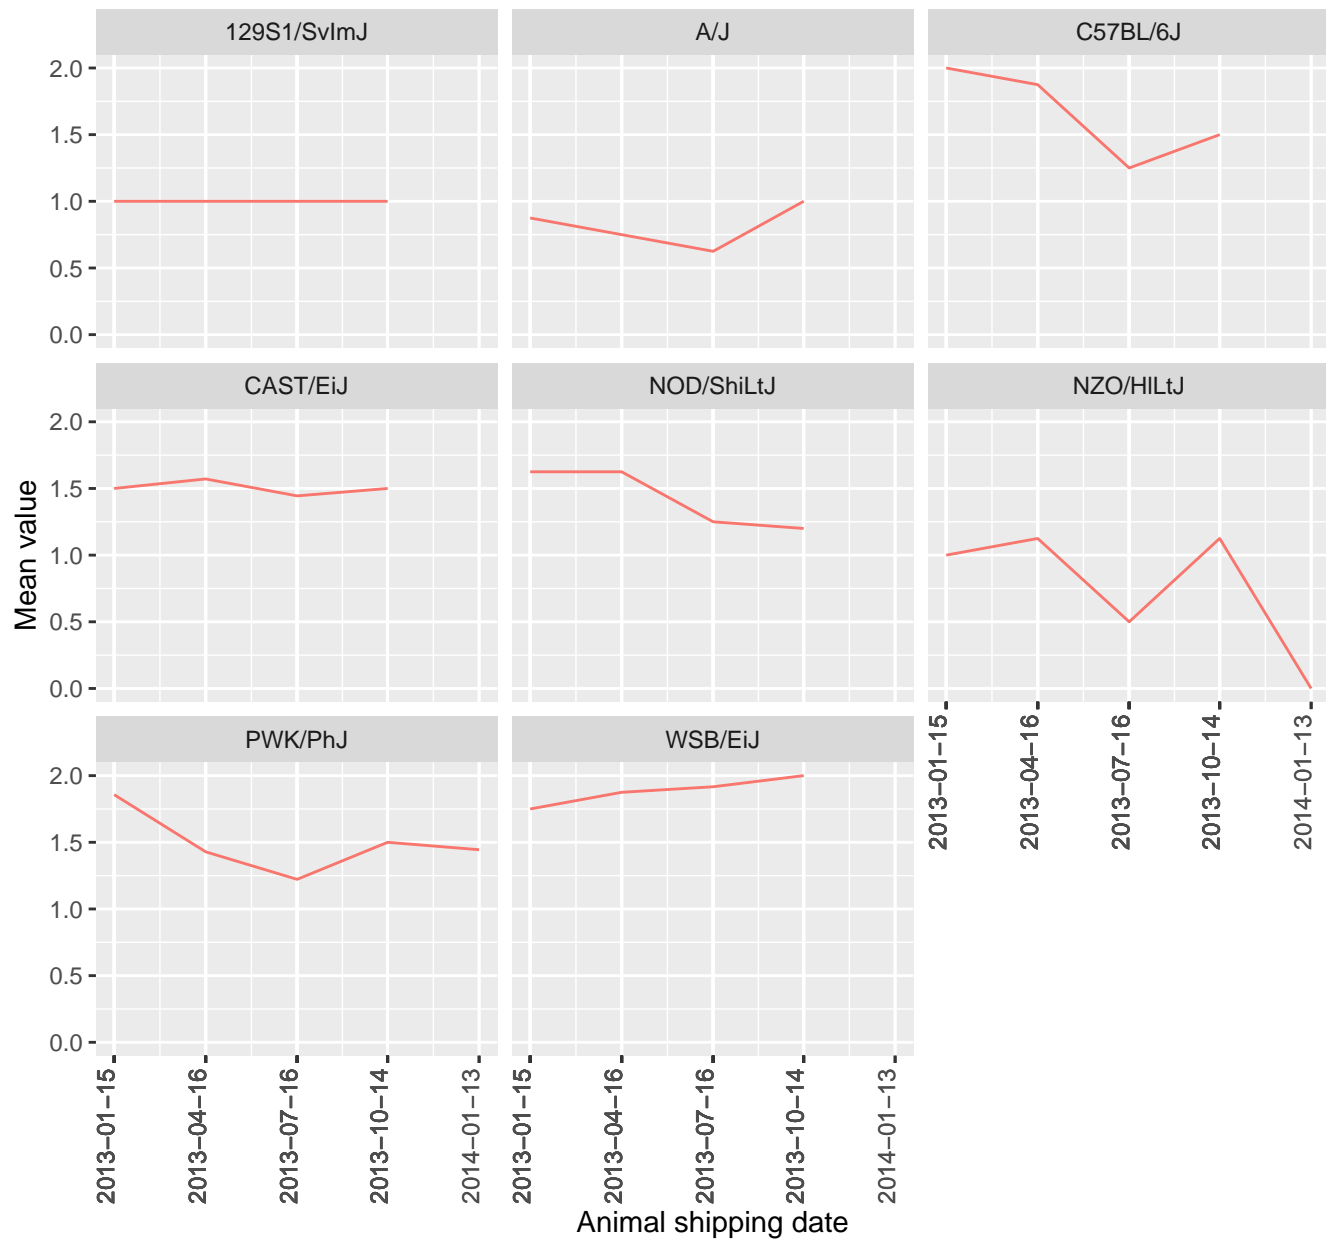

Procedure: GMC03

Parameter: tremor

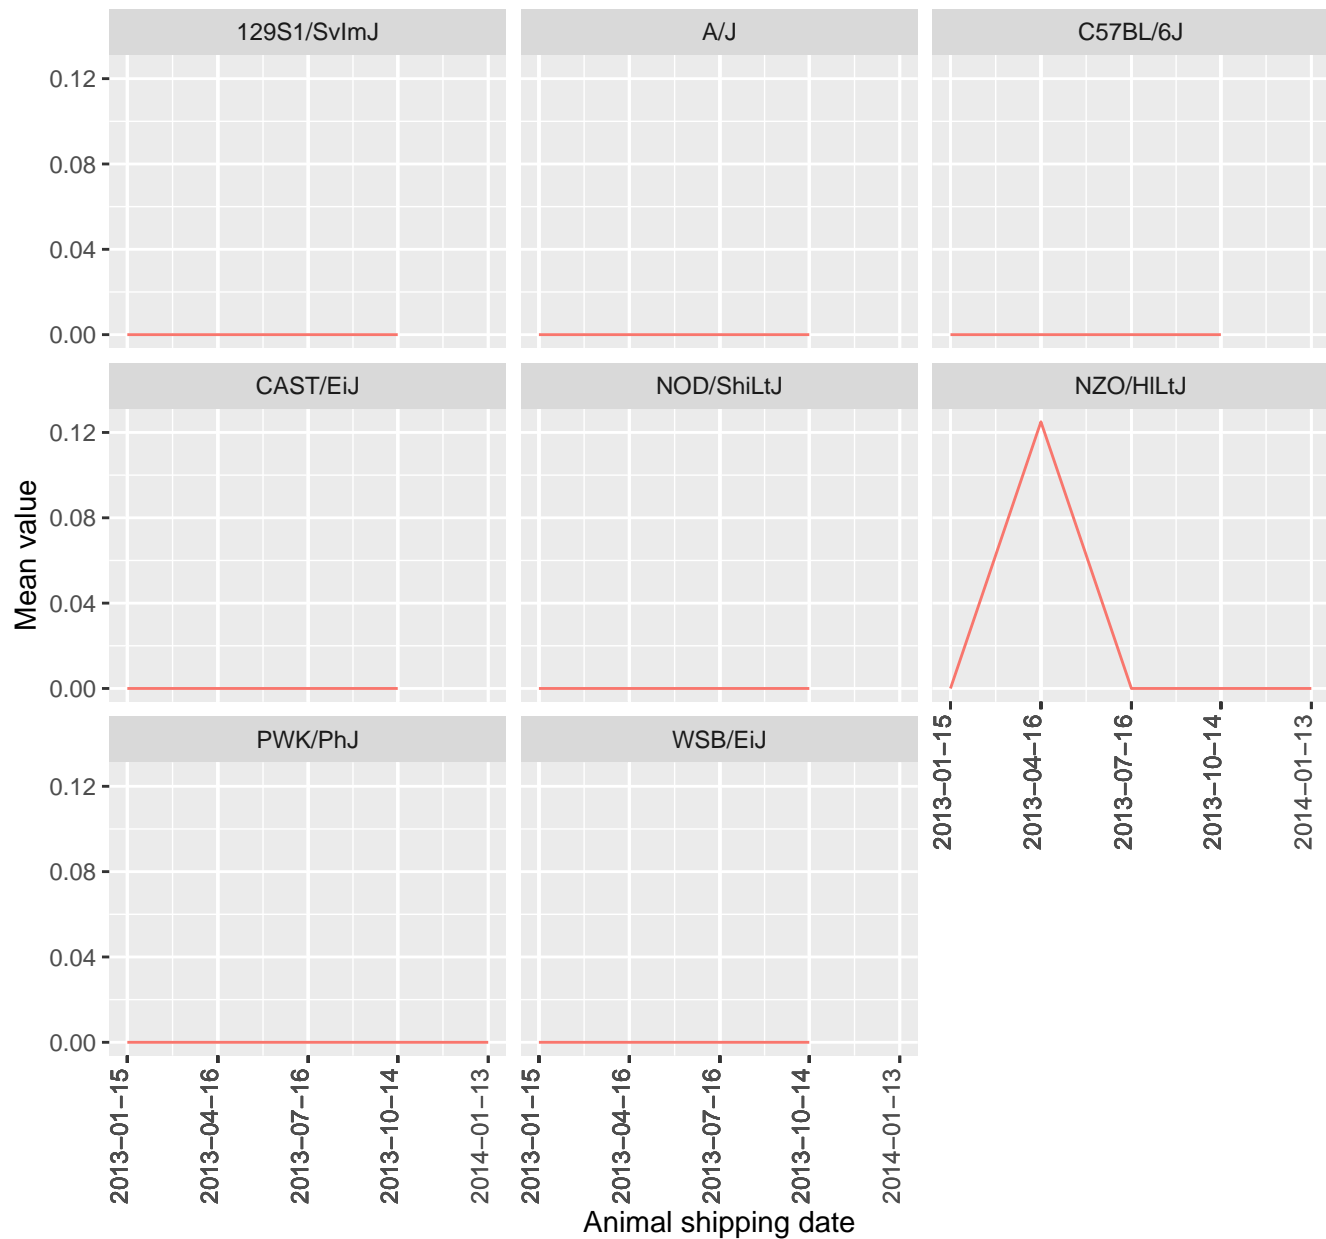

Procedure: GMC03  
Parameter: trunk\_curl





Procedure: GMC03  
Parameter: urinate

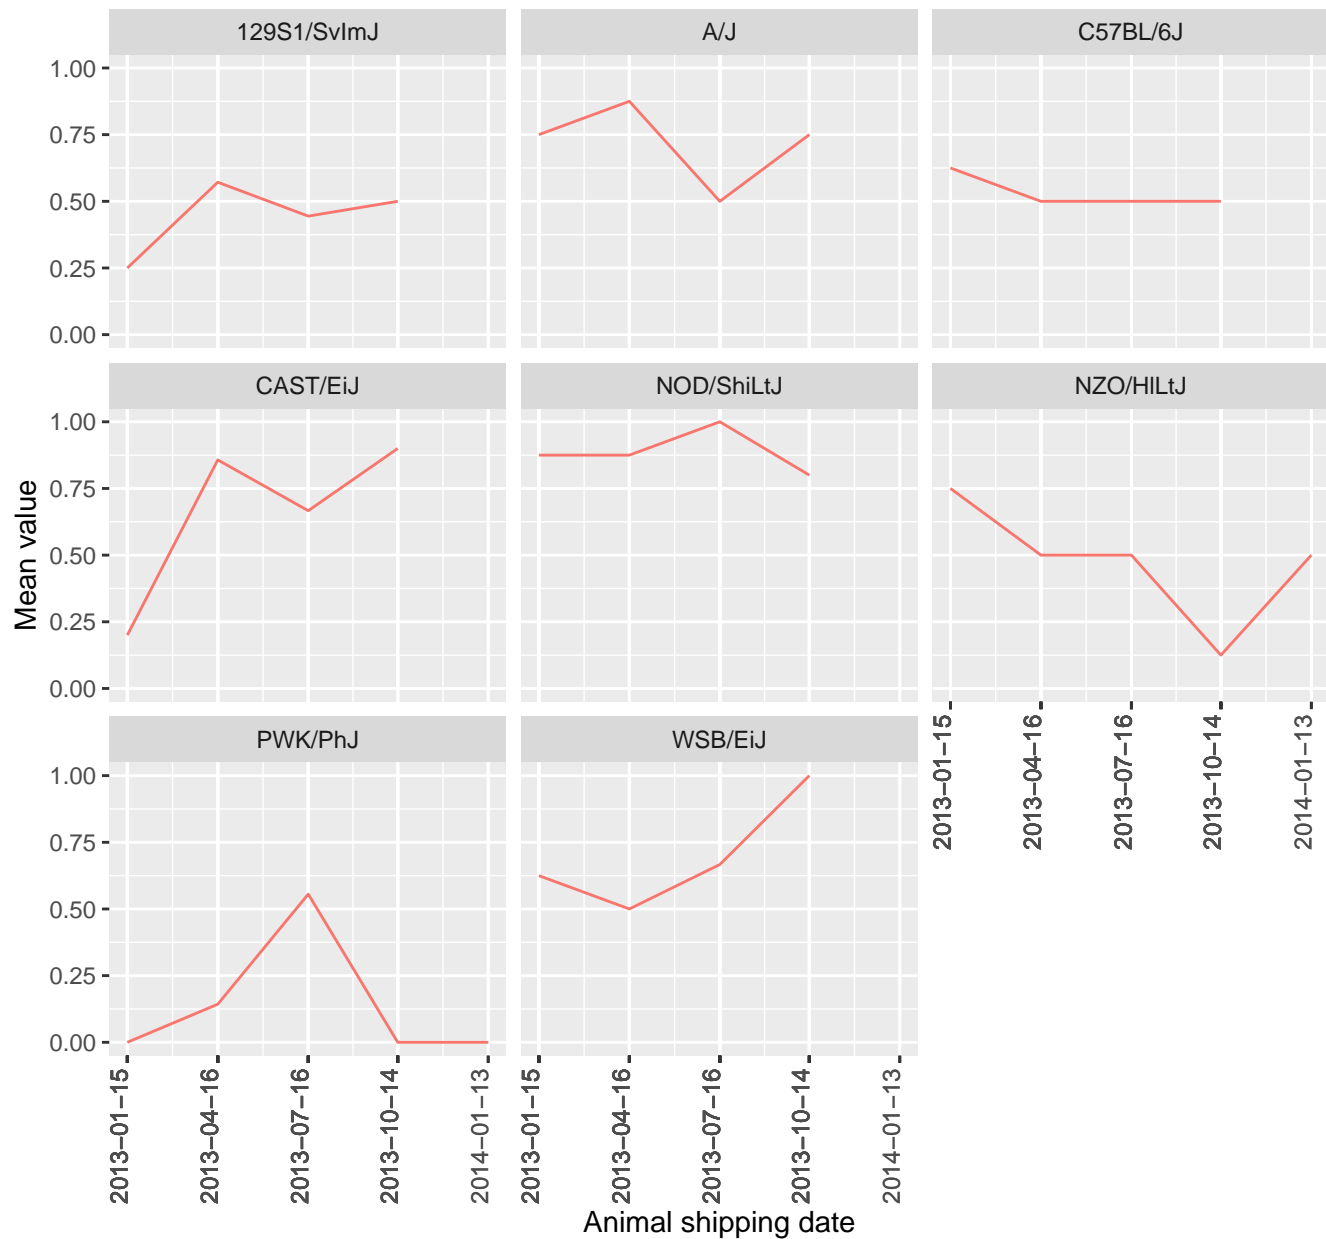

Procedure: GMC03  
Parameter: vocalization

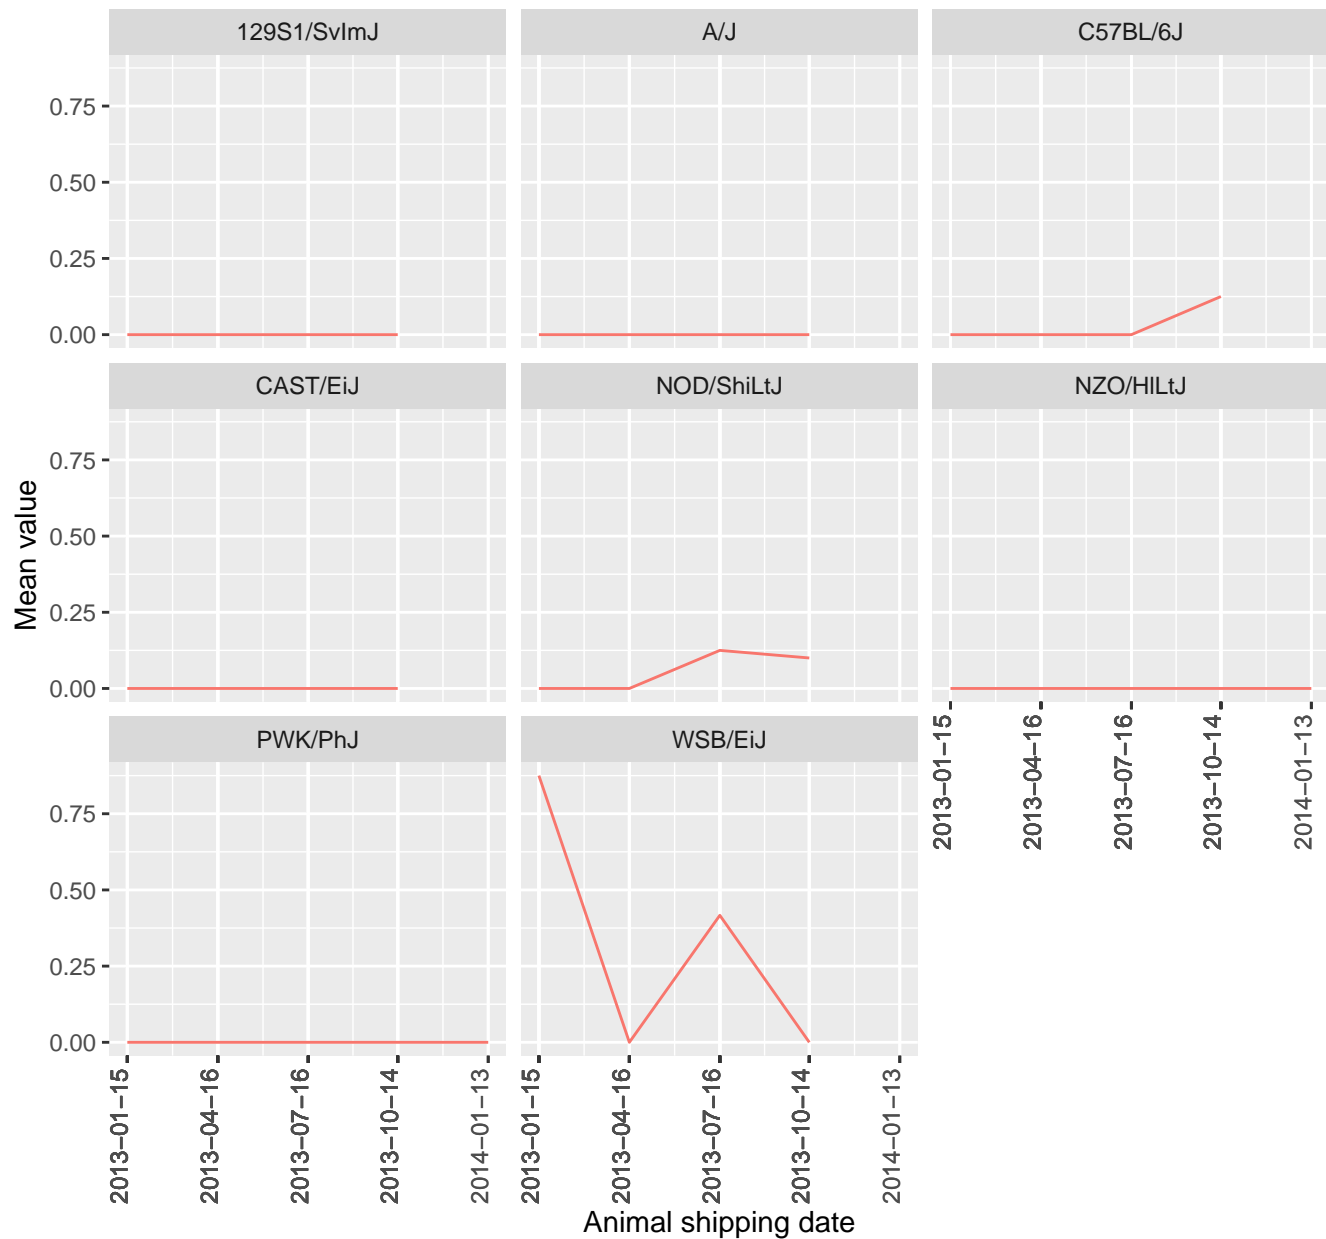

Procedure: GMC03  
Parameter: whiskers

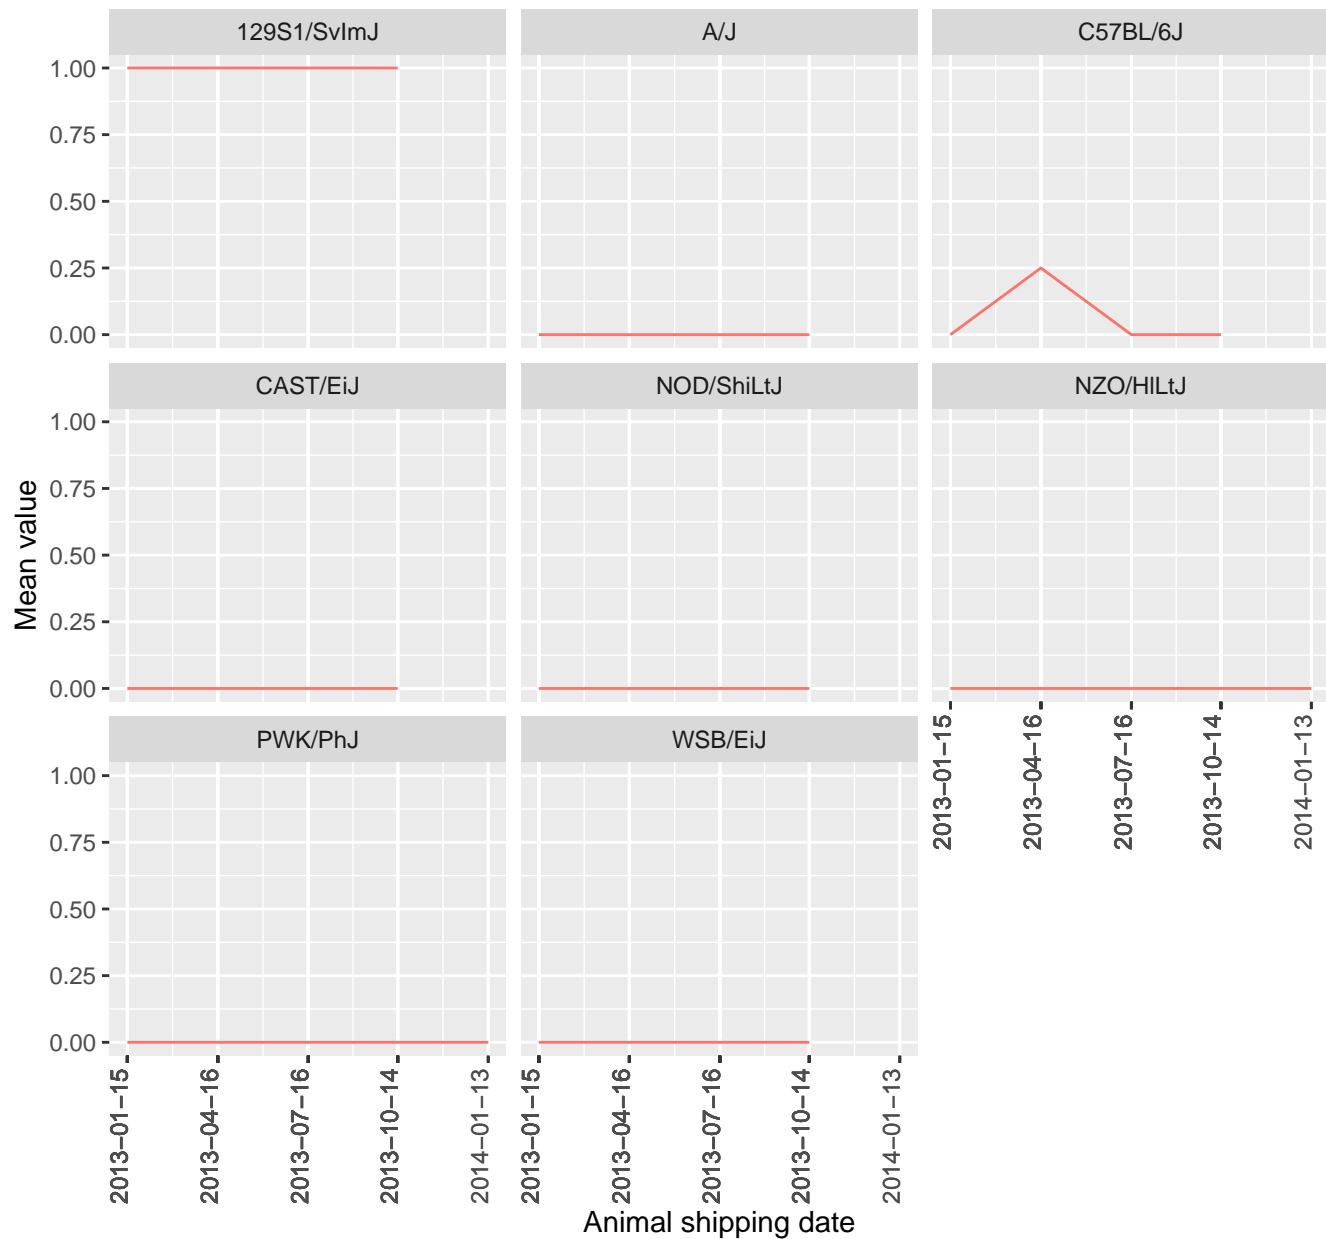

Procedure: GMC04  
Parameter: LatFall\_1

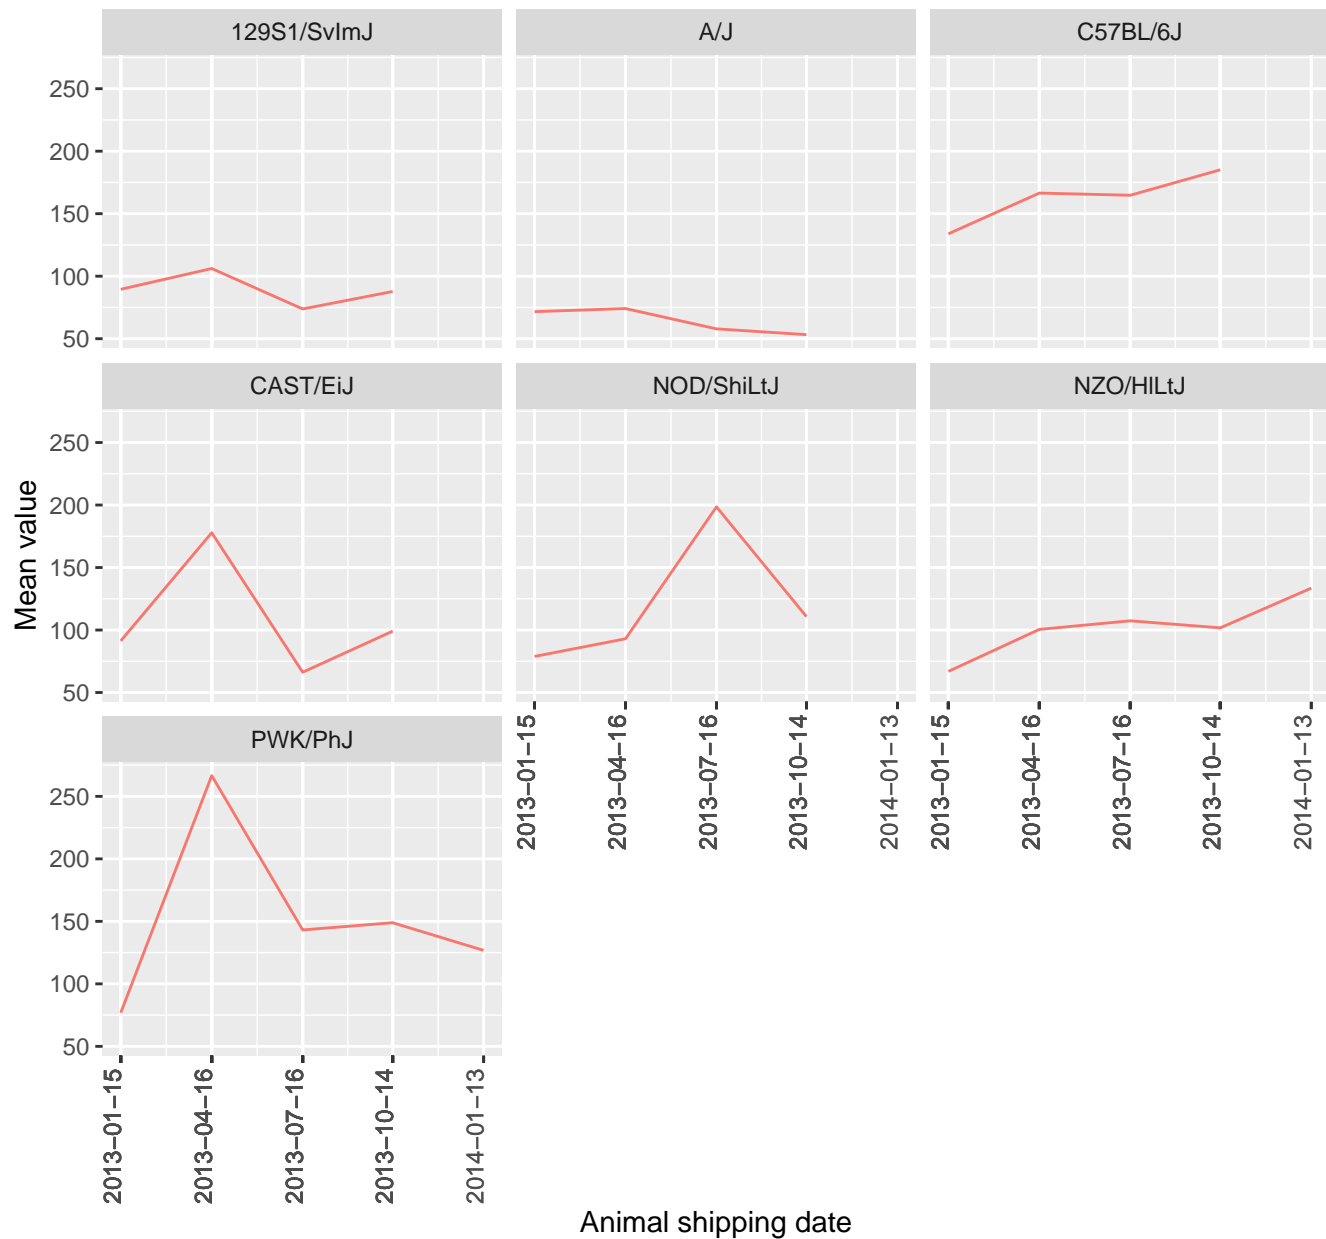

Procedure: GMC04  
Parameter: LatFall\_2

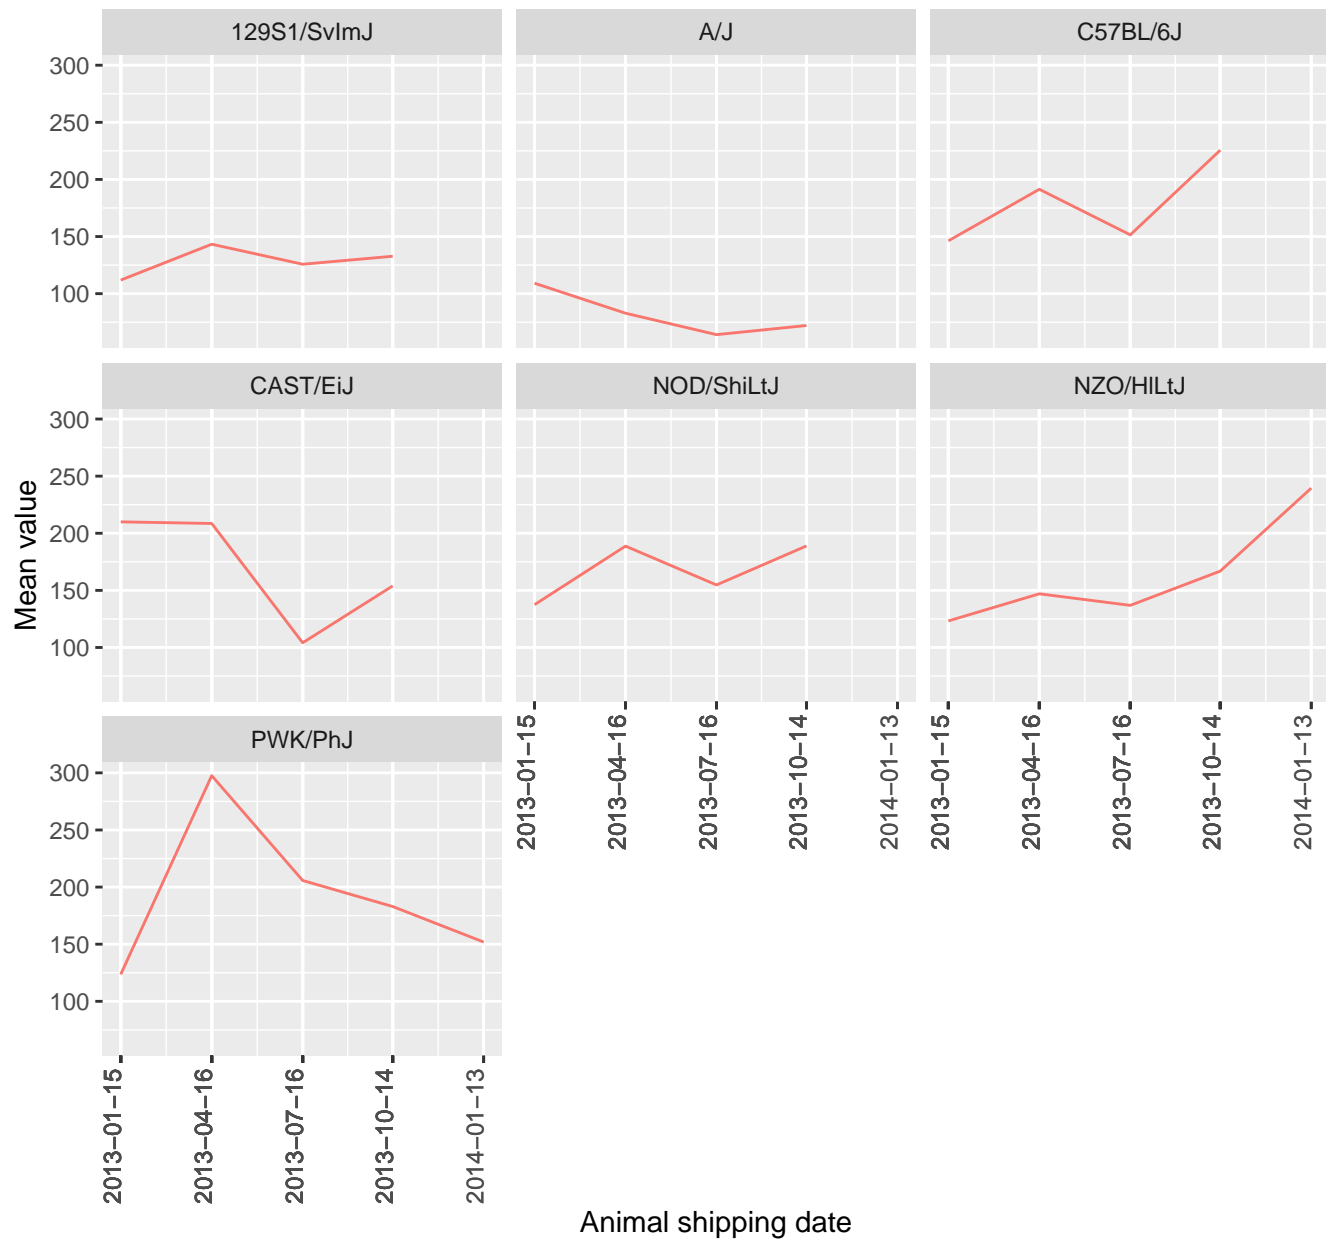

Procedure: GMC04  
Parameter: LatFall\_3

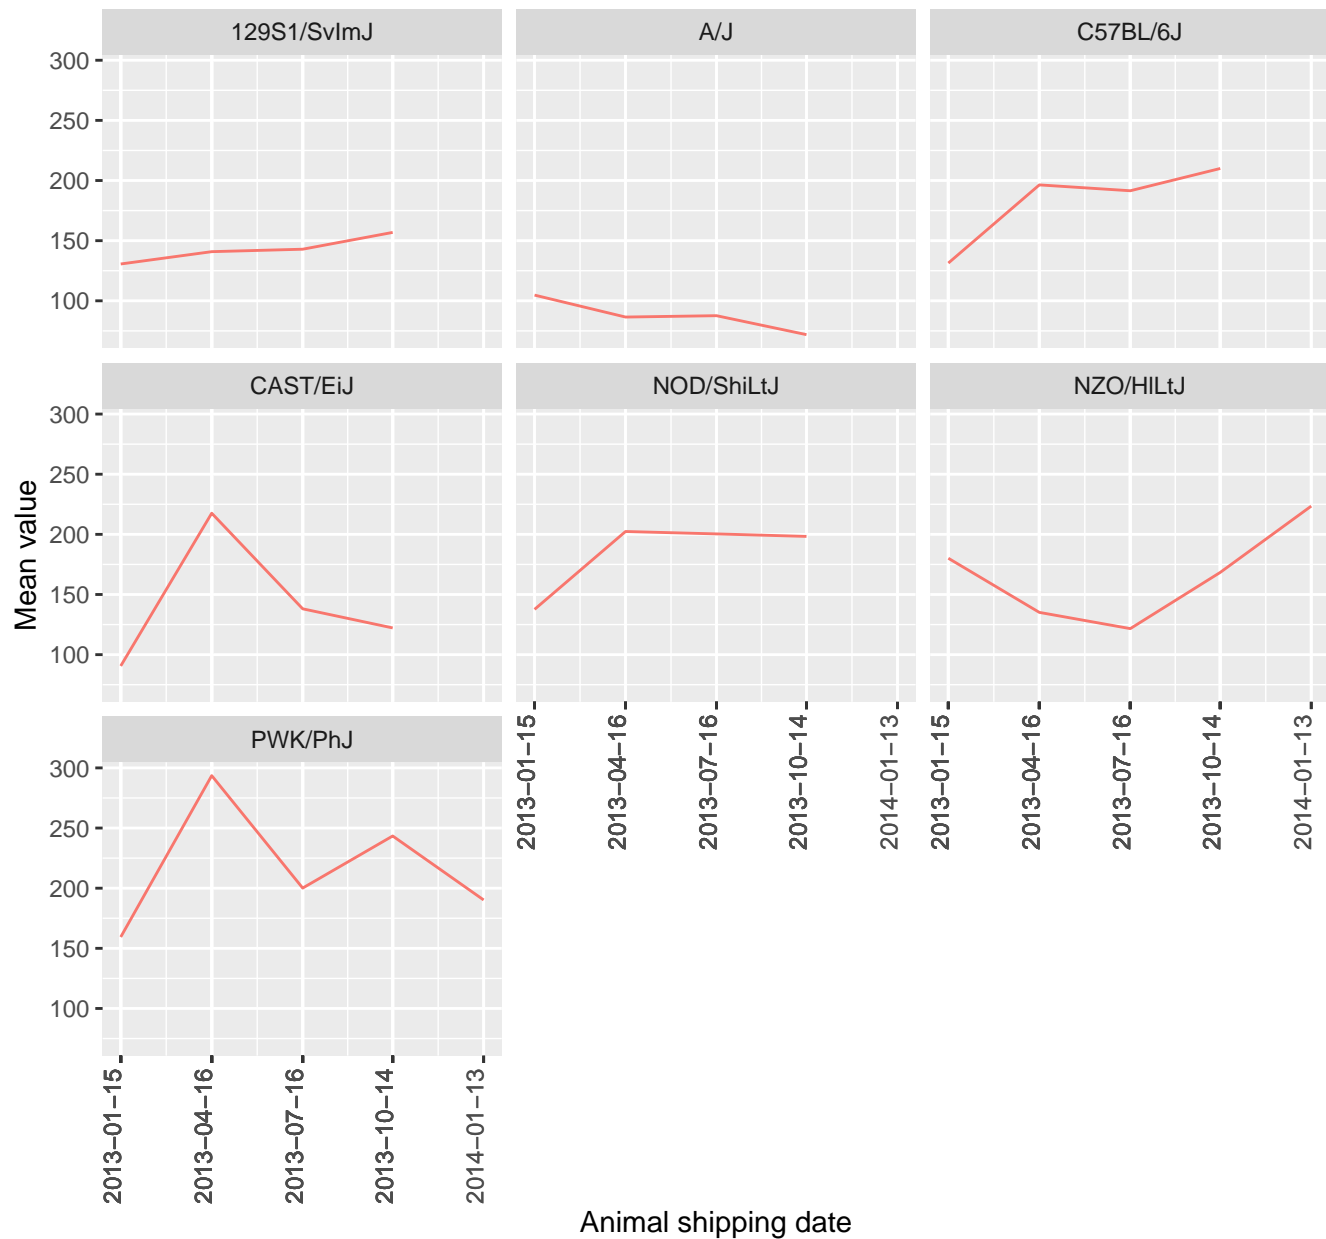

Procedure: GMC04  
Parameter: LatFall\_mean

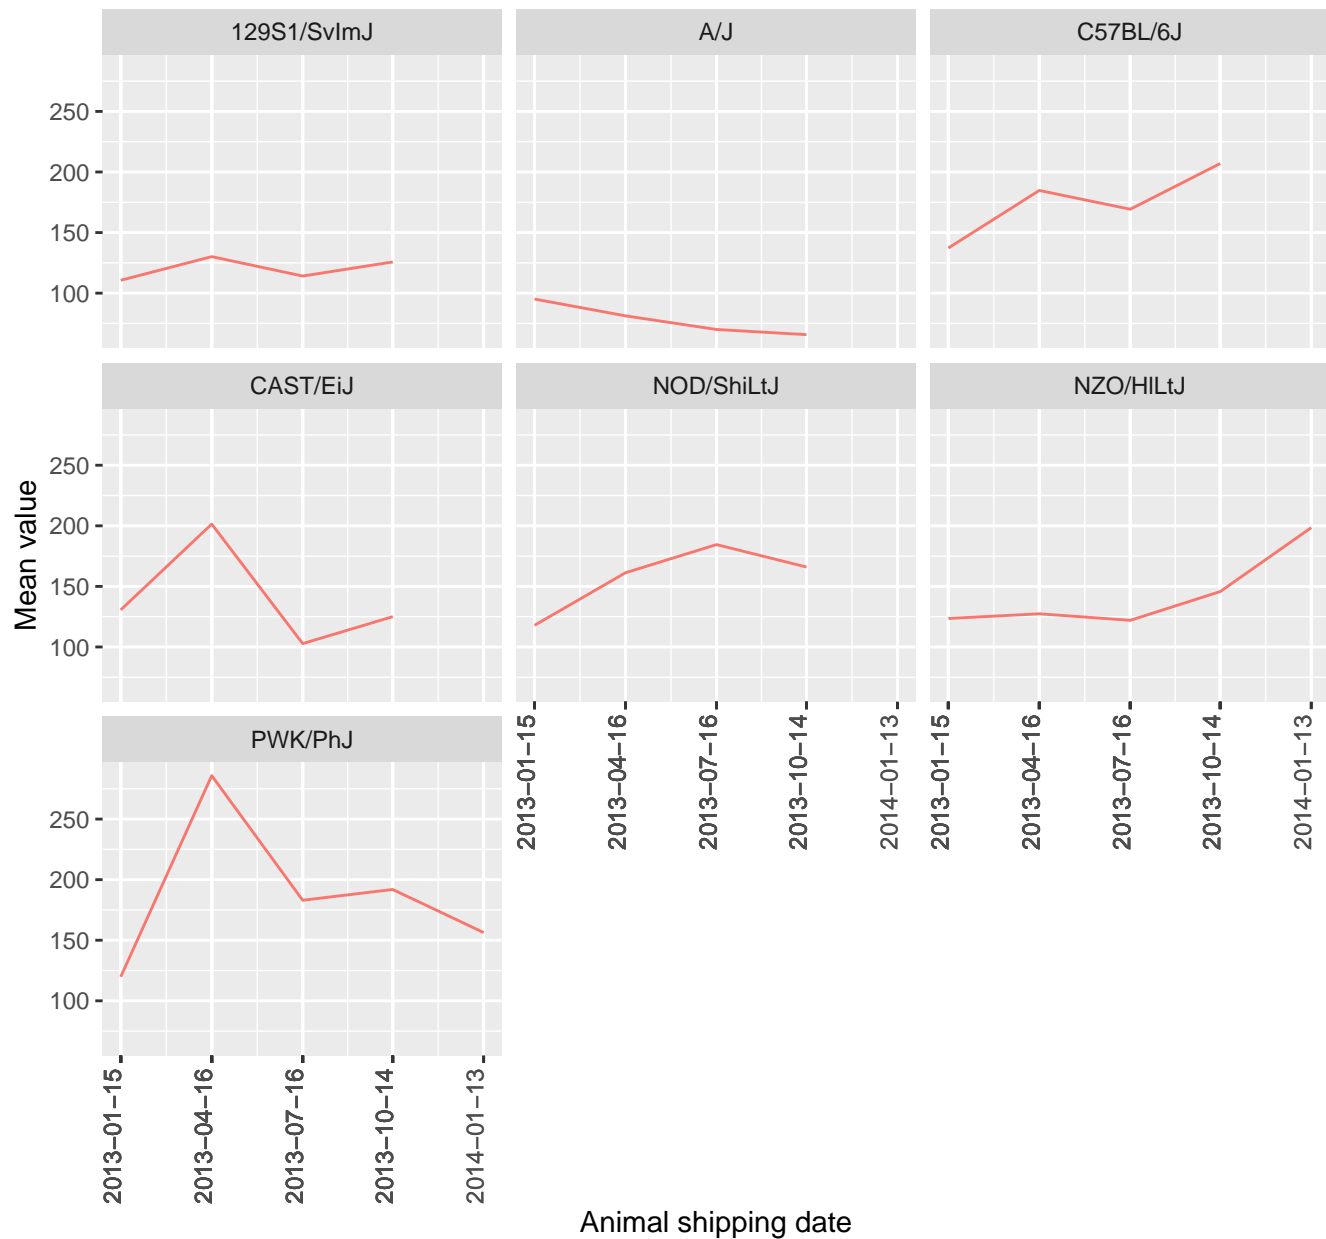

Procedure: GMC04

Parameter: num\_mice\_on\_rotarod

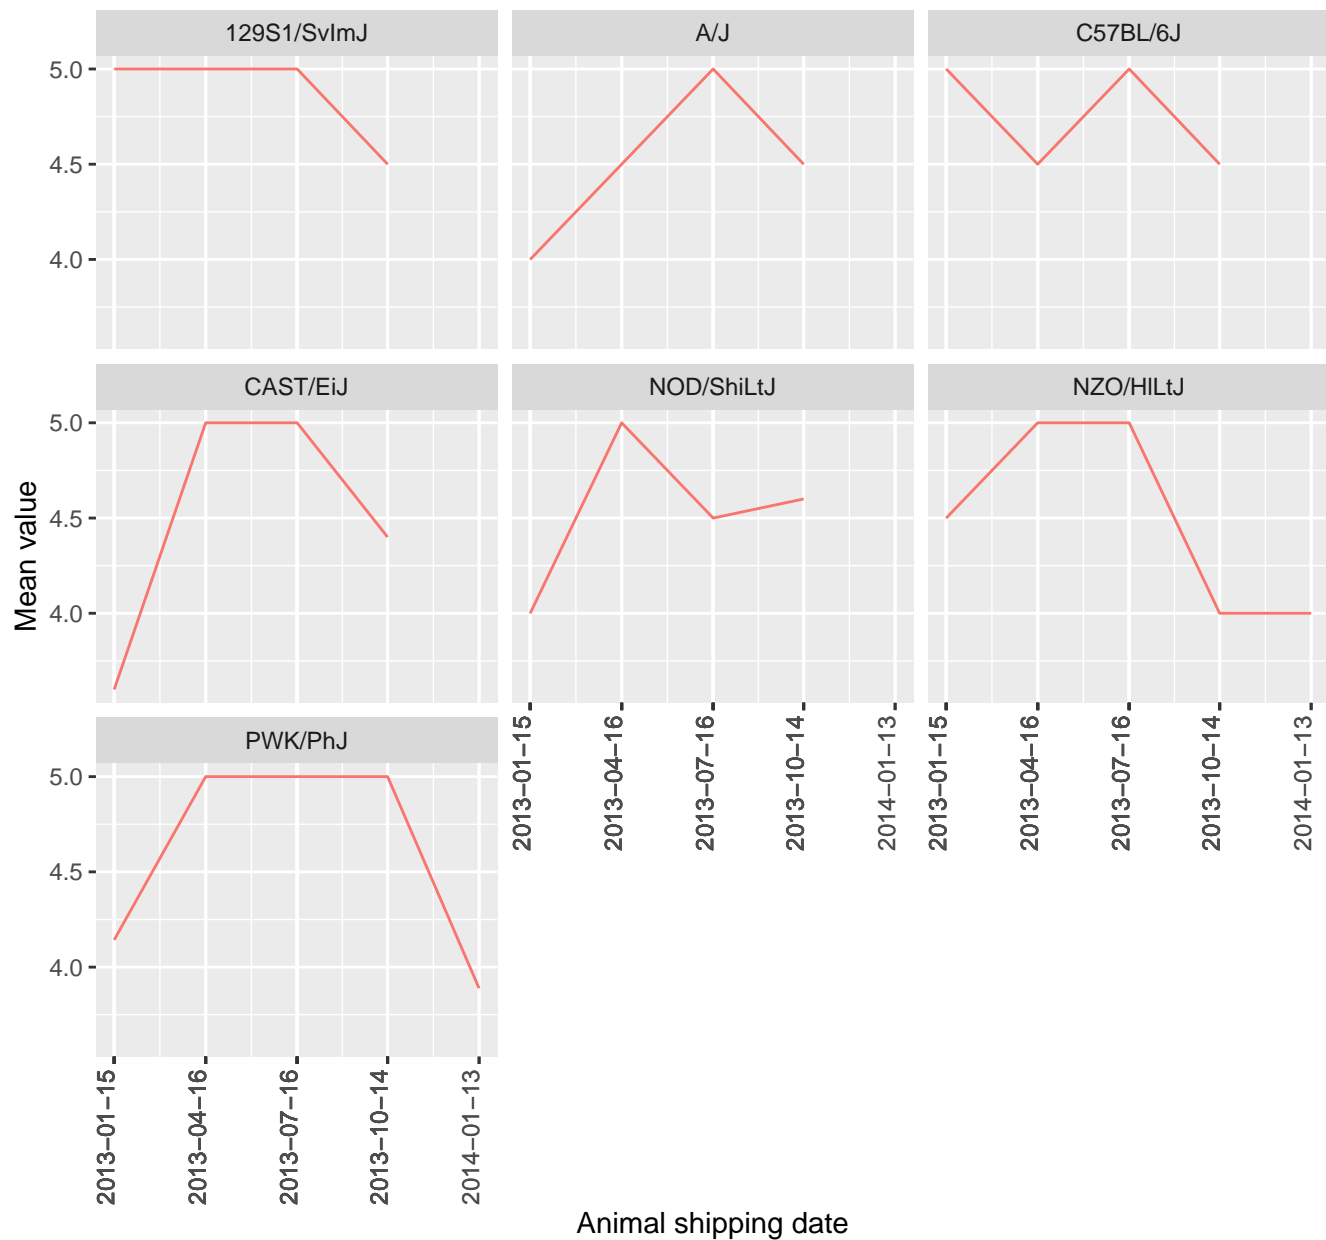



Procedure: GMC05  
Parameter: ASR\_100

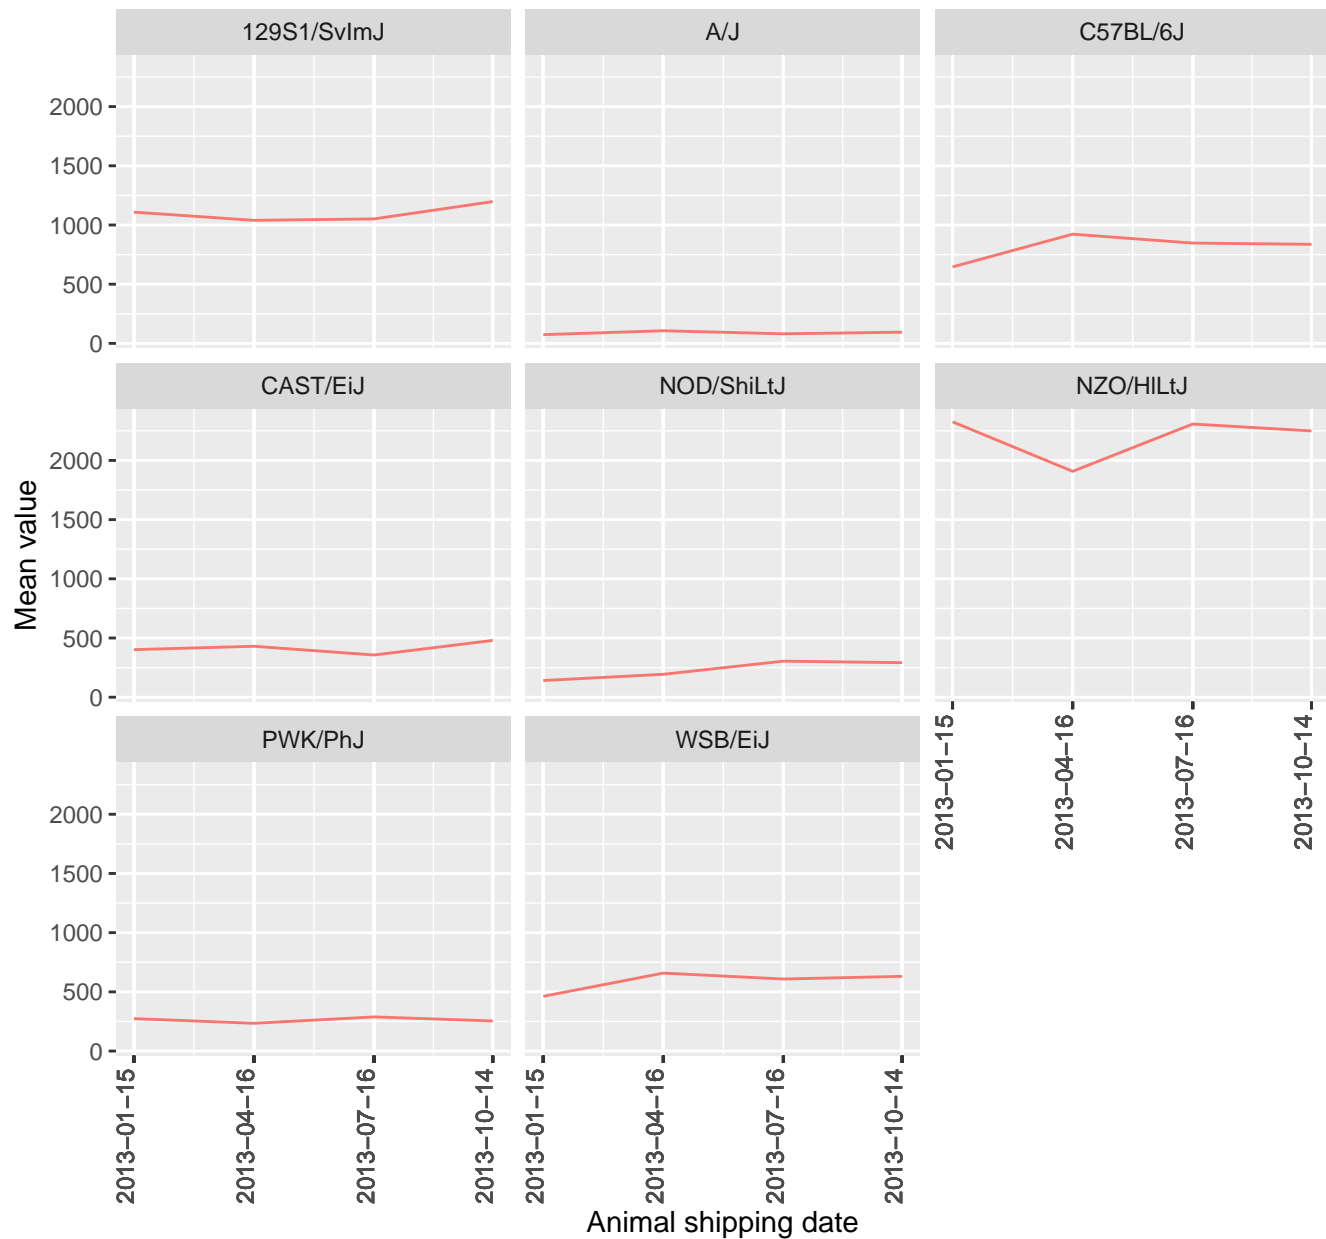

Procedure: GMC05  
Parameter: ASR\_110

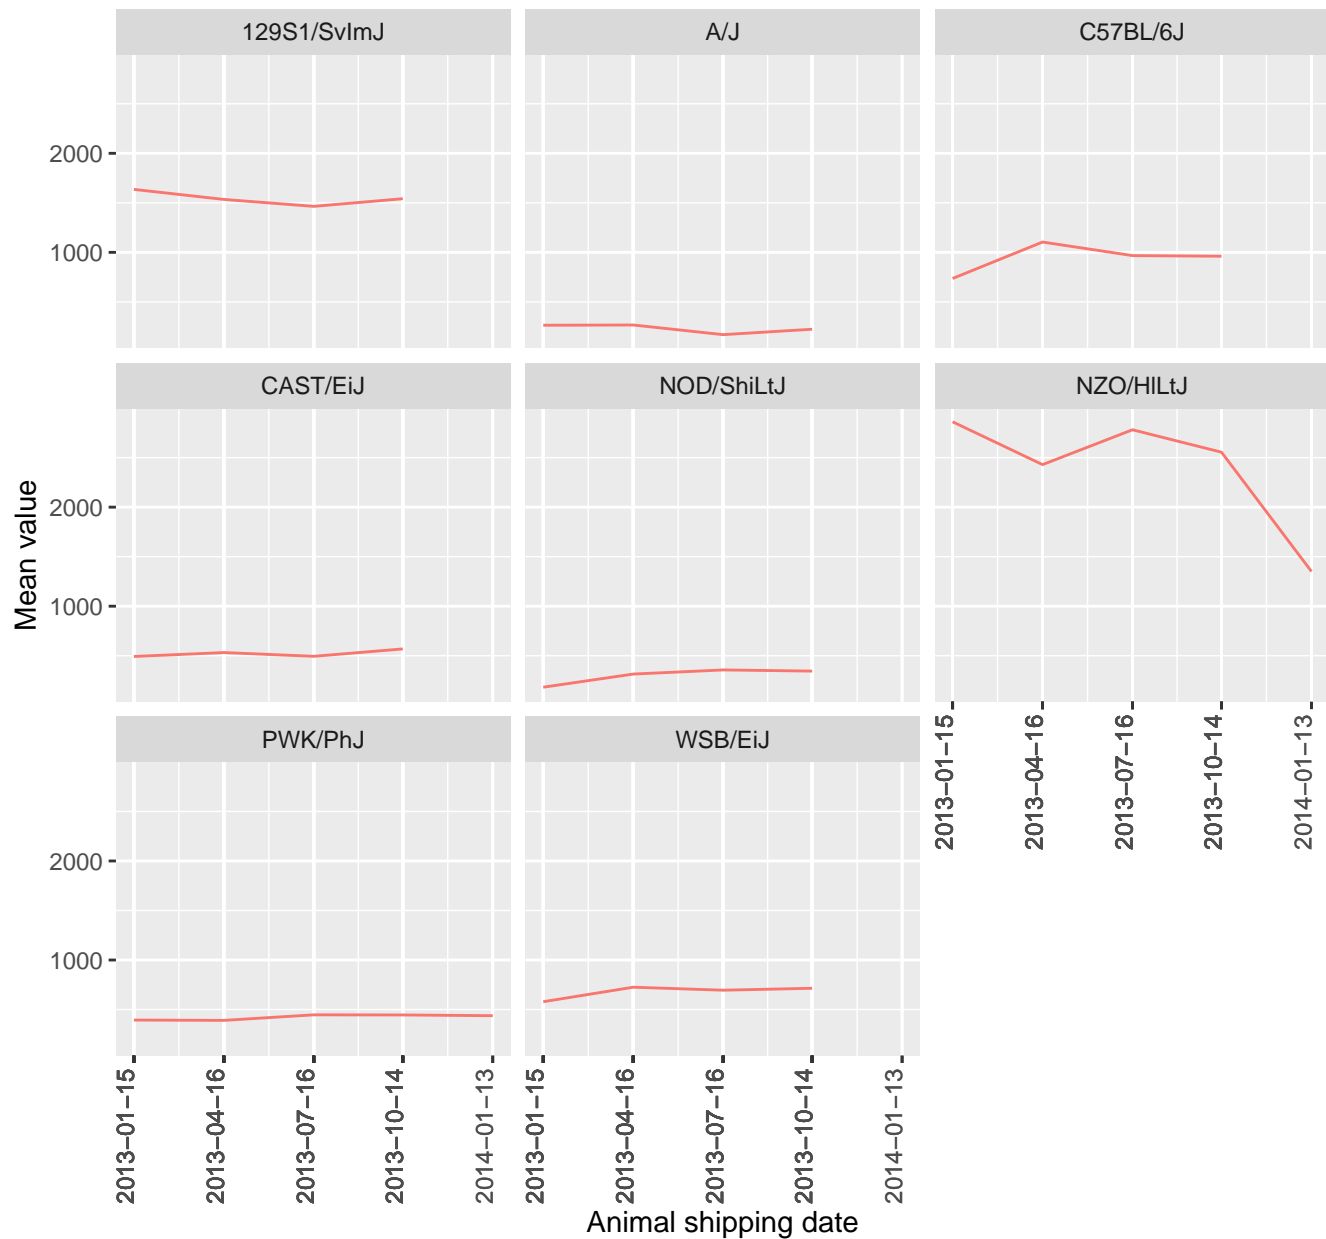

Procedure: GMC05  
Parameter: ASR\_120

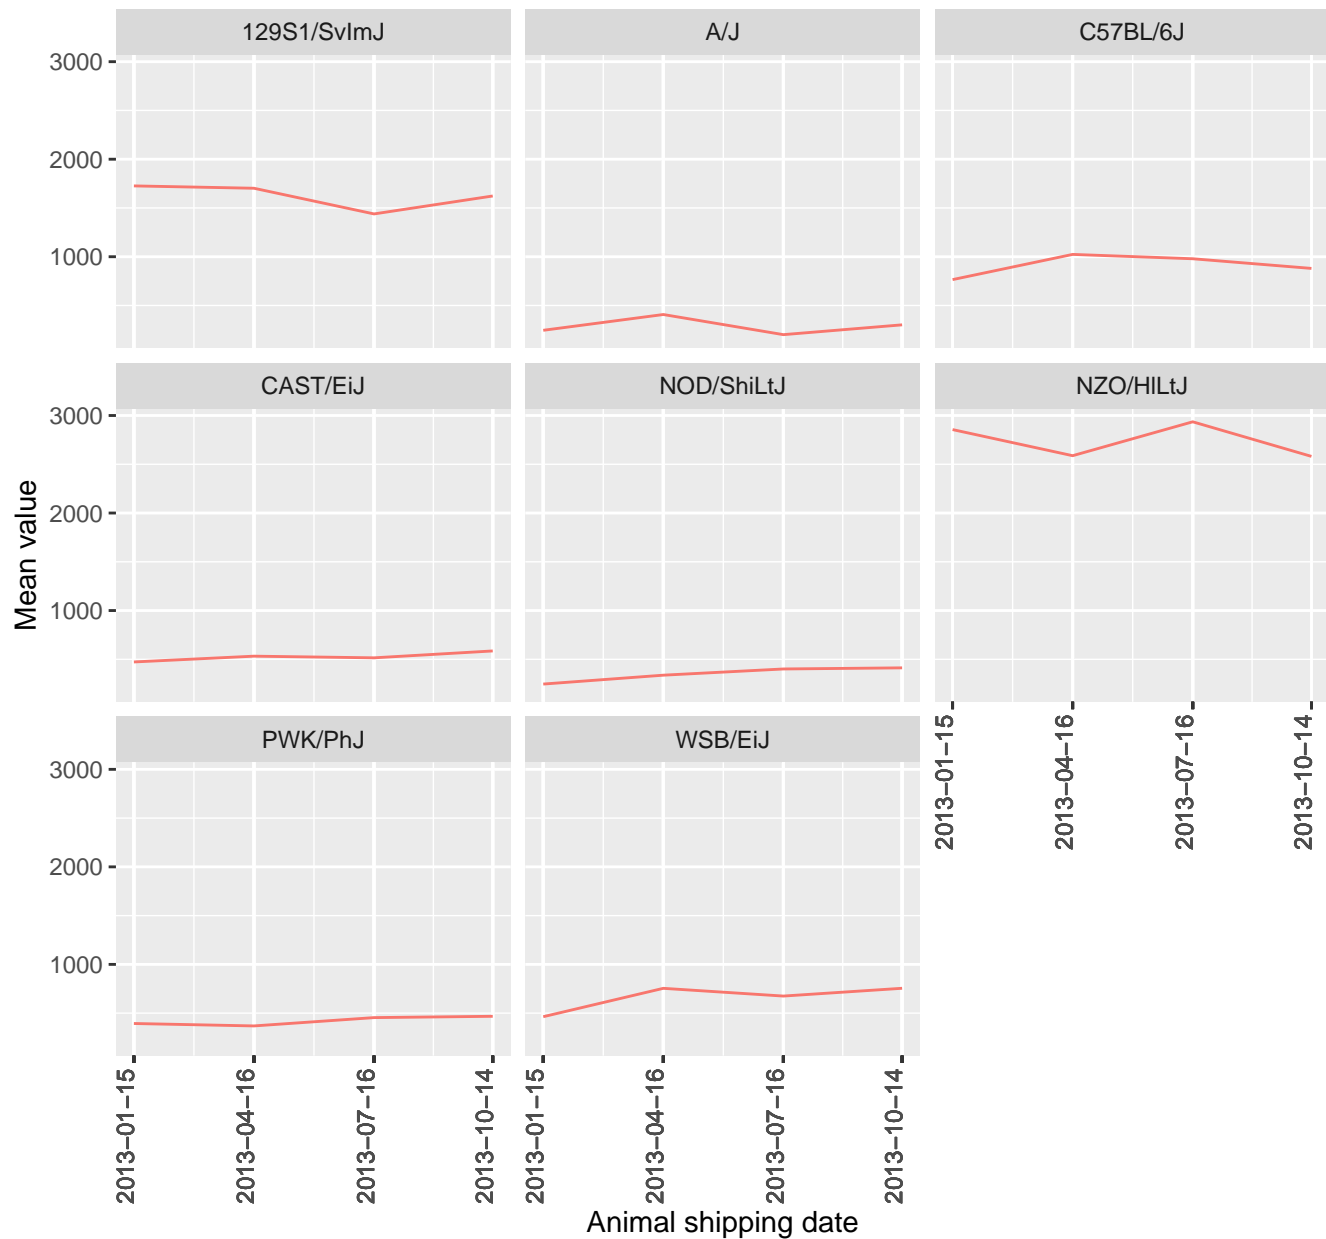

Procedure: GMC05  
Parameter: ASR\_70

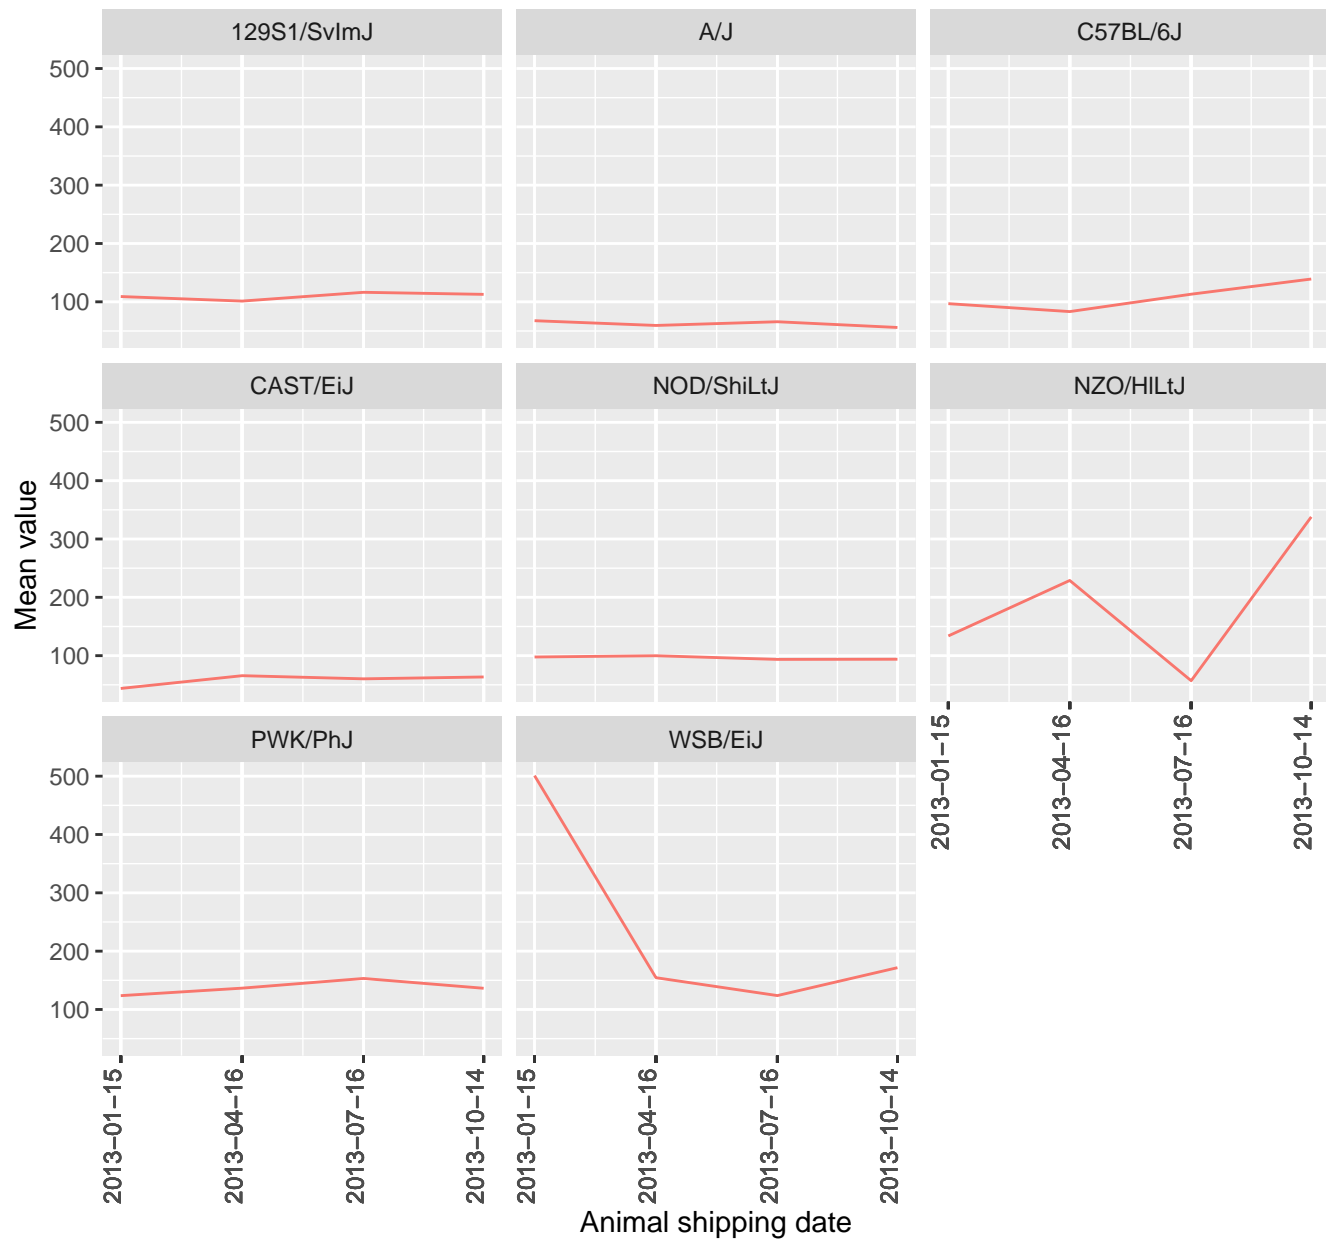

Procedure: GMC05  
Parameter: ASR\_80

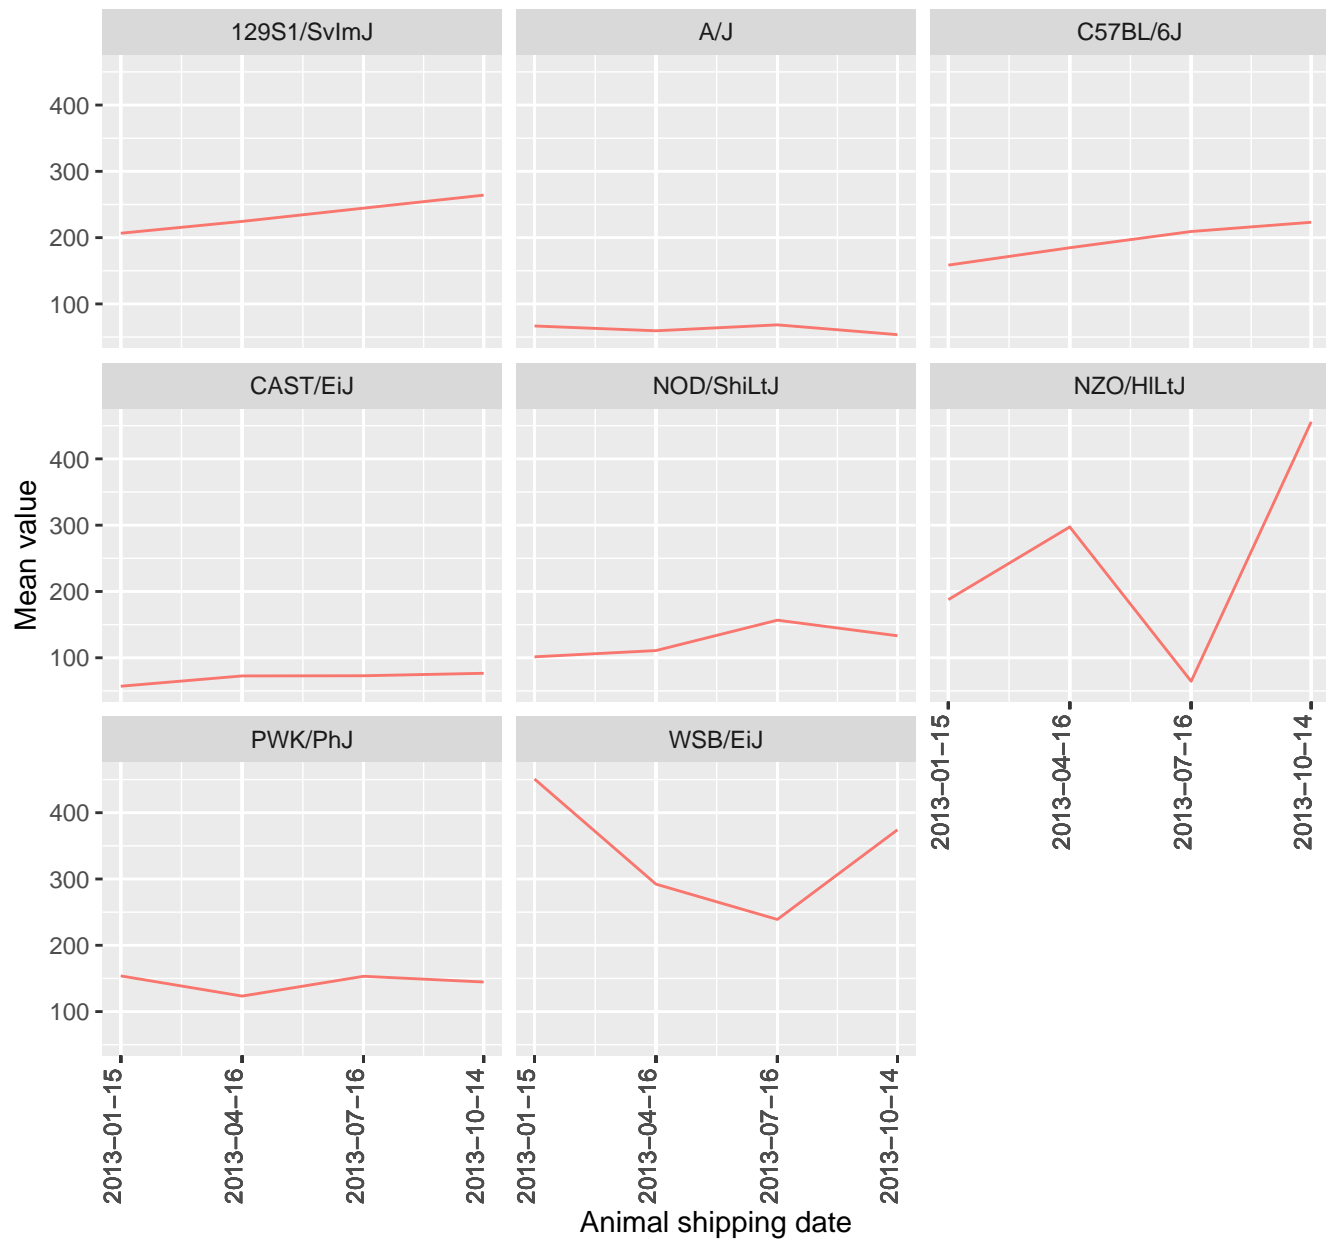

Procedure: GMC05  
Parameter: ASR\_85

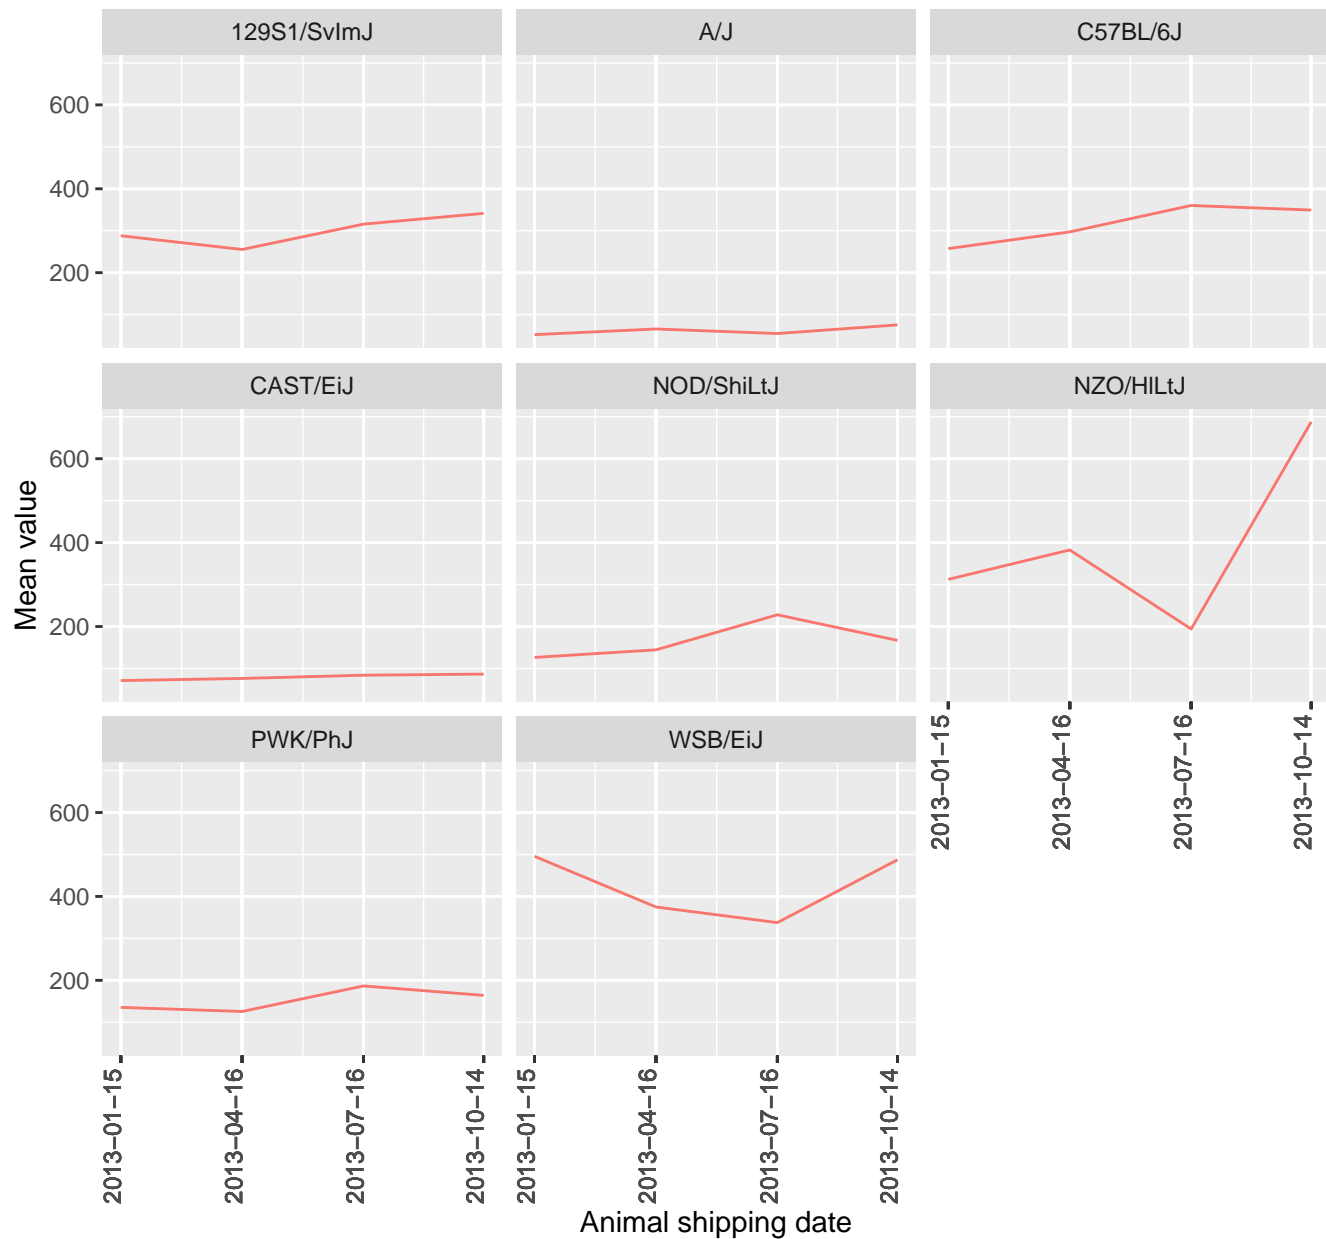

Procedure: GMC05  
Parameter: ASR\_90

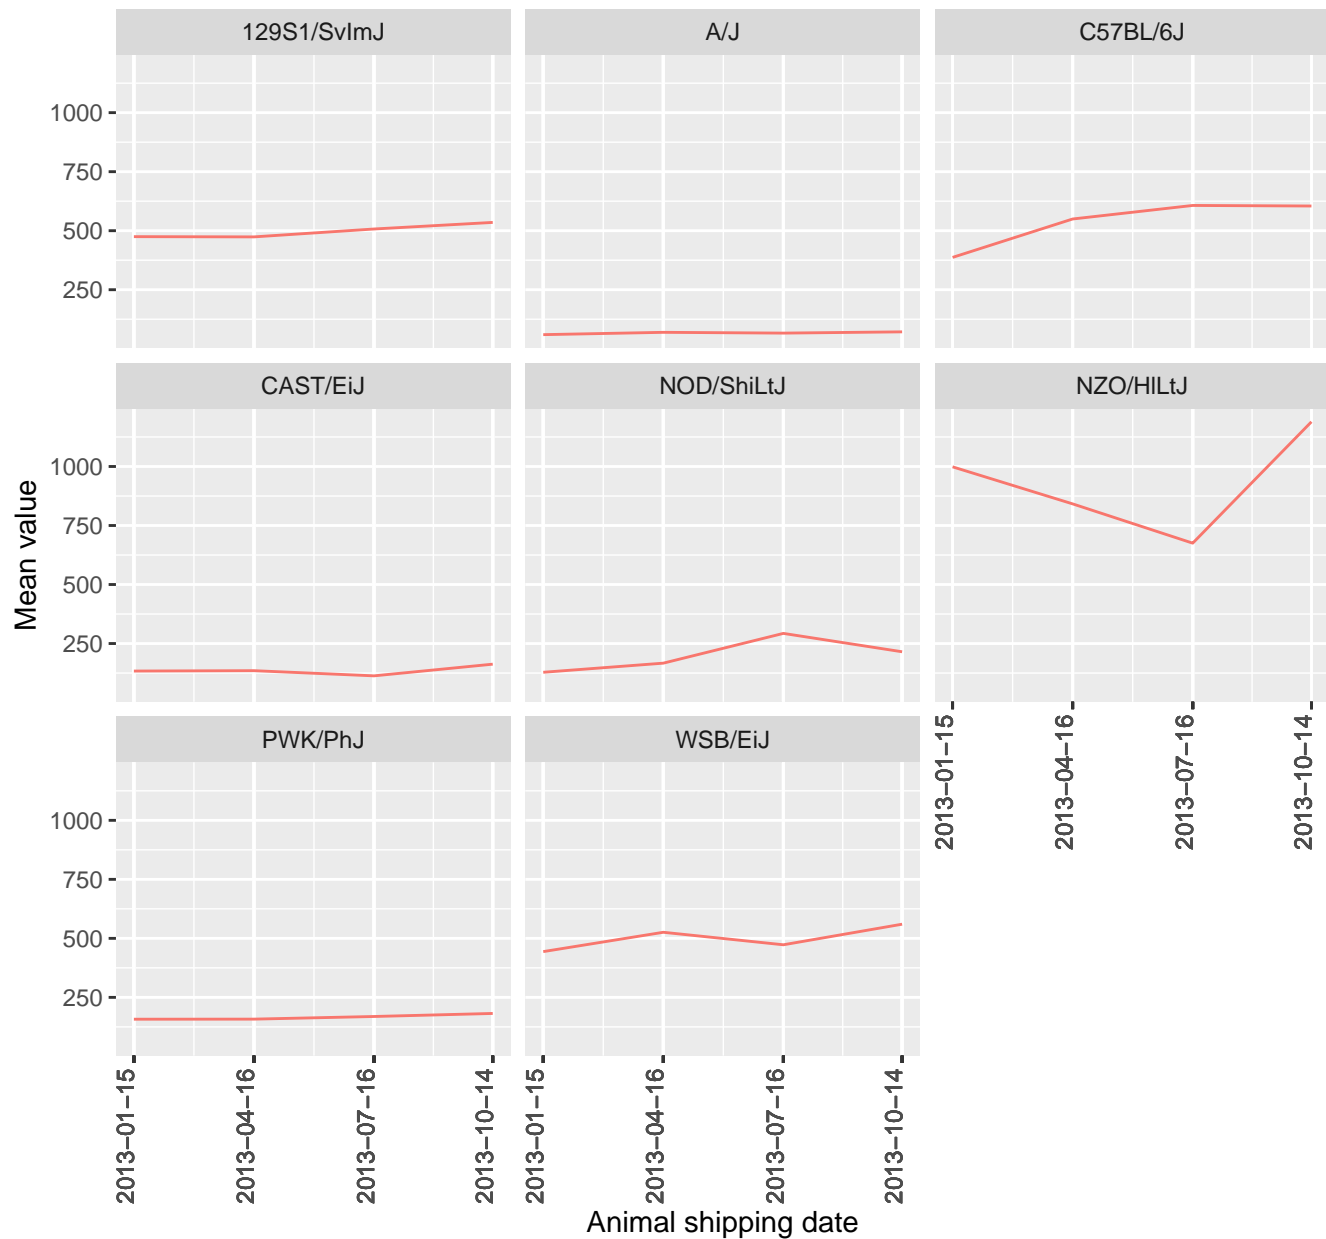

Procedure: GMC05  
Parameter: ASR\_bn

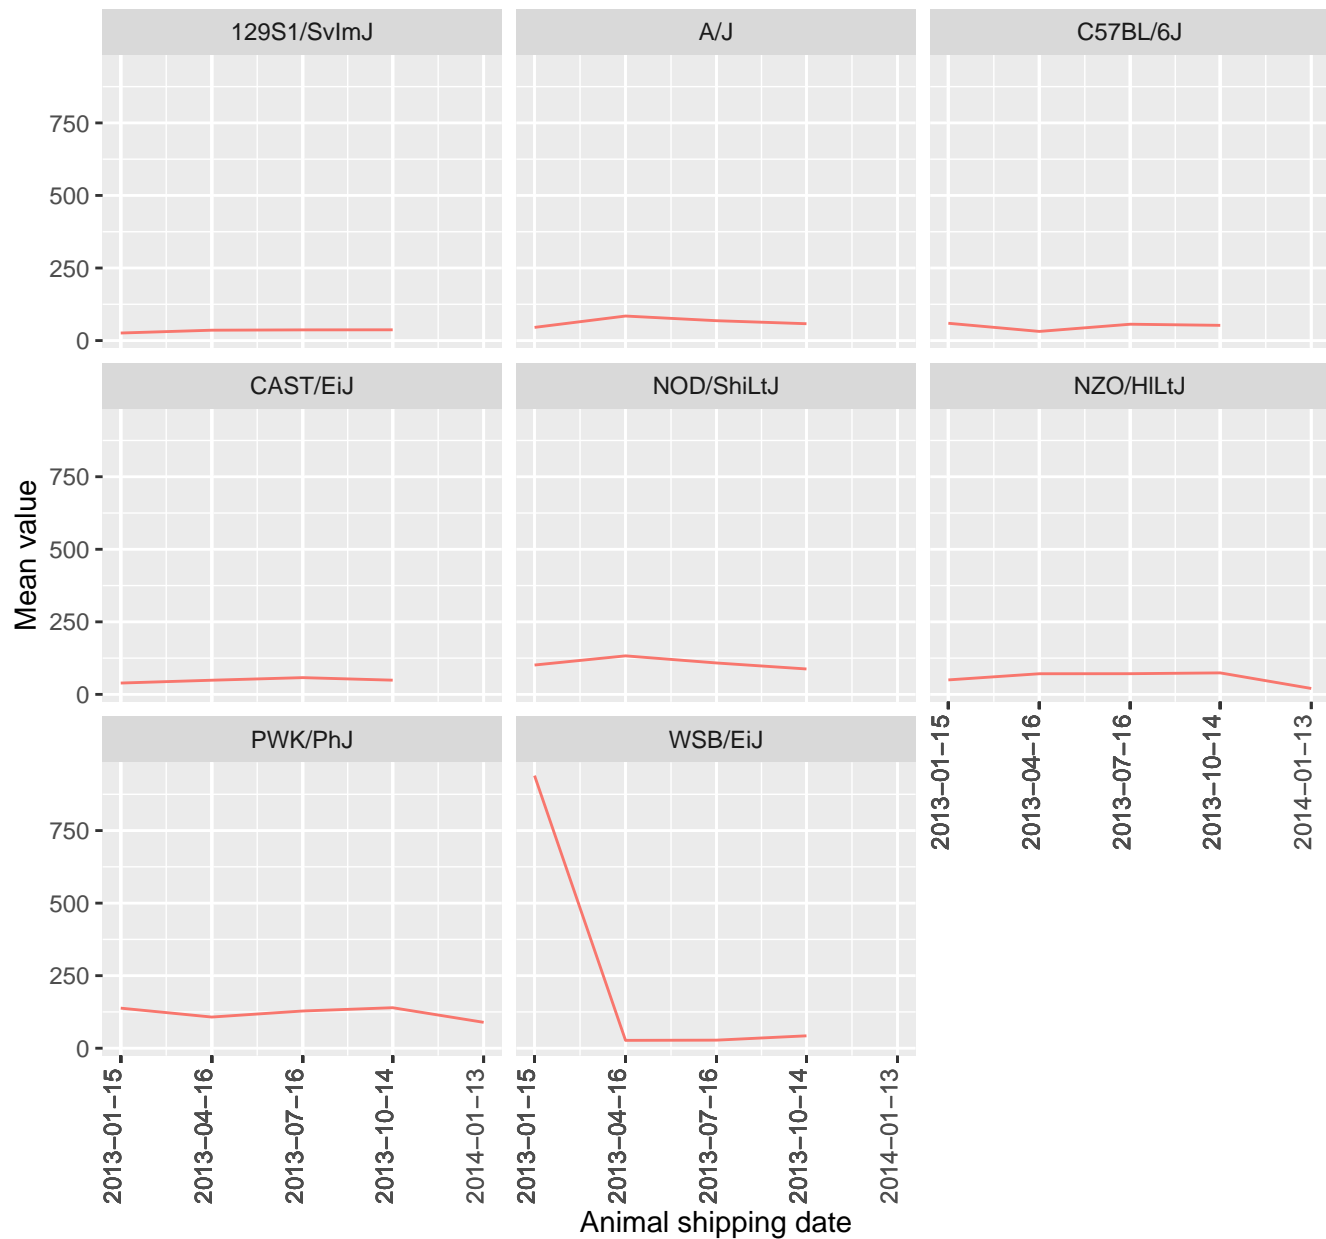



Procedure: GMC05  
Parameter: ASR\_ISI\_100

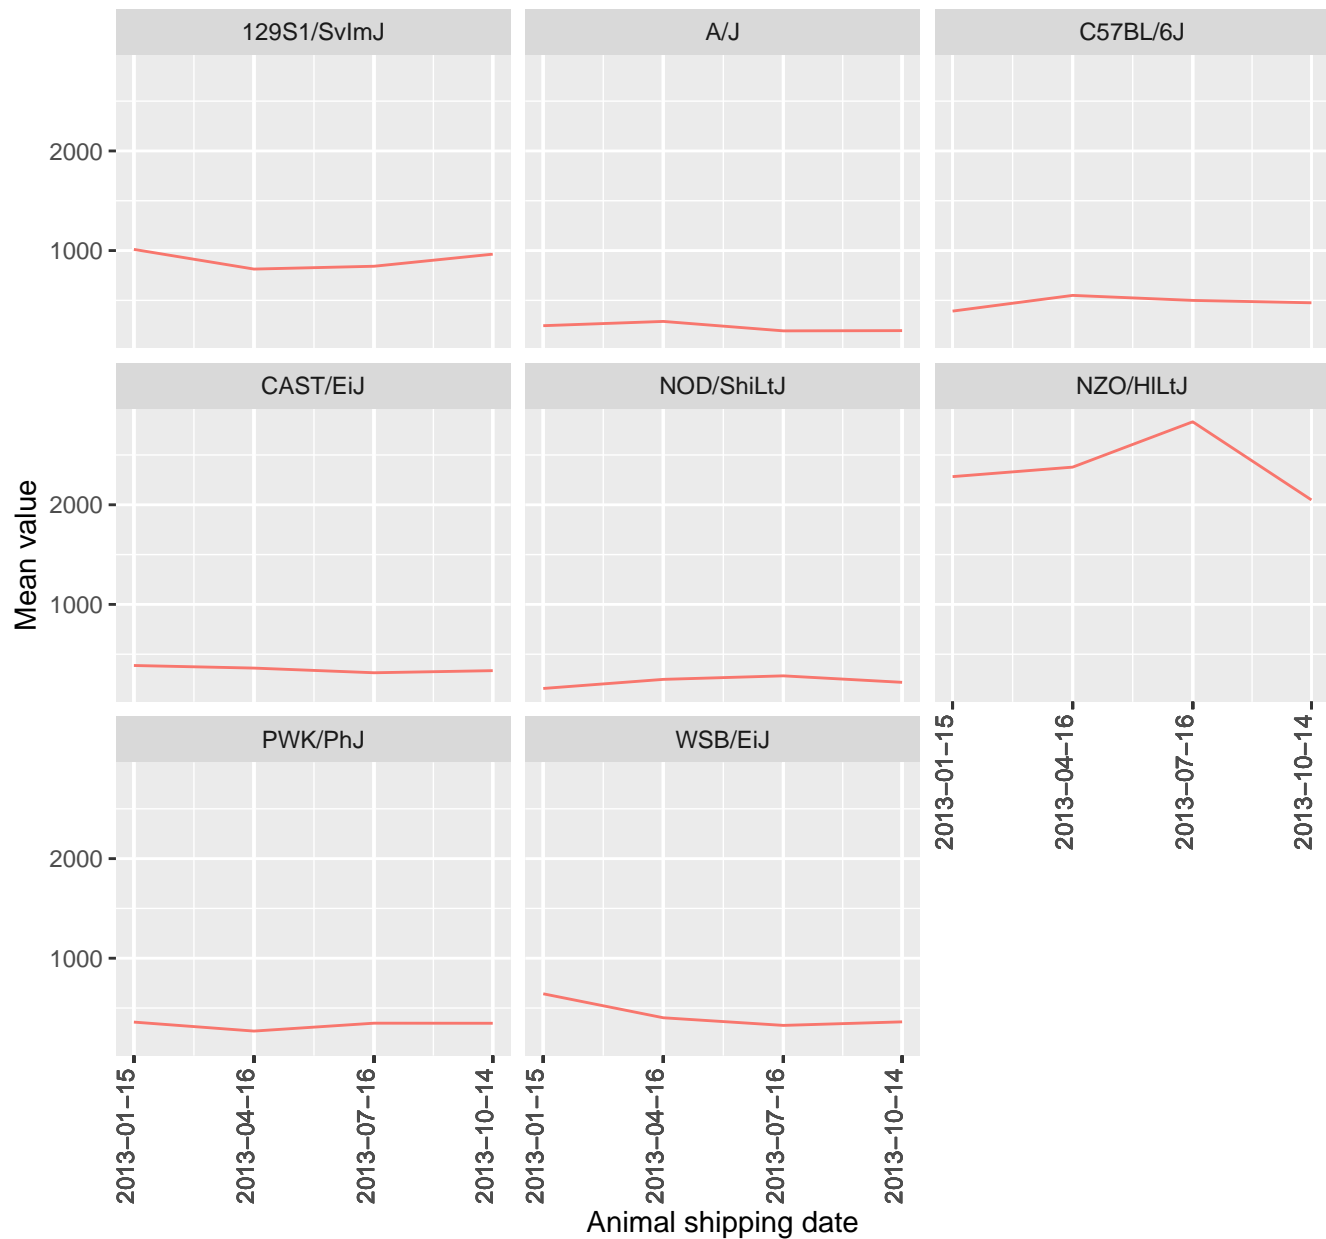

Procedure: GMC05  
Parameter: ASR\_ISI\_25

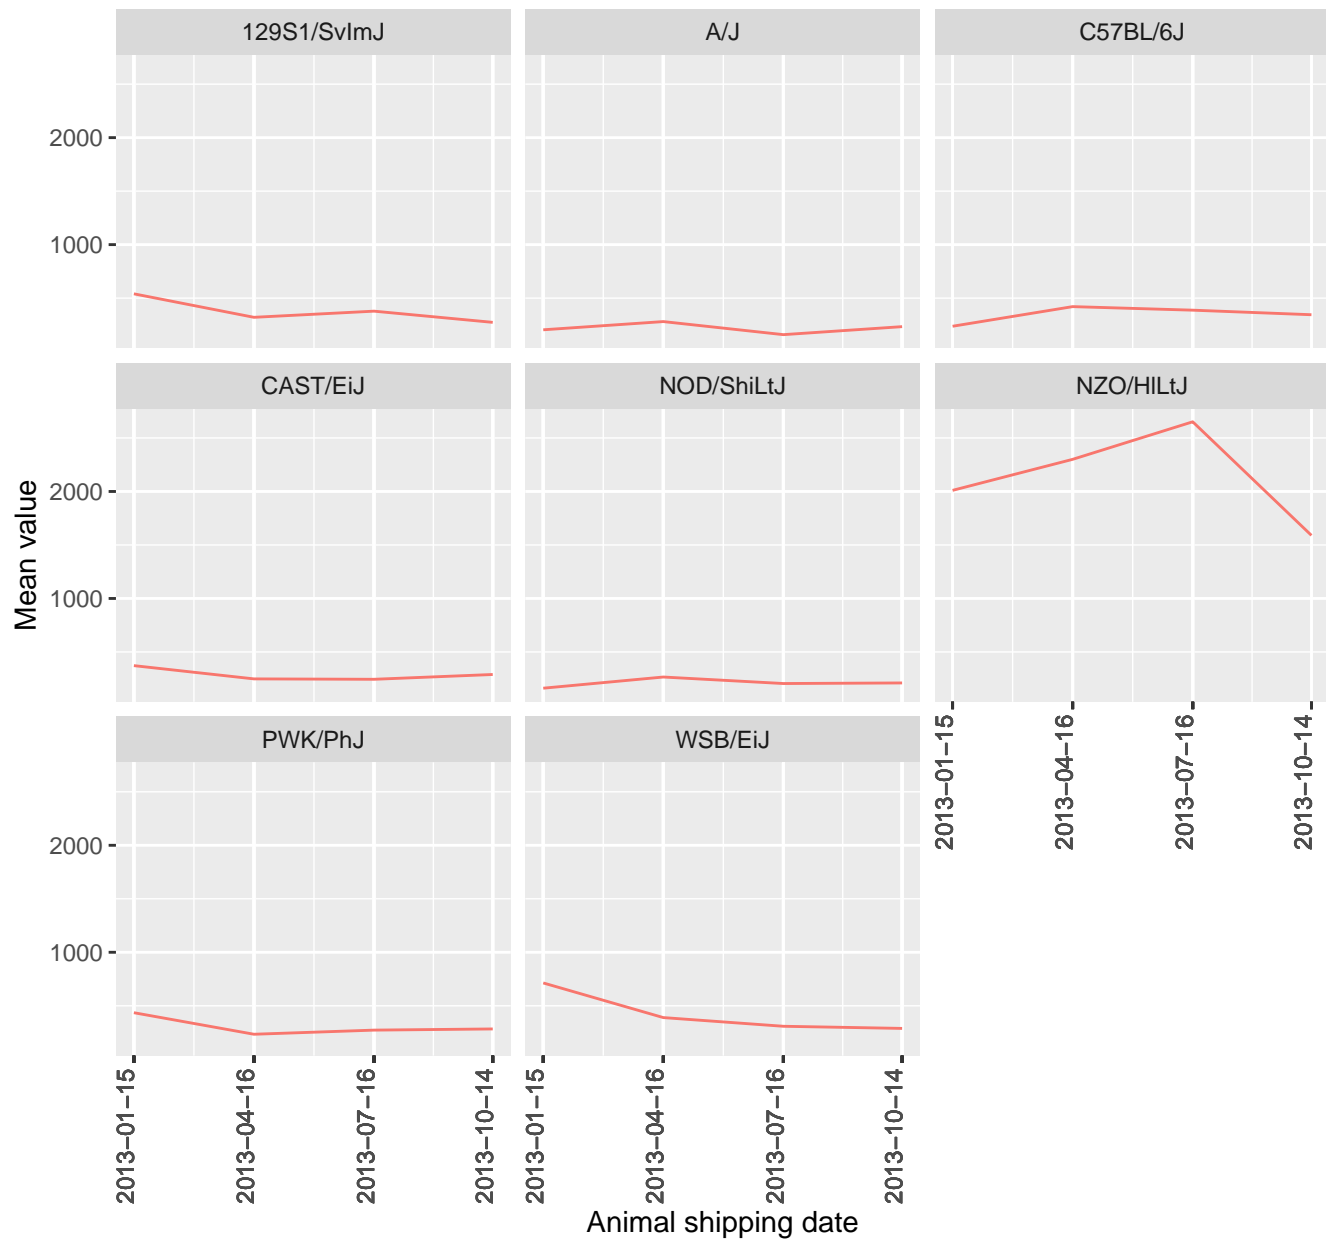

Procedure: GMC05  
Parameter: ASR\_ISI\_5

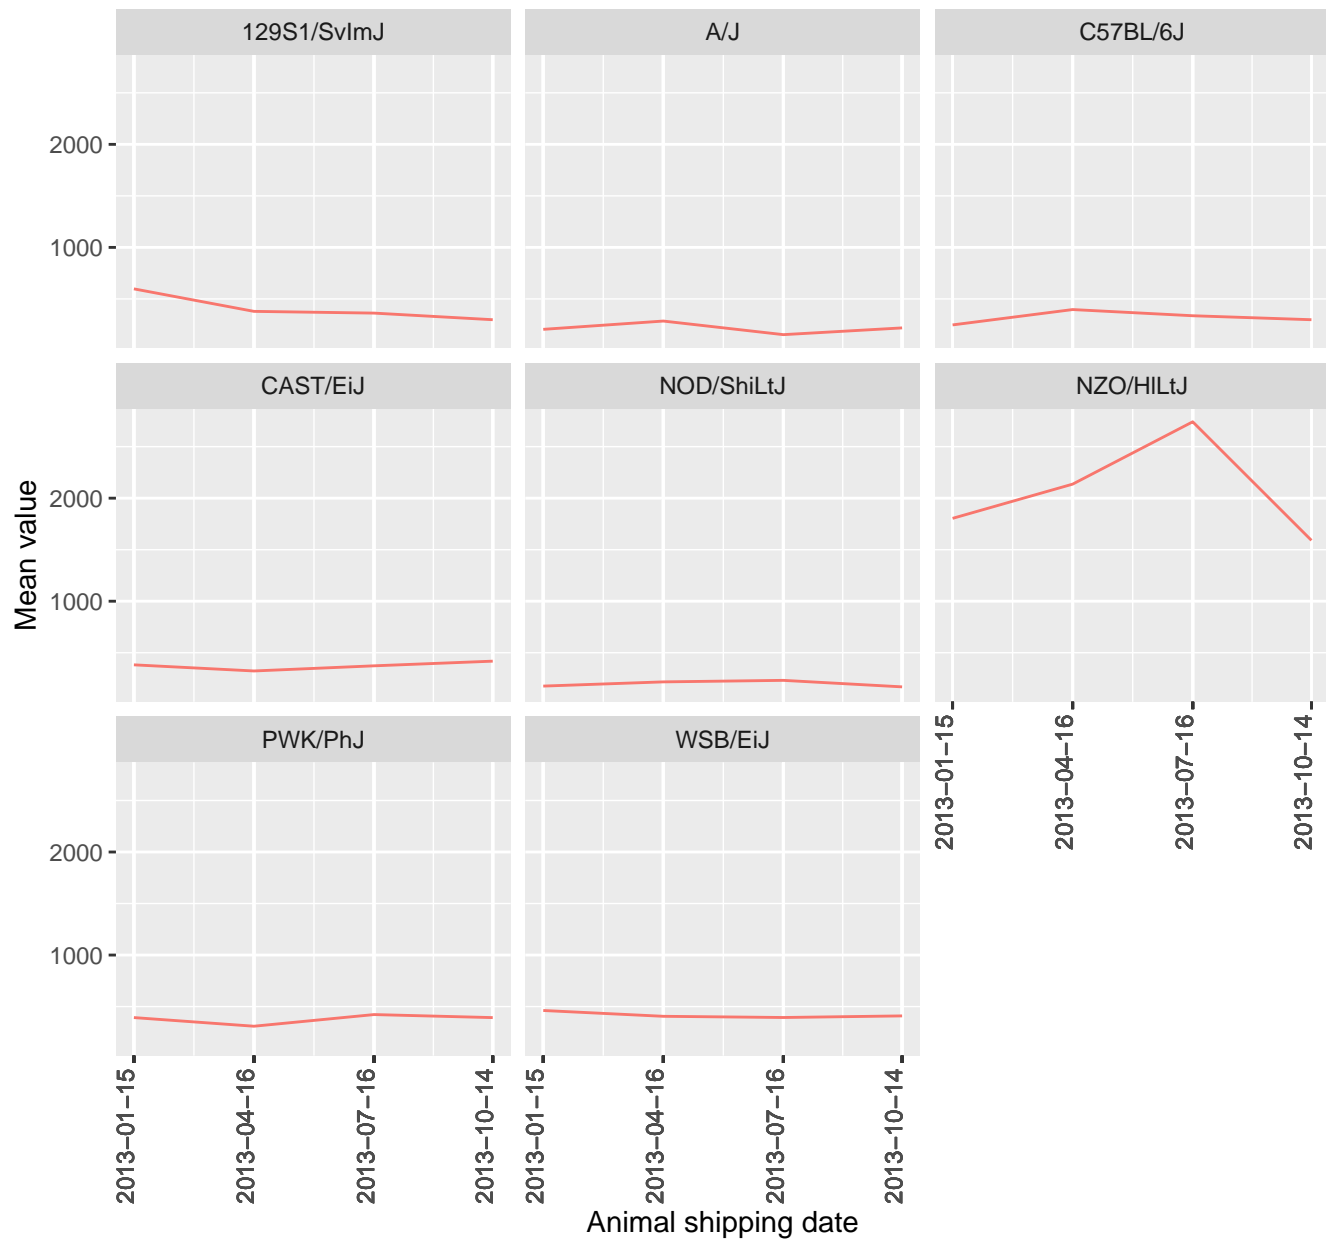

Procedure: GMC05  
Parameter: ASR\_PP\_67

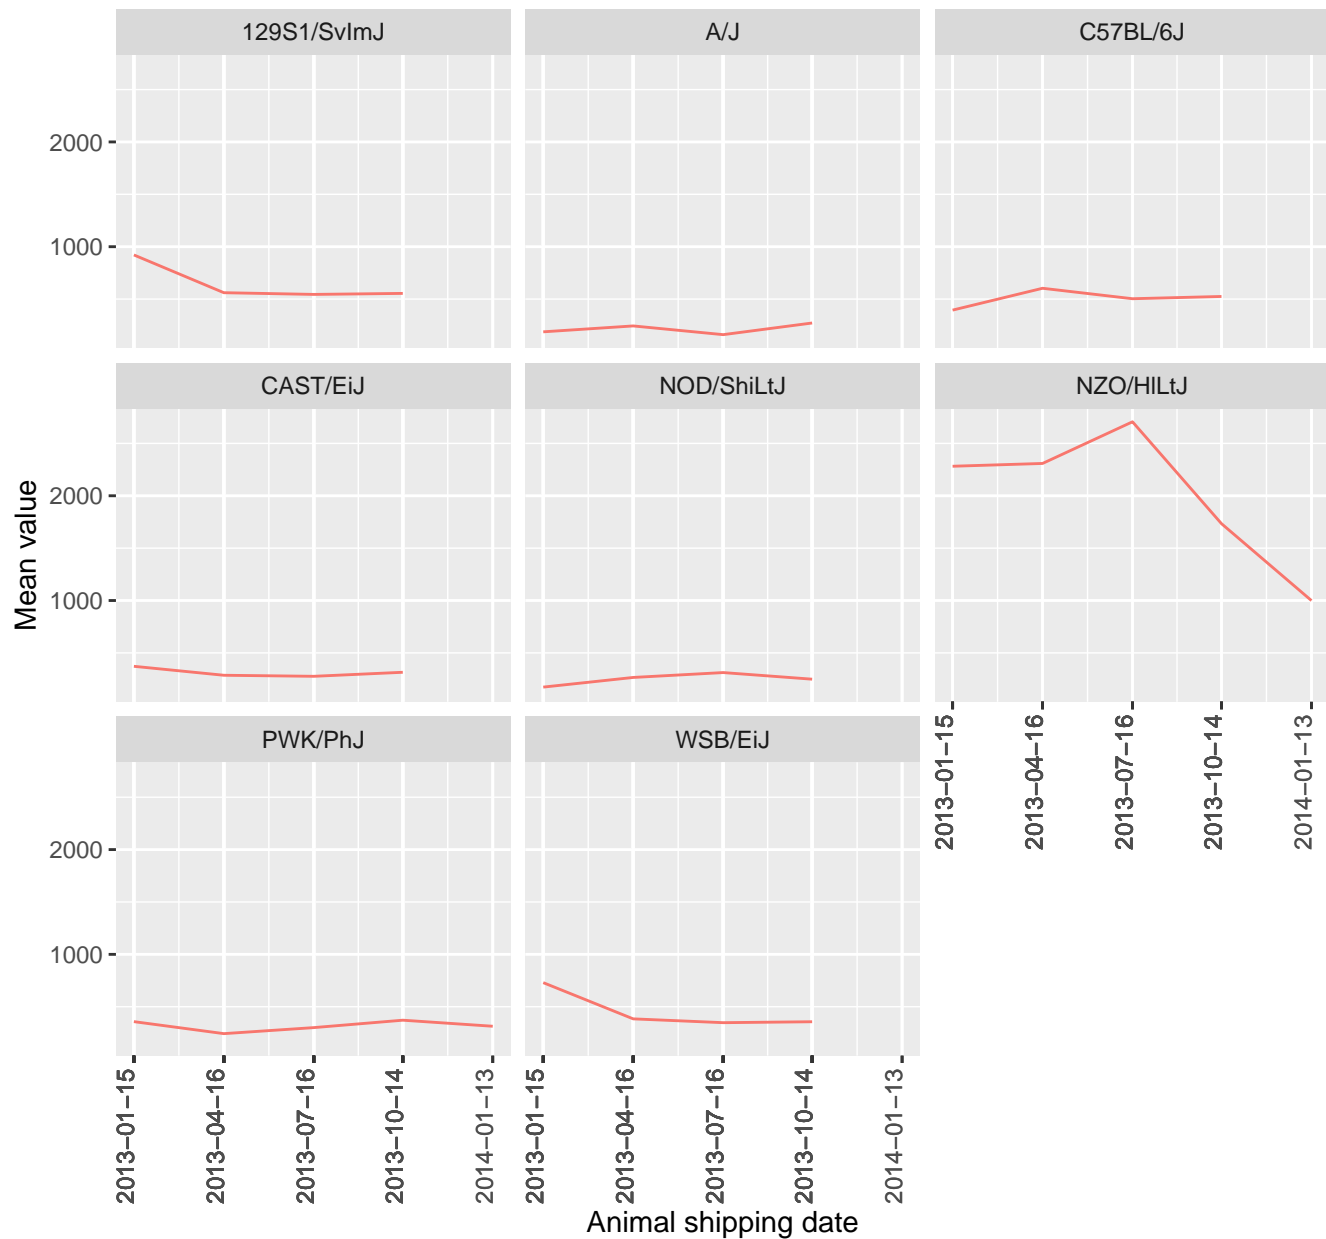

Procedure: GMC05  
Parameter: ASR\_PP\_69

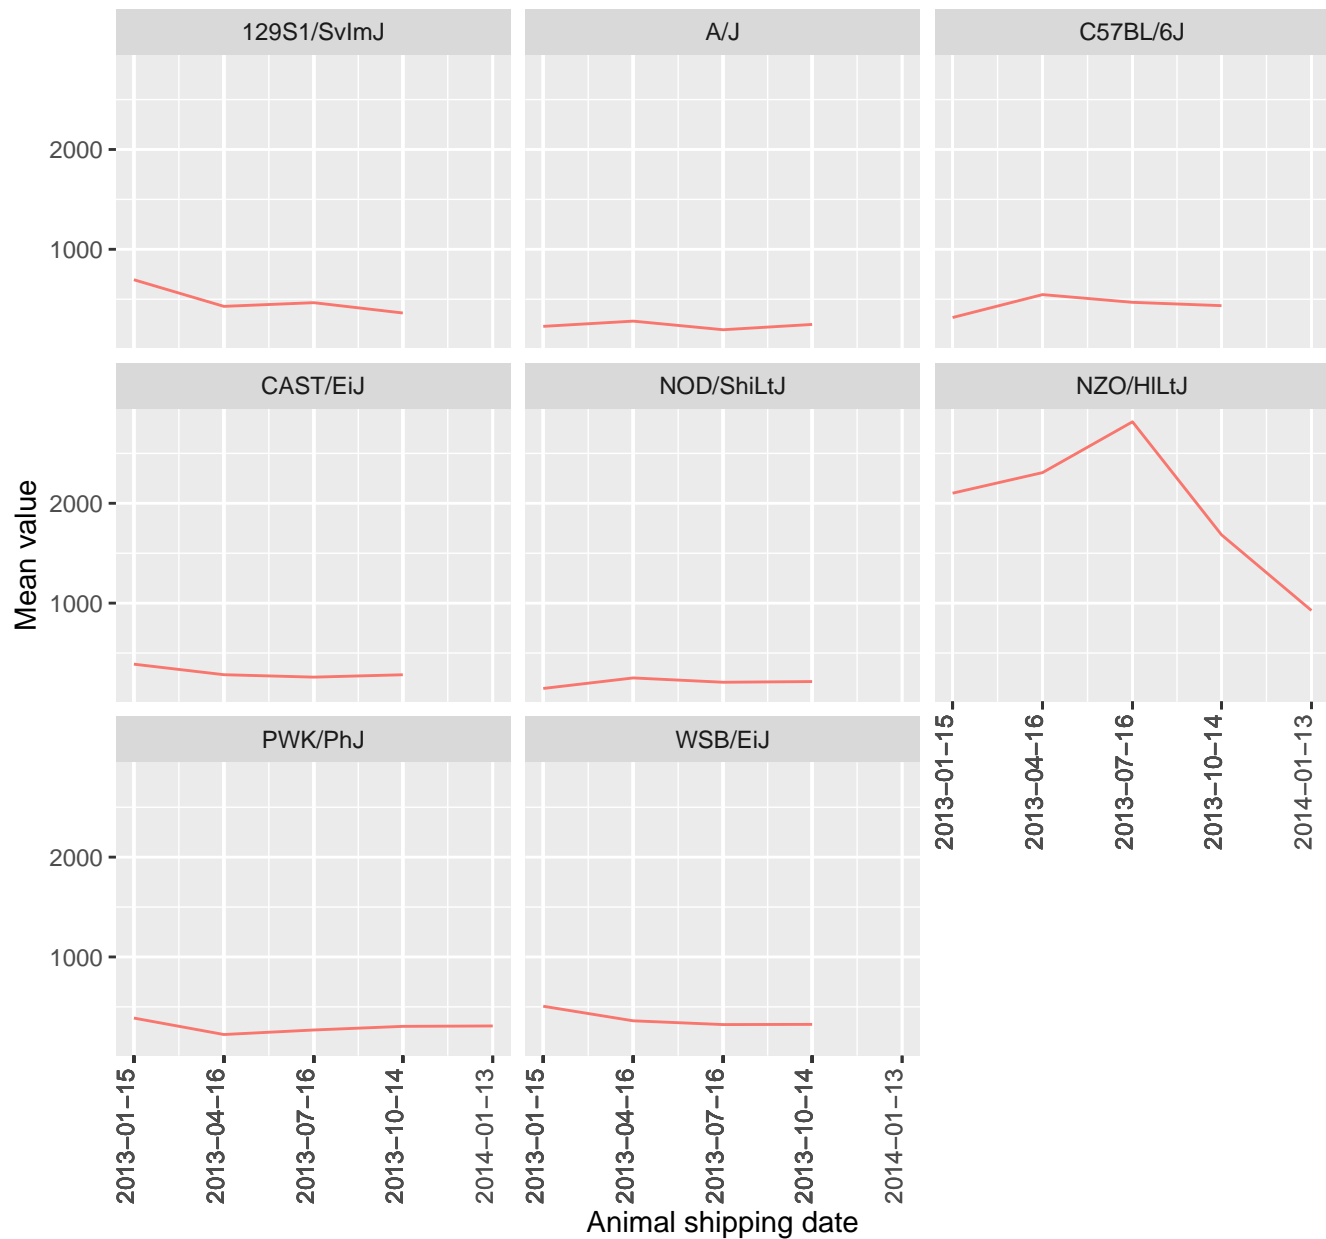

Procedure: GMC05  
Parameter: ASR\_PP\_73

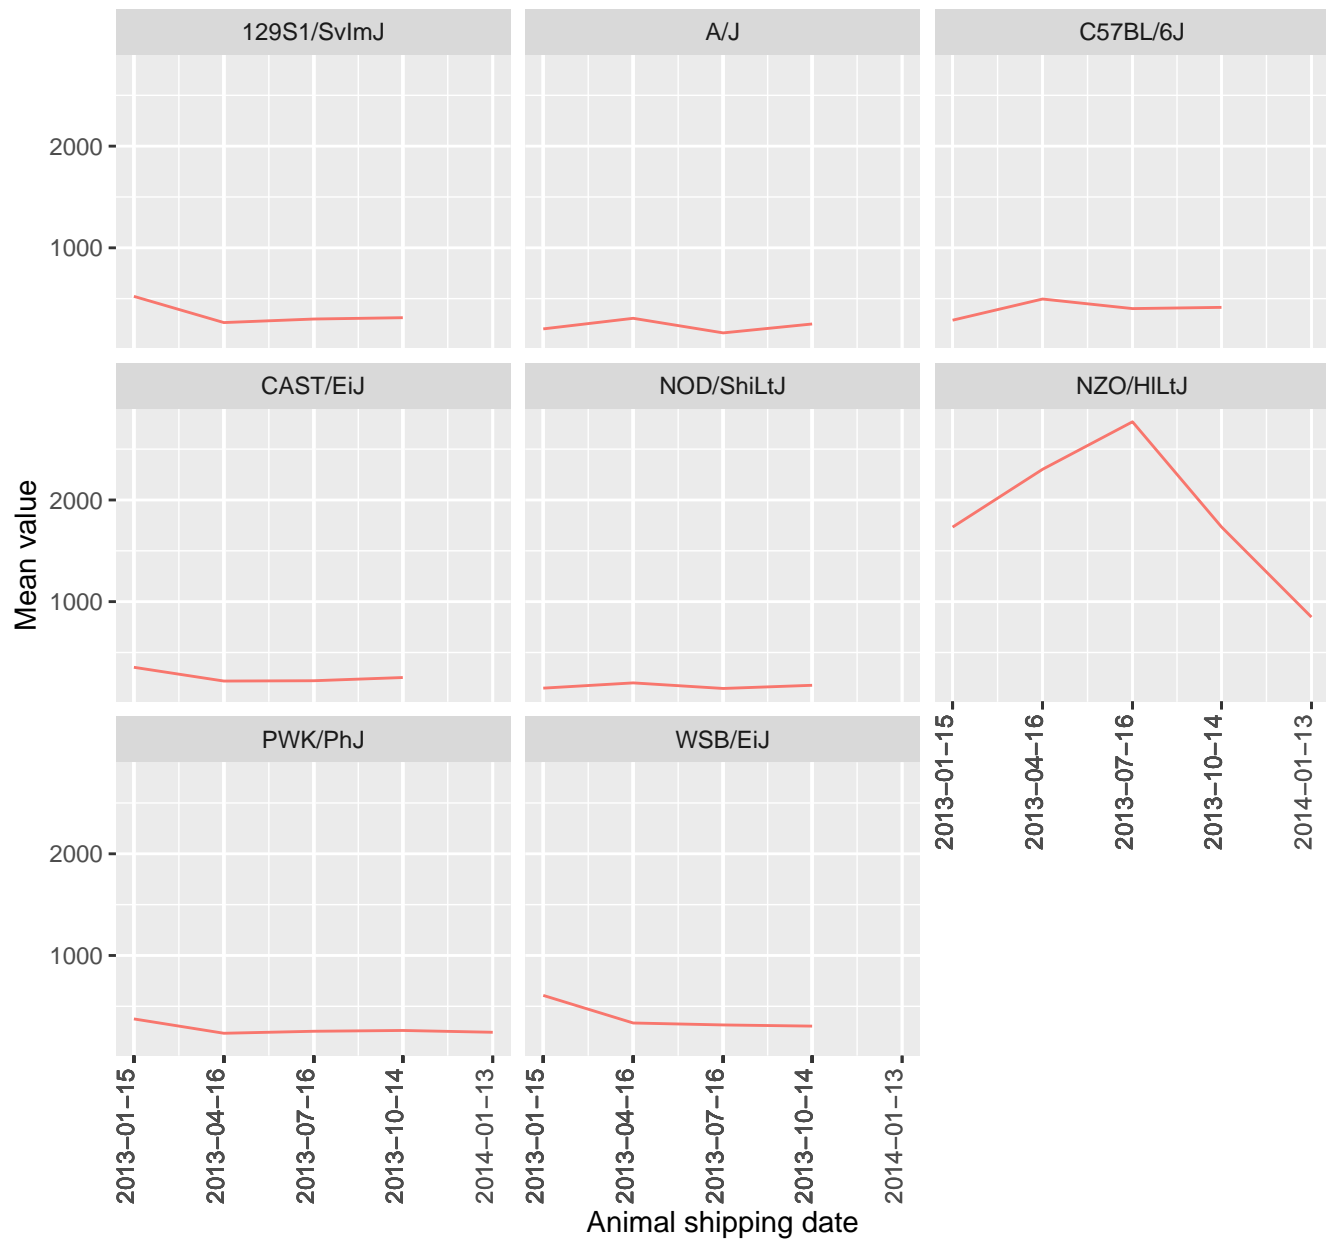

Procedure: GMC05  
Parameter: ASR\_PP\_81

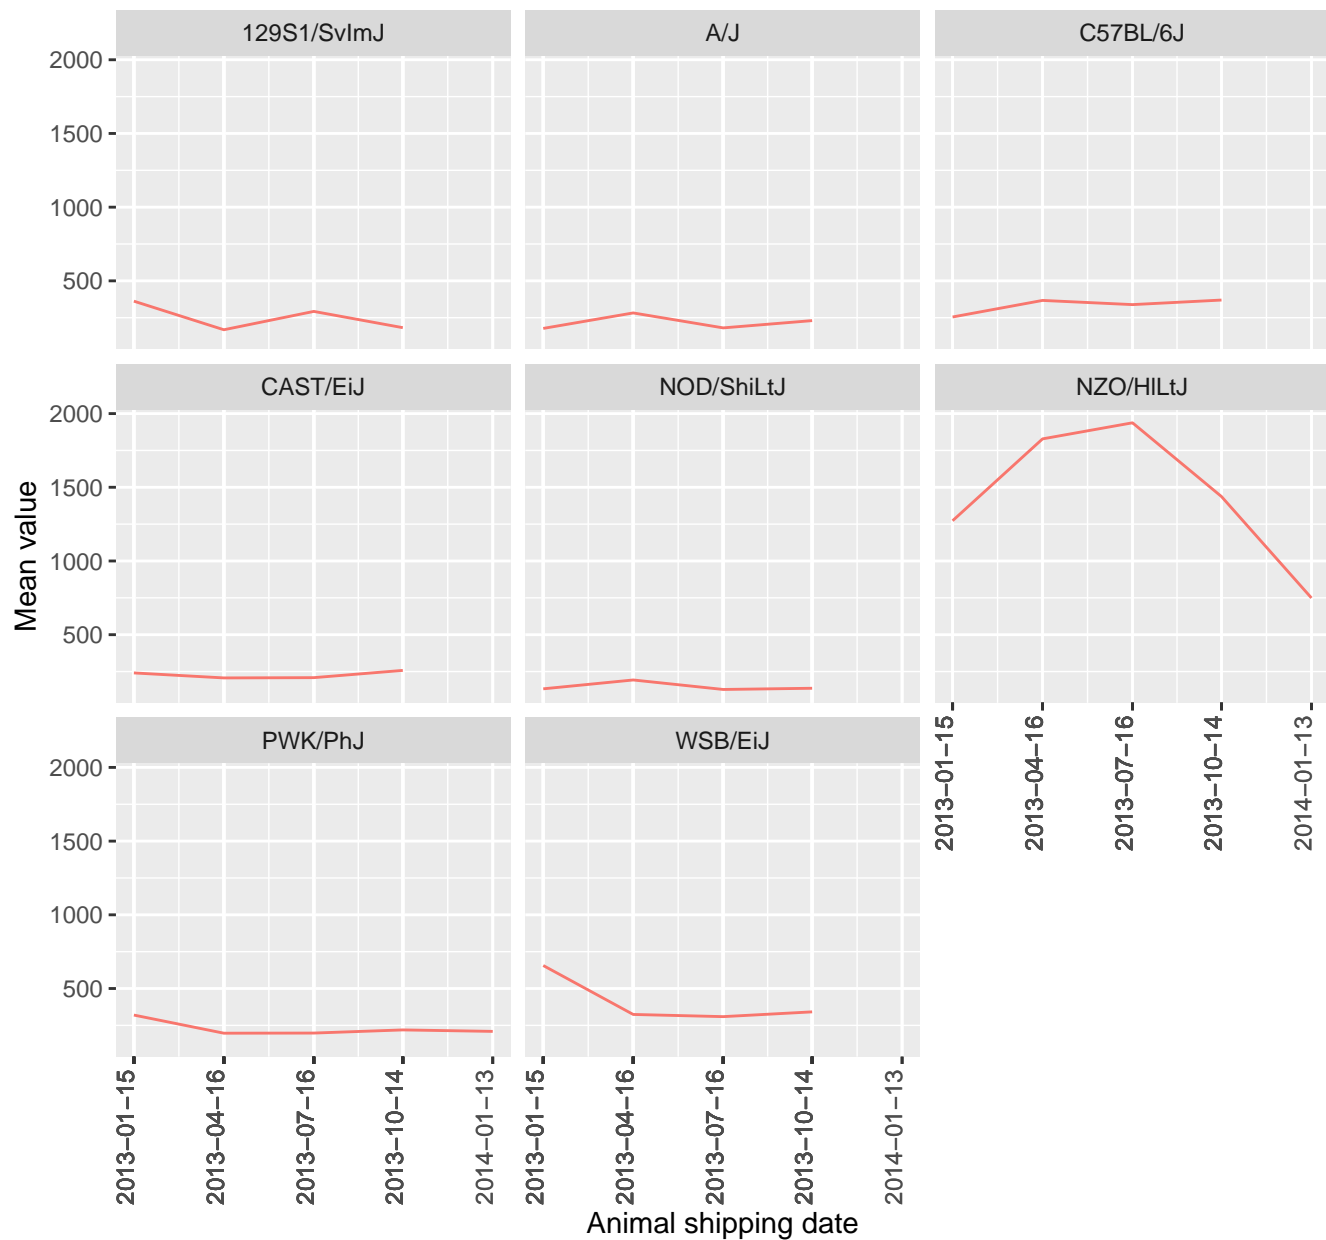

Procedure: GMC05

Parameter: PPI\_67

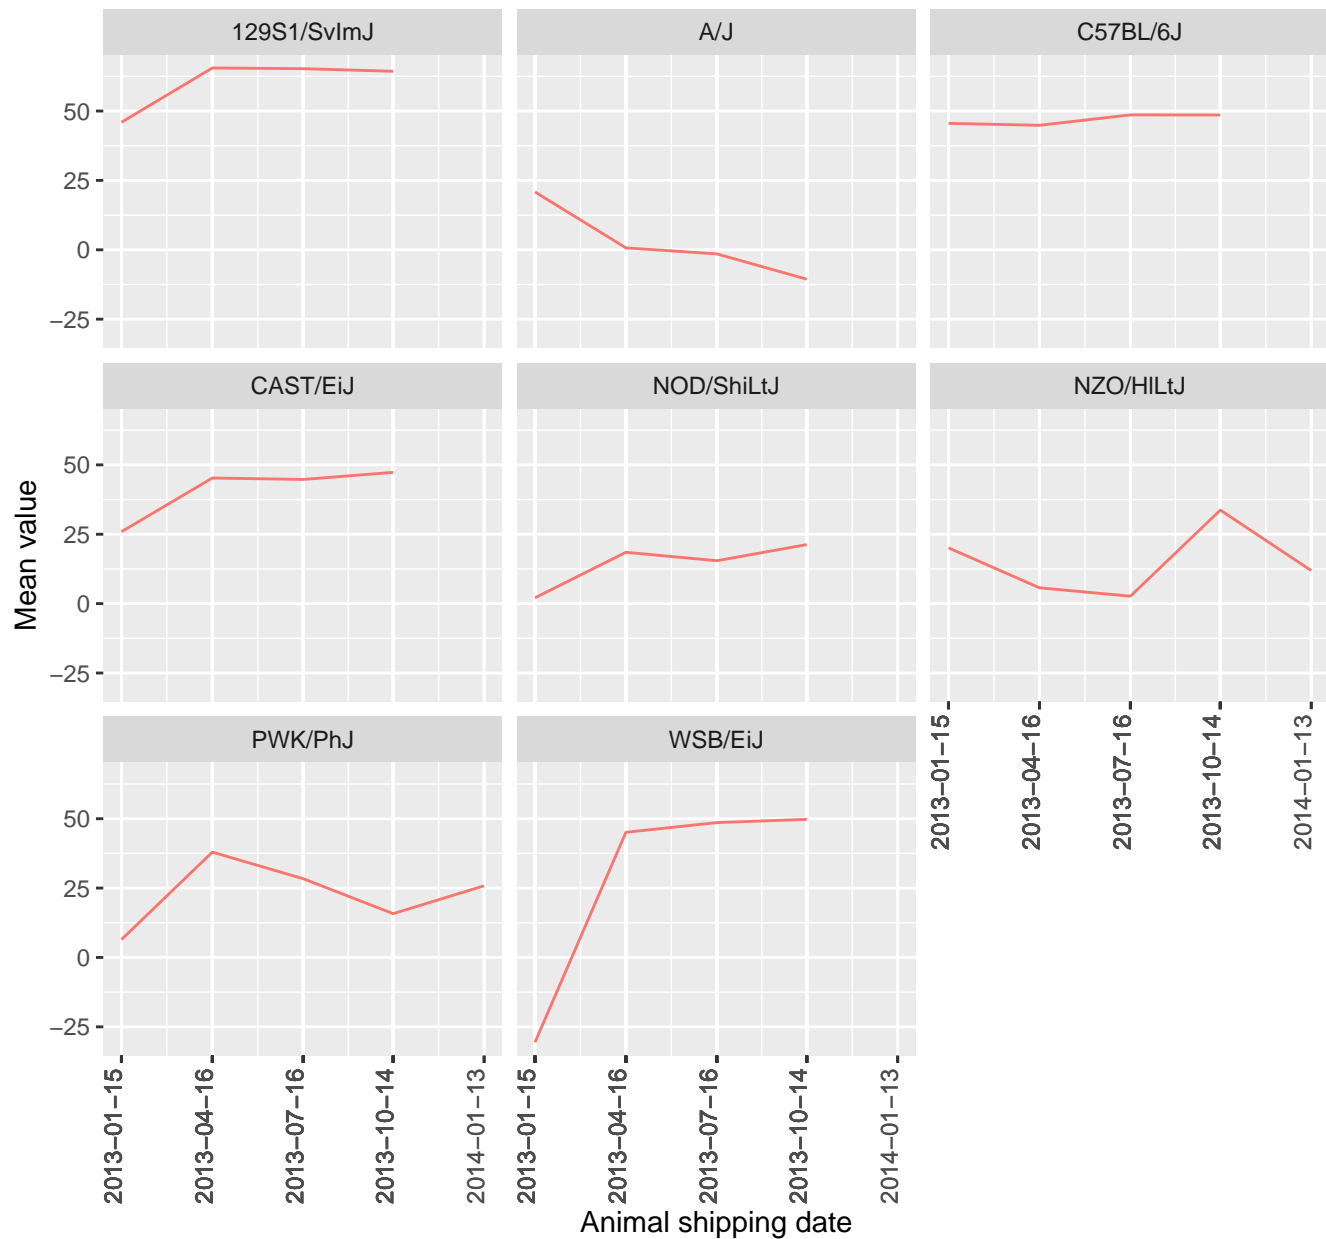



Procedure: GMC05  
Parameter: PPI\_69

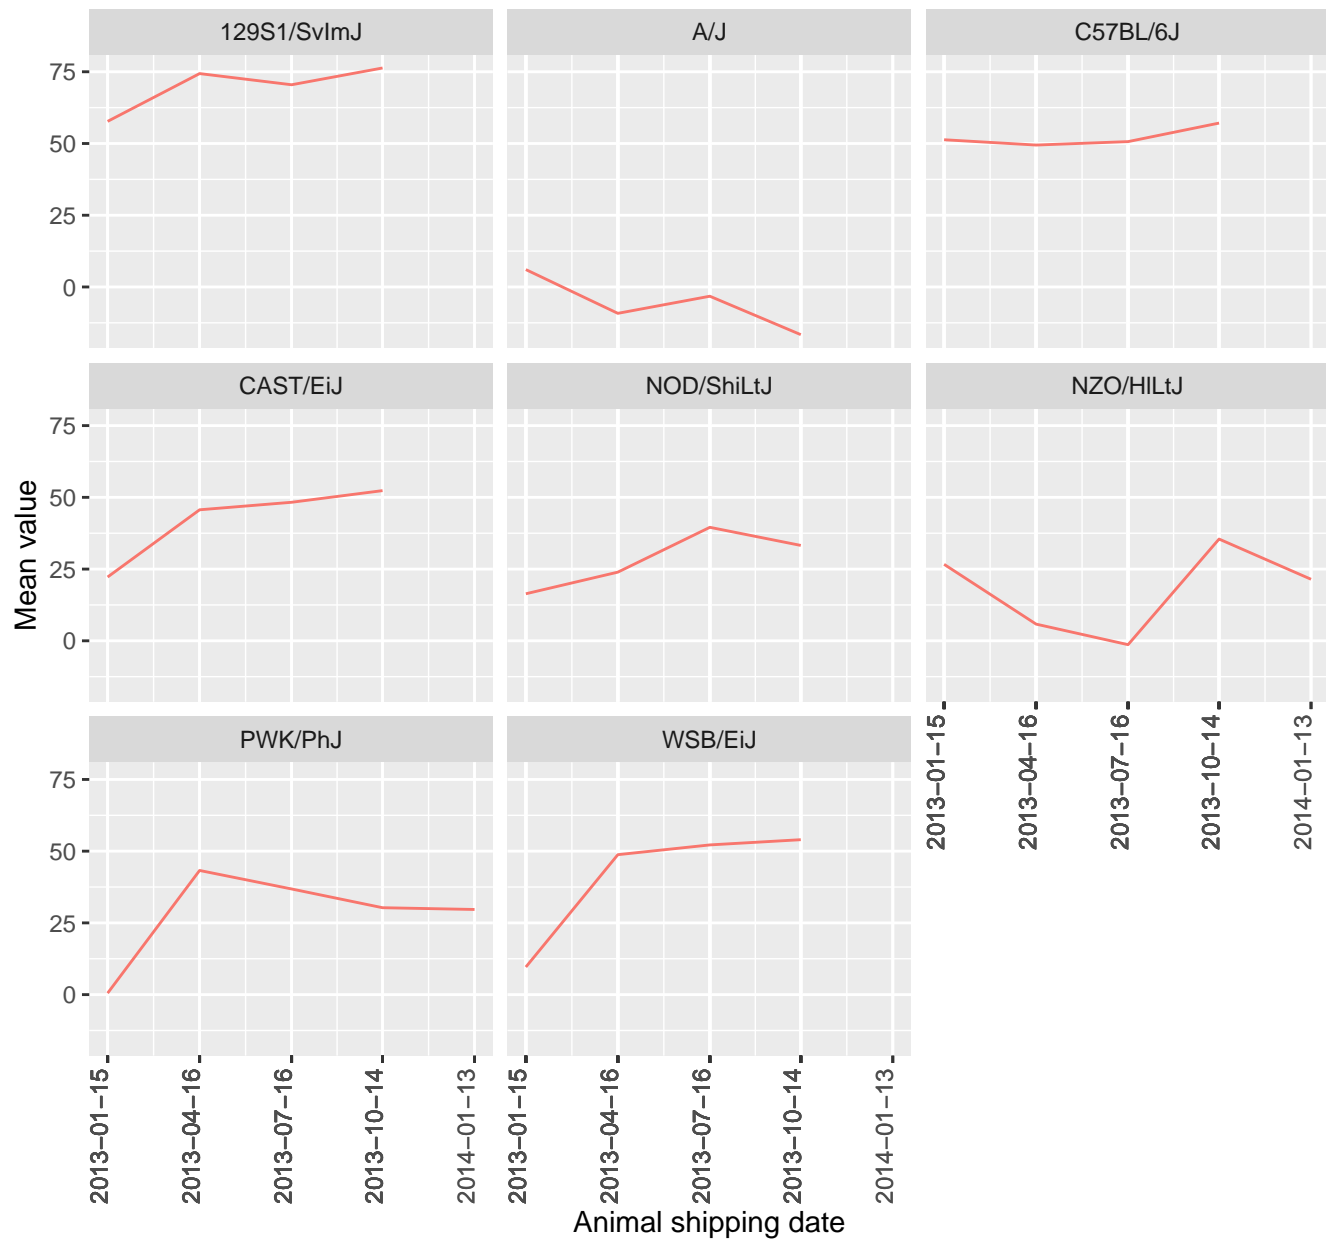

Procedure: GMC05  
Parameter: PPI\_73

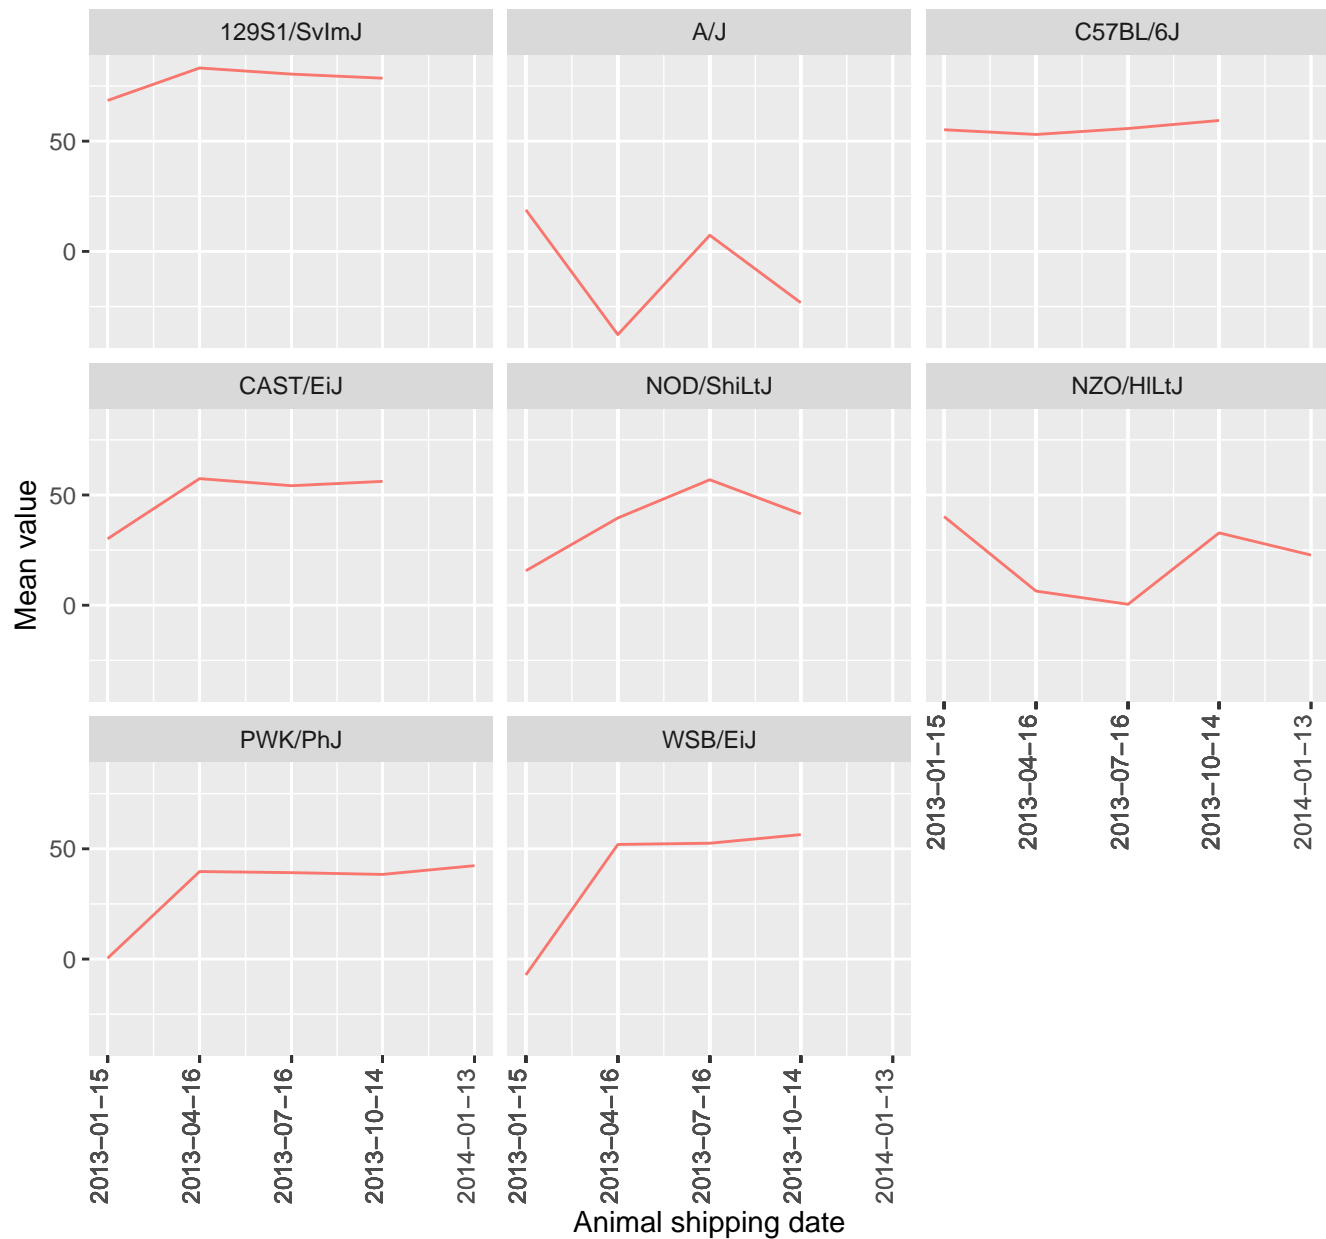

Procedure: GMC05  
Parameter: PPI\_81

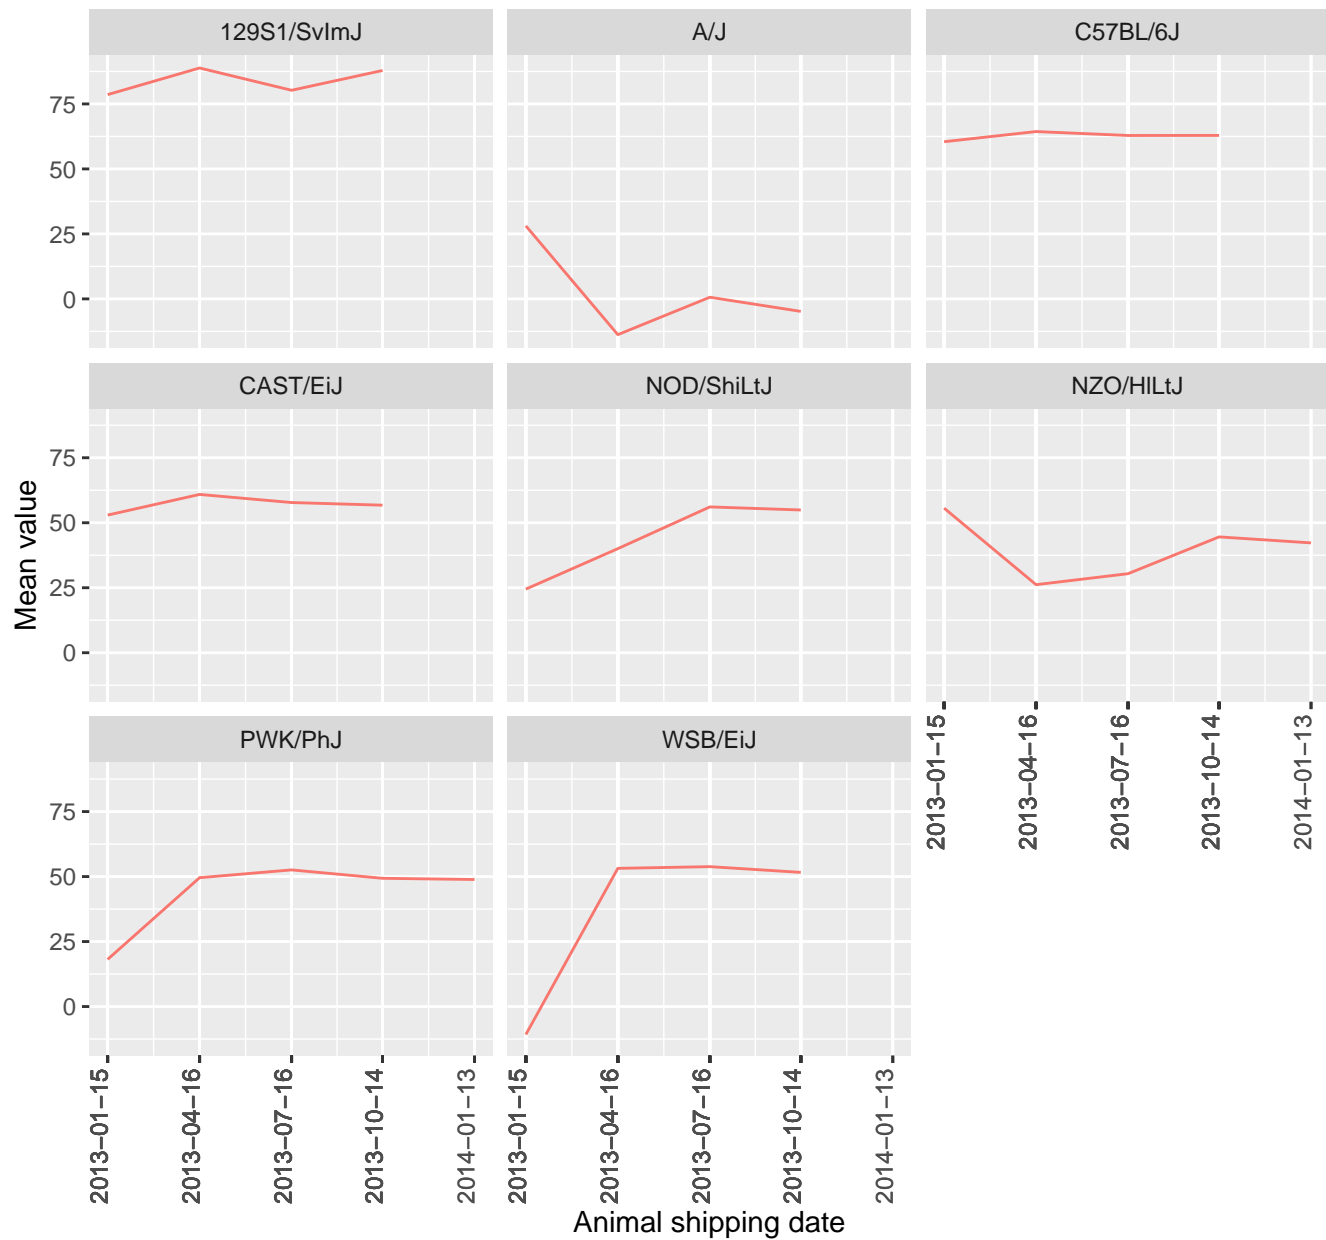

Procedure: GMC05  
Parameter: PPI\_global

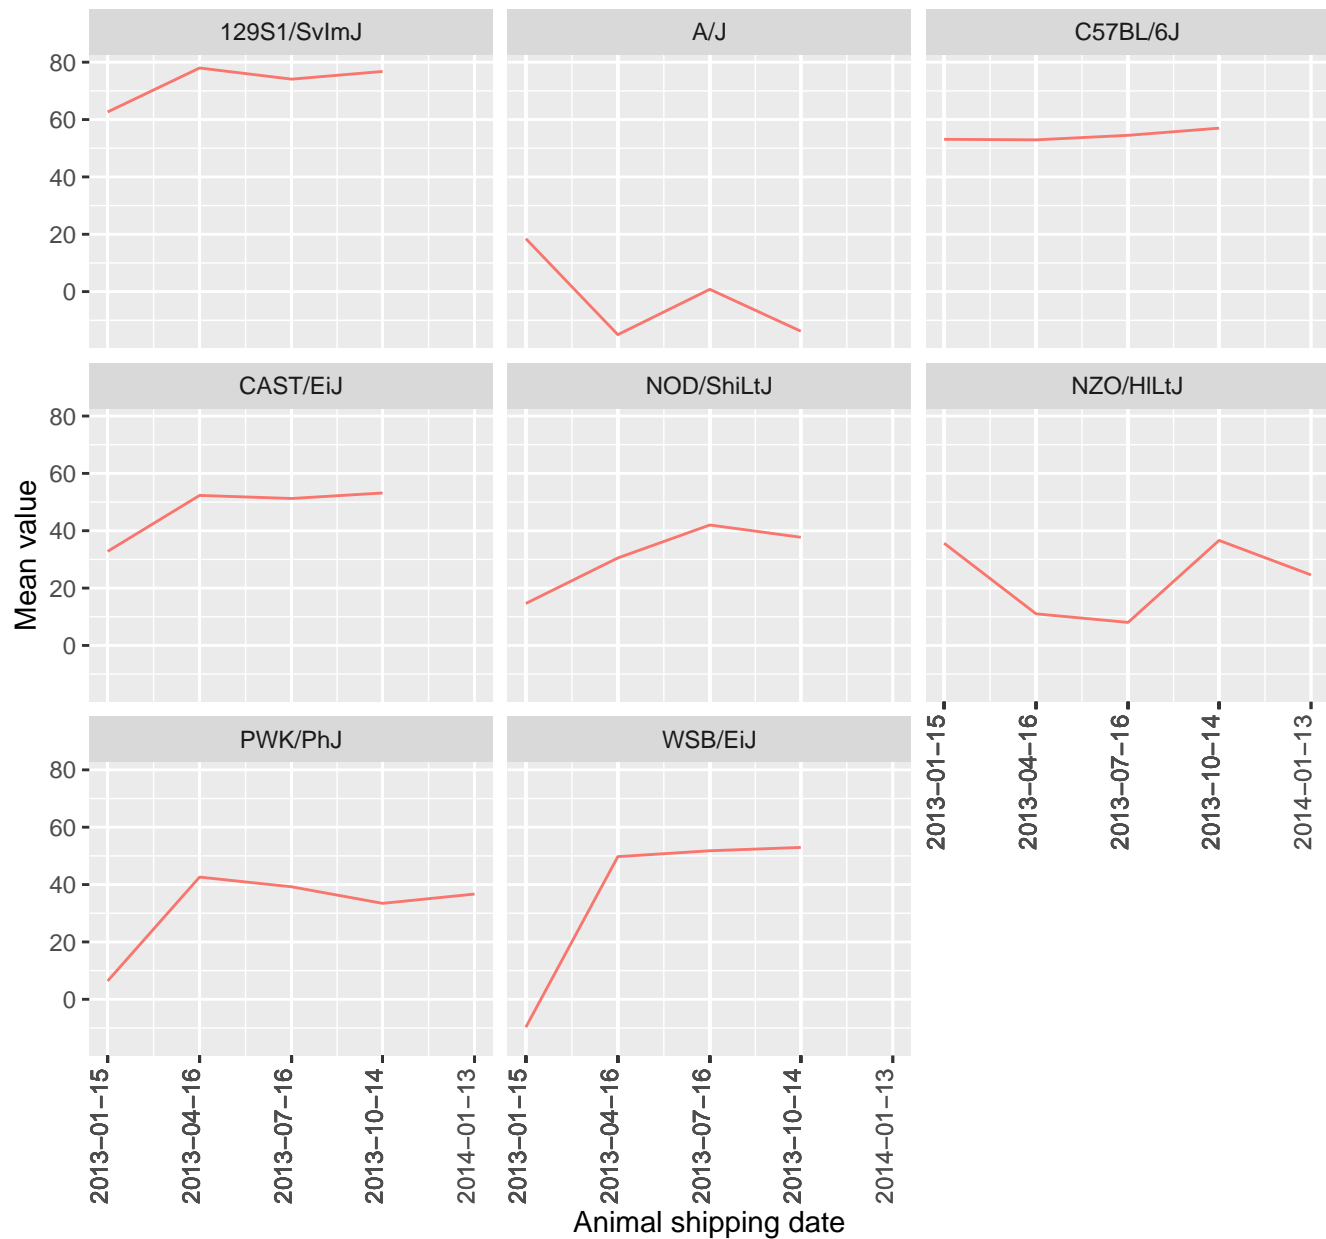

Procedure: GMC05  
Parameter: PPI\_ISI\_100

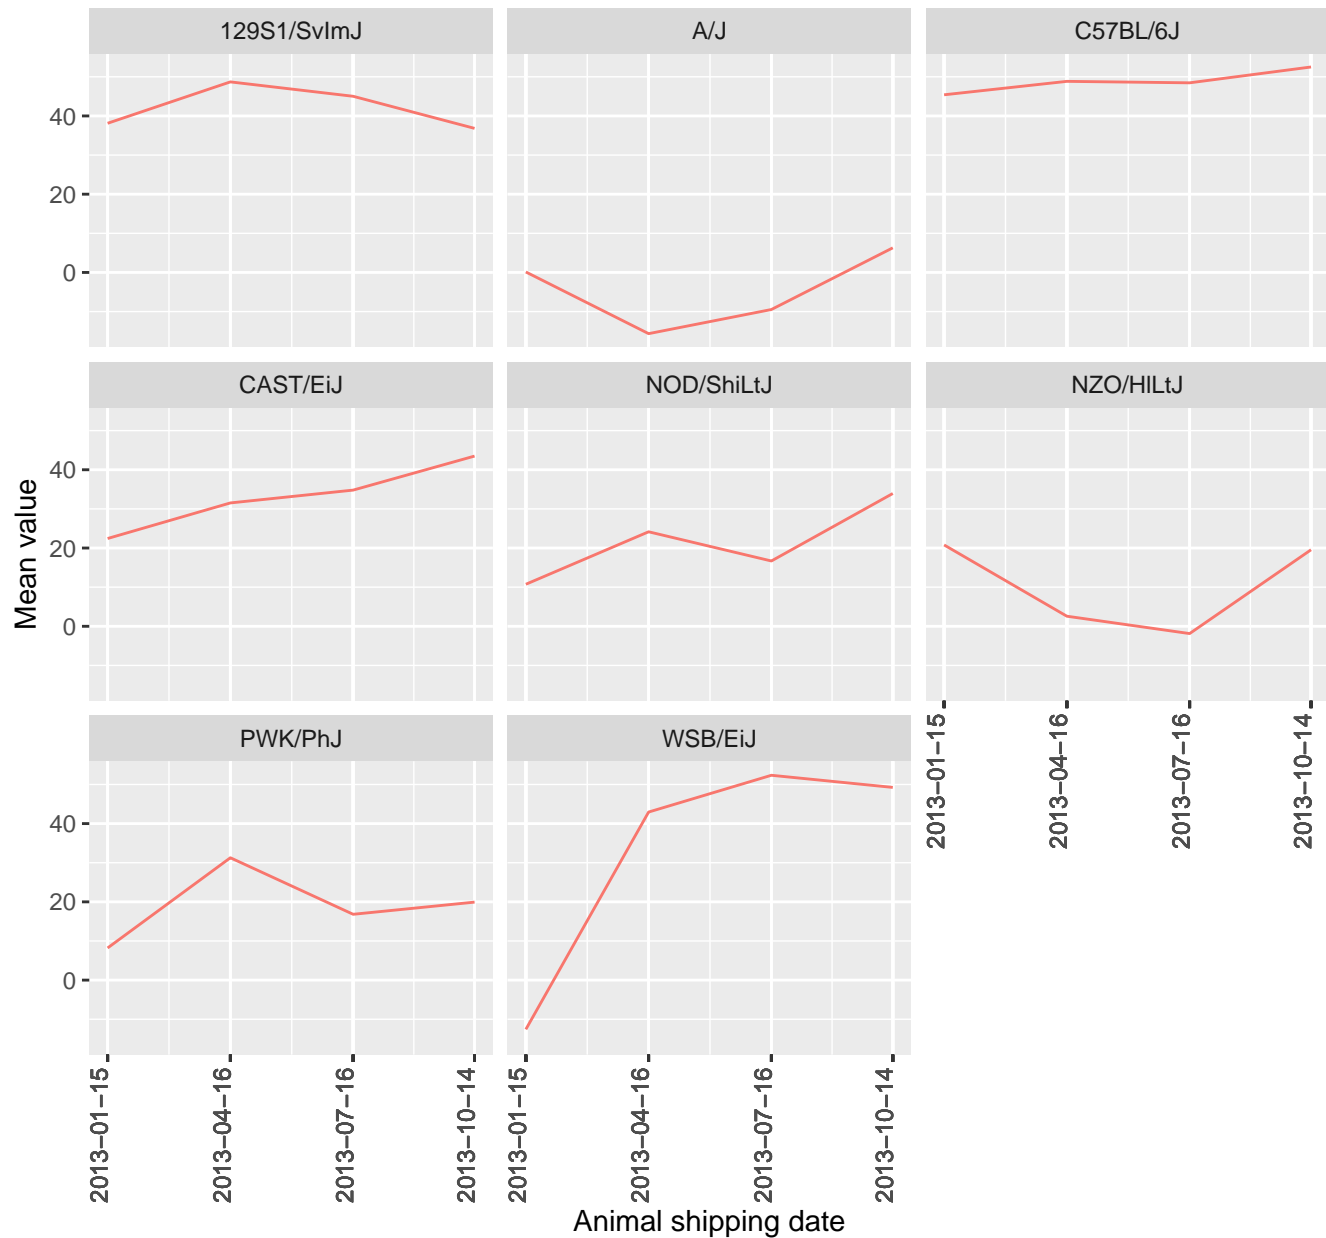

Procedure: GMC05  
Parameter: PPI\_ISI\_25

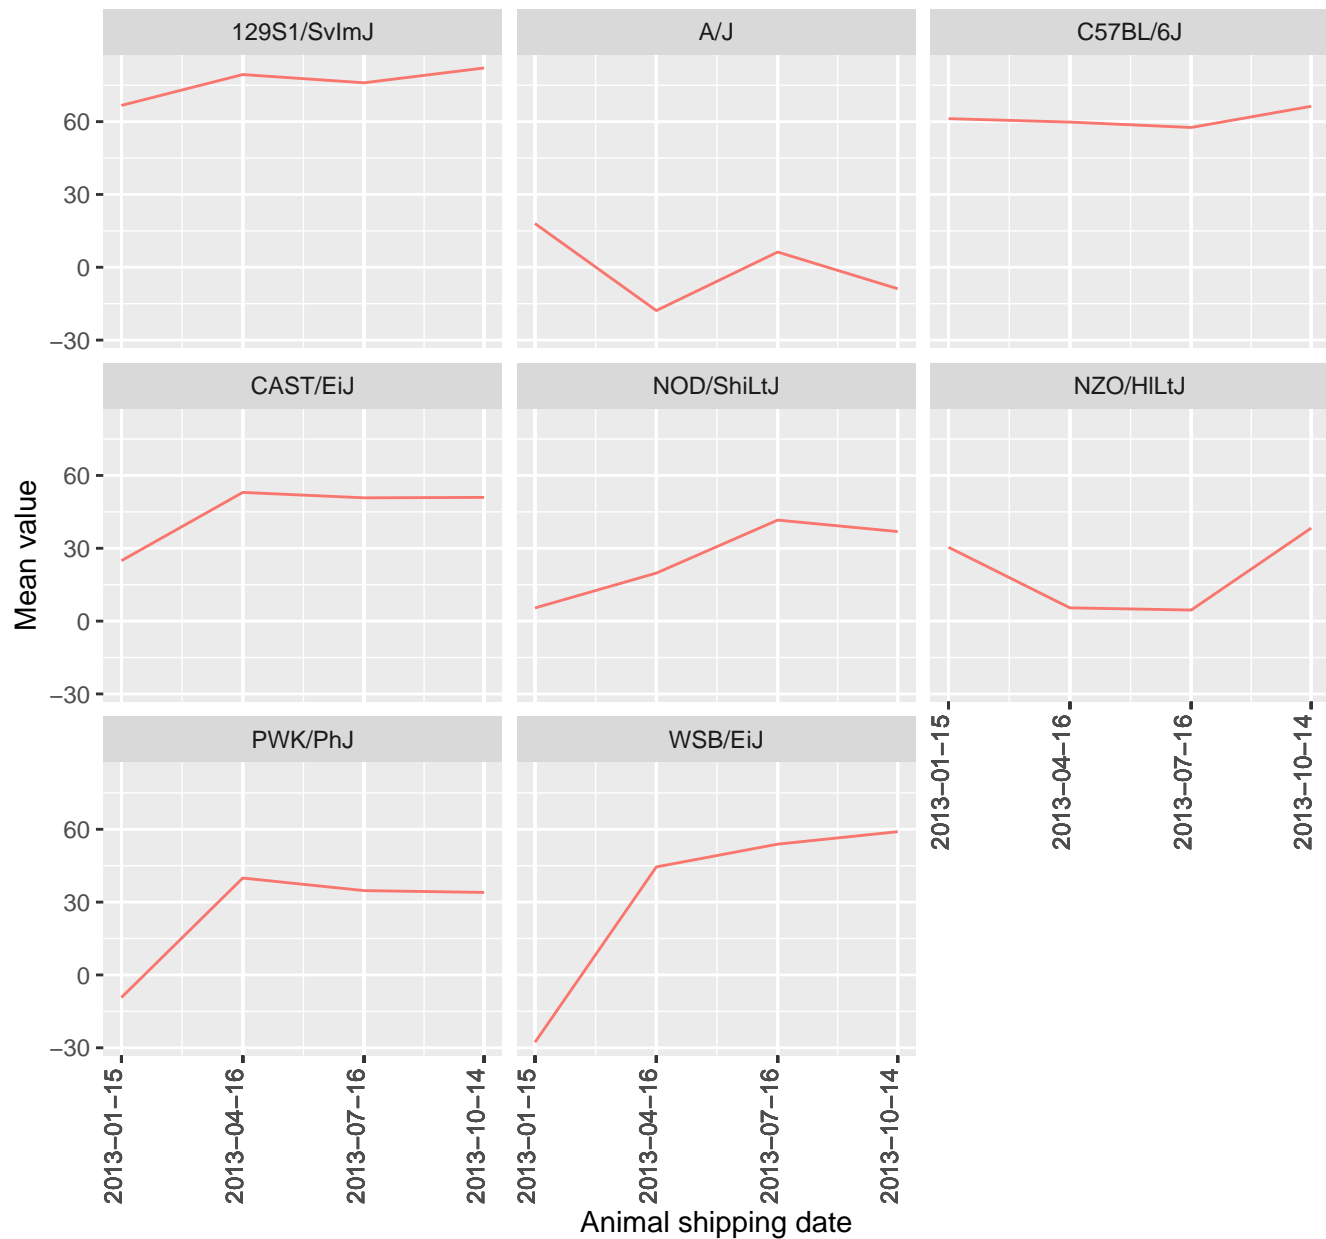

Procedure: GMC05  
Parameter: PPI\_ISI\_5

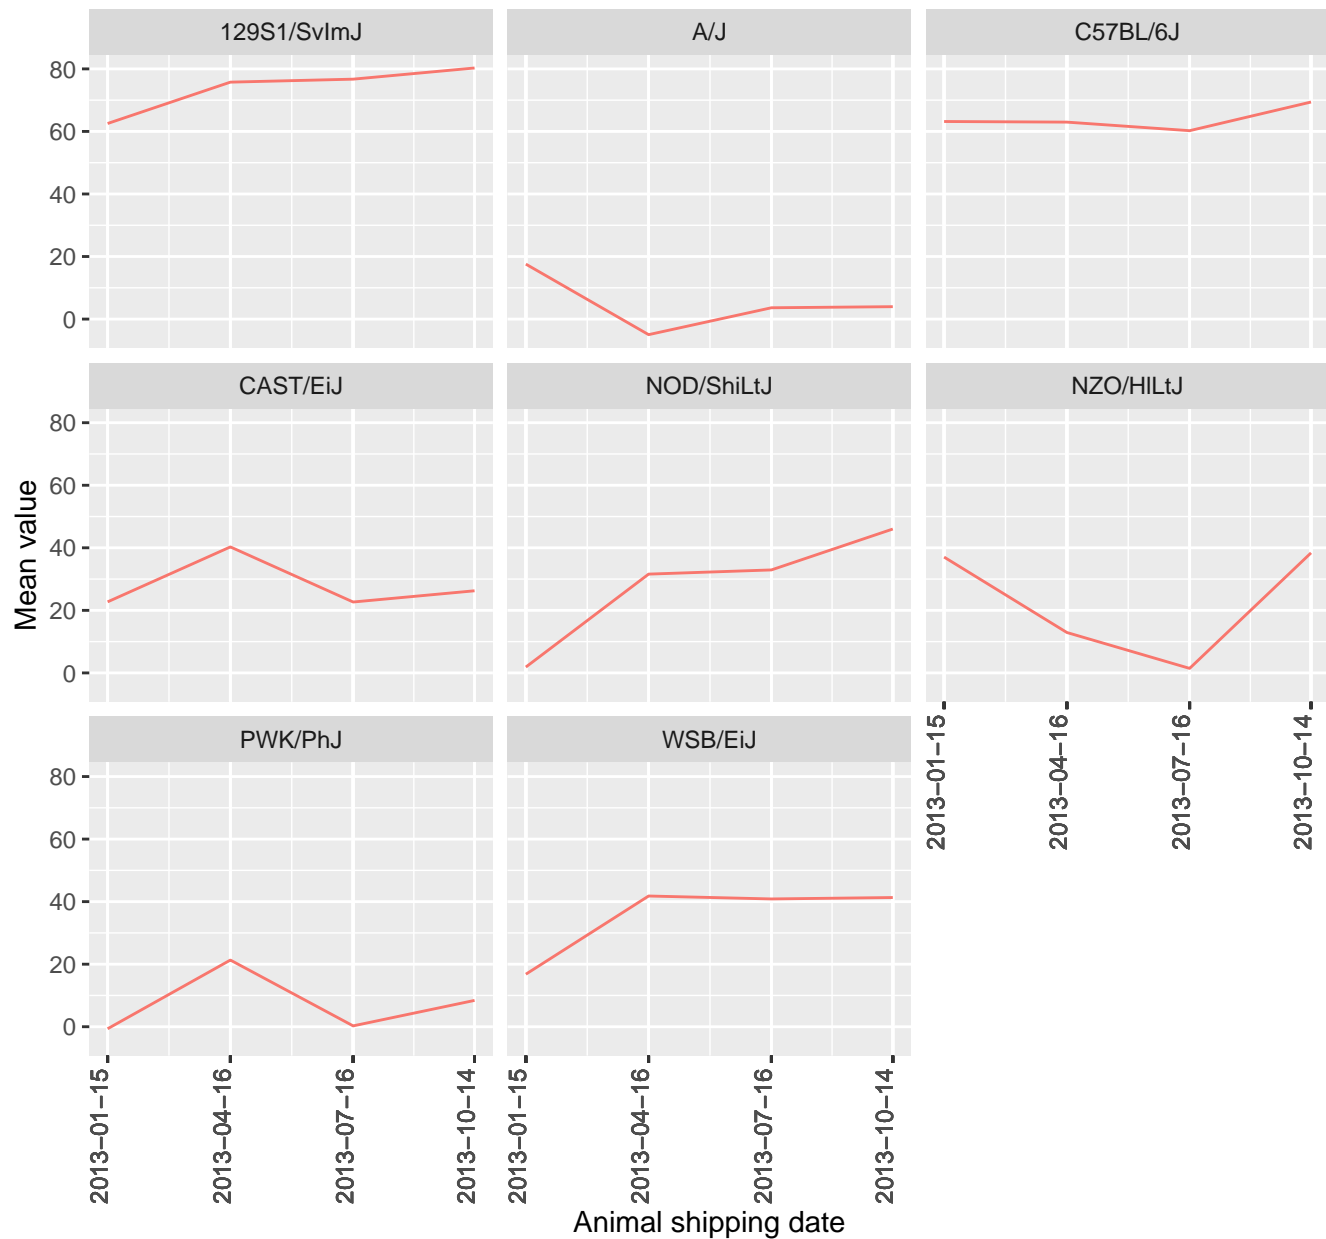

Procedure: GMC06  
Parameter: bw\_after\_fast

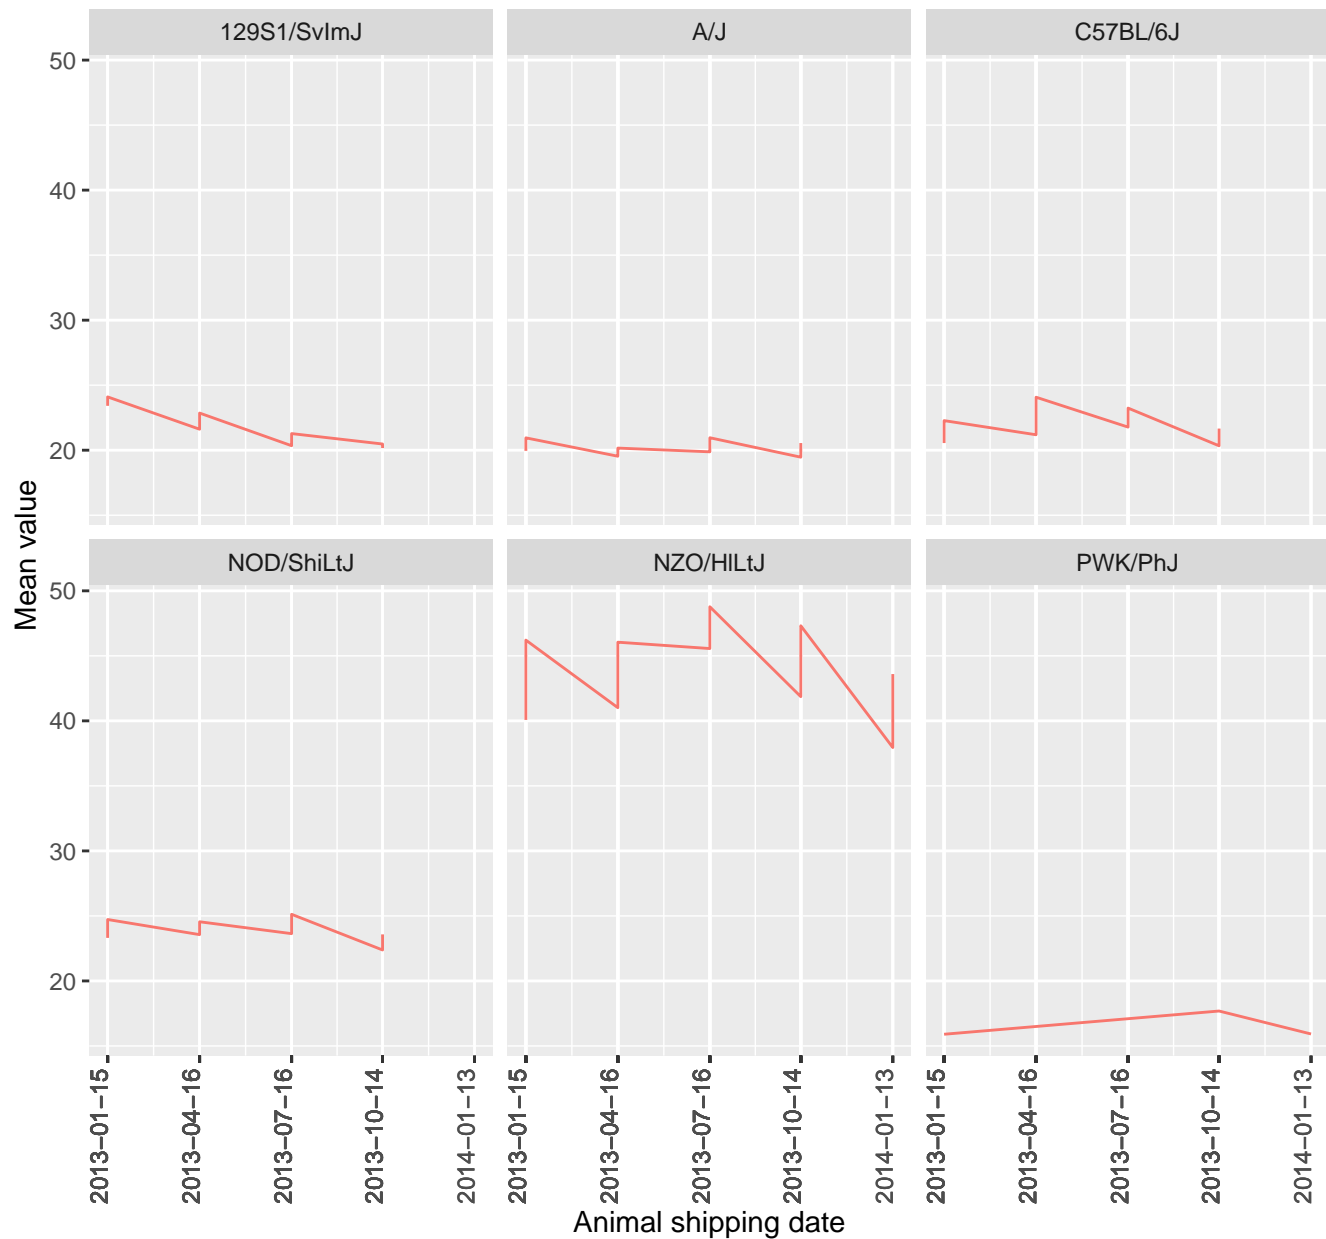



Procedure: GMC06

Parameter: CHOL

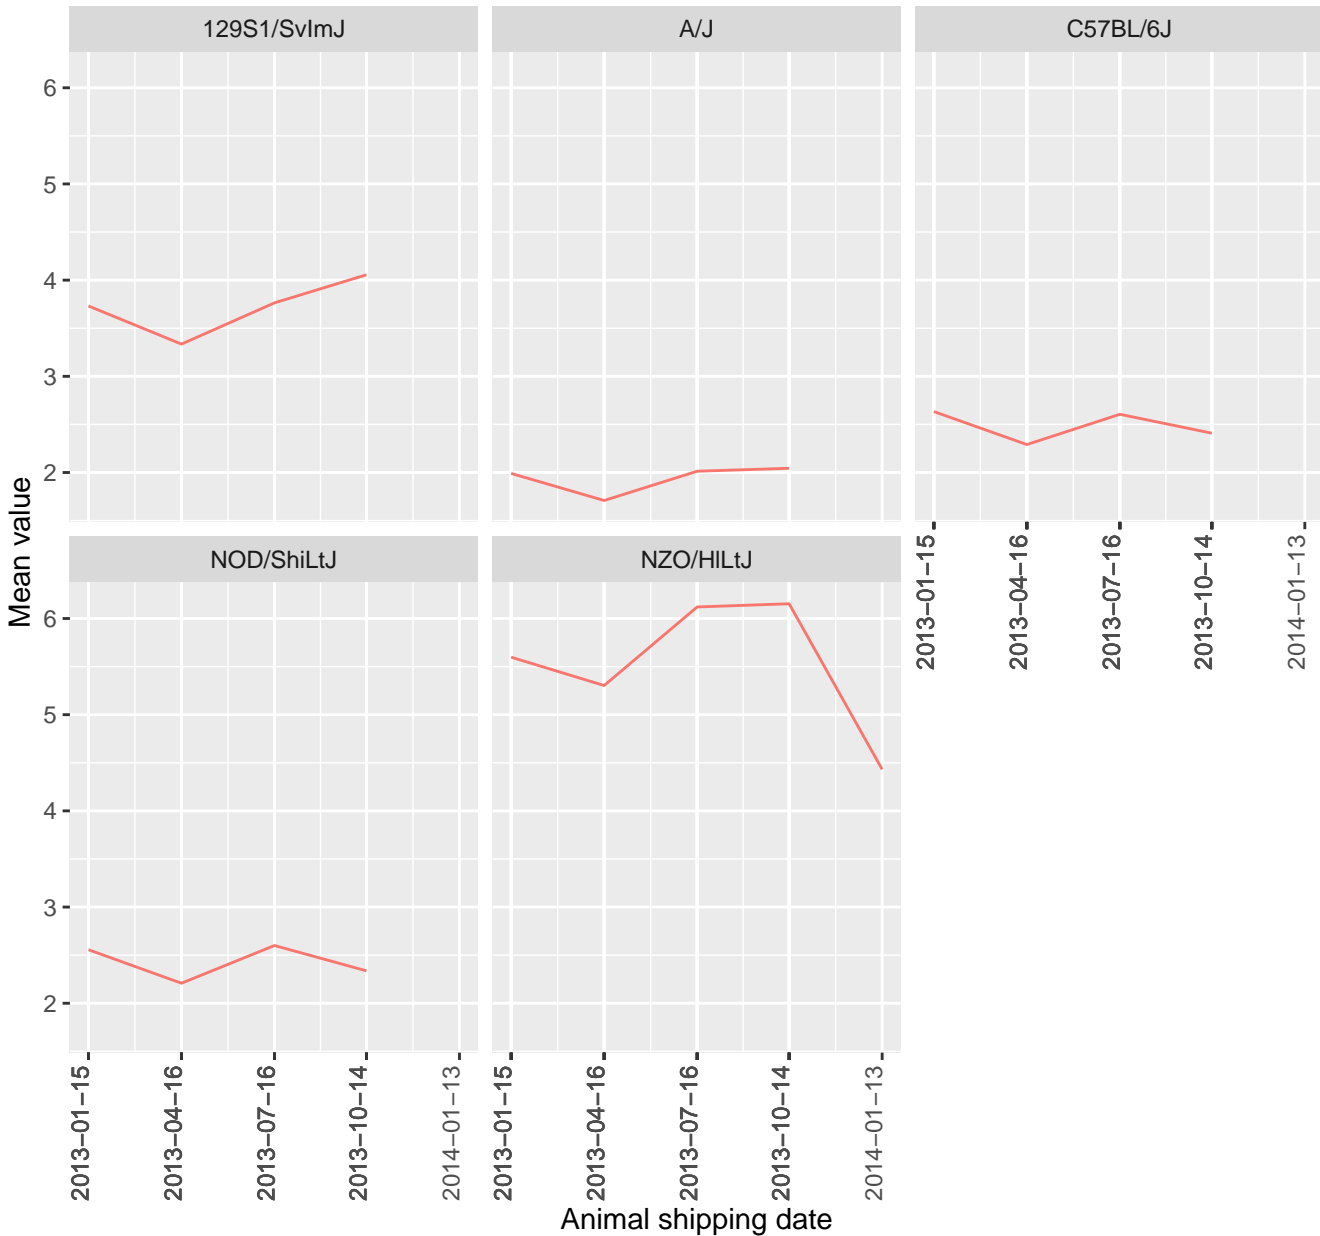

Procedure: GMC06

Parameter: GLU

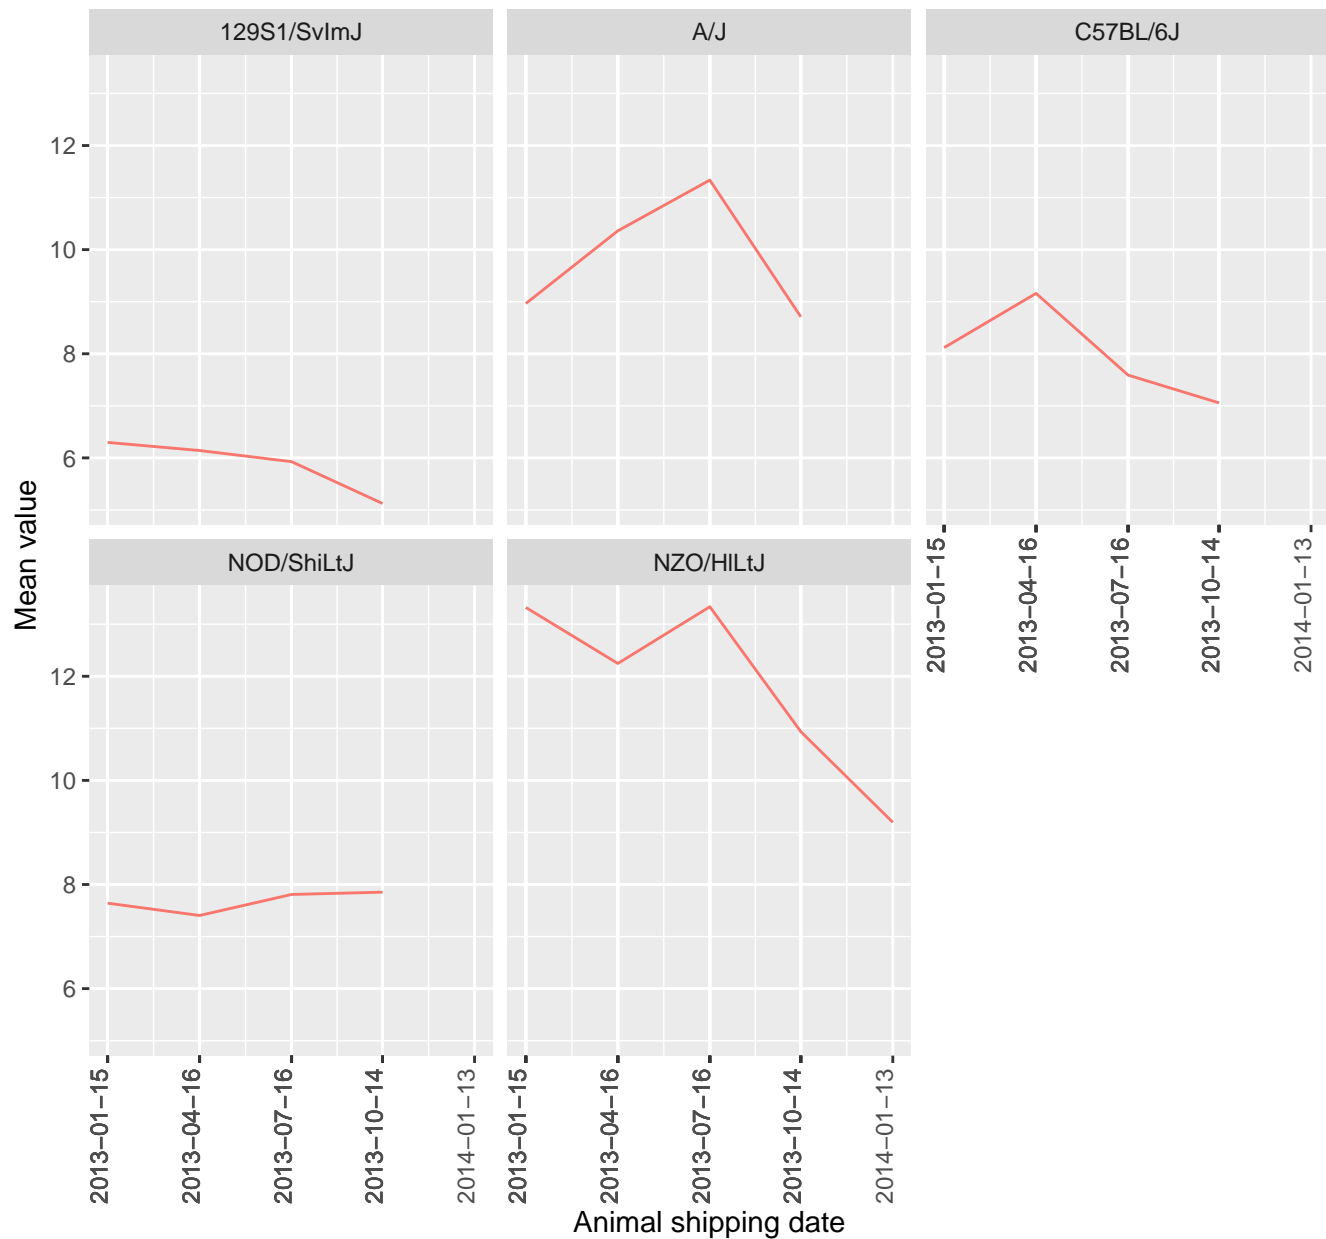

Procedure: GMC06  
Parameter: Glycerol

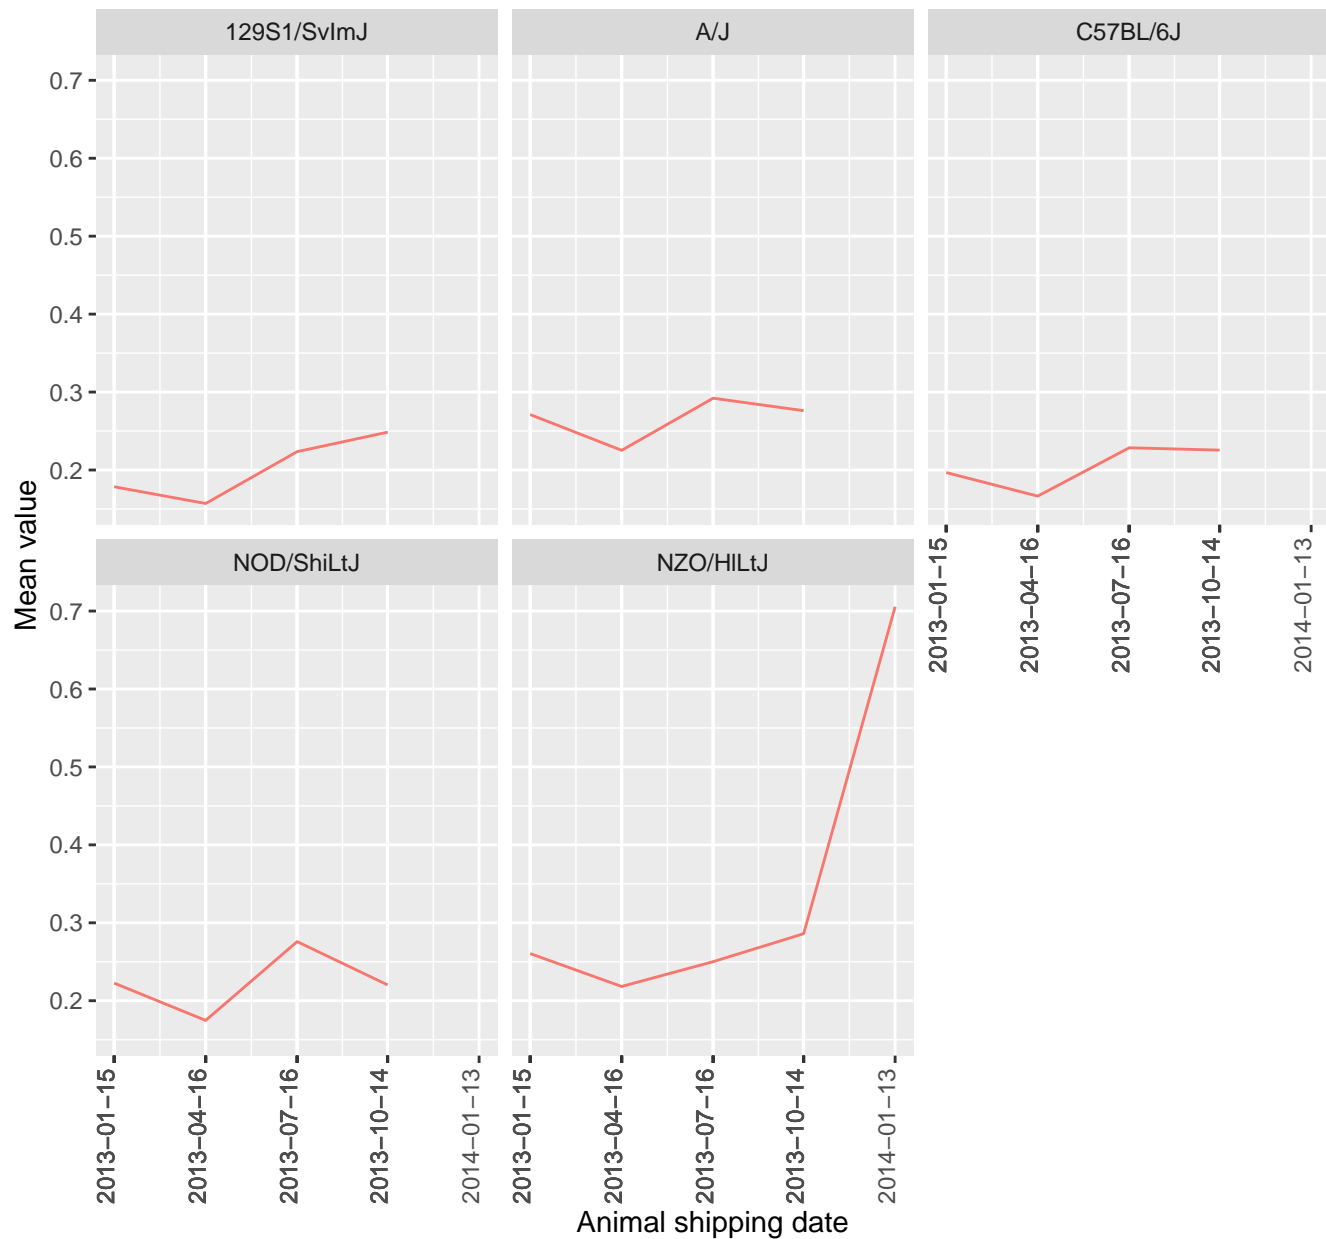

Procedure: GMC06  
Parameter: HDL

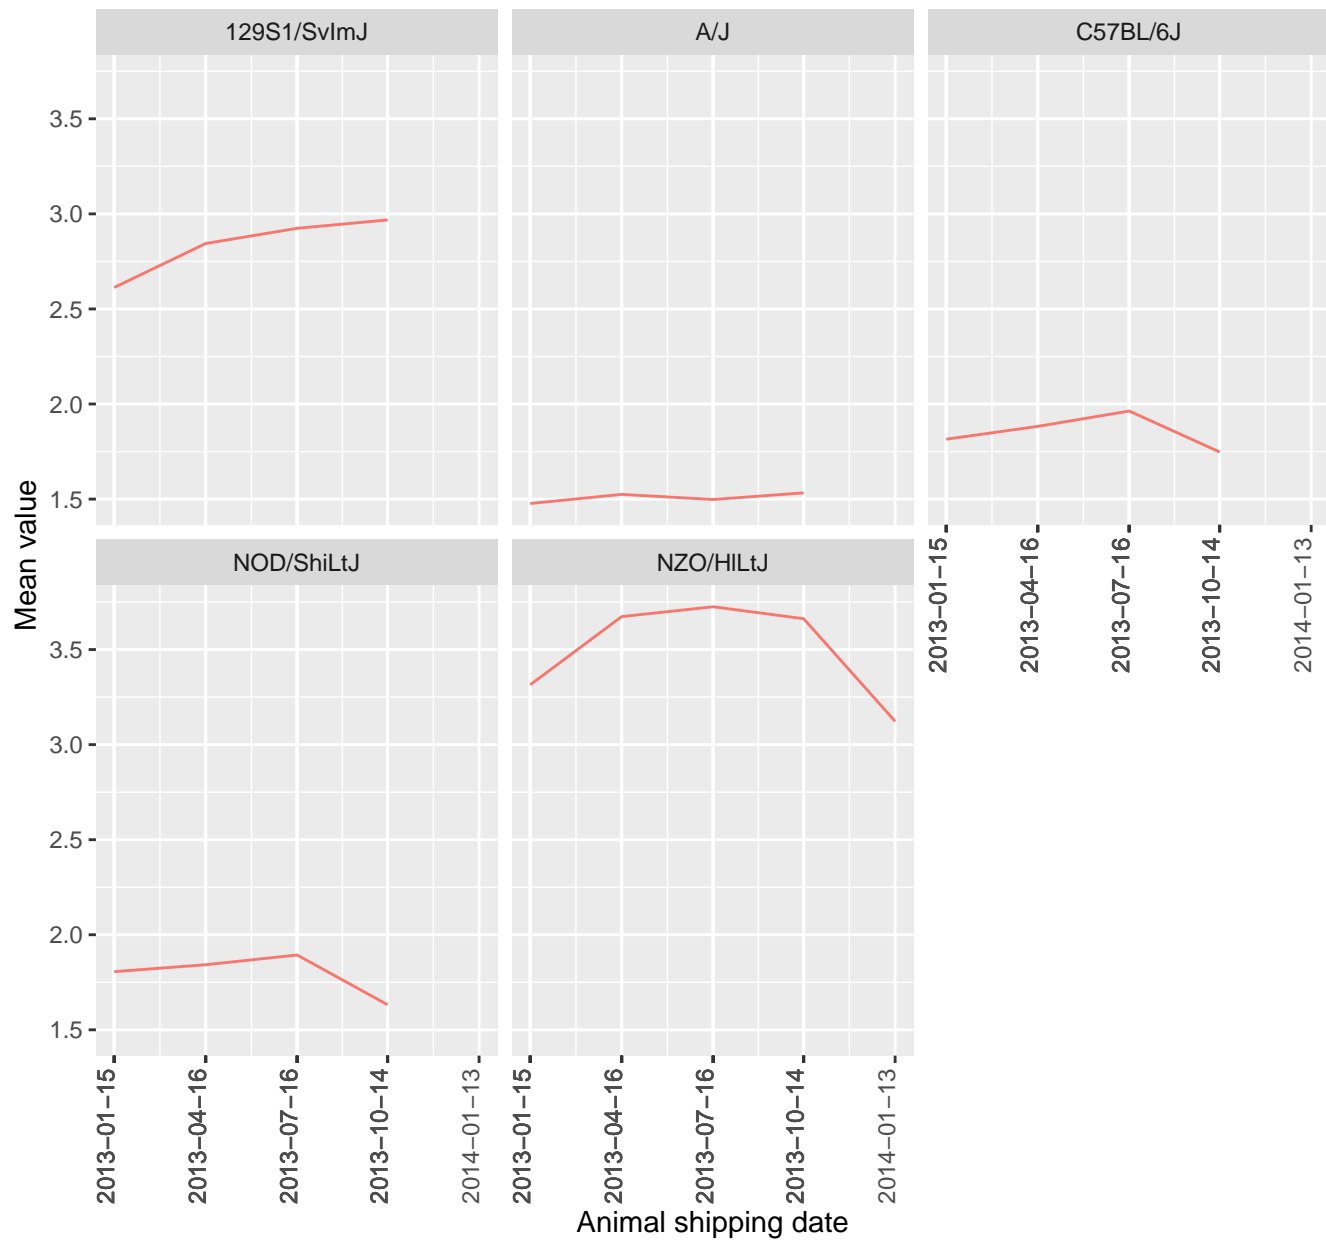

Procedure: GMC06  
Parameter: NEFA

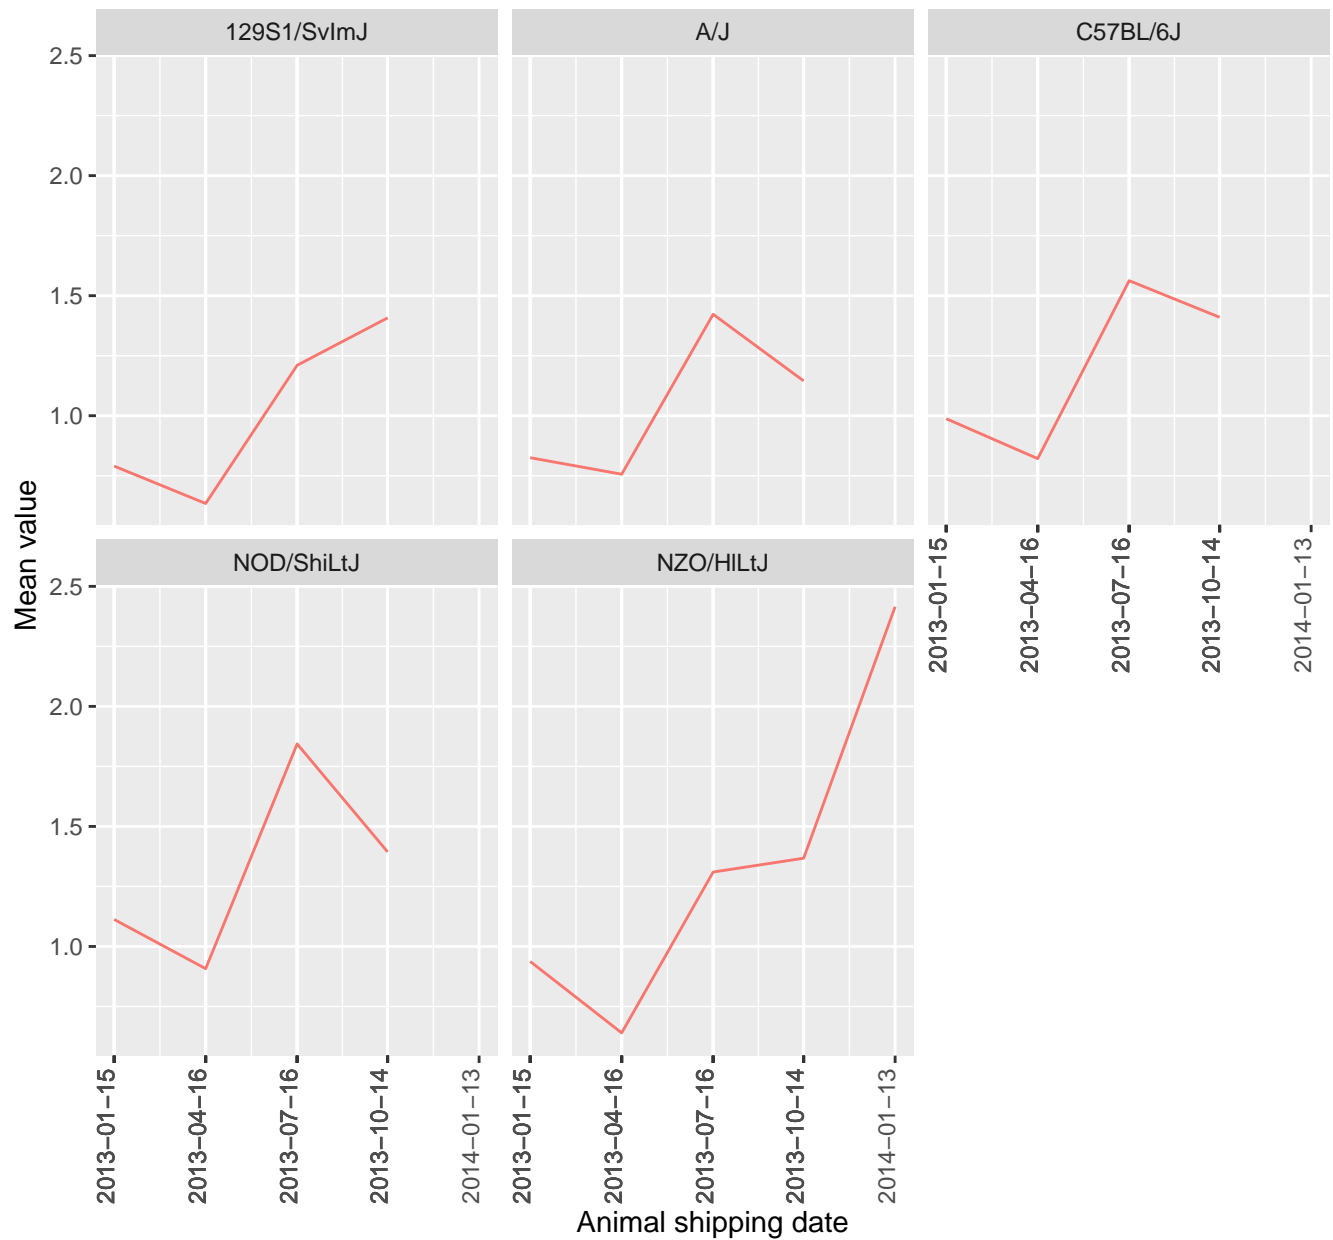

Procedure: GMC06  
Parameter: nonHDL

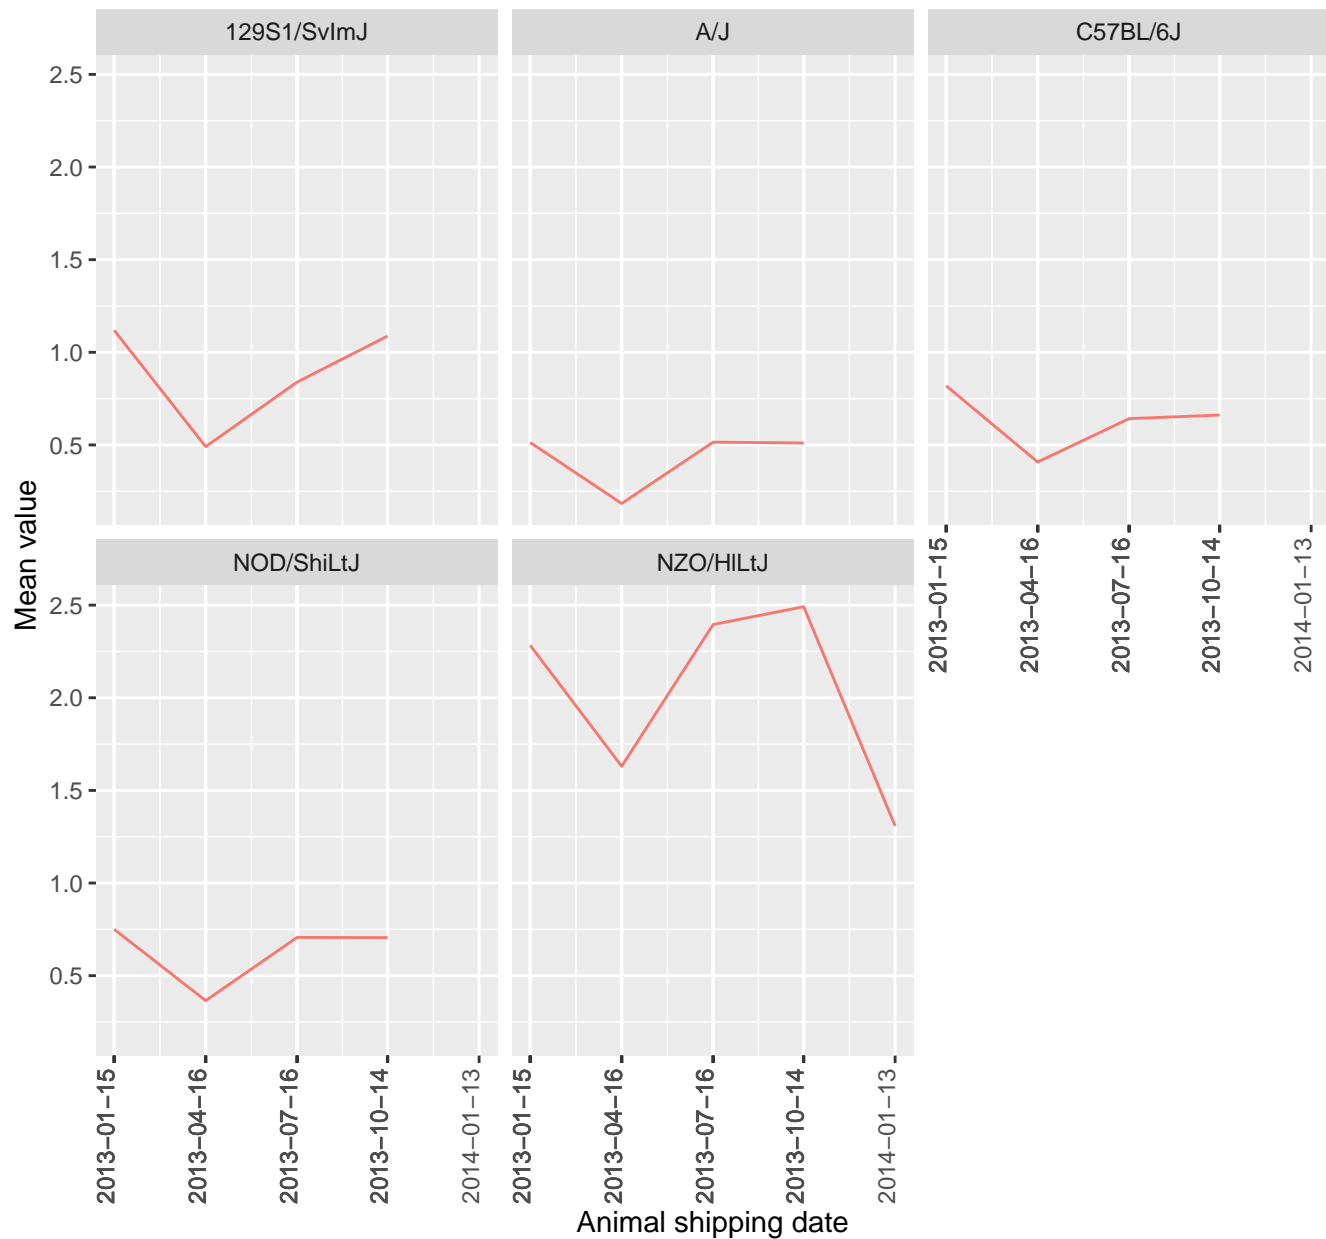

Procedure: GMC06  
Parameter: TG

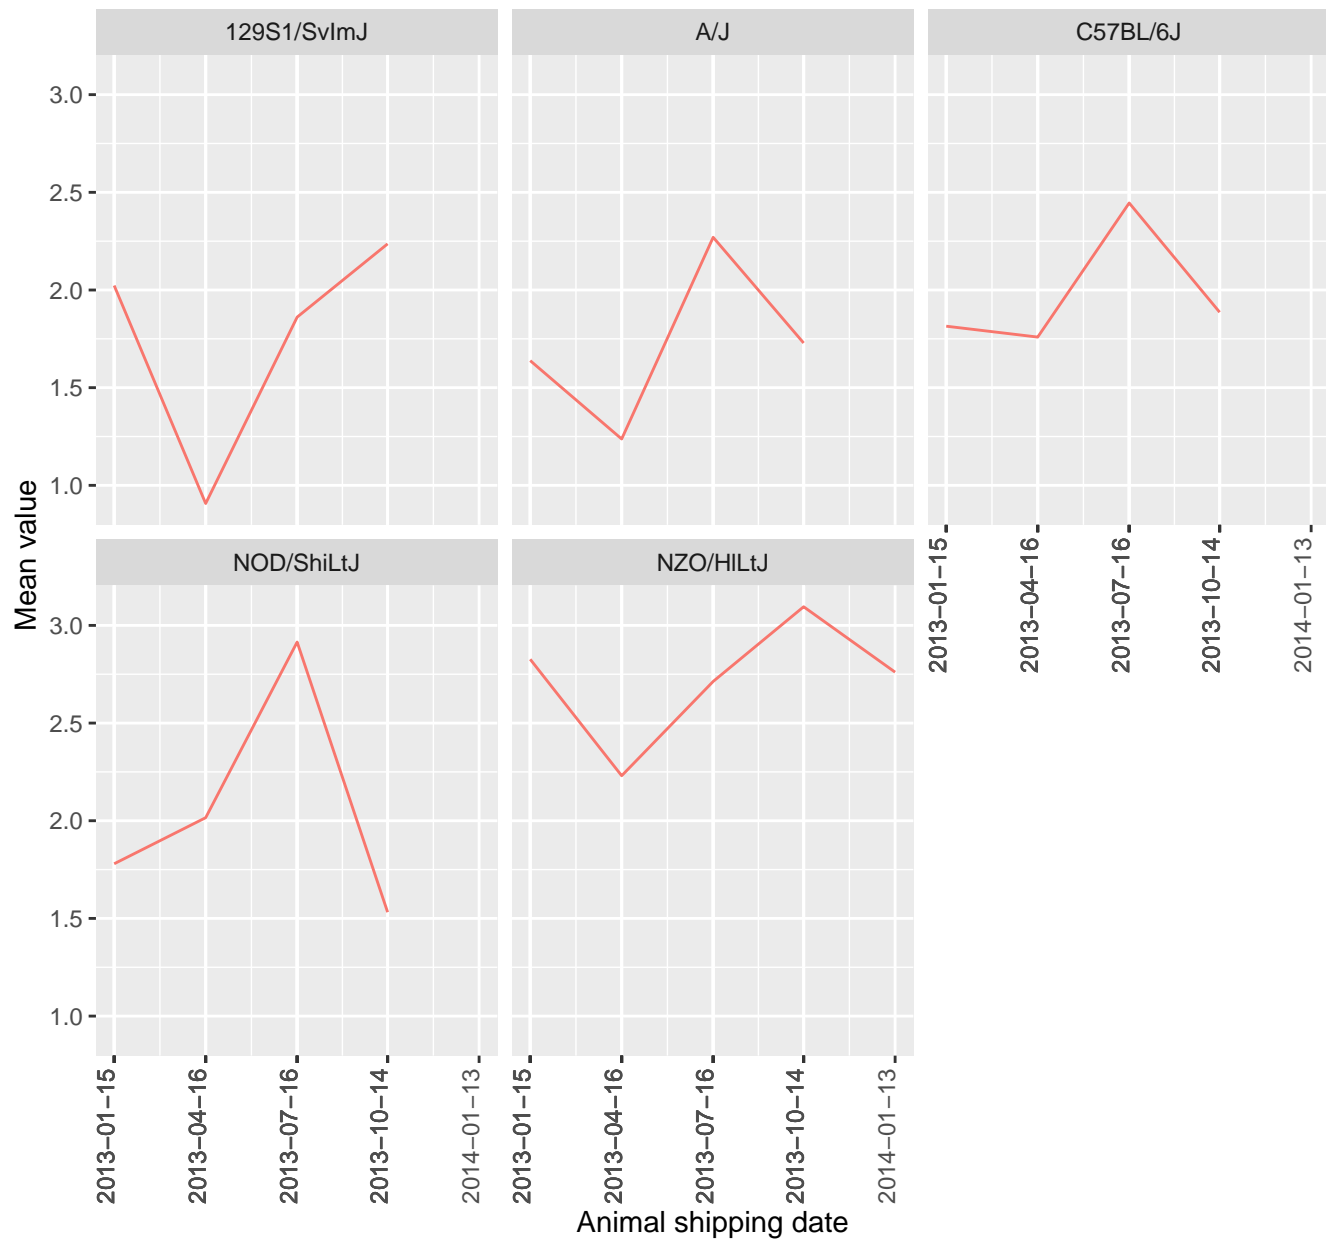

Procedure: GMC07  
Parameter: latency\_1

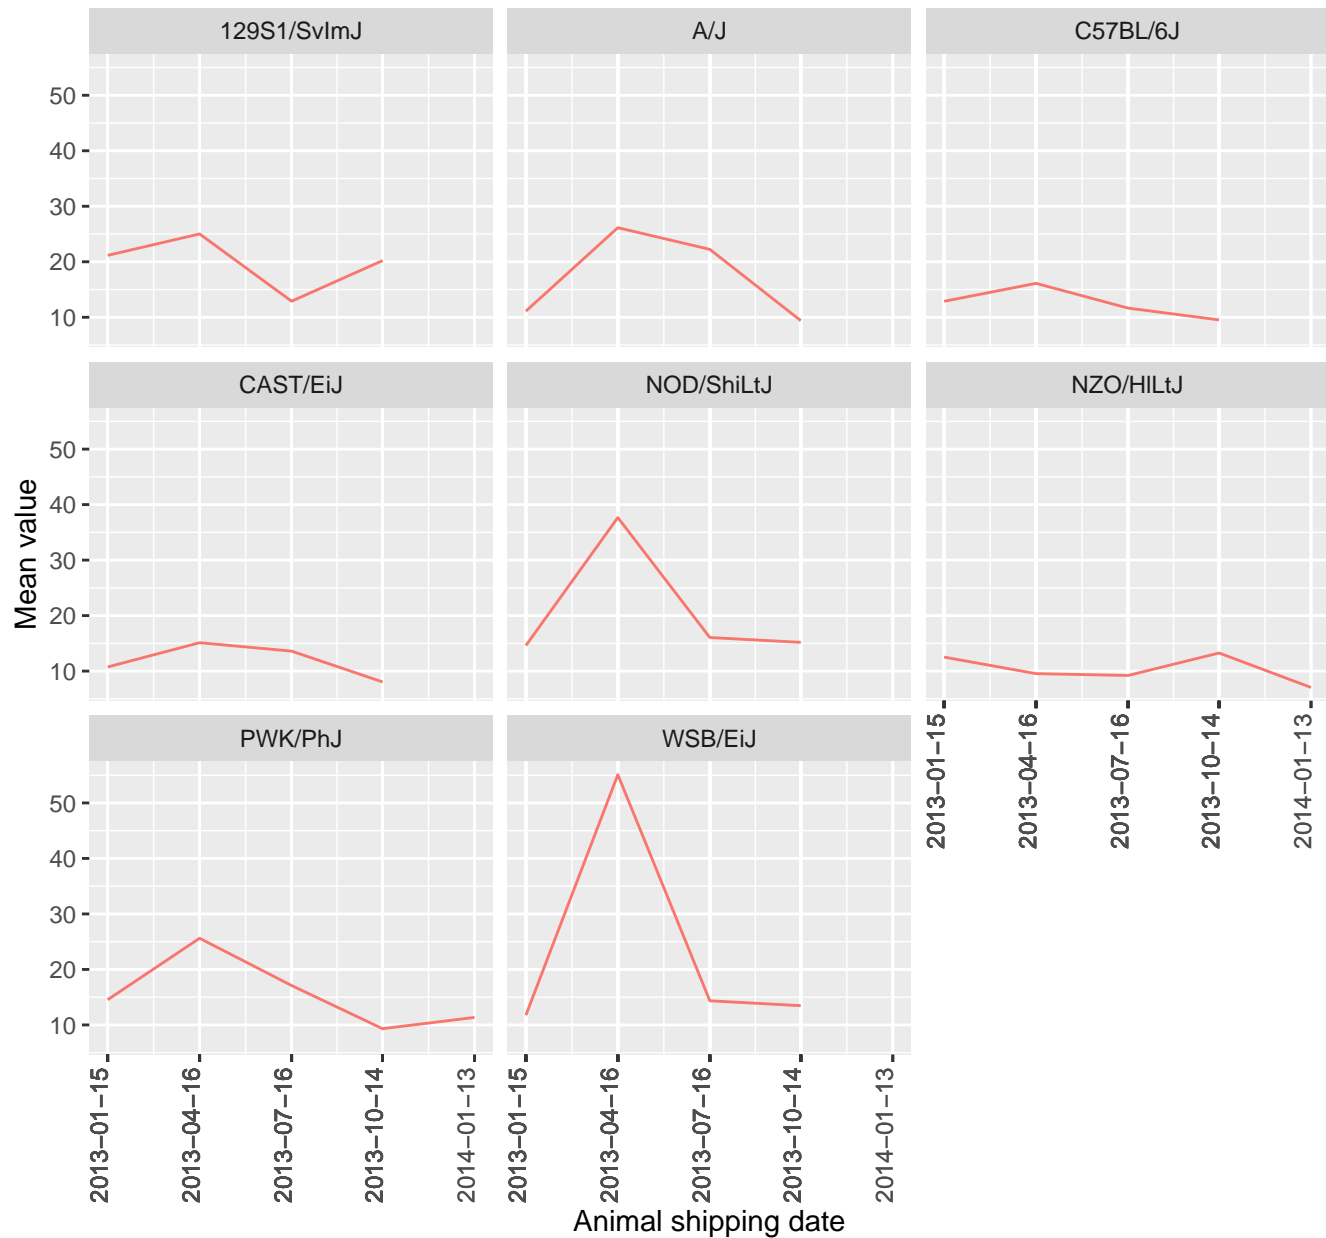



Procedure: GMC07  
Parameter: latency\_2

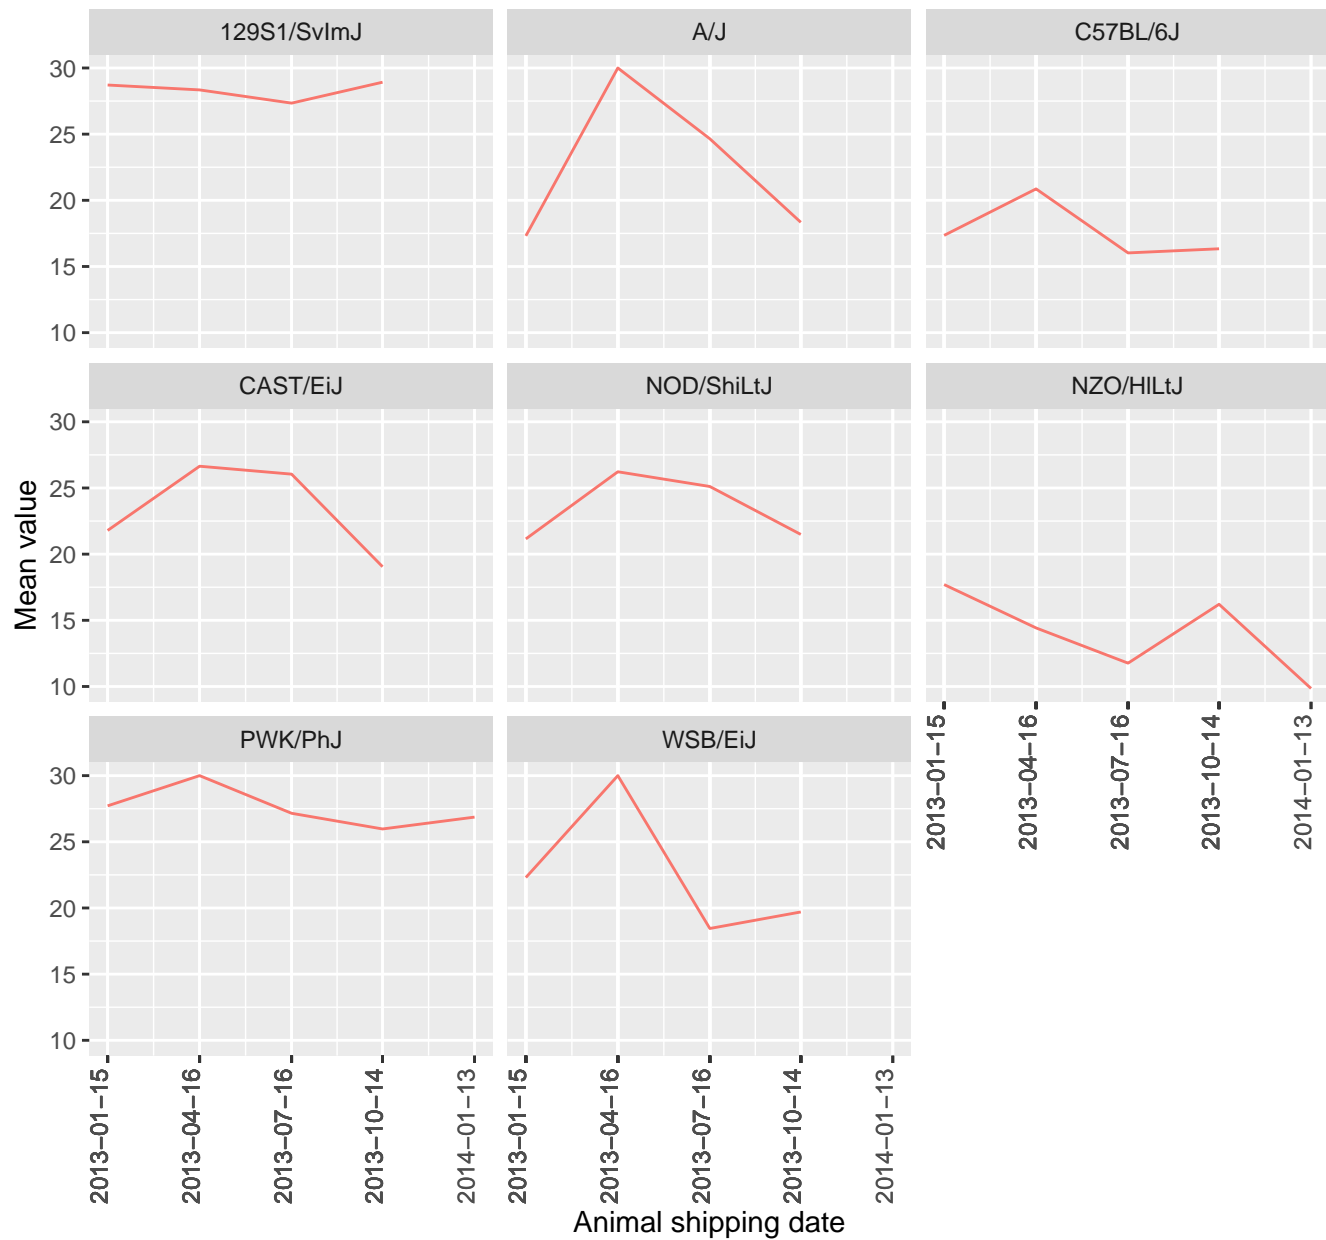

Procedure: GMC07

Parameter: response\_1

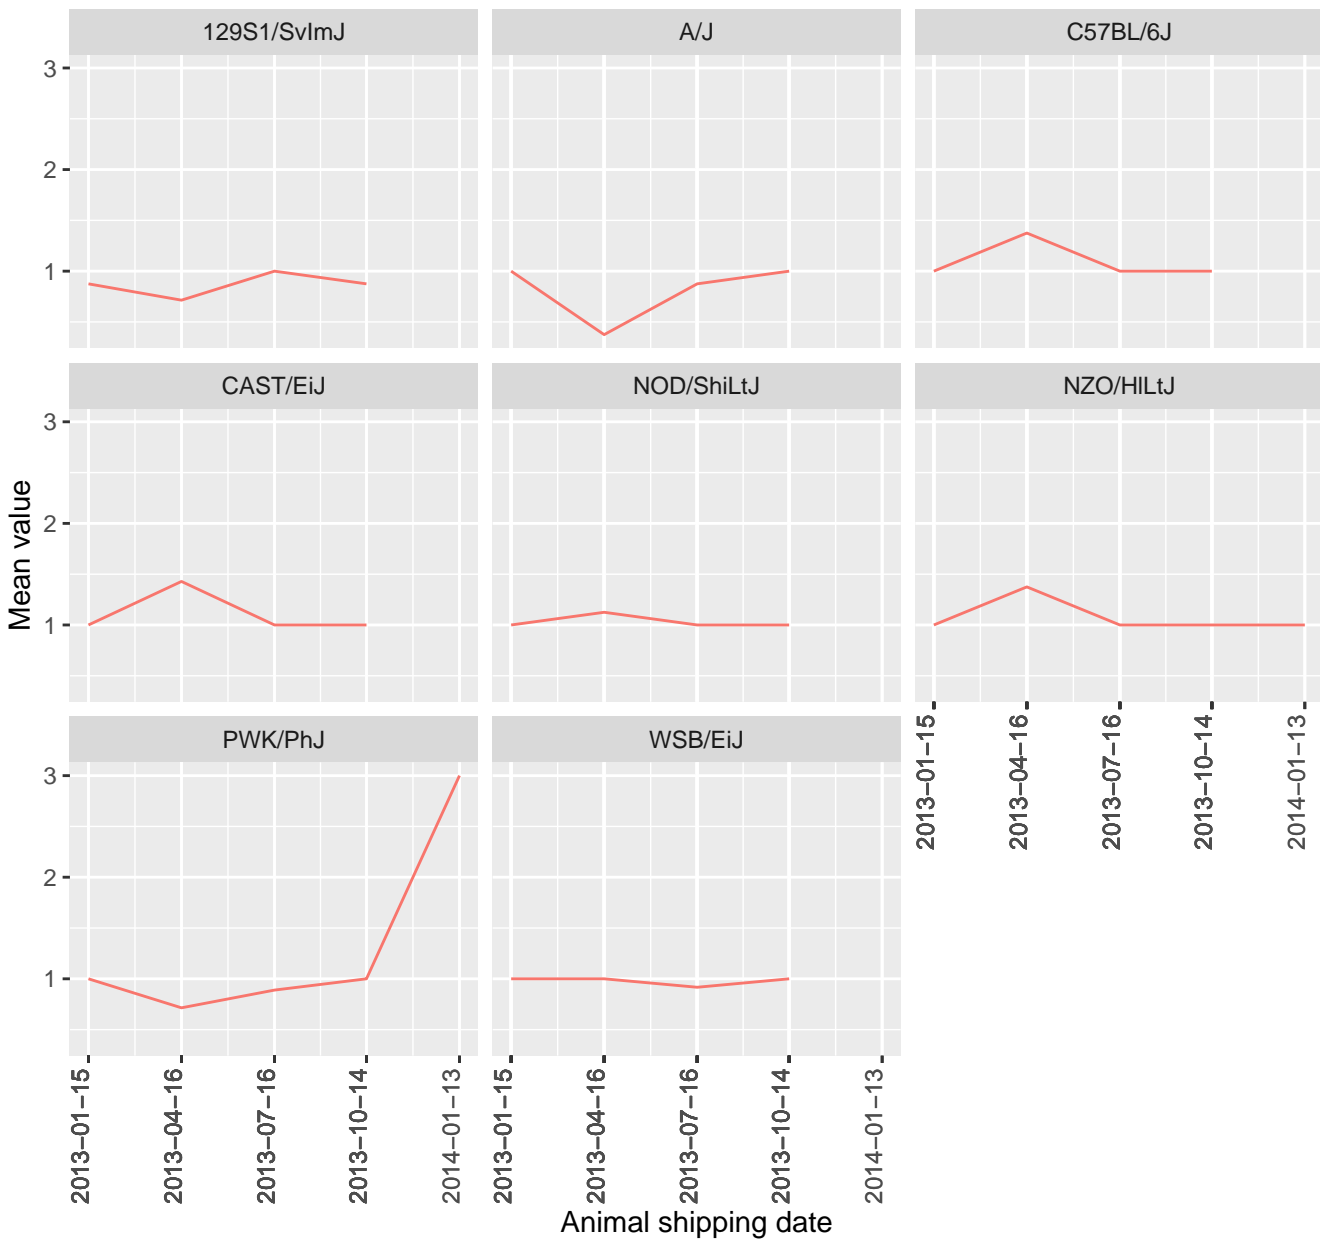

Procedure: GMC07  
Parameter: response\_2

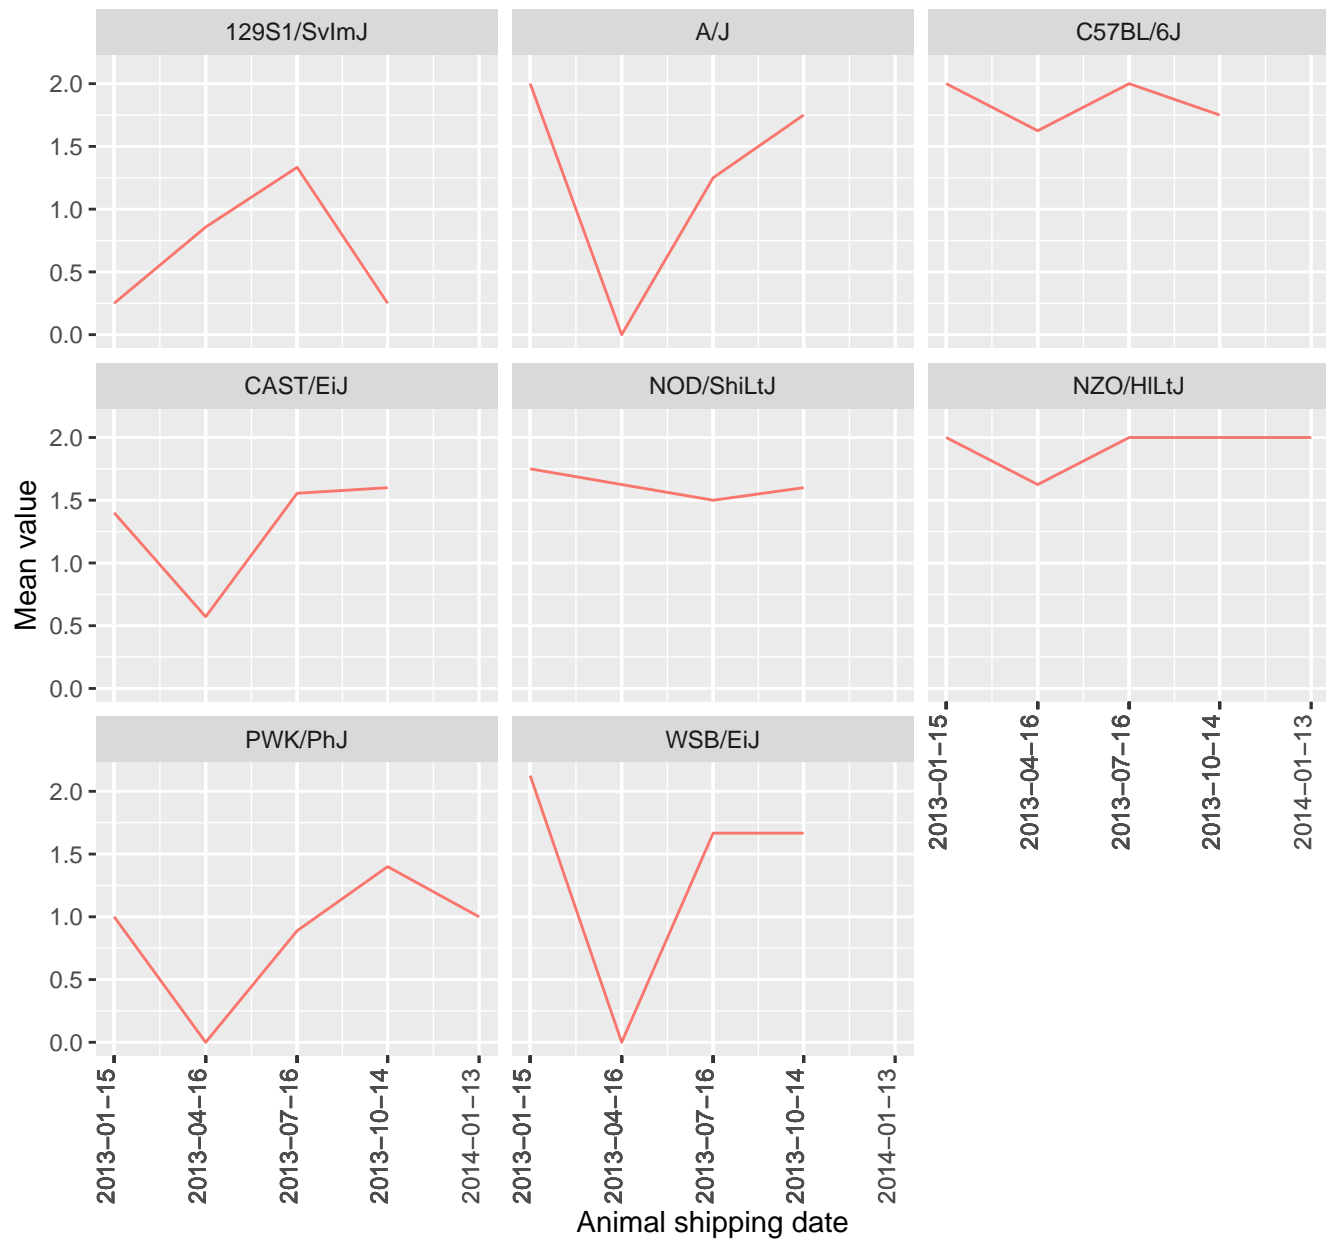

Procedure: GMC08  
Parameter: SSWL

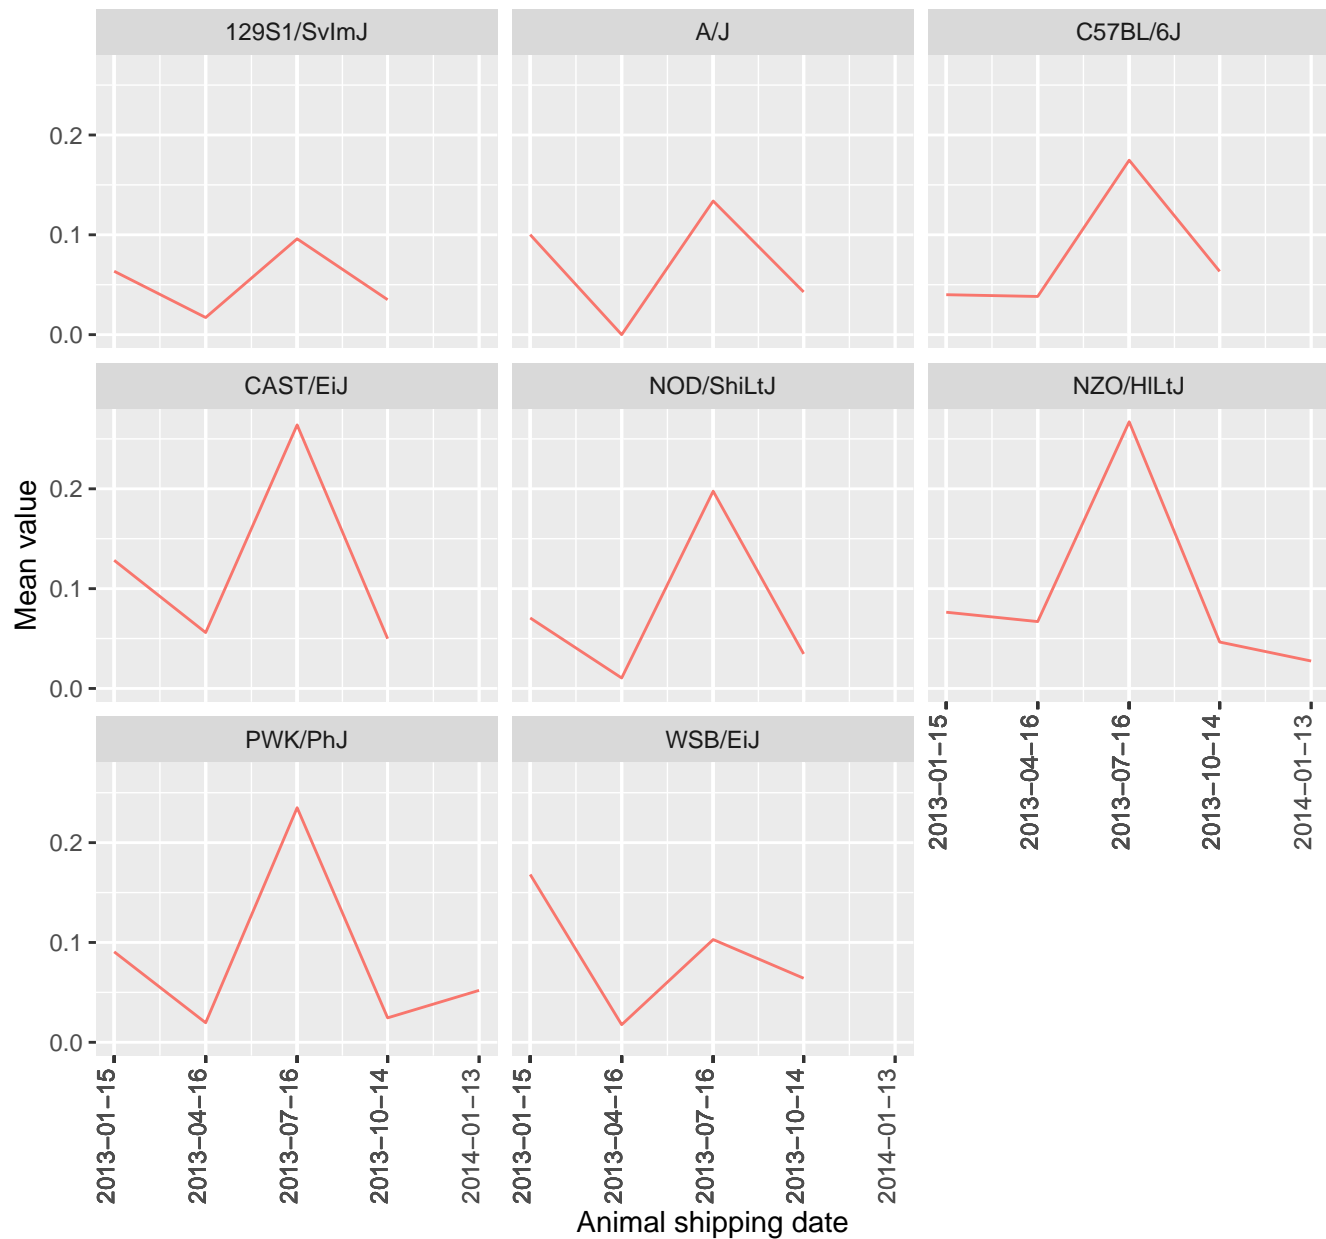

Procedure: GMC08  
Parameter: TEWL

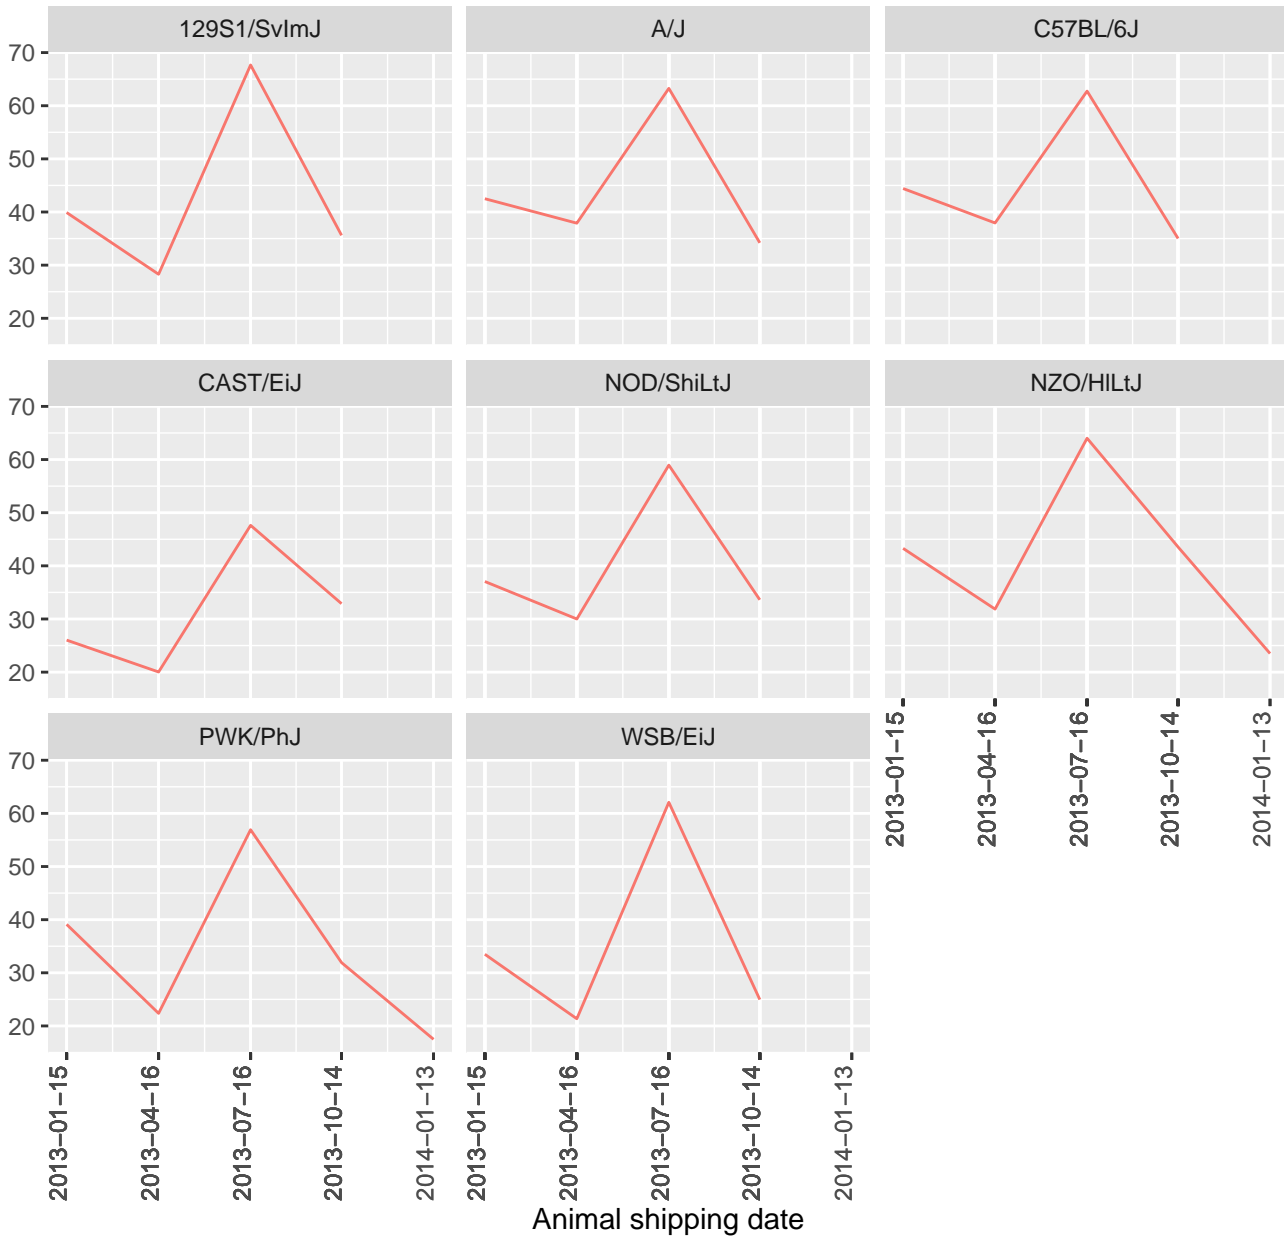

Procedure: GMC08  
Parameter: TEWL\_adj

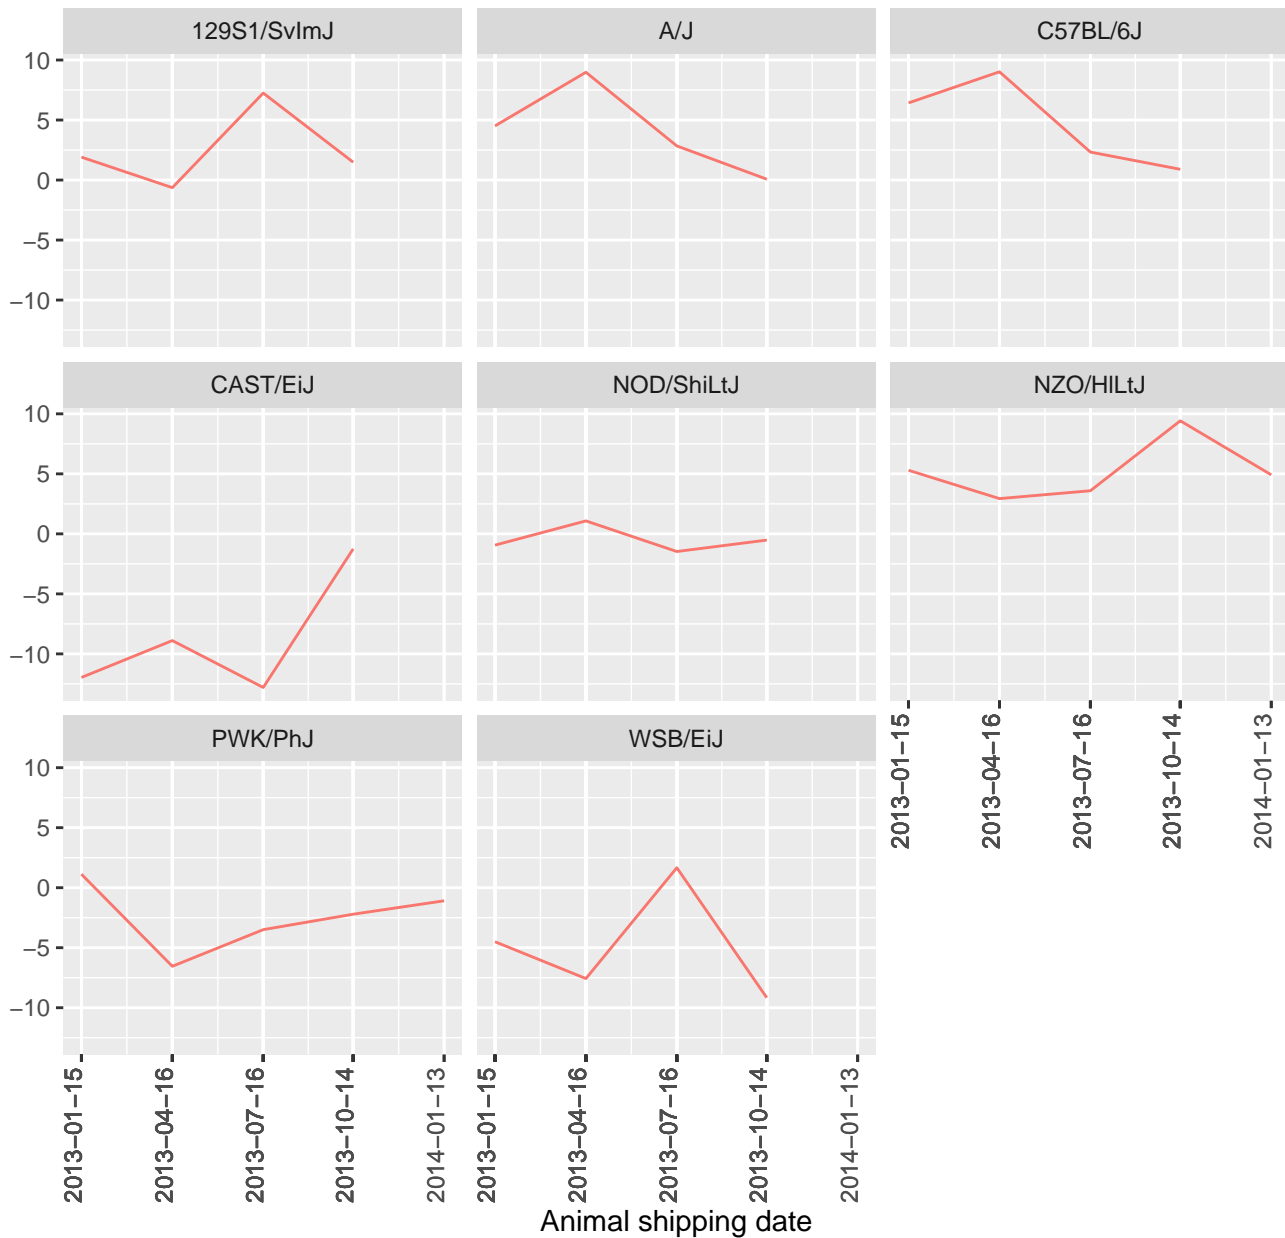

Procedure: GMC08

Parameter: TEWL\_ambient\_temp

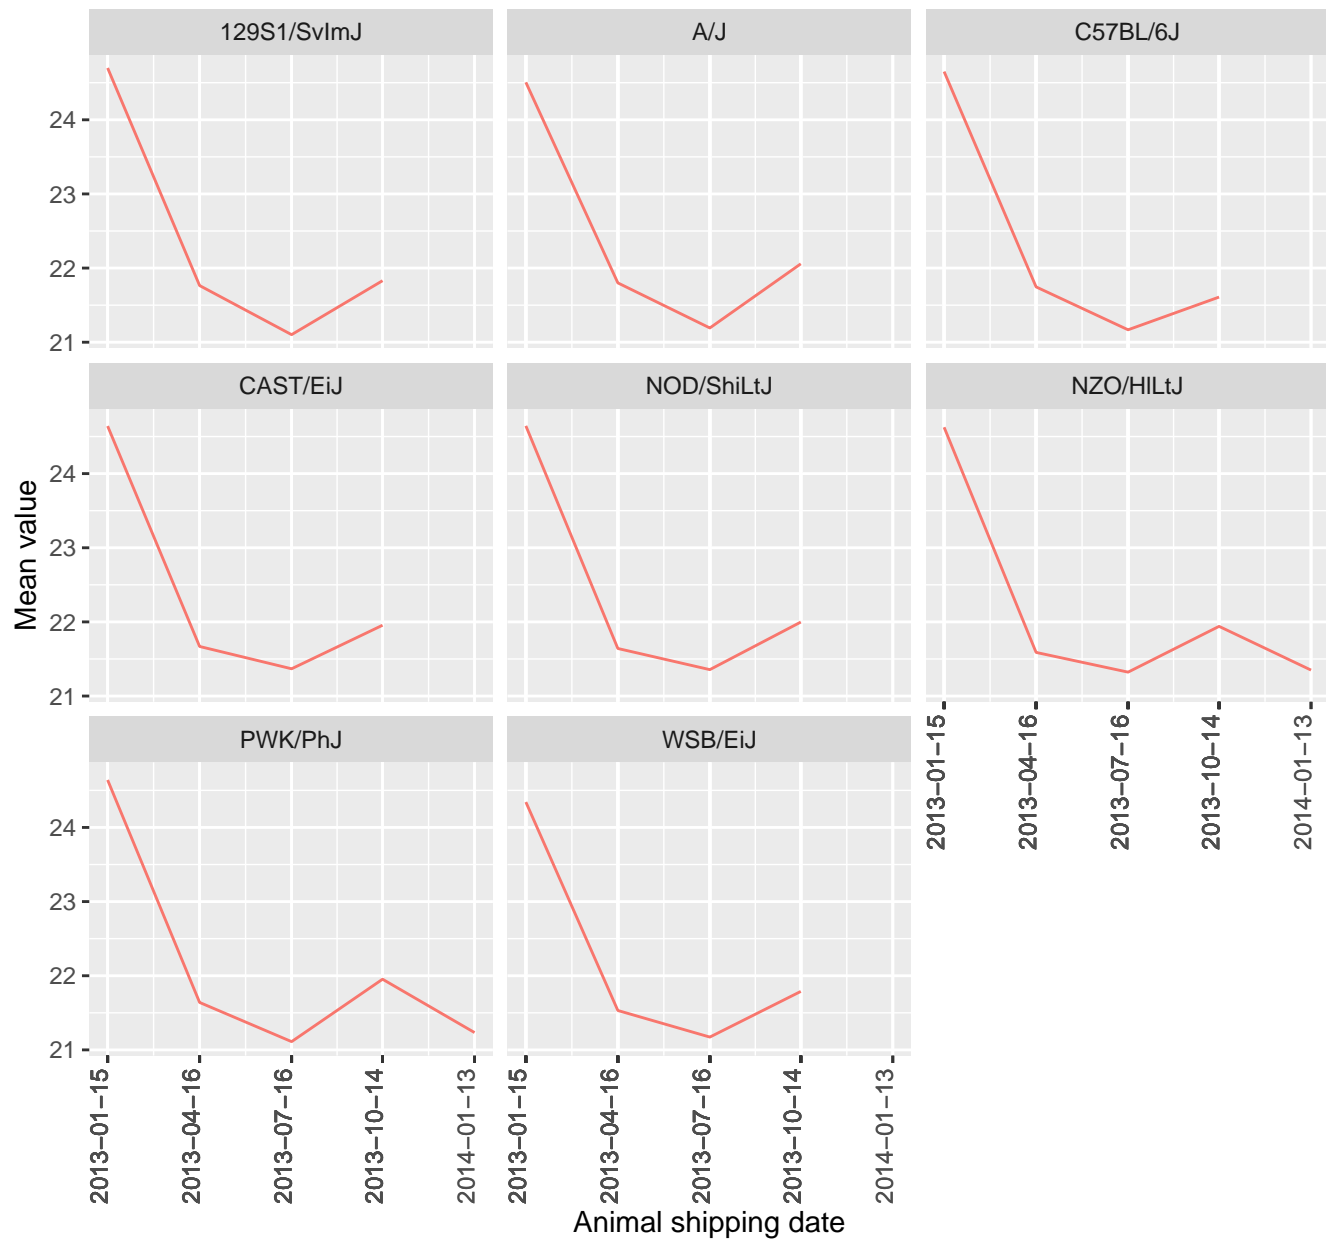

Procedure: GMC08  
Parameter: TEWL\_CV

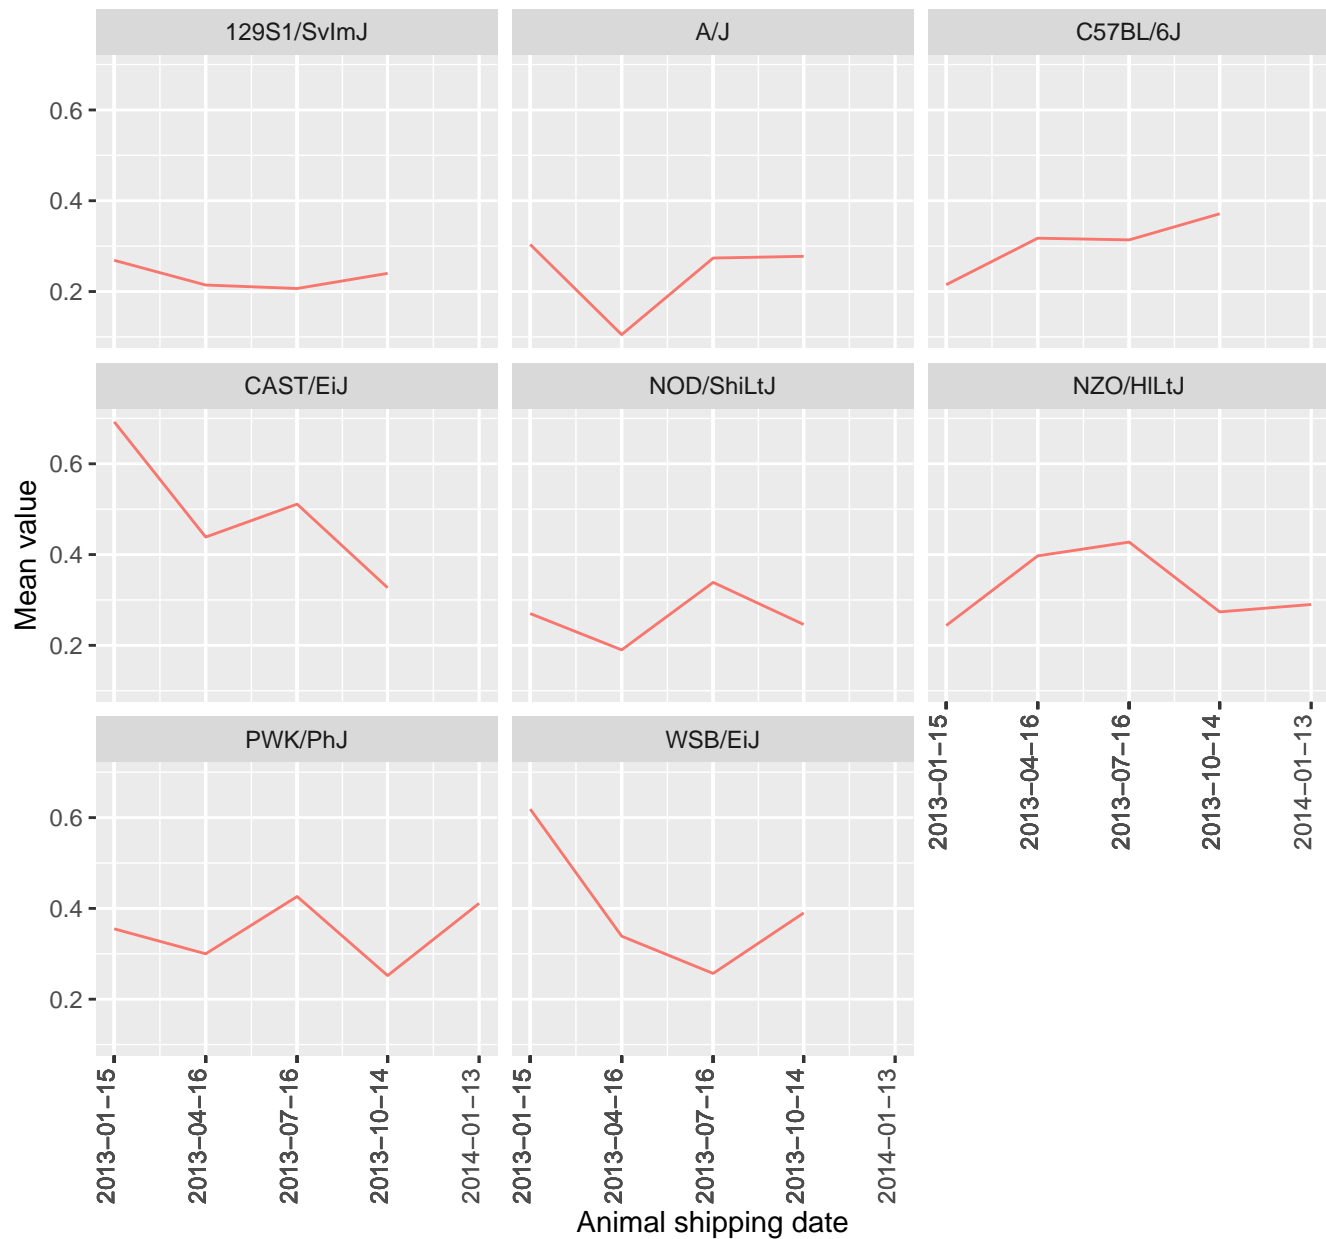



Procedure: GMC08

Parameter: TEWL\_daily\_mean

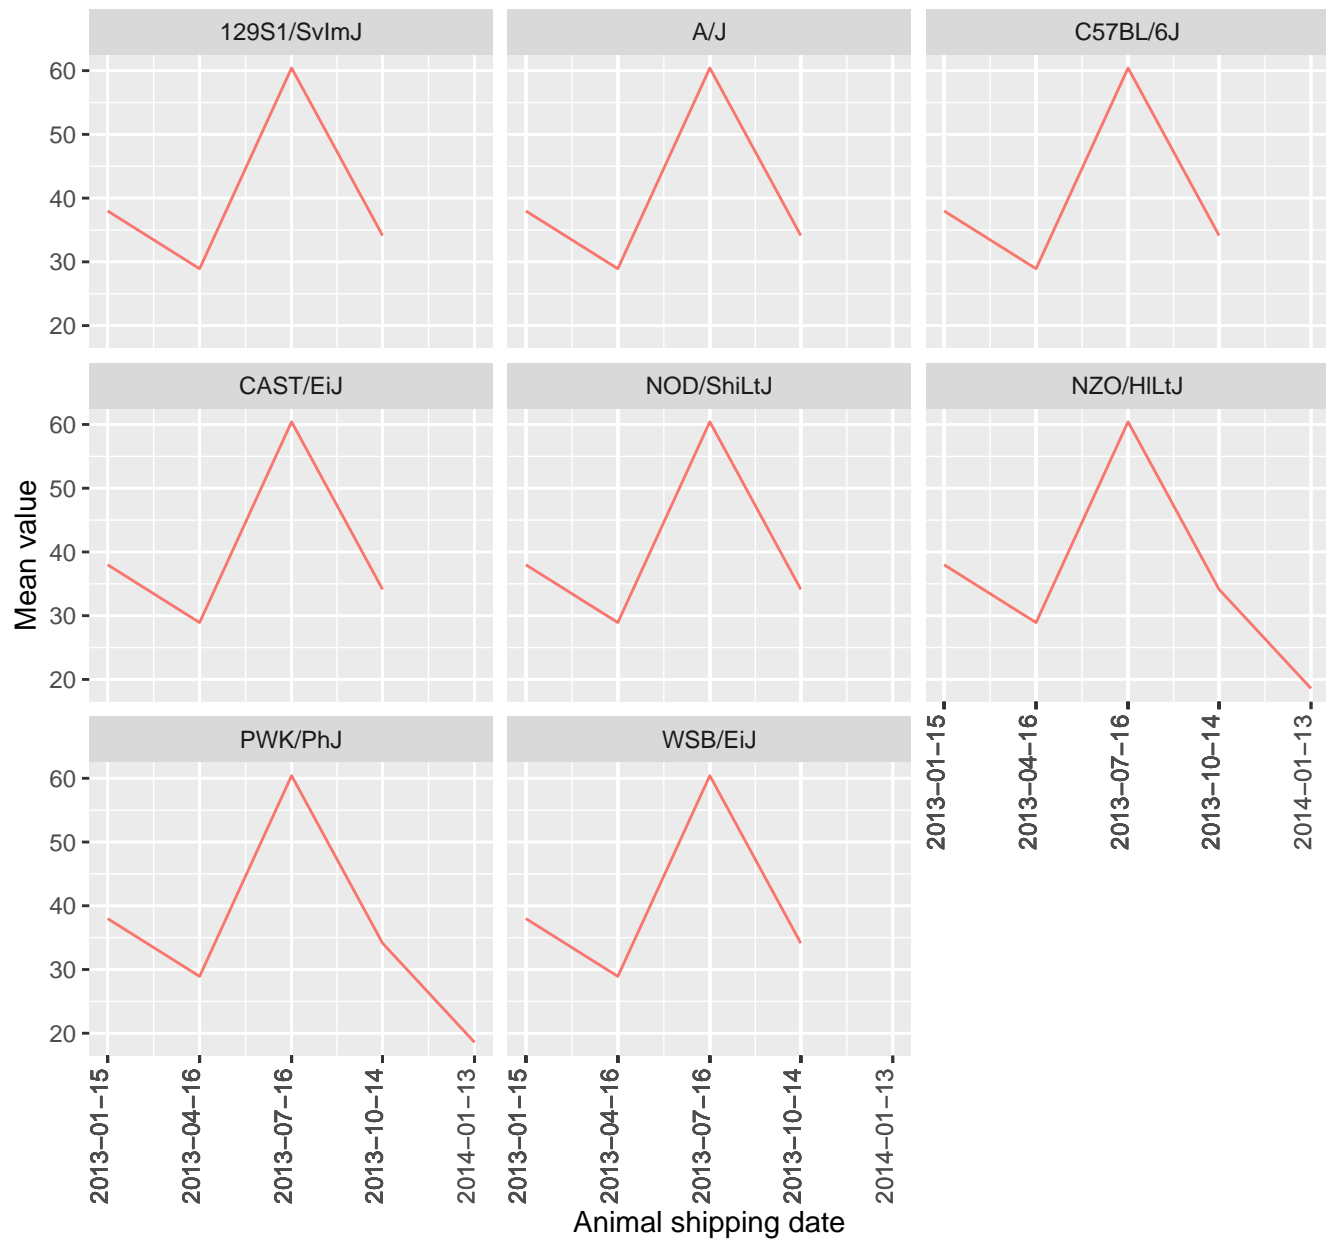

Procedure: GMC08

Parameter: TEWL\_rel\_humidity

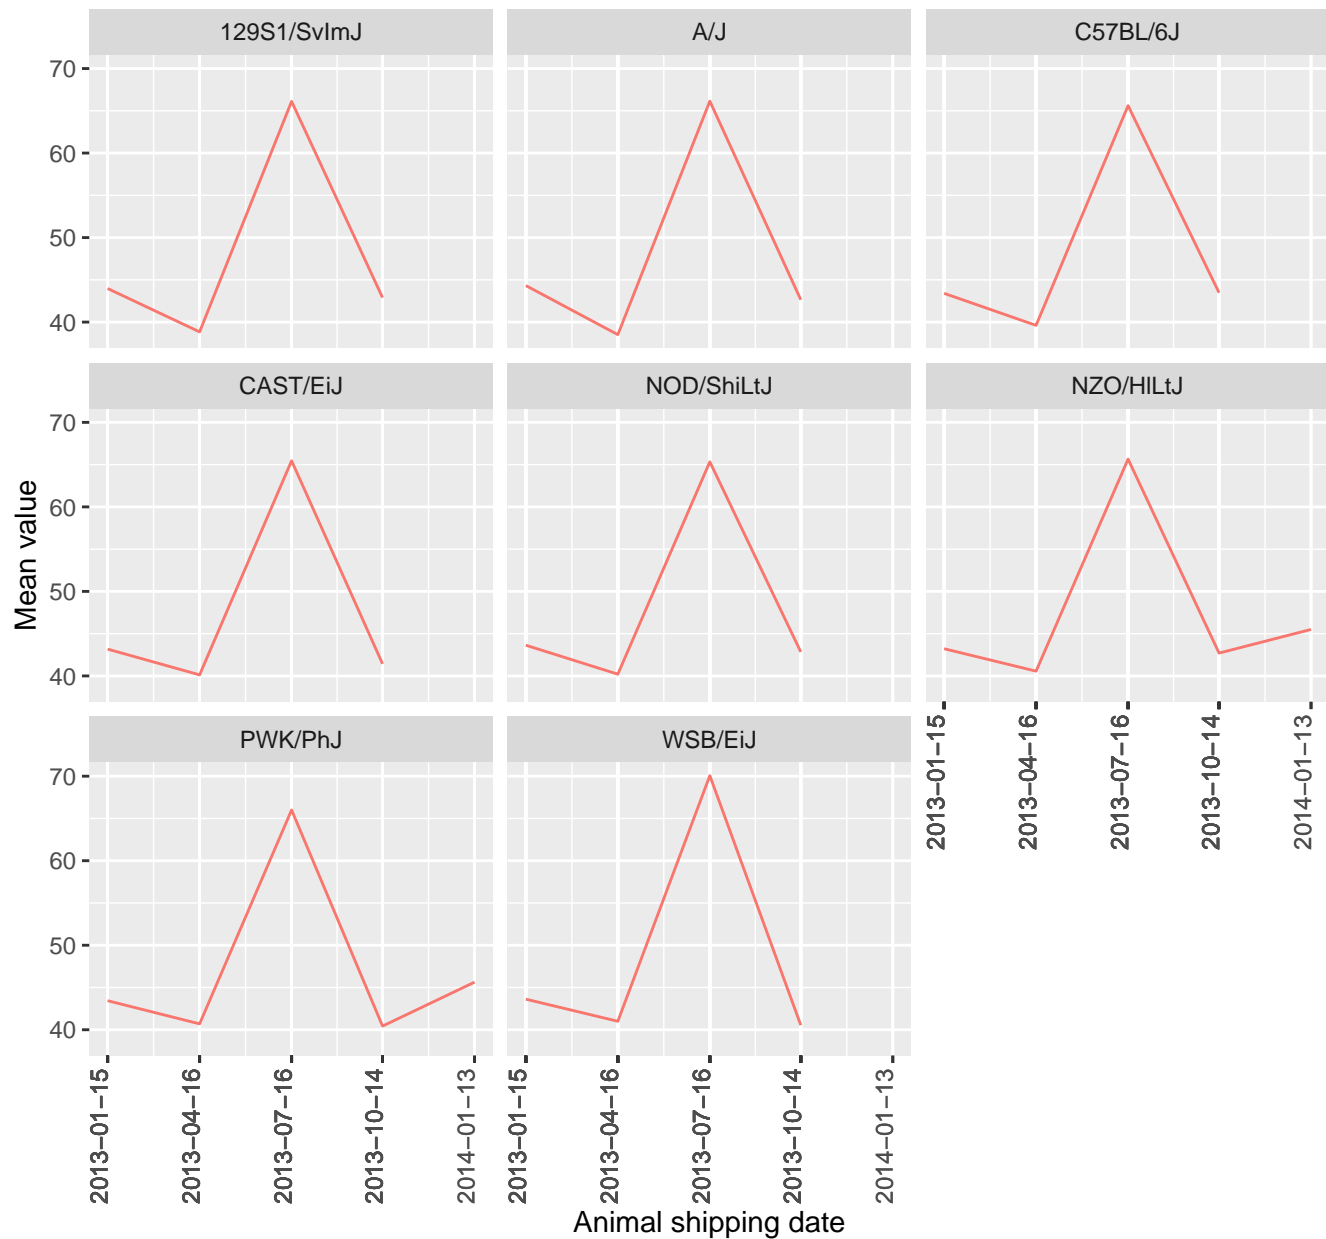

Procedure: GMC09  
Parameter: breaks\_X\_mean

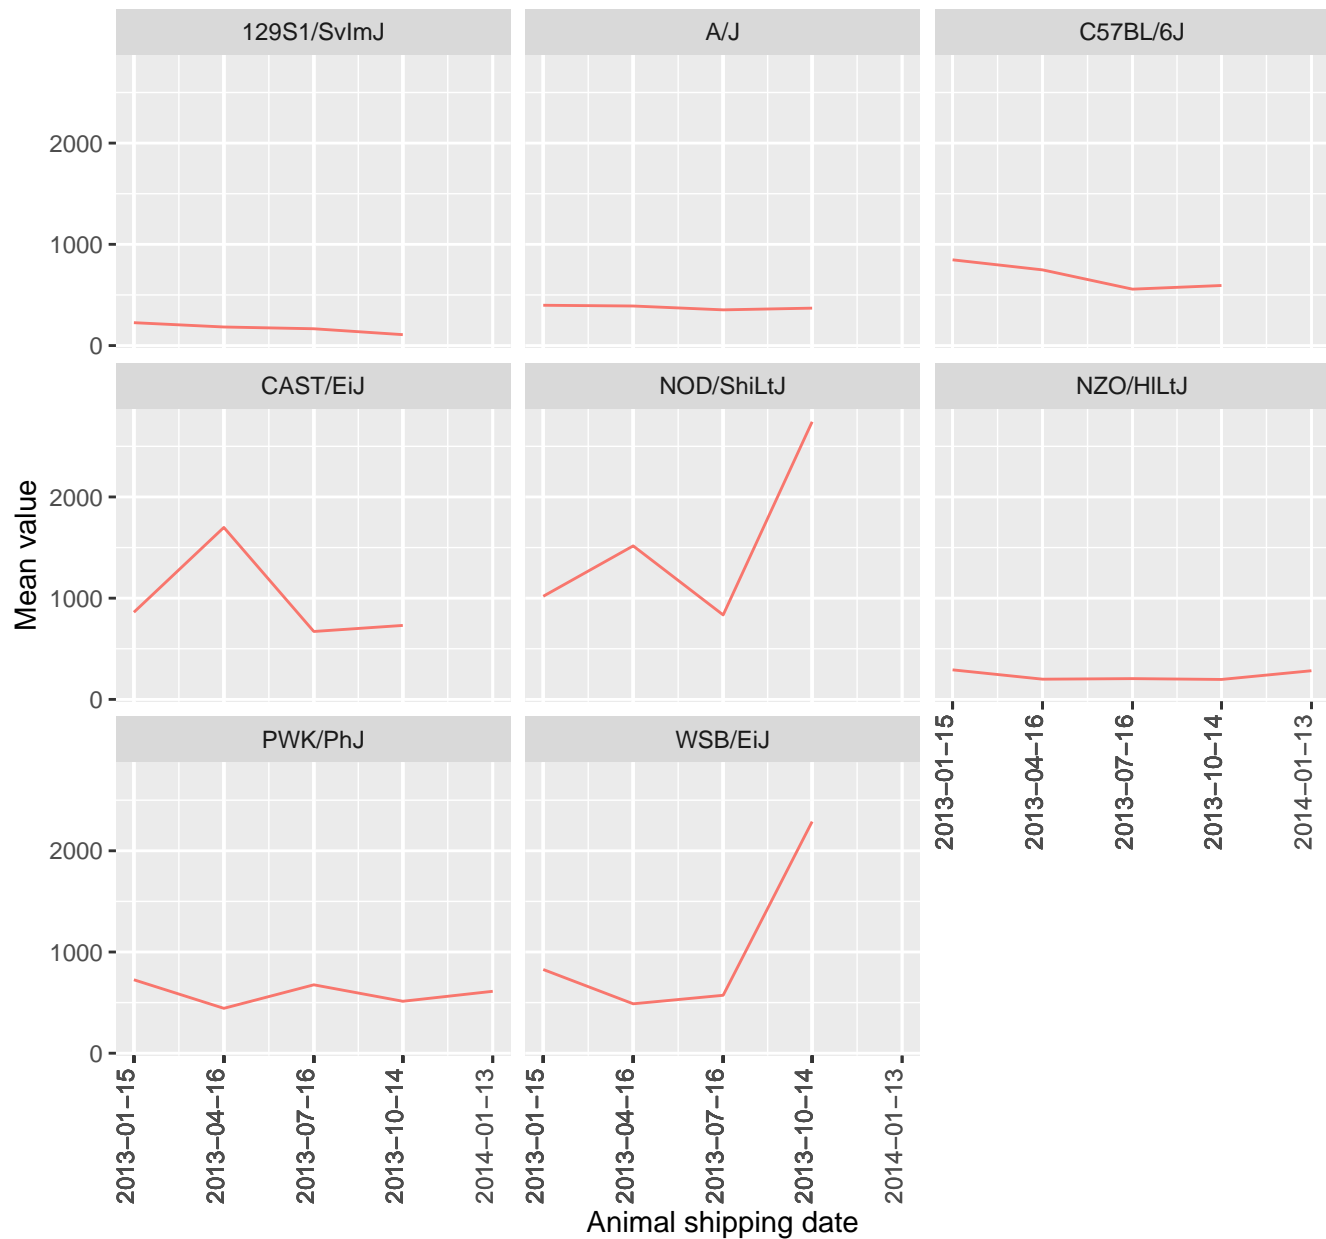

Procedure: GMC09

Parameter: breaks\_XA\_mean

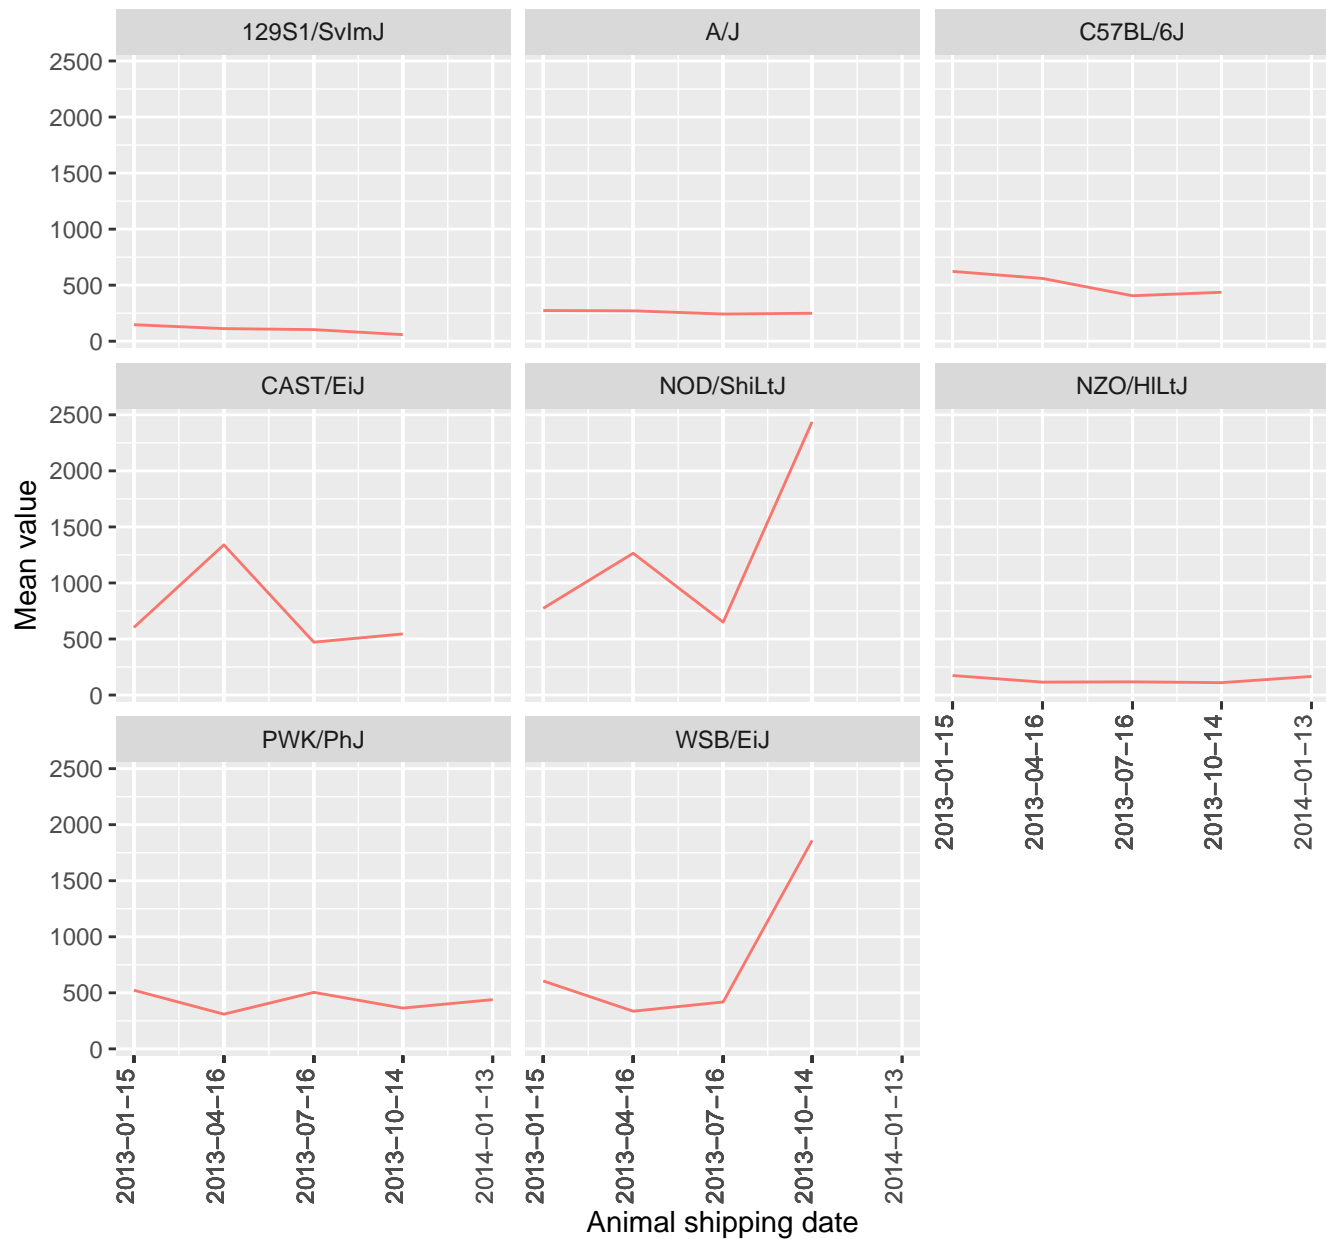

Procedure: GMC09  
Parameter: breaks\_XF\_mean

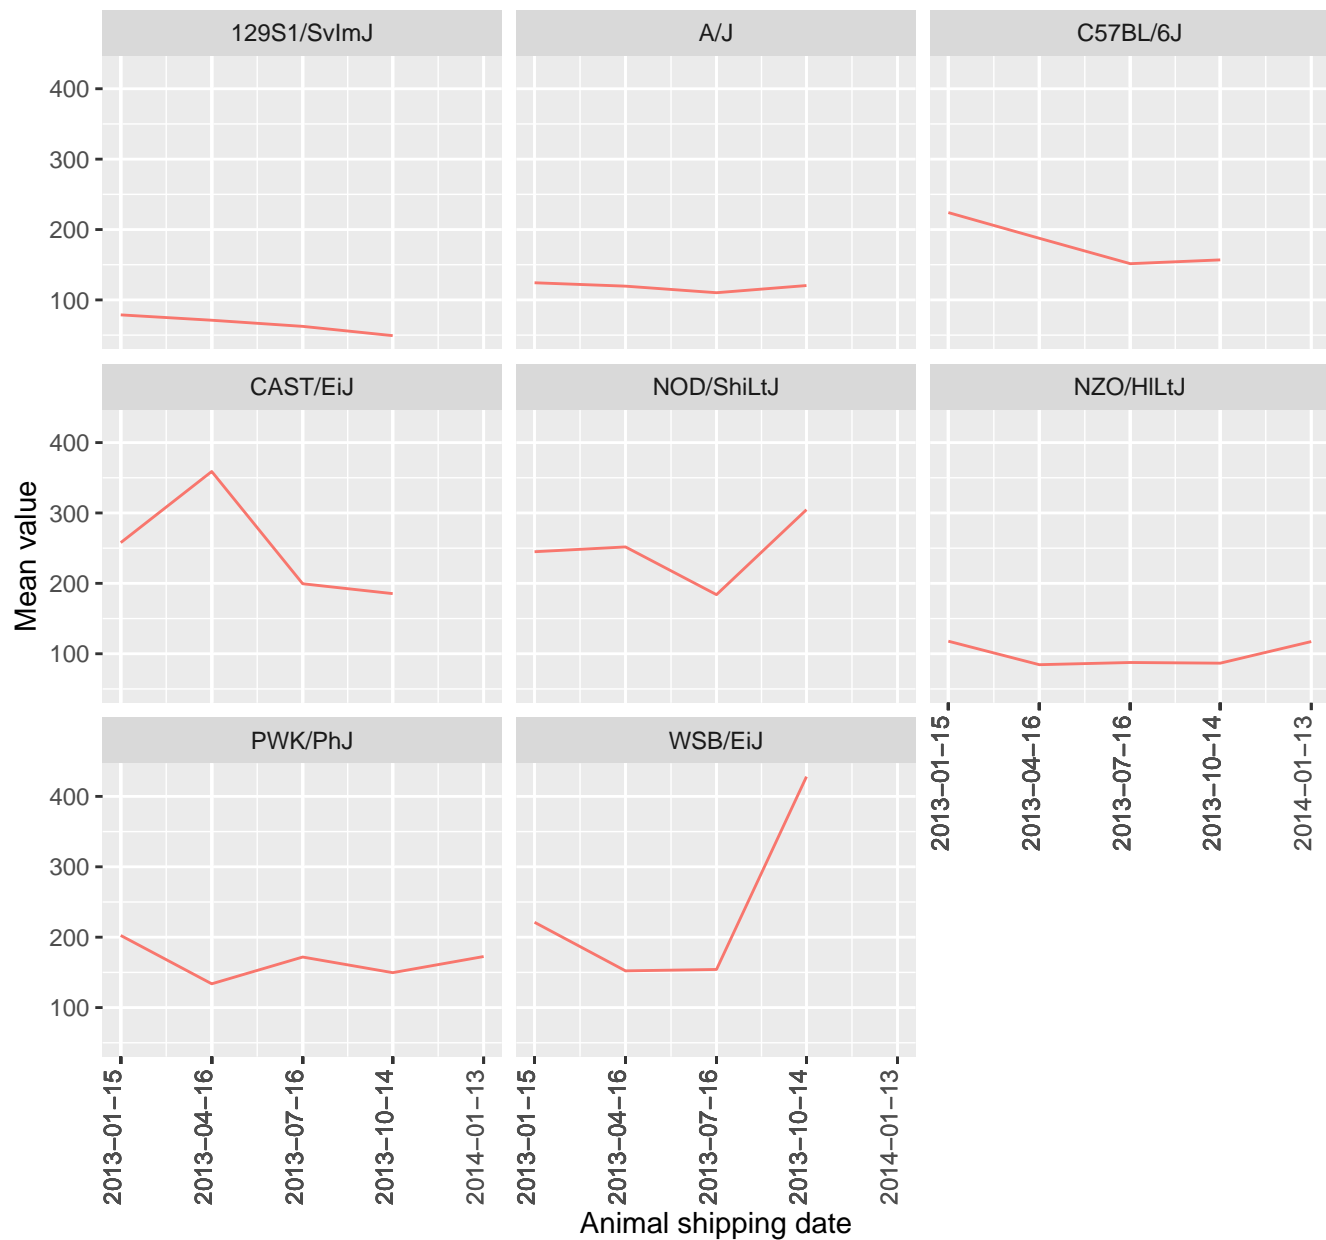

Procedure: GMC09

Parameter: breaks\_YA\_mean

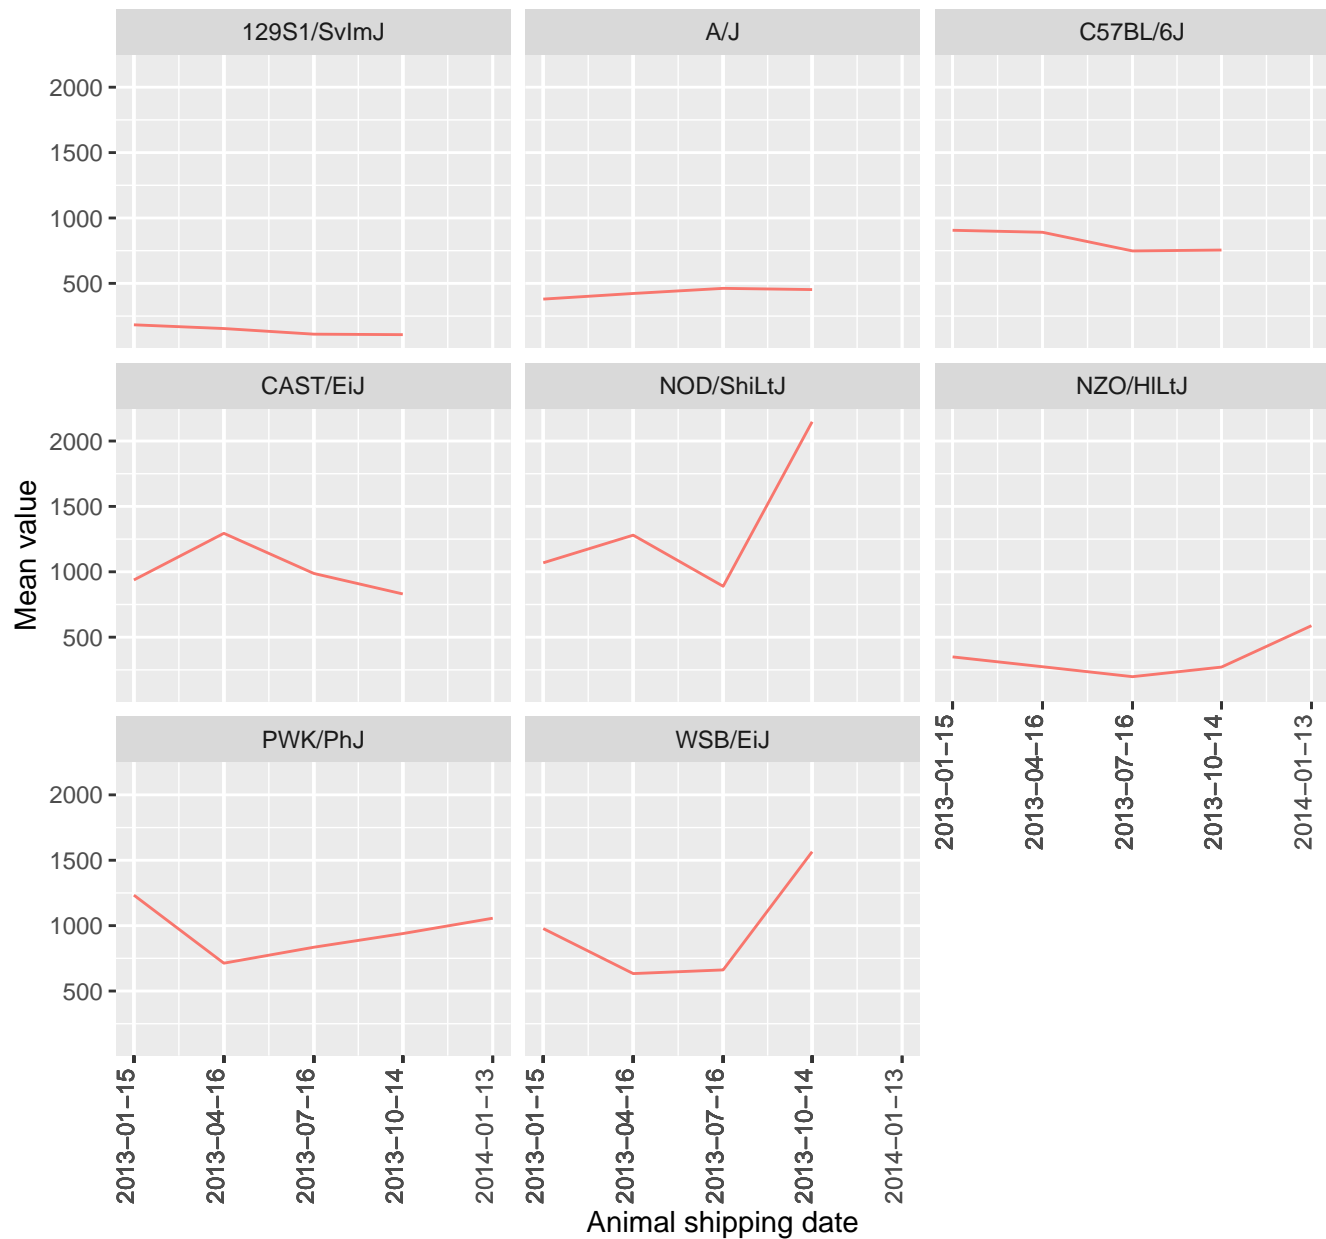

Procedure: GMC09  
Parameter: breaks\_YF\_mean

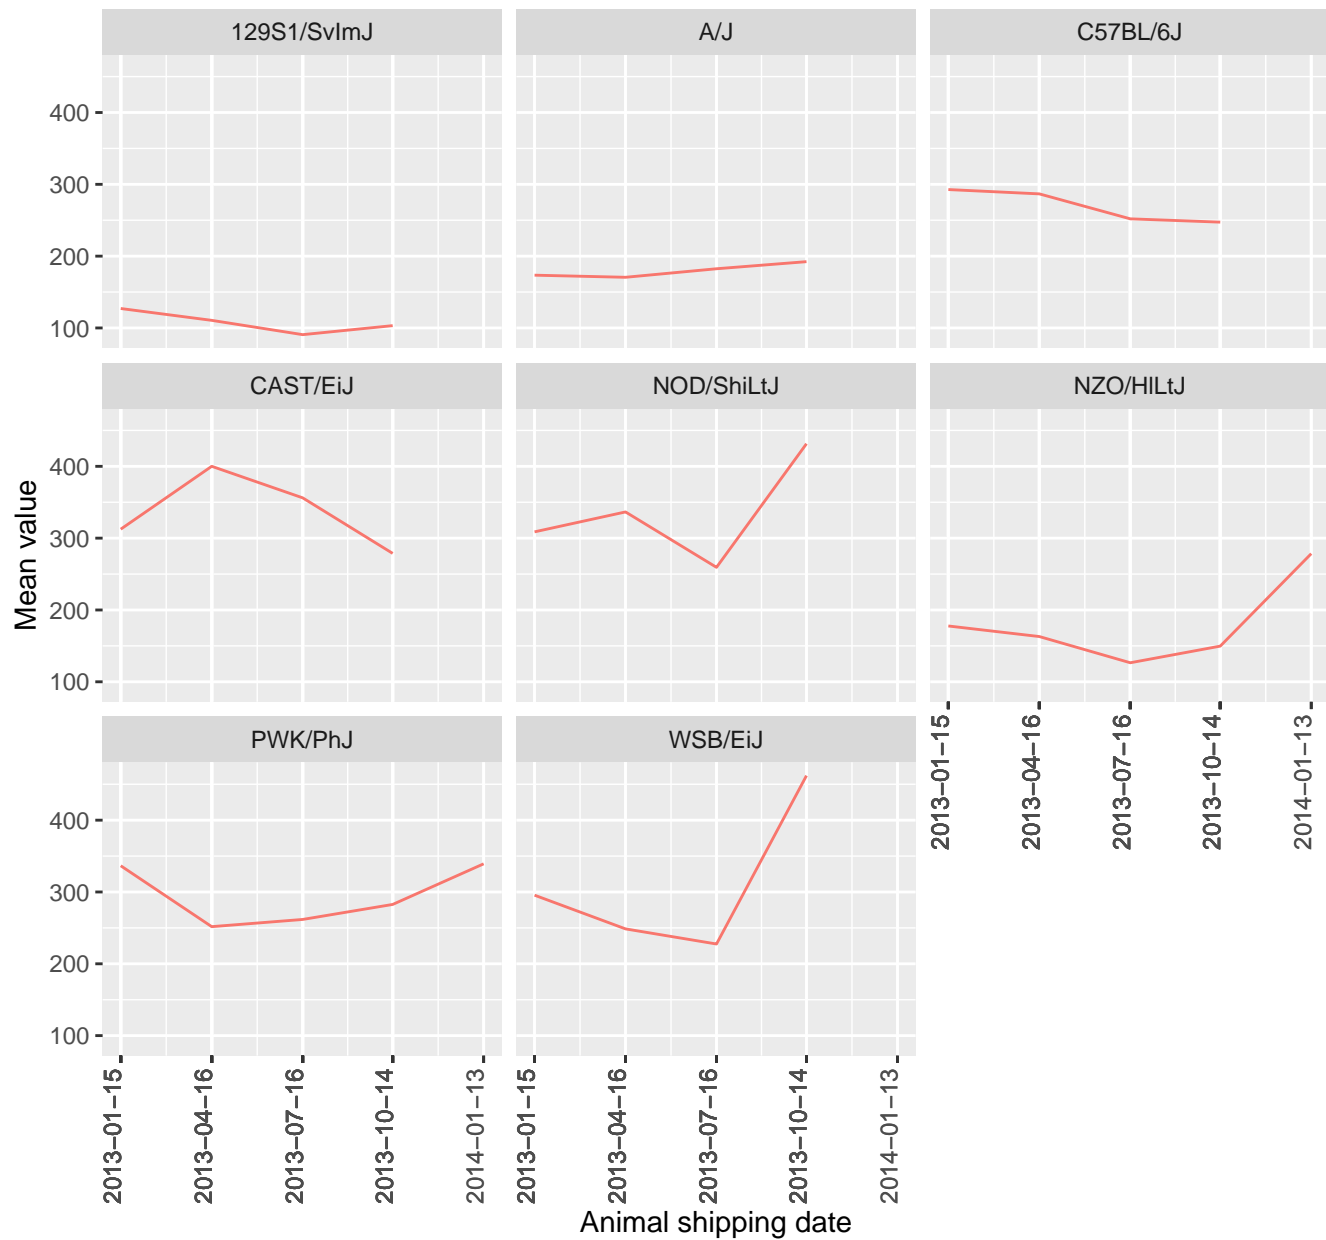

Procedure: GMC09  
Parameter: breaks\_Z\_mean

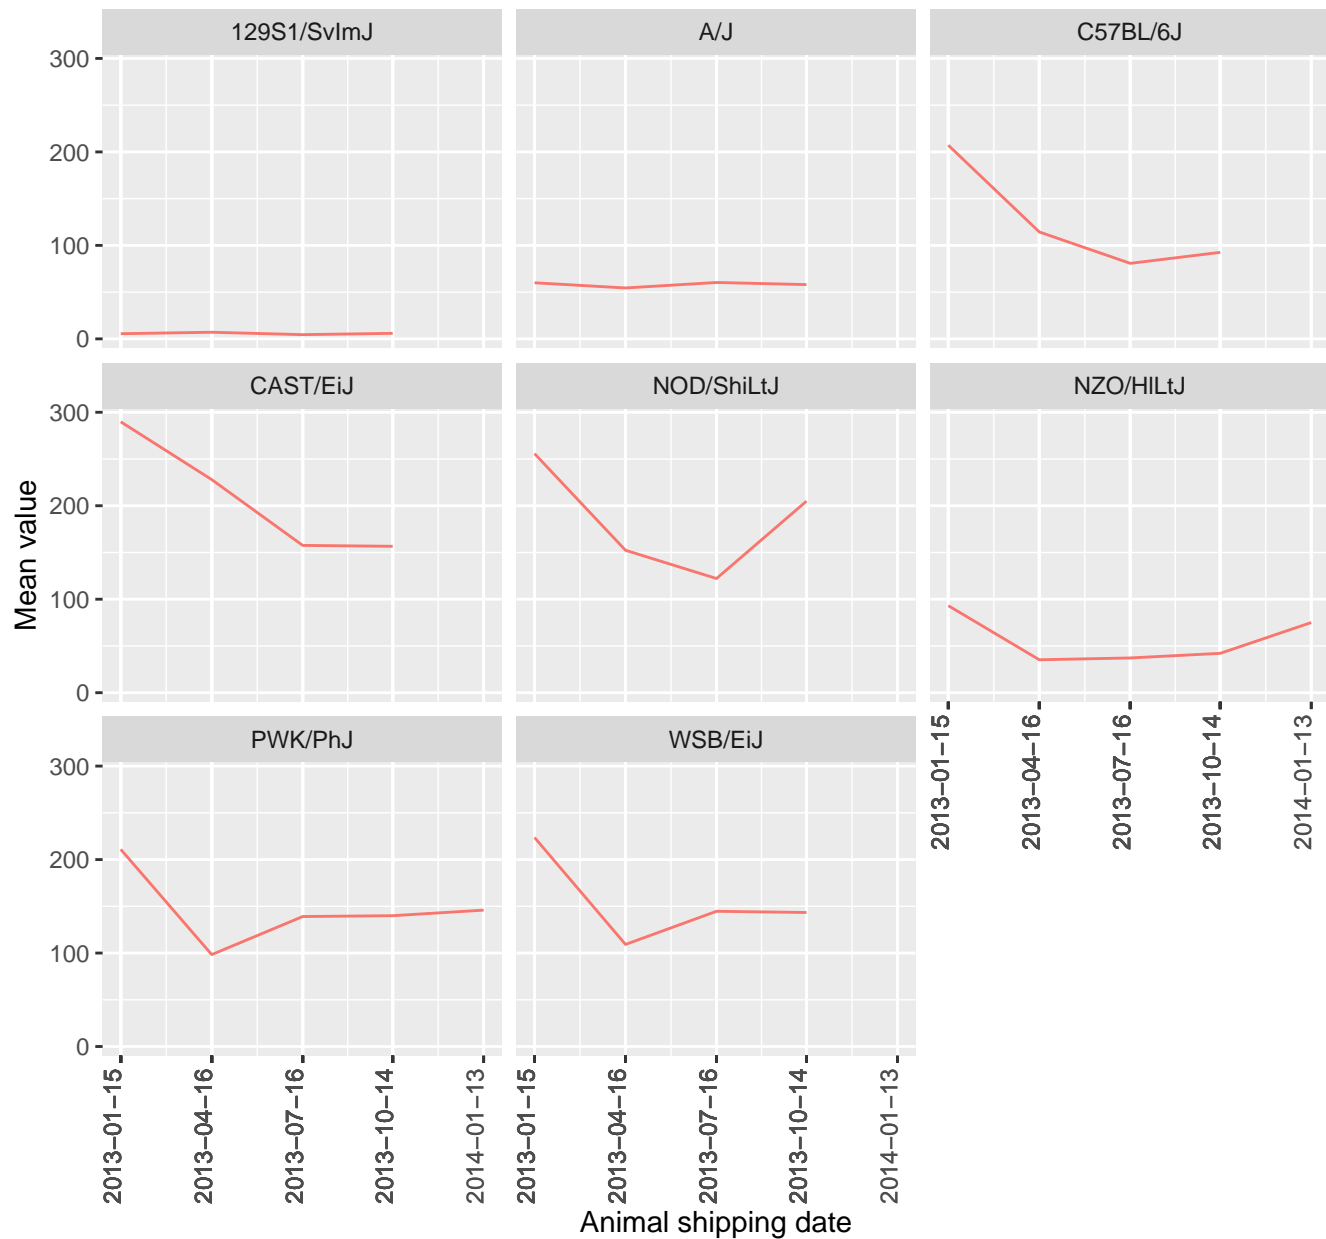



Procedure: GMC09  
Parameter: bw\_after

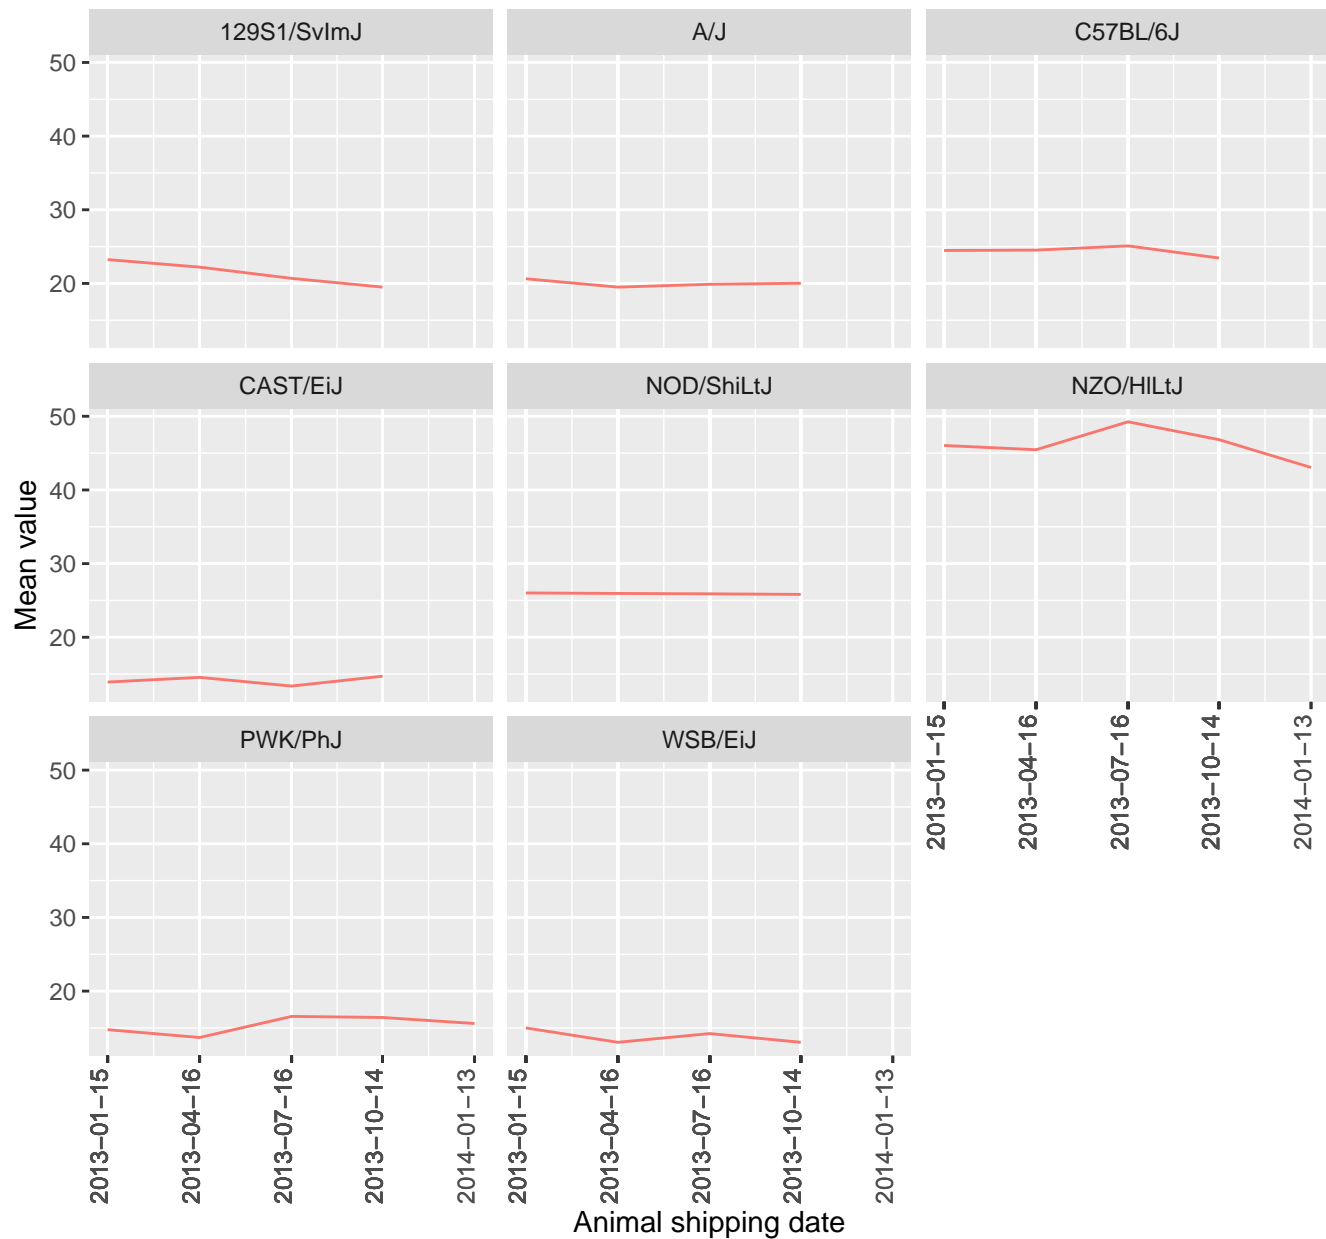

Procedure: GMC09  
Parameter: distance\_mean

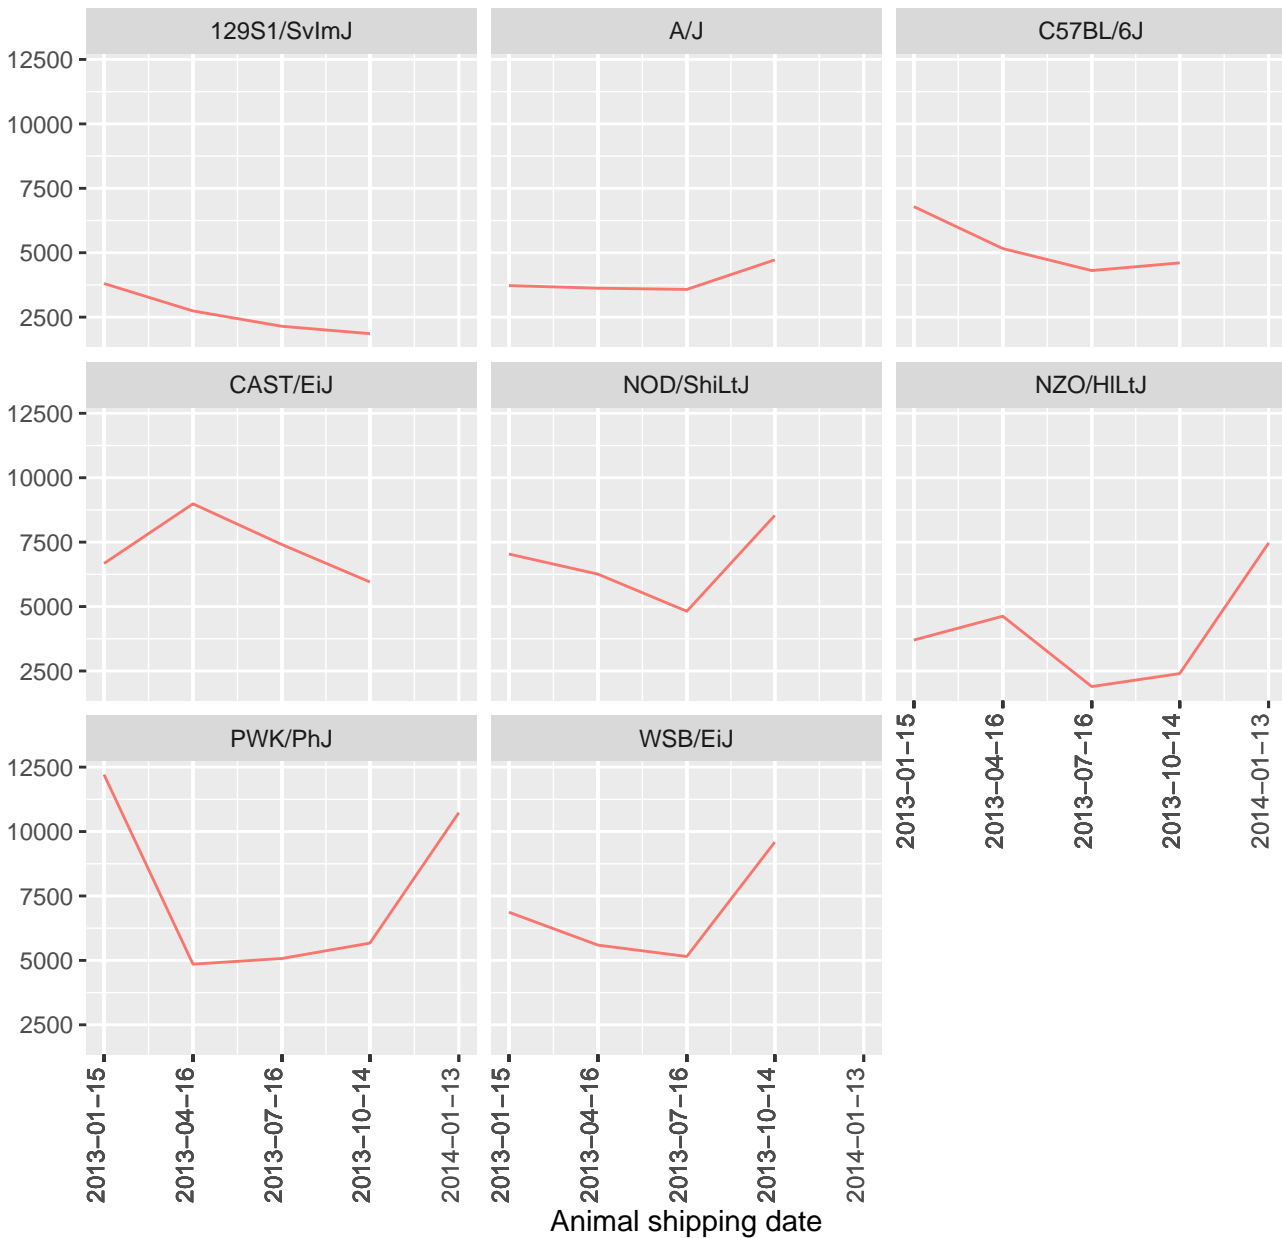

Procedure: GMC09

Parameter: food

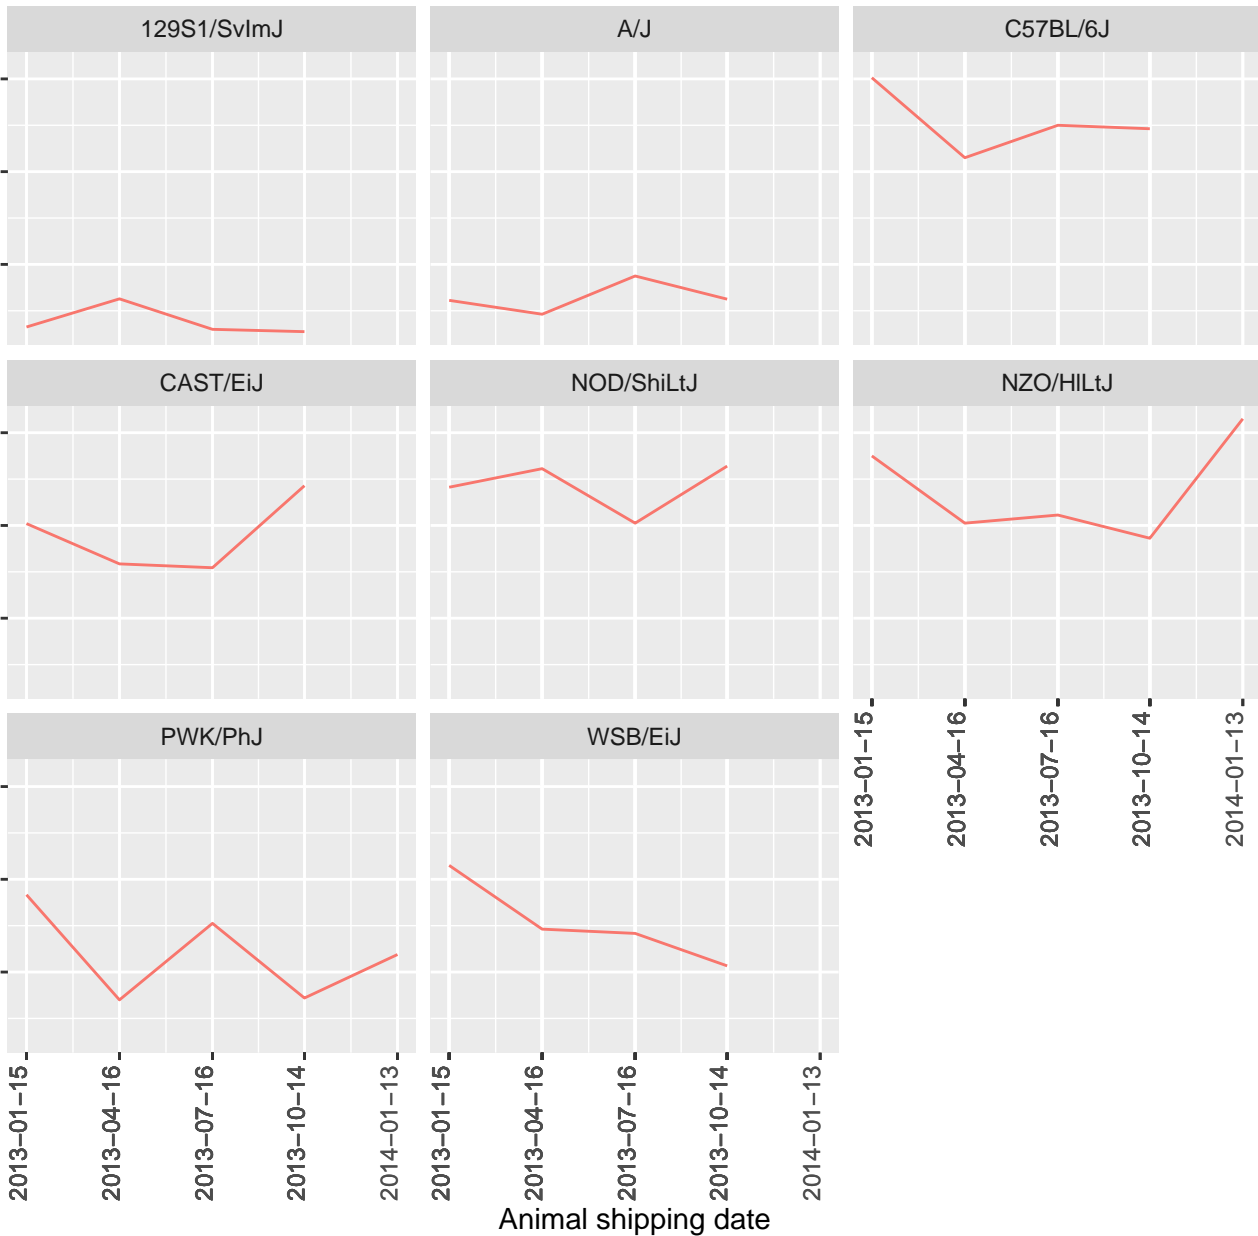

Procedure: GMC09  
Parameter: heat\_mean

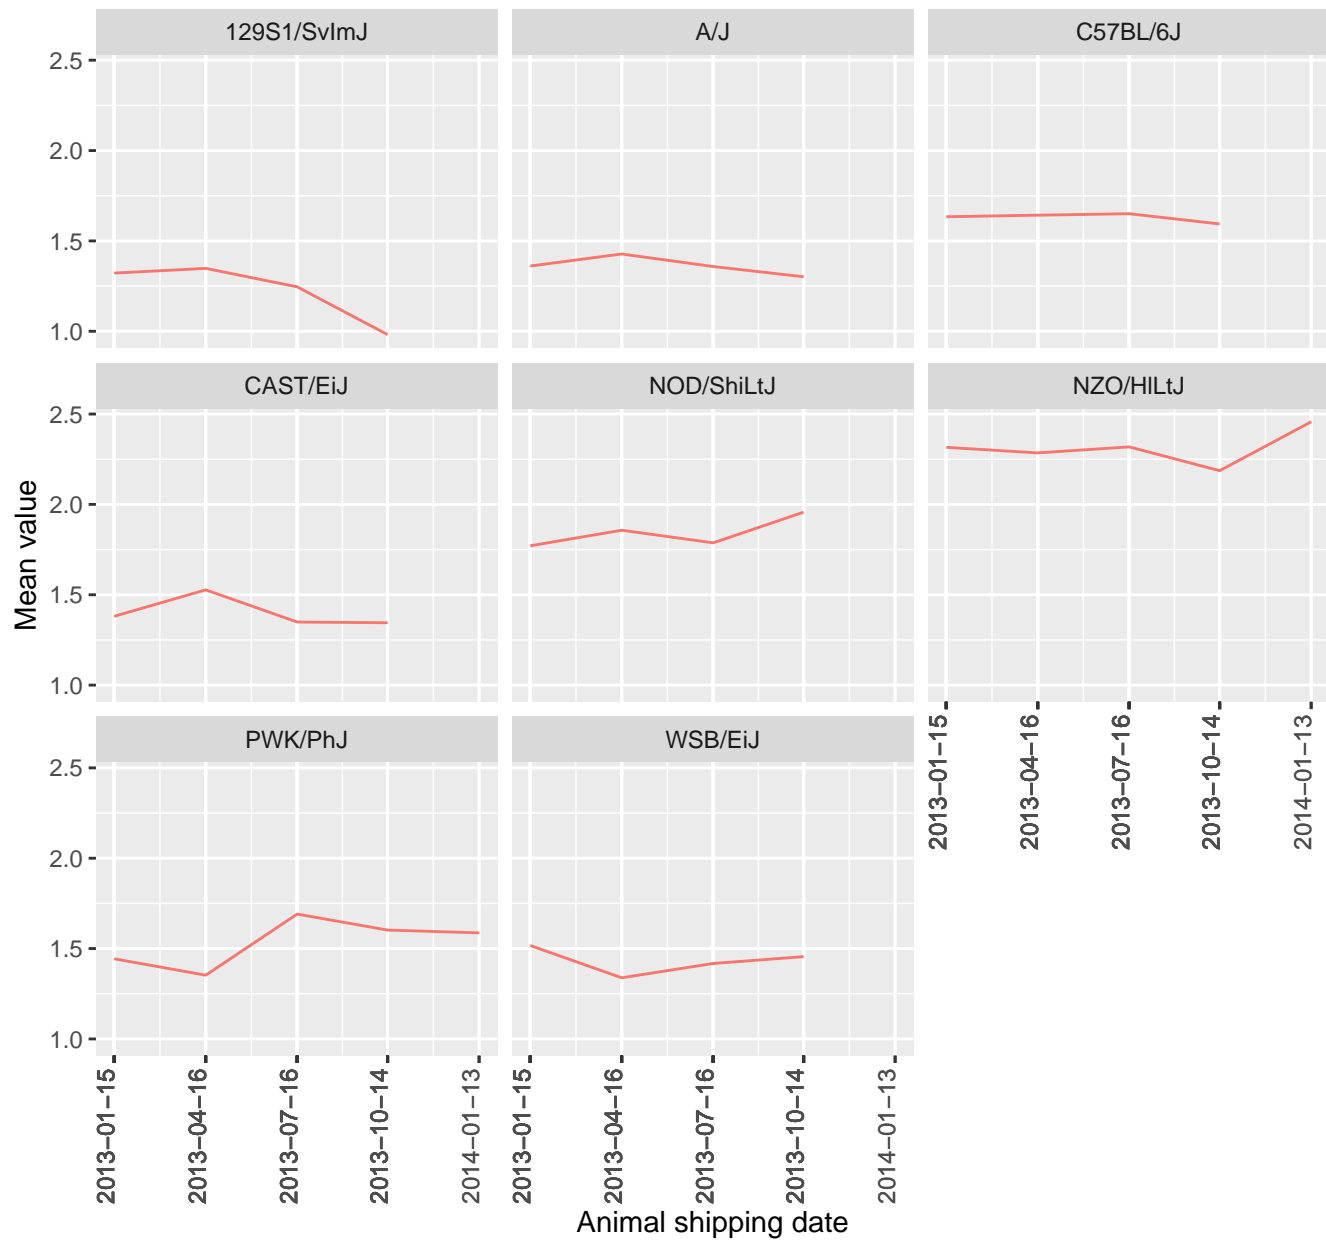

Procedure: GMC09  
Parameter: RER\_mean

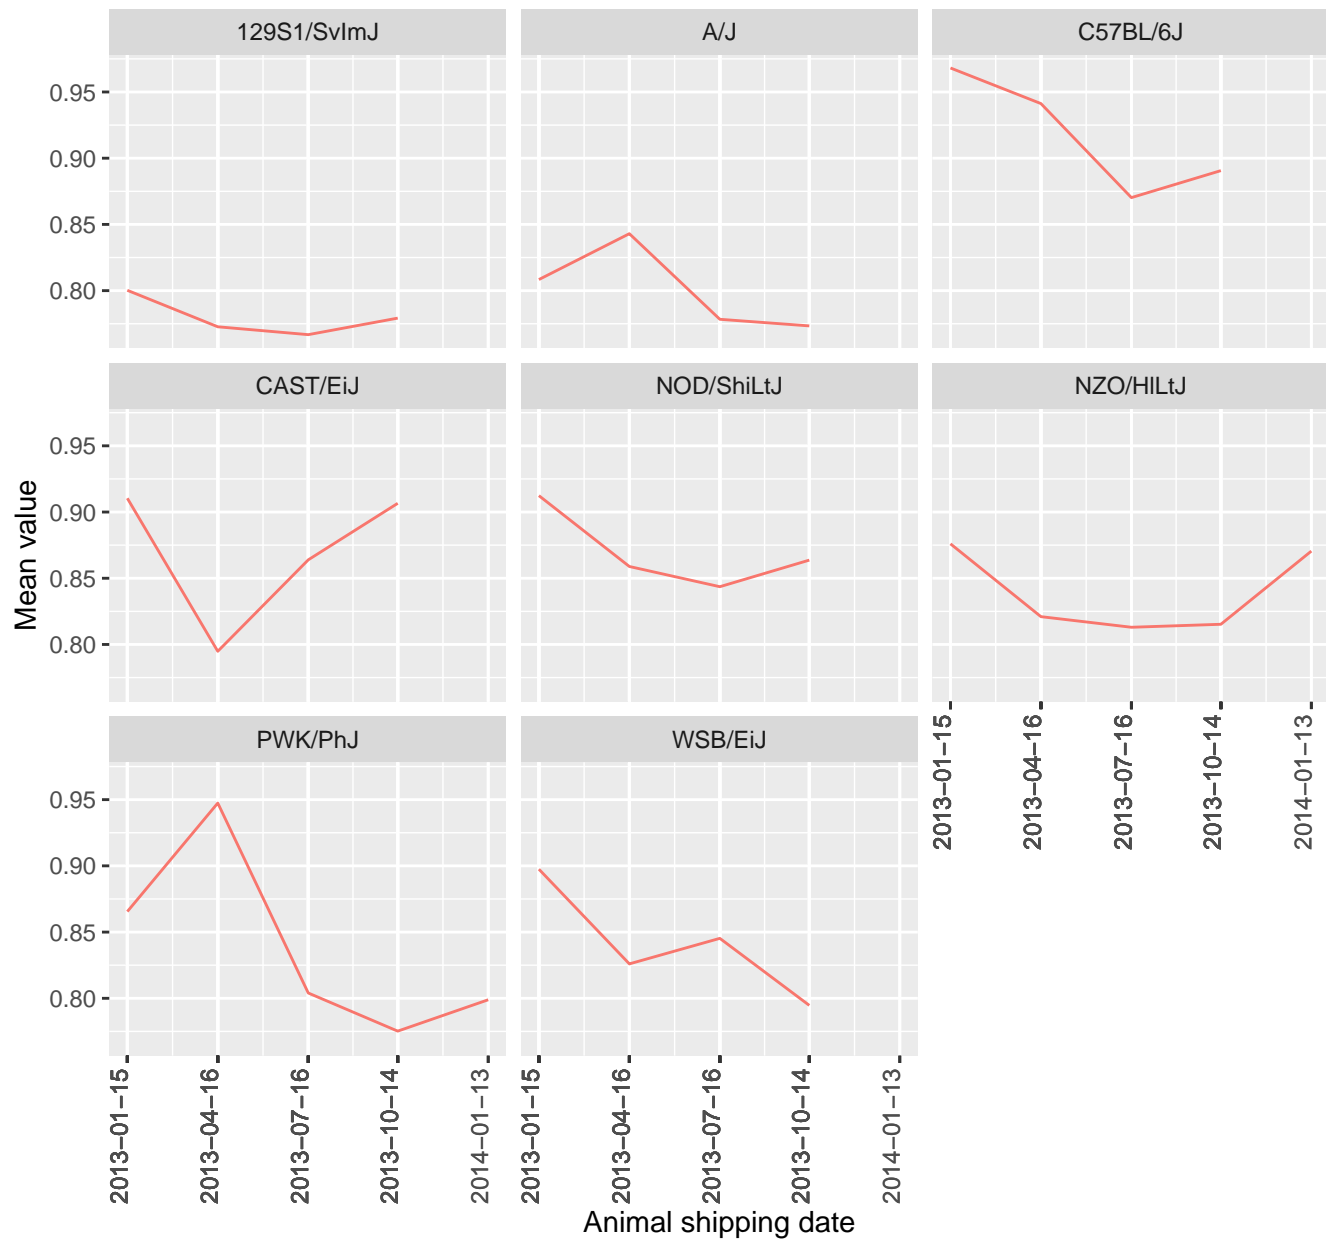

Procedure: GMC09  
Parameter: speed\_mean

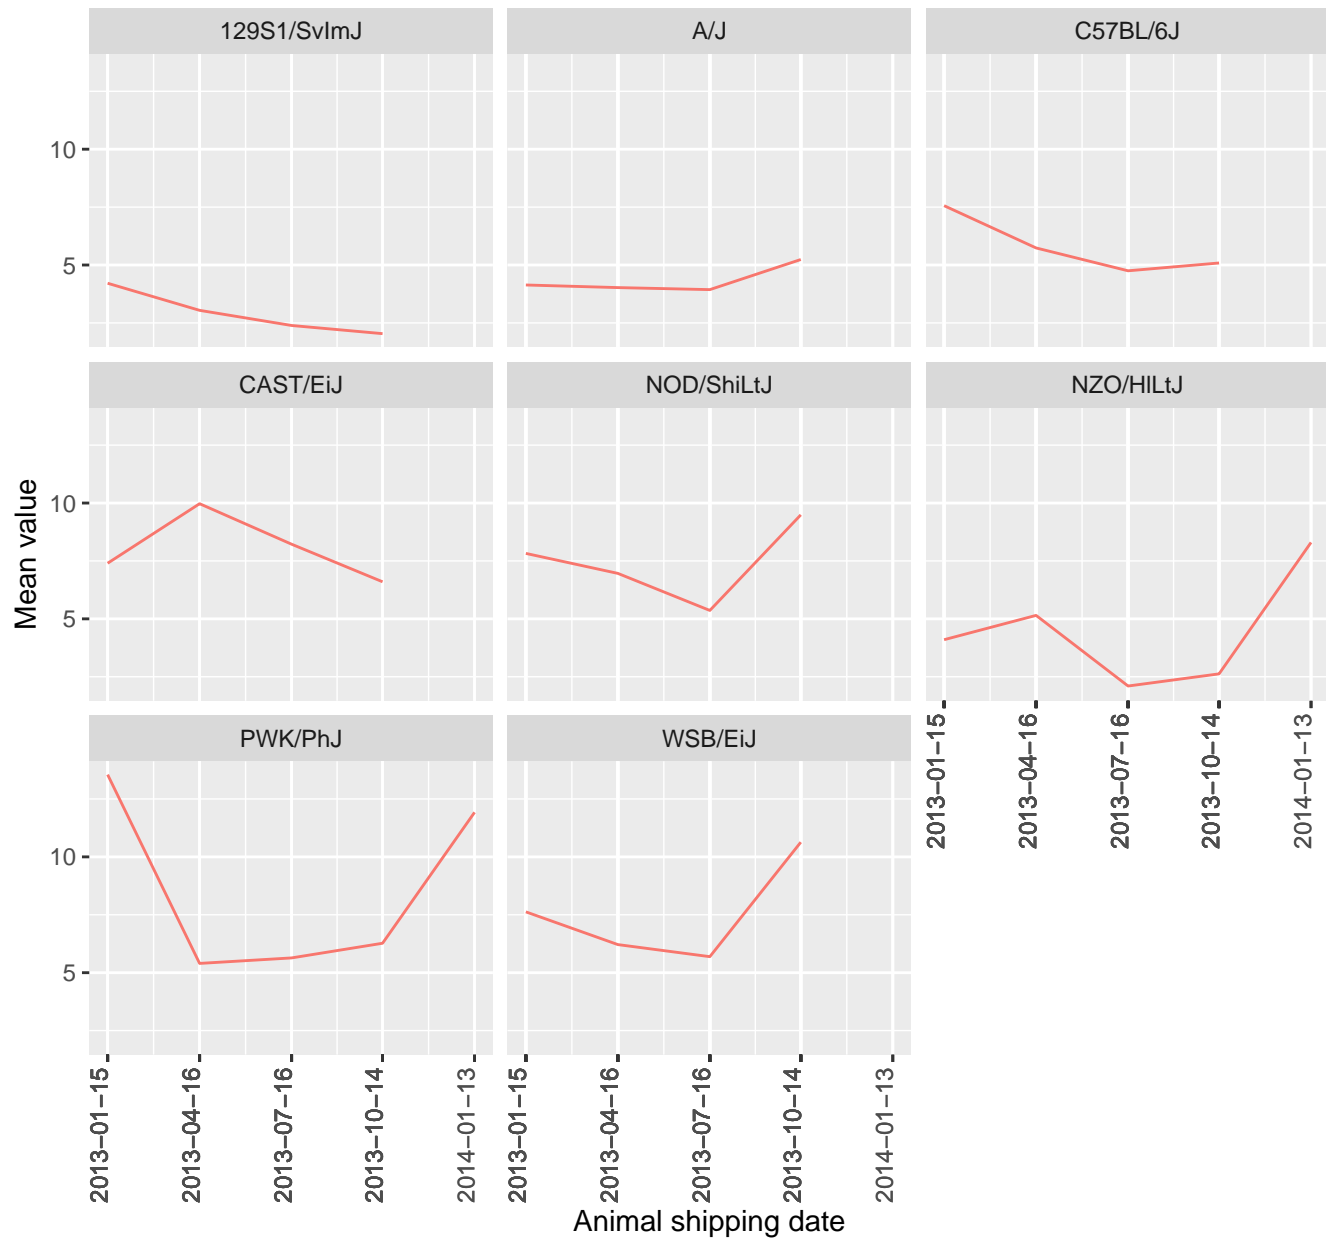

Procedure: GMC09  
Parameter: VCO2\_mean

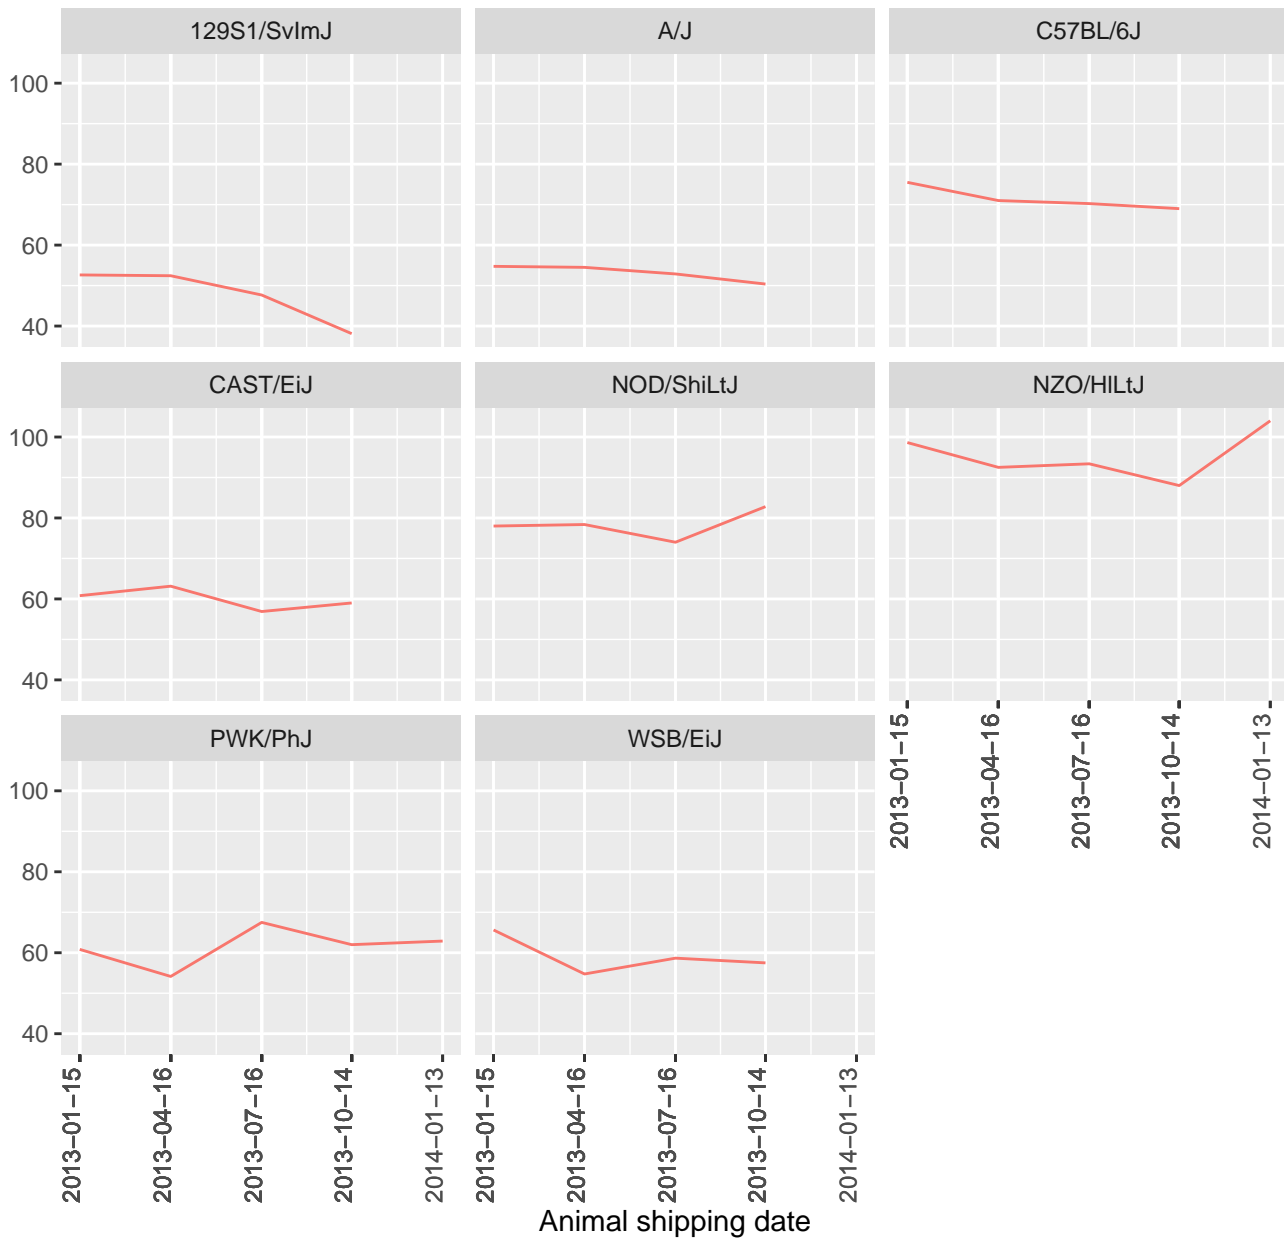

Procedure: GMC09  
Parameter: VO2\_mean

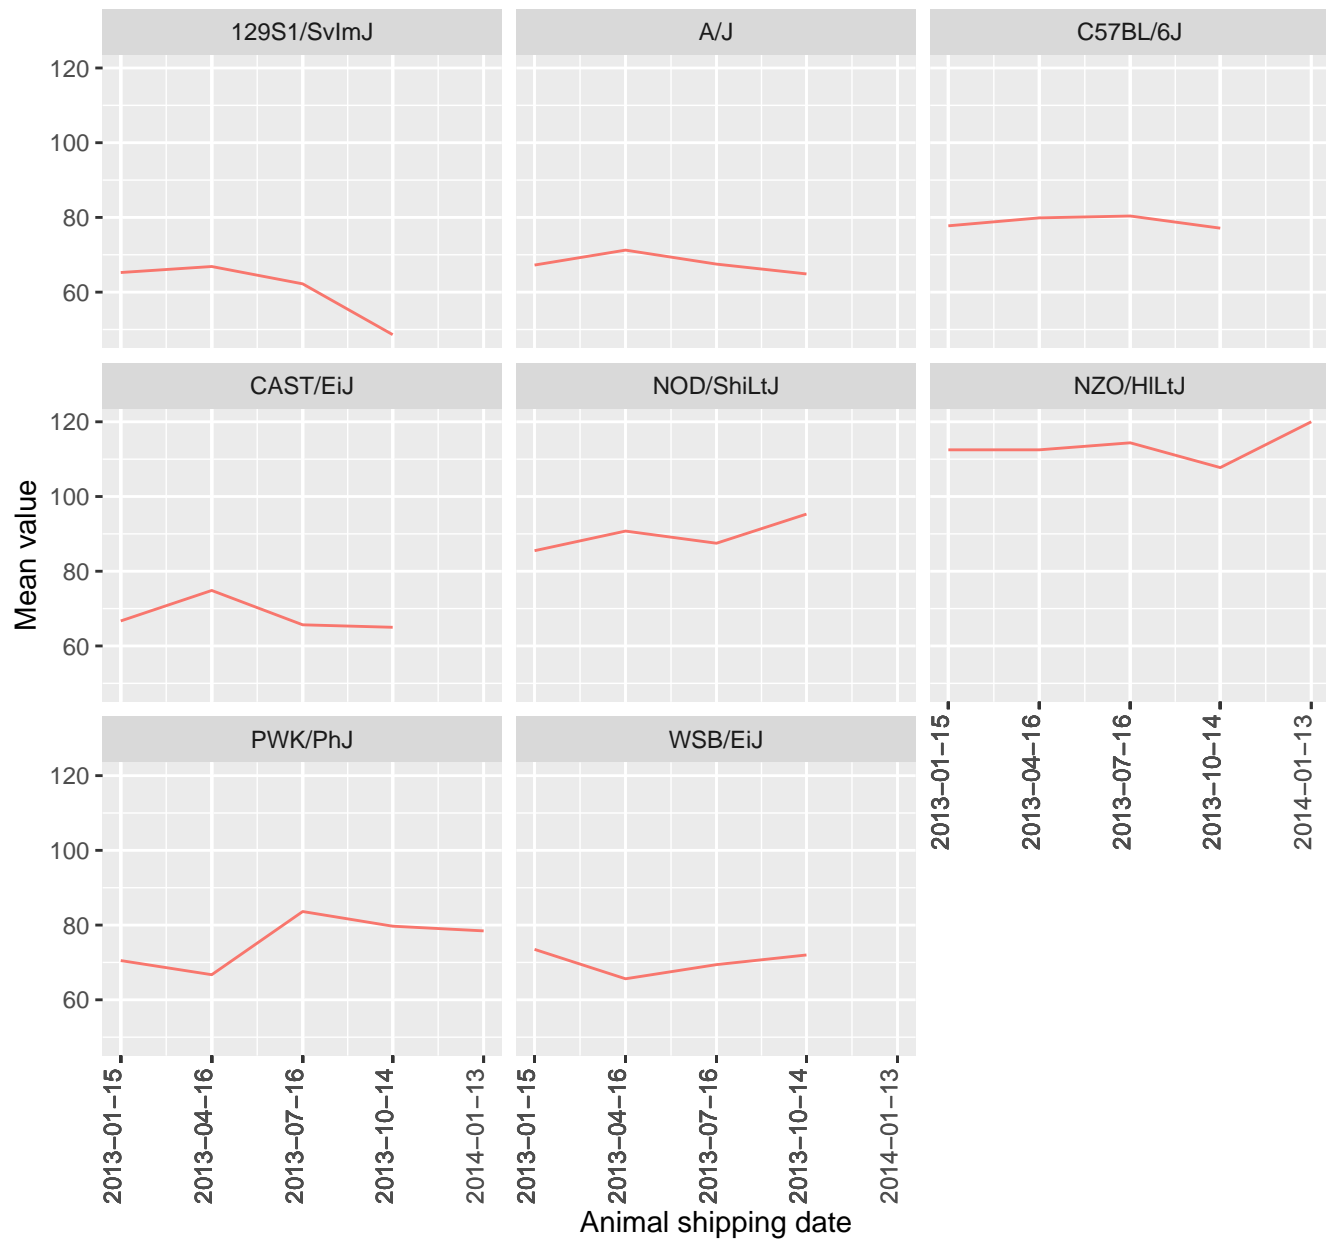



Procedure: GMC09

Parameter: water

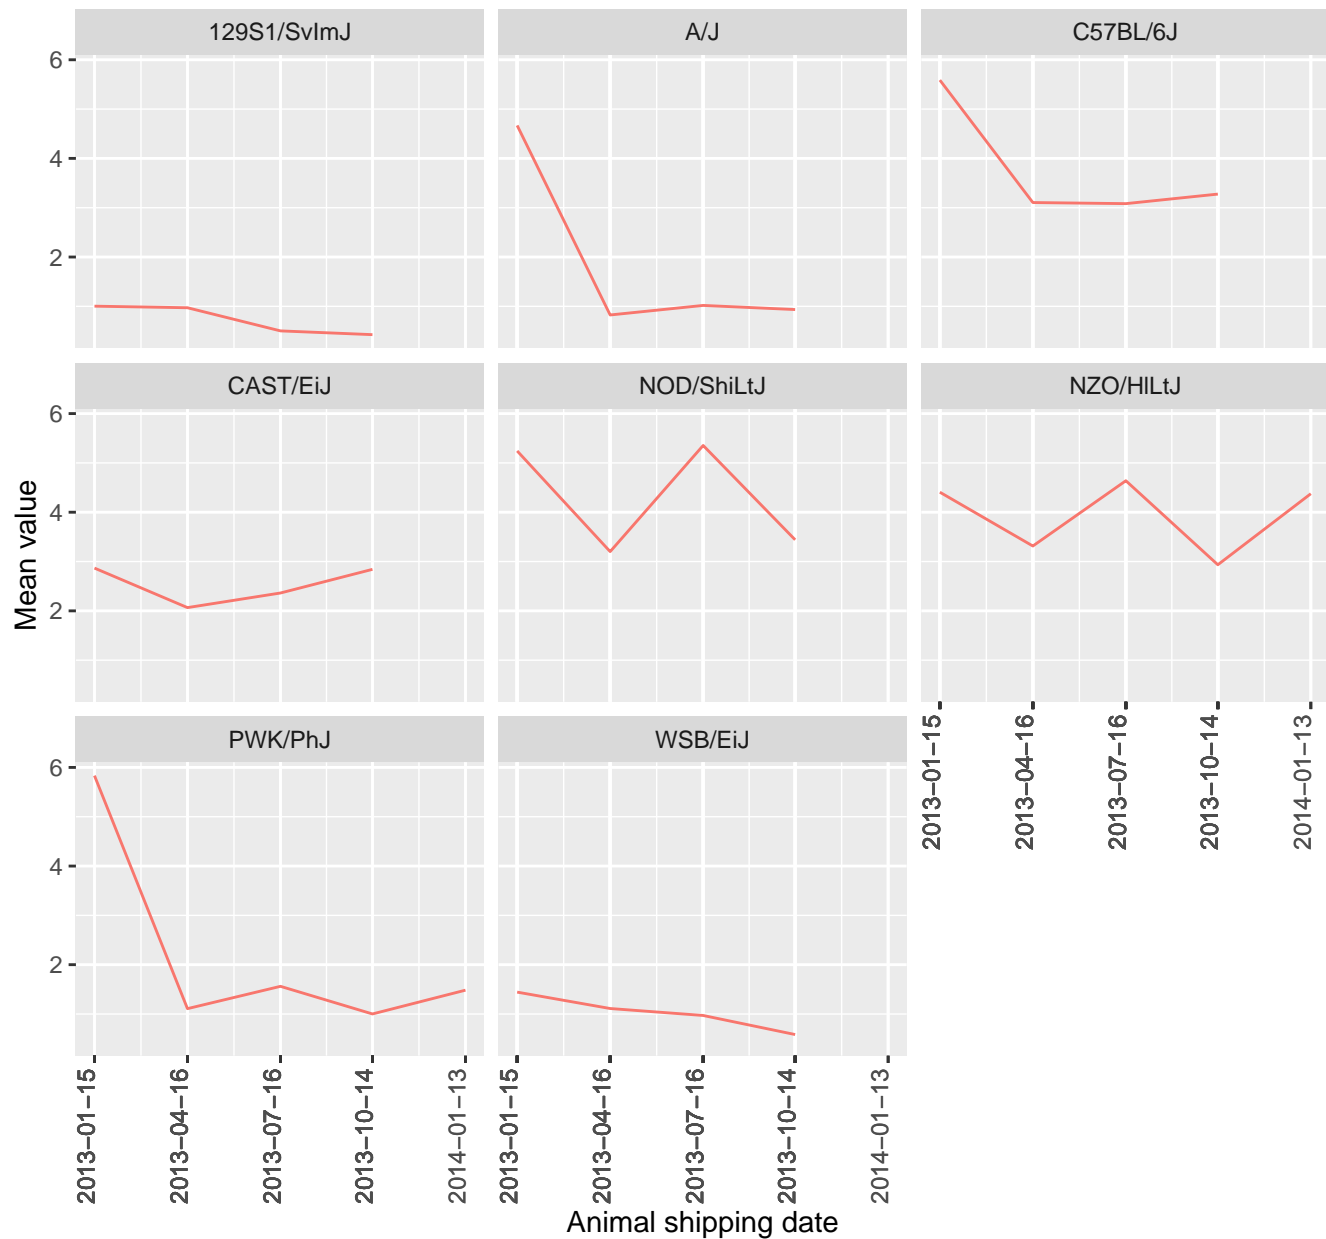

Procedure: GMC10  
Parameter: bw\_13wk

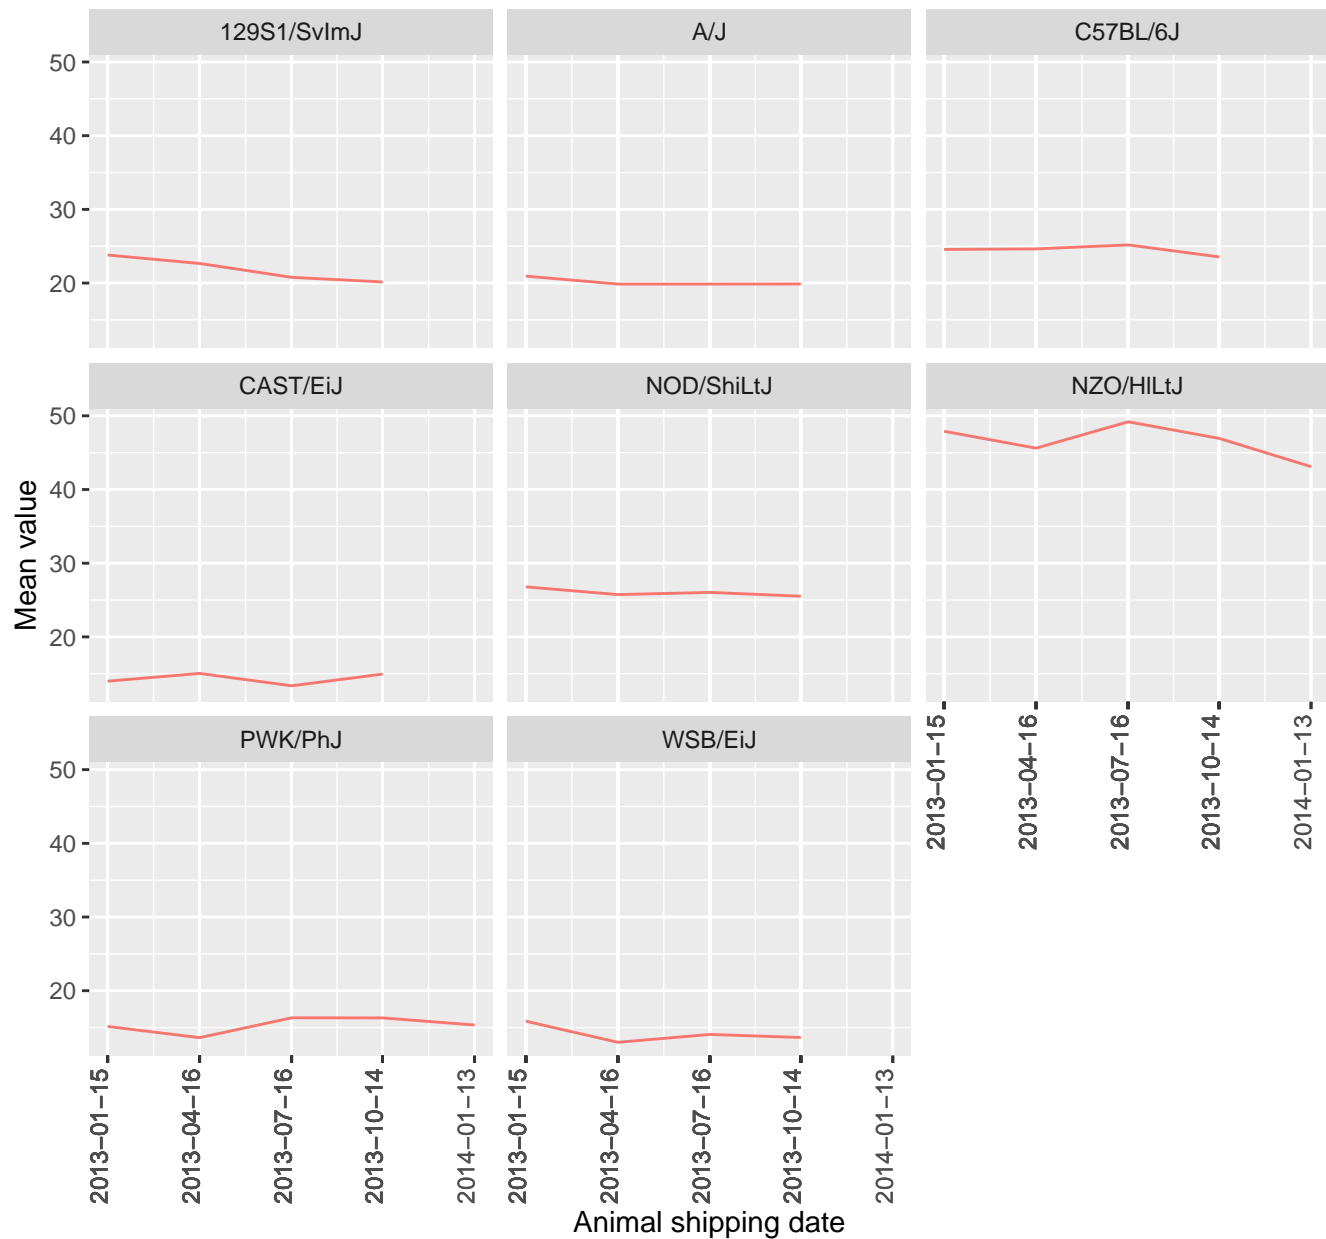

Procedure: GMC10  
Parameter: bw\_19wk

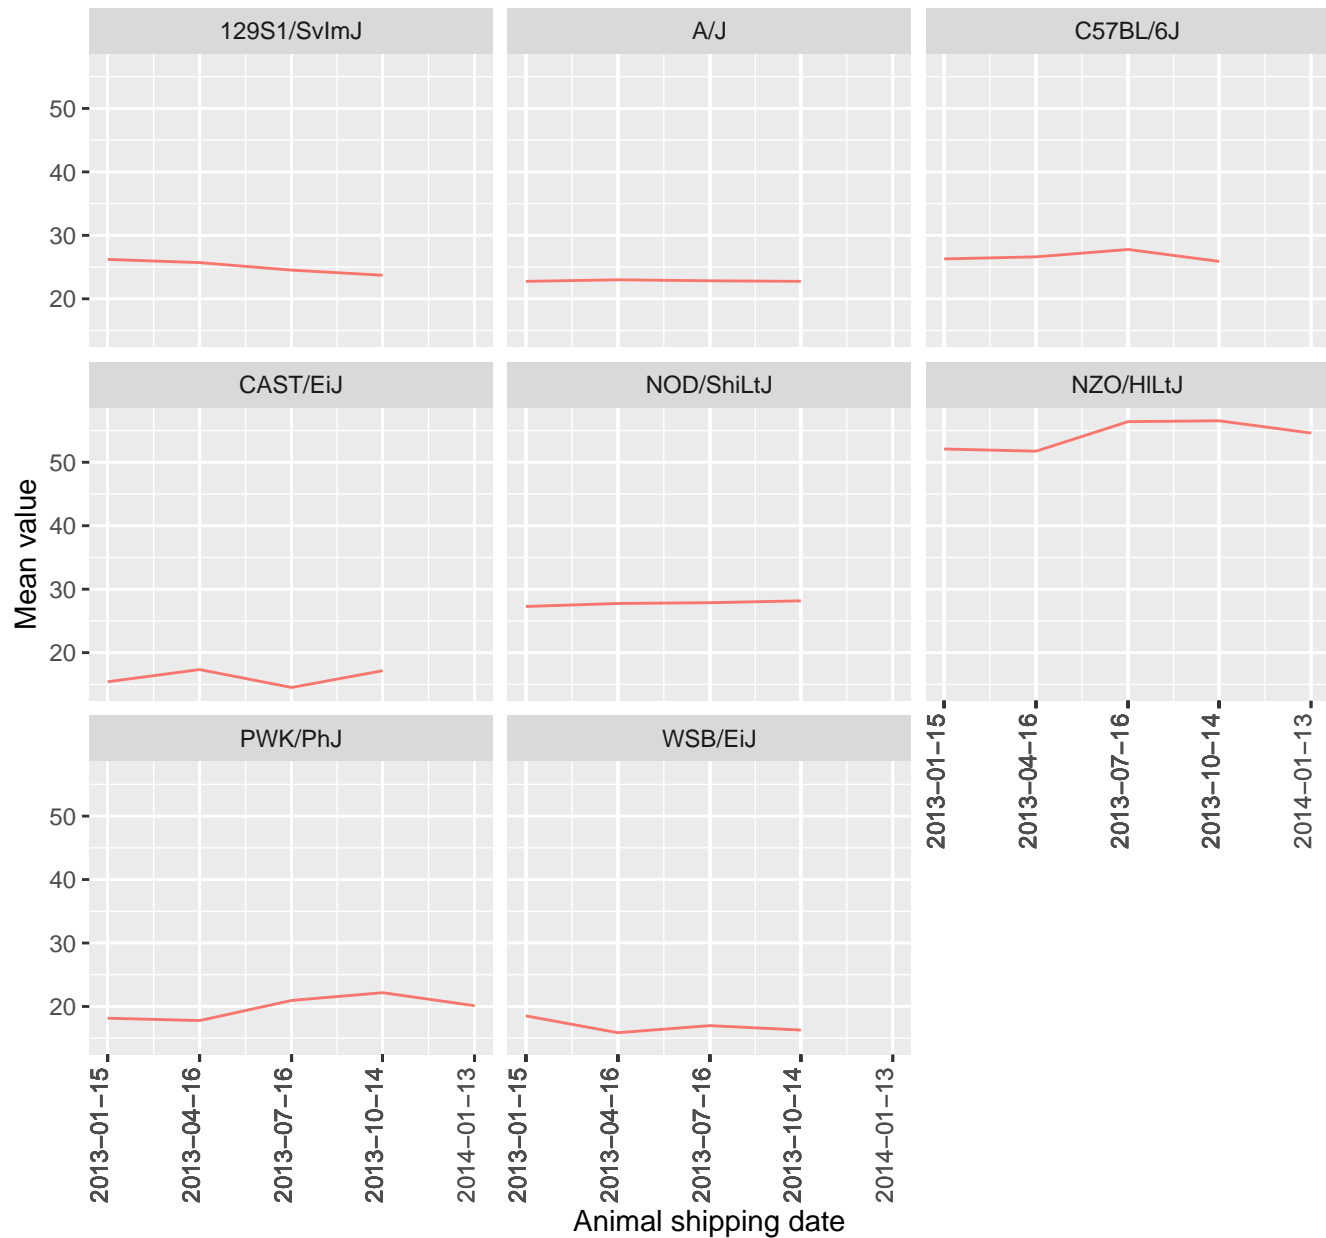

Procedure: GMC10  
Parameter: fat\_13wk

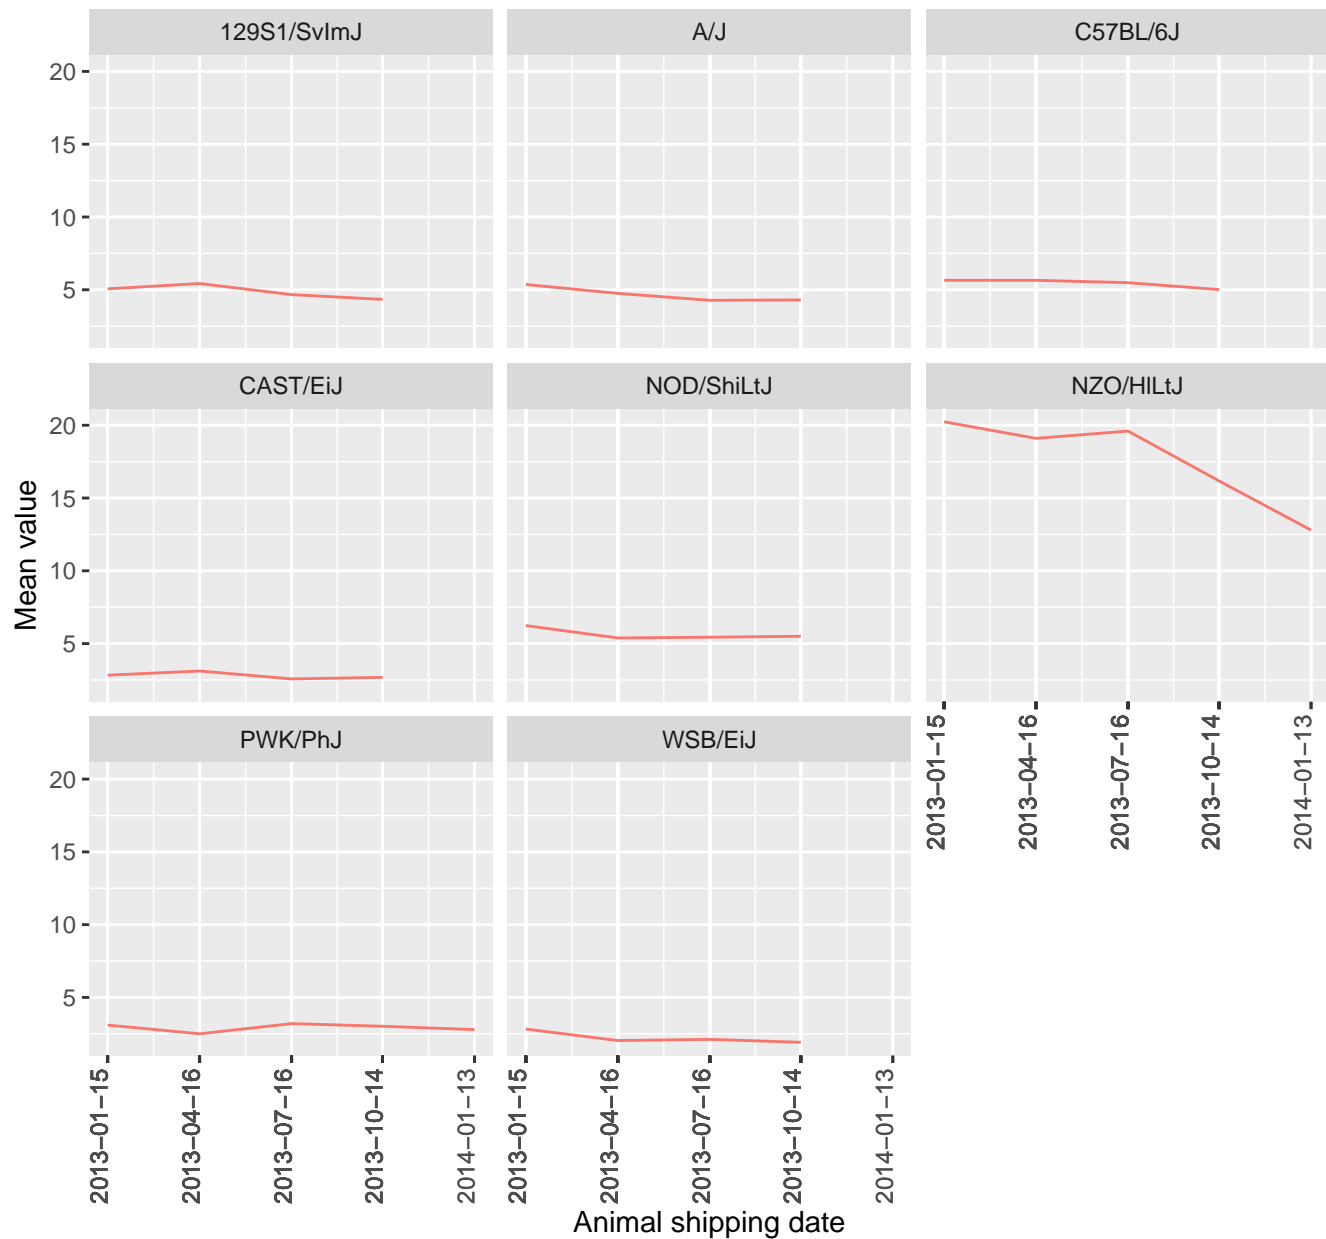

Procedure: GMC10  
Parameter: fat\_19wk

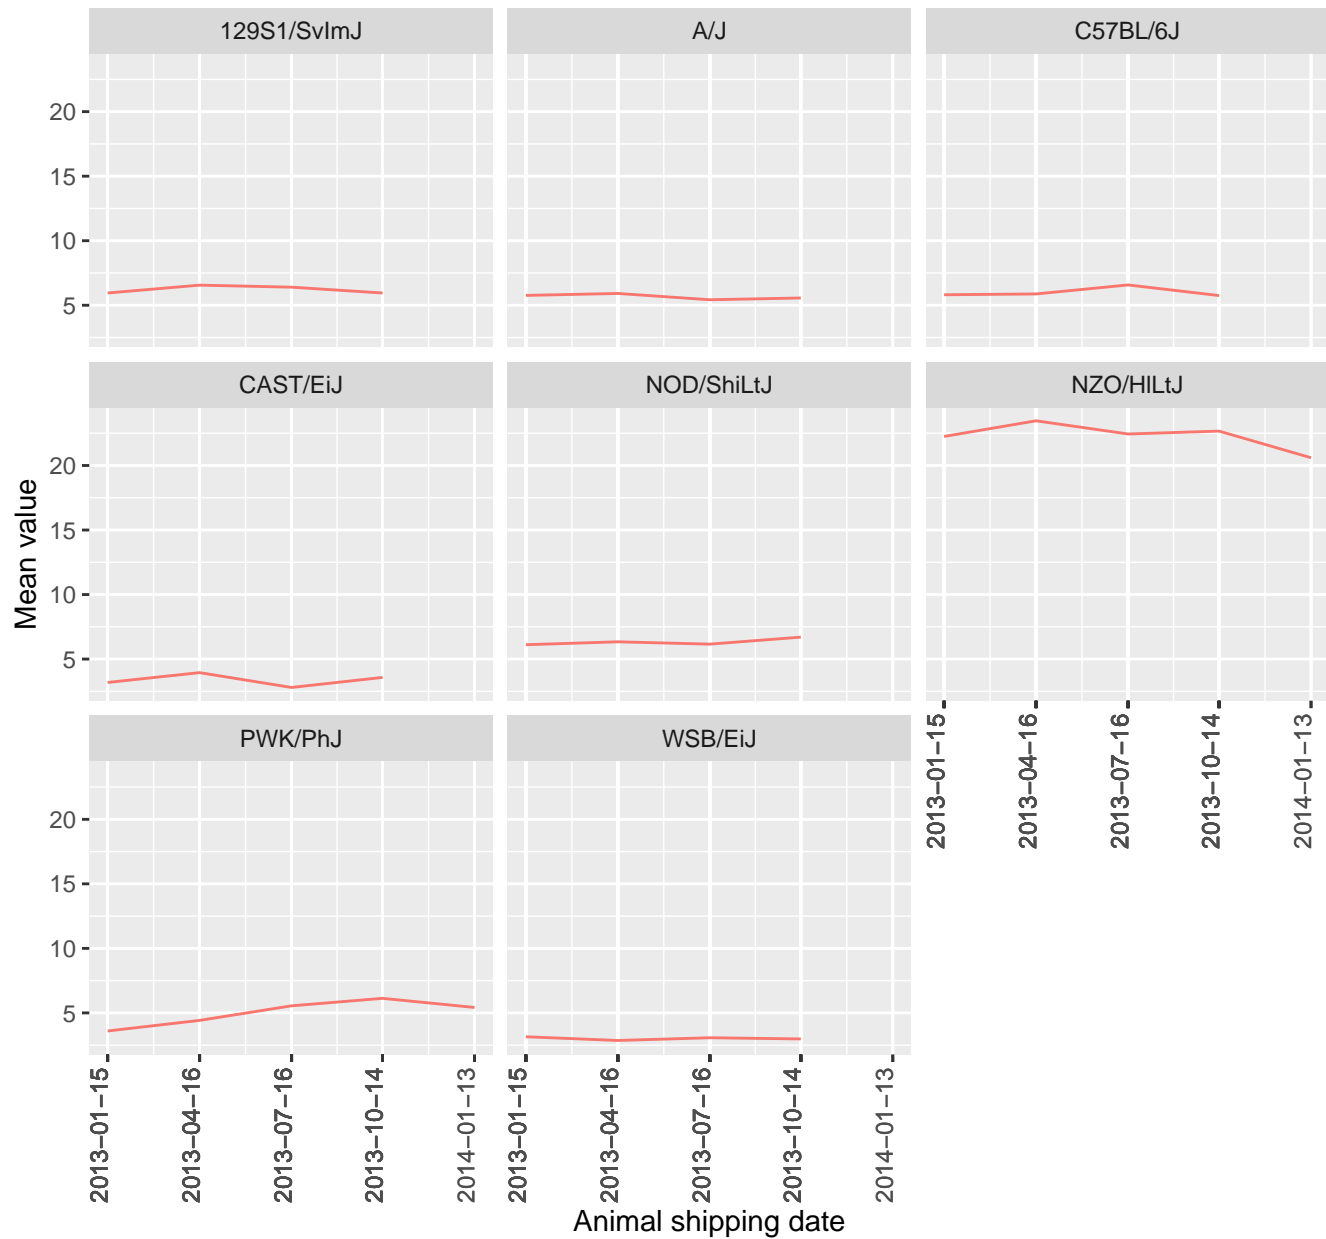

Procedure: GMC10  
Parameter: lean\_13wk

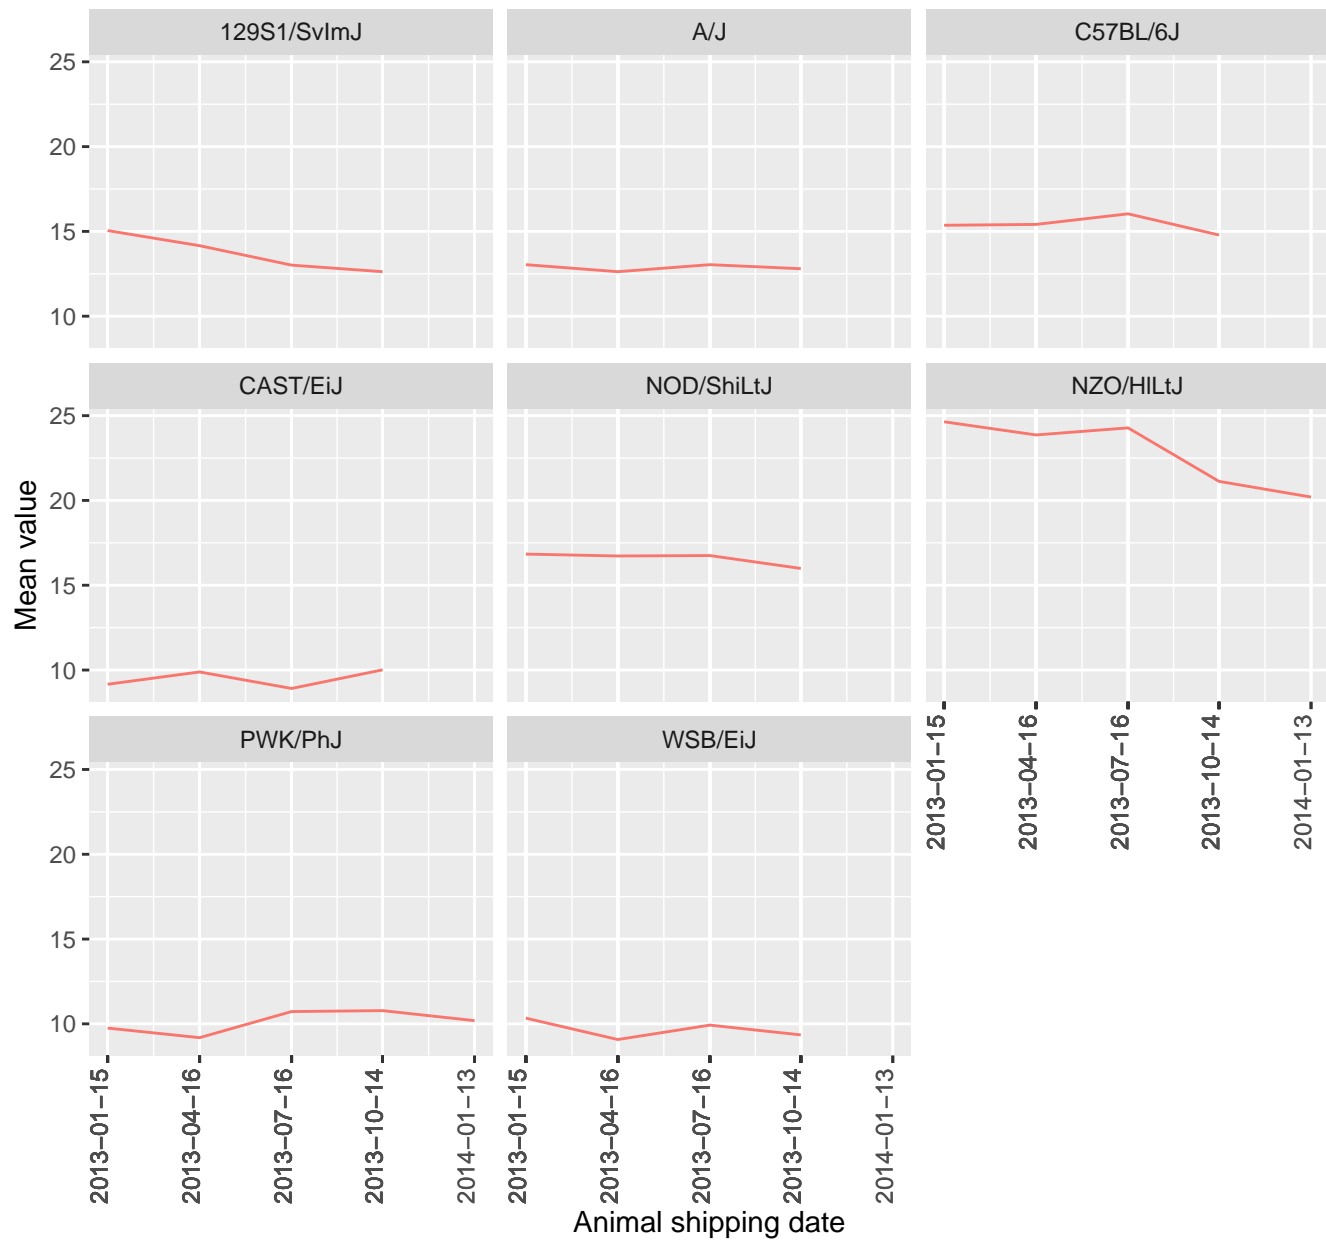

Procedure: GMC10  
Parameter: lean\_19wk

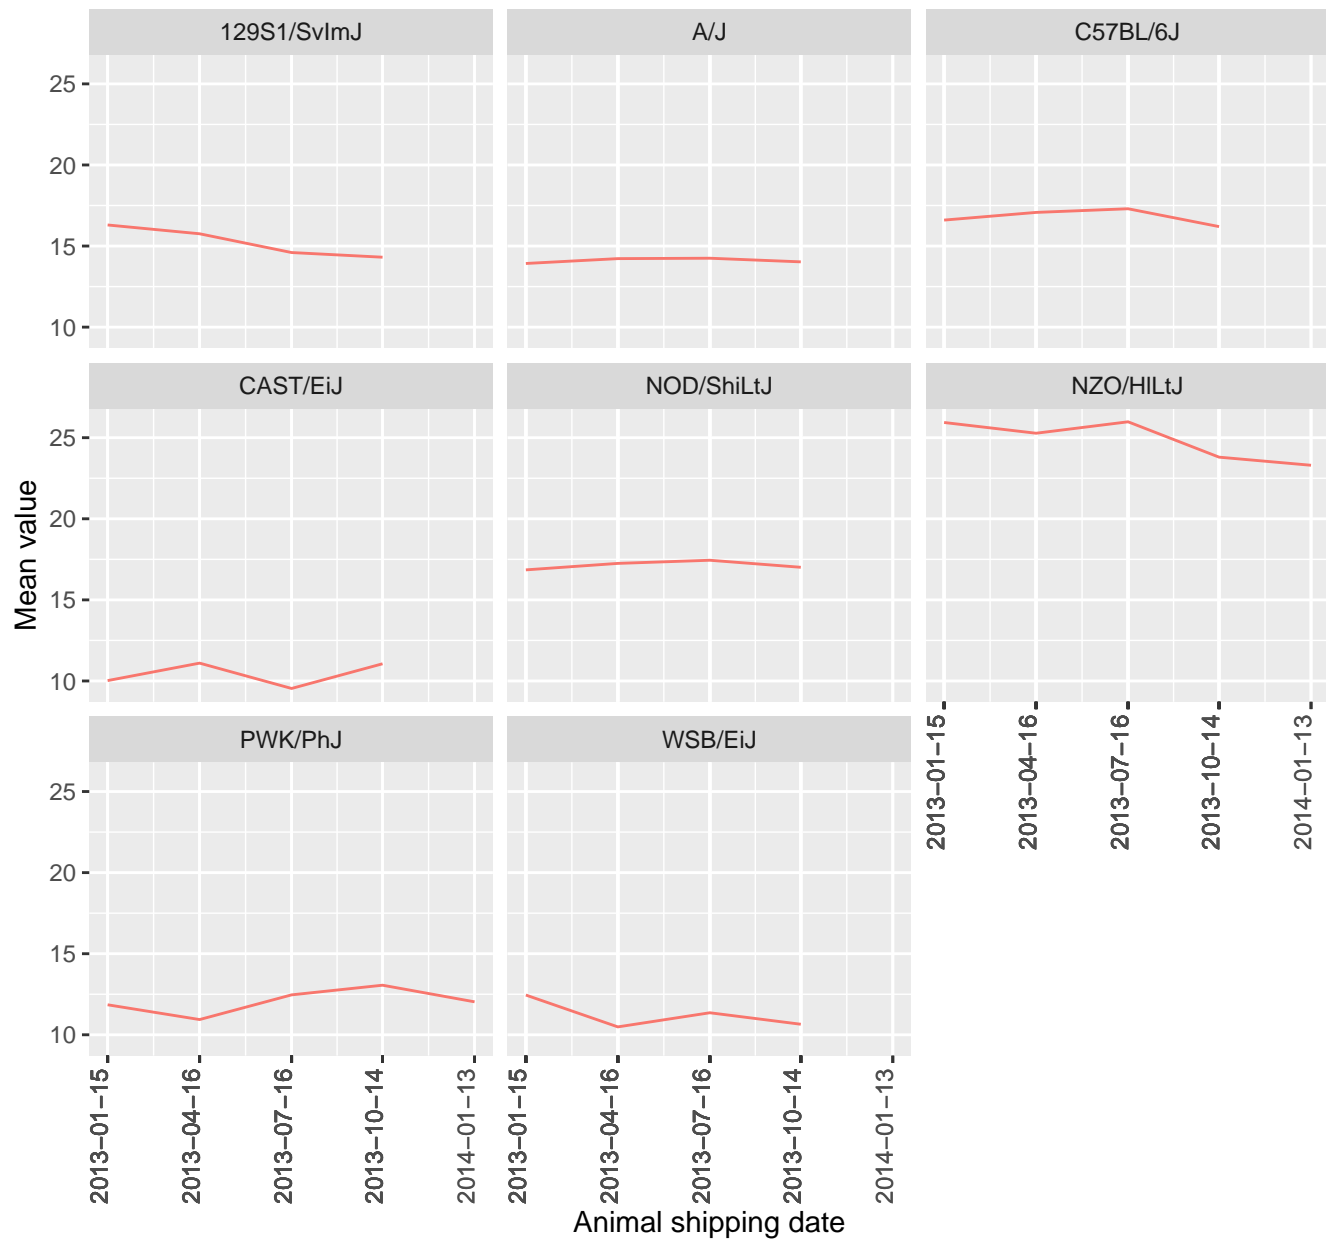

Procedure: GMC11

Parameter: AUC\_by\_HAMED

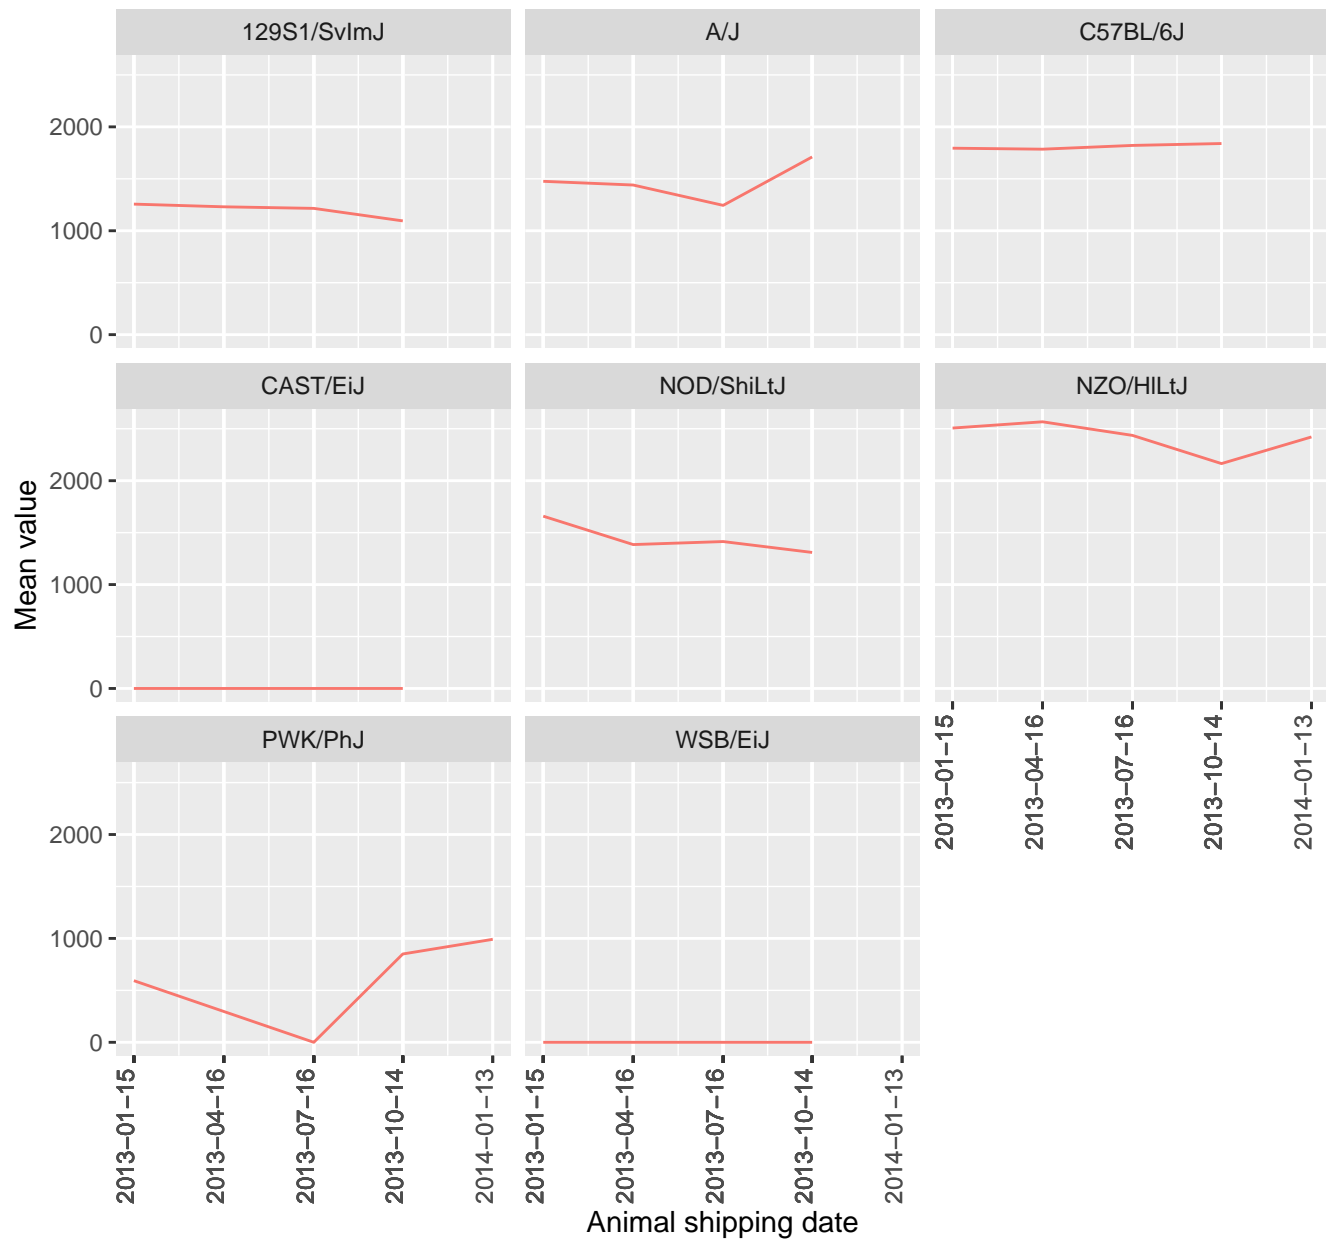



Procedure: GMC11  
Parameter: GLU\_0

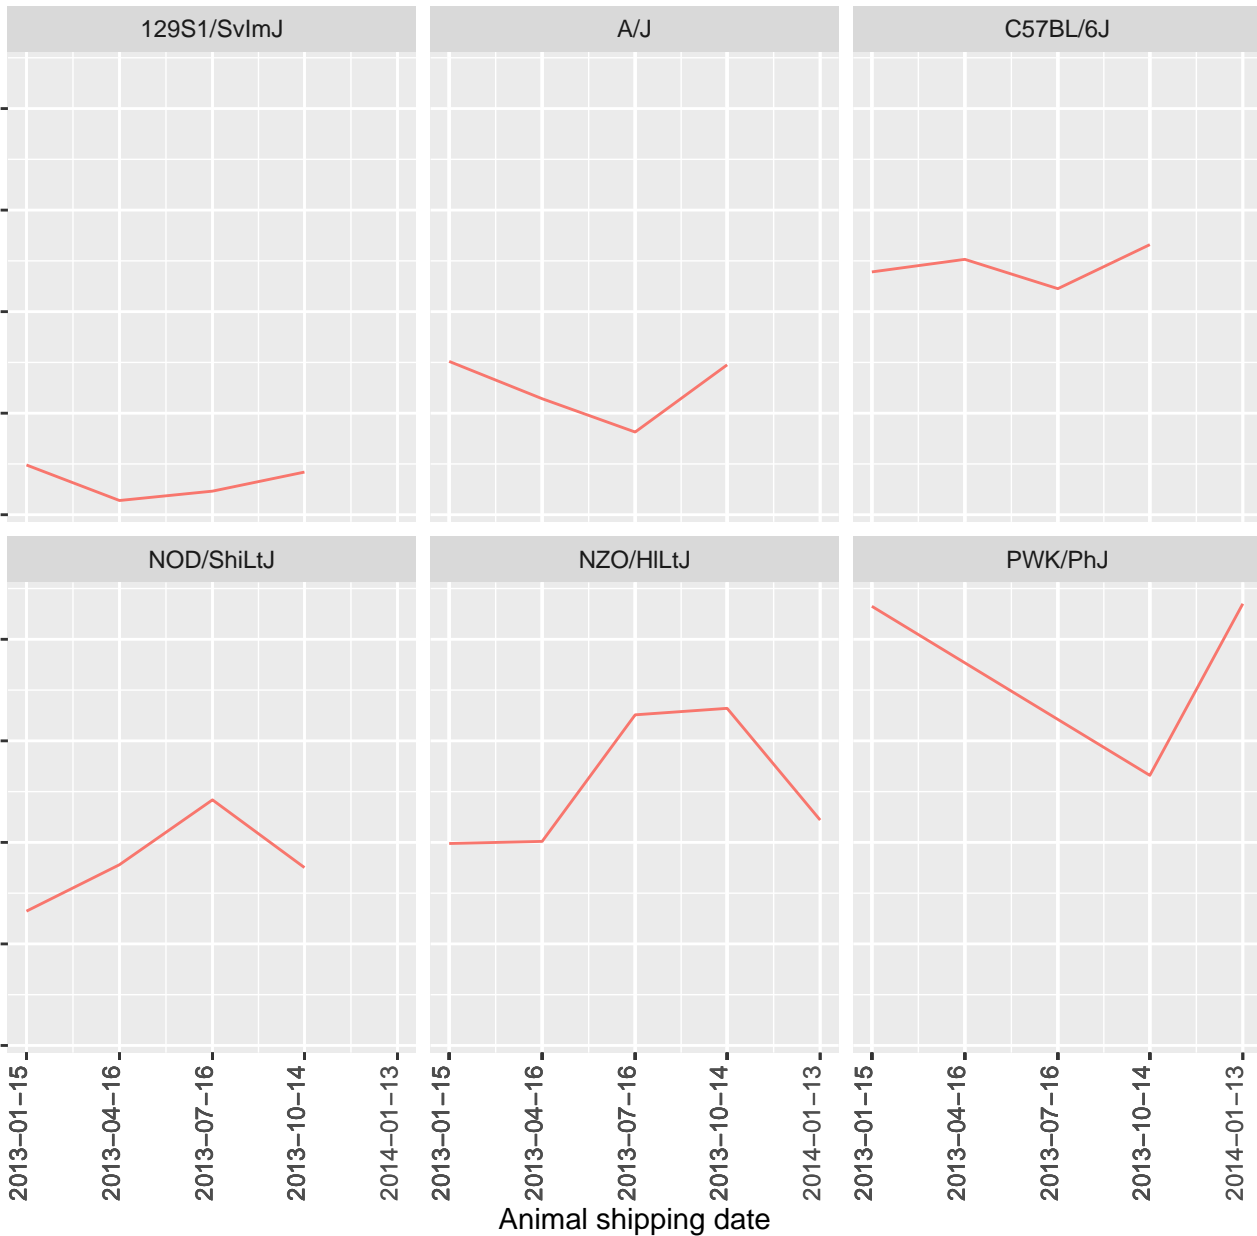

Procedure: GMC11  
Parameter: GLU\_120

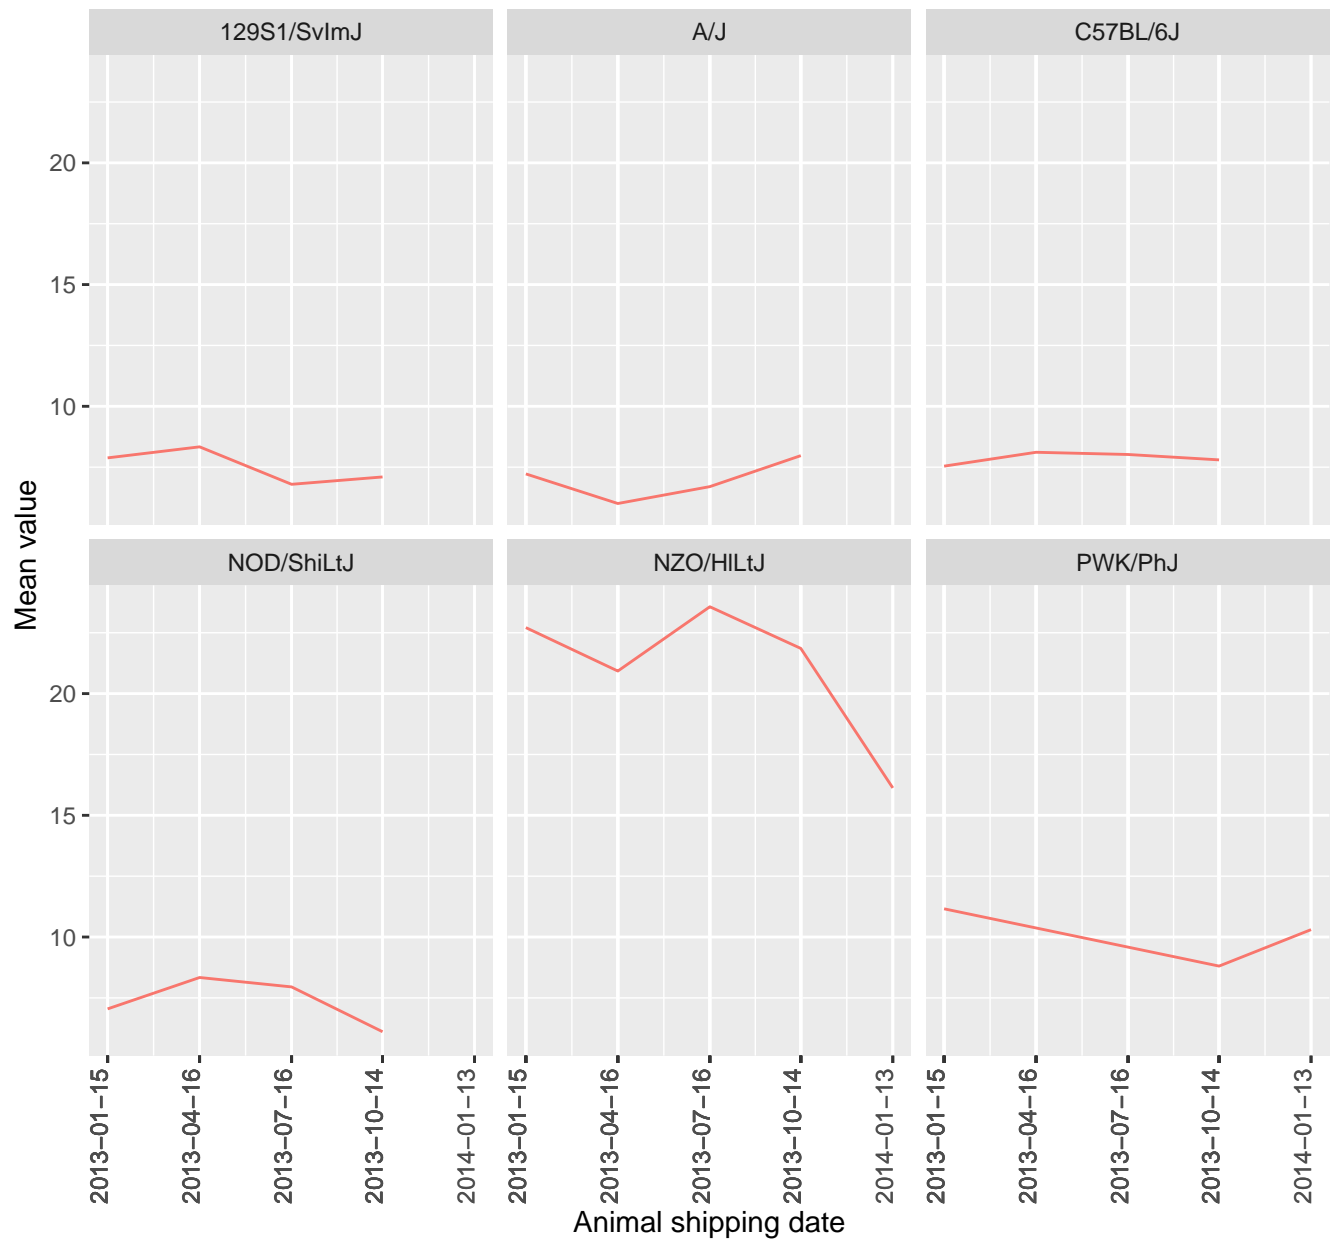

Procedure: GMC11  
Parameter: GLU\_15

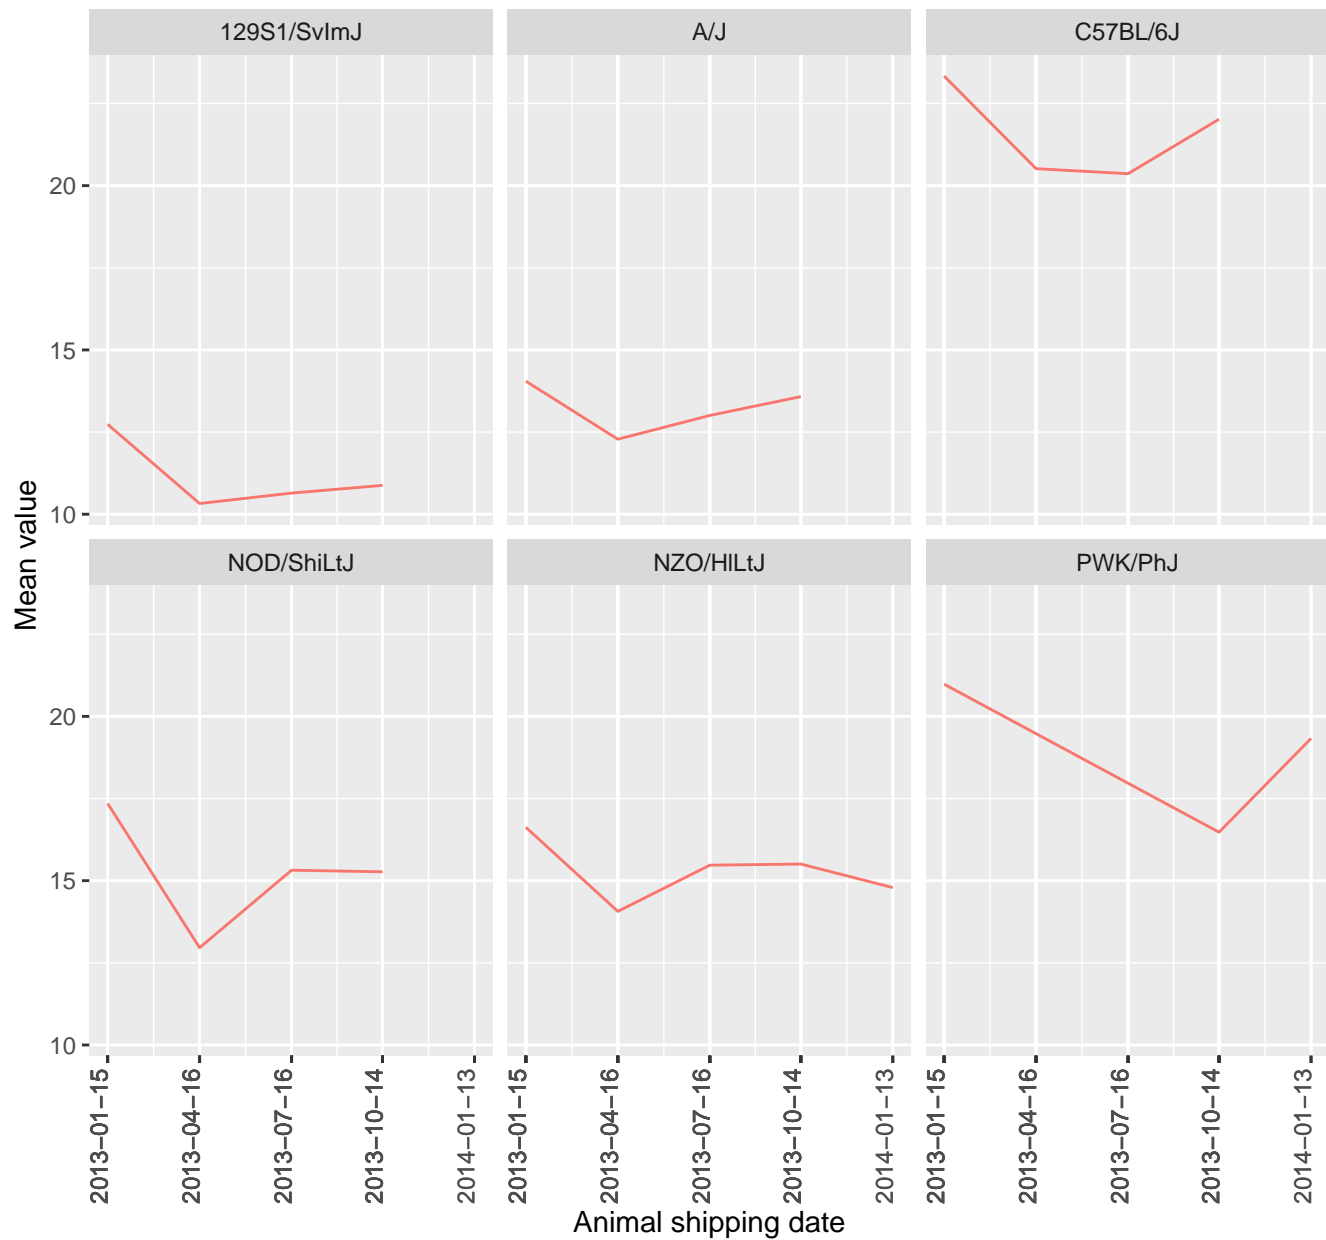

Procedure: GMC11  
Parameter: GLU\_30

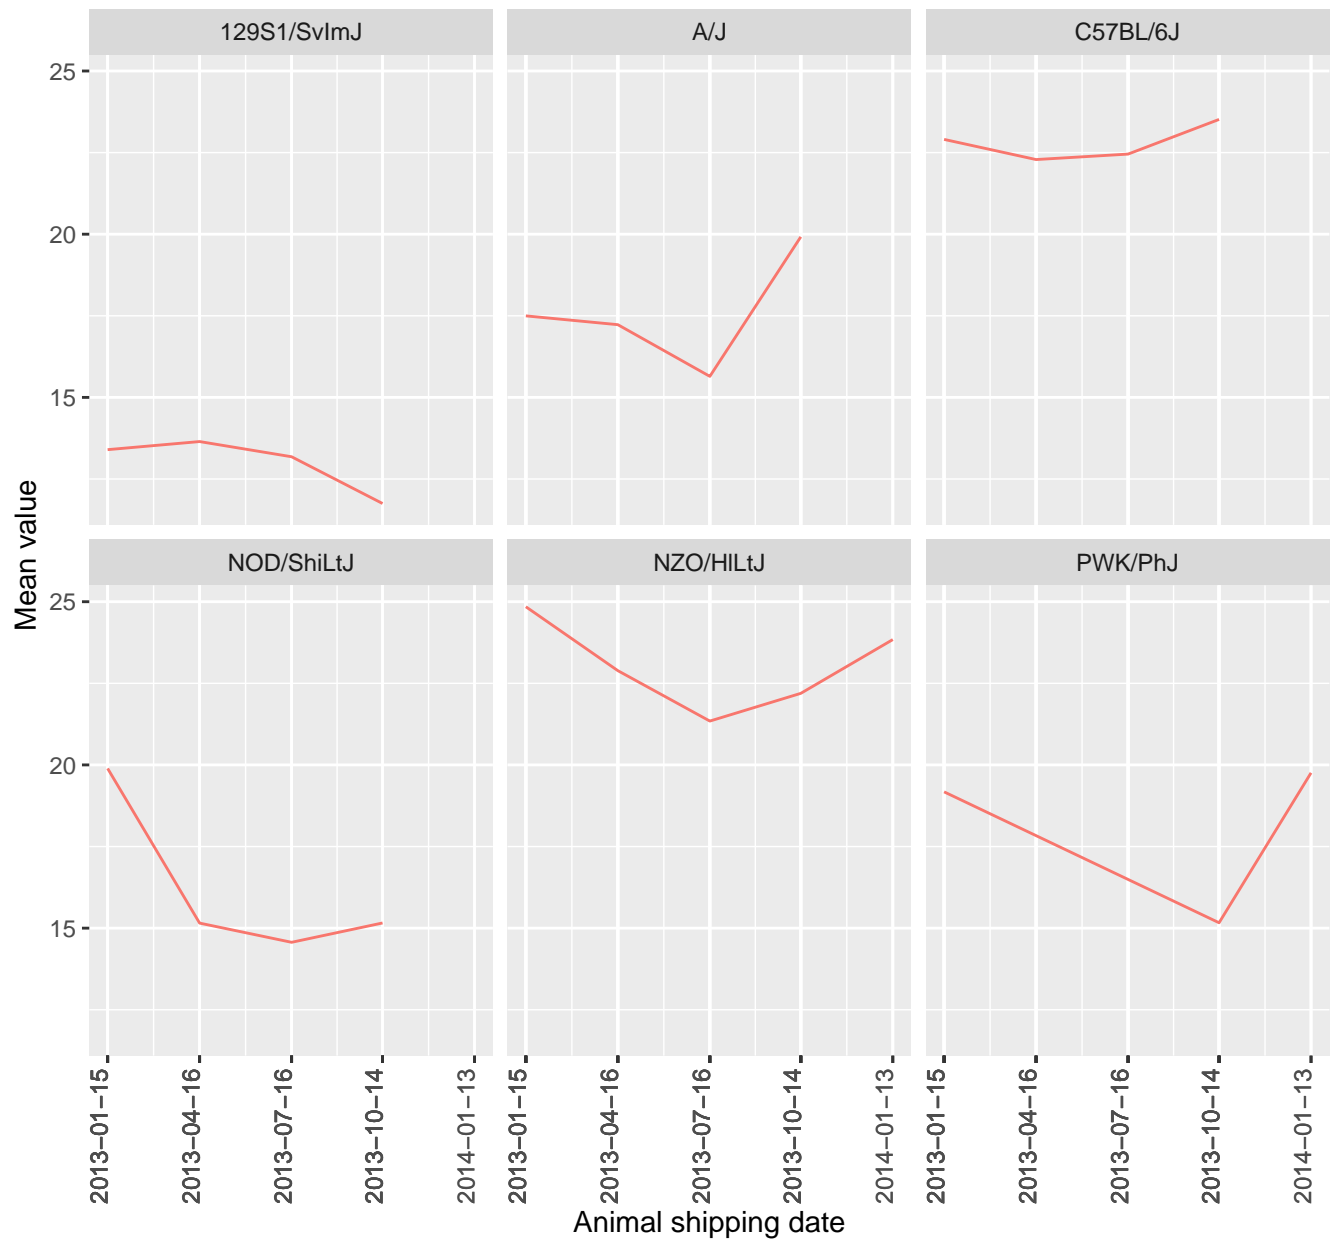

Procedure: GMC11  
Parameter: GLU\_60

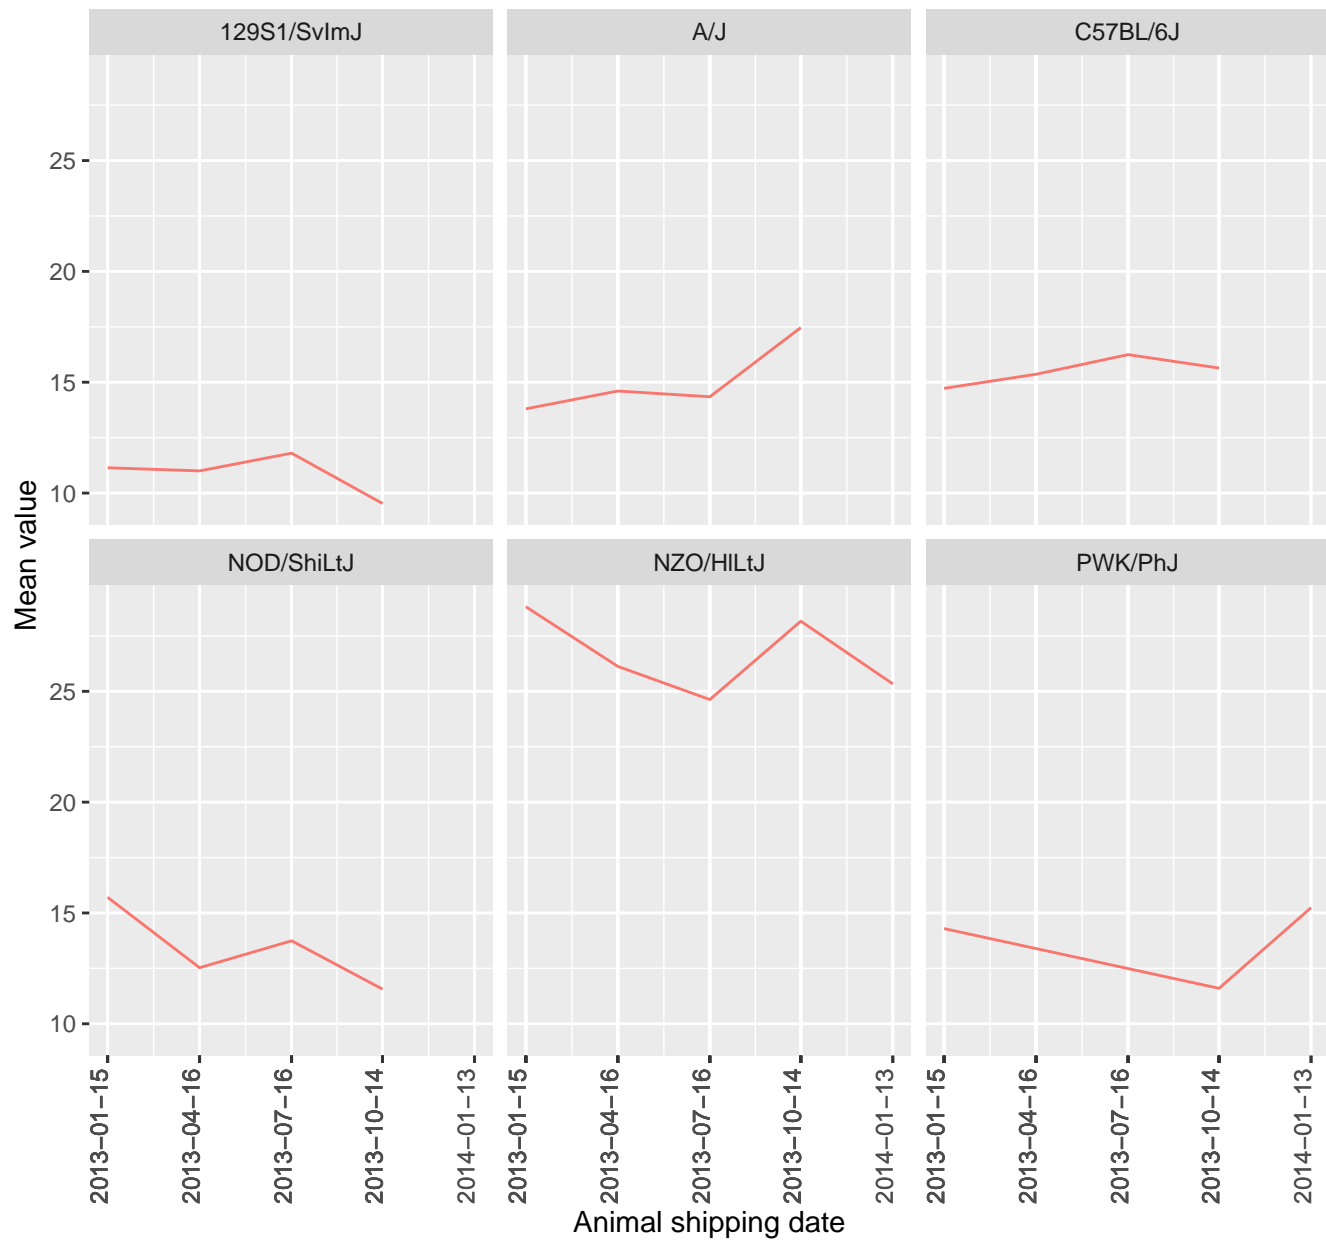

Procedure: GMC11

Parameter: GLU\_vol\_inj

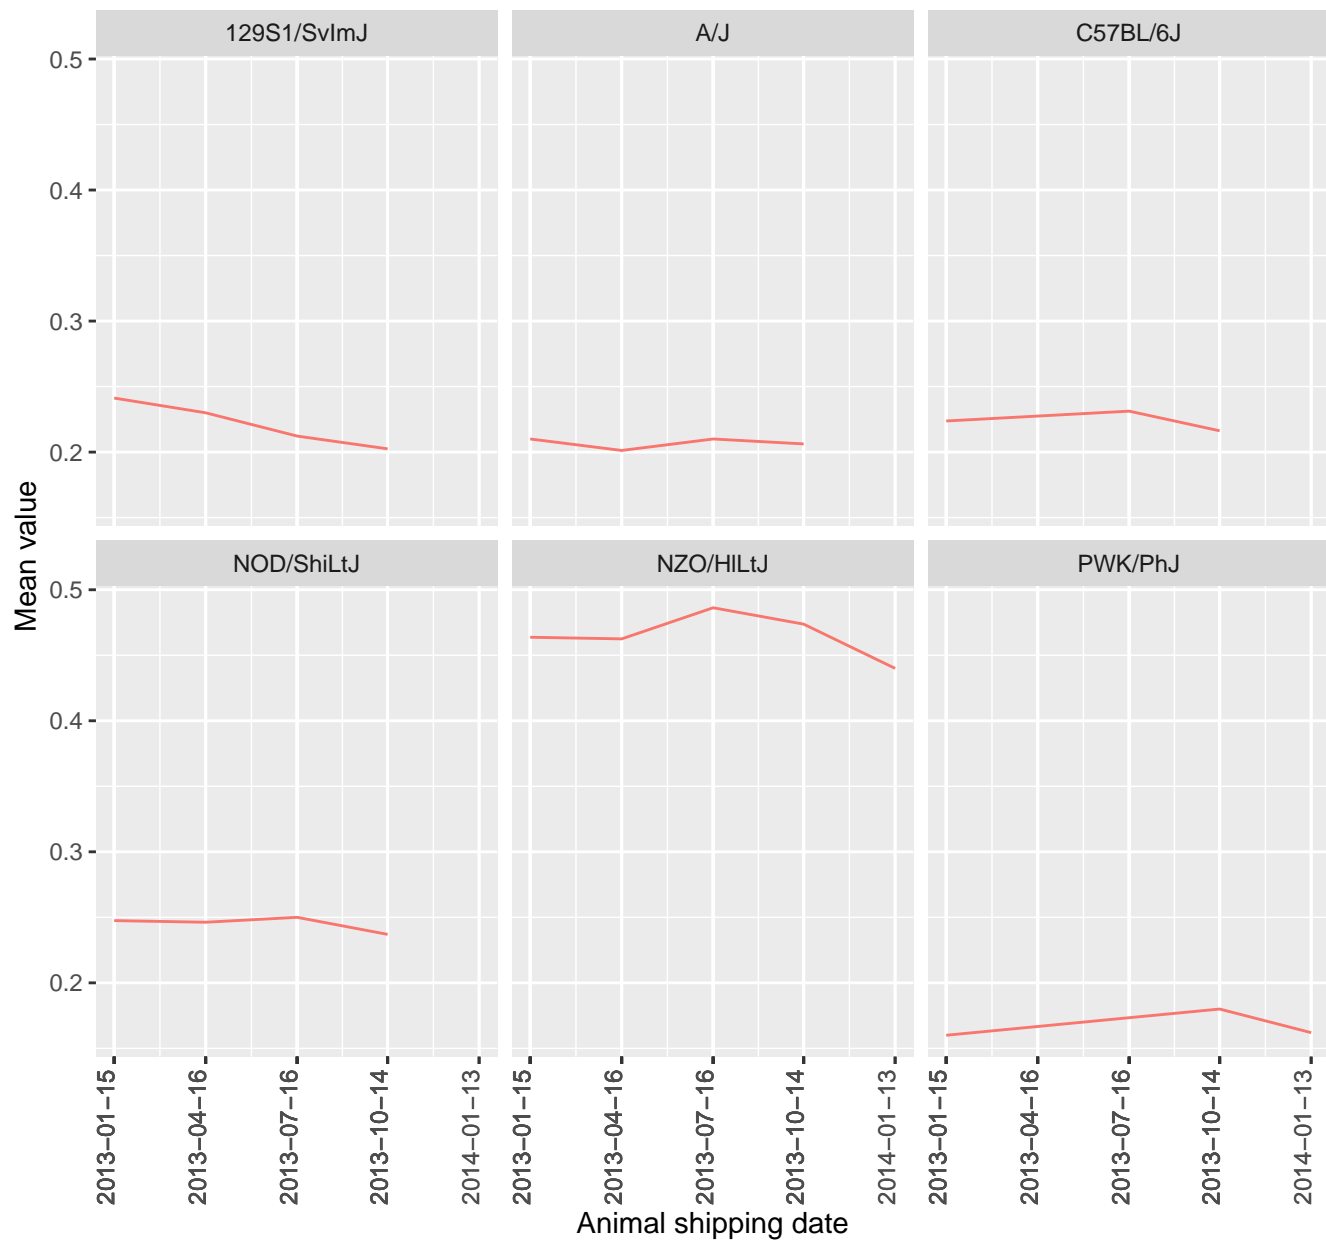

Procedure: GMC12  
Parameter: cardiac\_output

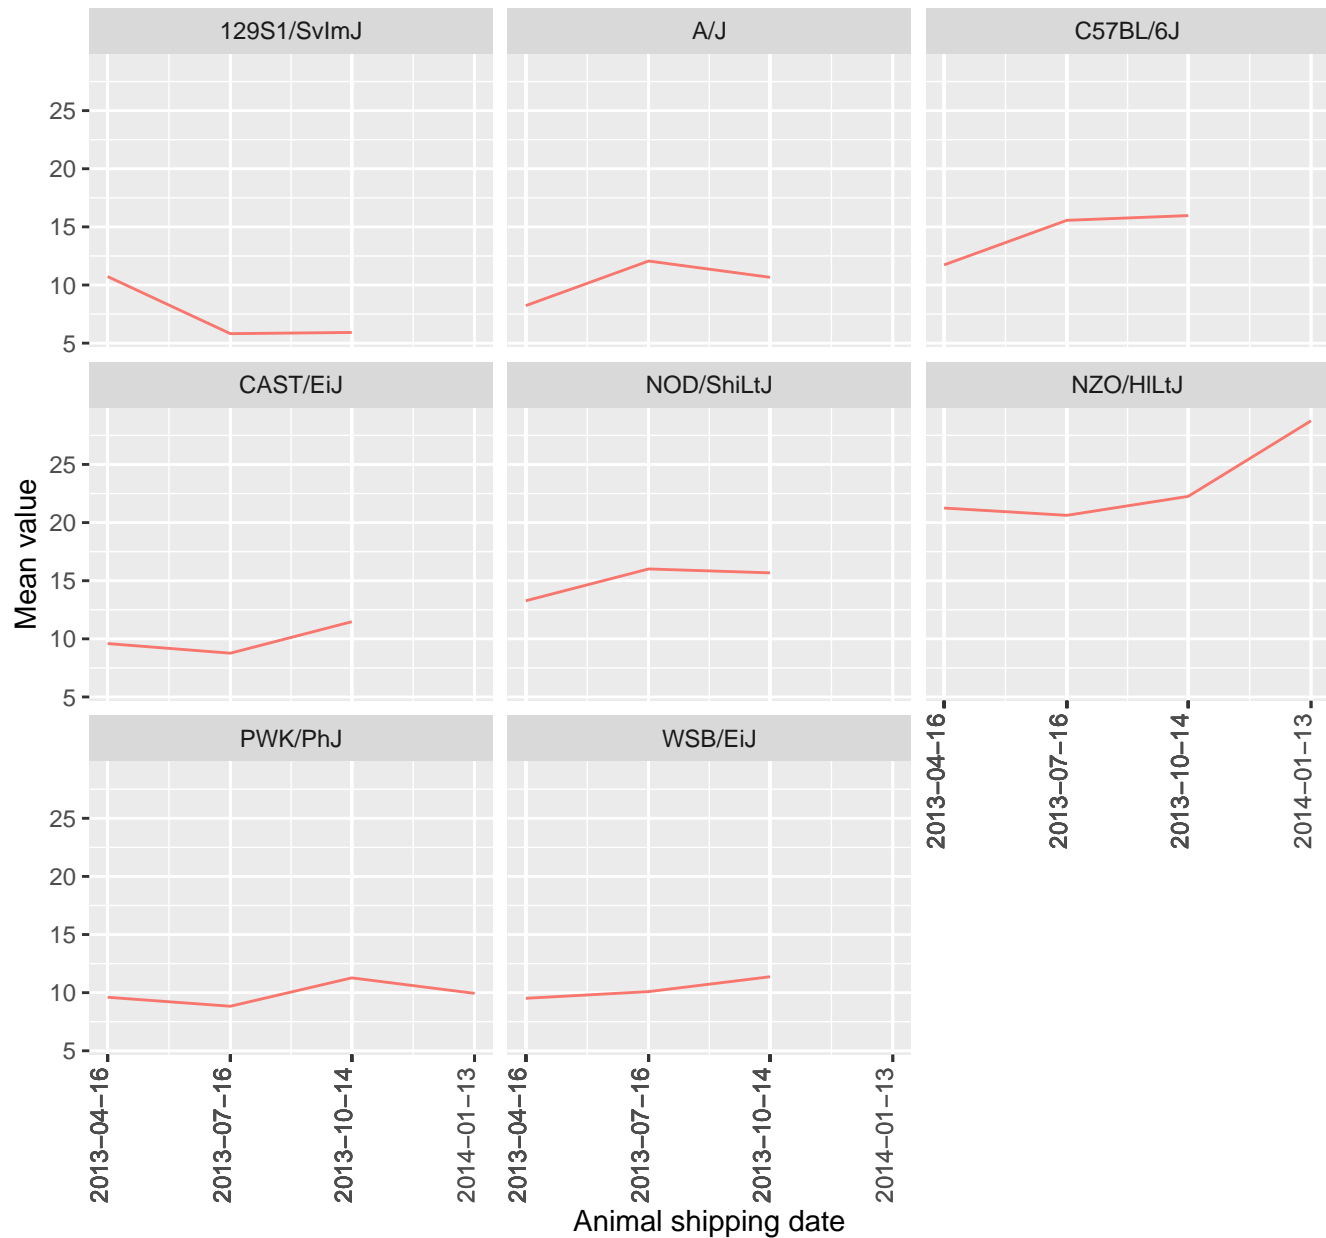

Procedure: GMC12  
Parameter: EJ\_fraction

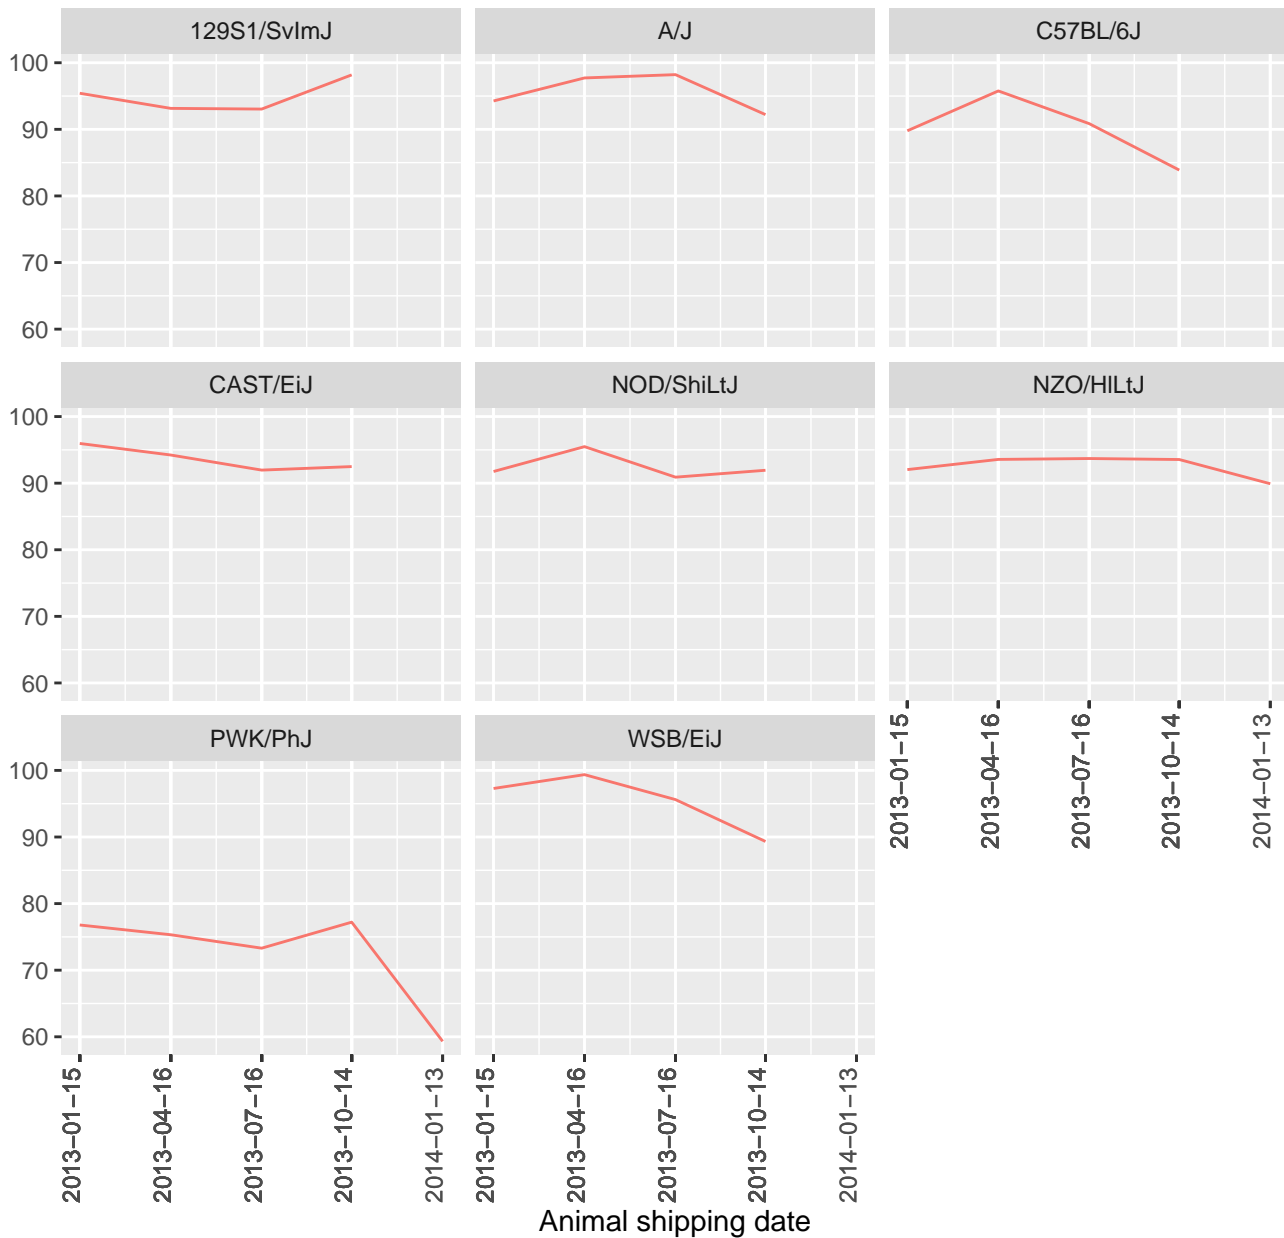



Procedure: GMC12  
Parameter: fract\_shortening

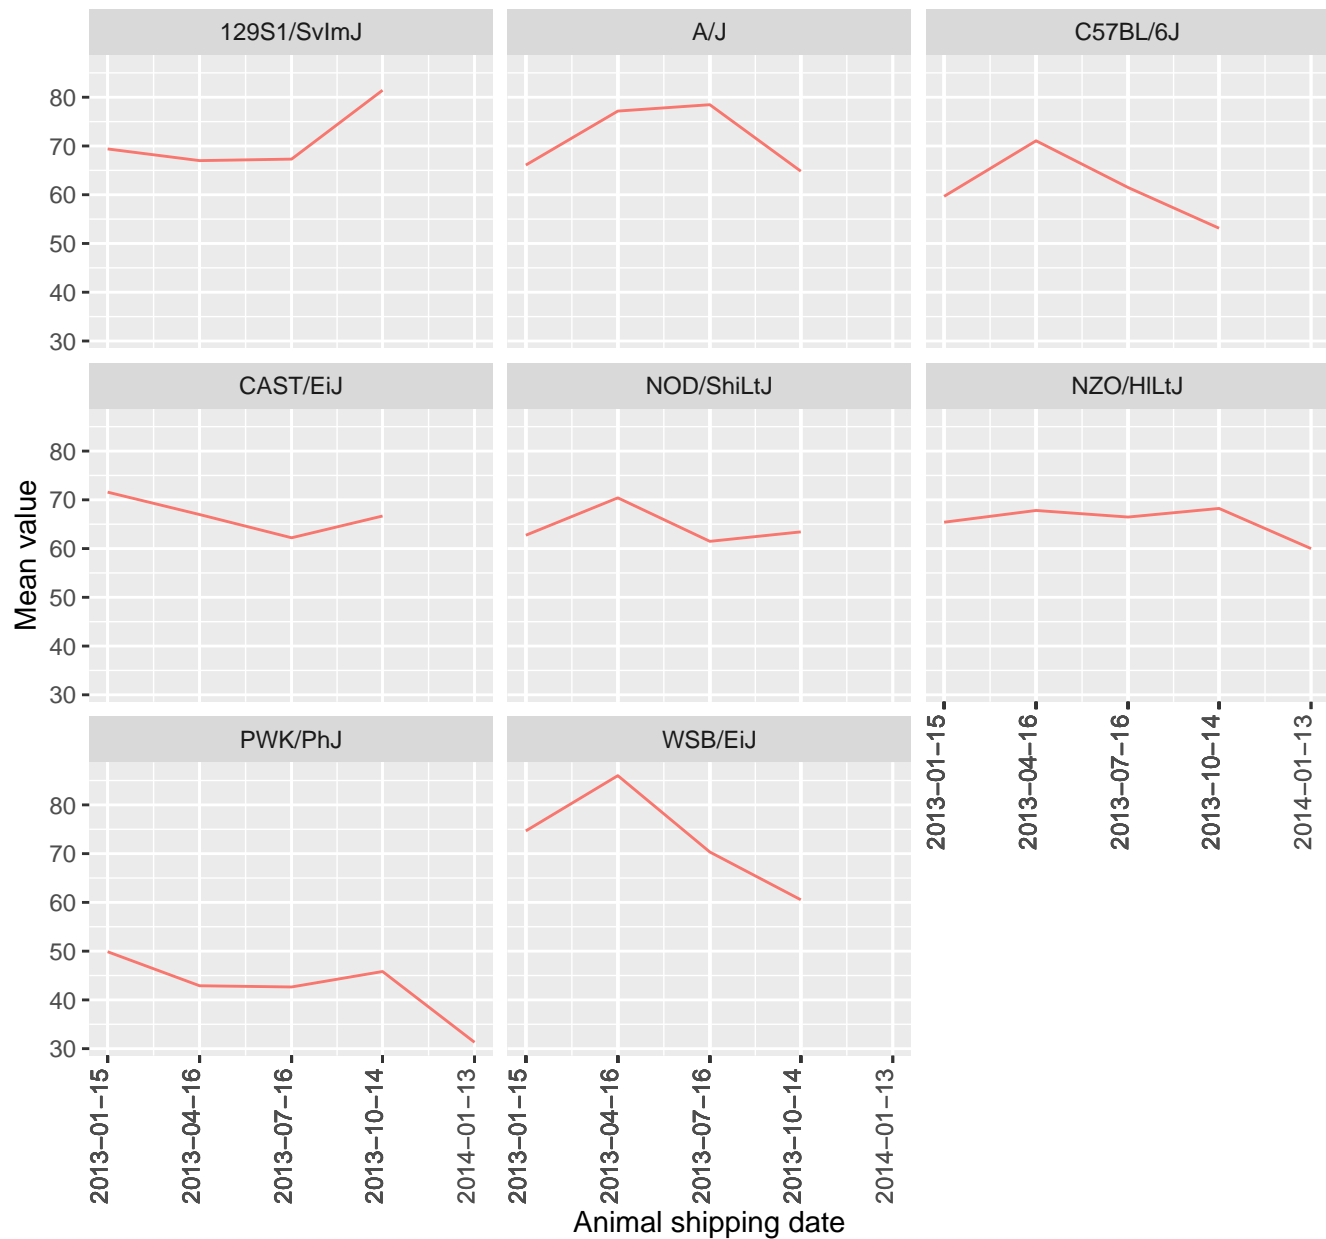

Procedure: GMC12  
Parameter: heart\_rate

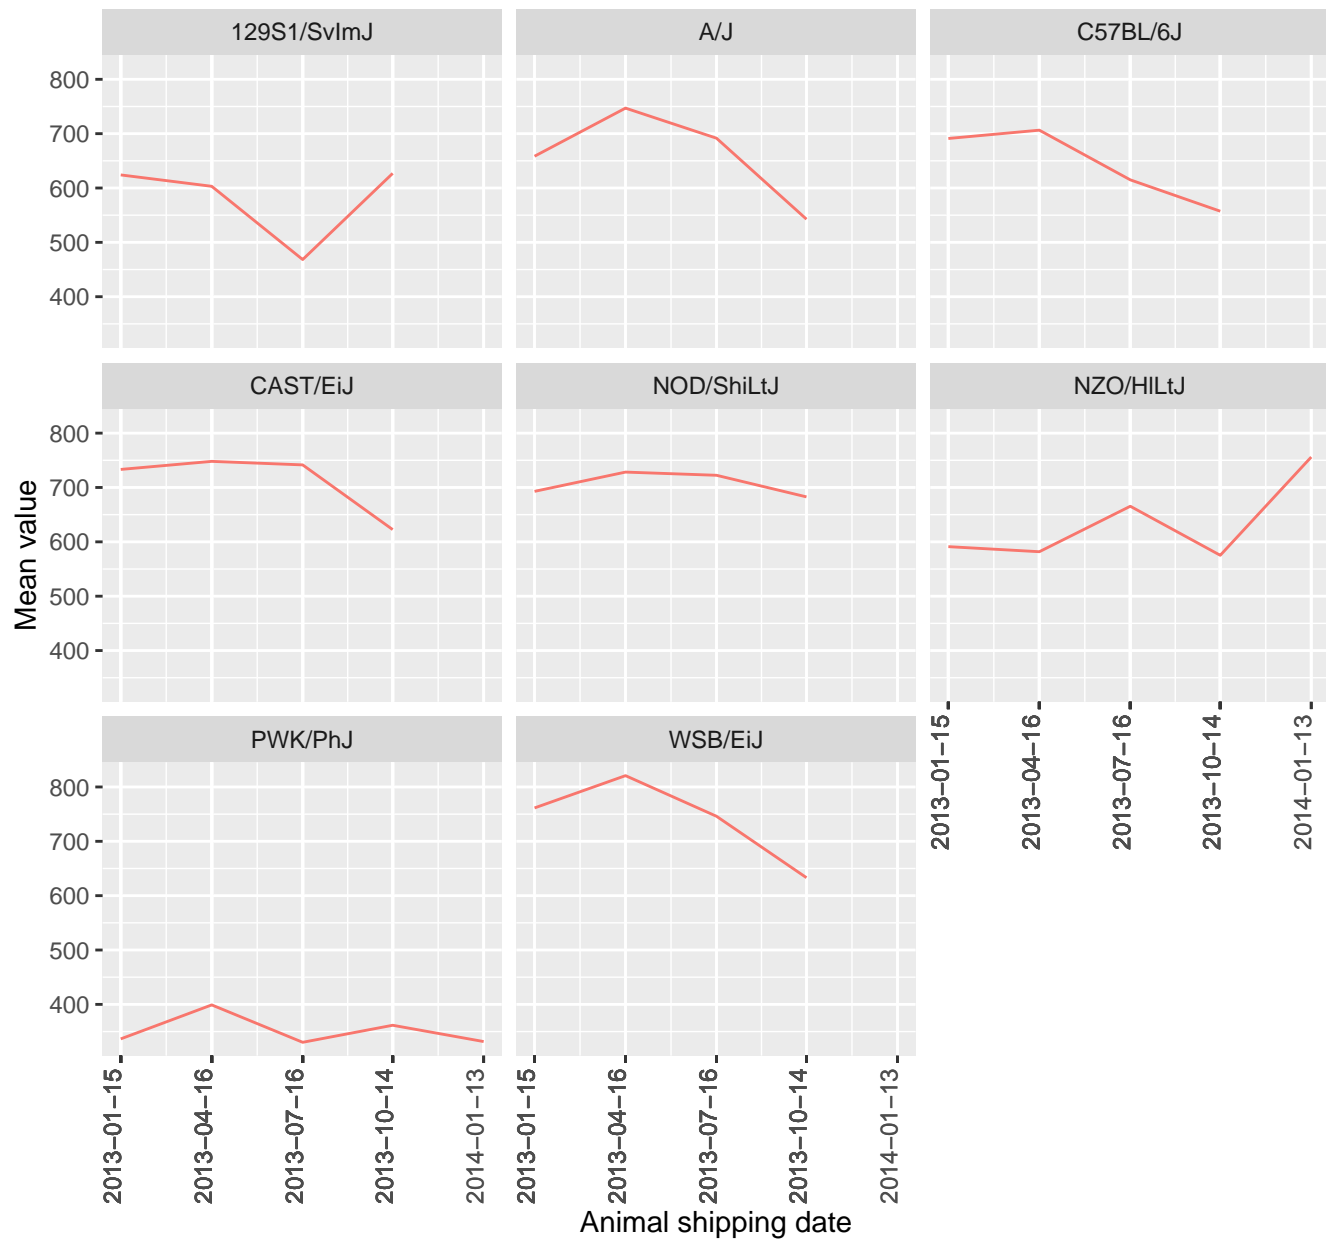

Procedure: GMC12  
Parameter: IVS\_diastole

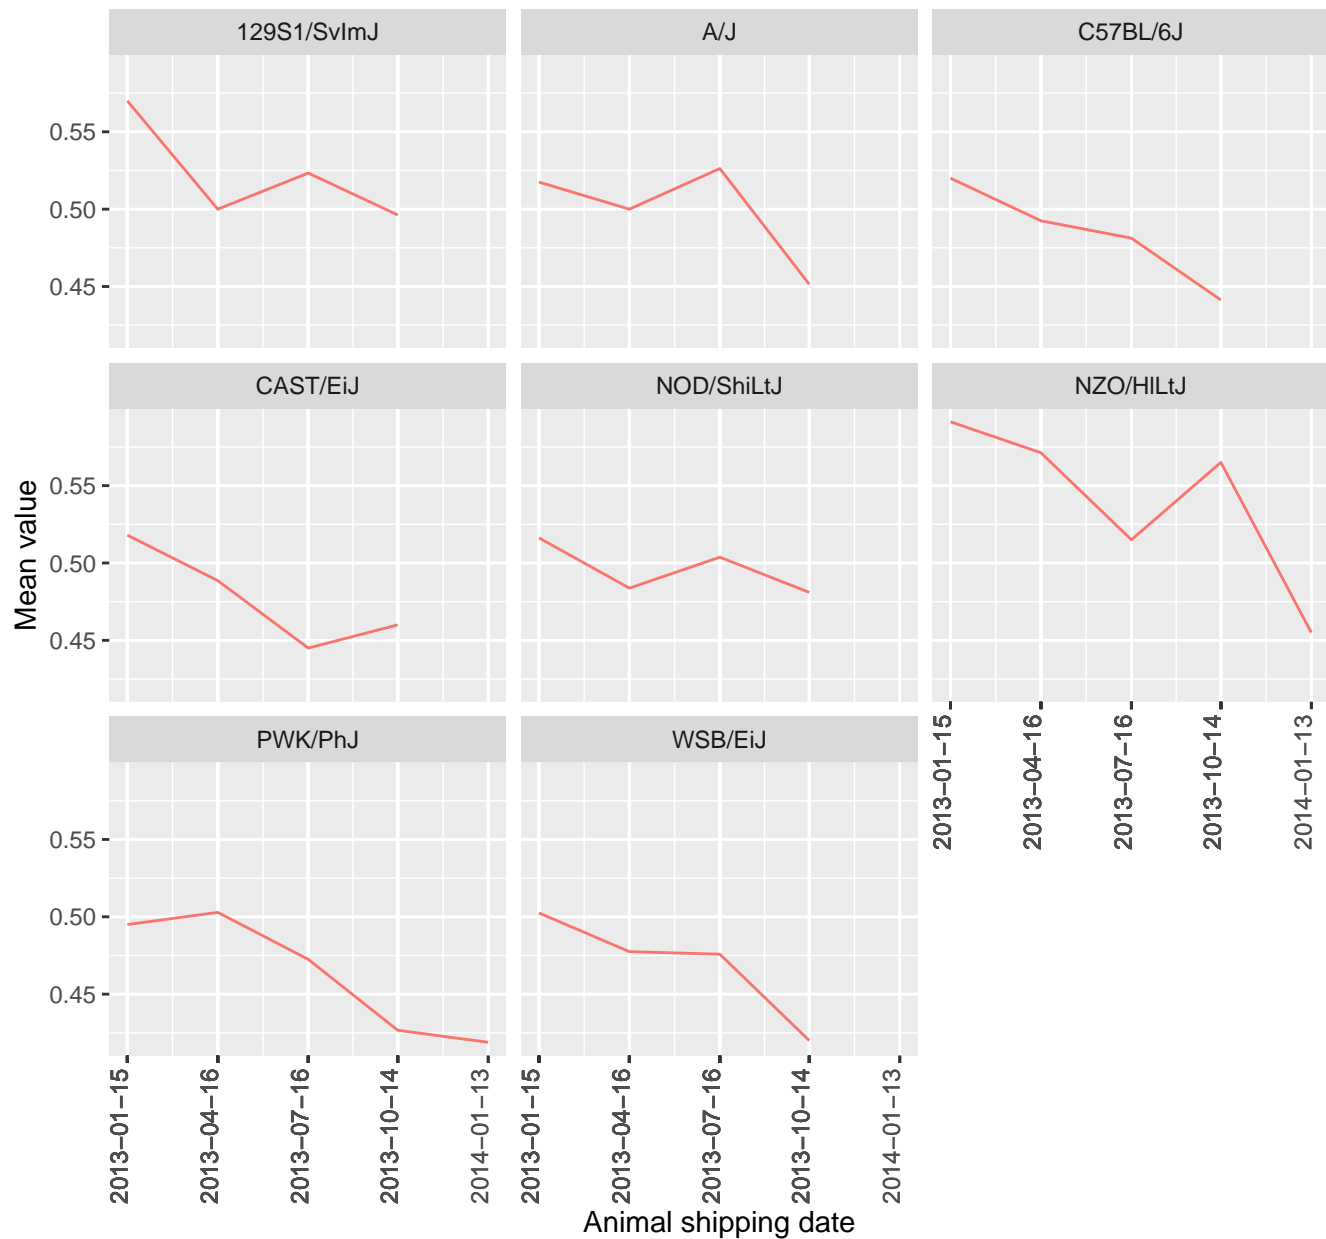

Procedure: GMC12  
Parameter: IVS\_systole

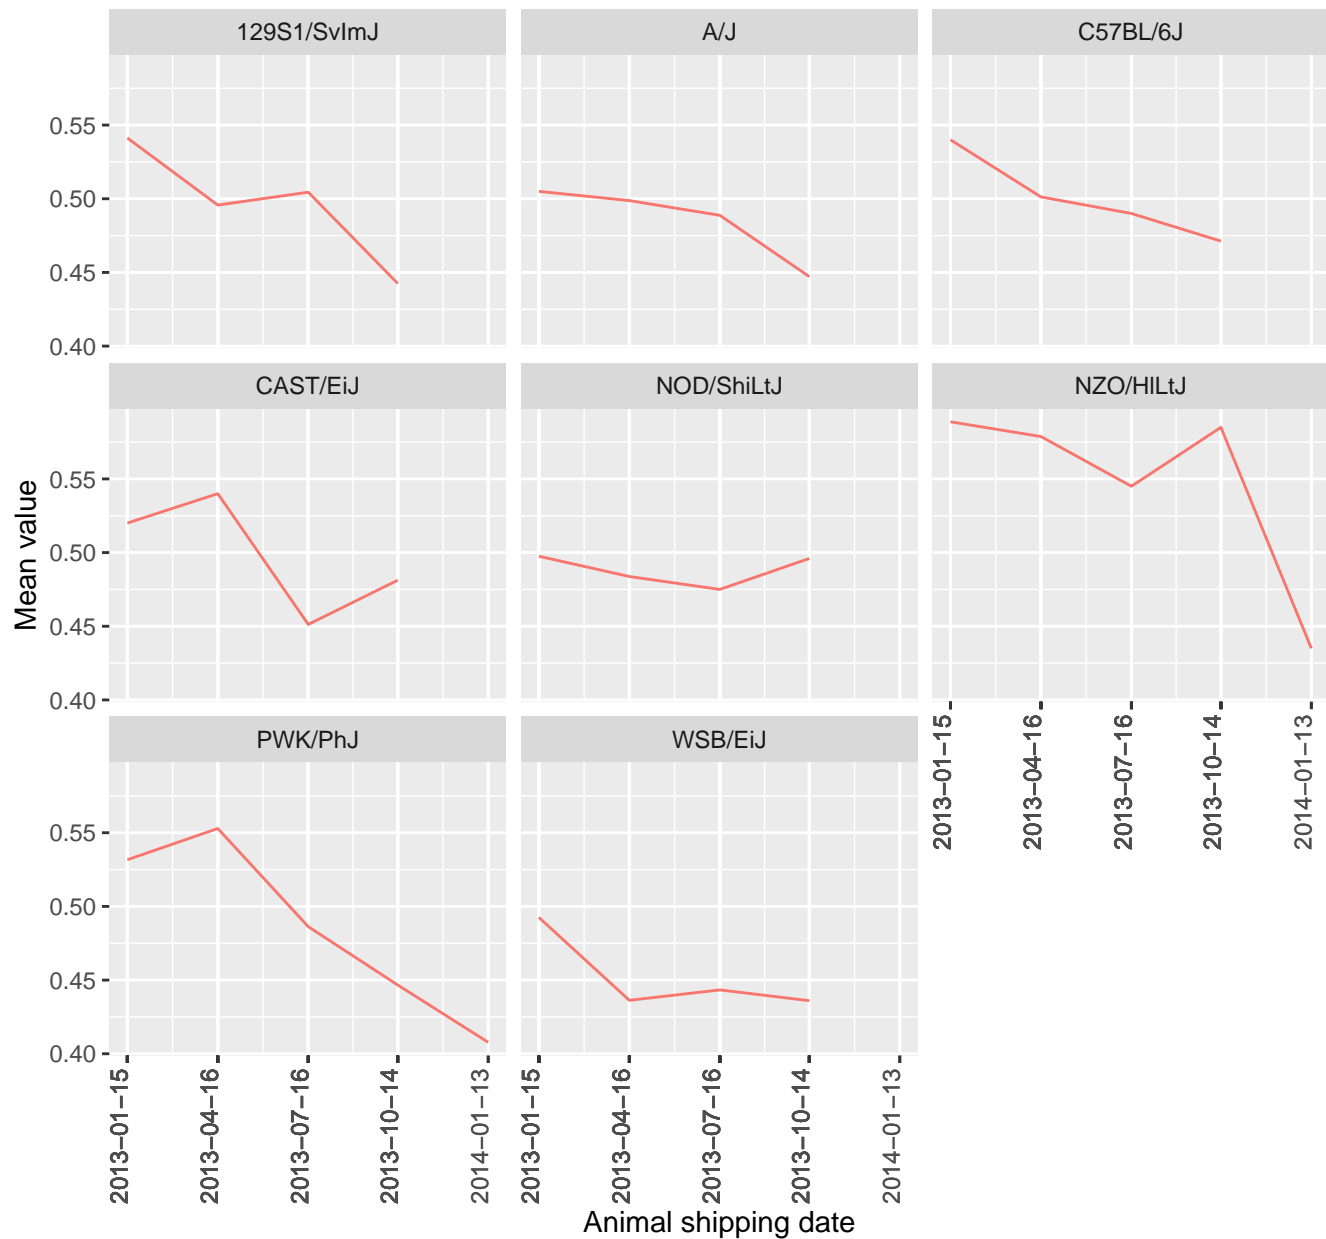

Procedure: GMC12  
Parameter: LV\_mass

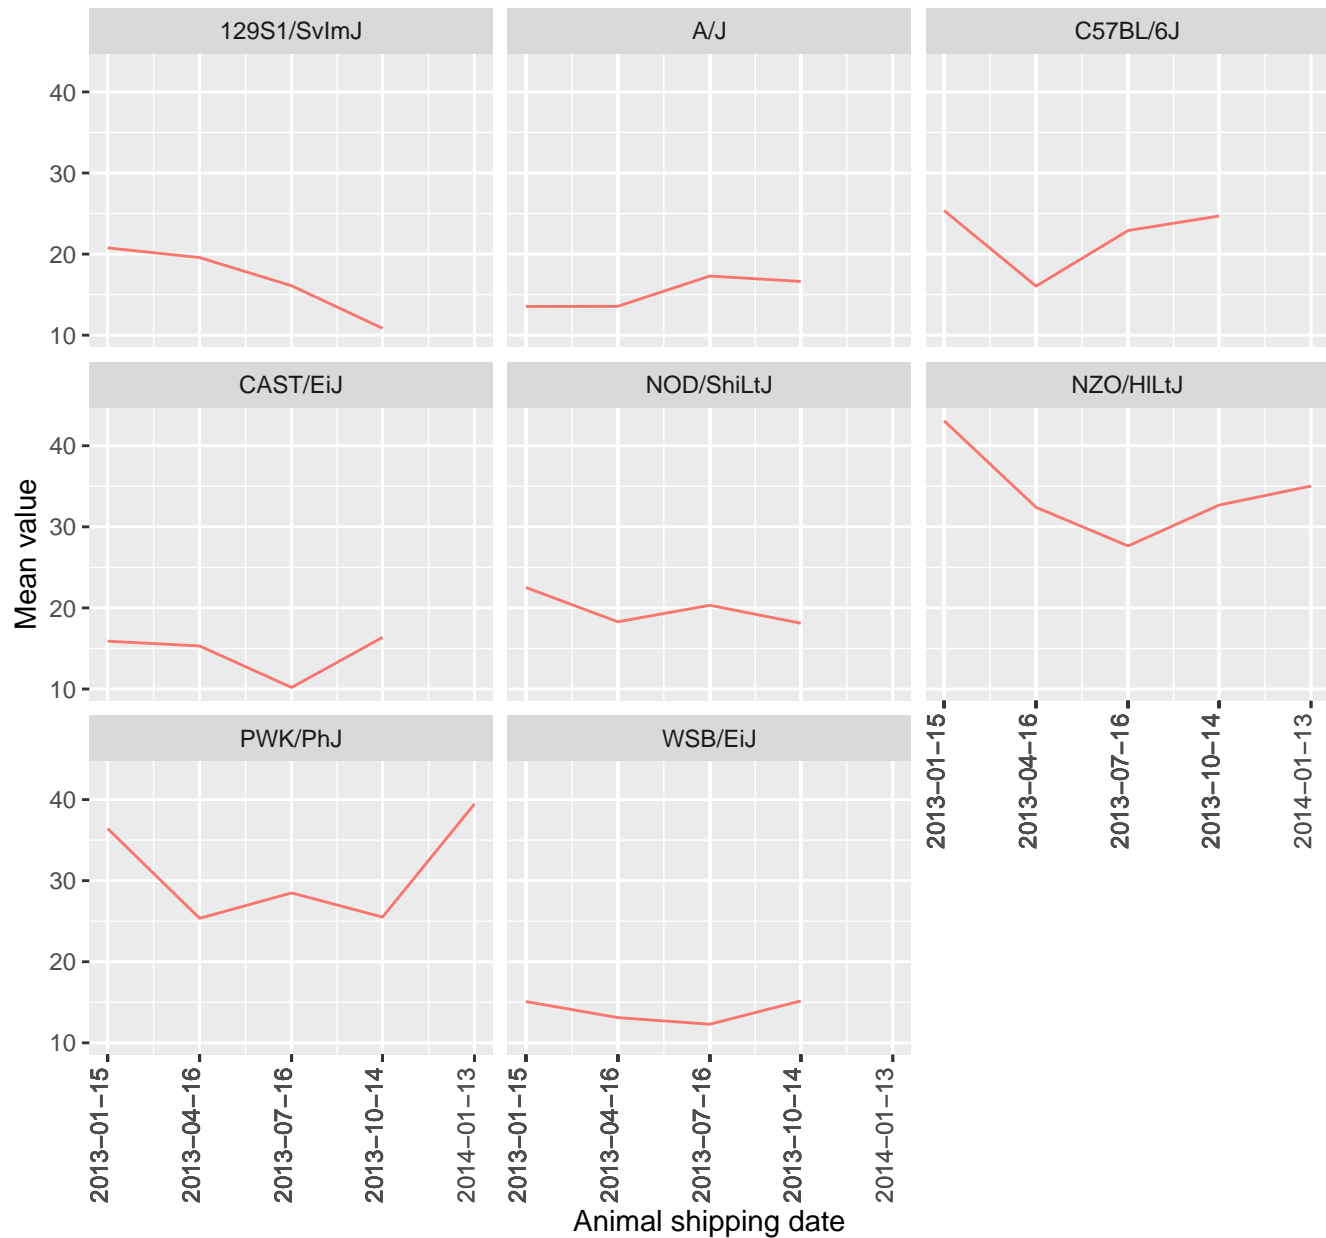

Procedure: GMC12  
Parameter: LVID\_diastole

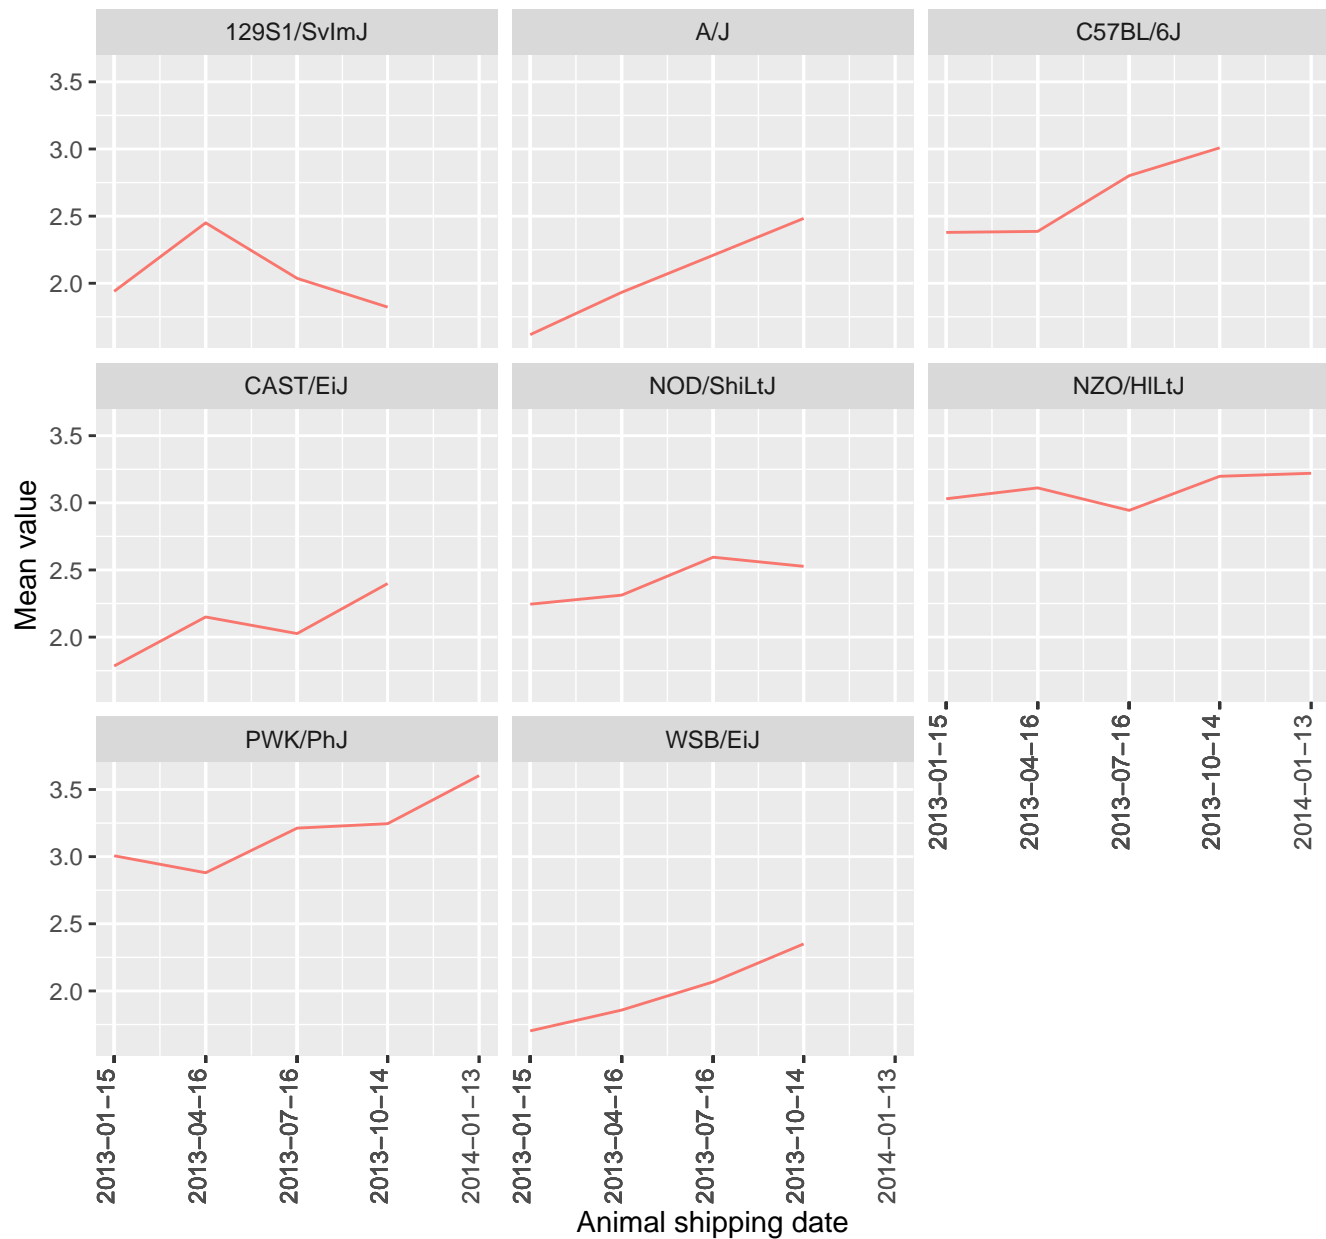

Procedure: GMC12  
Parameter: LVID\_systole

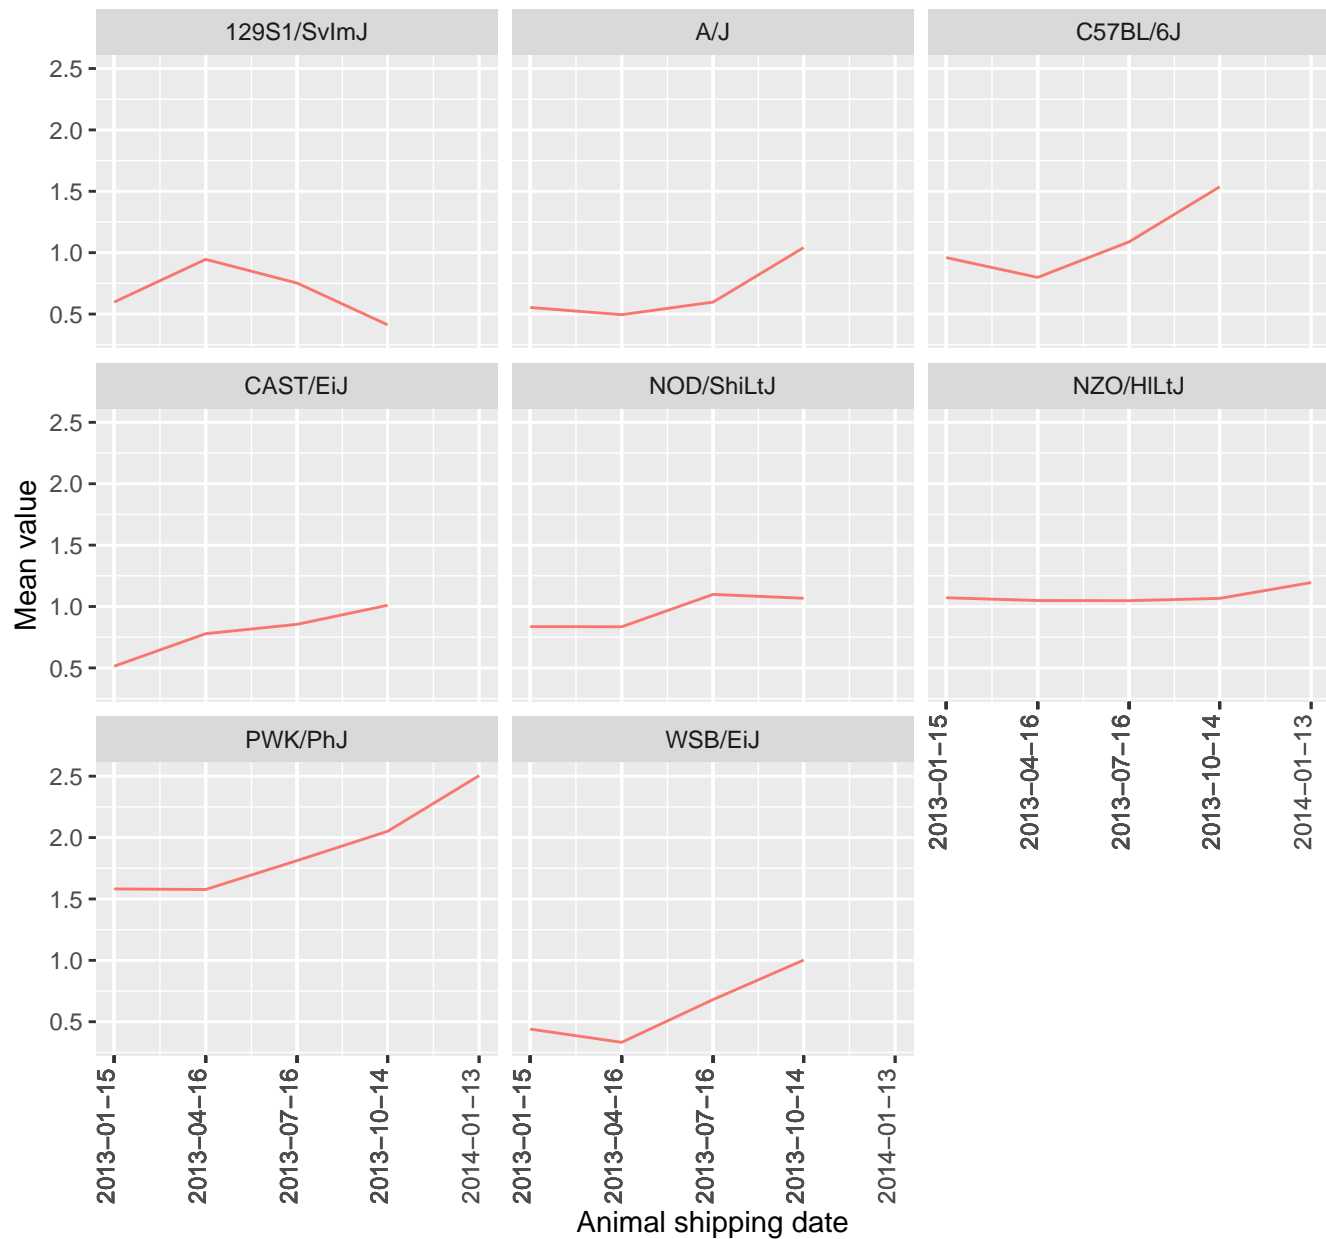

Procedure: GMC12  
Parameter: LVPW\_diastole

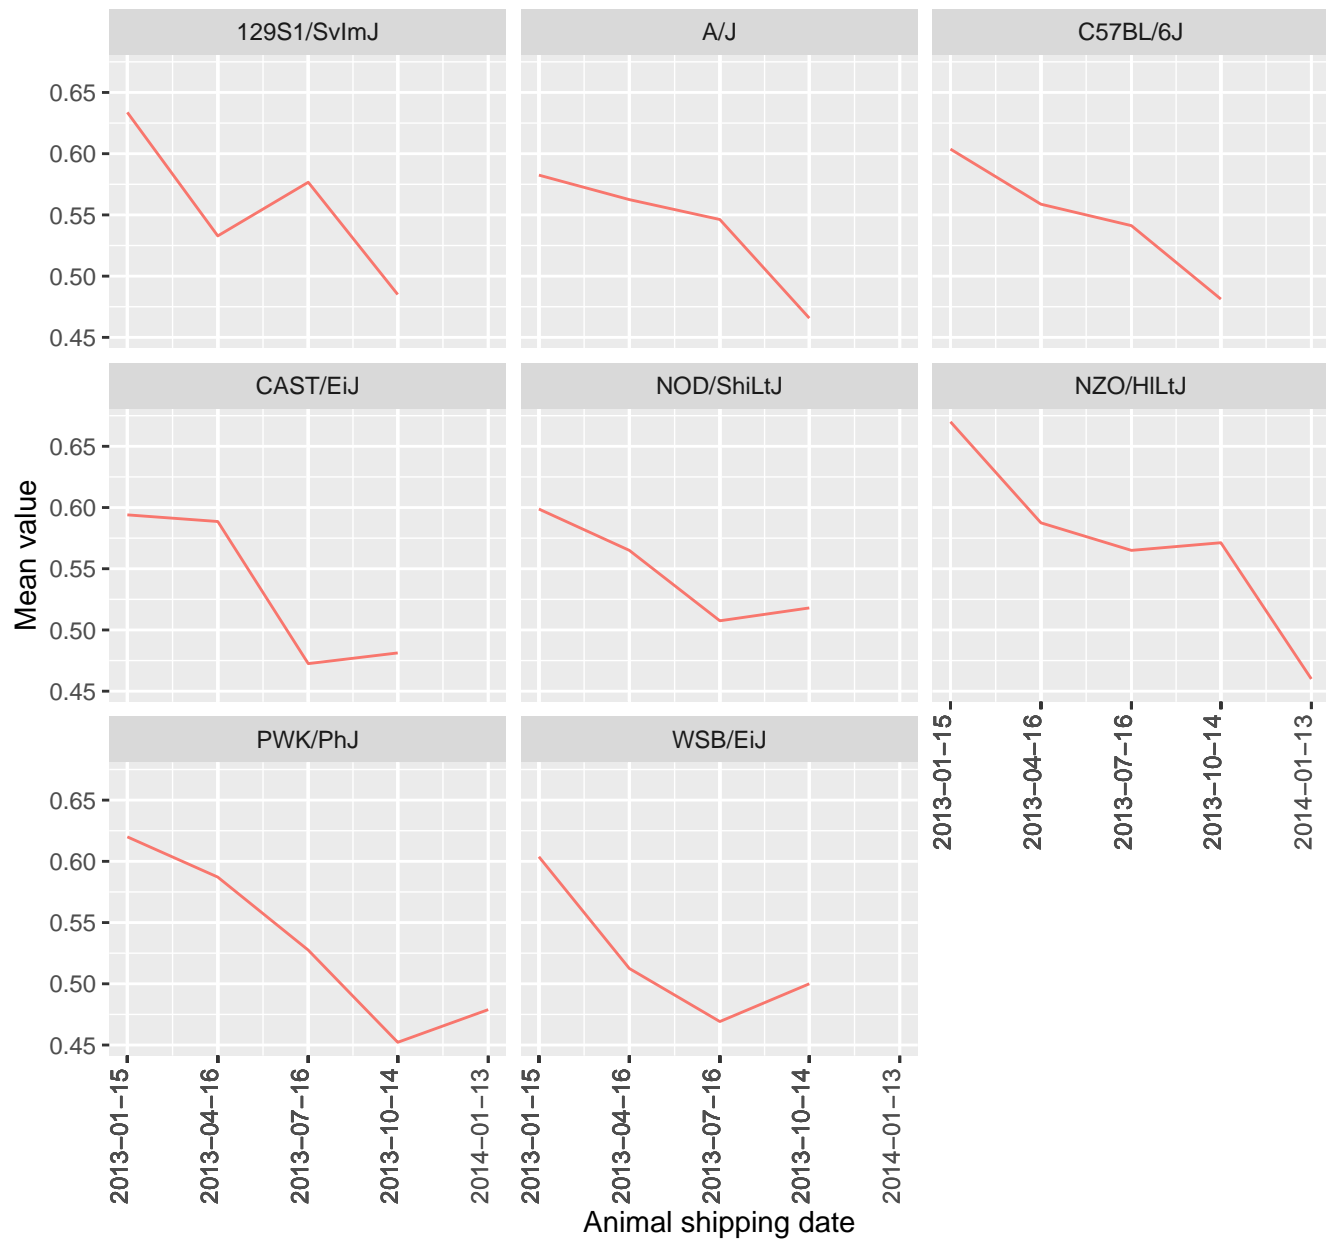



Procedure: GMC12  
Parameter: LVPW\_systole

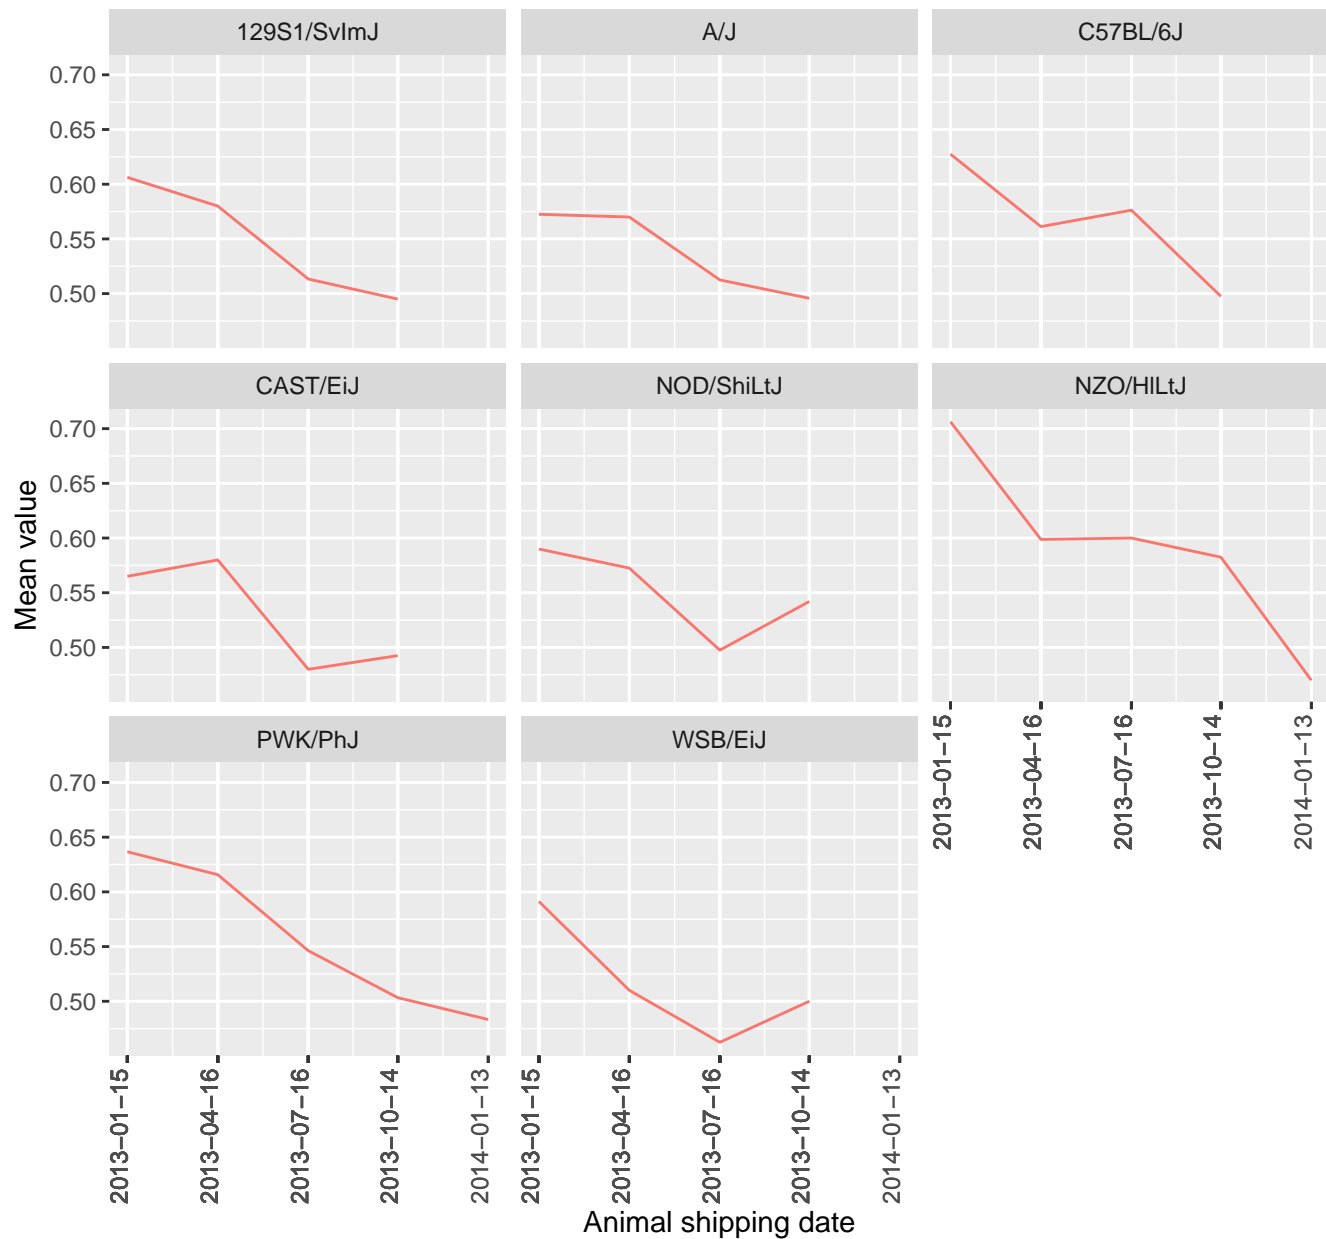

Procedure: GMC12  
Parameter: resp\_rate

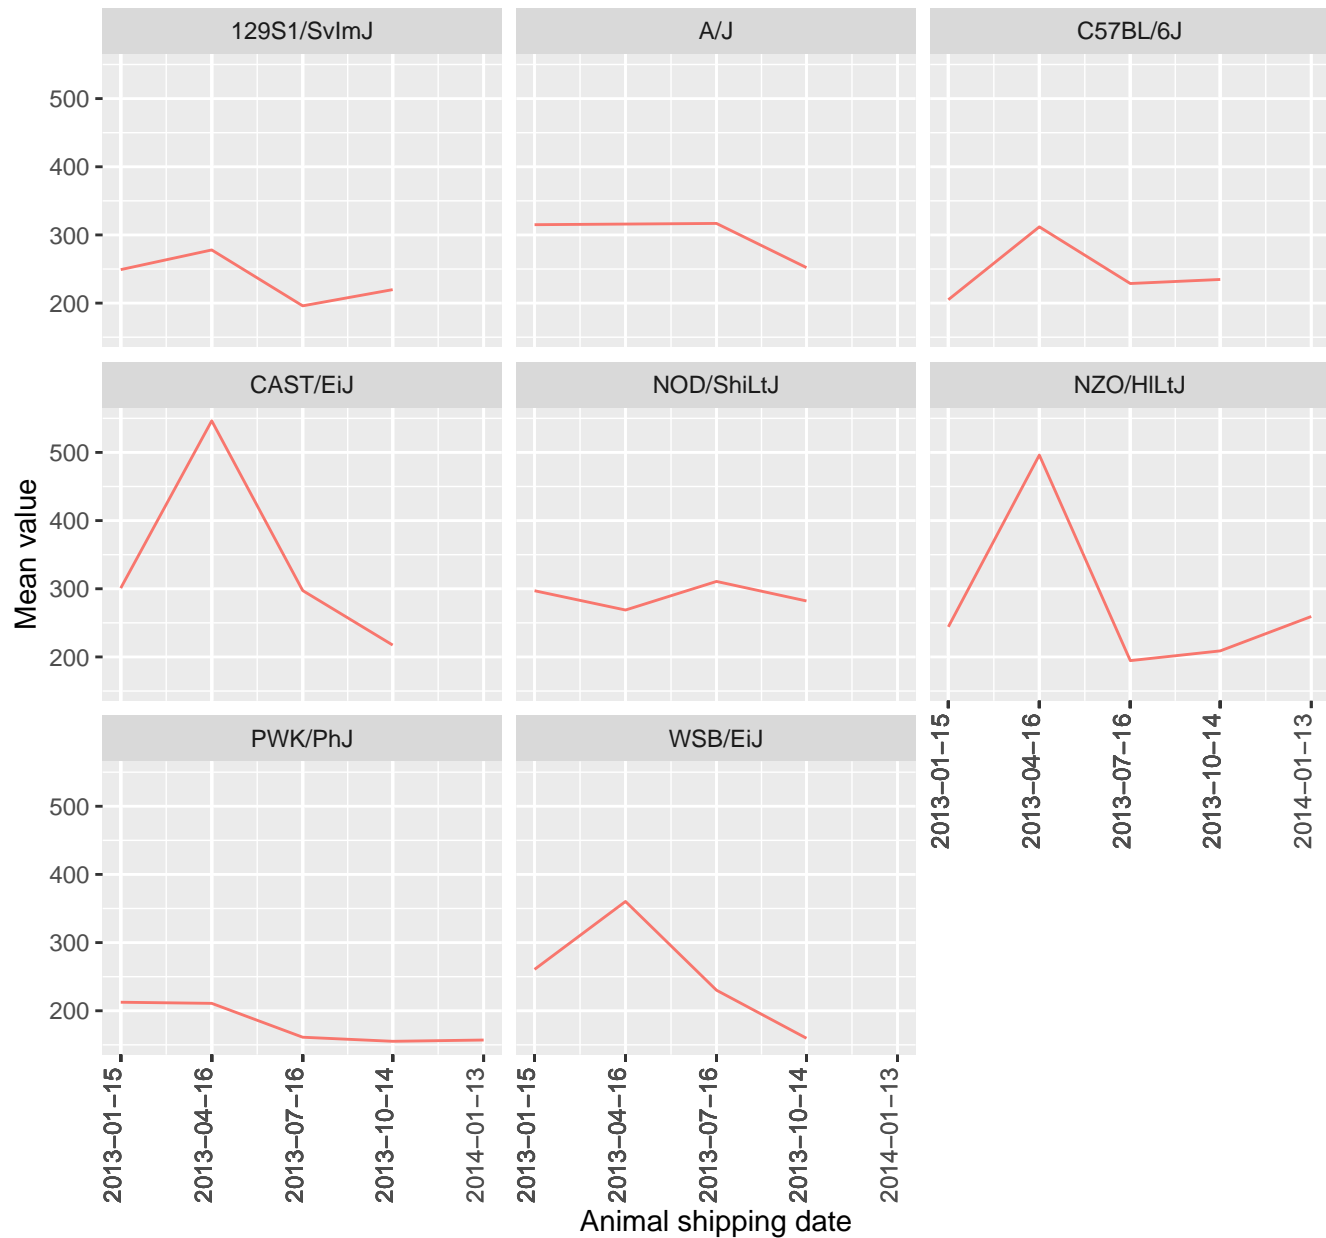

Procedure: GMC12  
Parameter: stroke\_vol

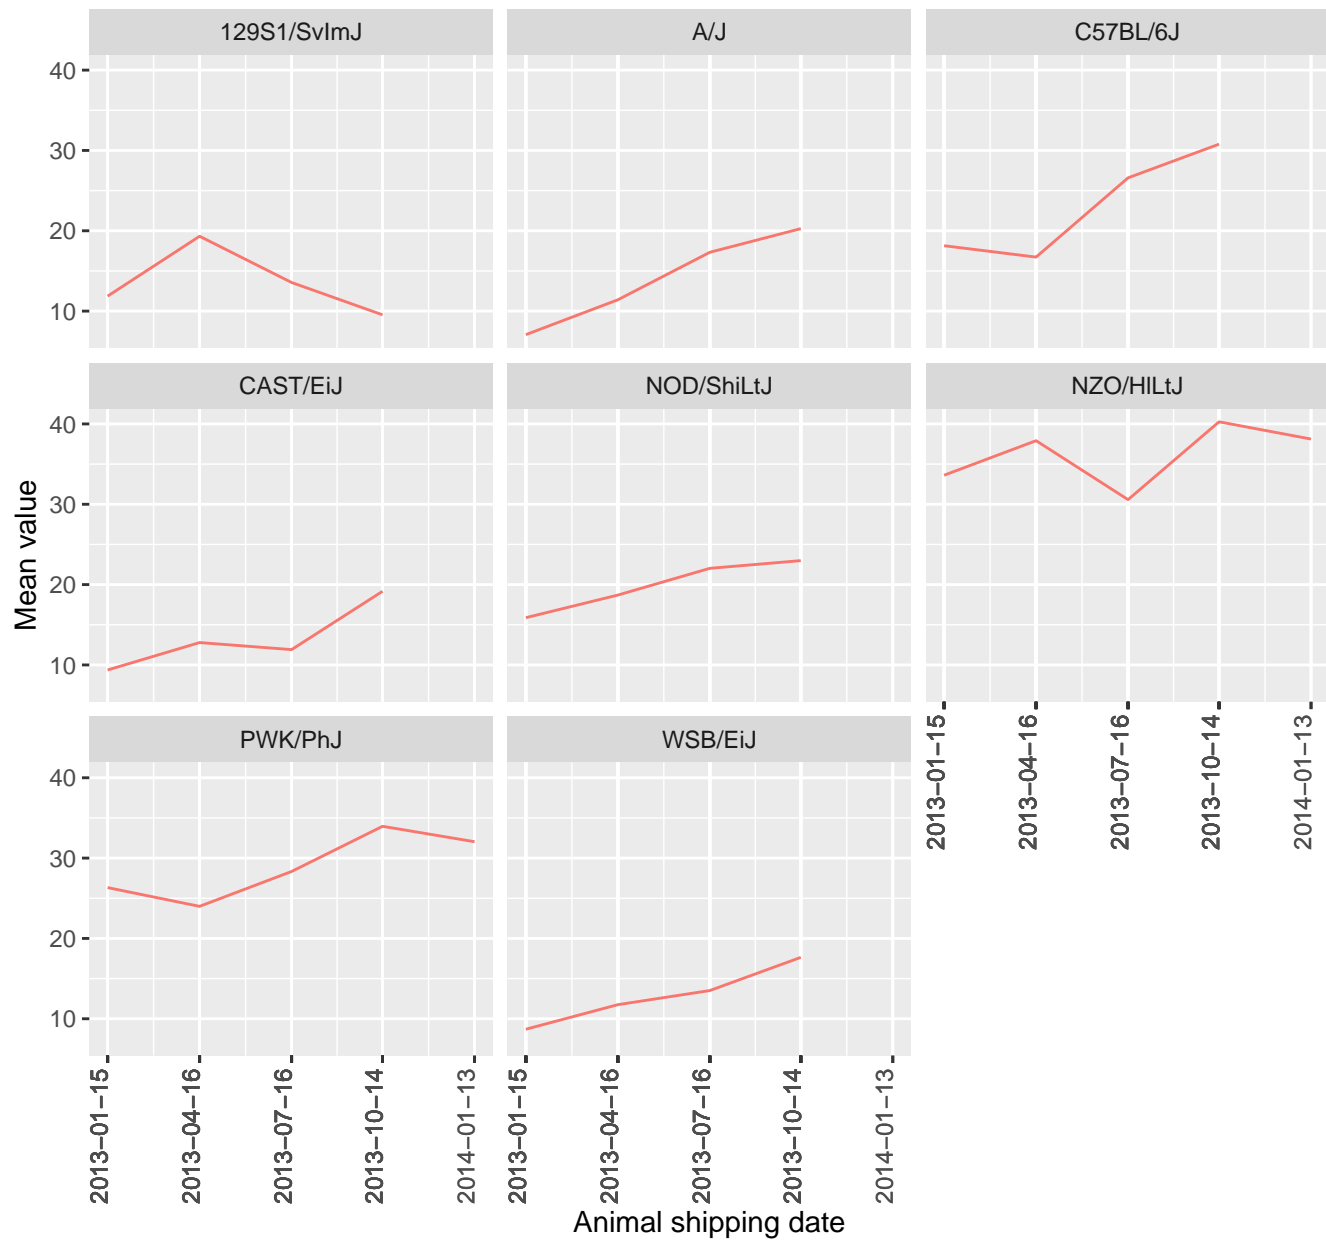

Procedure: GMC13

Parameter: HR

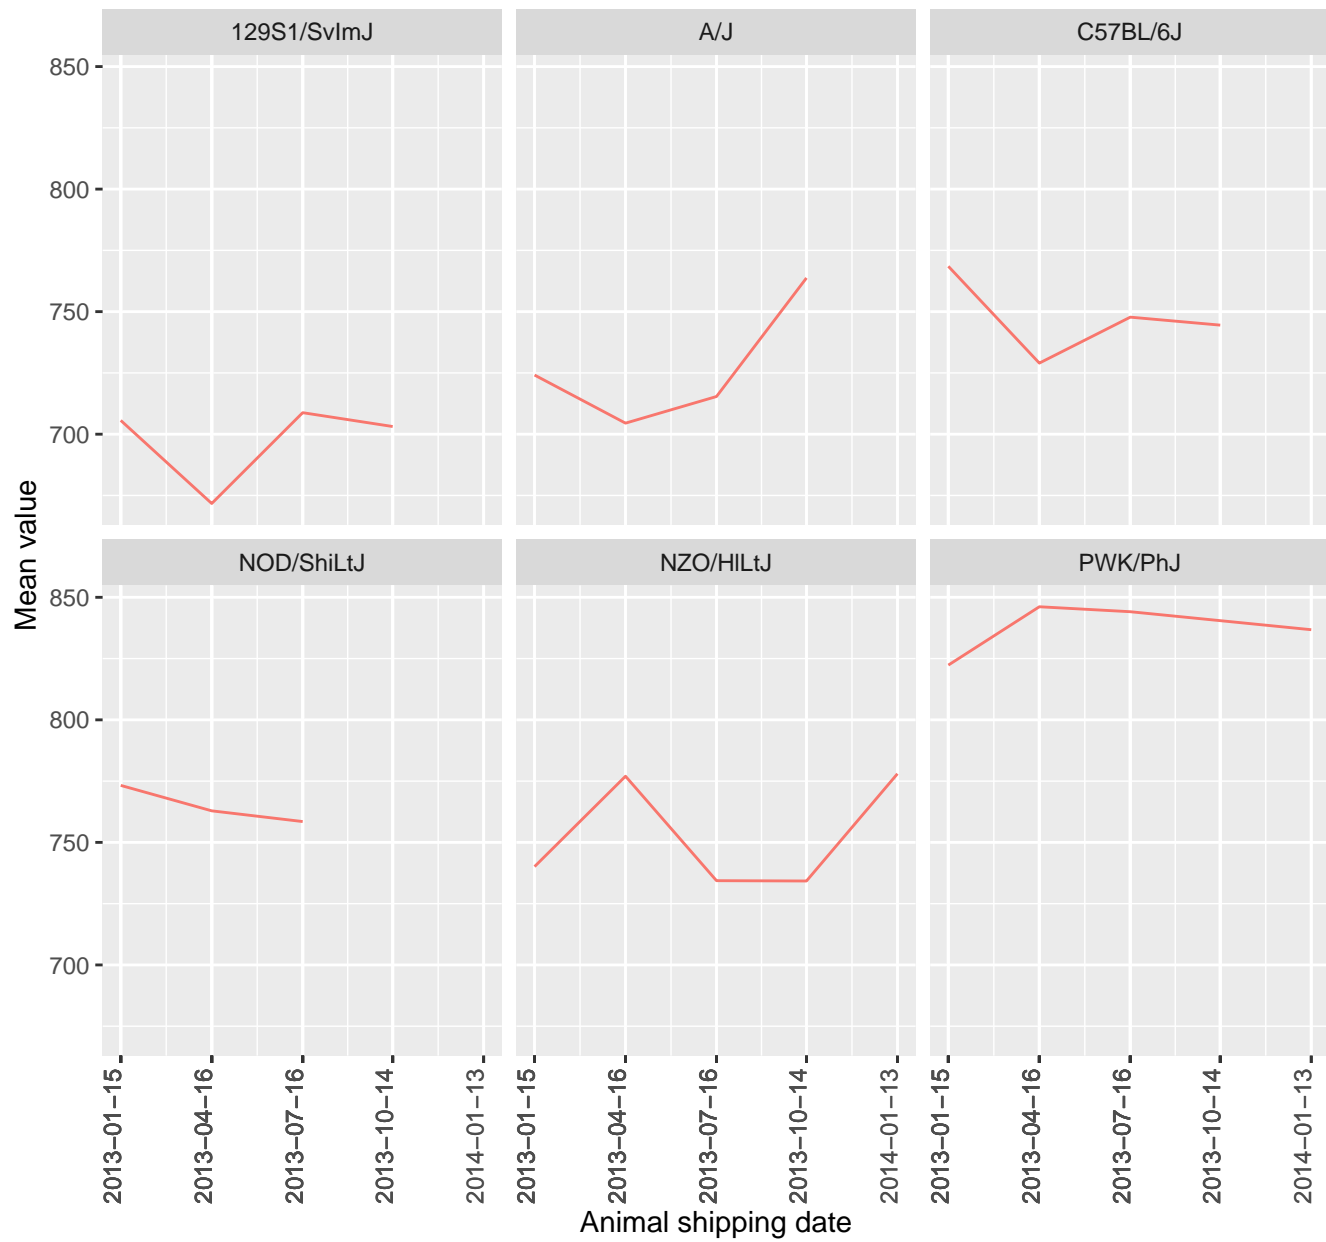

Procedure: GMC13  
Parameter: HR\_CV

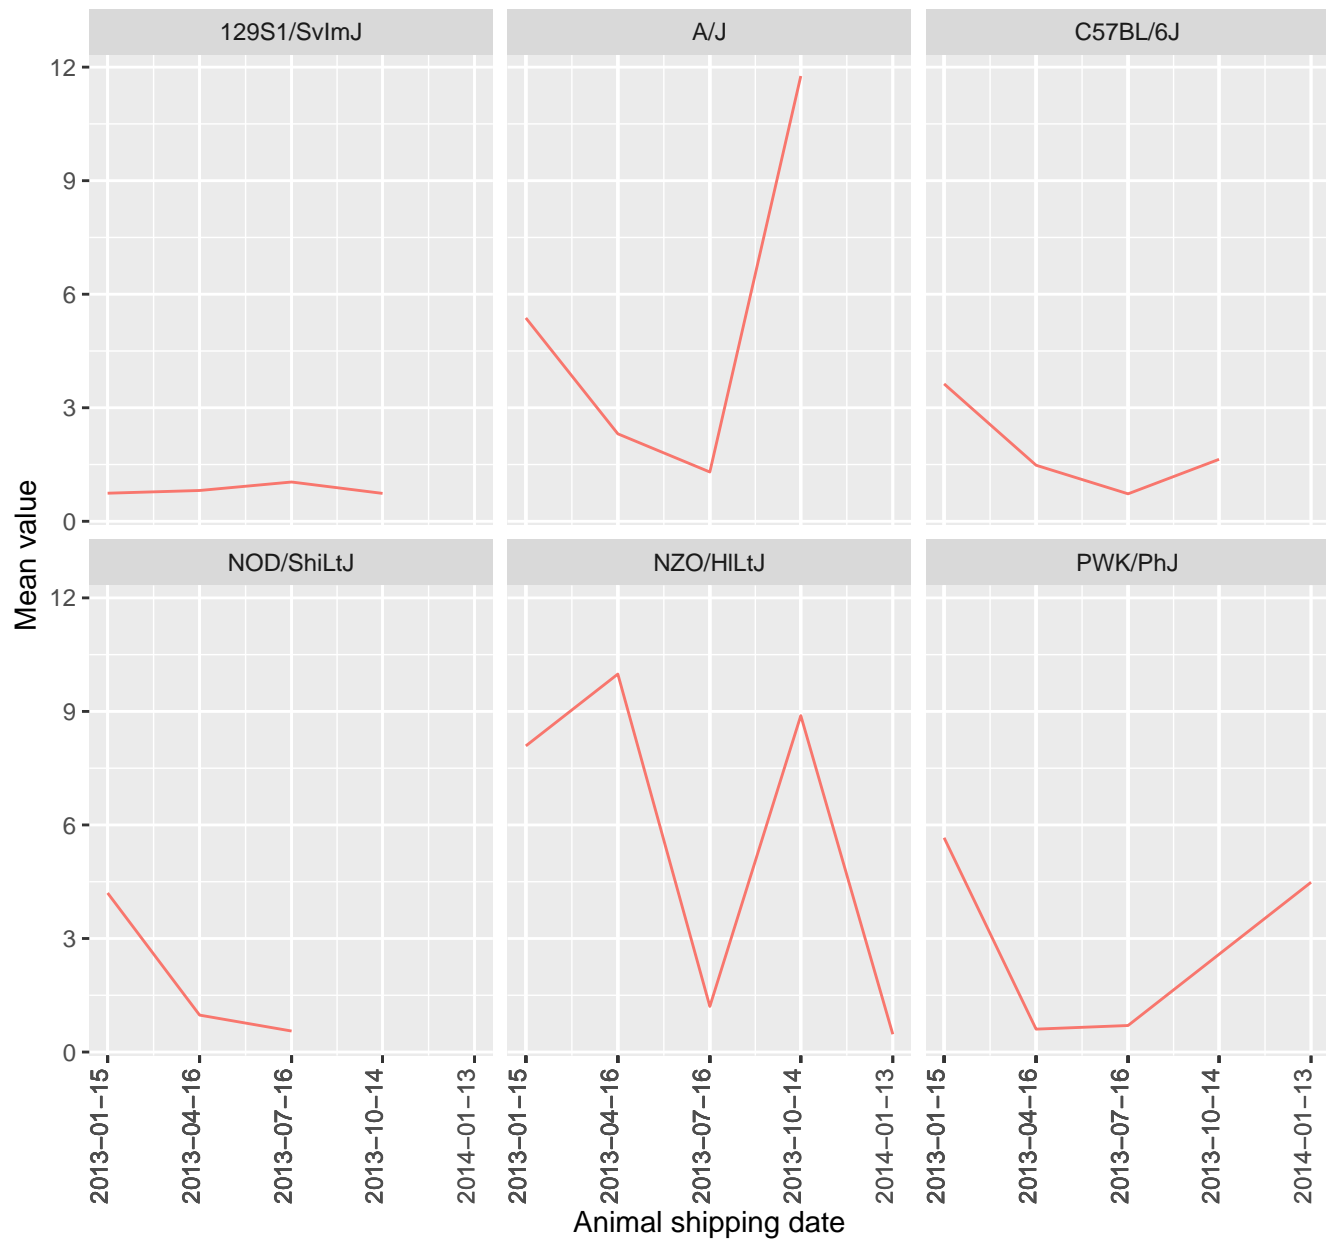

Procedure: GMC13

Parameter: HR\_V

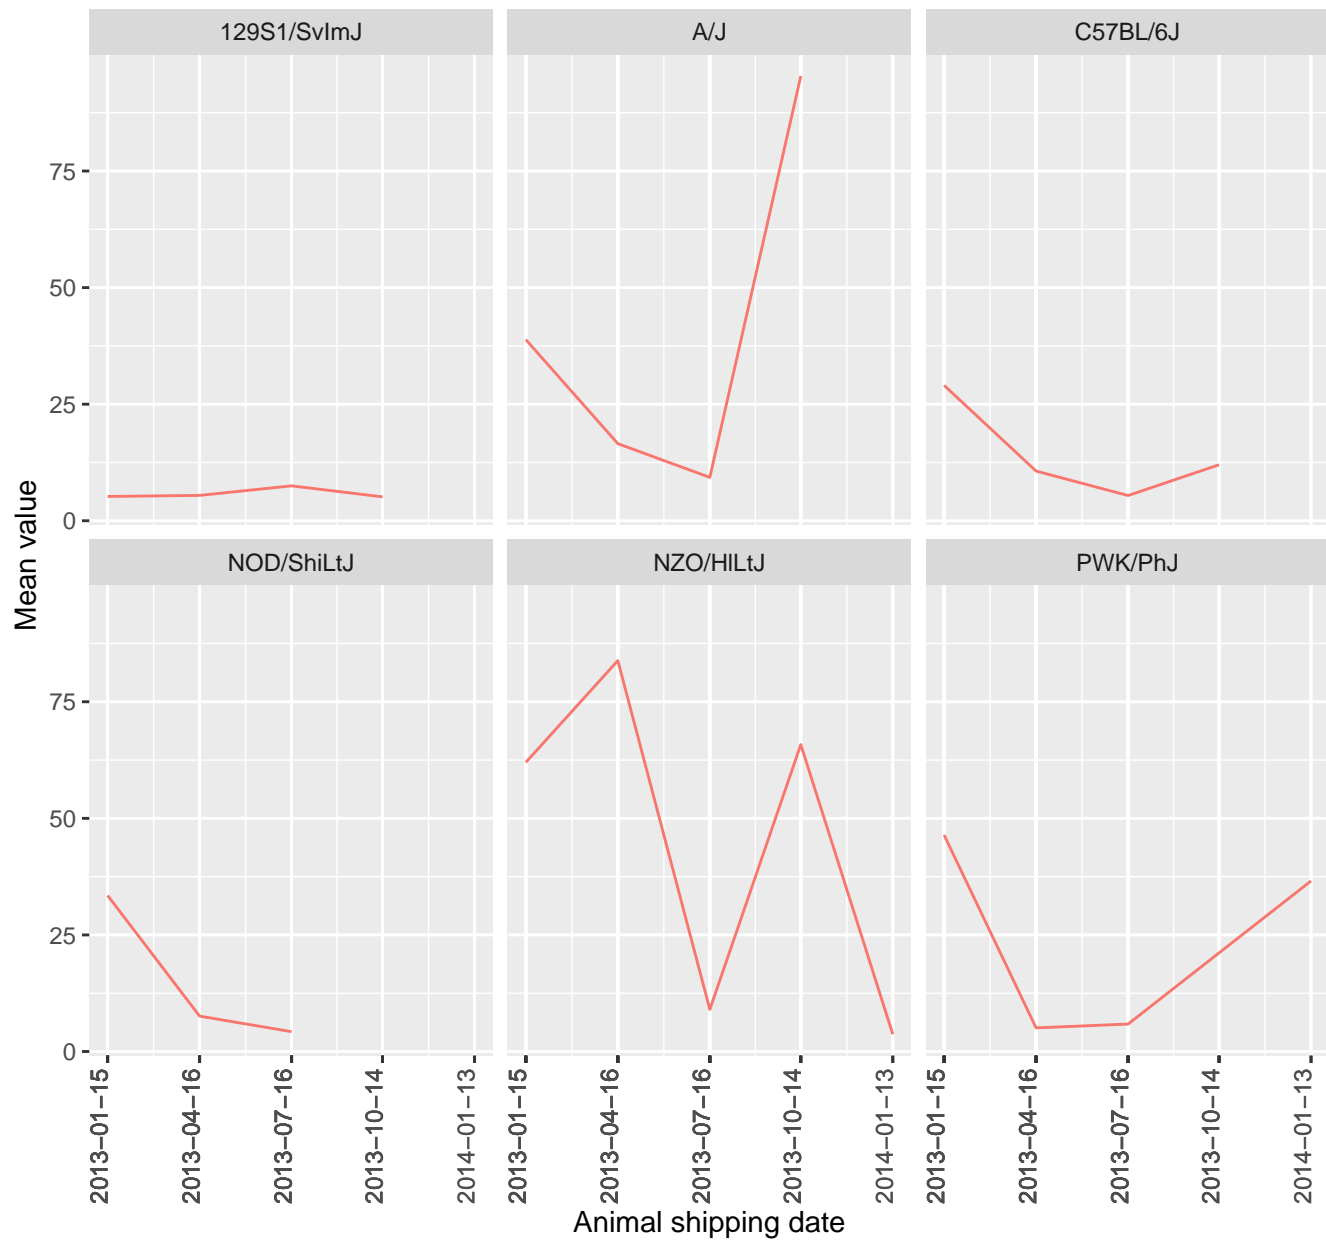

Procedure: GMC13  
Parameter: num\_ECG\_signals

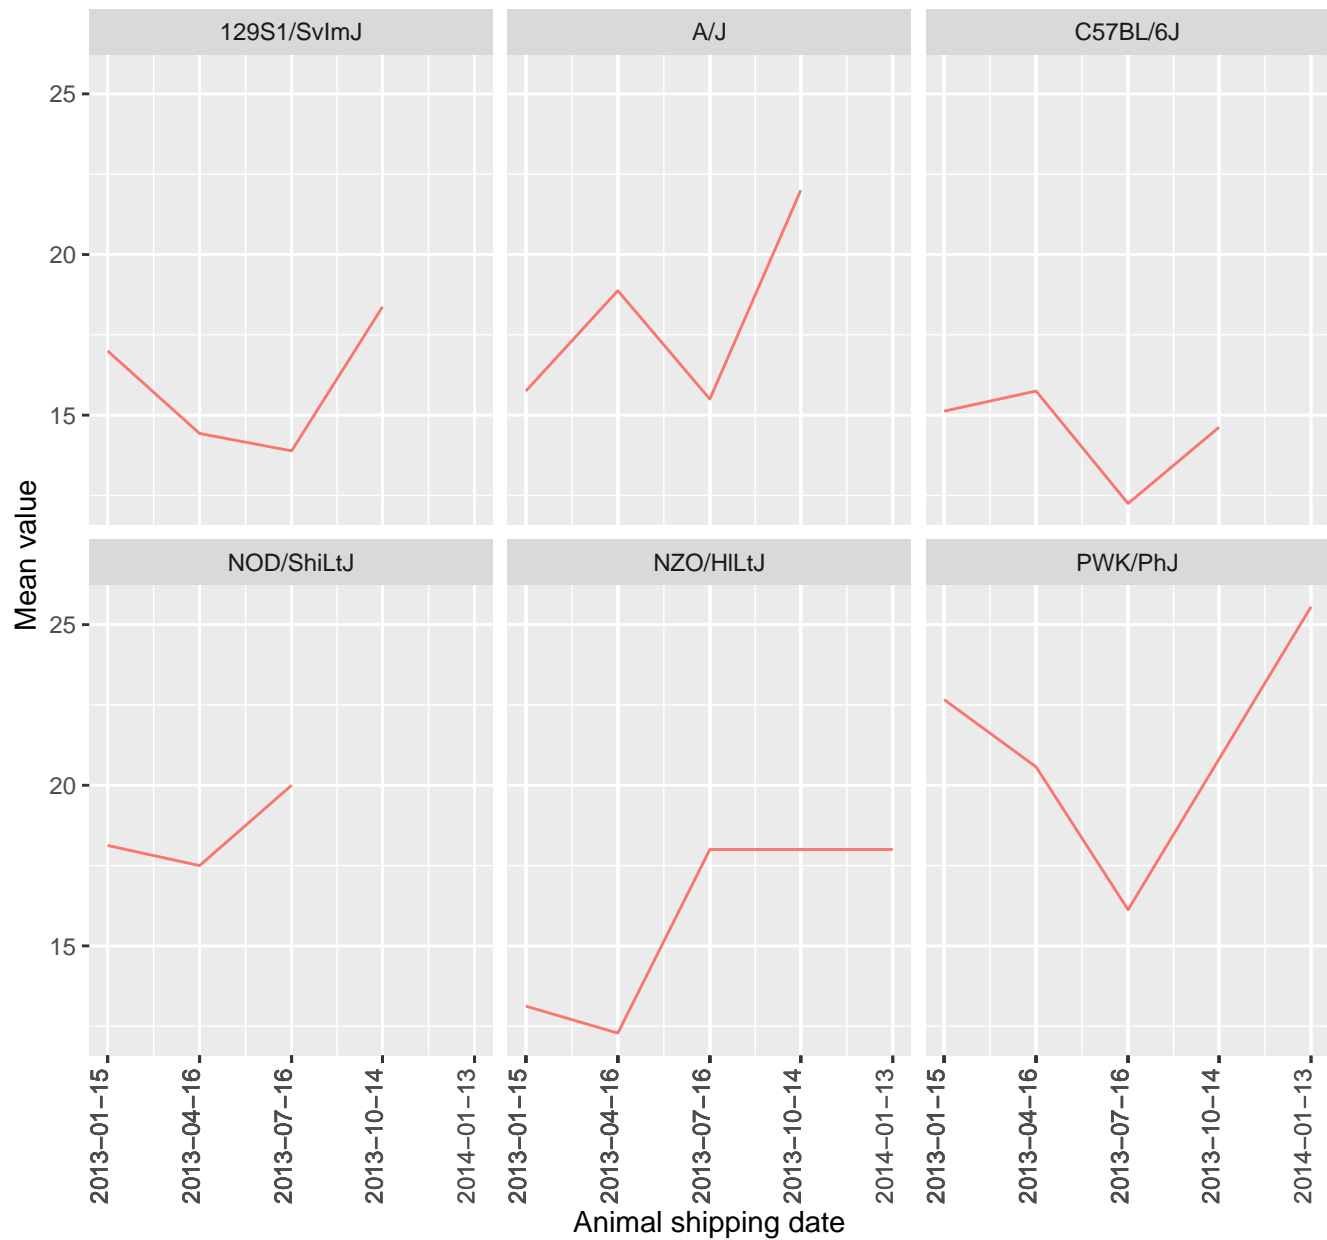

Procedure: GMC13  
Parameter: pNN50

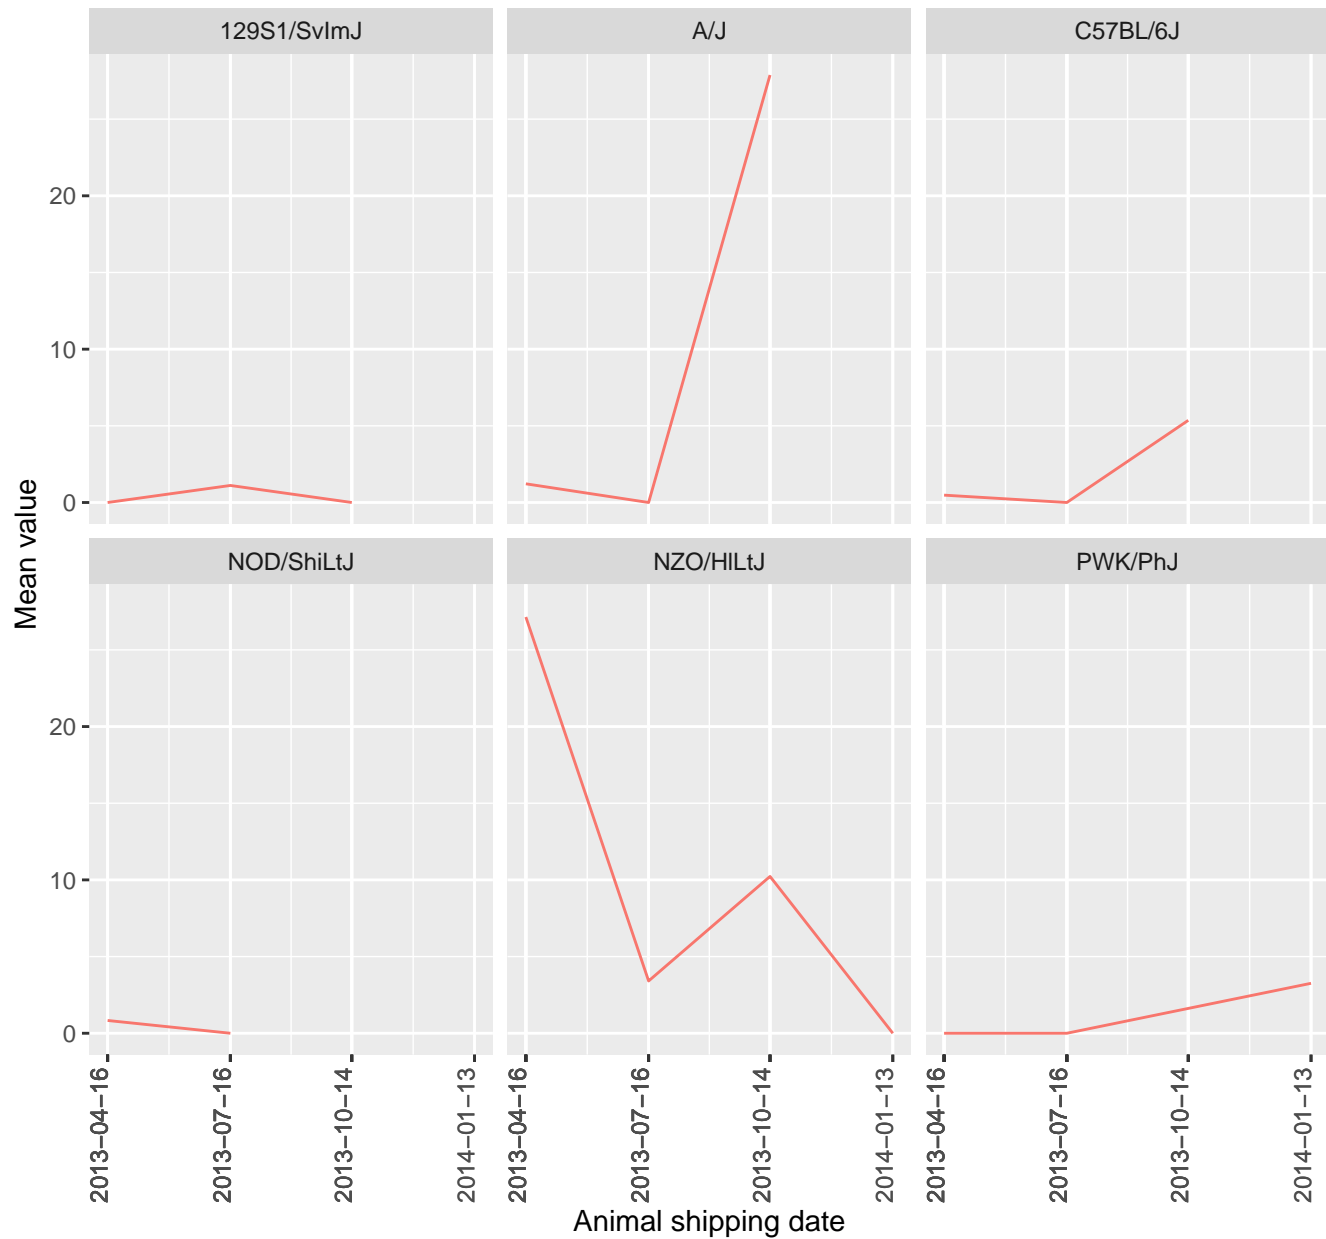



Procedure: GMC13  
Parameter: PQ

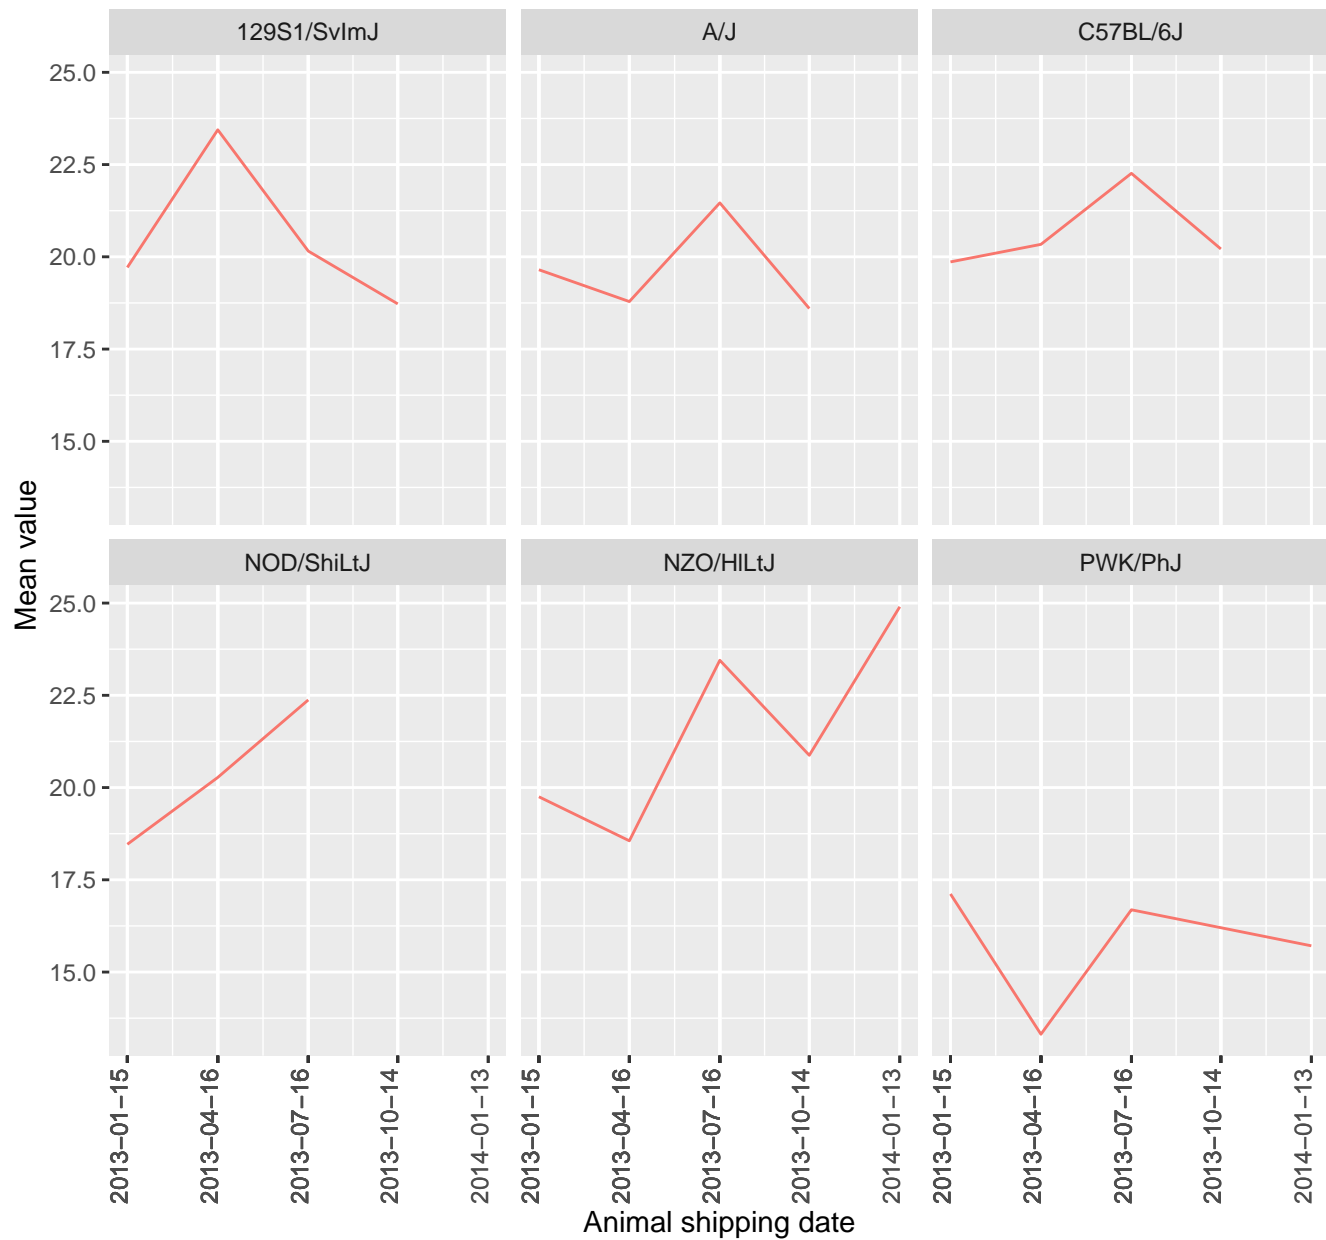

Procedure: GMC13

Parameter: PR

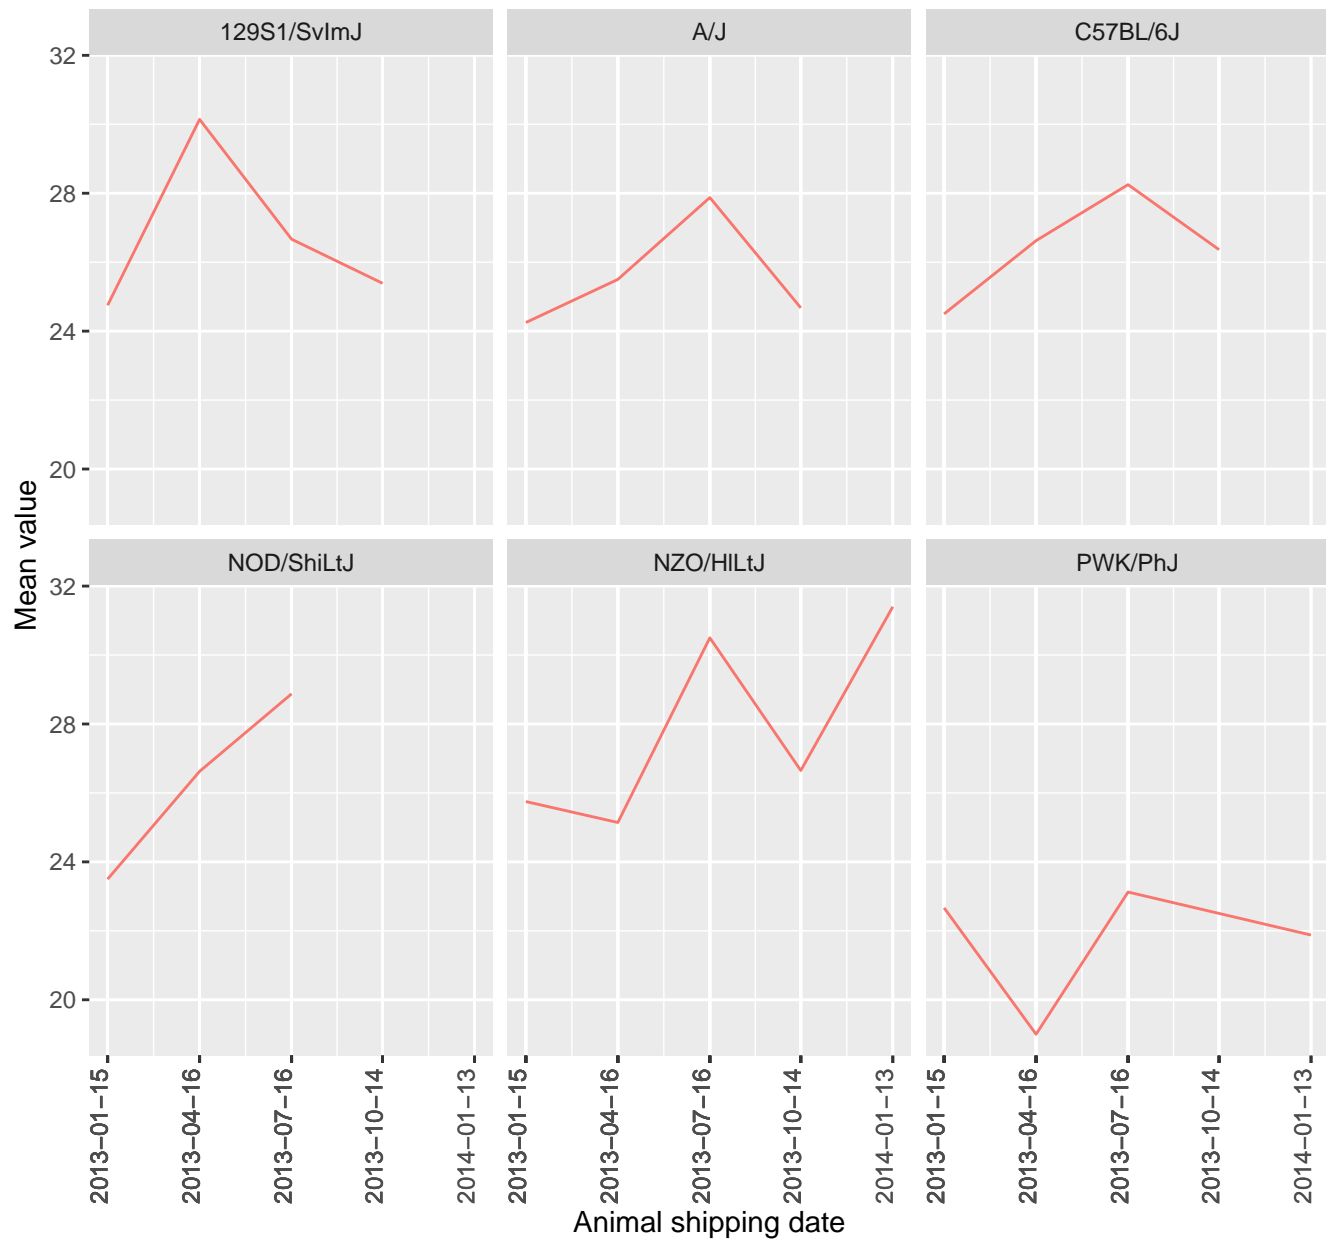

Procedure: GMC13

Parameter: QRS

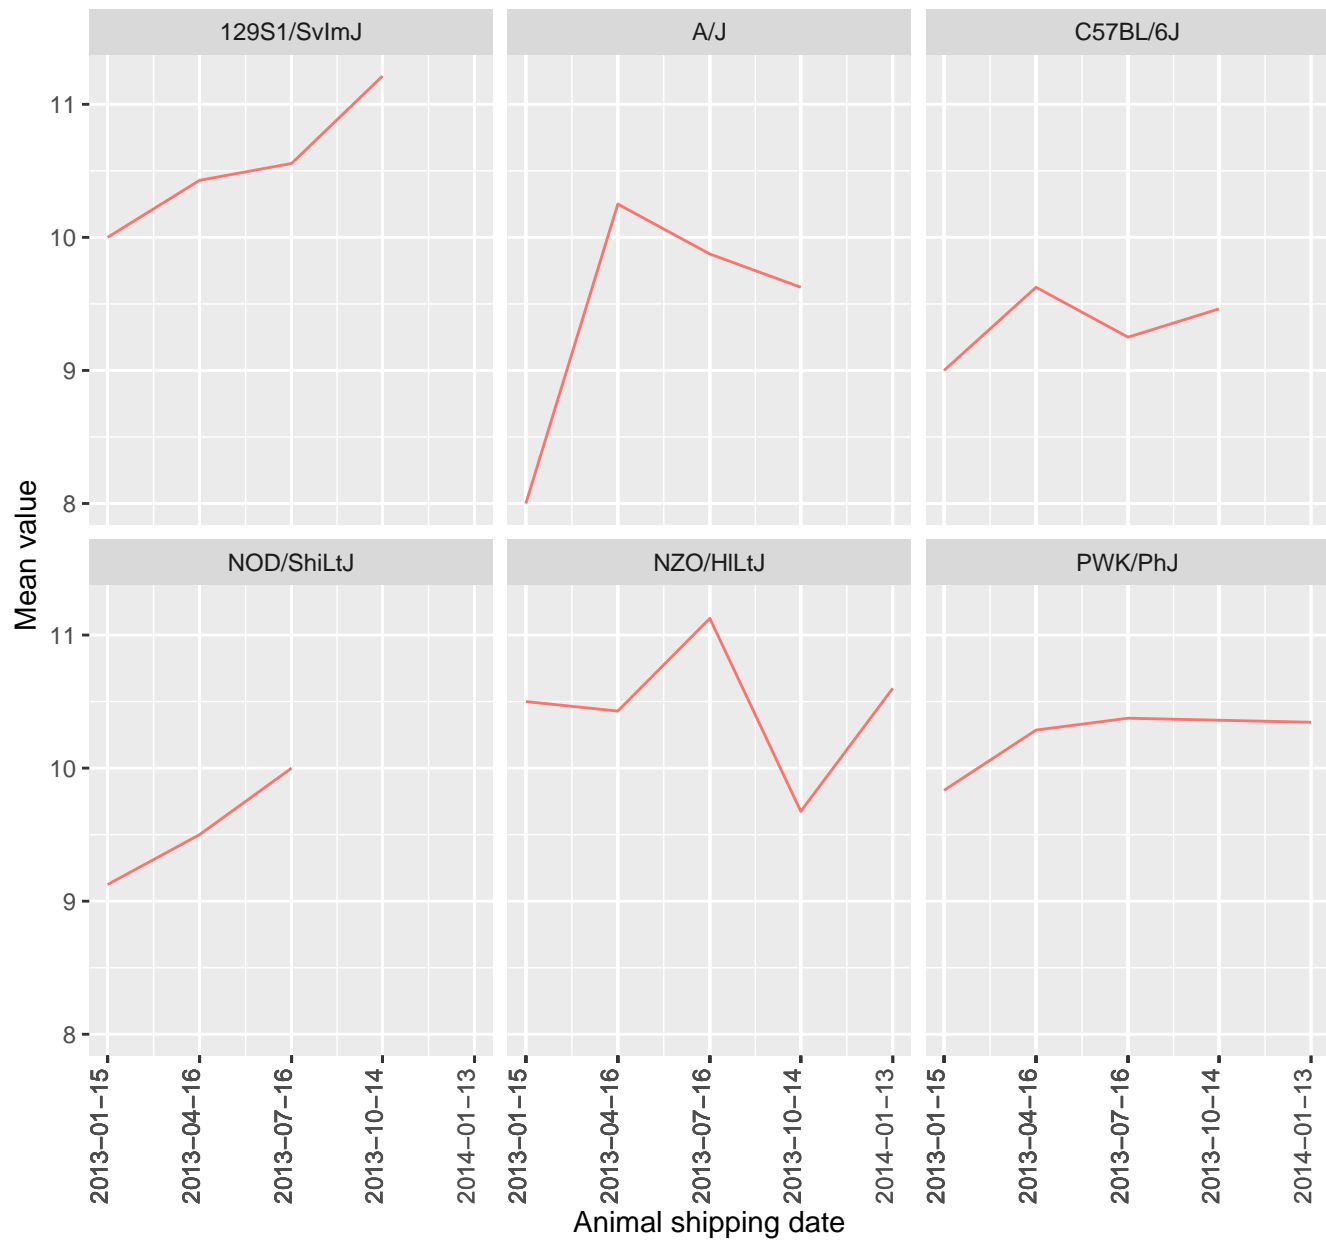

Procedure: GMC13  
Parameter: QT

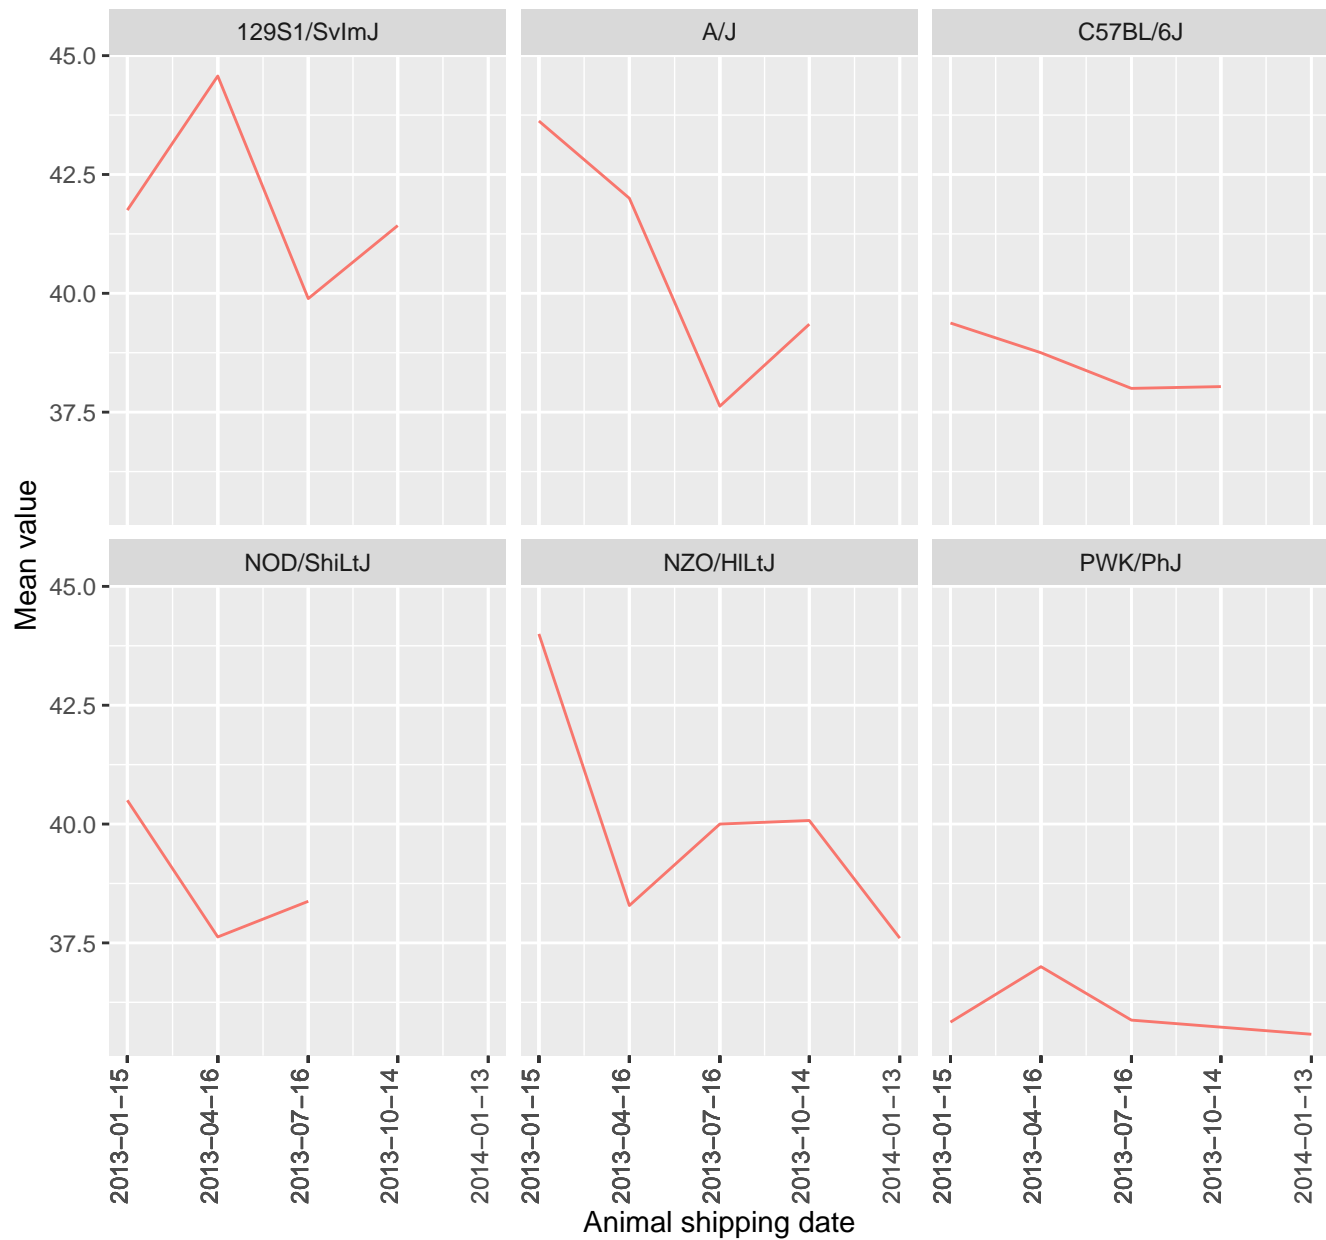

Procedure: GMC13  
Parameter: QT\_dispersion

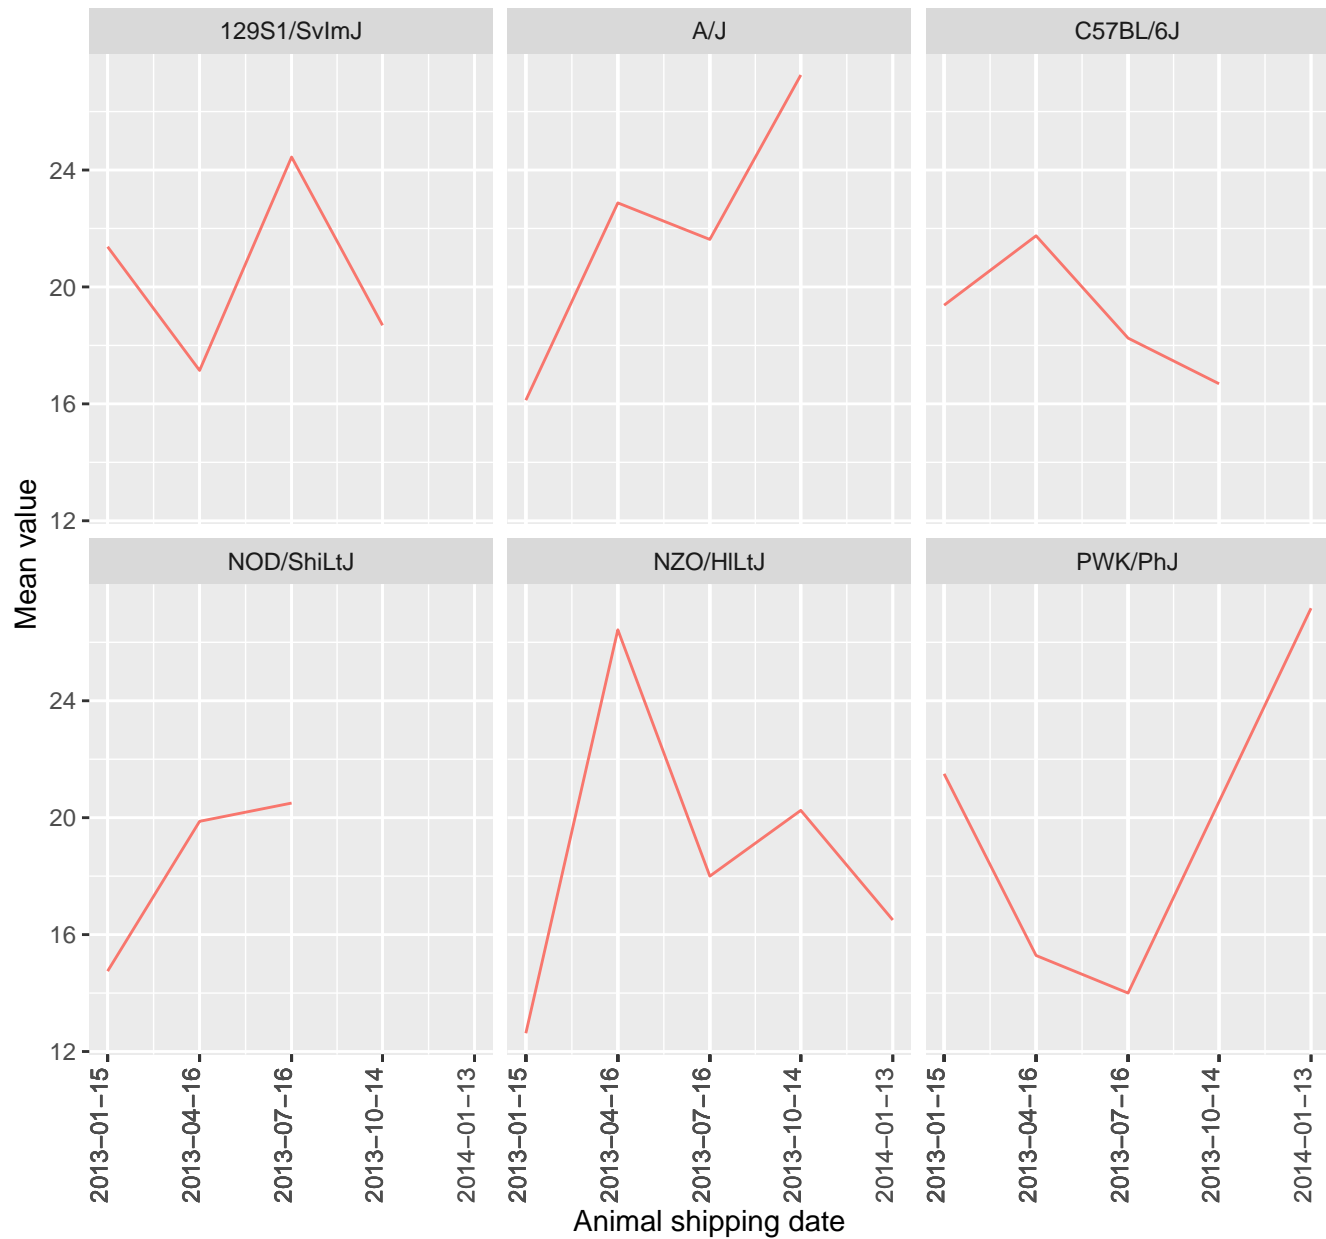

Procedure: GMC13

Parameter: QTc

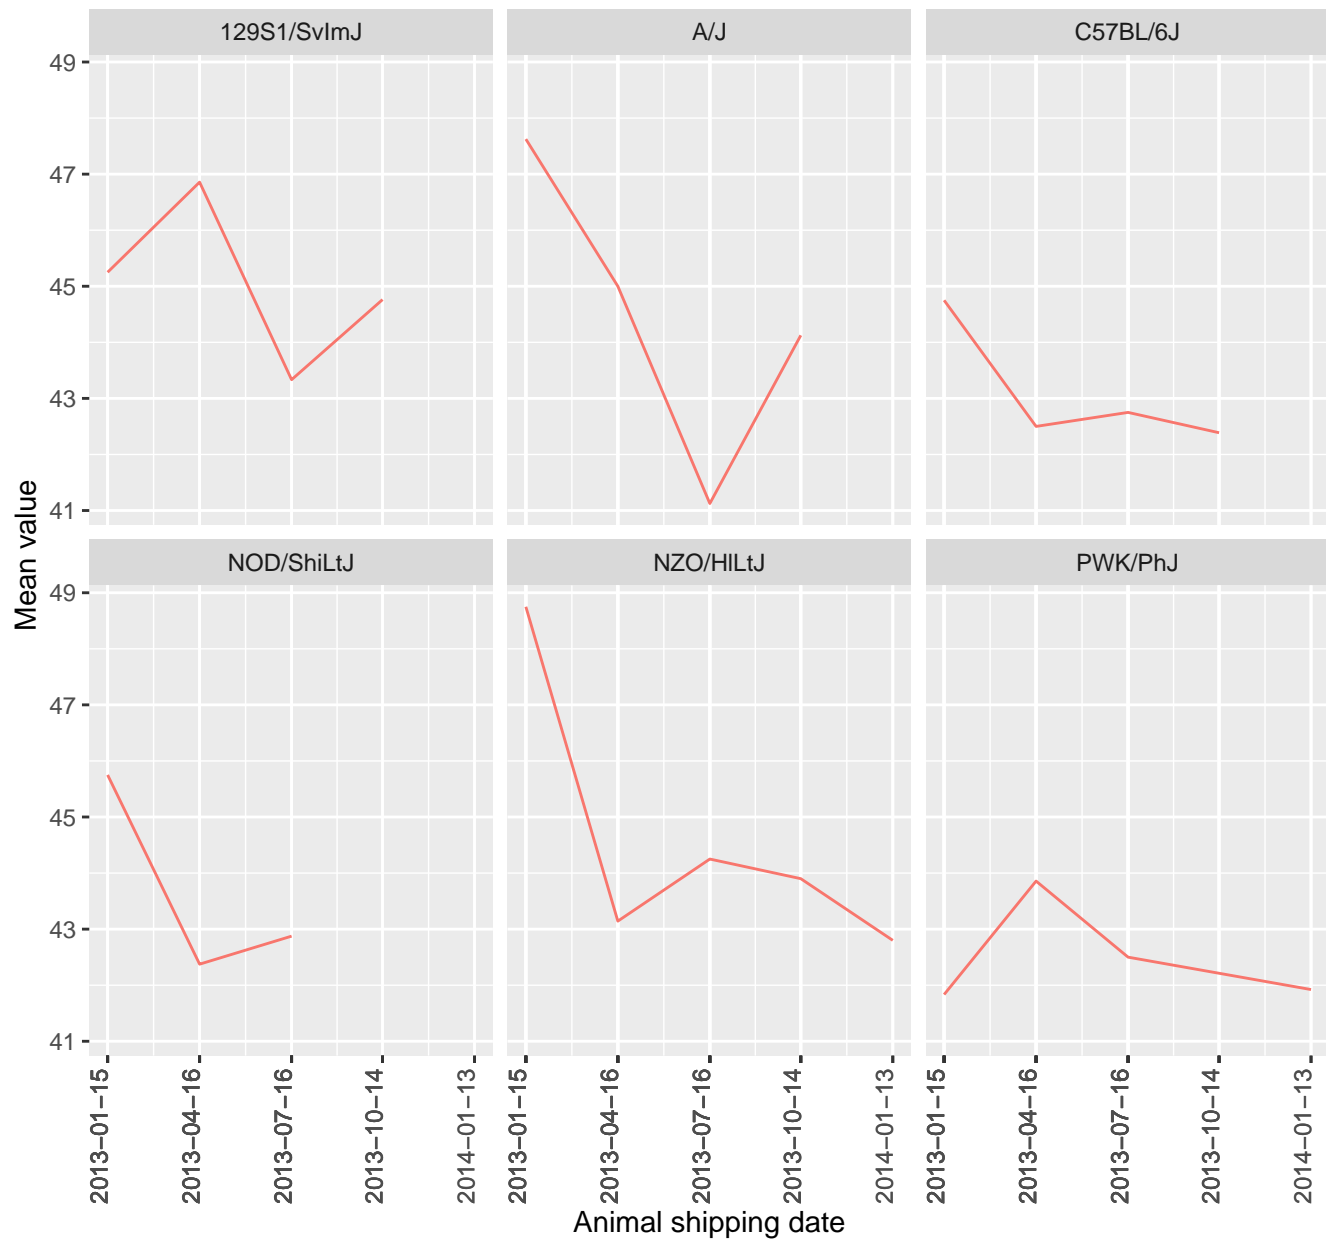

Procedure: GMC13  
Parameter: QTc\_dispersion

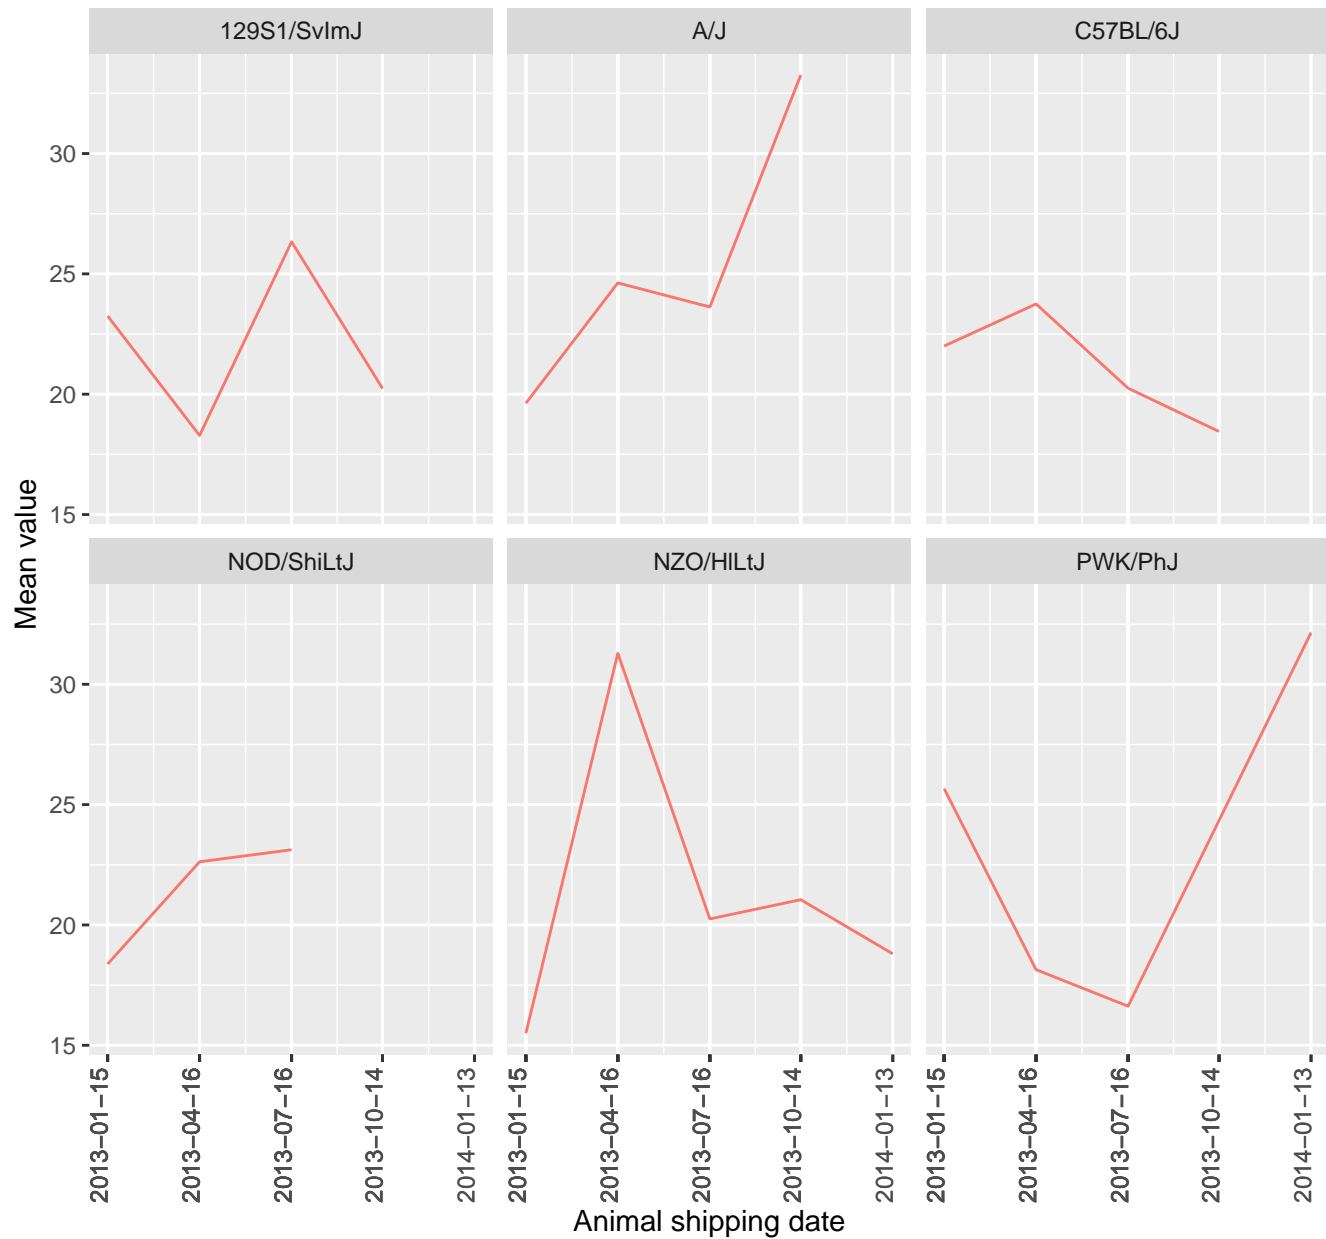

Procedure: GMC13  
Parameter: R\_amplitude

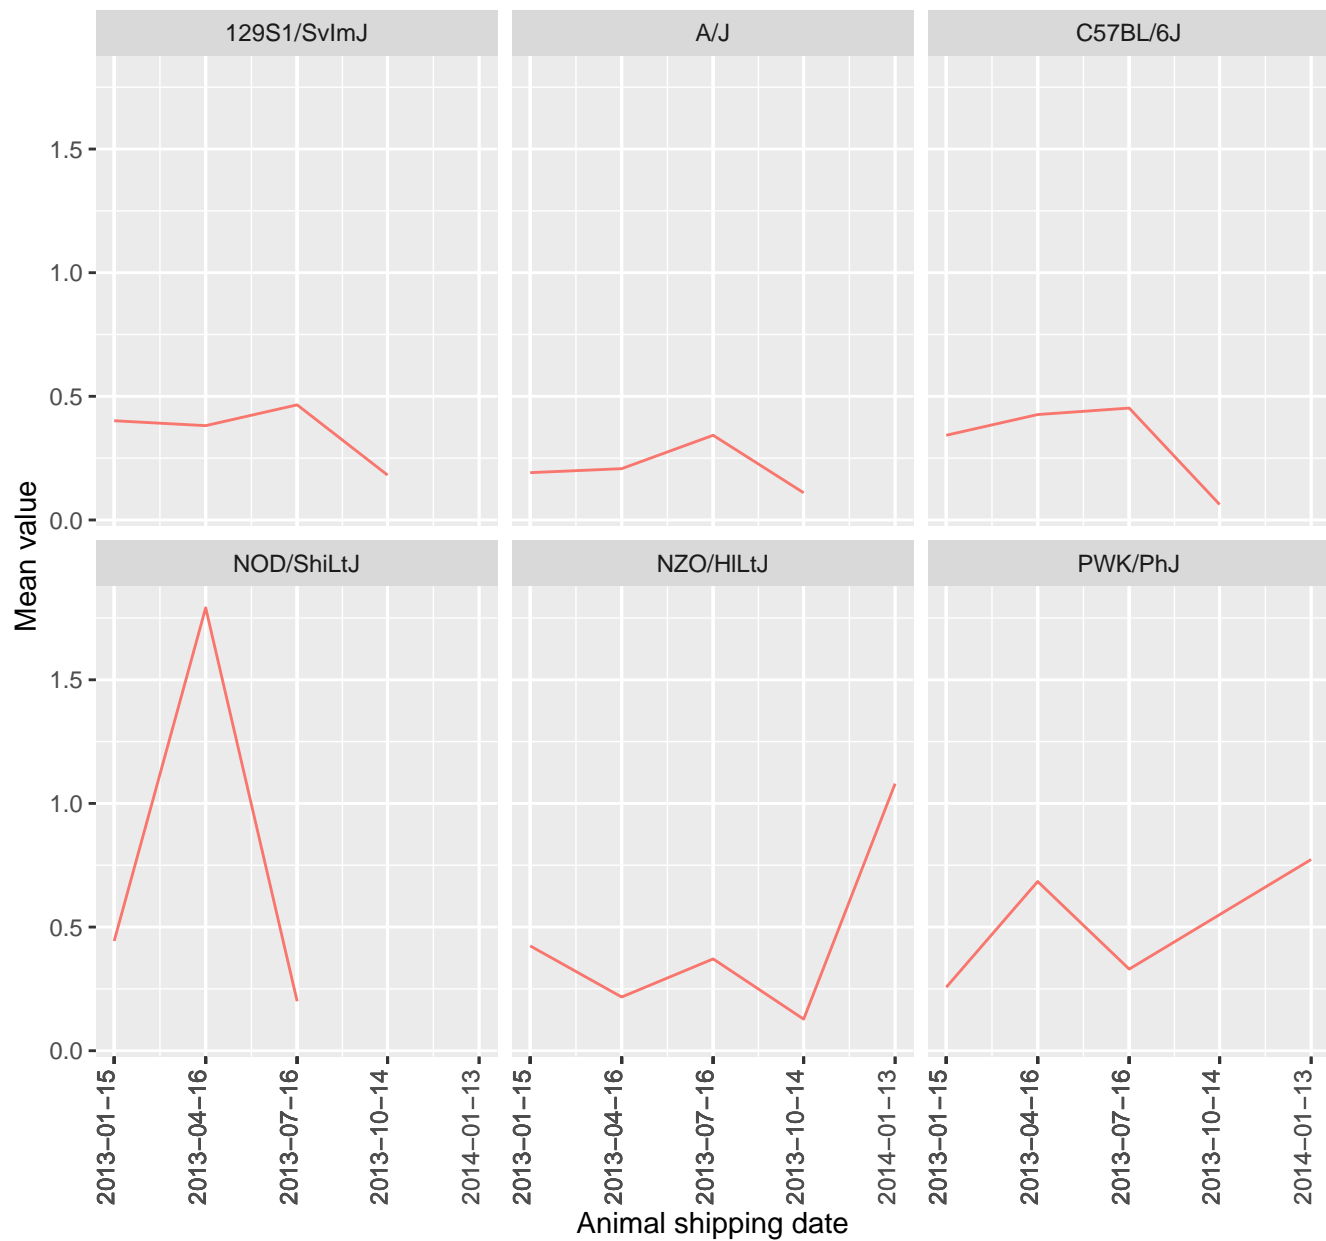



Procedure: GMC13  
Parameter: rMSSD

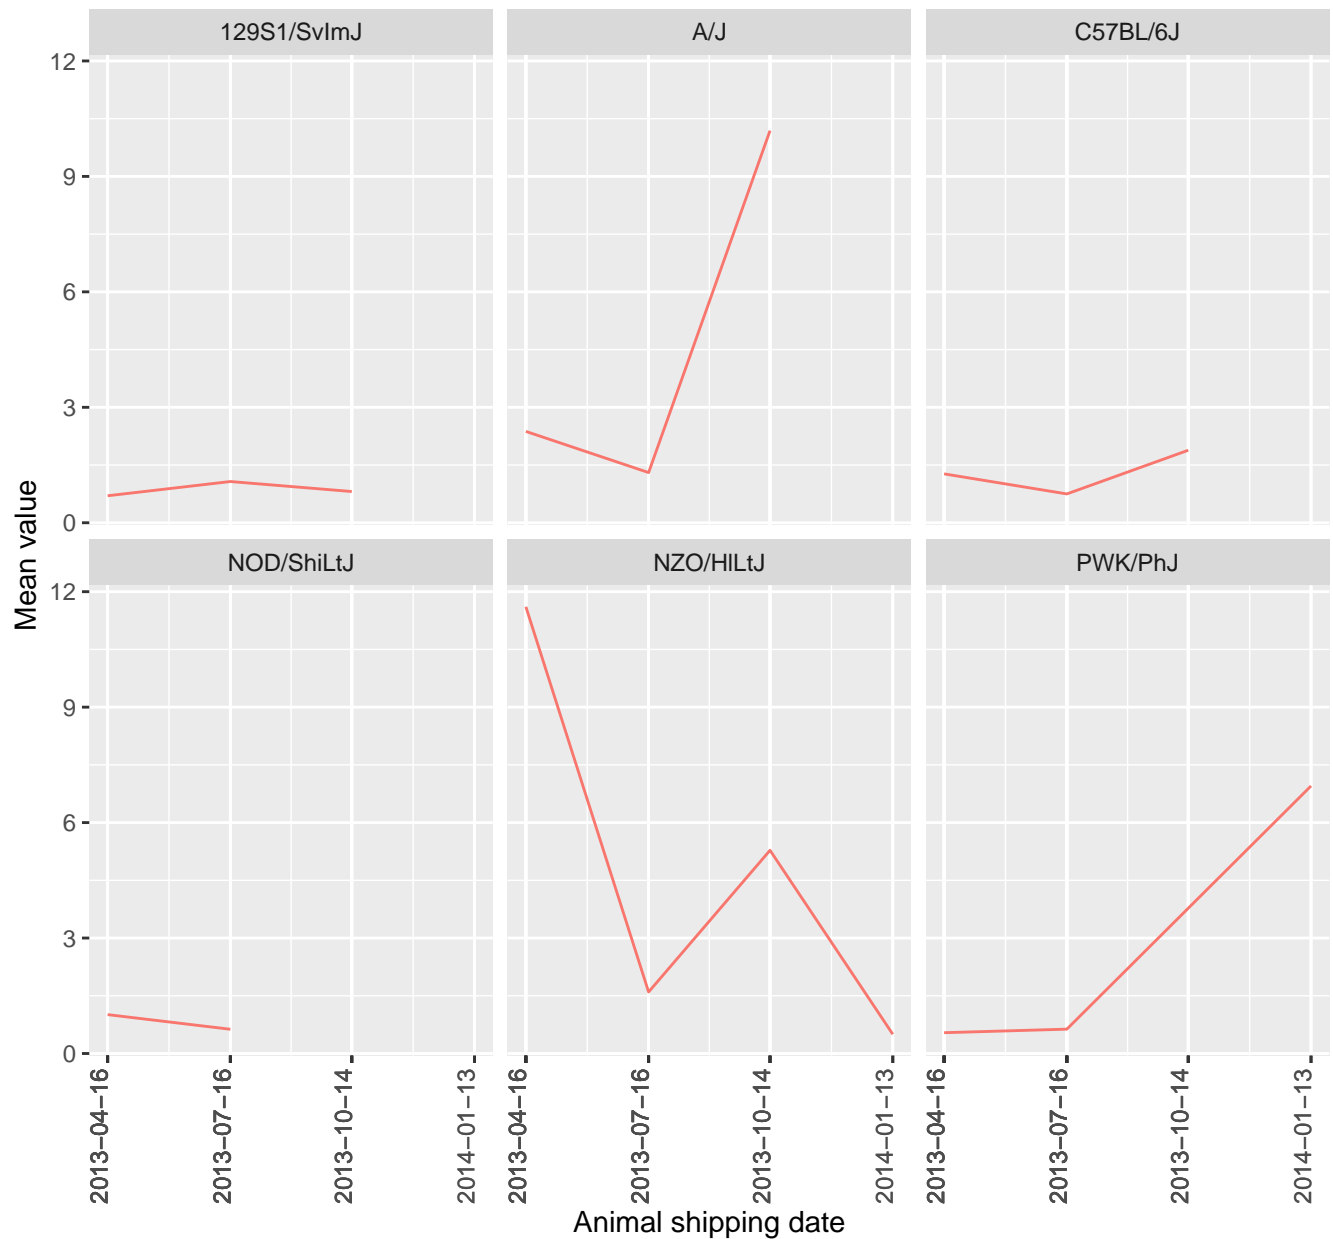

Procedure: GMC13

Parameter: RR

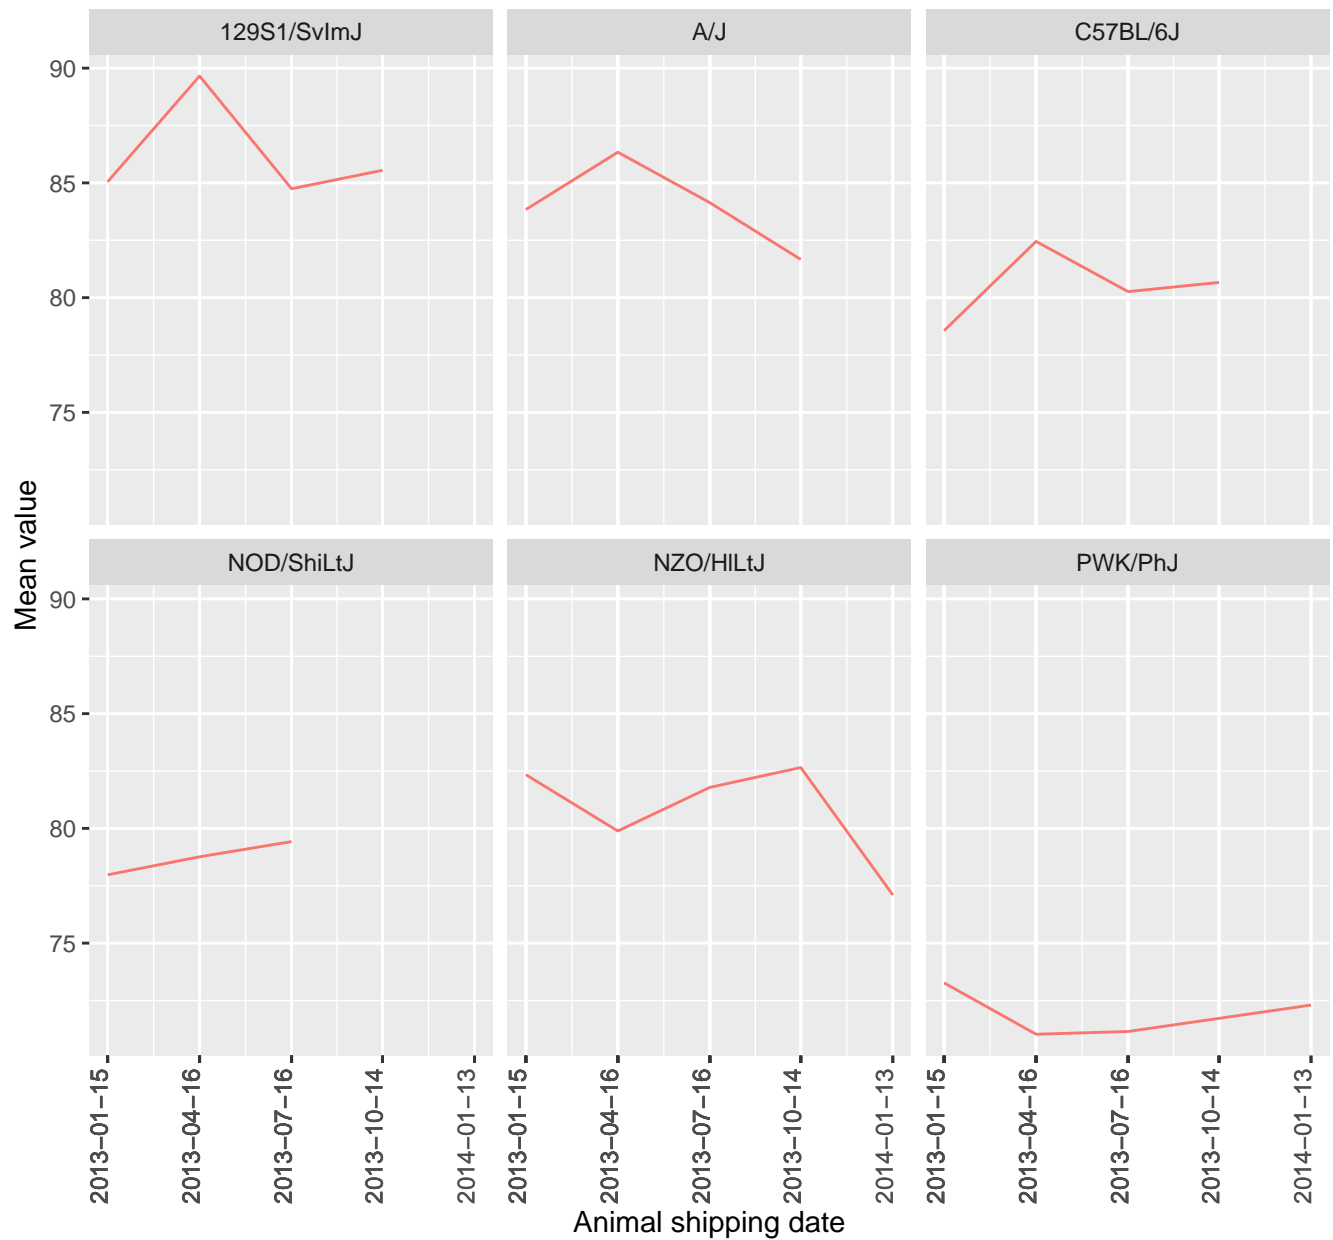

Procedure: GMC13  
Parameter: SR\_amplitude

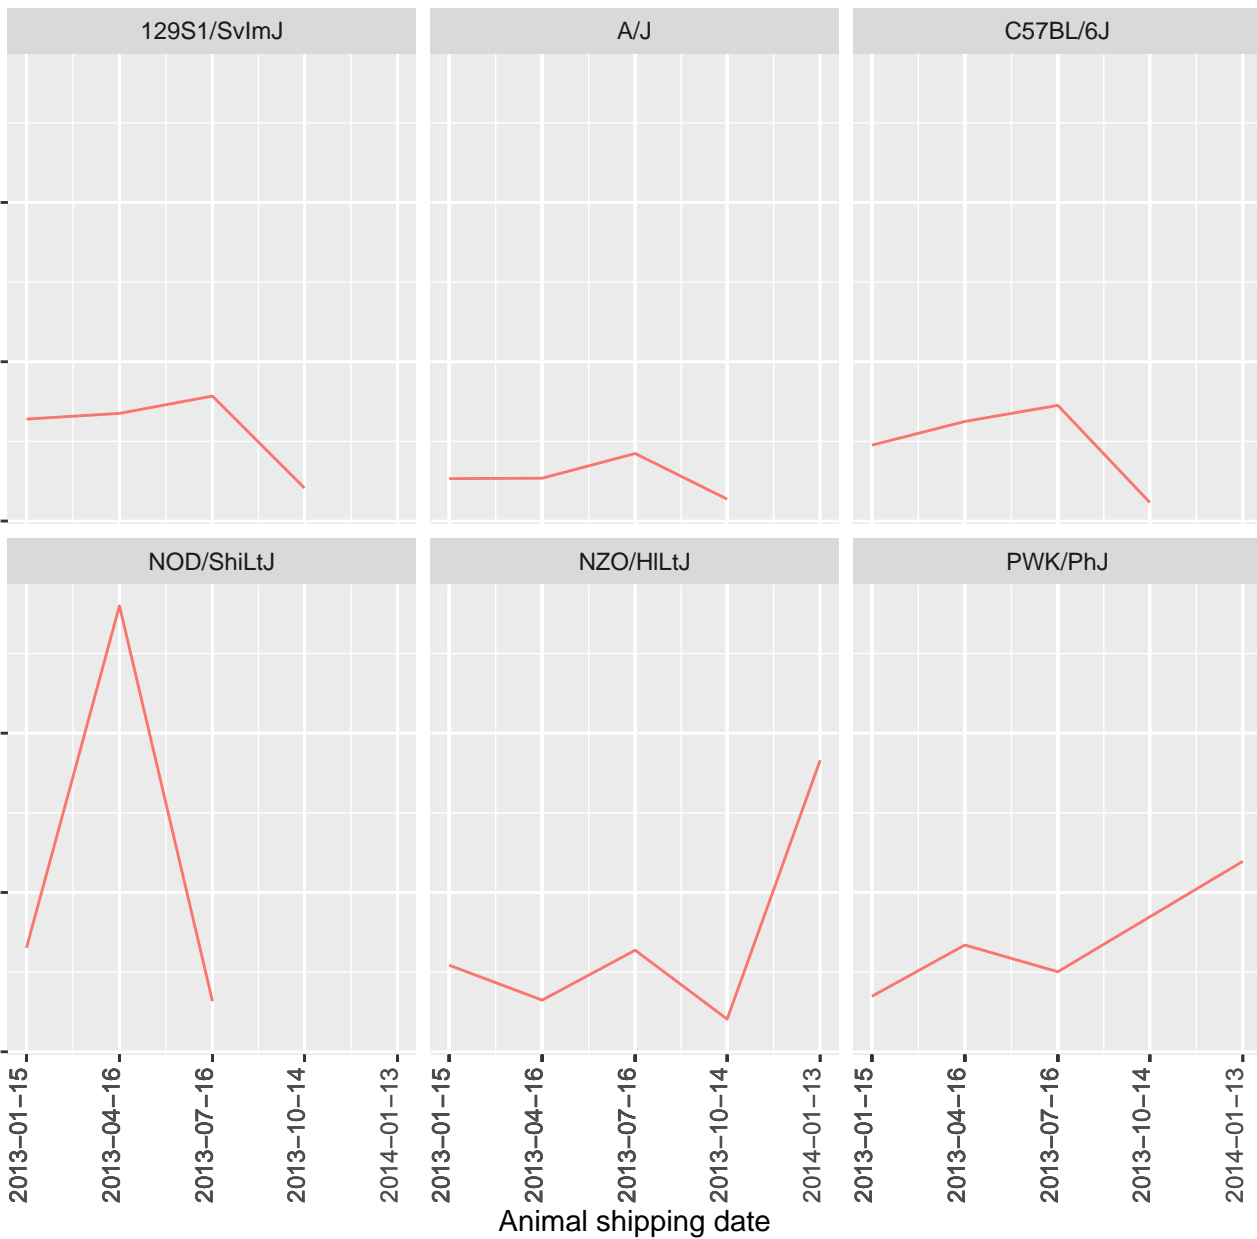

Procedure: GMC13  
Parameter: ST

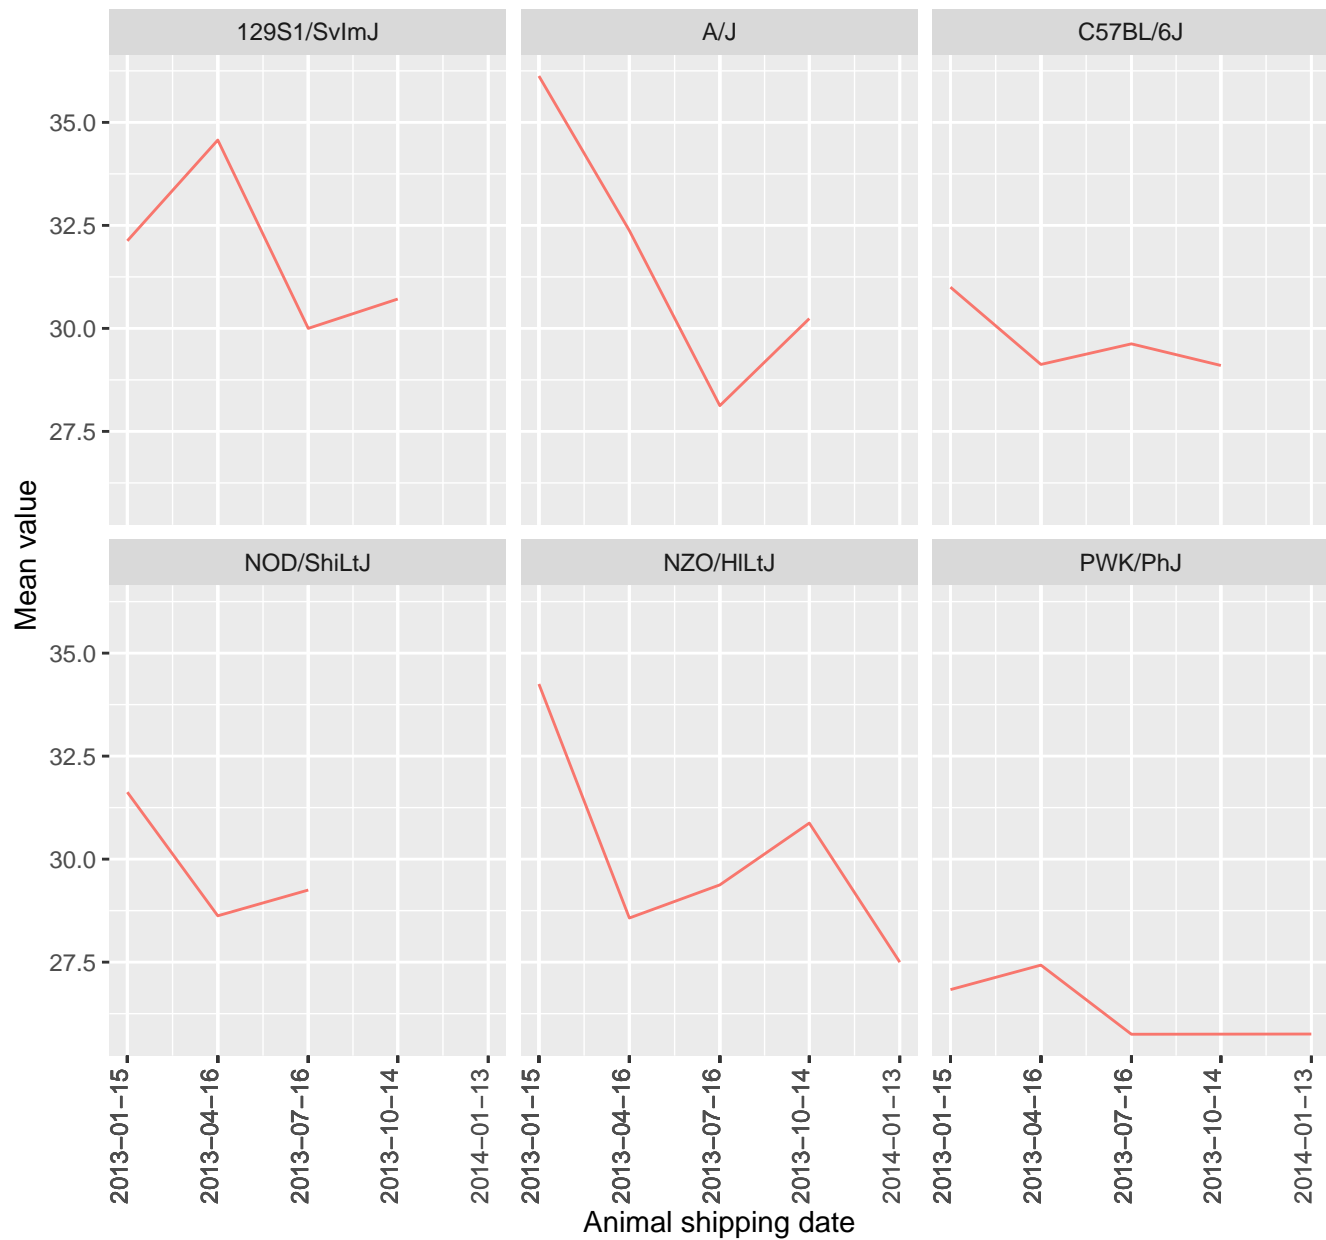

Procedure: GMC14  
Parameter: body\_length

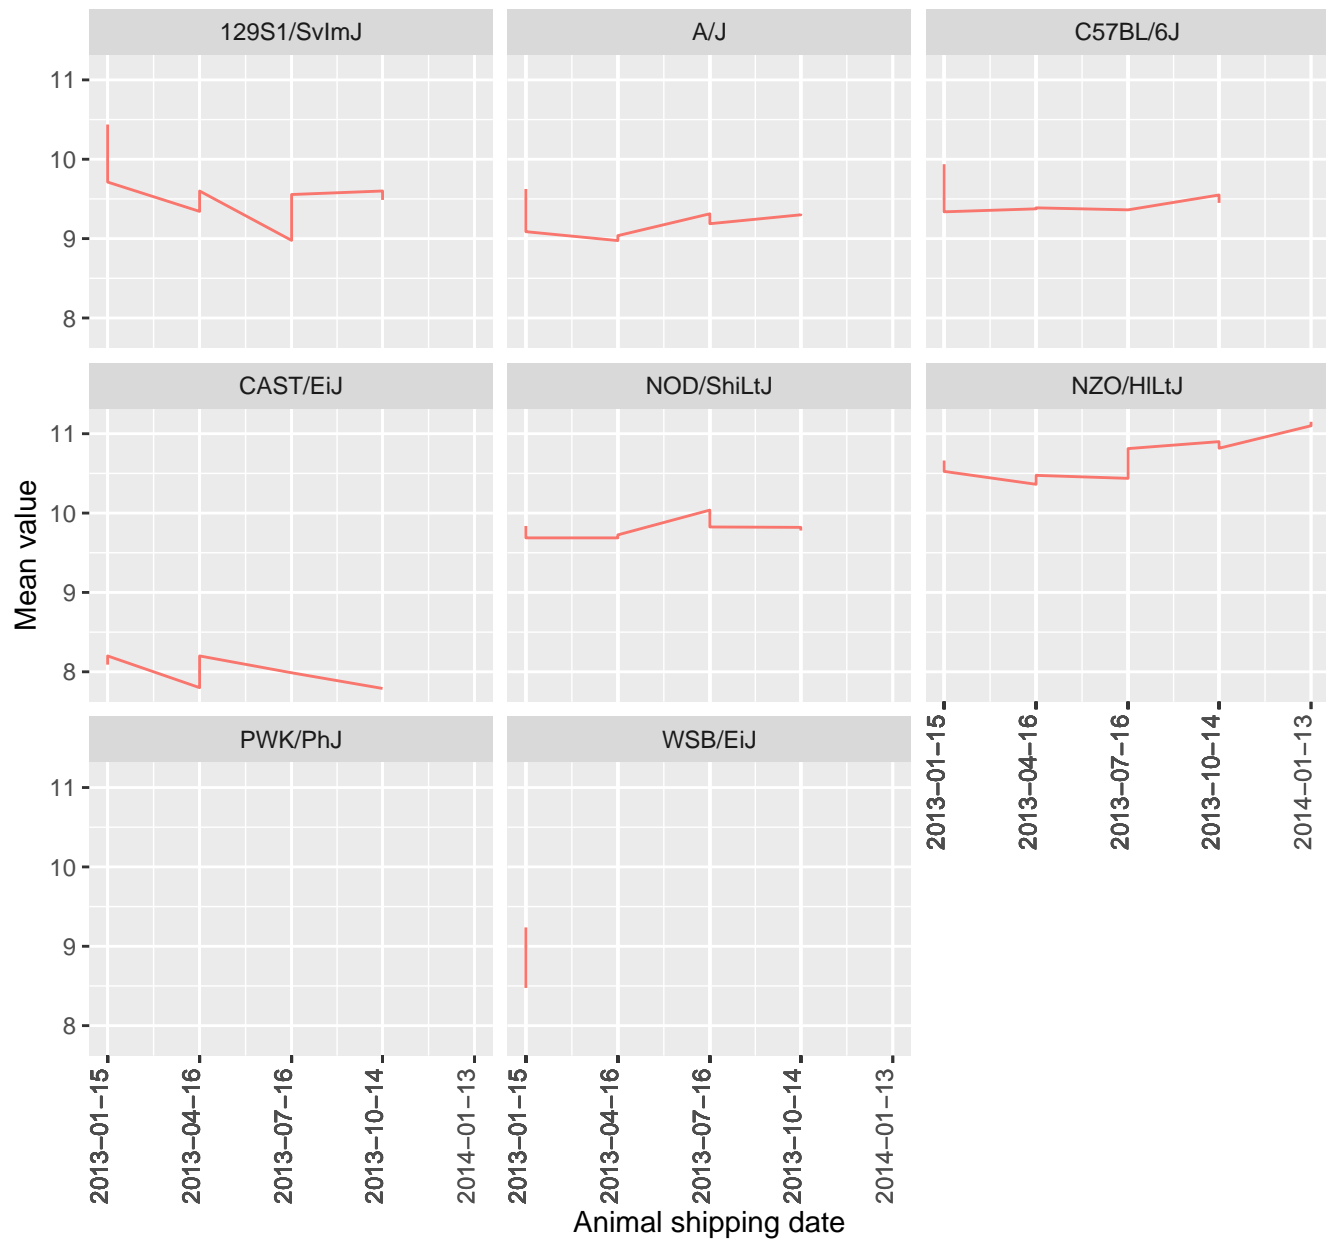

Procedure: GMC14  
Parameter: eye\_length\_L

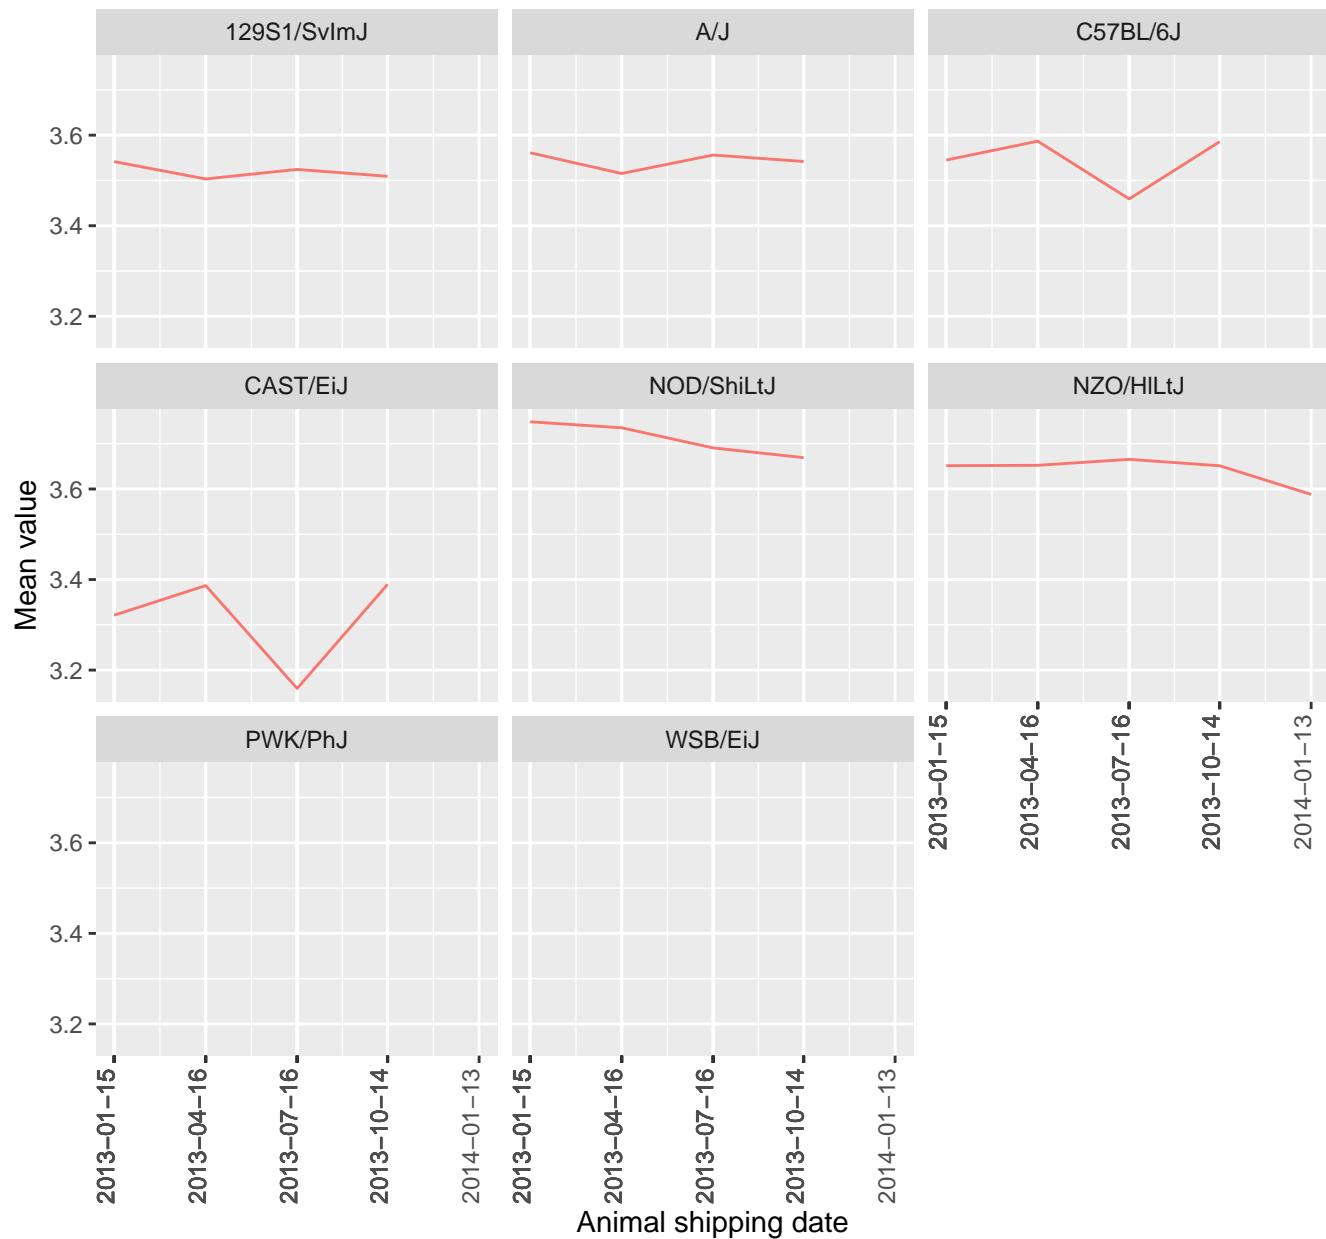

Procedure: GMC14  
Parameter: eye\_length\_R

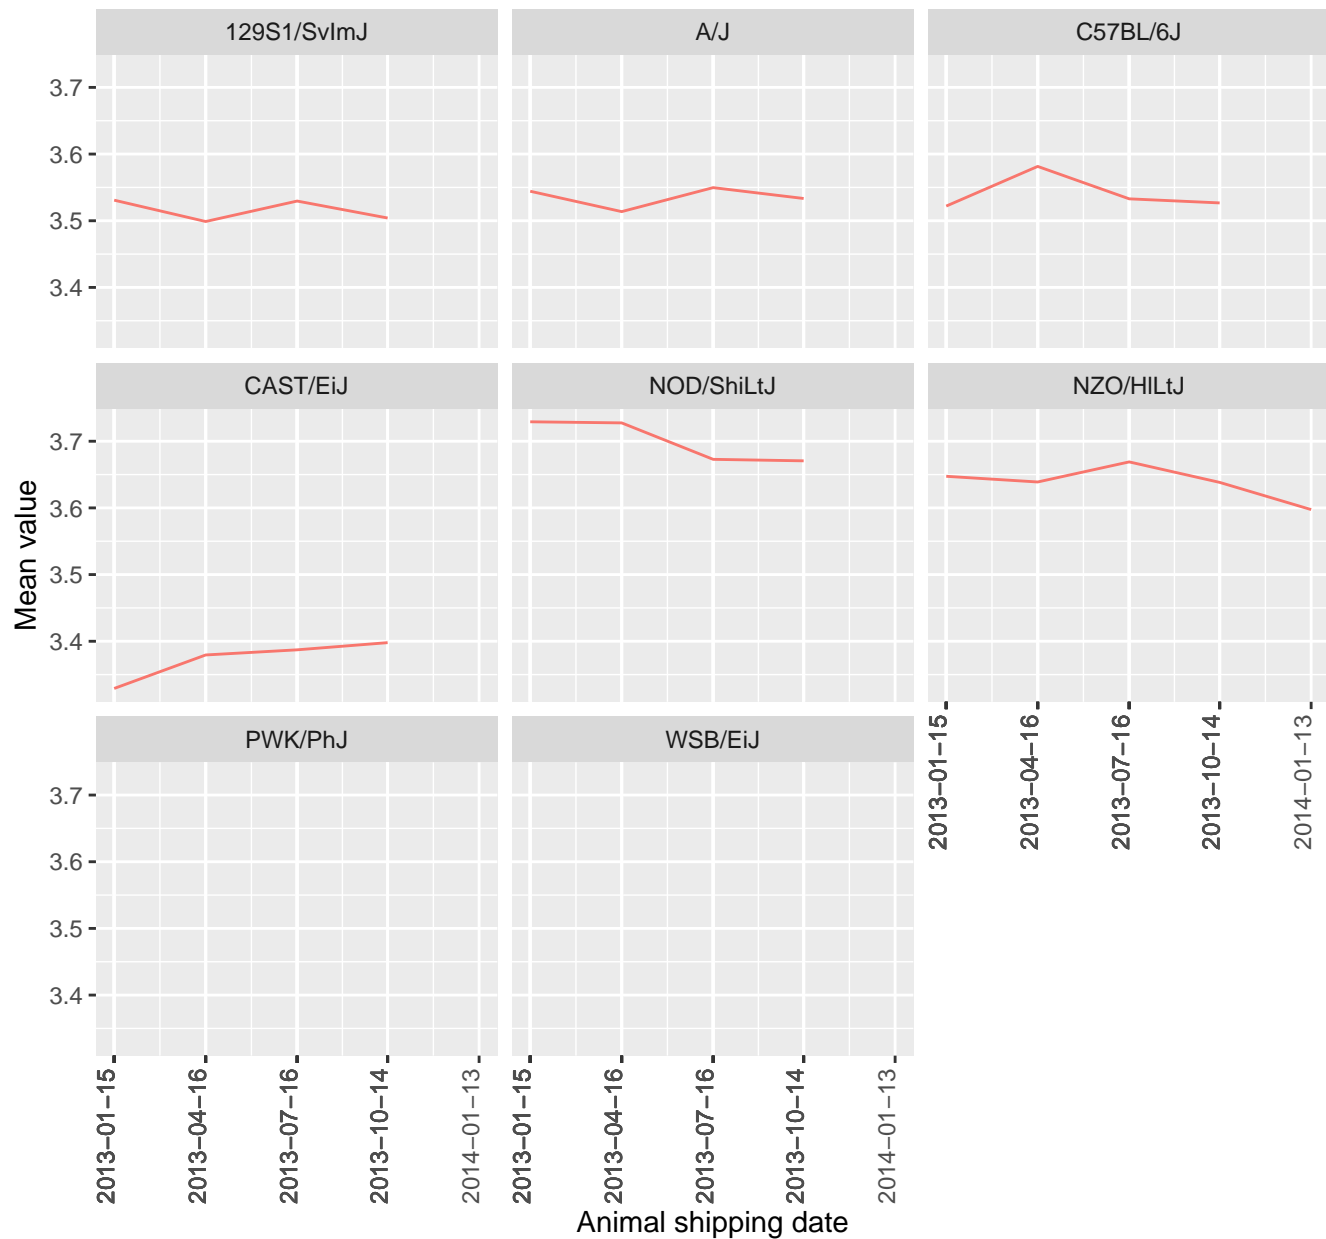

Procedure: GMC14

Parameter: fundus\_vessels\_L

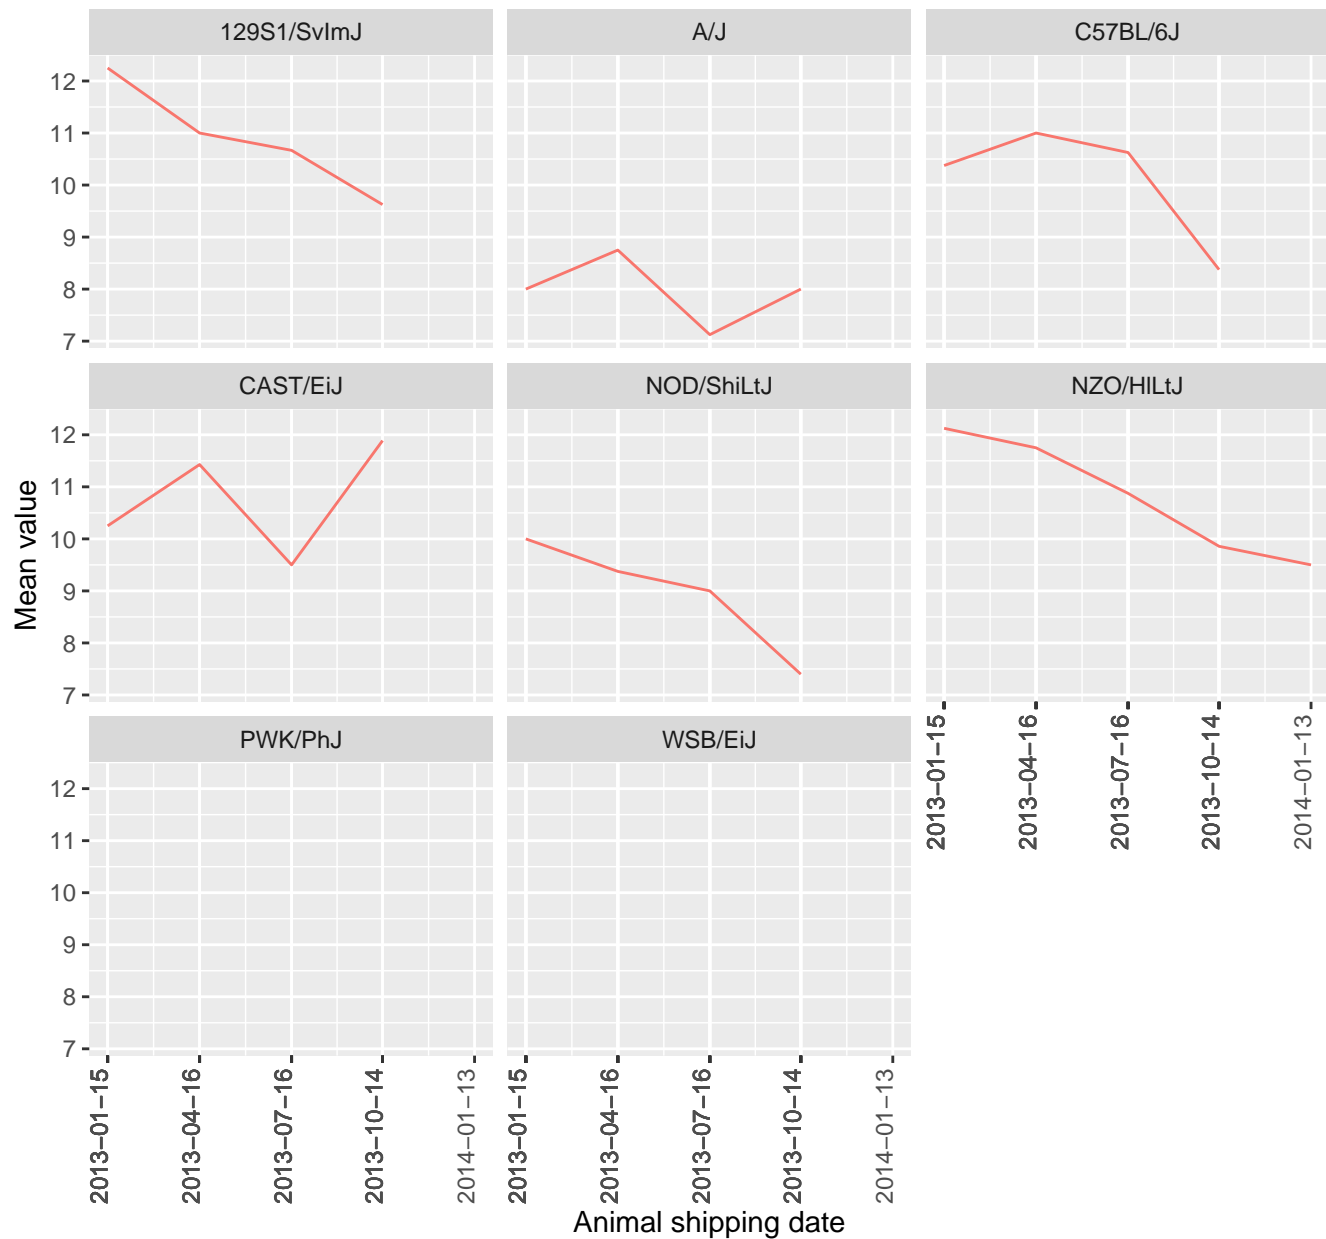



Procedure: GMC14

Parameter: fundus\_vessels\_R

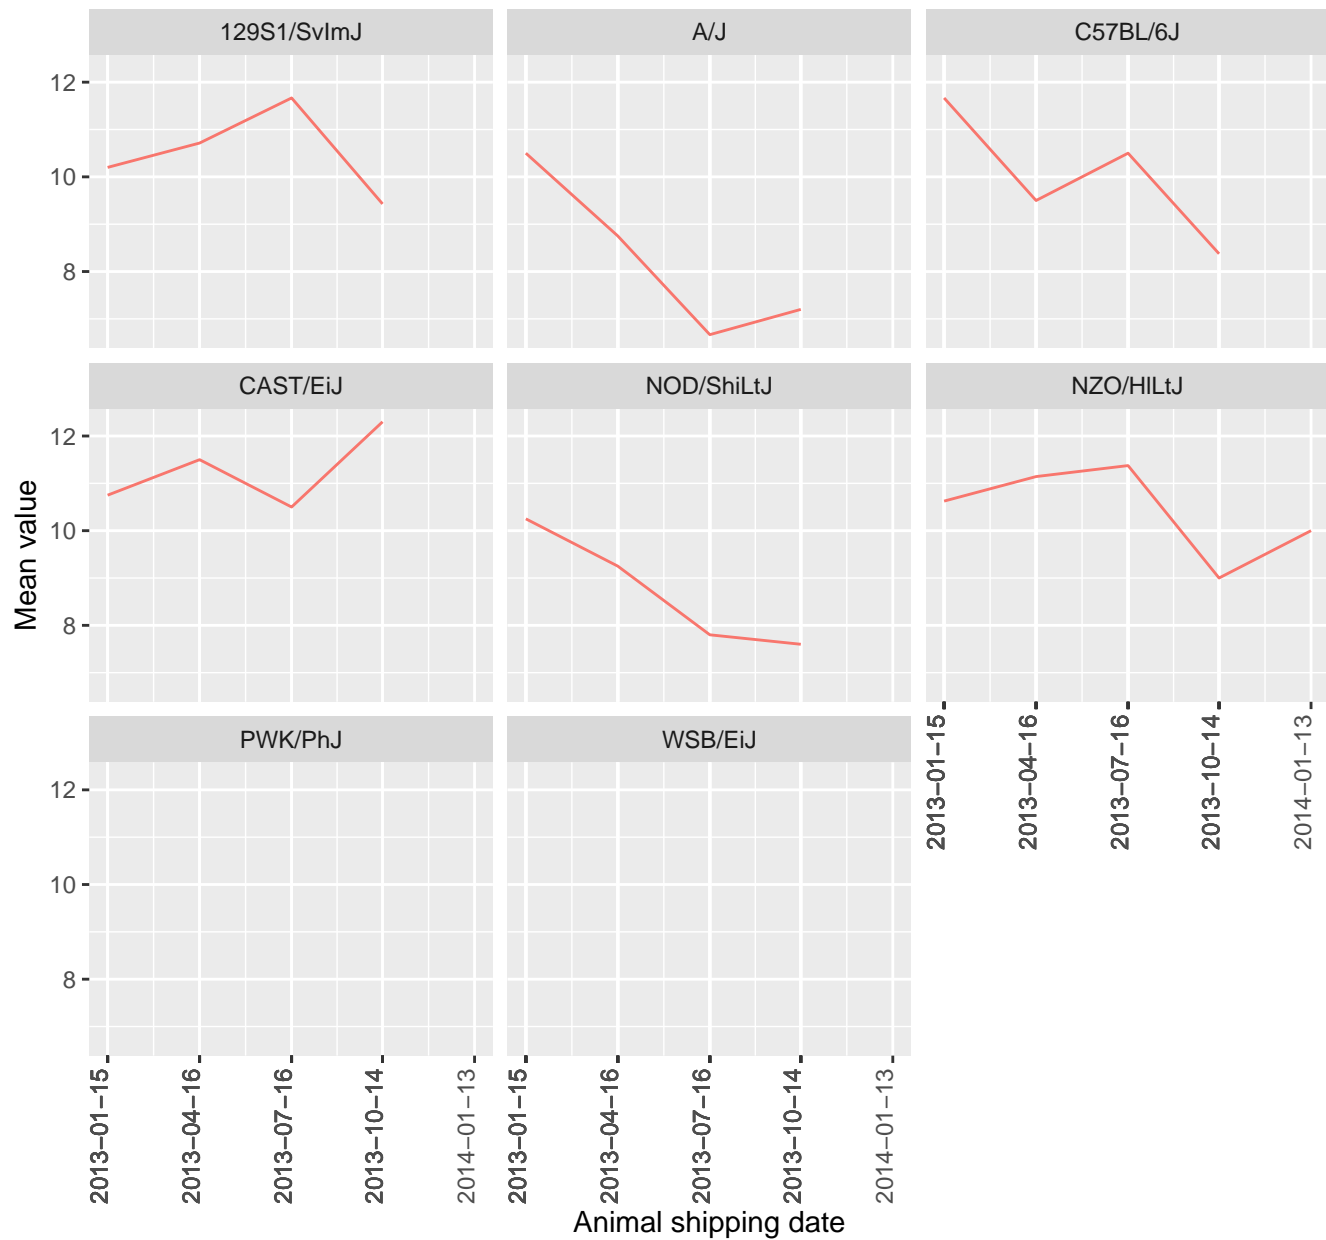

Procedure: GMC14

Parameter: lens\_max\_density\_L

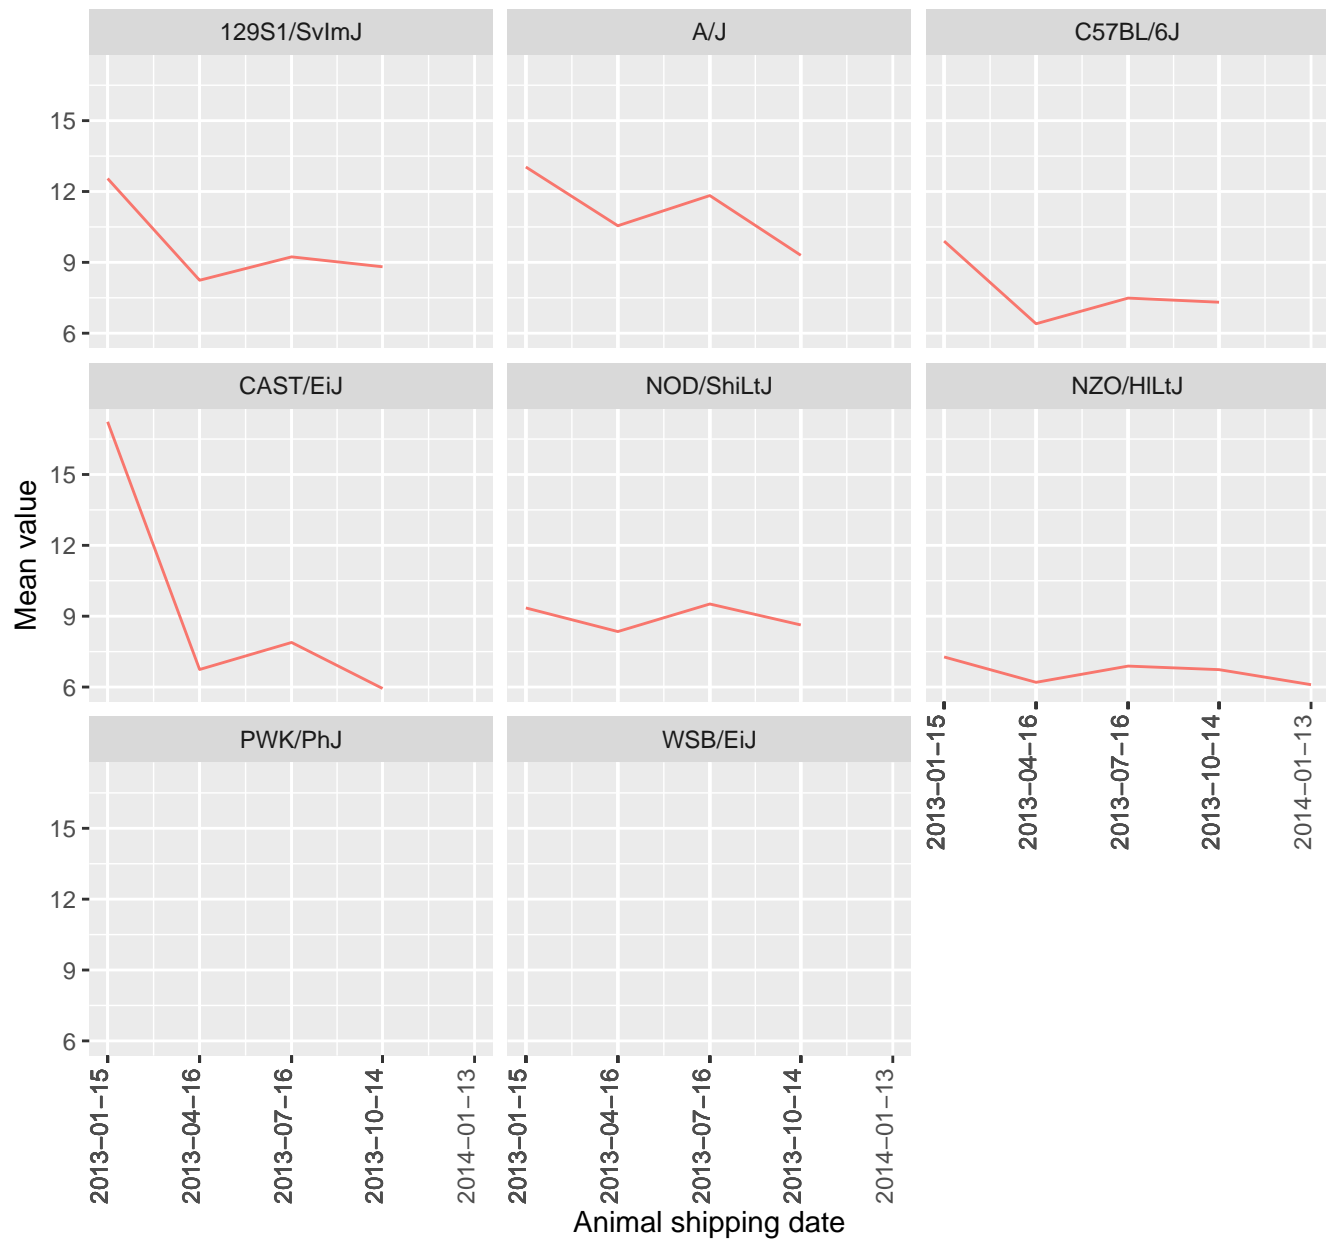

Procedure: GMC14

Parameter: lens\_max\_density\_R

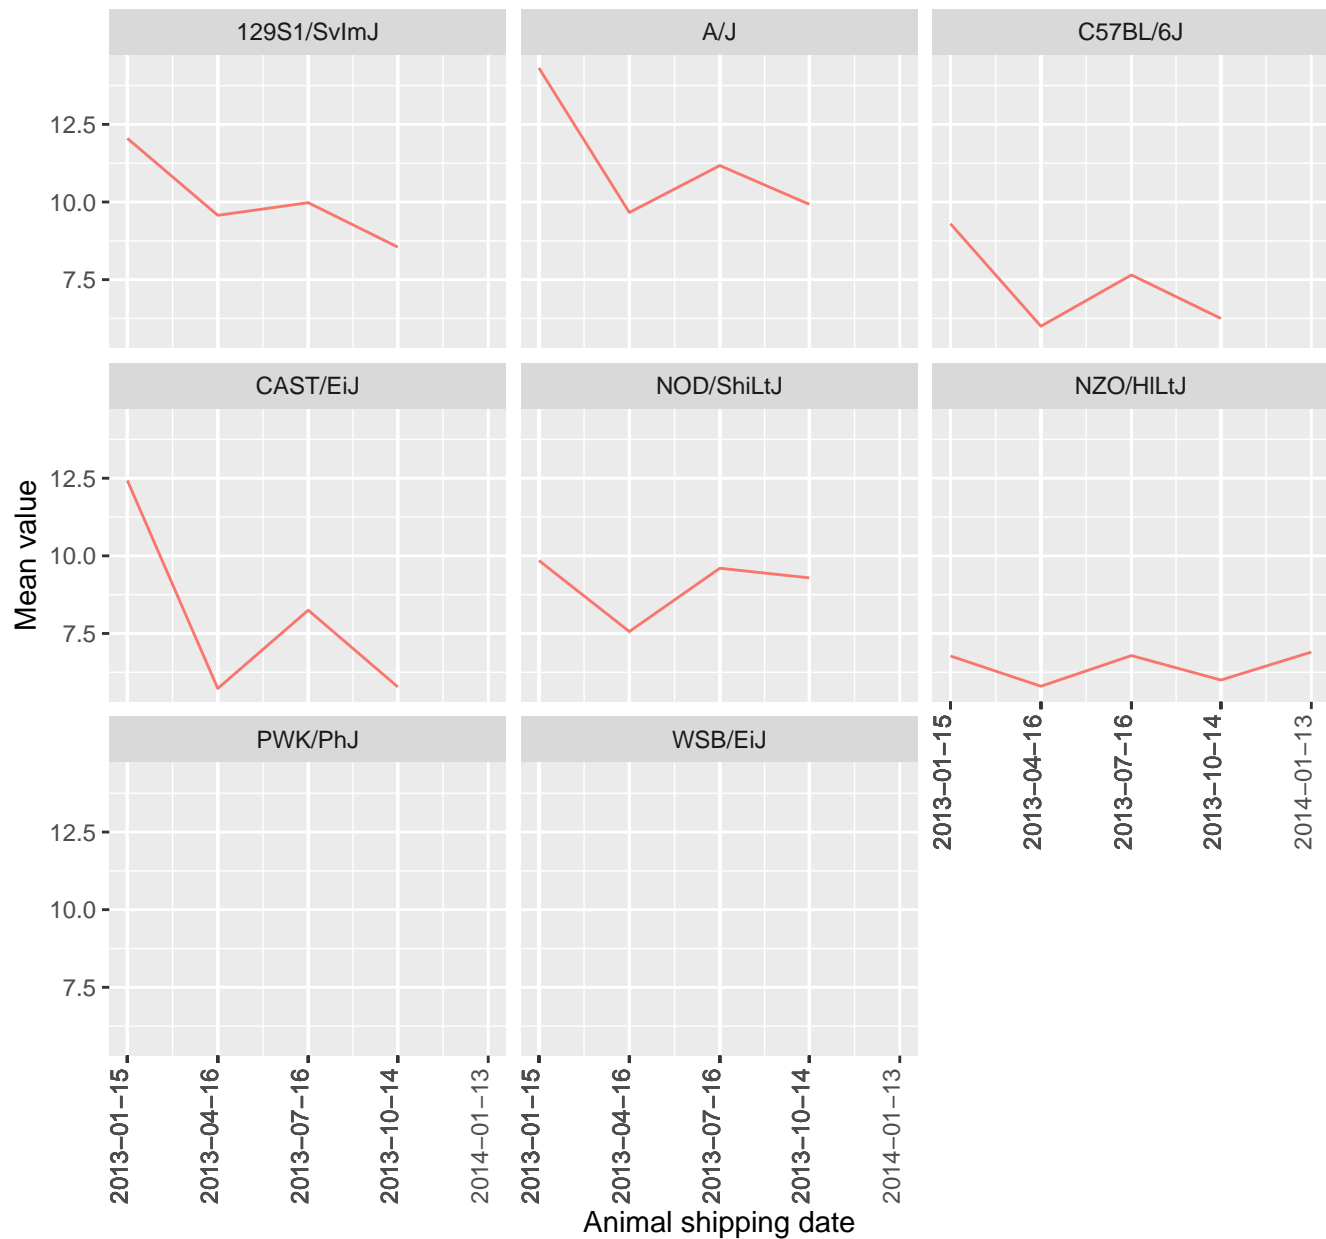

Procedure: GMC14

Parameter: lens\_mean\_density\_L

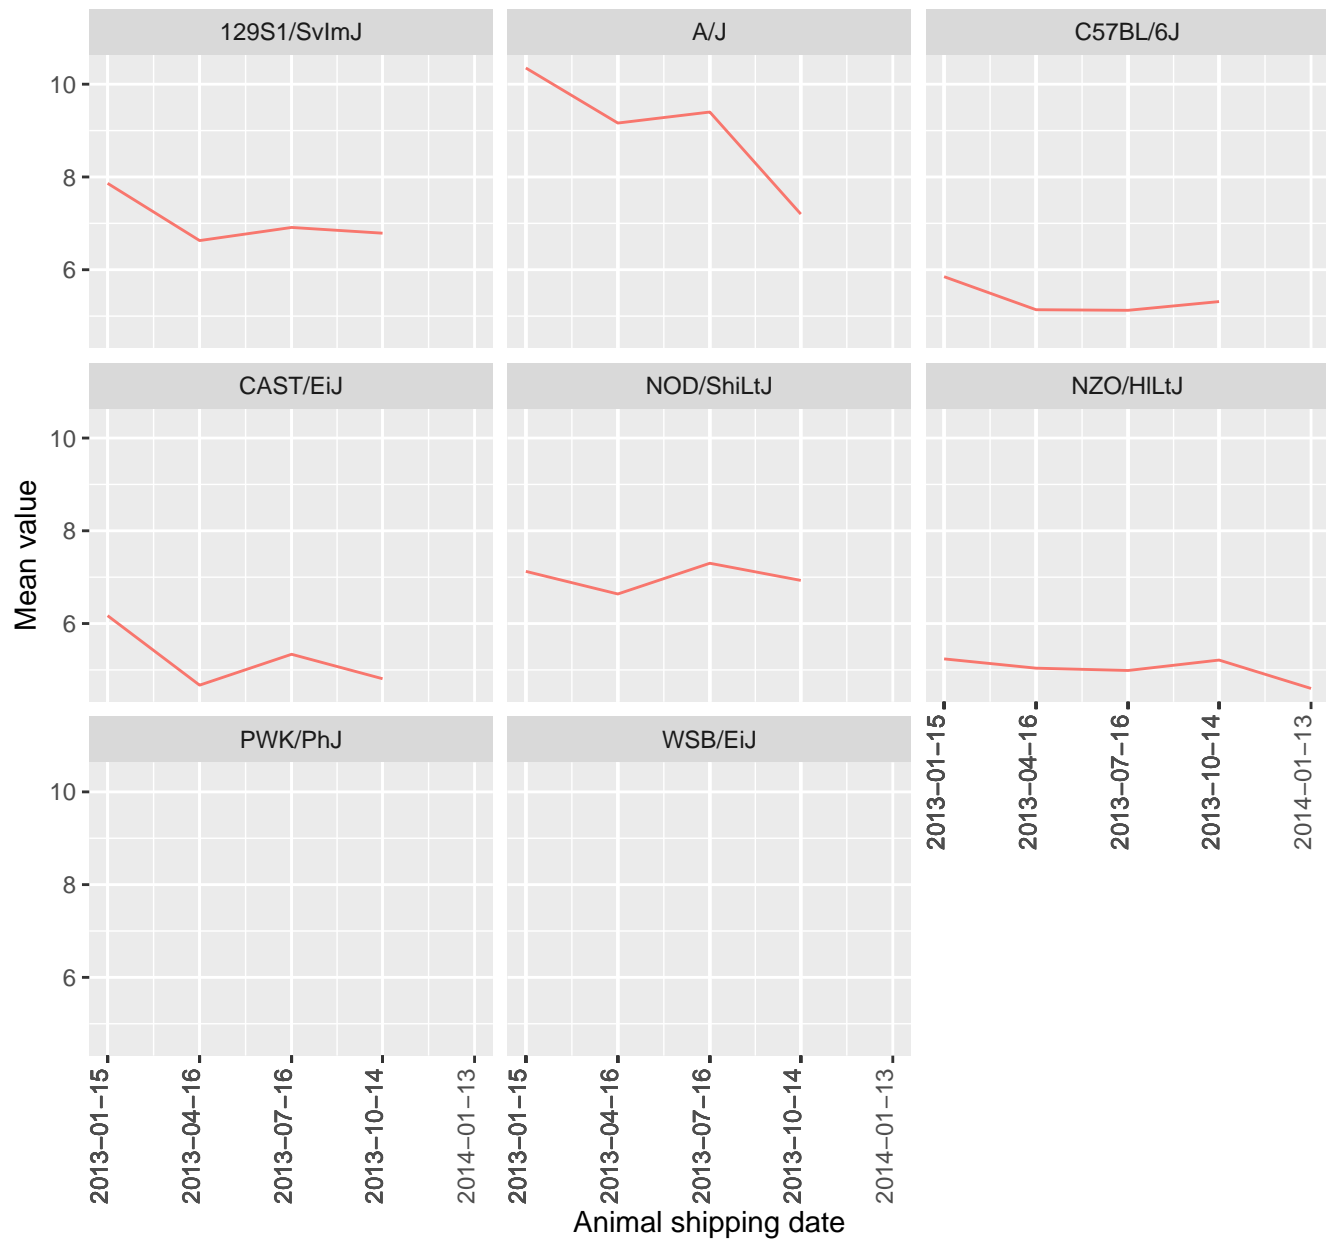

Procedure: GMC14

Parameter: lens\_mean\_density\_R

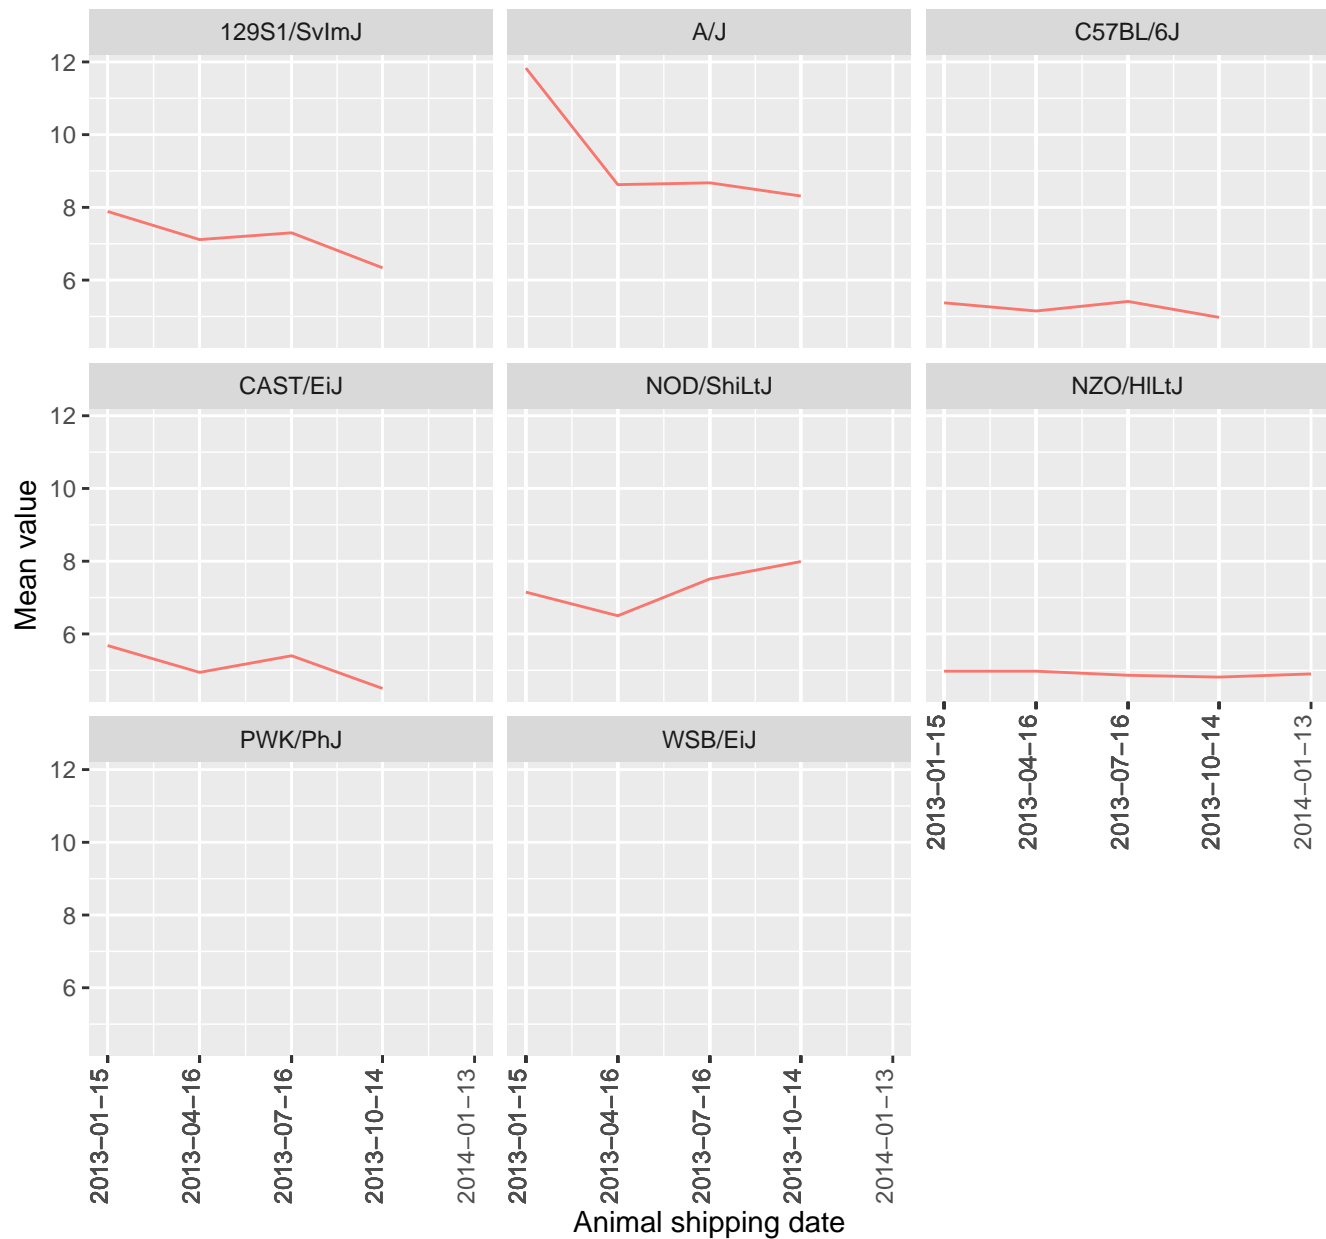

Procedure: GMC14

Parameter: lens\_min\_density\_L

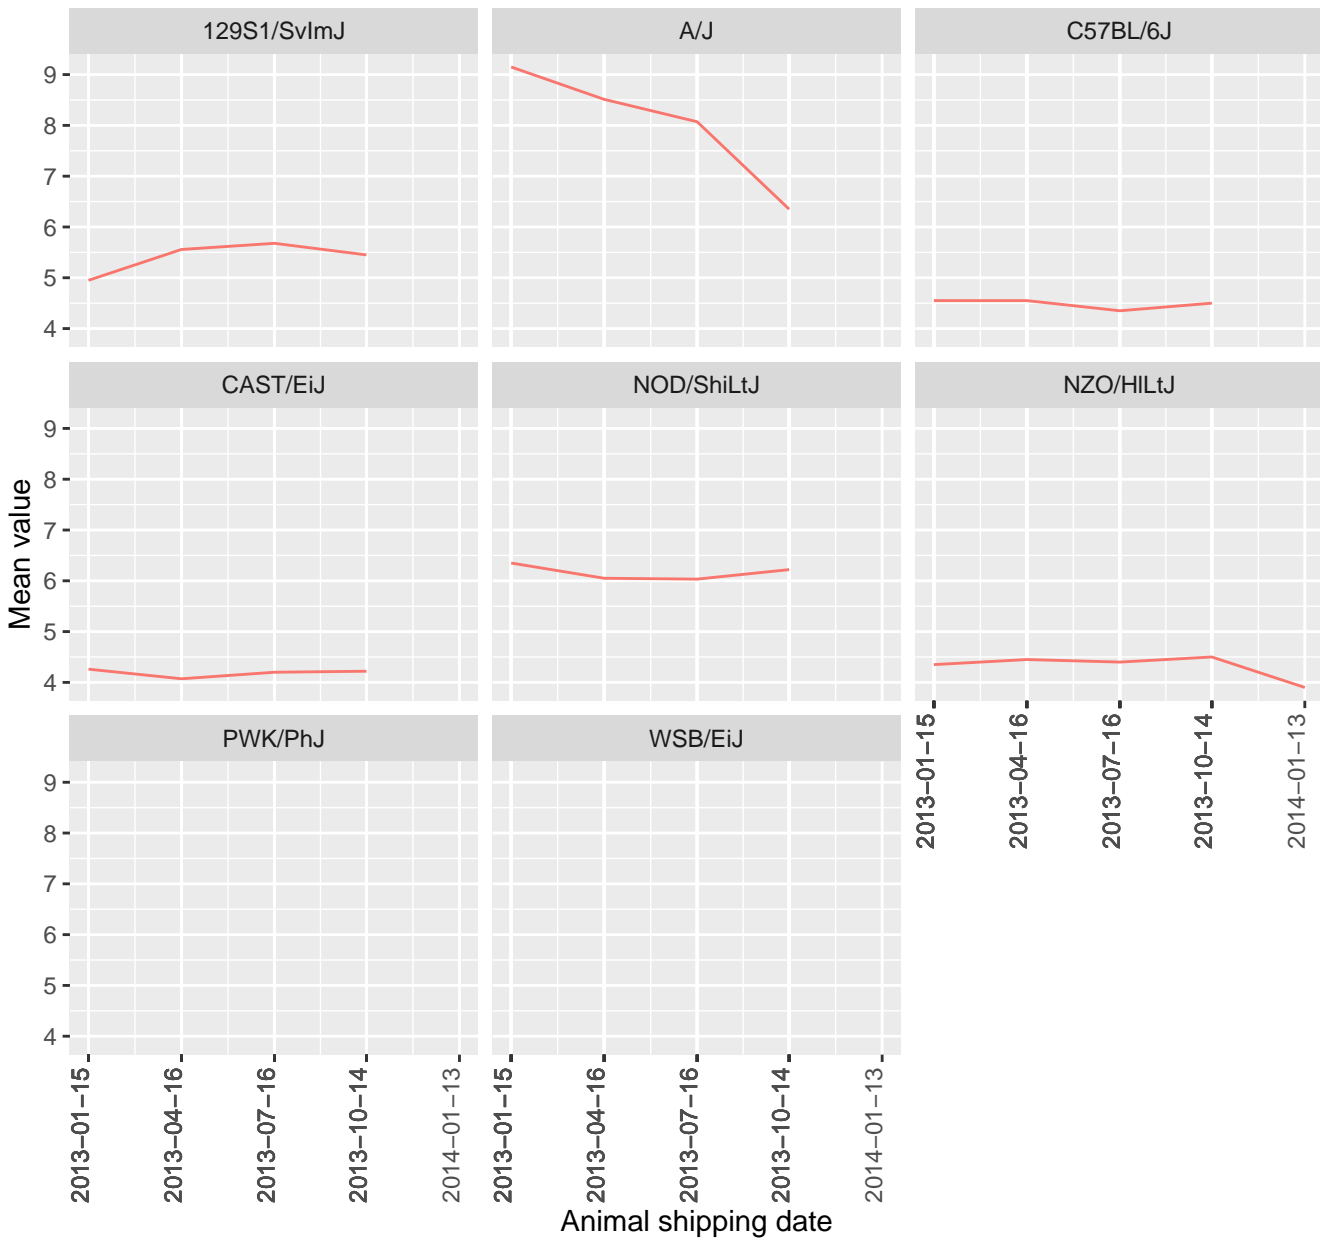

Procedure: GMC14

Parameter: lens\_min\_density\_R

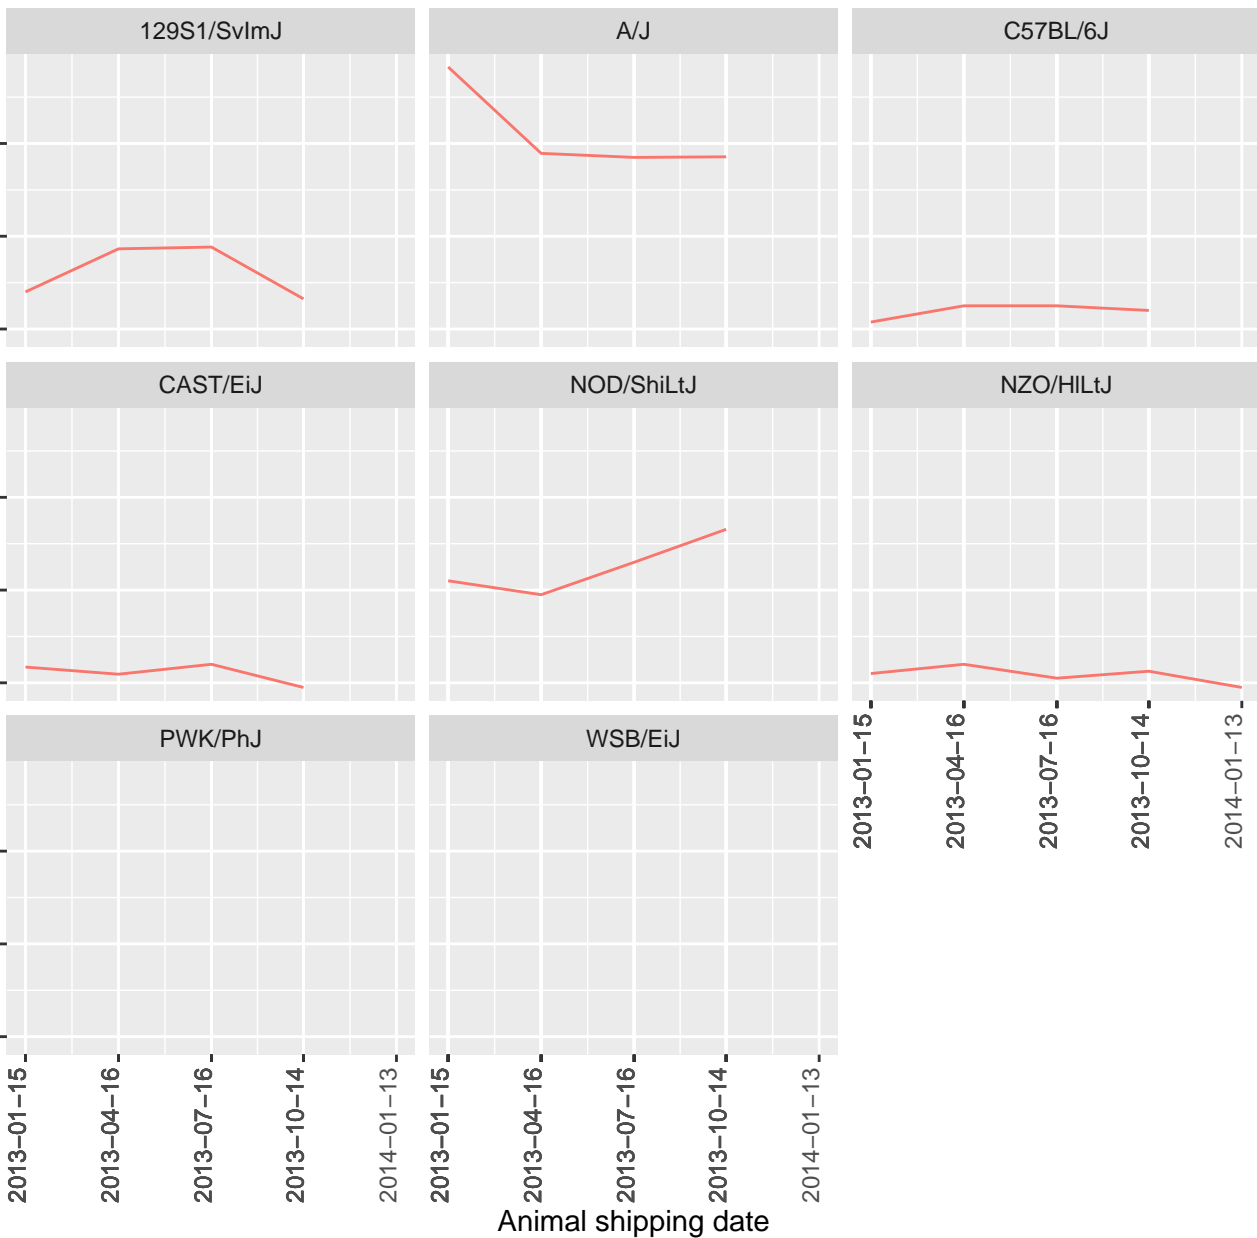

Procedure: GMC14

Parameter: retinal\_thickness\_L

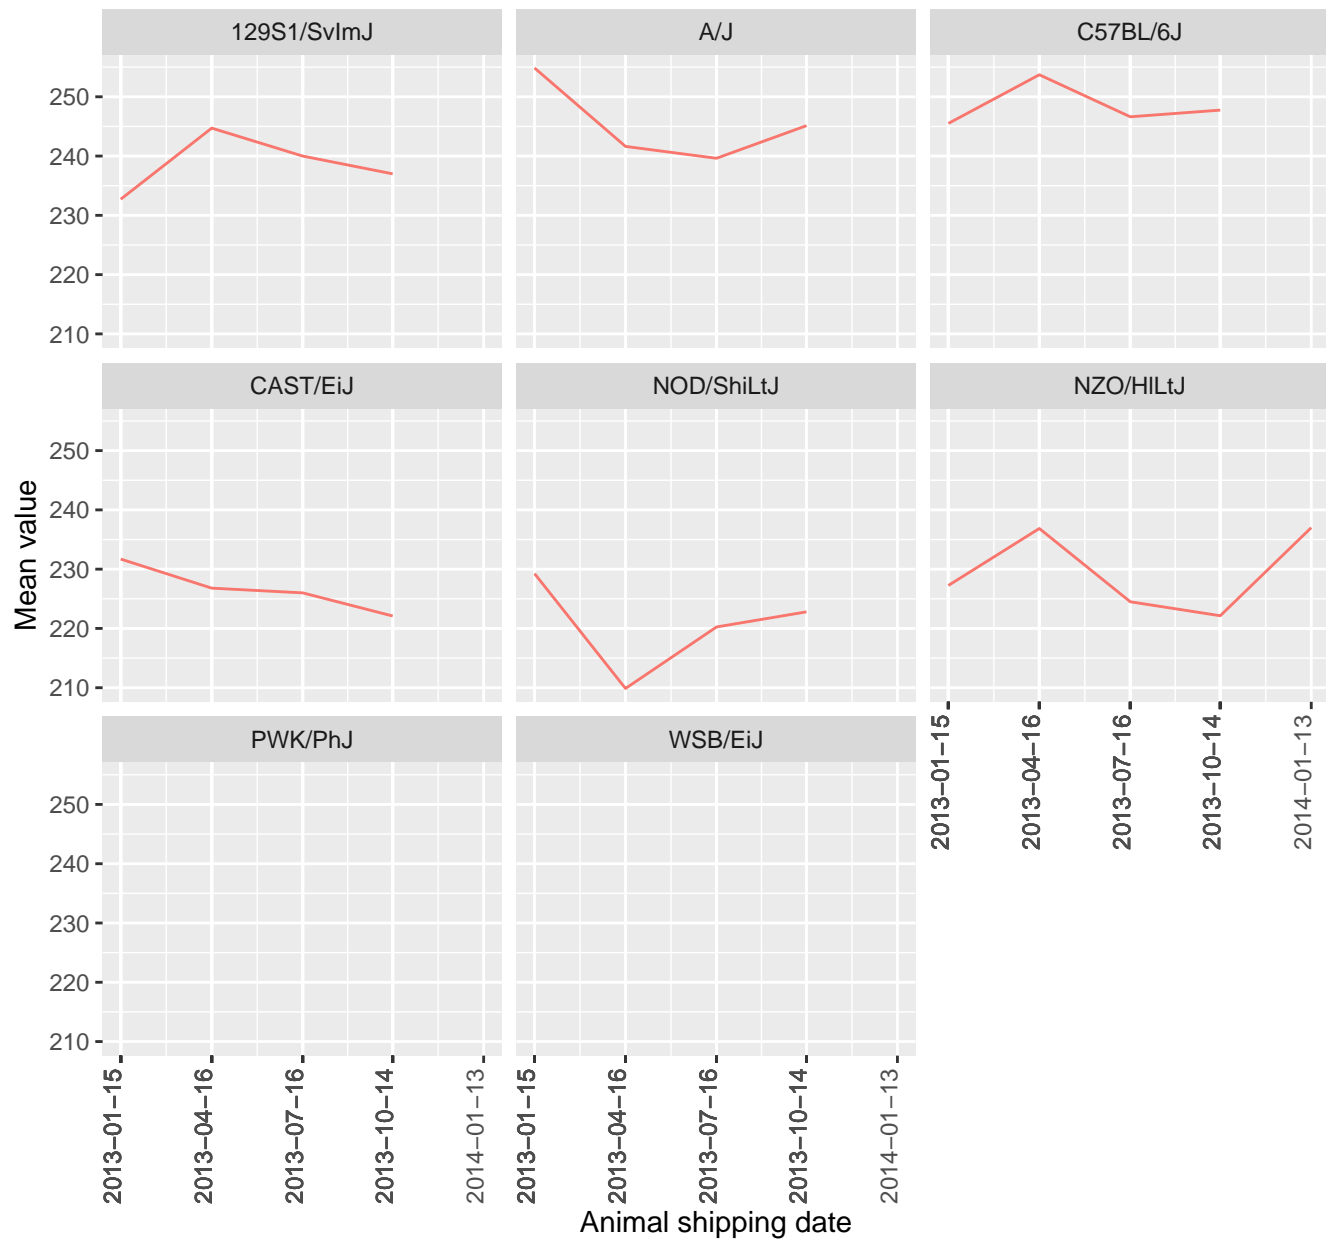



Procedure: GMC14

Parameter: retinal\_thickness\_R

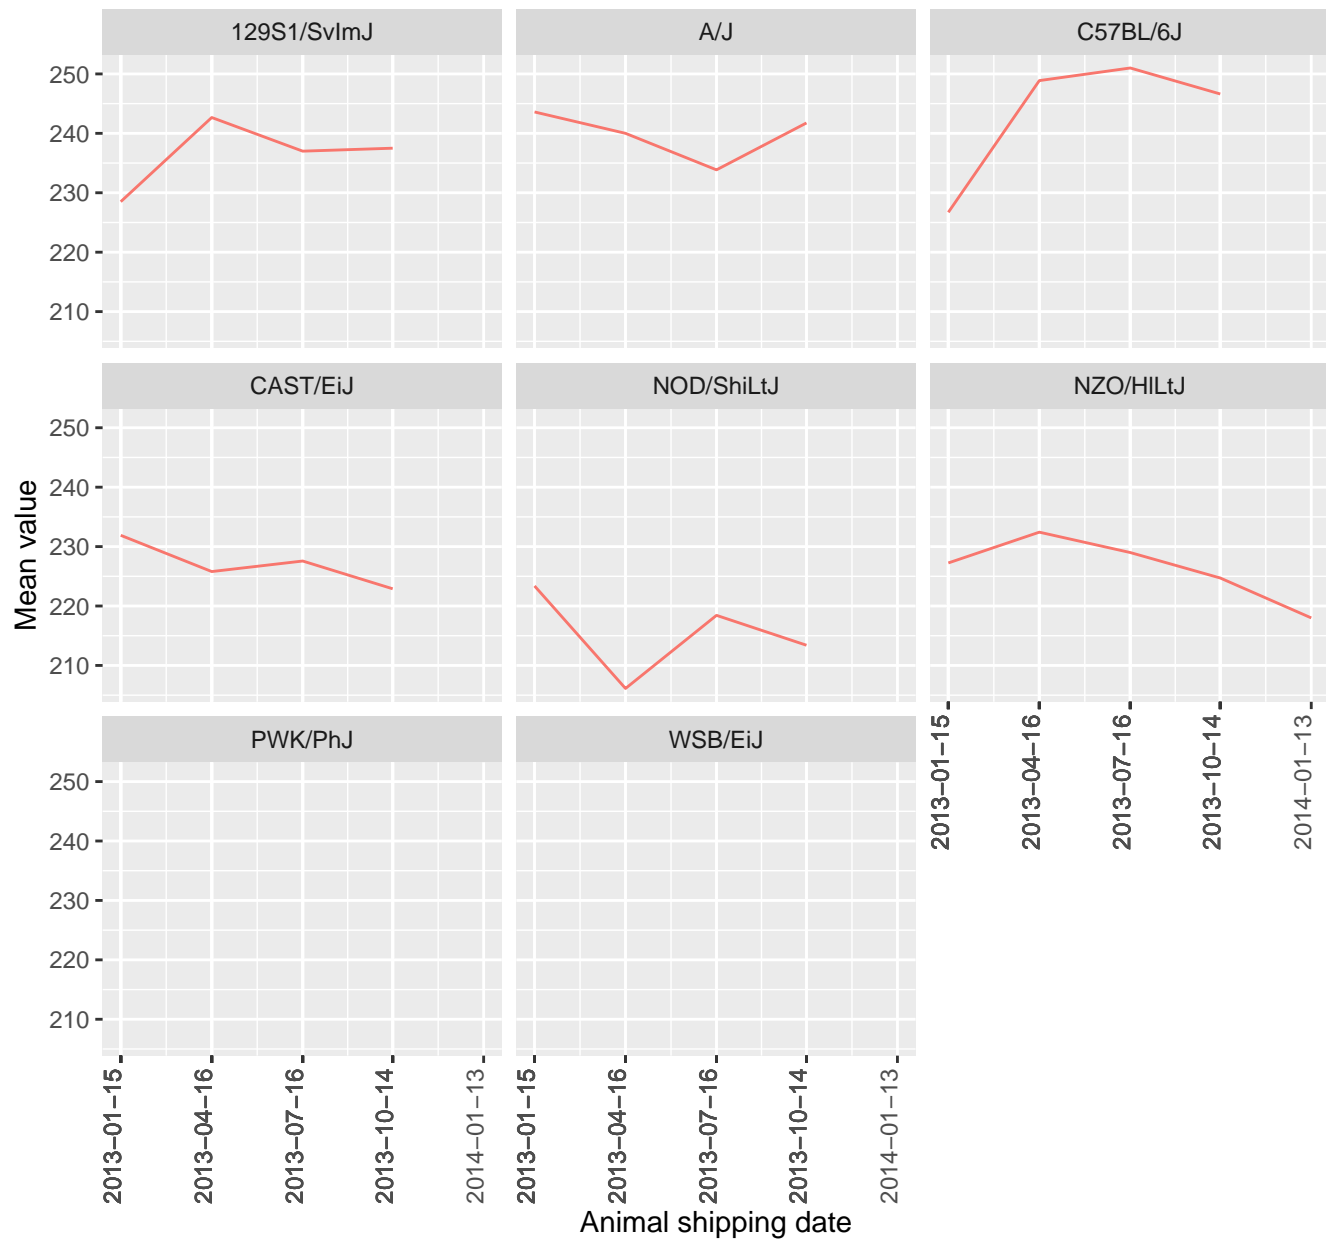

Procedure: GMC14  
Parameter: spatial\_freq

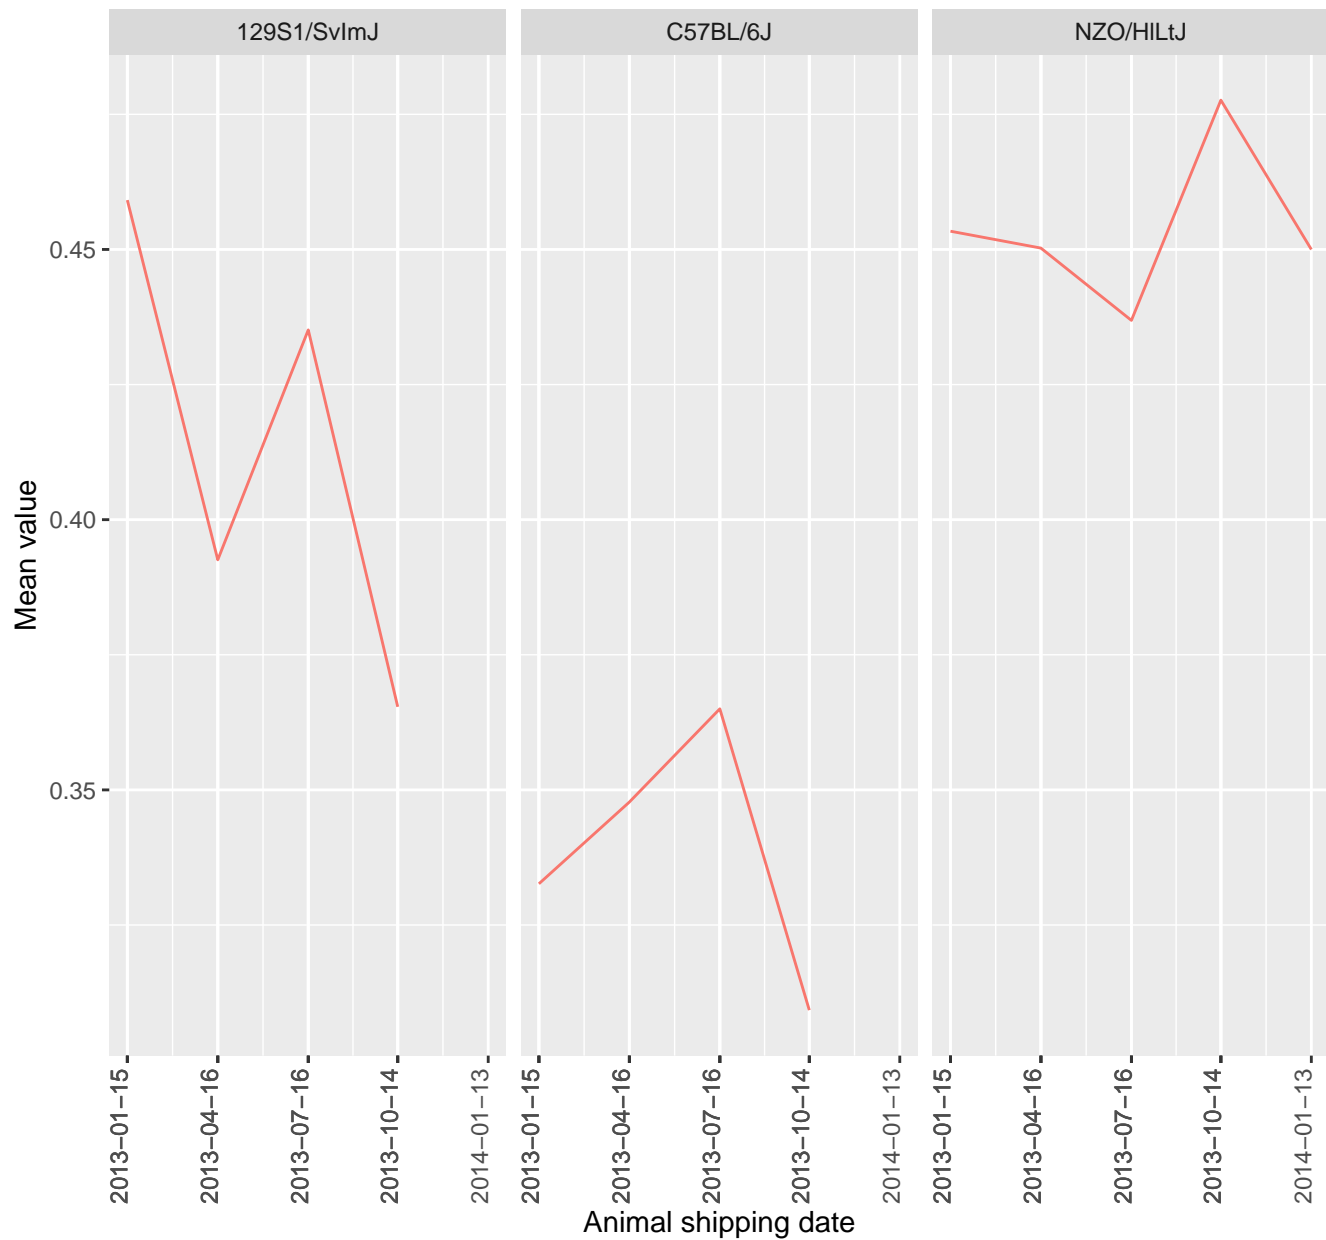

Procedure: GMC15  
Parameter: HCT

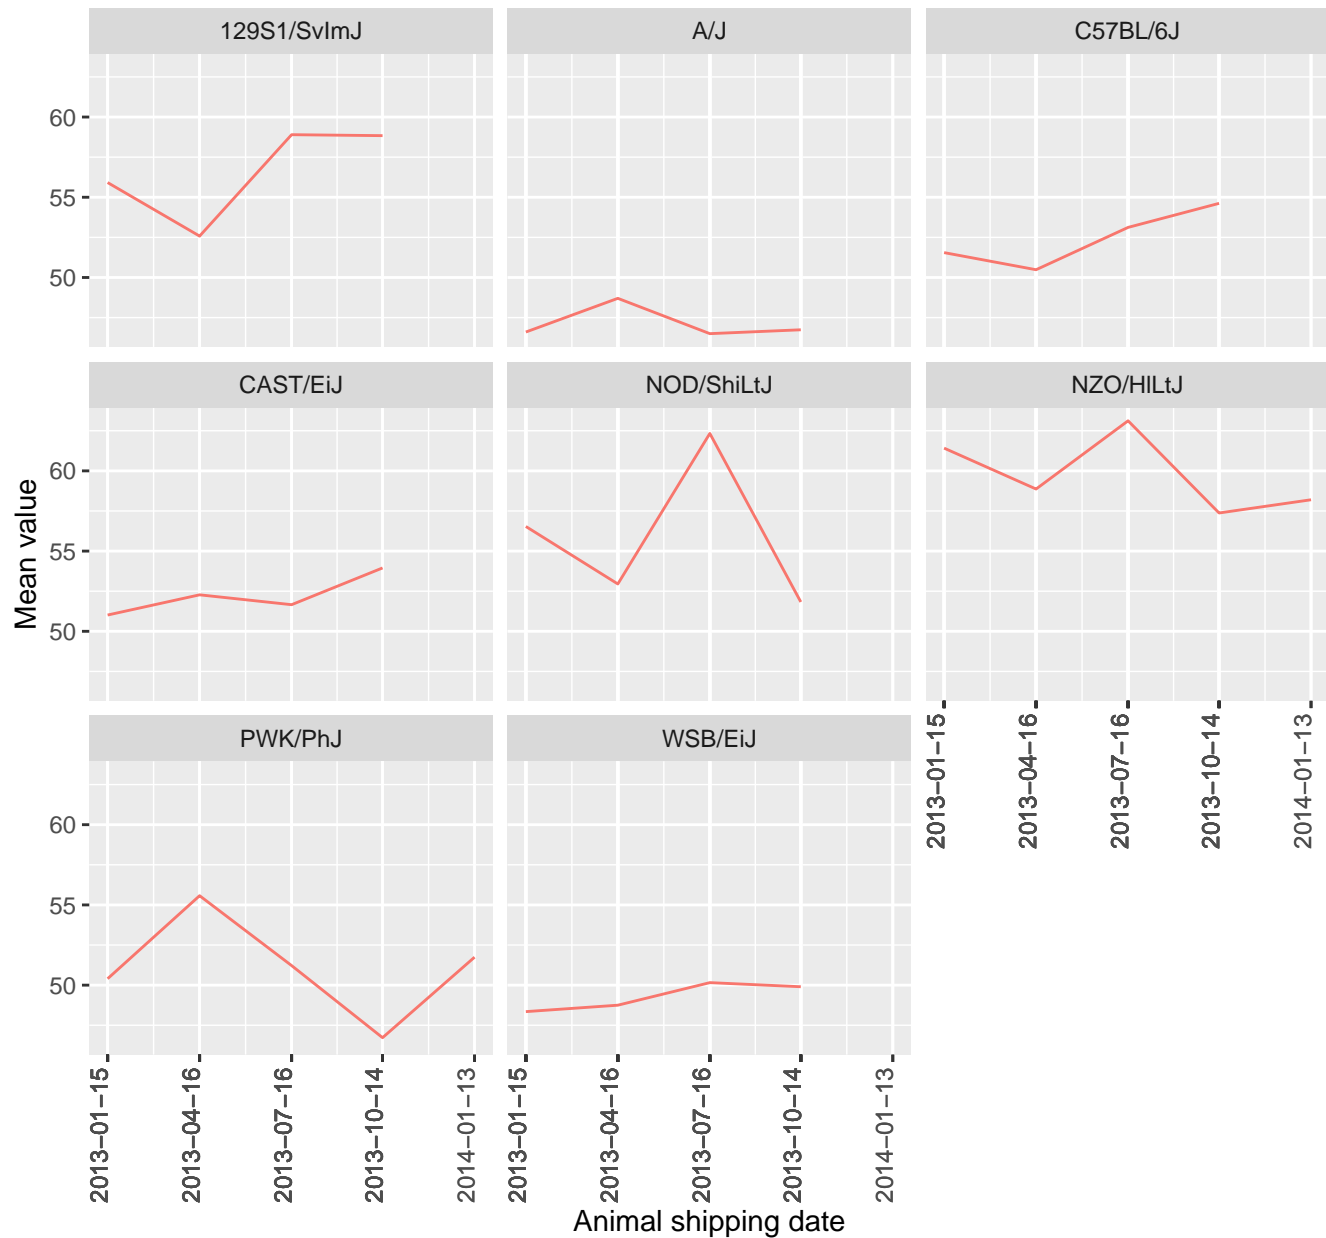

Procedure: GMC15  
Parameter: HGB

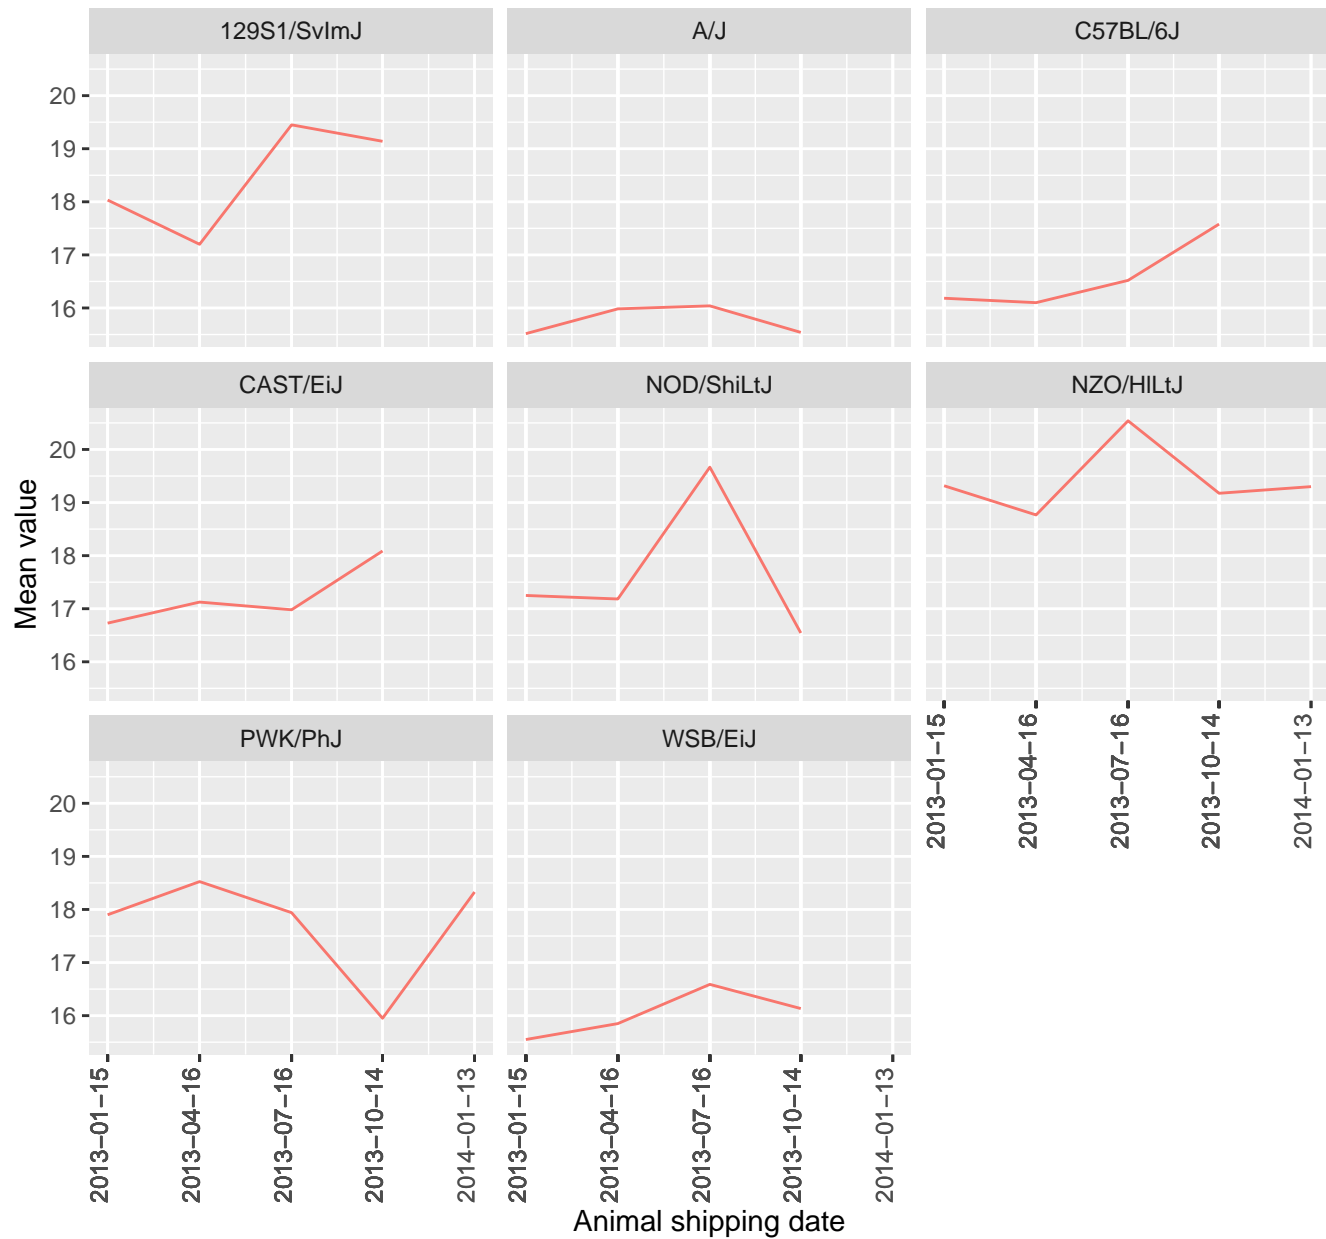

Procedure: GMC15

Parameter: MCH

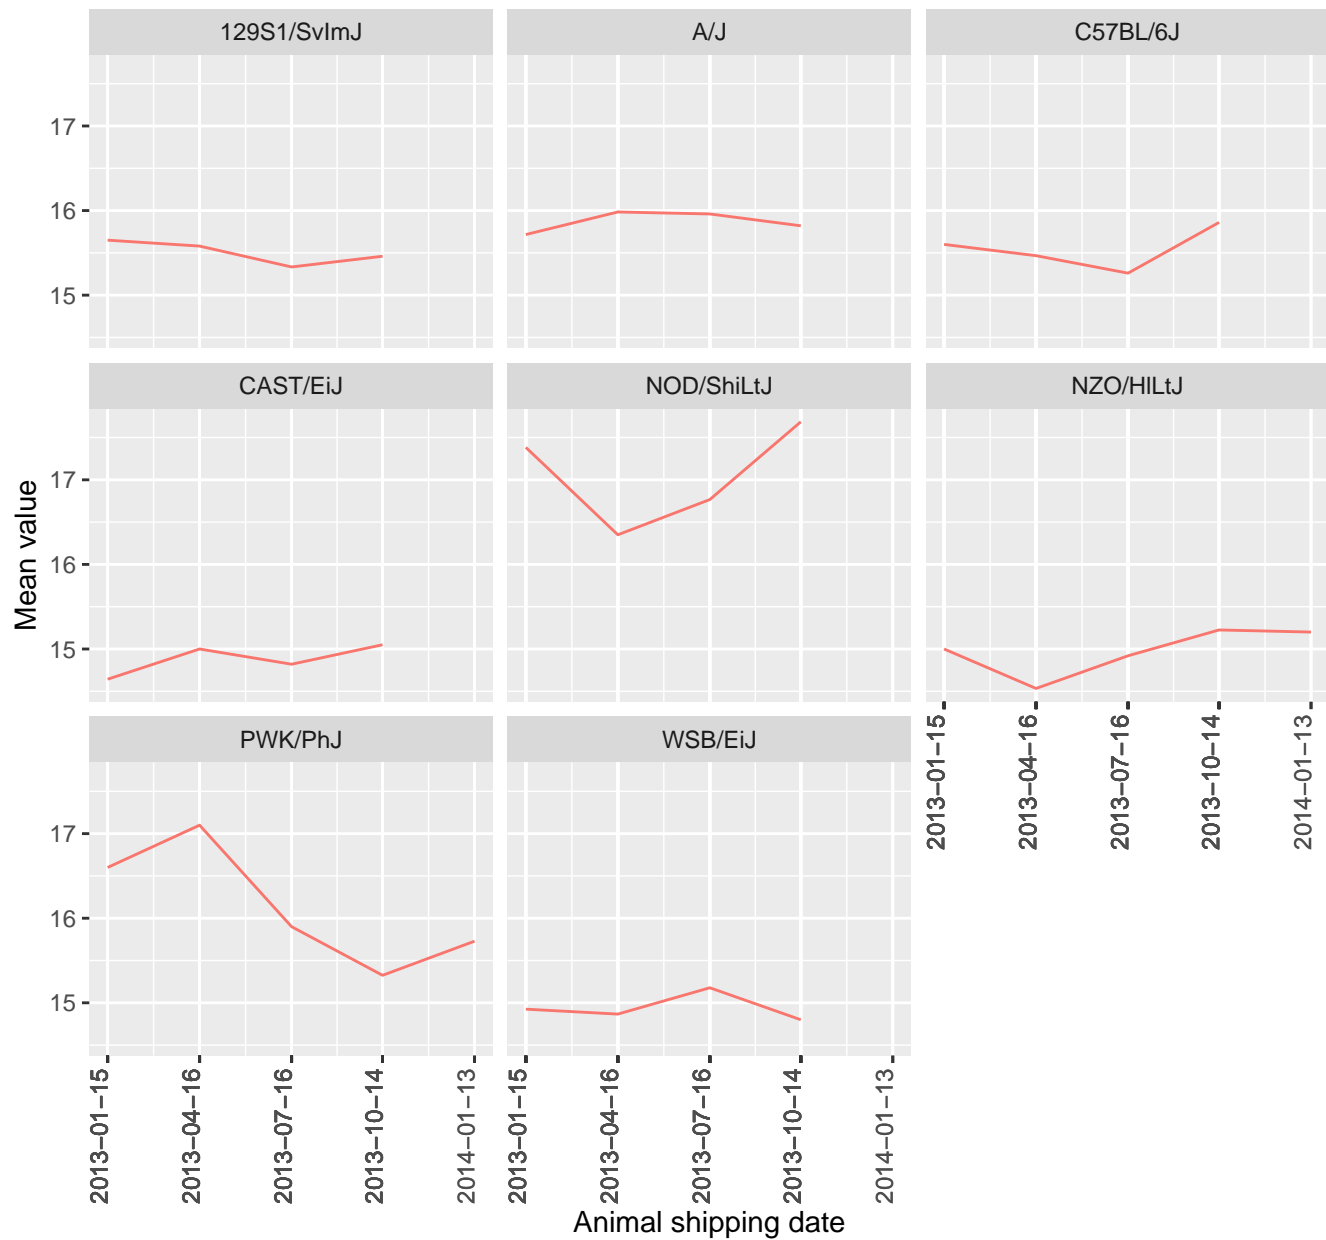

Procedure: GMC15  
Parameter: MCHC

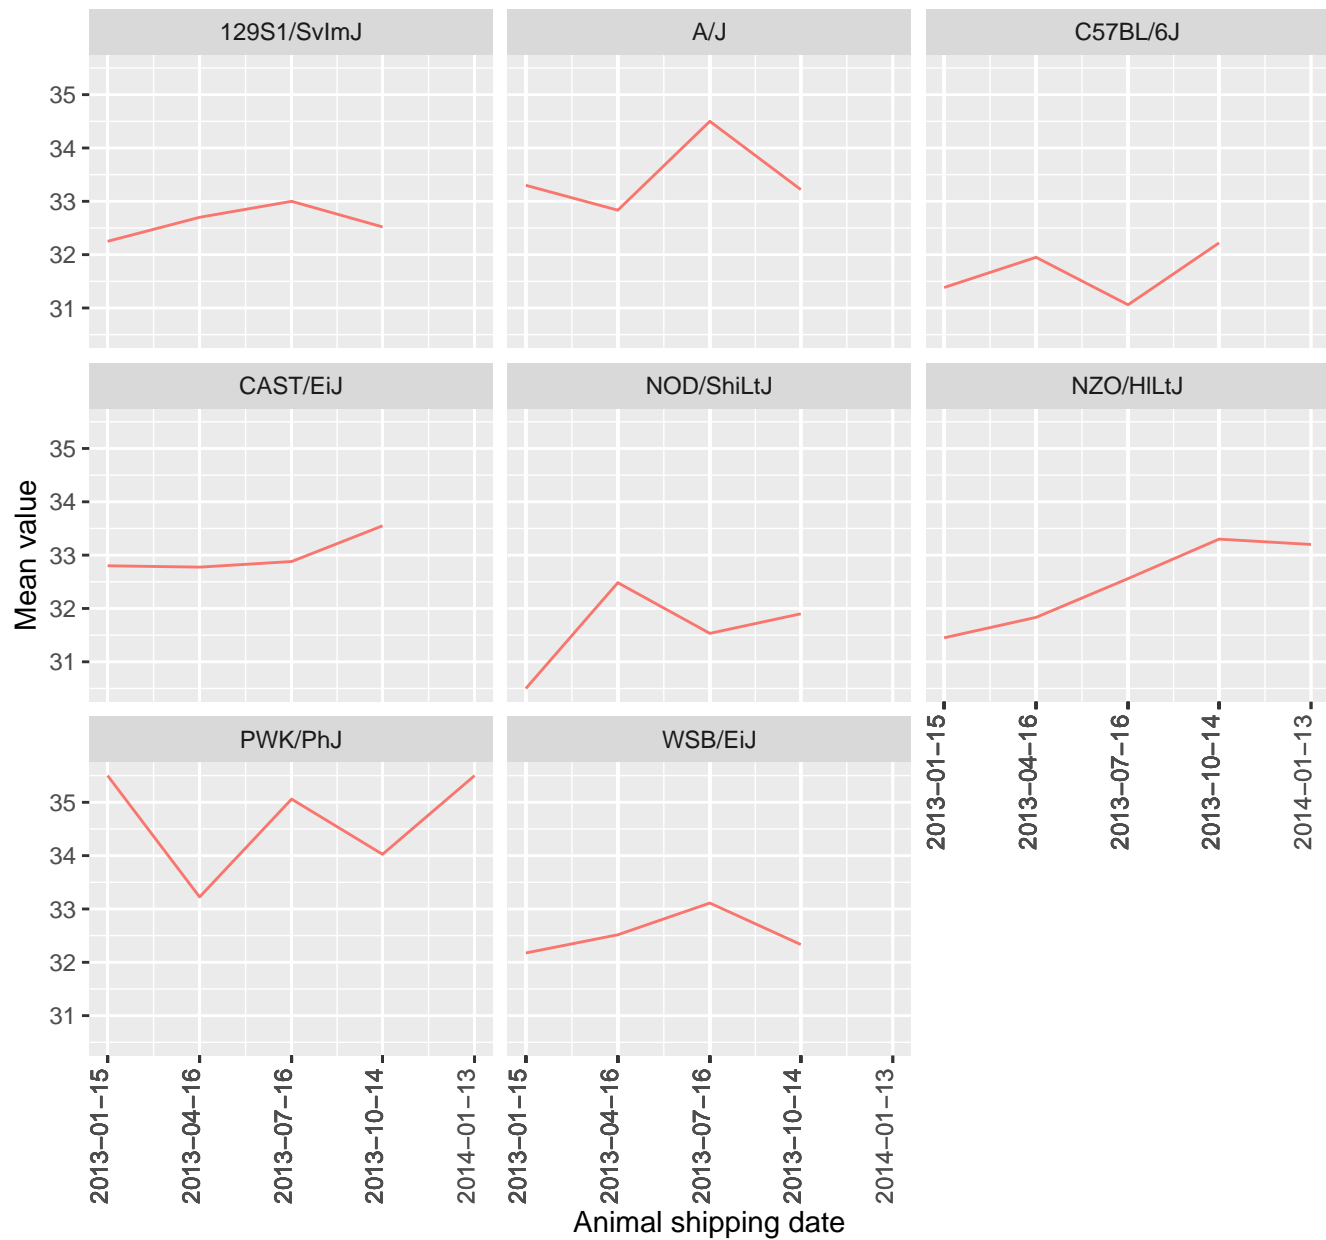

Procedure: GMC15  
Parameter: MCV

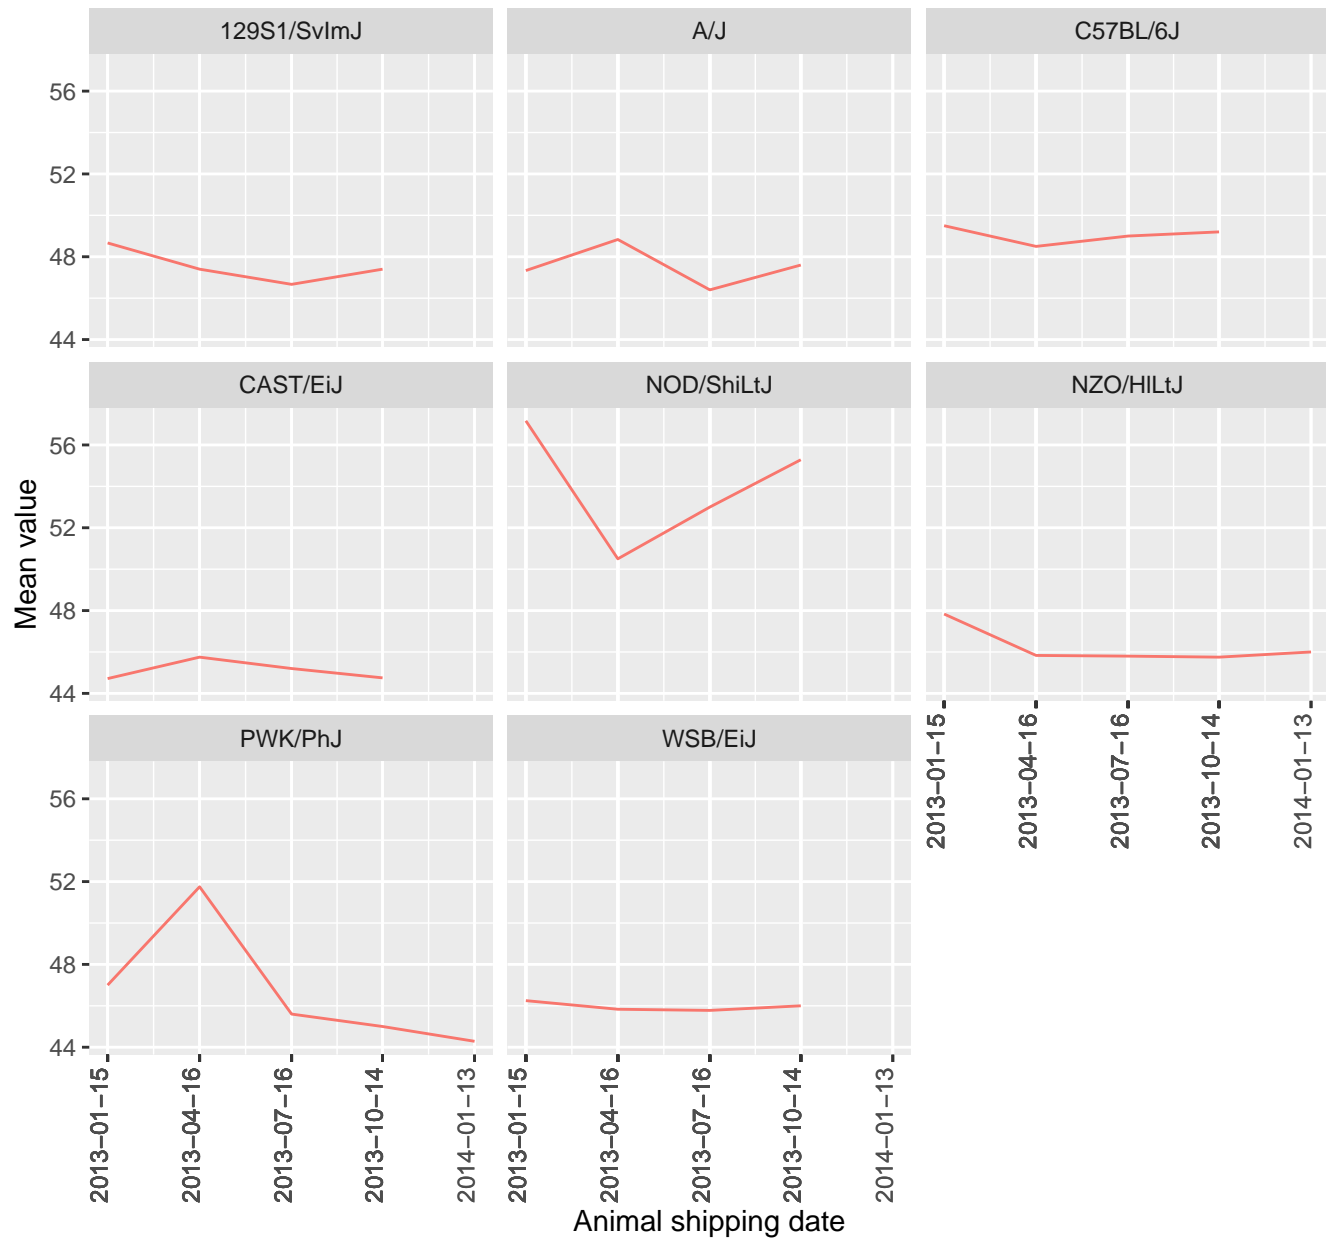

Procedure: GMC15  
Parameter: MPV

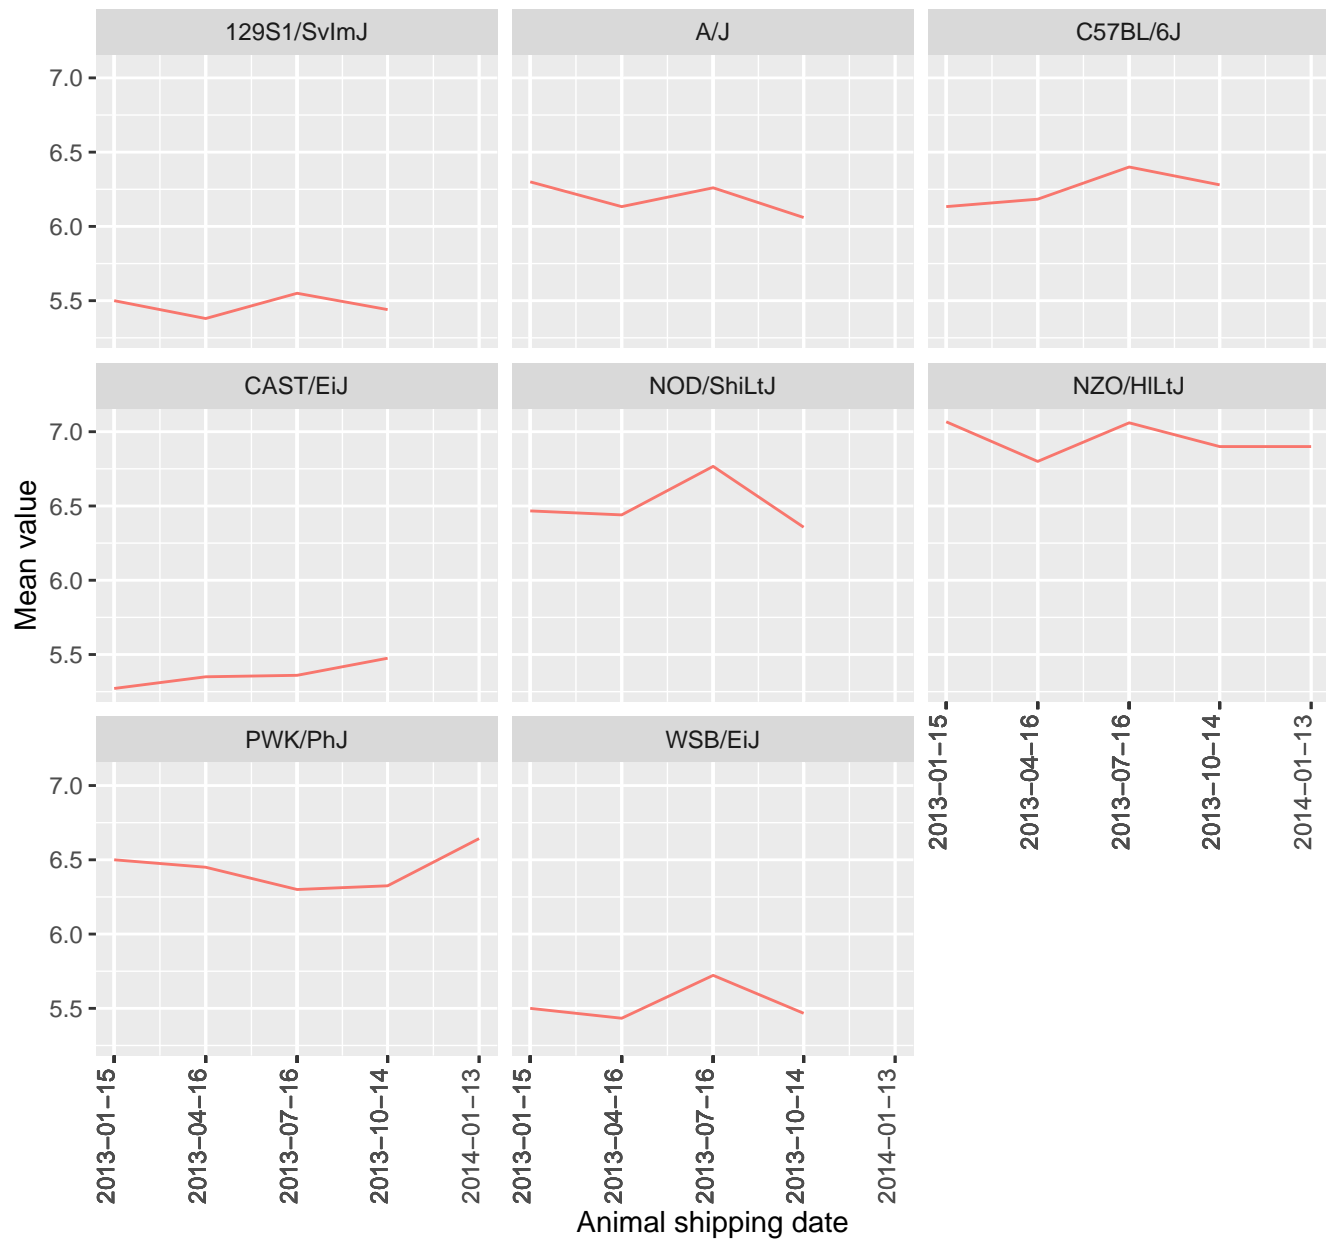



Procedure: GMC15  
Parameter: PCT

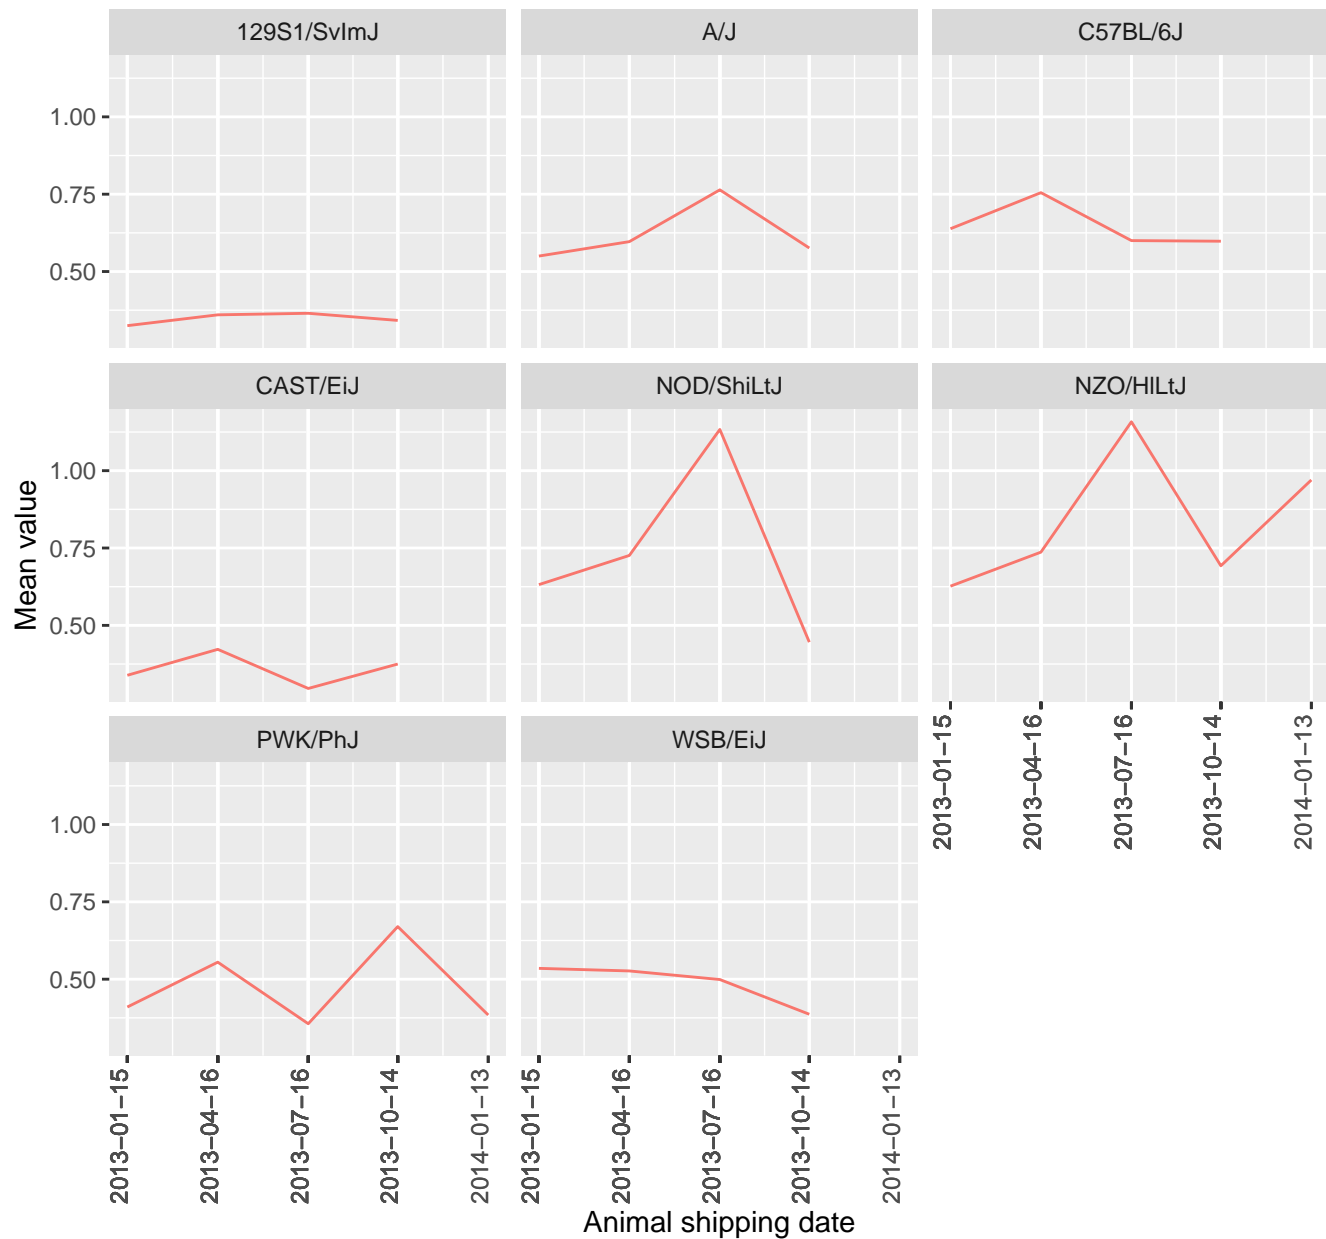

Procedure: GMC15

Parameter: PDW

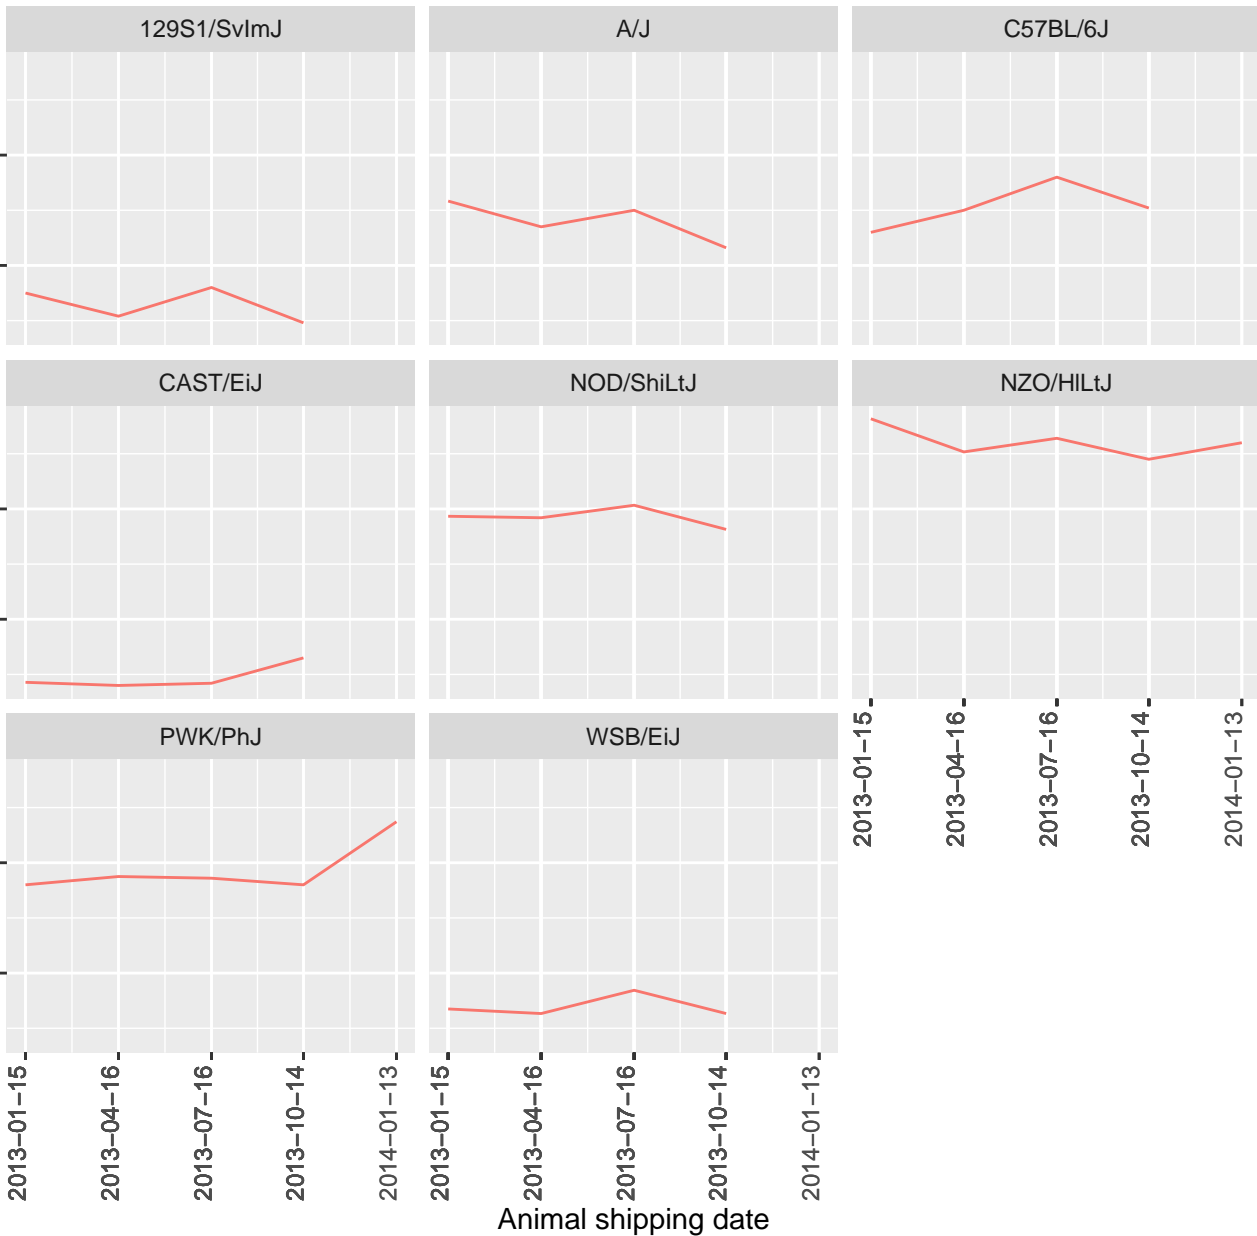

Procedure: GMC15

Parameter: PLCR

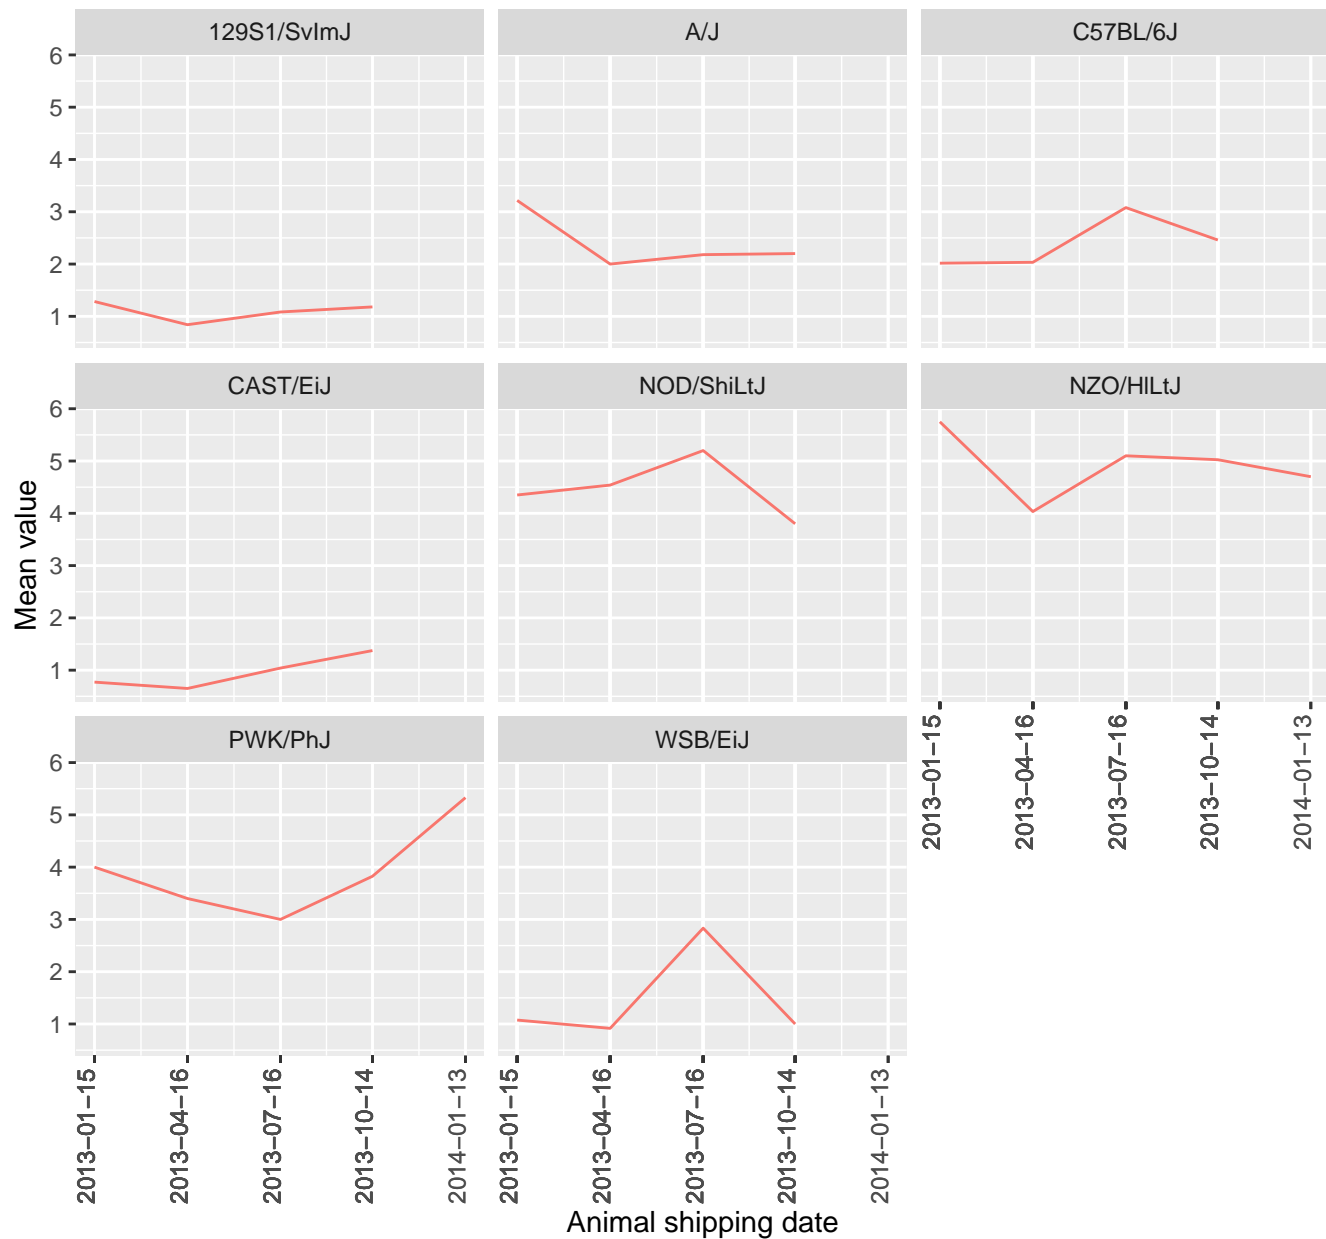

Procedure: GMC15  
Parameter: PLT

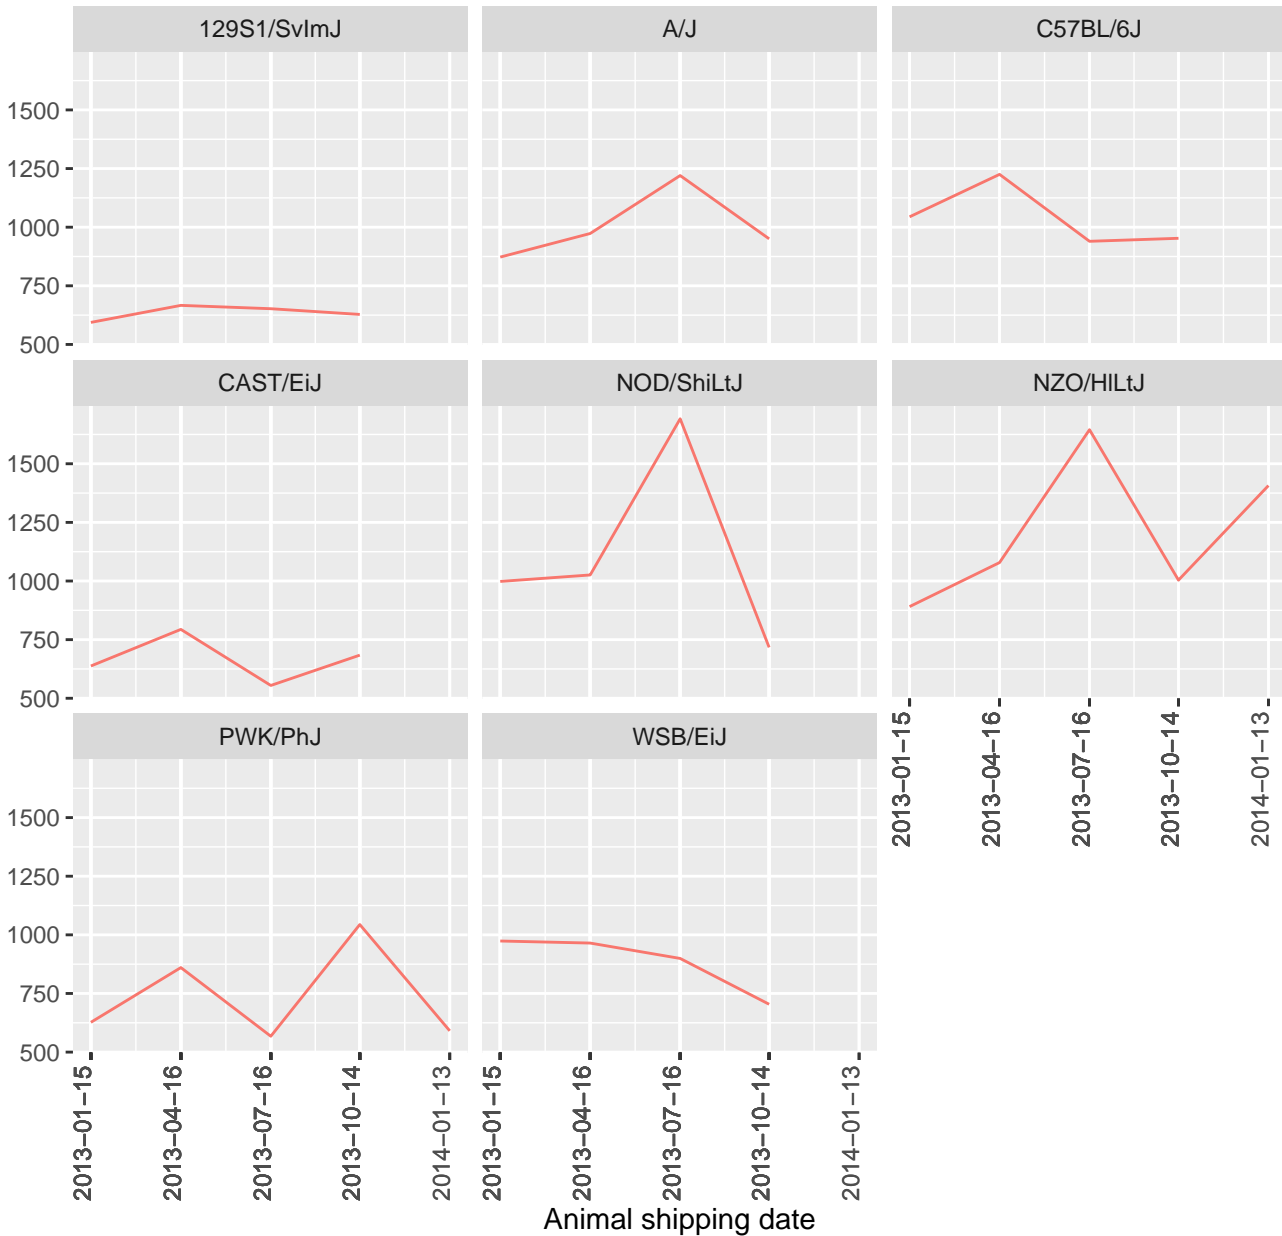

Procedure: GMC15

Parameter: RBC

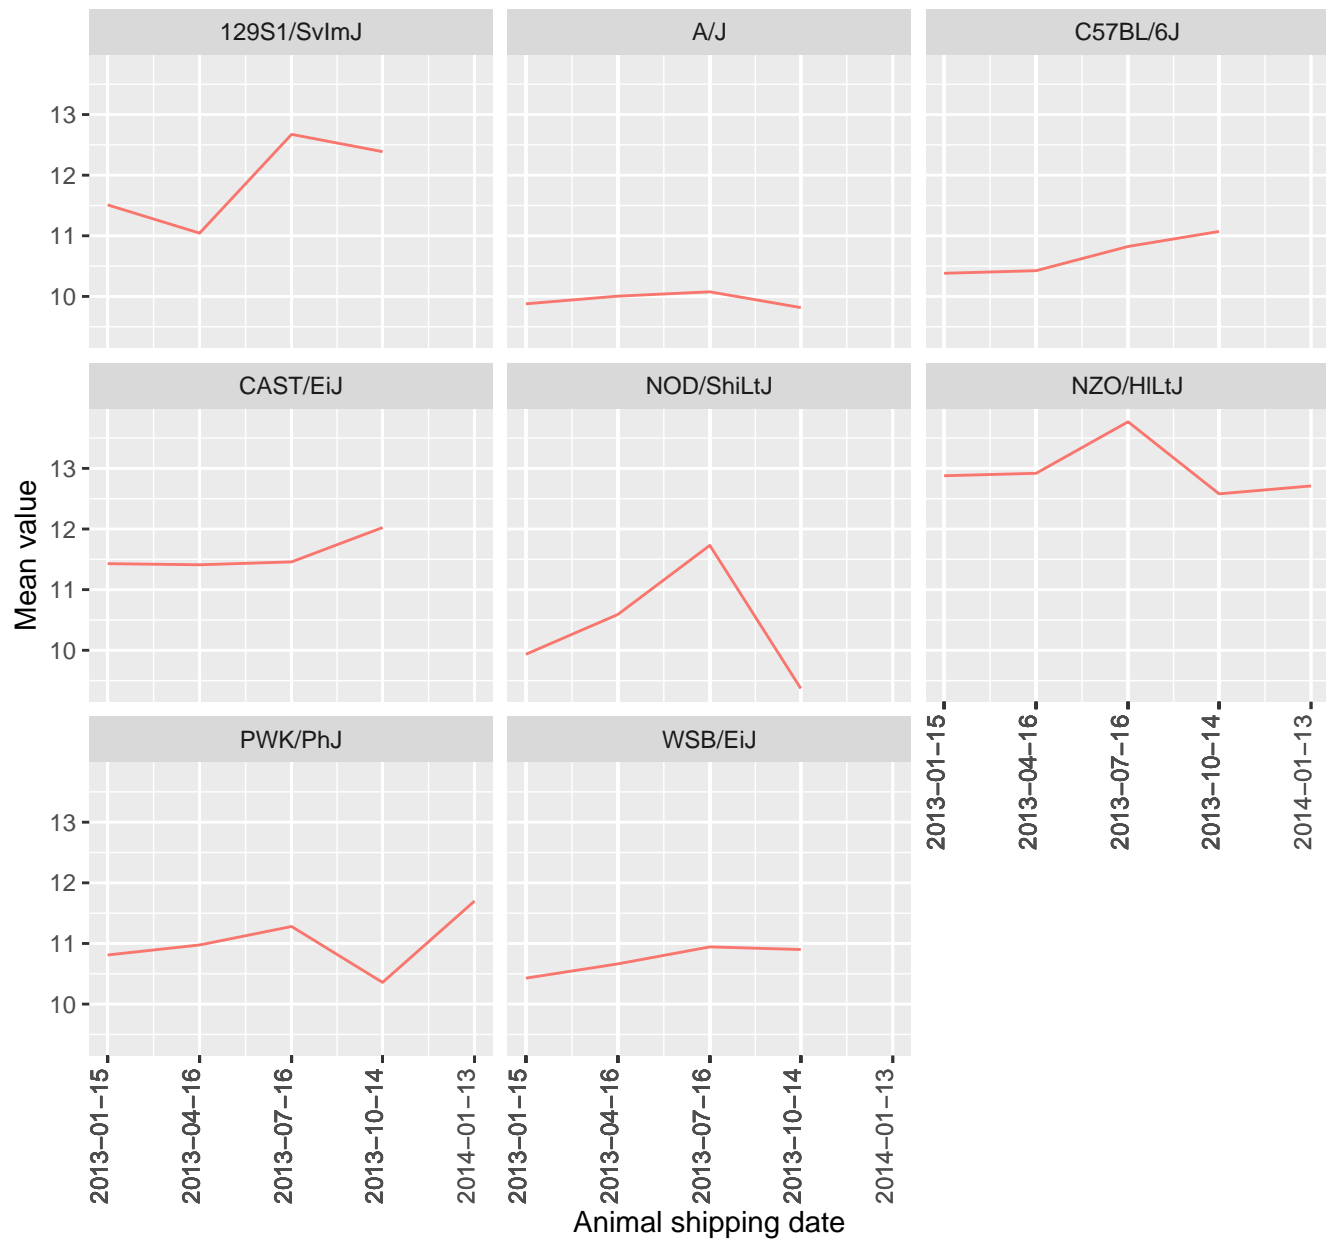

Procedure: GMC15  
Parameter: RDW

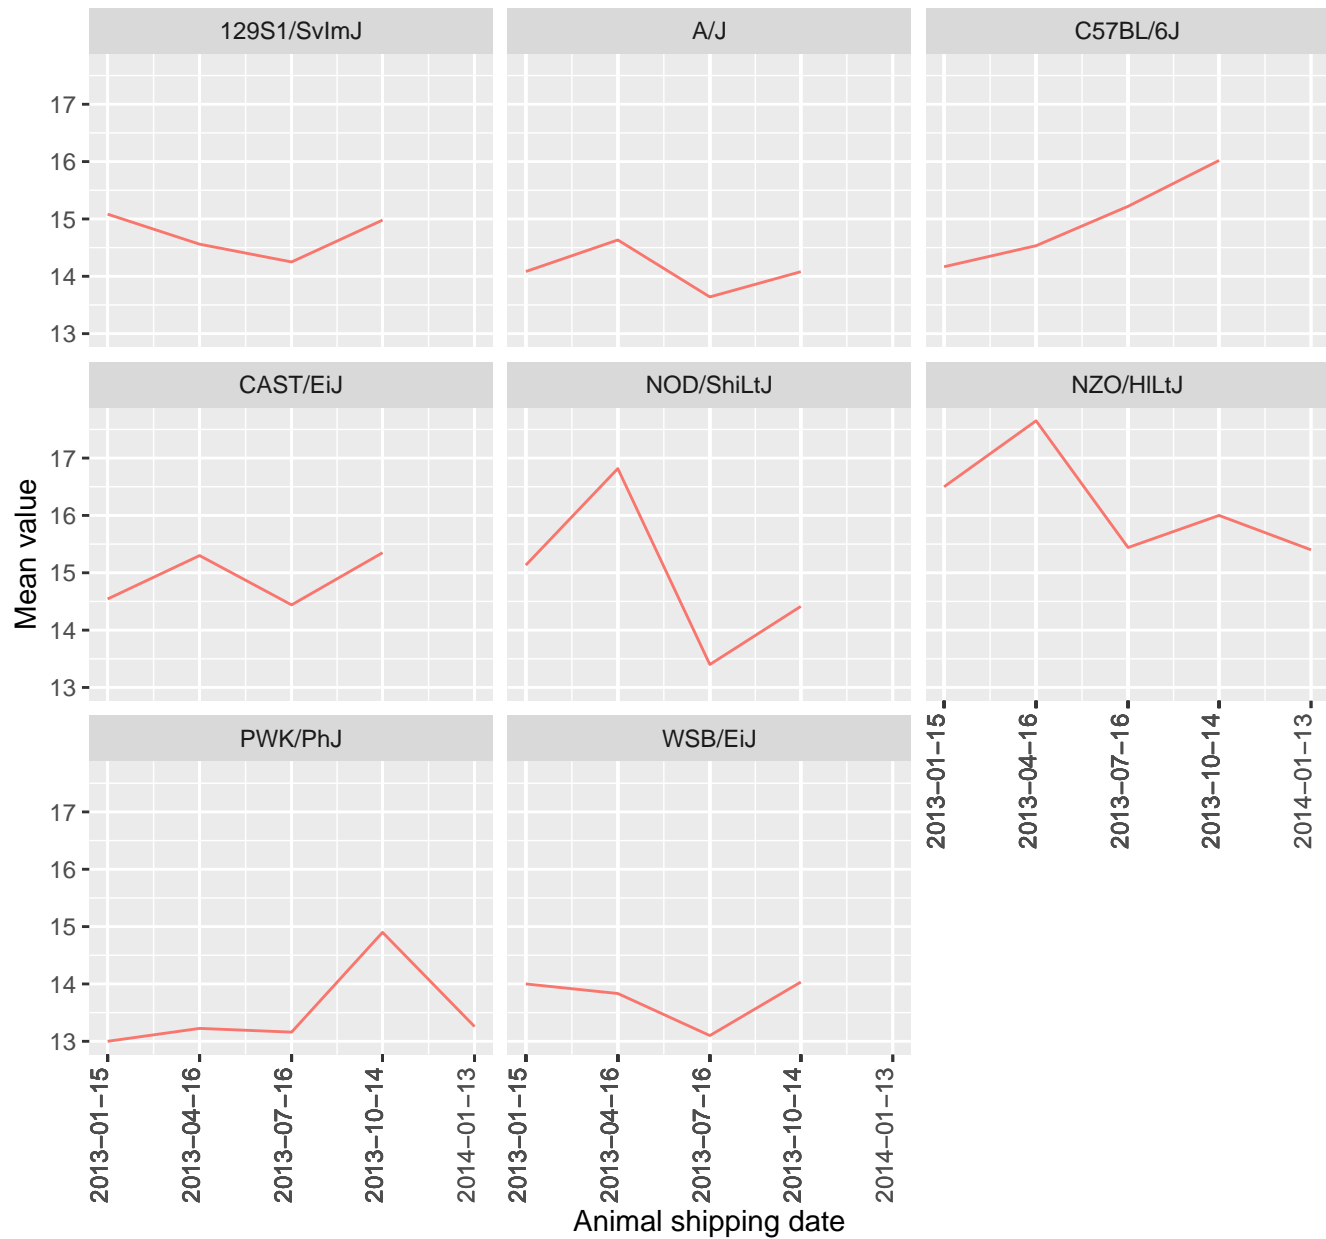

Procedure: GMC15

Parameter: WBC

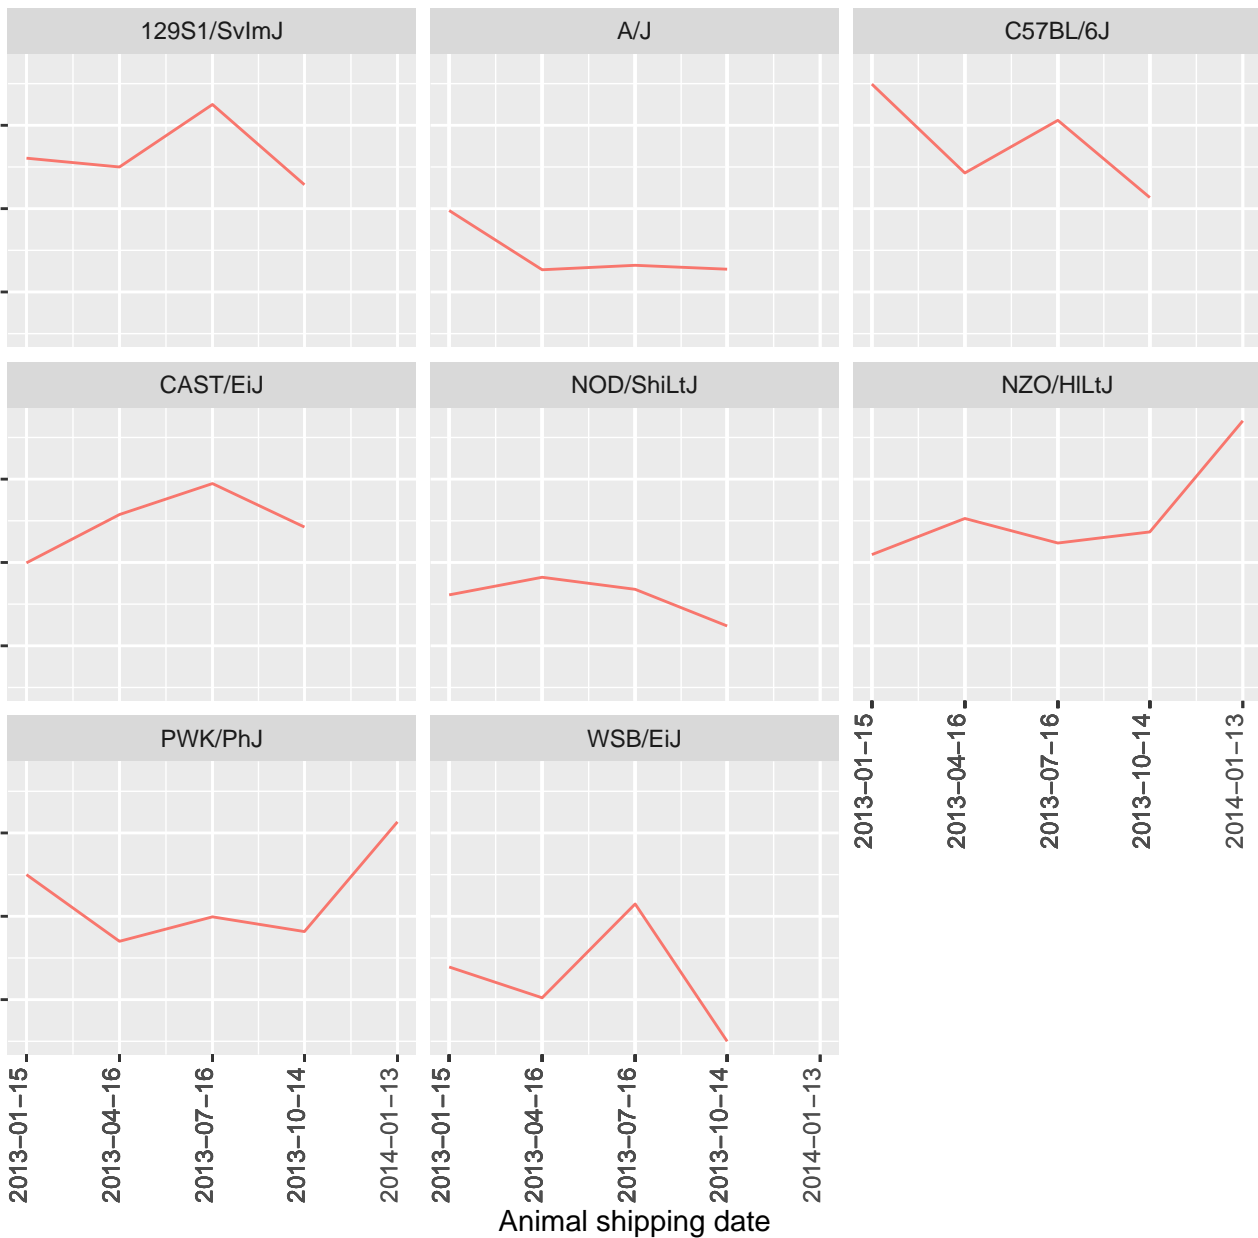

Procedure: GMC16  
Parameter: albumin\_17

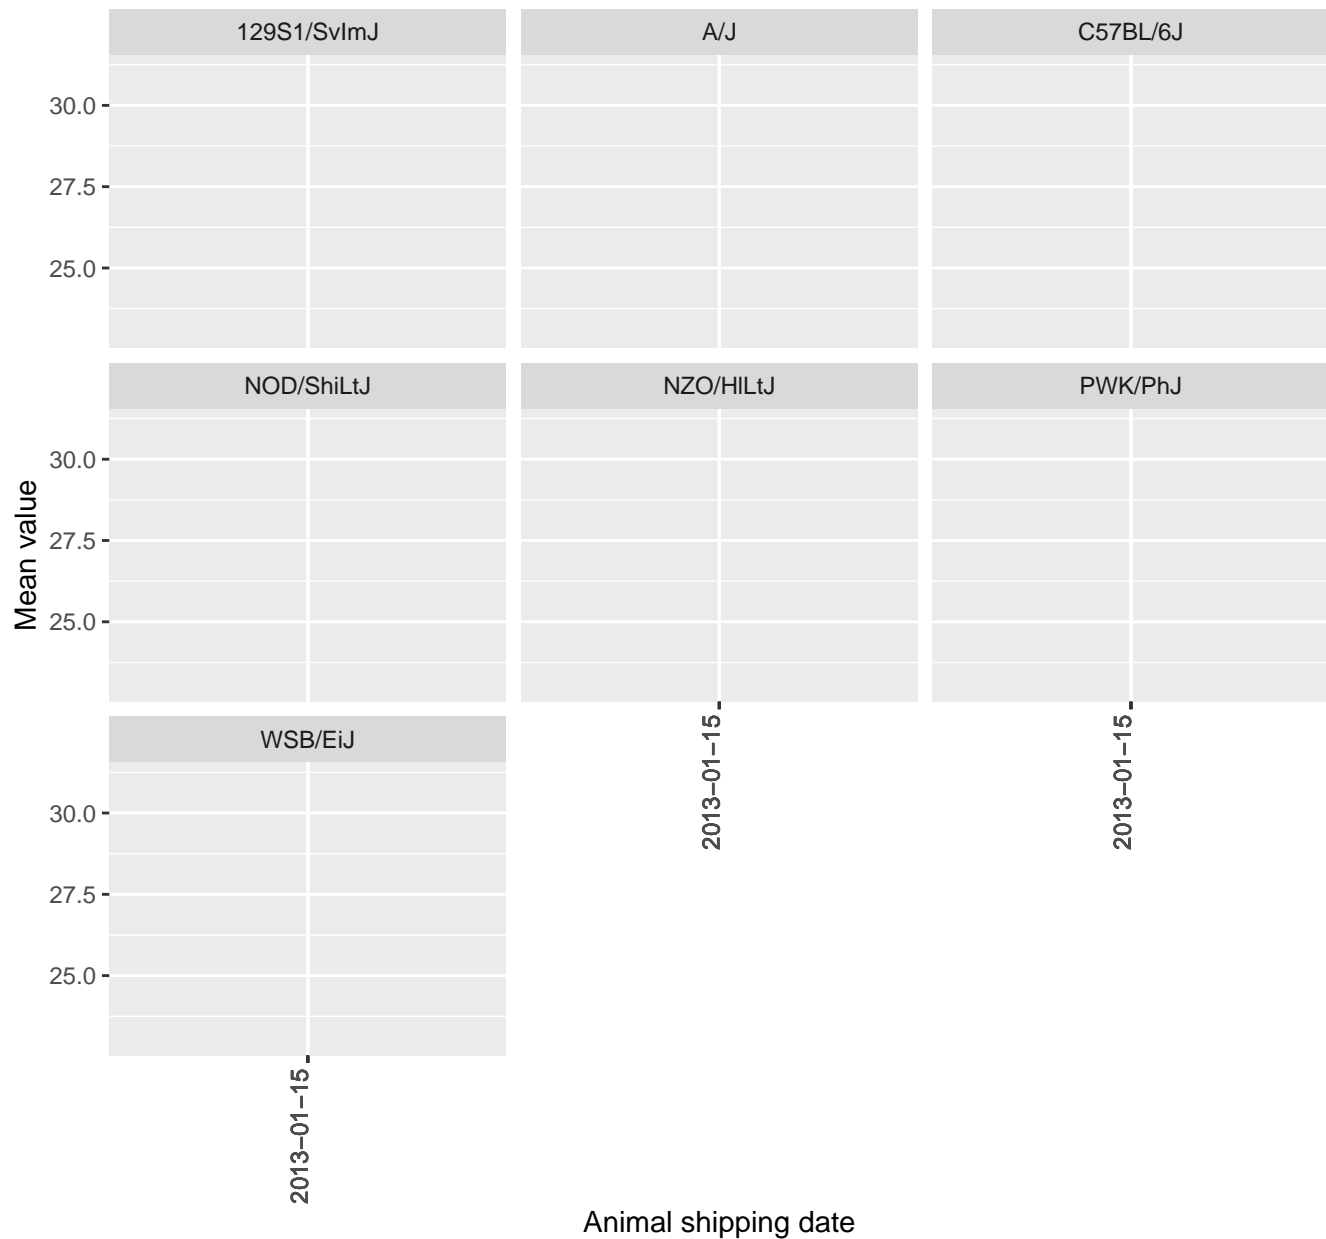



Procedure: GMC16  
Parameter: albumin\_21

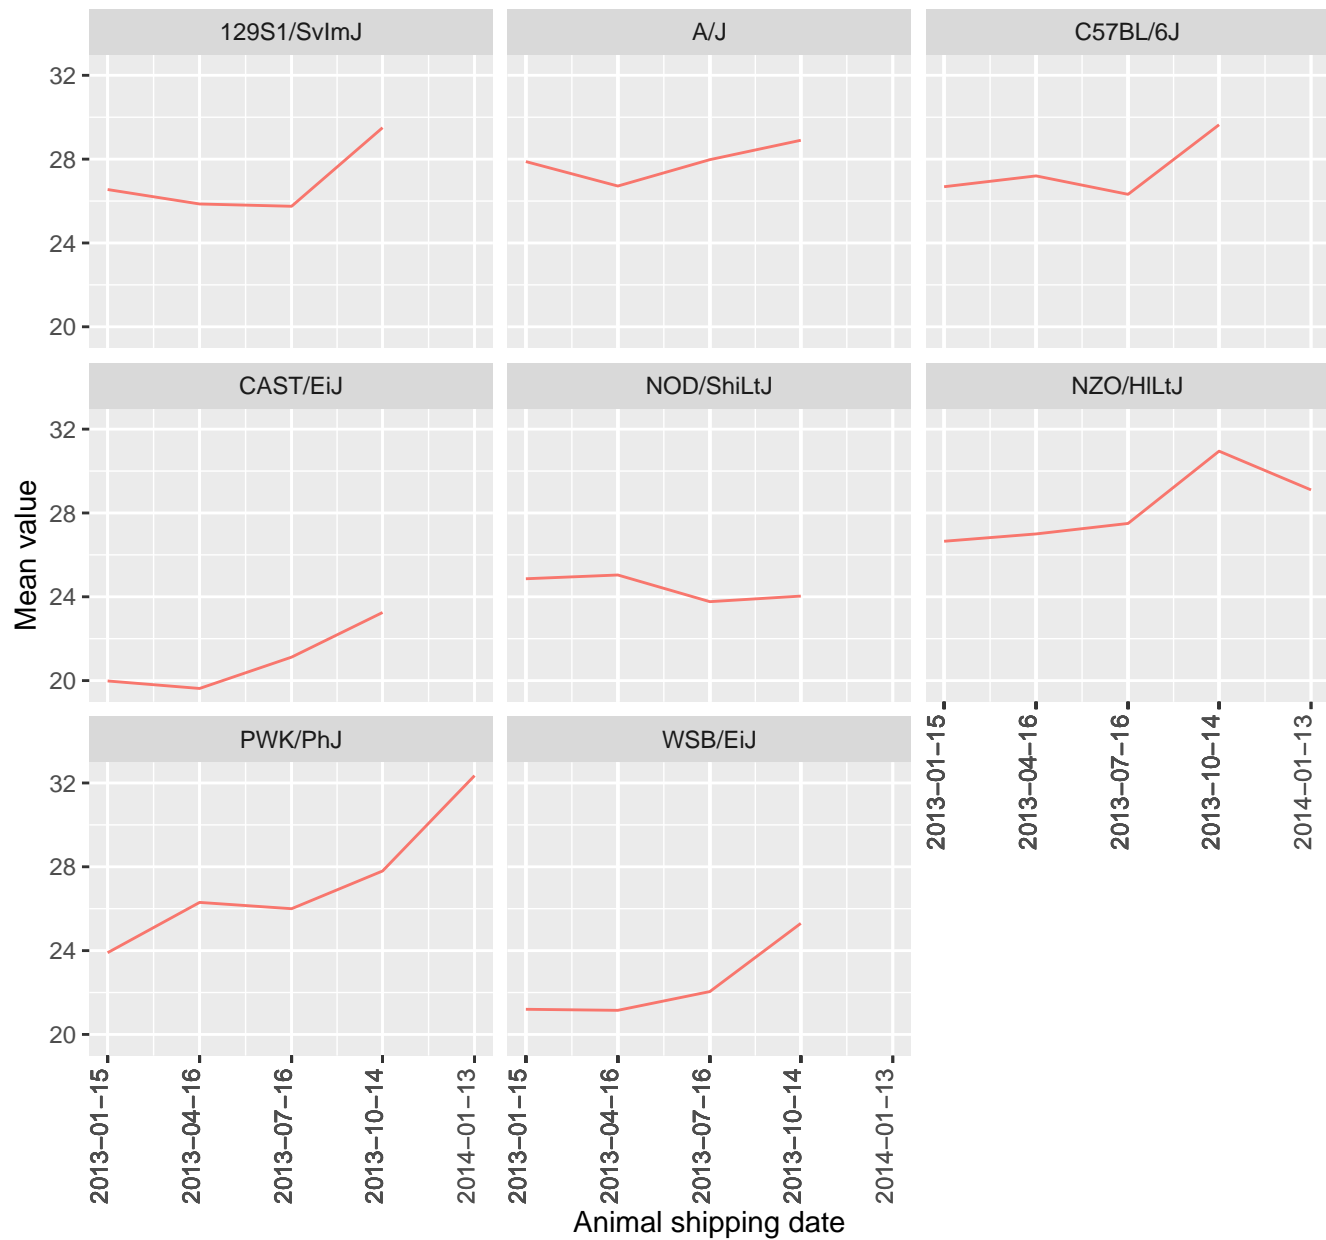

Procedure: GMC16  
Parameter: ALP\_17

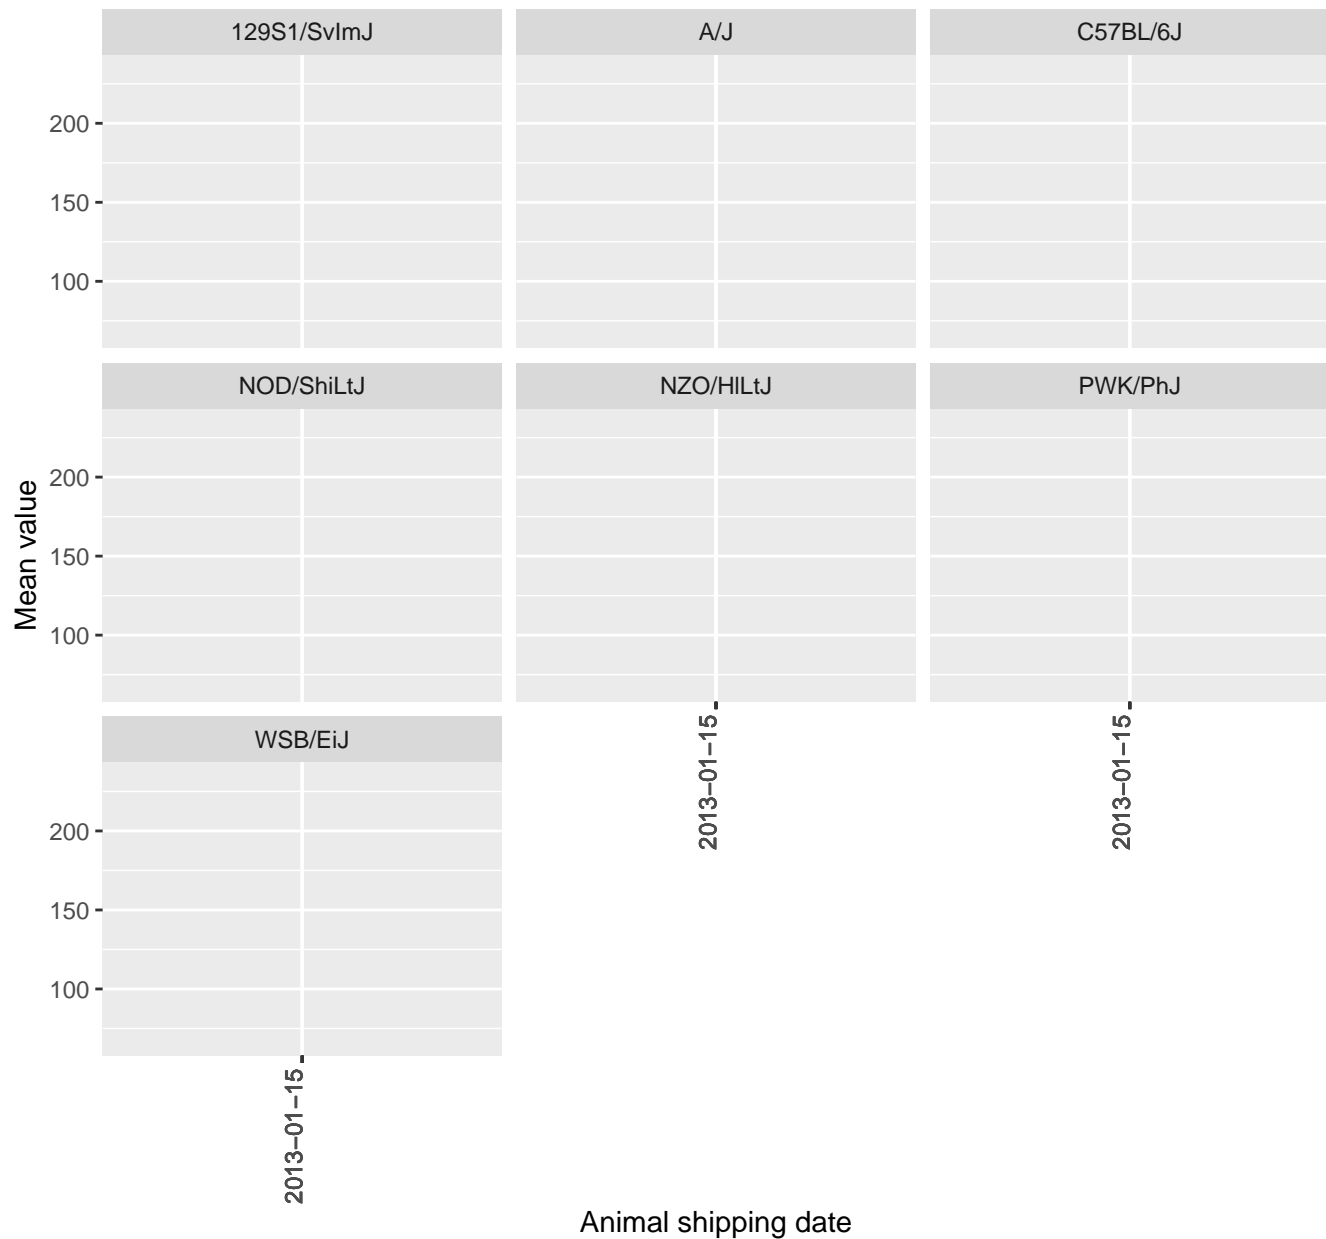

Procedure: GMC16  
Parameter: ALP\_21

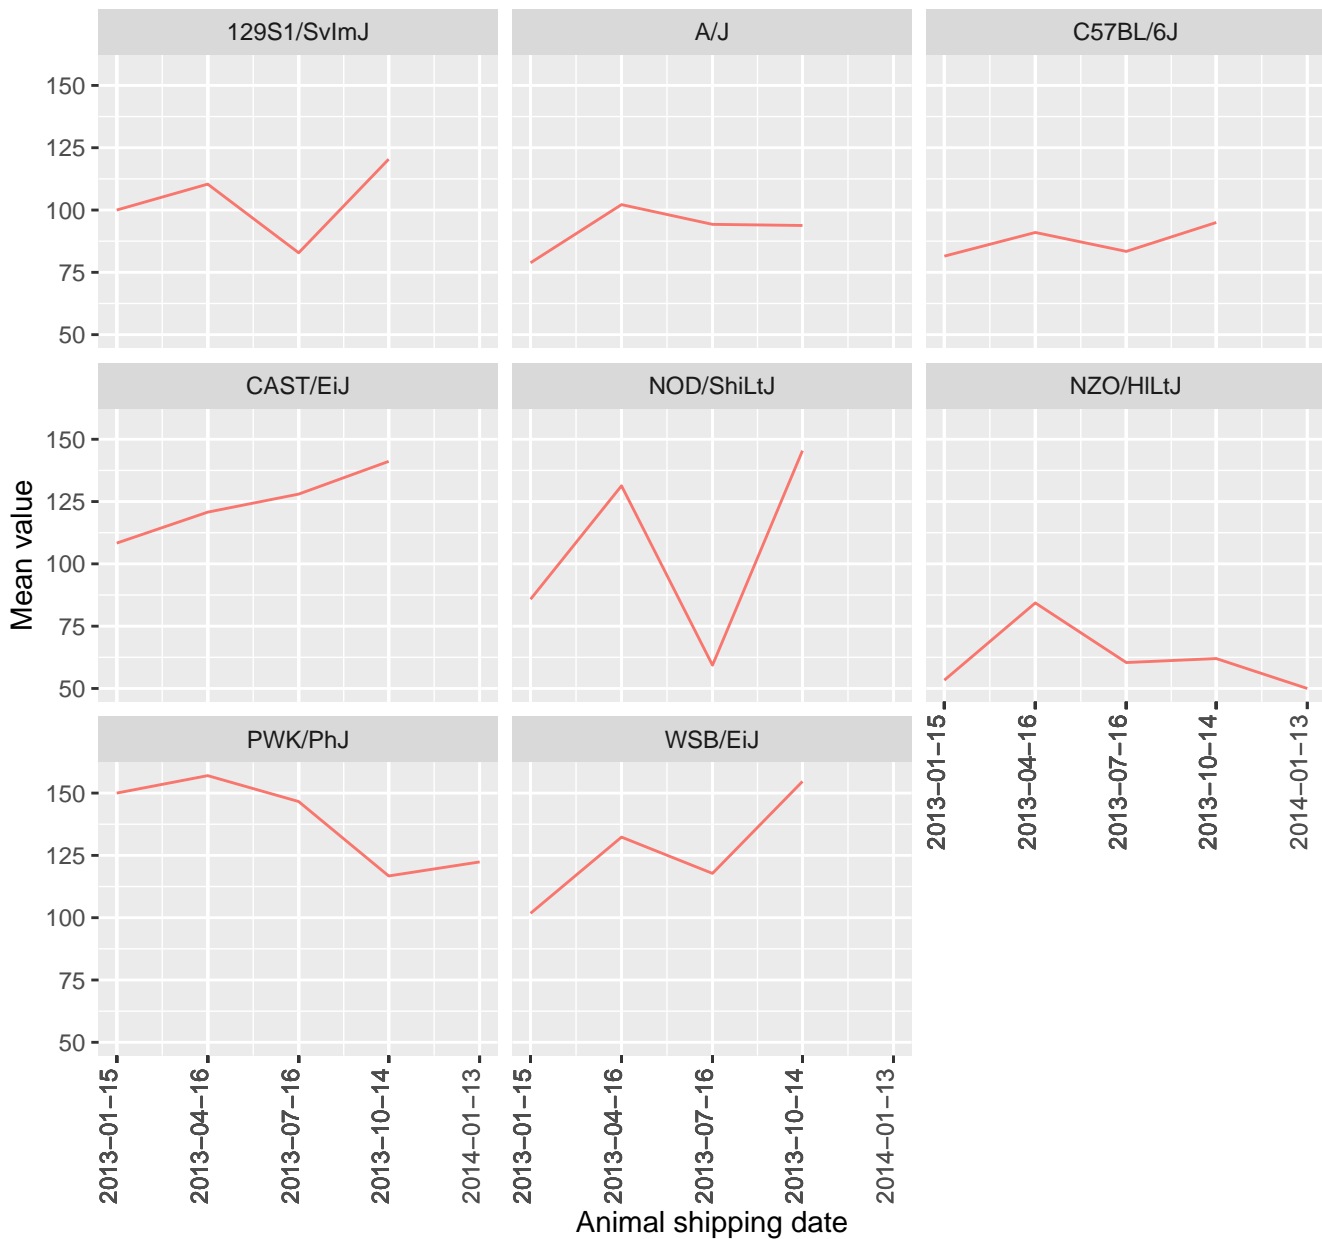

Procedure: GMC16  
Parameter: ALT\_17

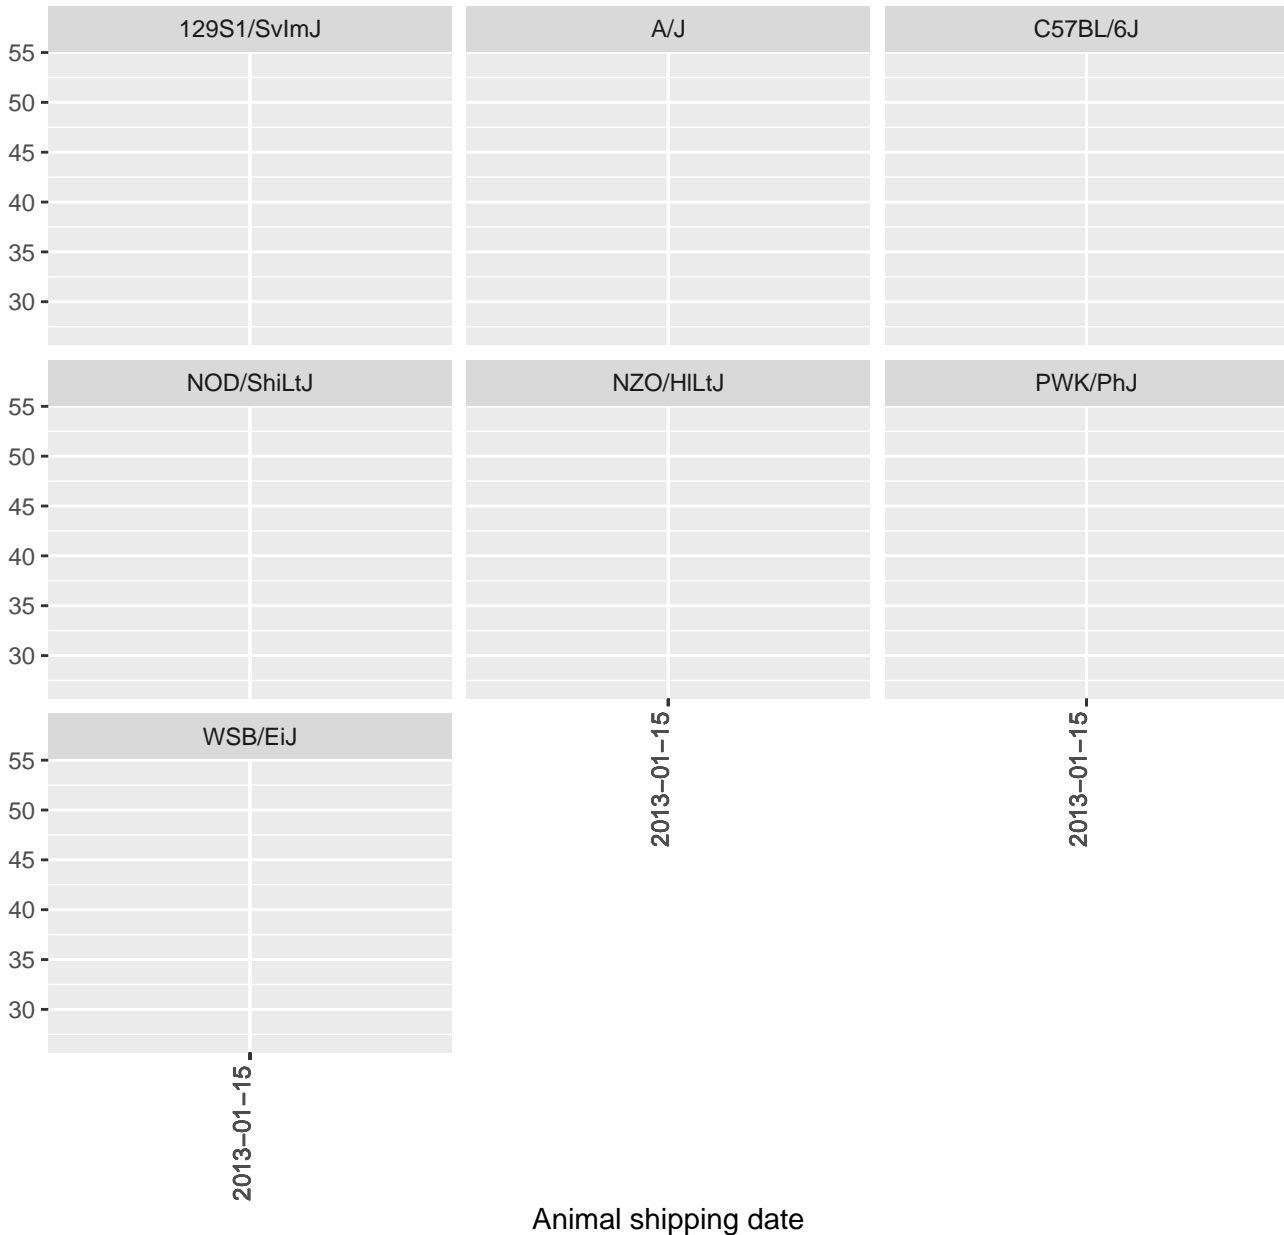

Procedure: GMC16  
Parameter: ALT\_21

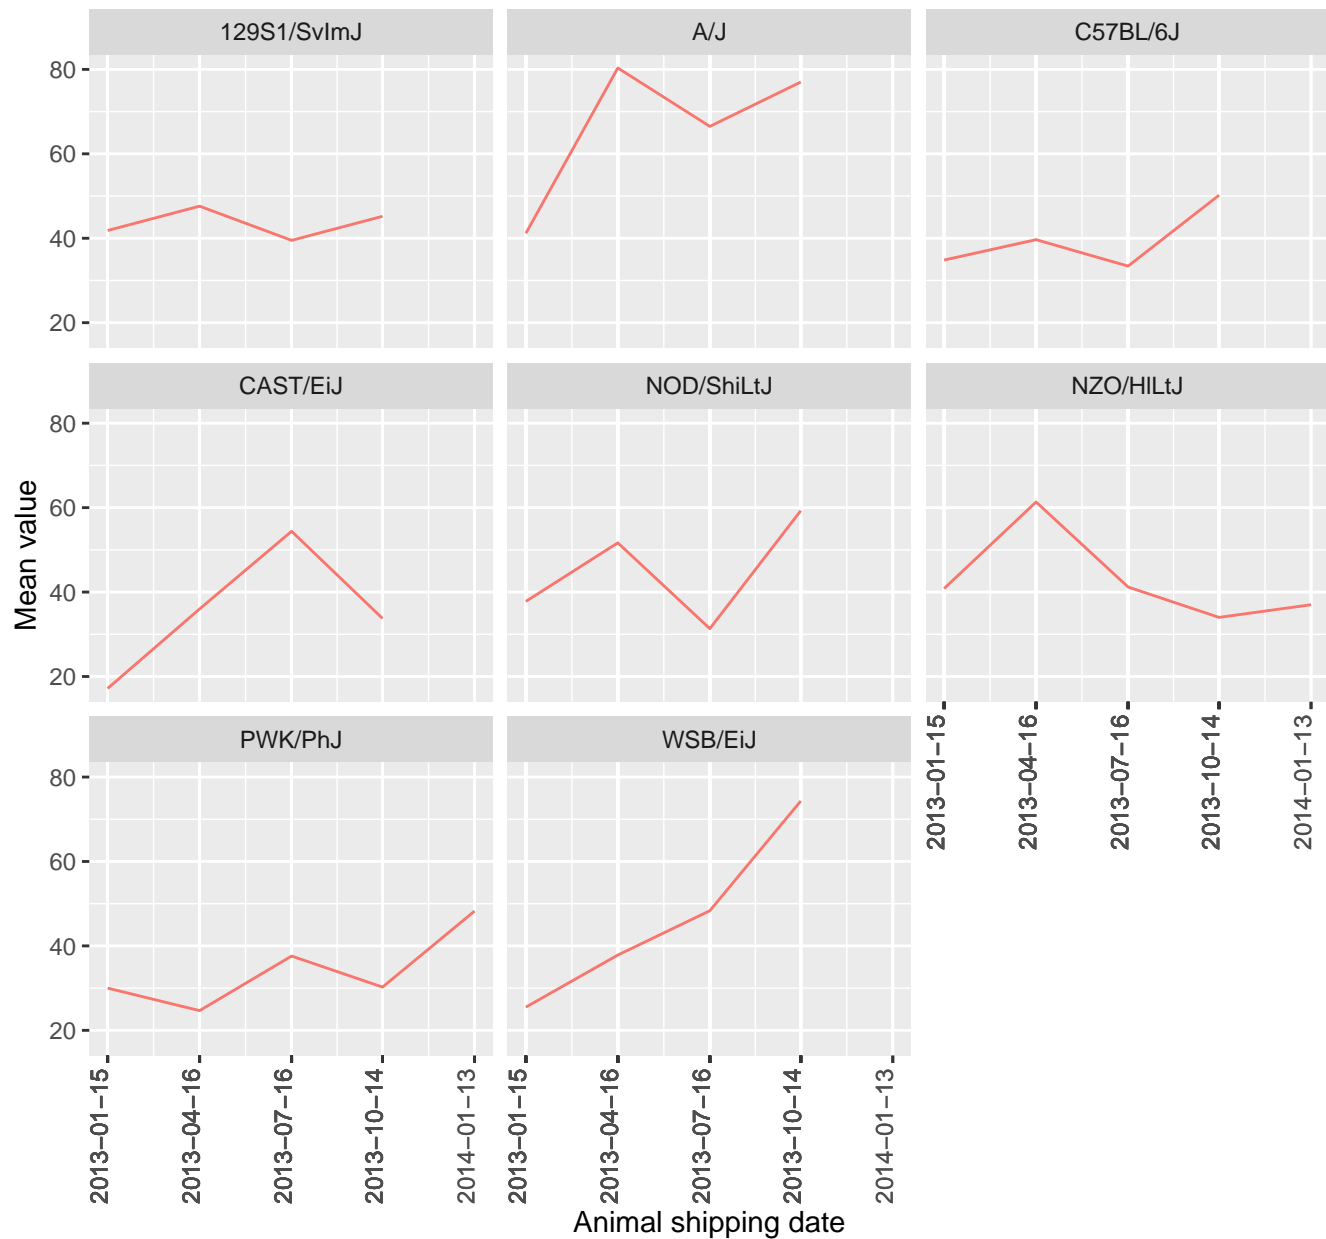

Procedure: GMC16  
Parameter: amylase\_17

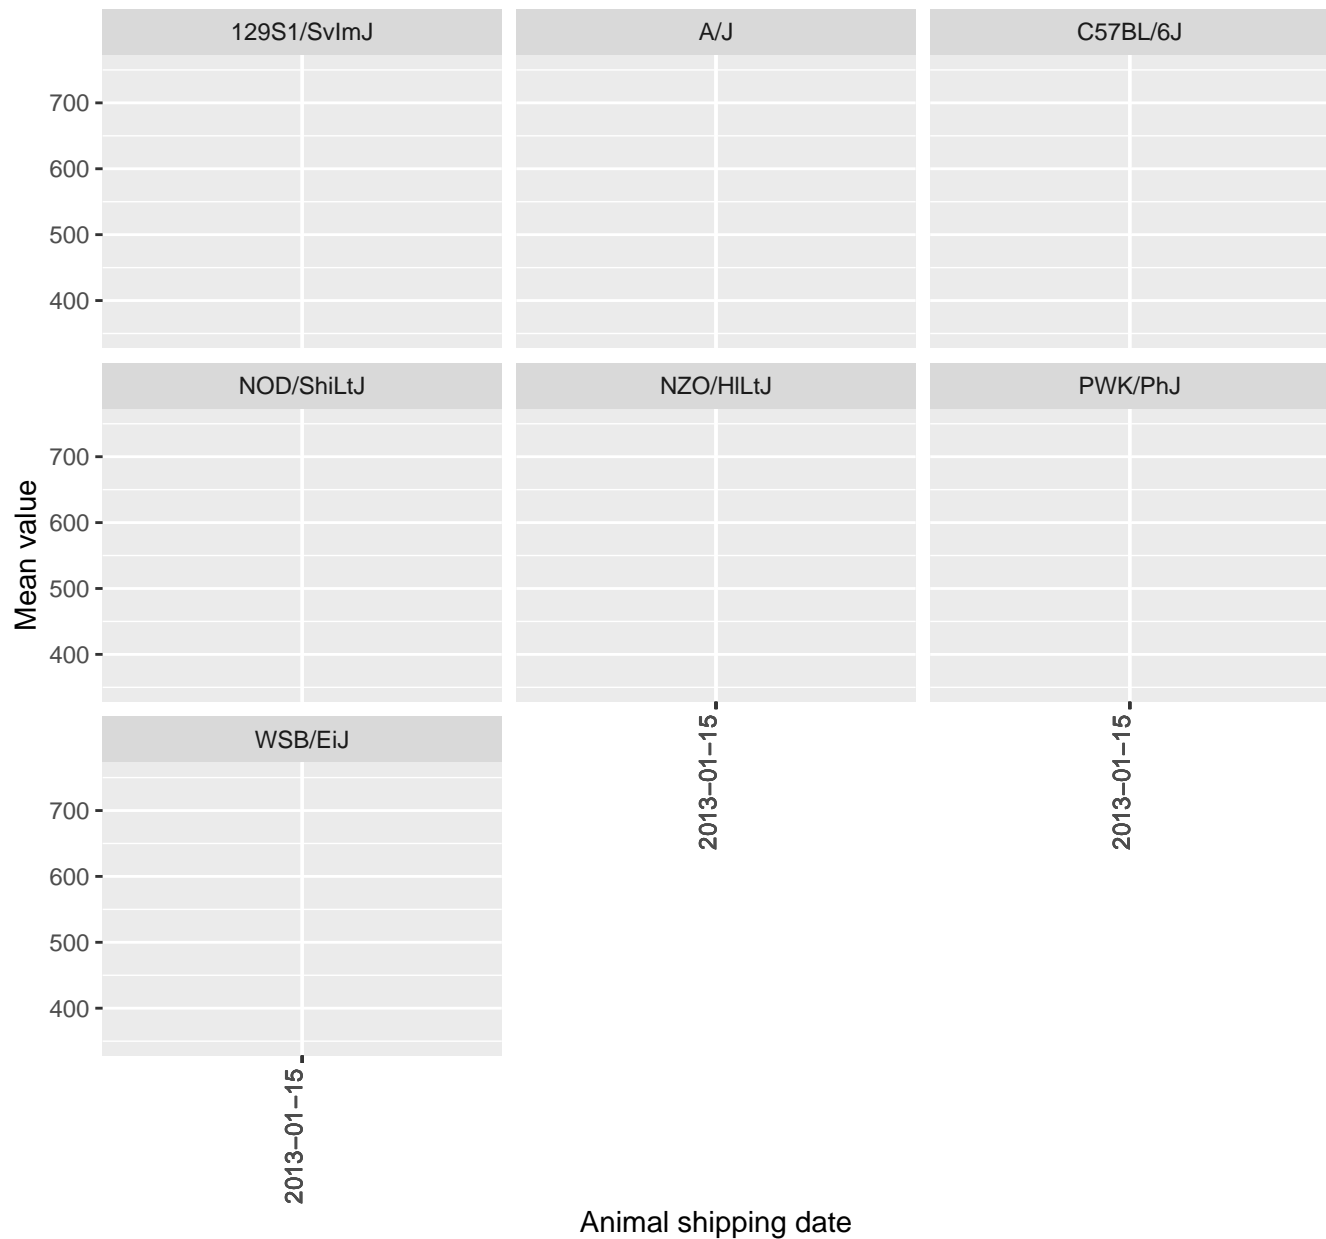

Procedure: GMC16  
Parameter: amylase\_21

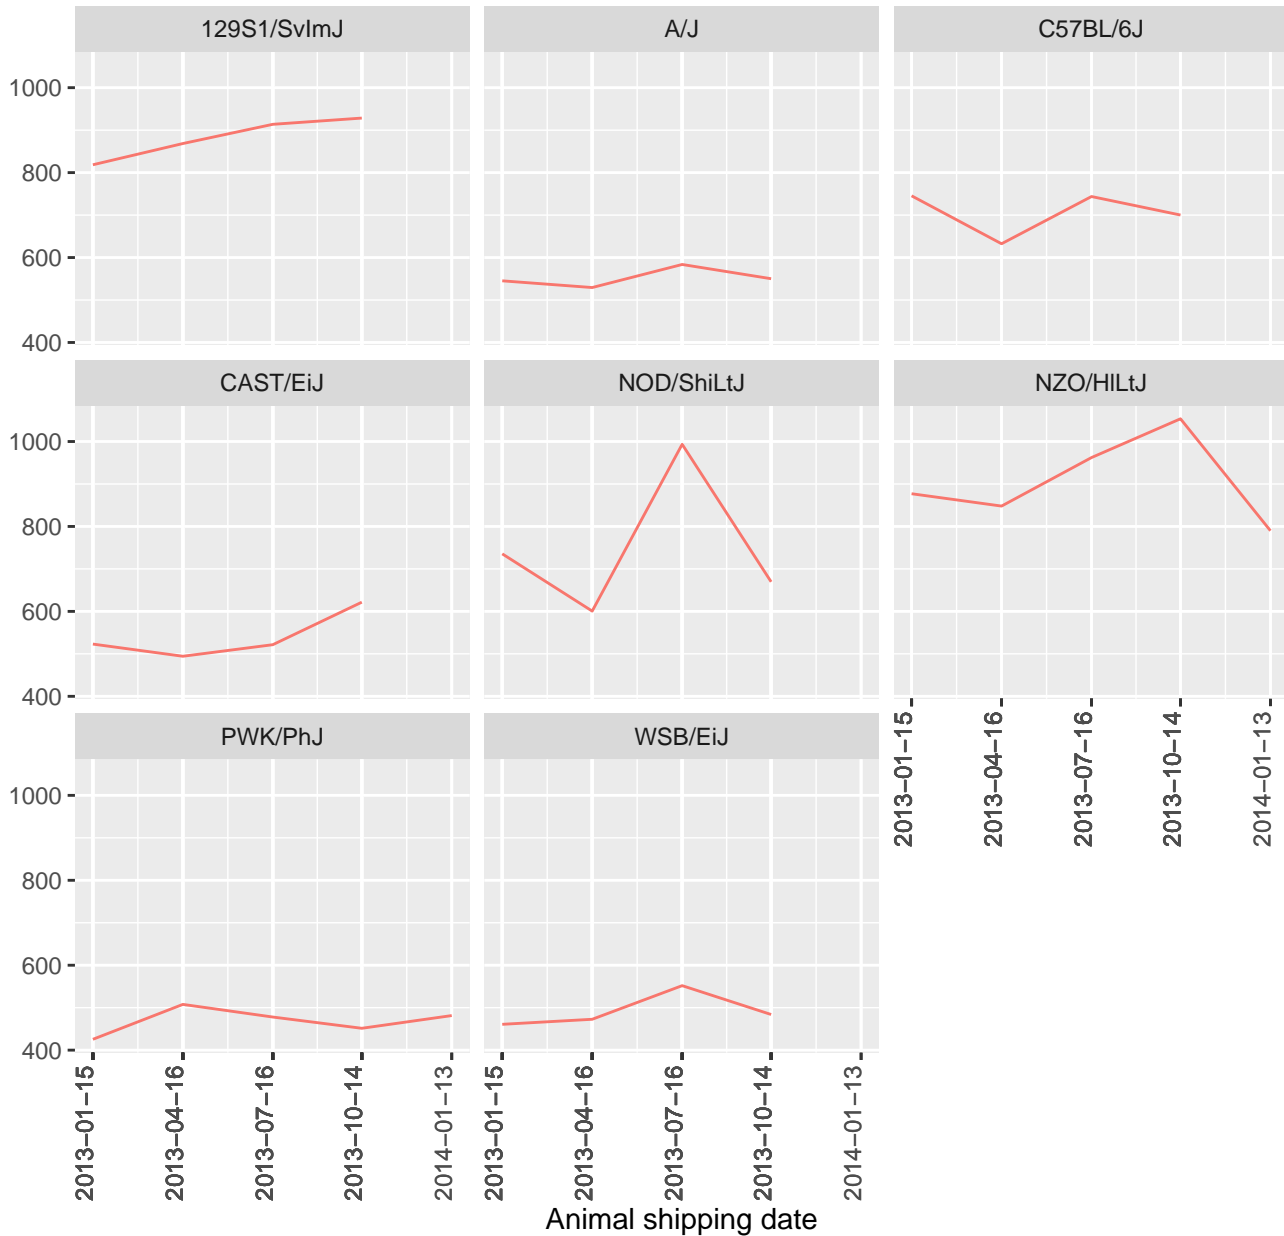

Procedure: GMC16  
Parameter: AST\_17

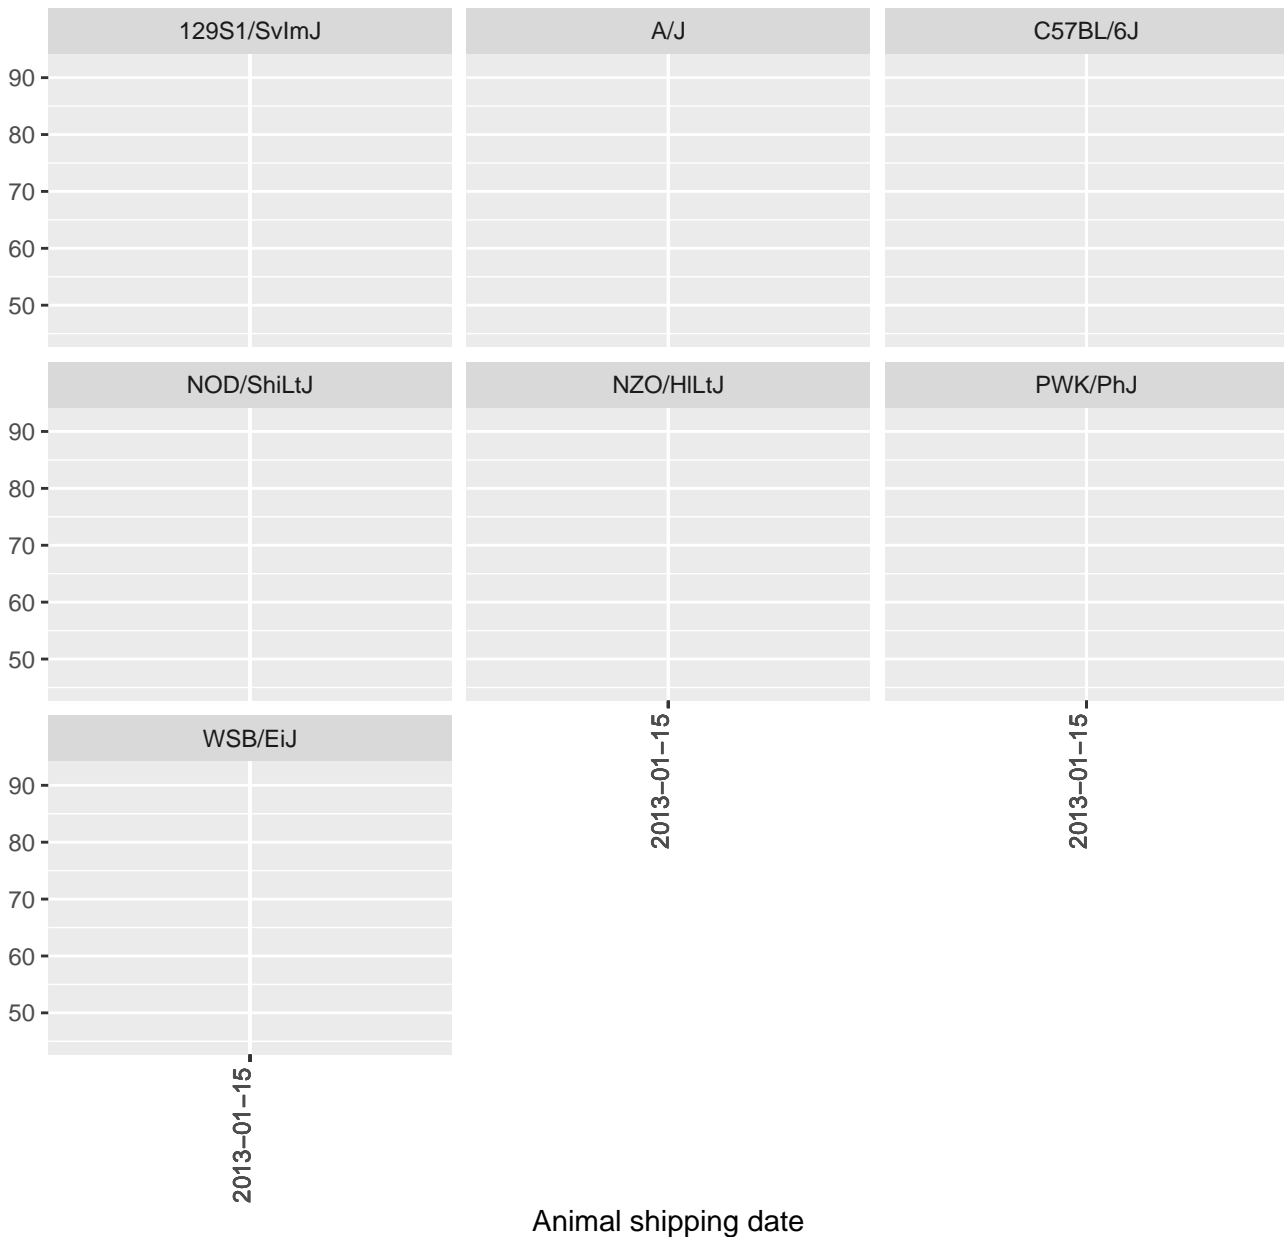



Procedure: GMC16  
Parameter: AST\_21

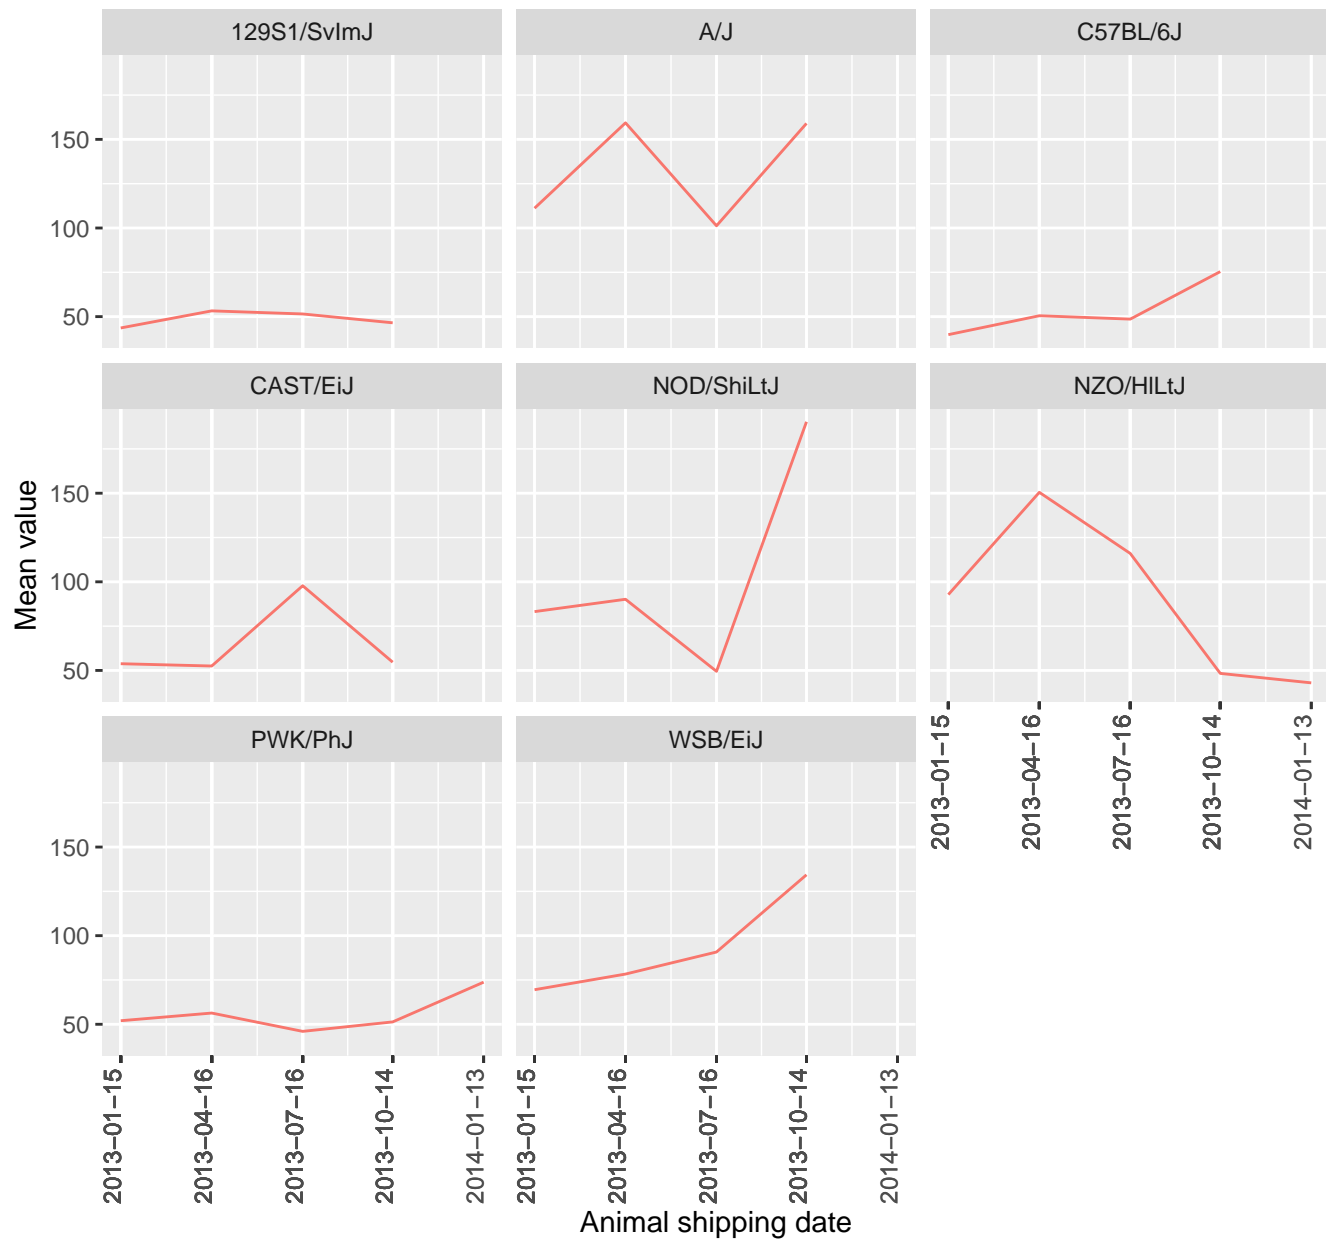

Procedure: GMC16

Parameter: bw\_17

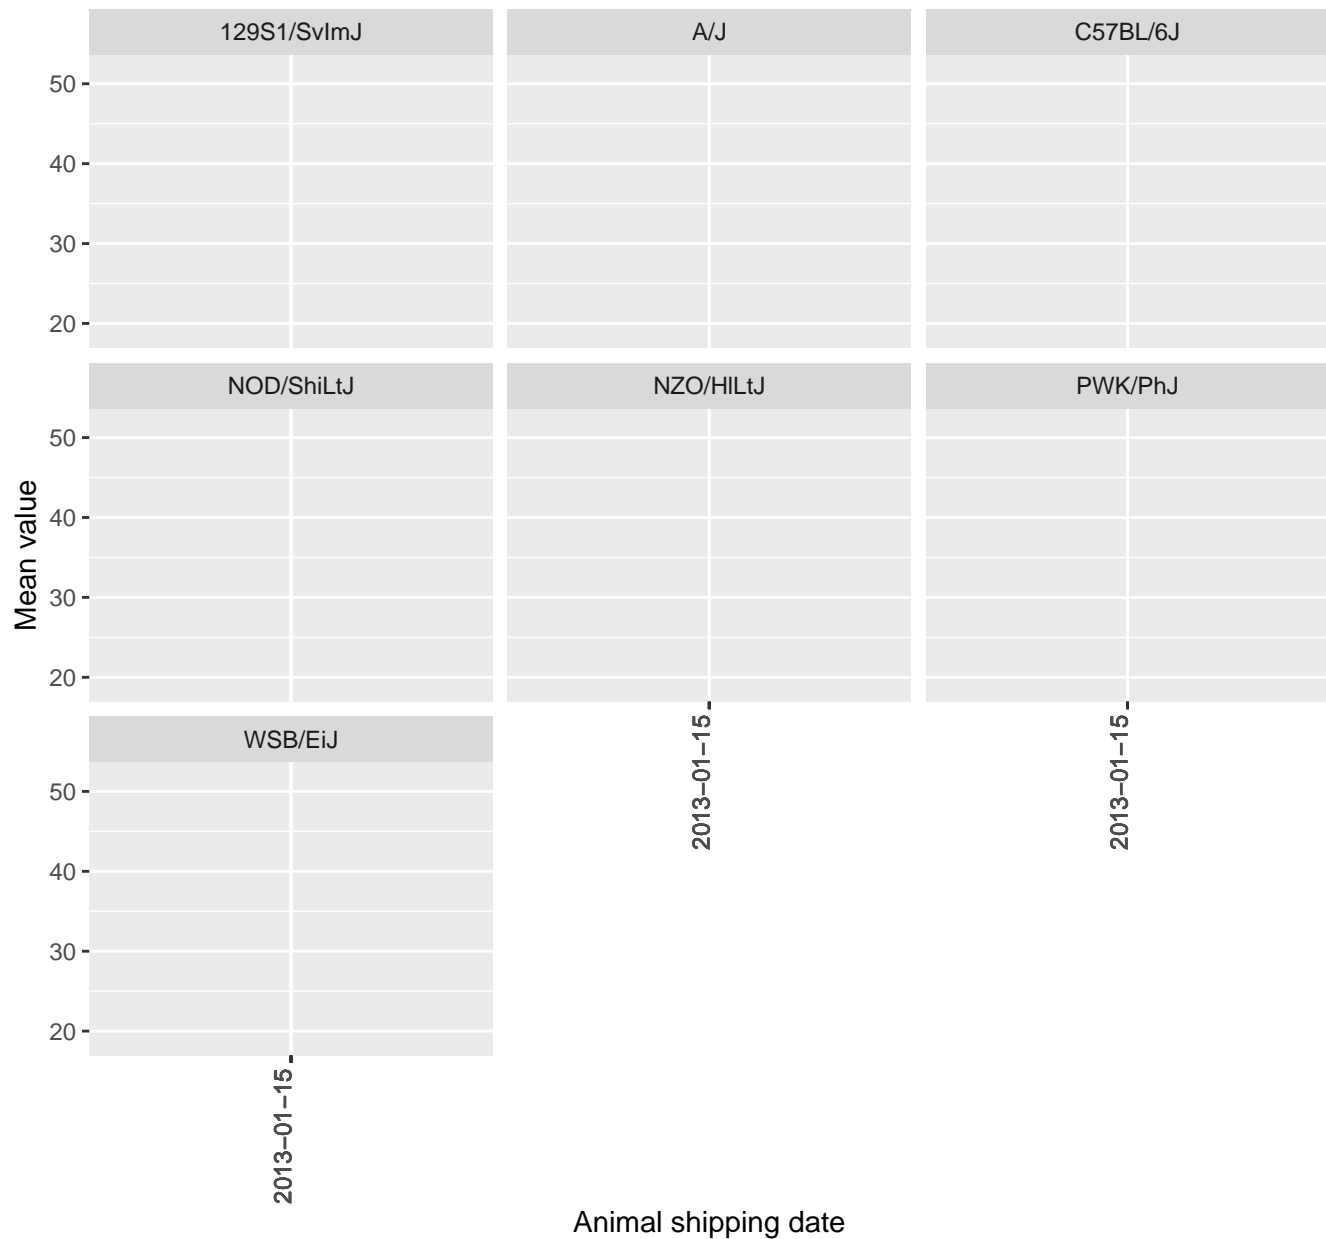

Procedure: GMC16

Parameter: bw\_21

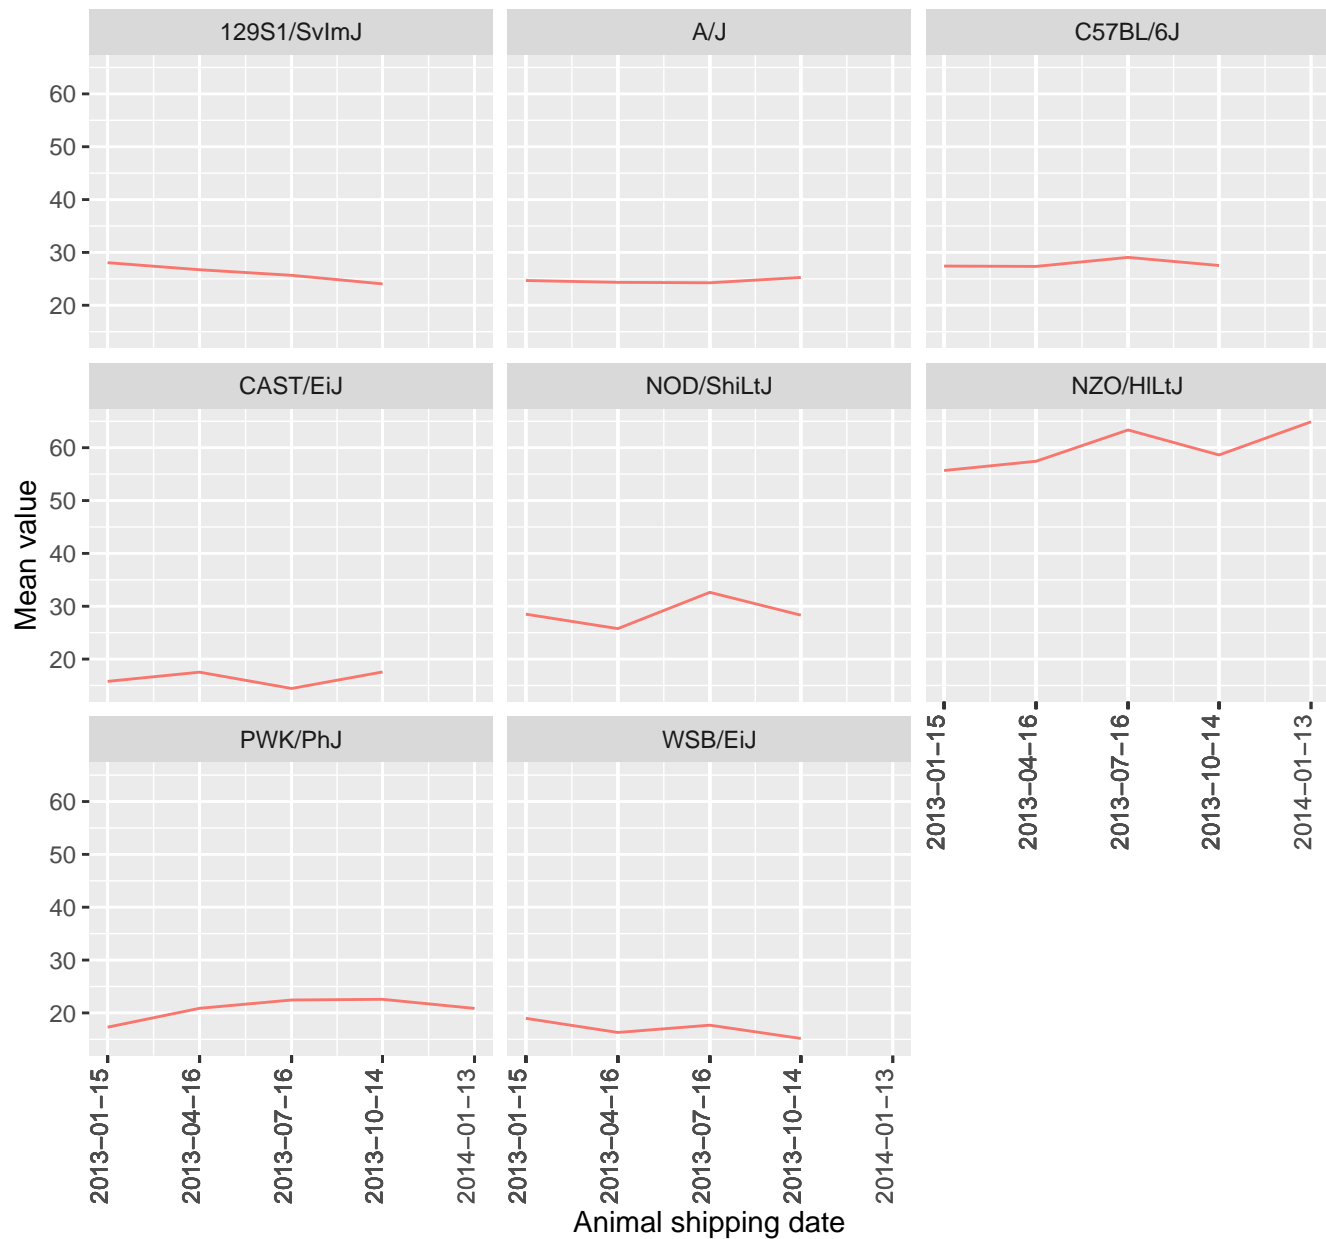

Procedure: GMC16  
Parameter: calcium\_17

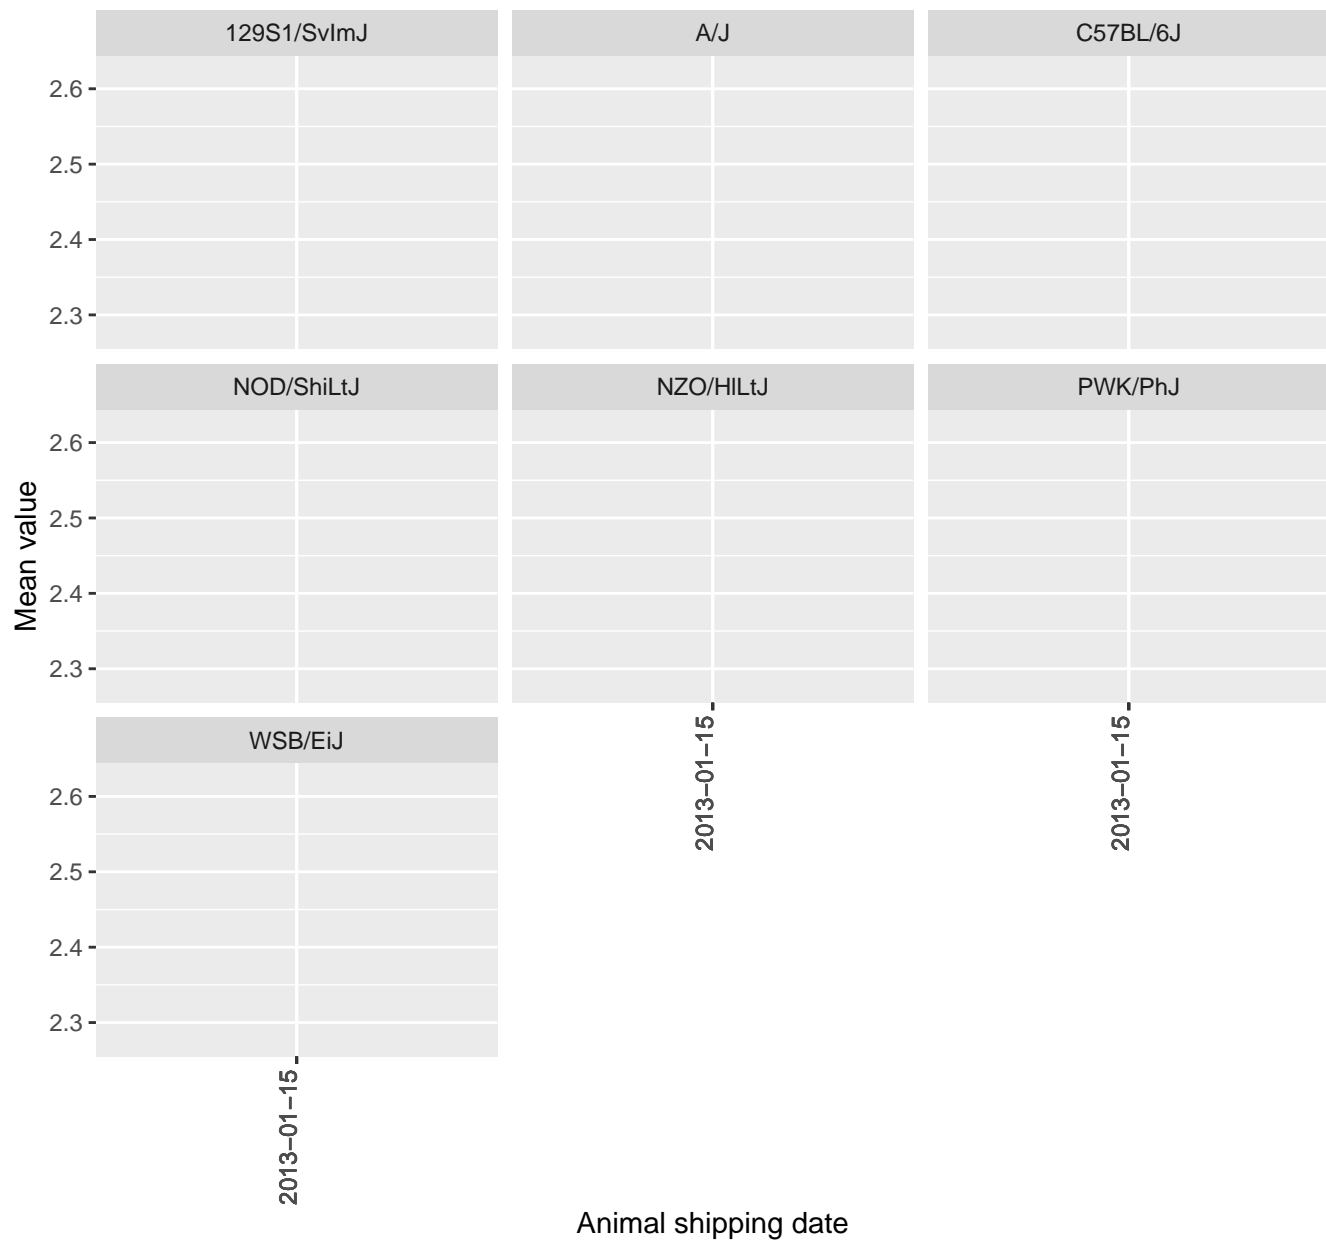

Procedure: GMC16  
Parameter: calcium\_21

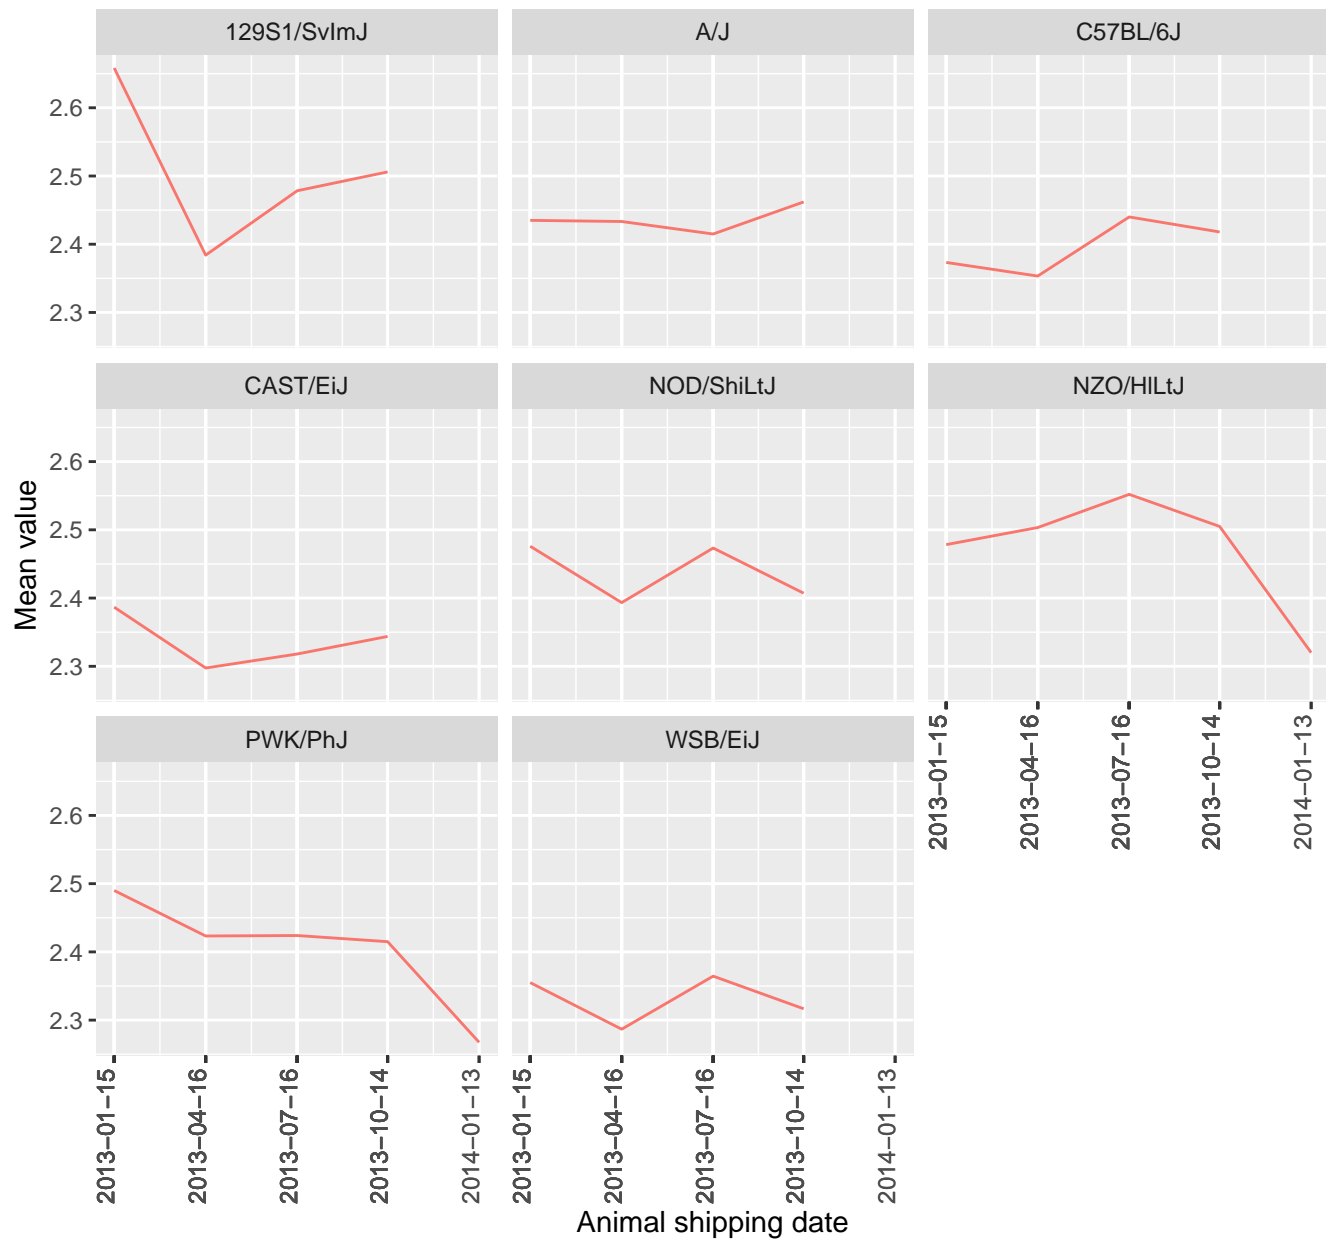

Procedure: GMC16  
Parameter: chloride\_17

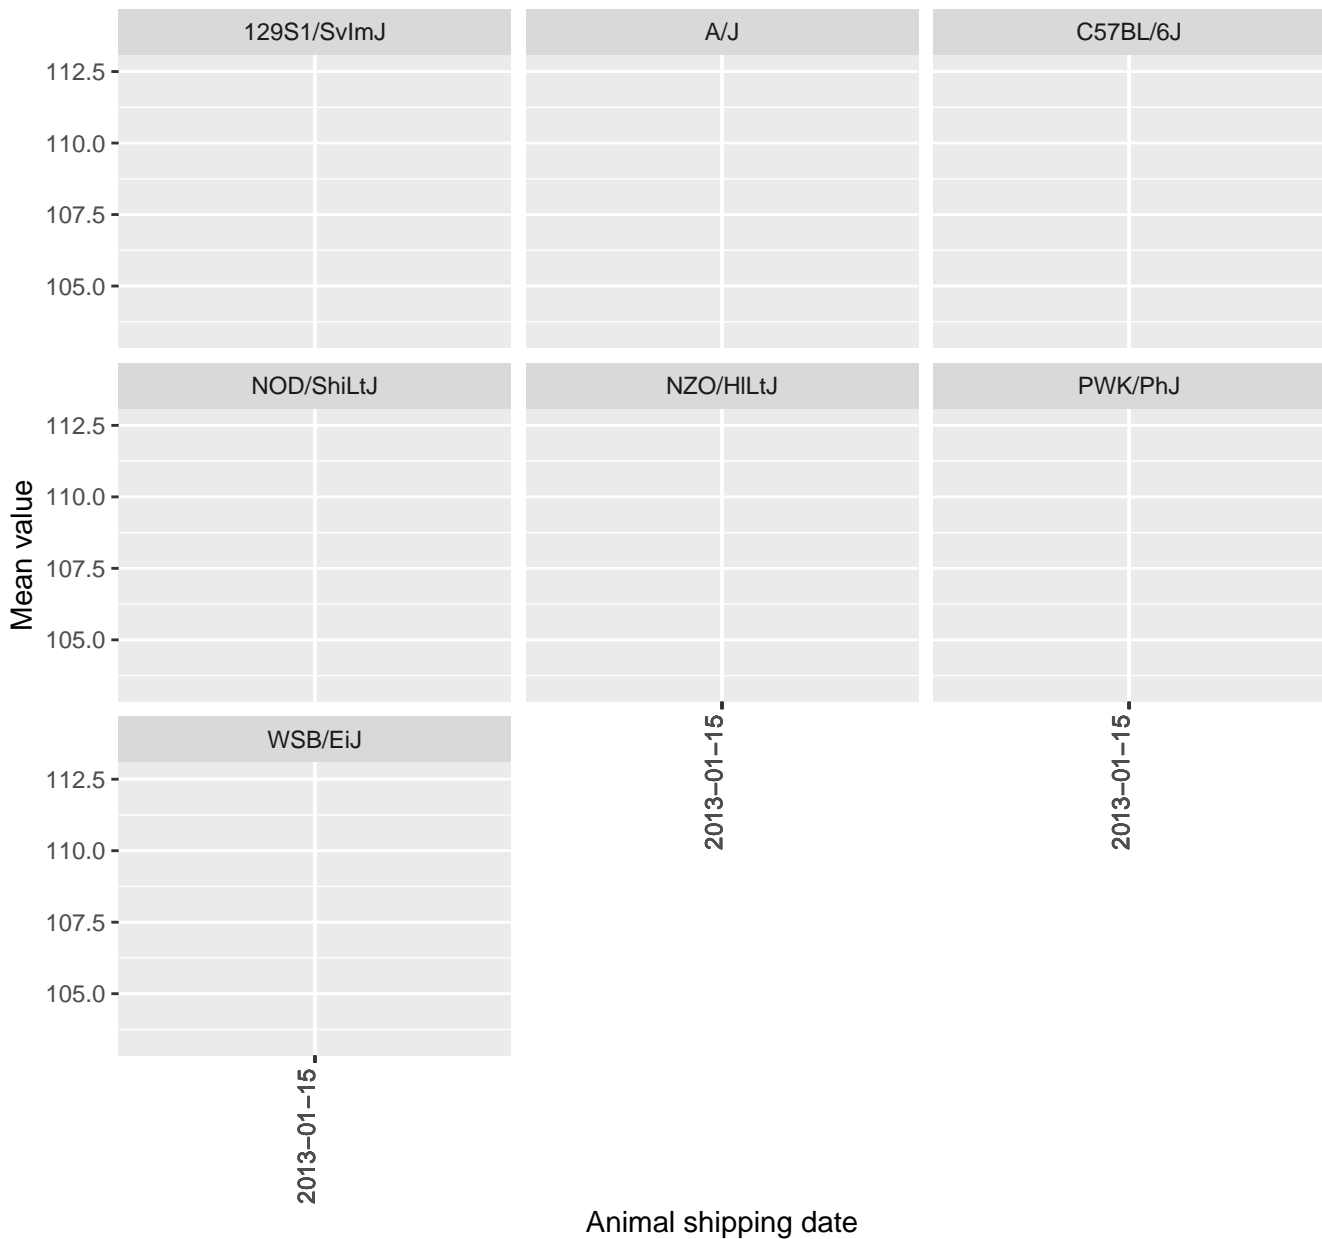

Procedure: GMC16  
Parameter: chloride\_21

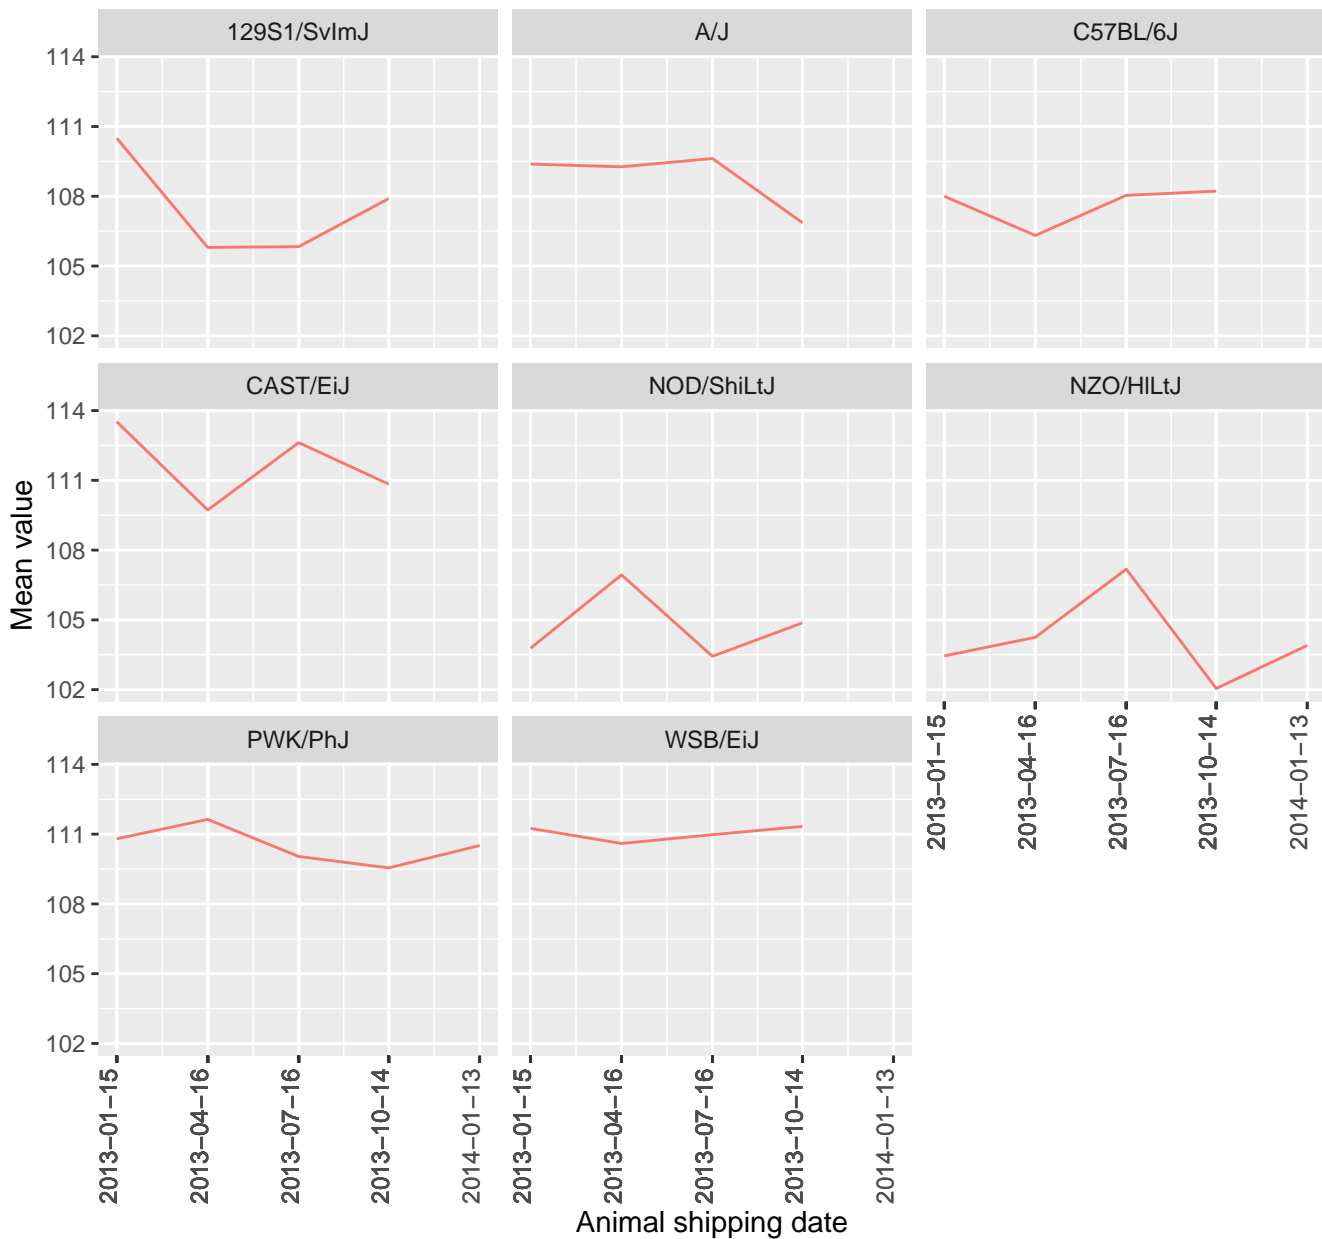

Procedure: GMC16  
Parameter: CHOL\_17

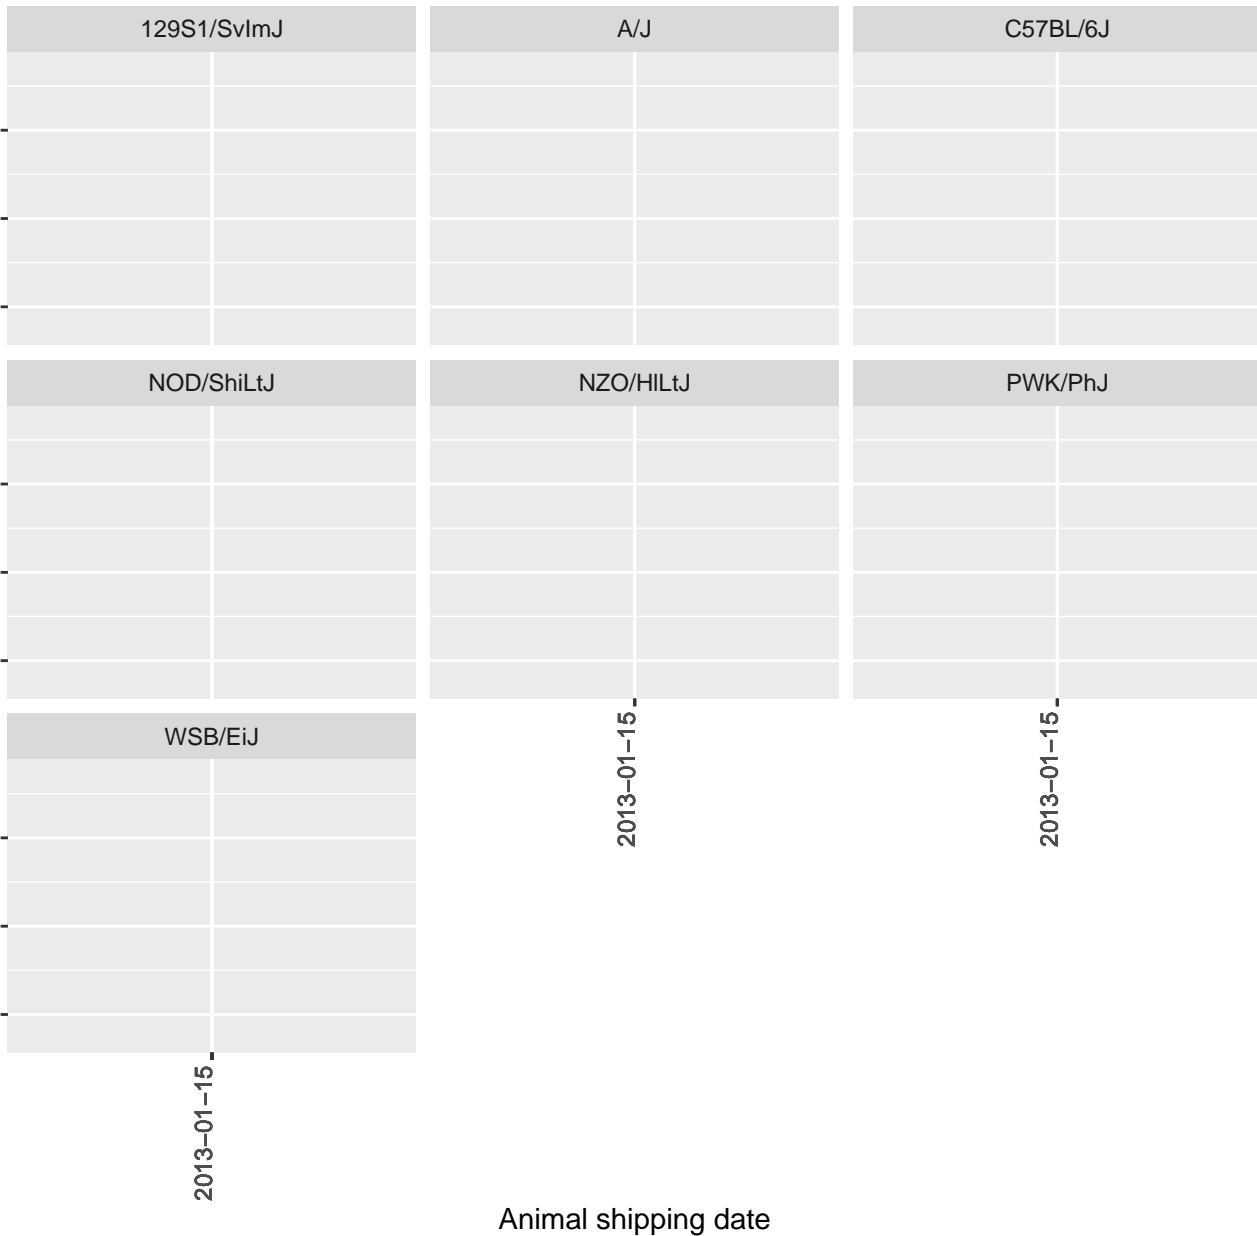



Procedure: GMC16  
Parameter: CHOL\_21

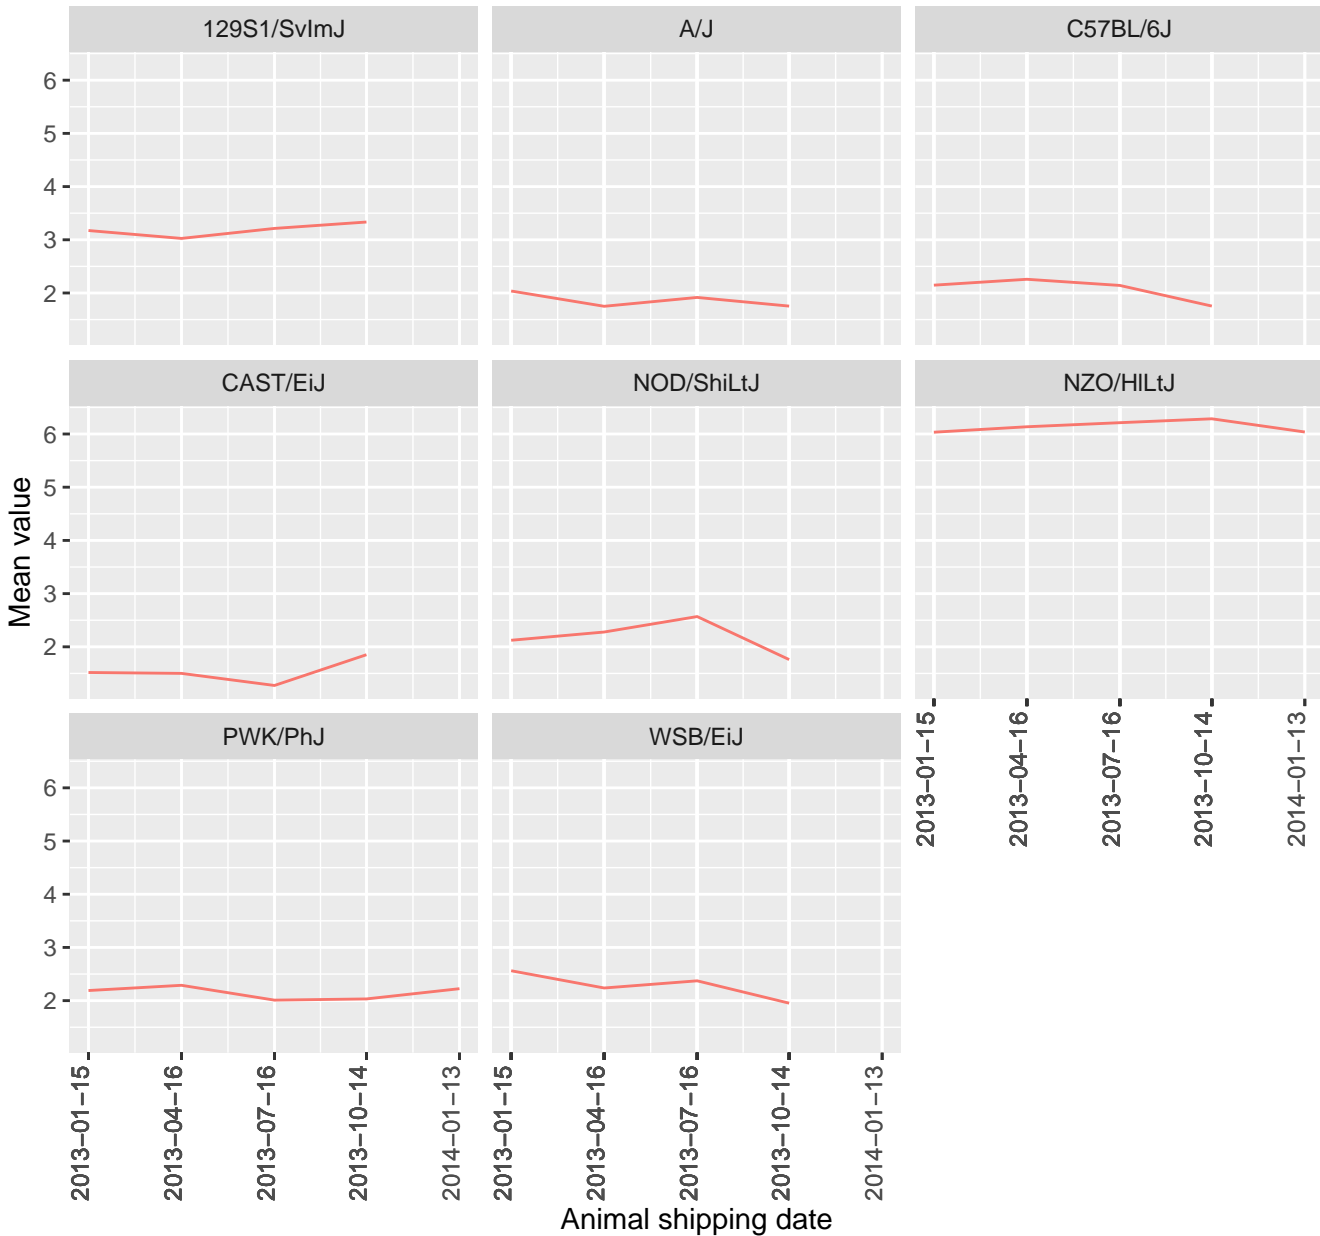

Procedure: GMC16  
Parameter: creatinine\_17

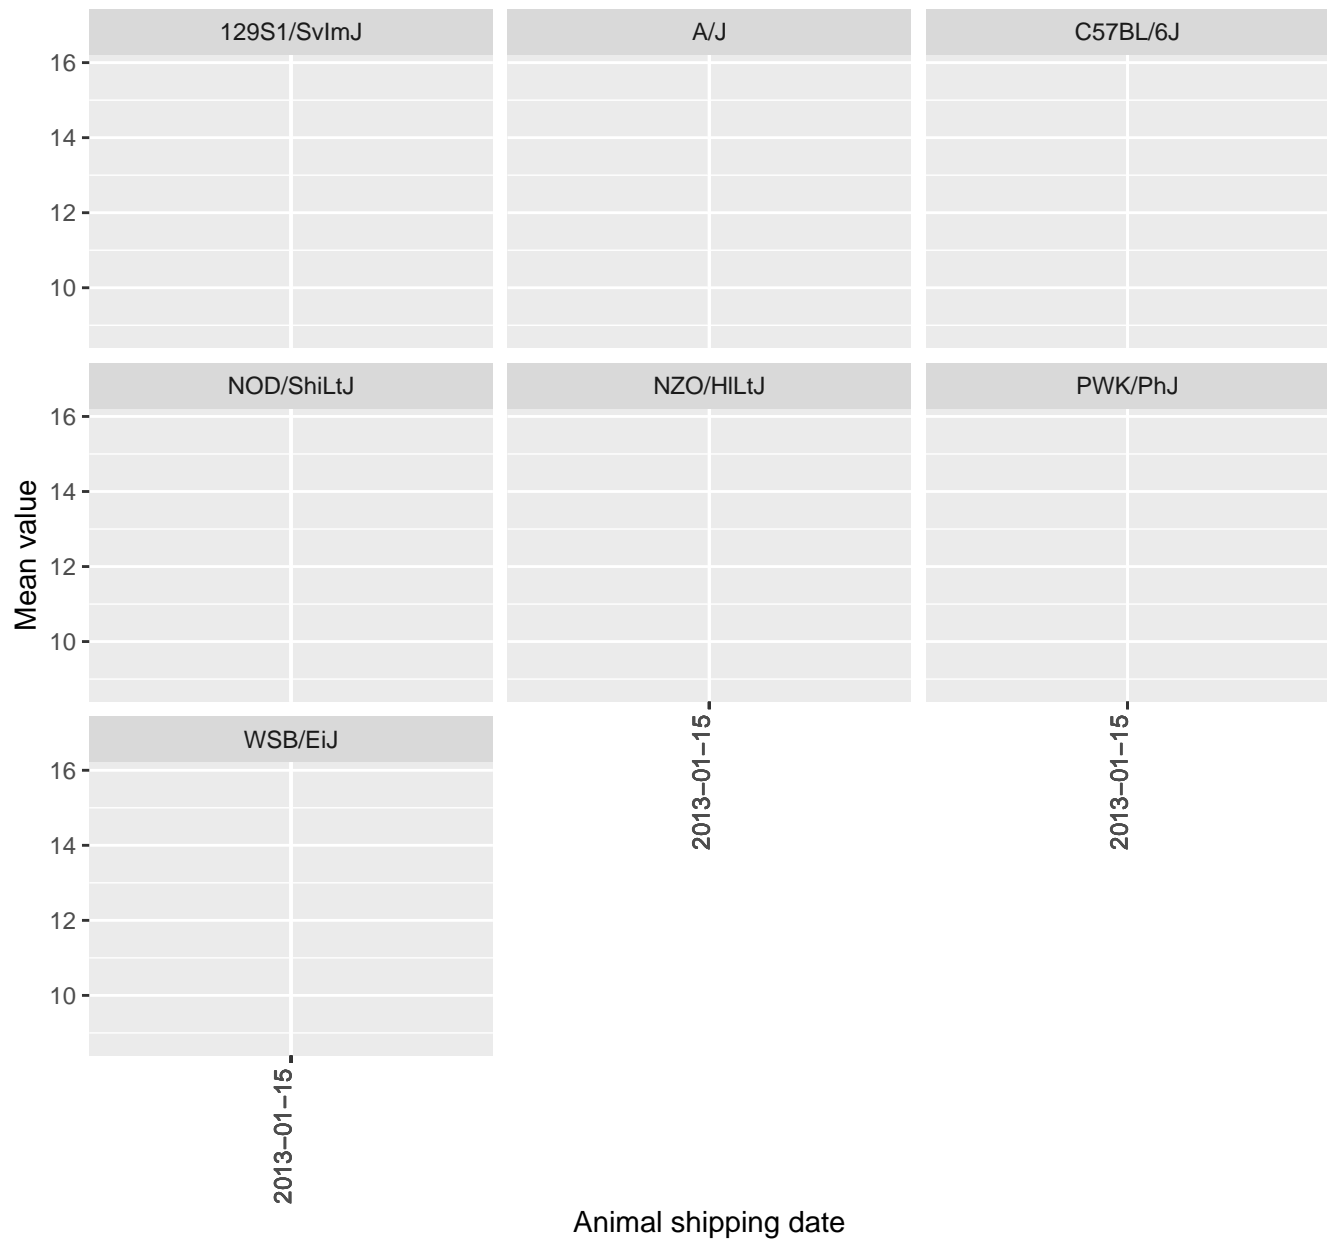

Procedure: GMC16  
Parameter: creatinine\_21

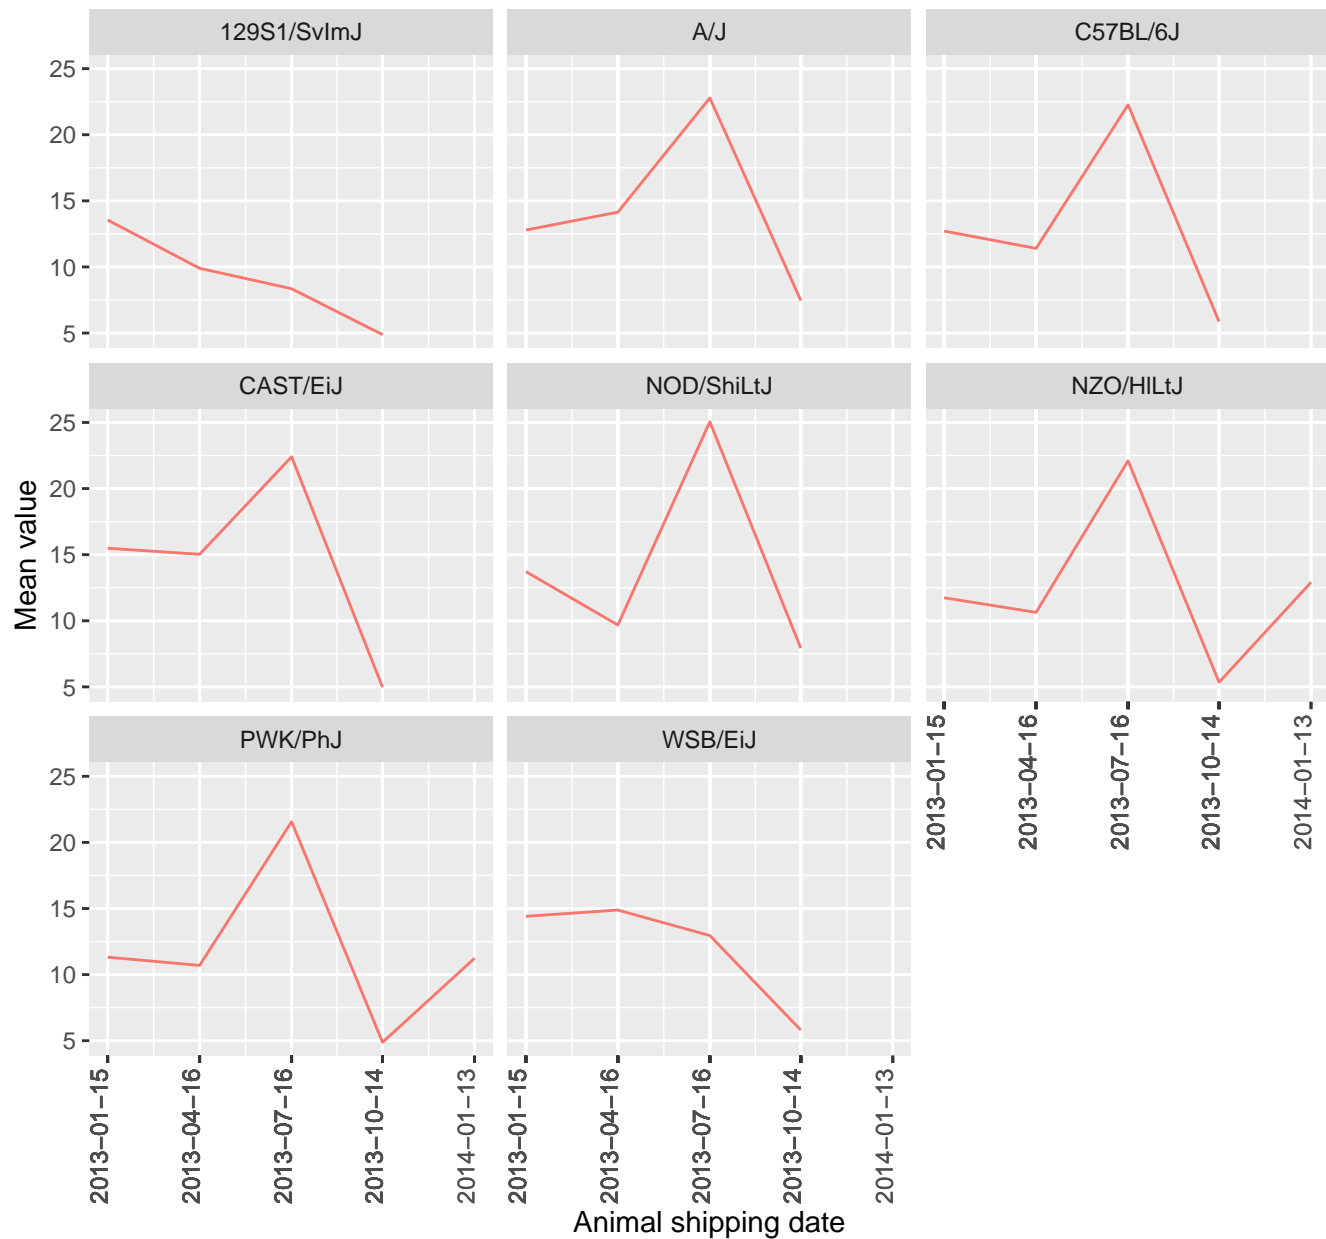

Procedure: GMC16  
Parameter: GLU\_17

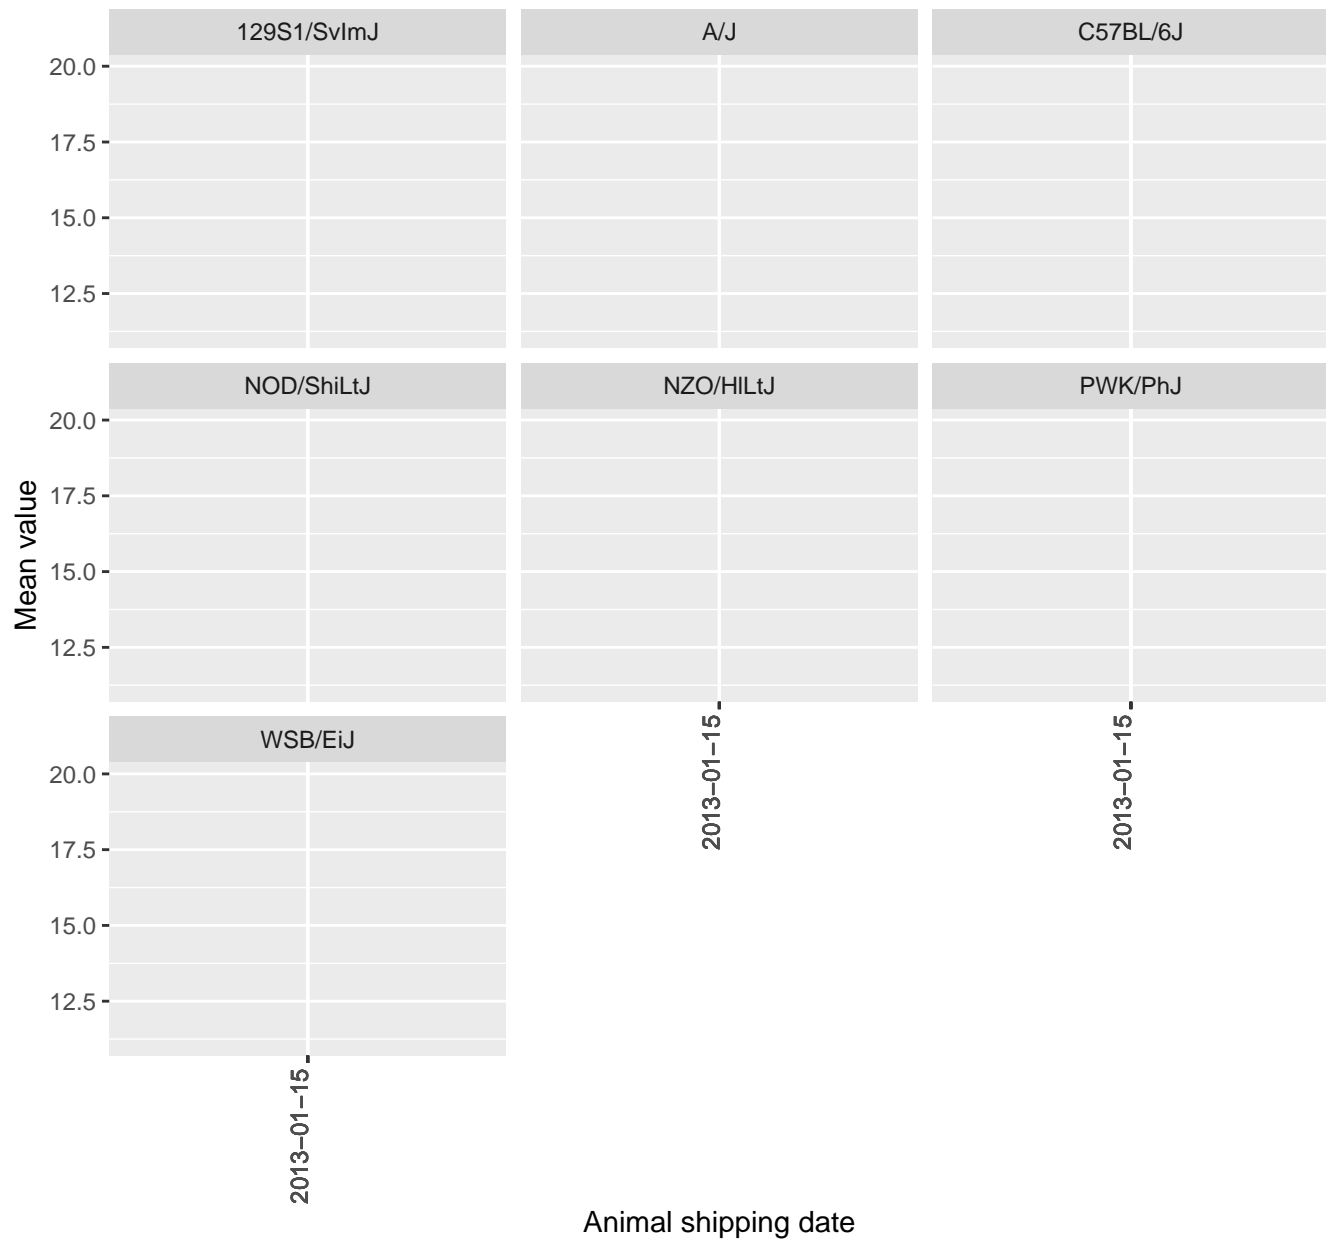

Procedure: GMC16  
Parameter: GLU\_21

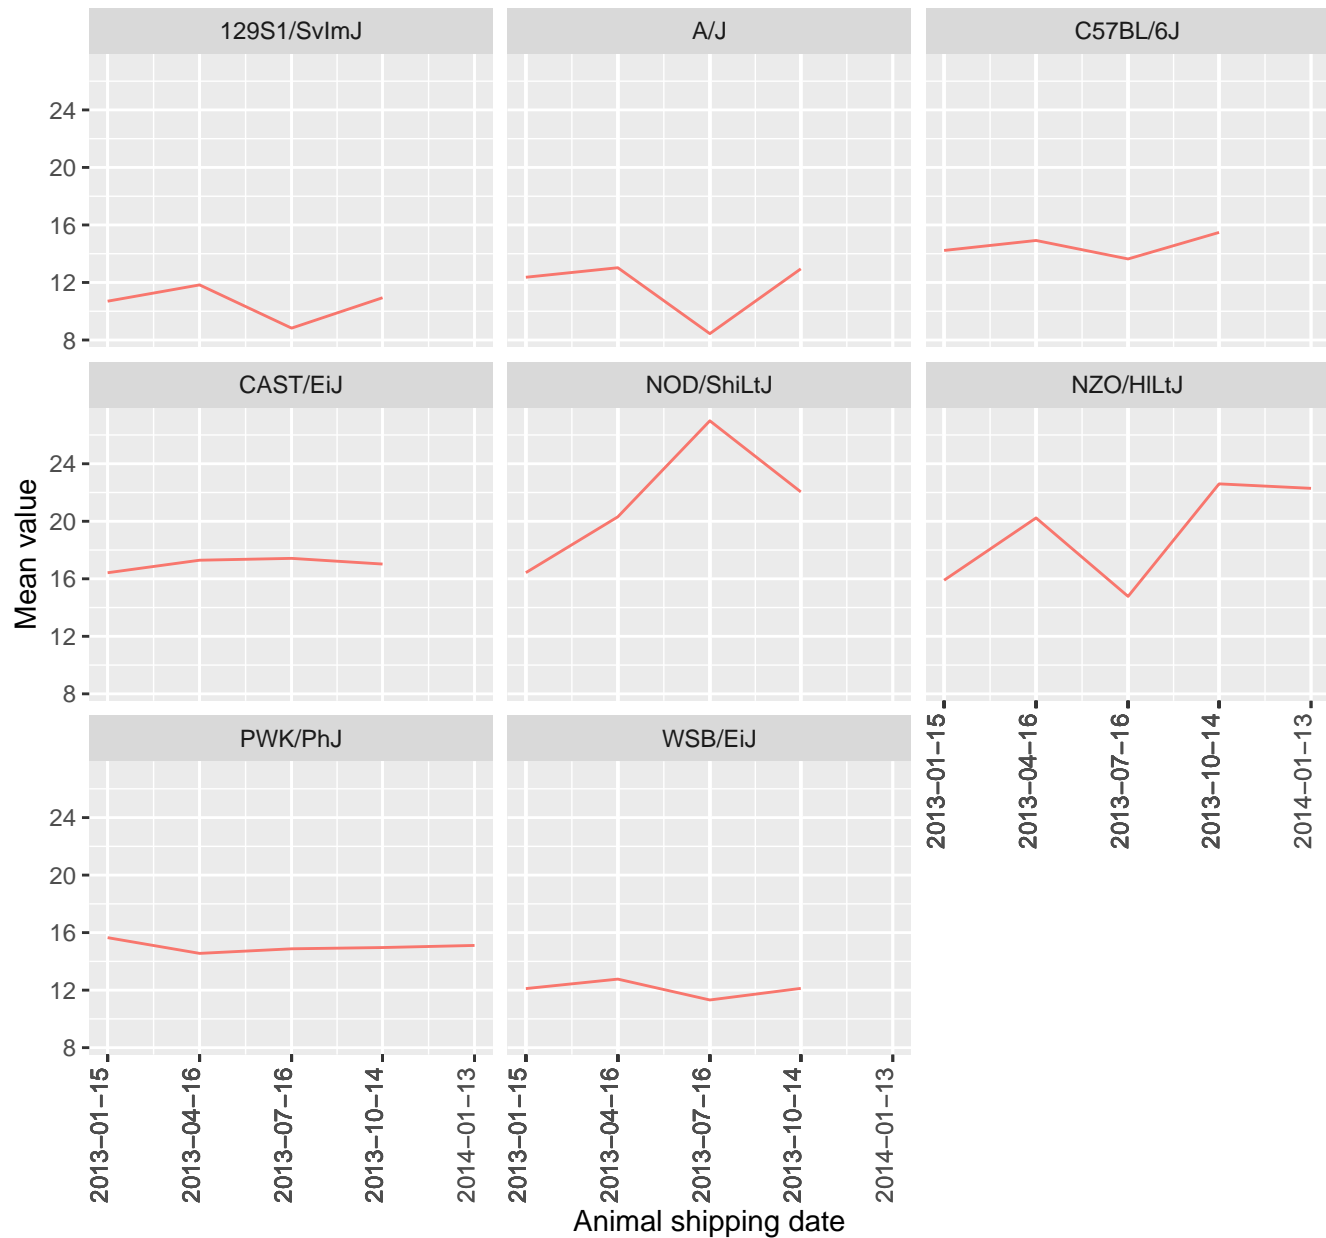

Procedure: GMC16

Parameter: iron\_17

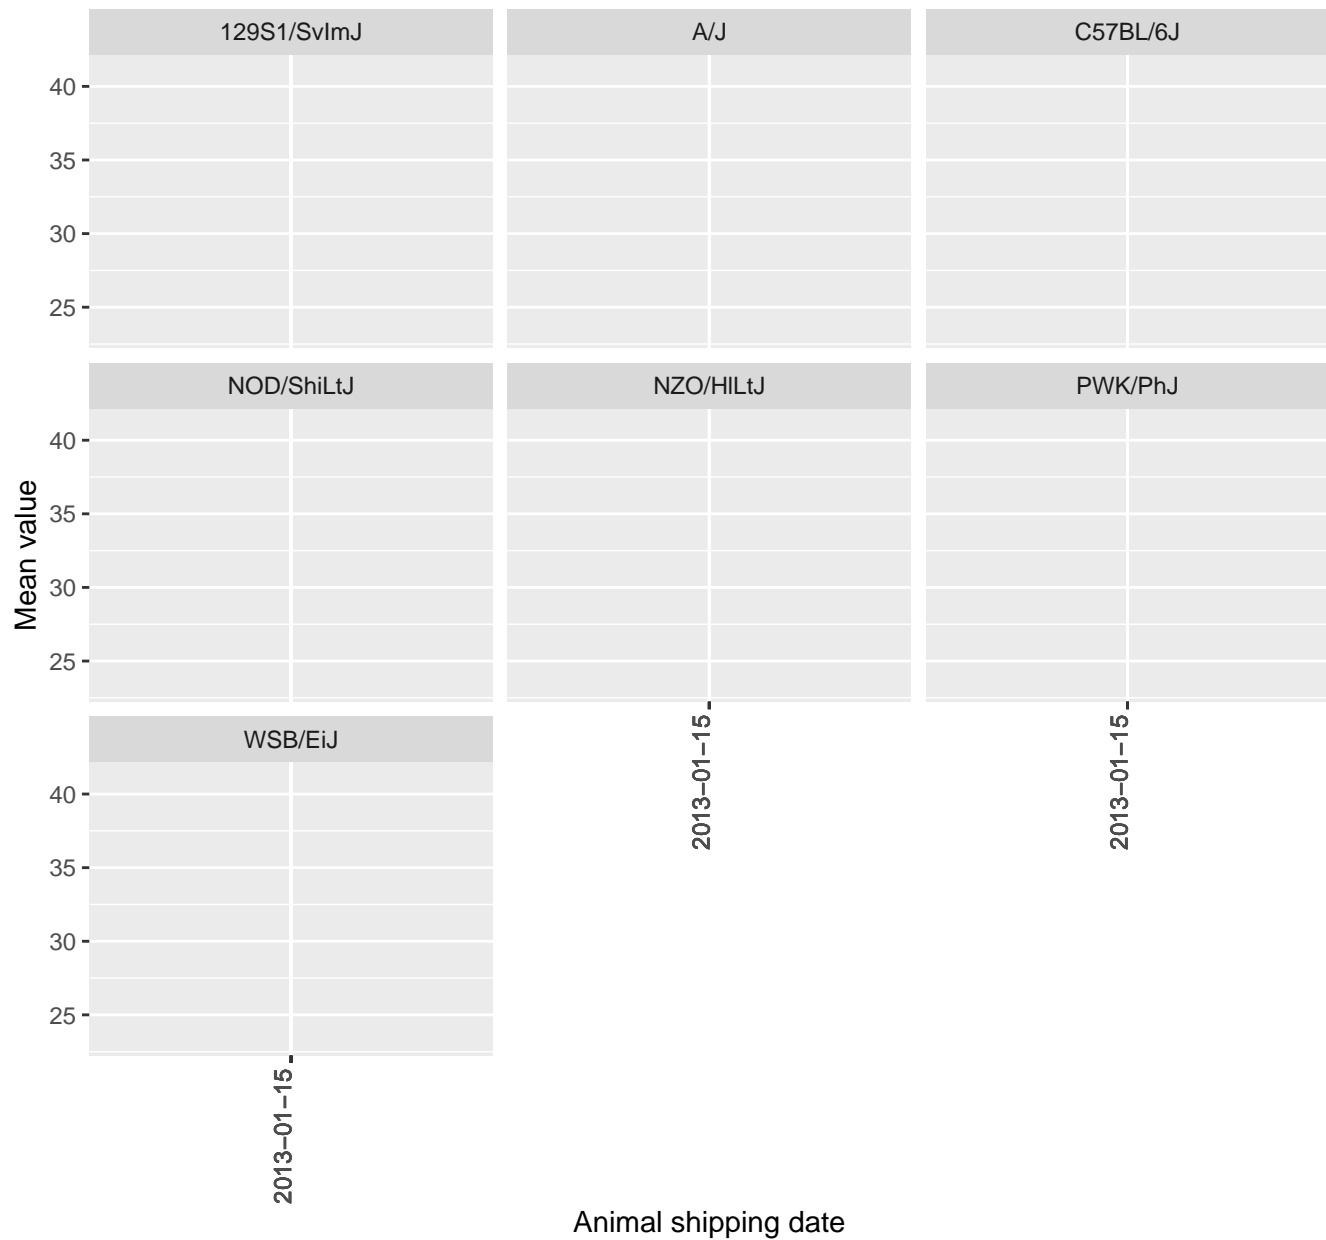

Procedure: GMC16  
Parameter: iron\_21

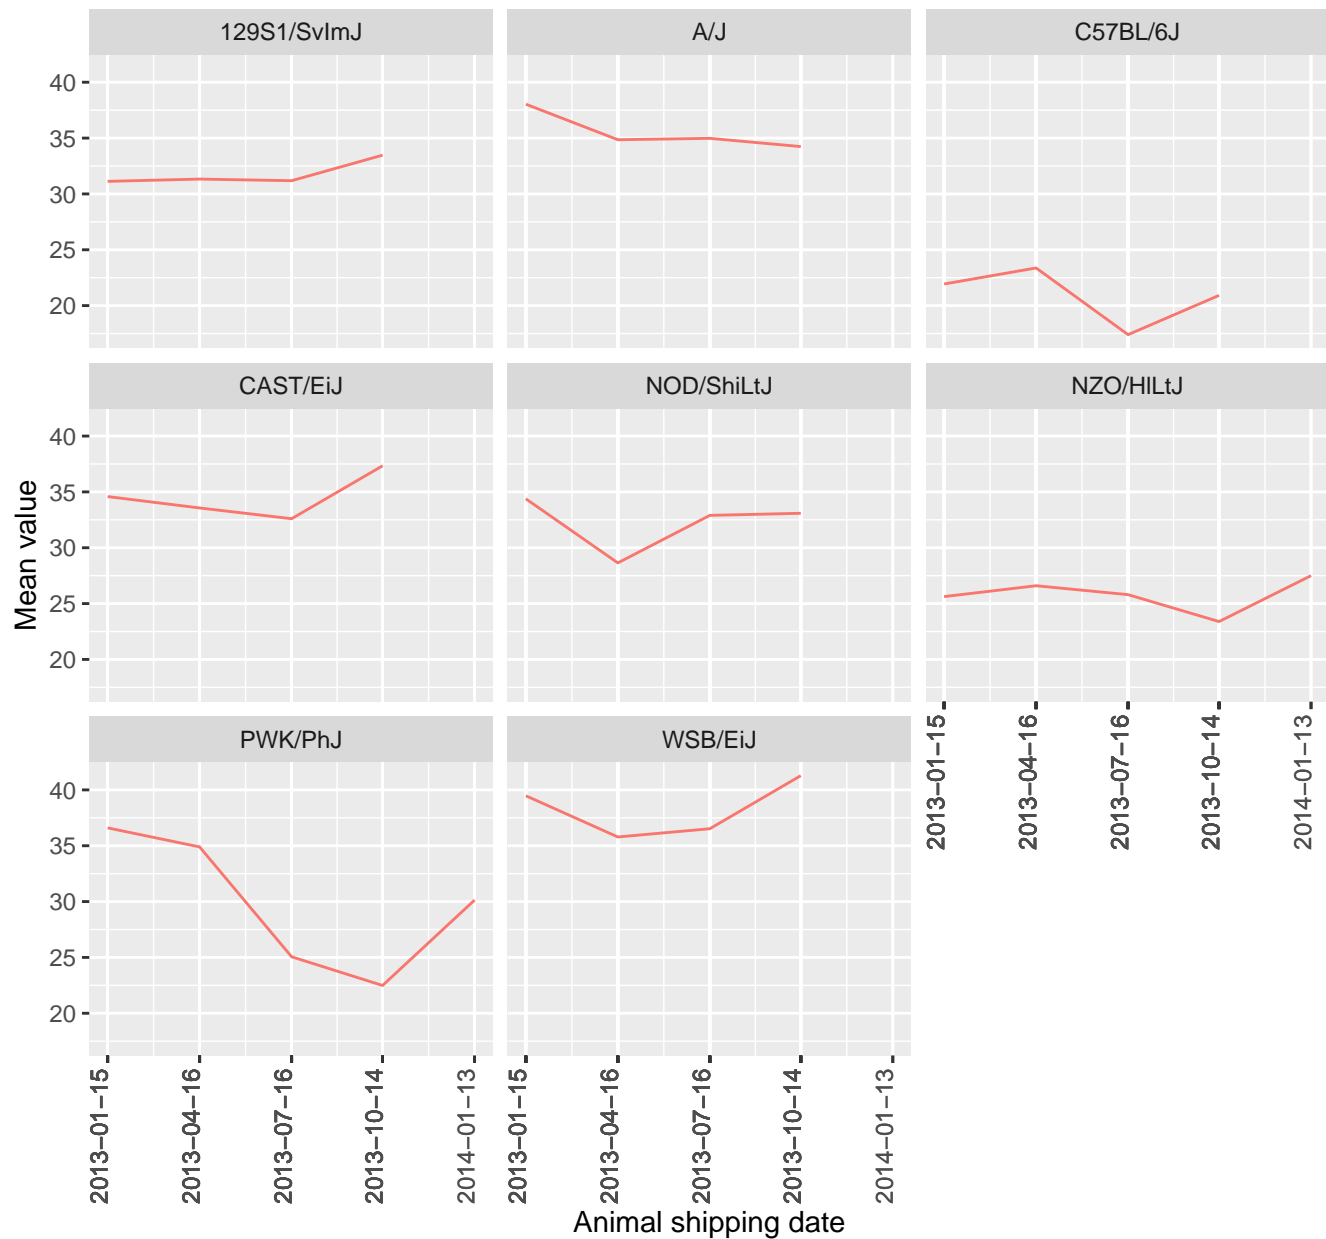

Procedure: GMC16  
Parameter: iron\_binding\_21

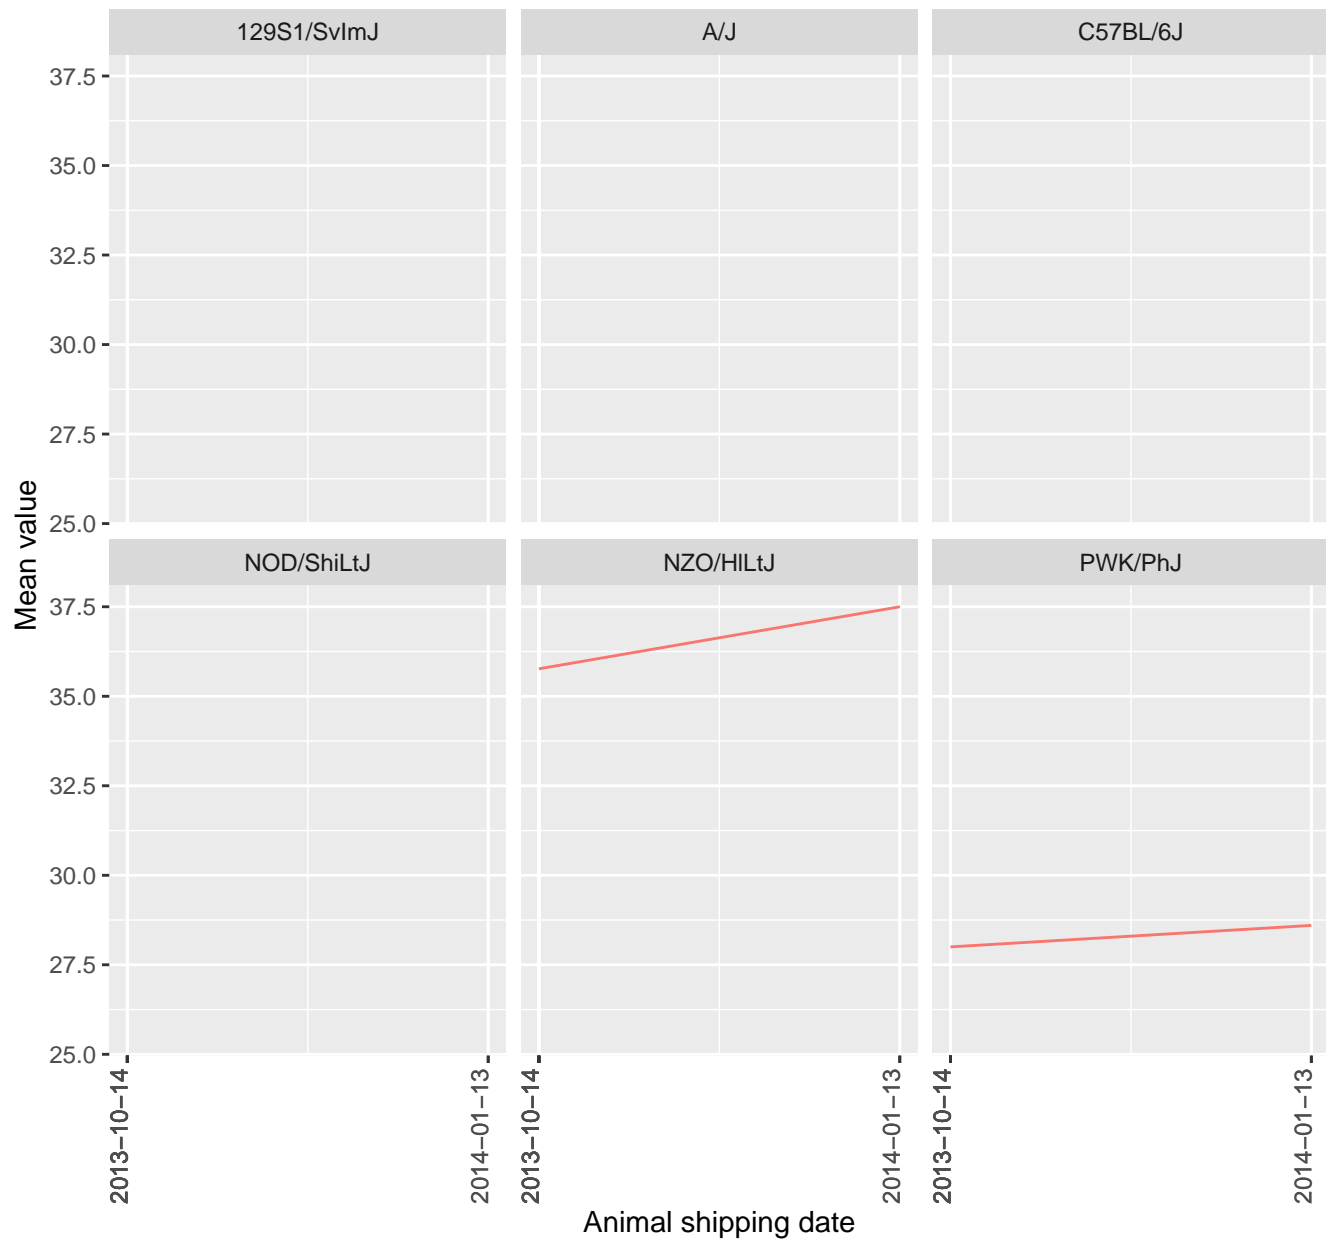



Procedure: GMC16  
Parameter: lactate\_17

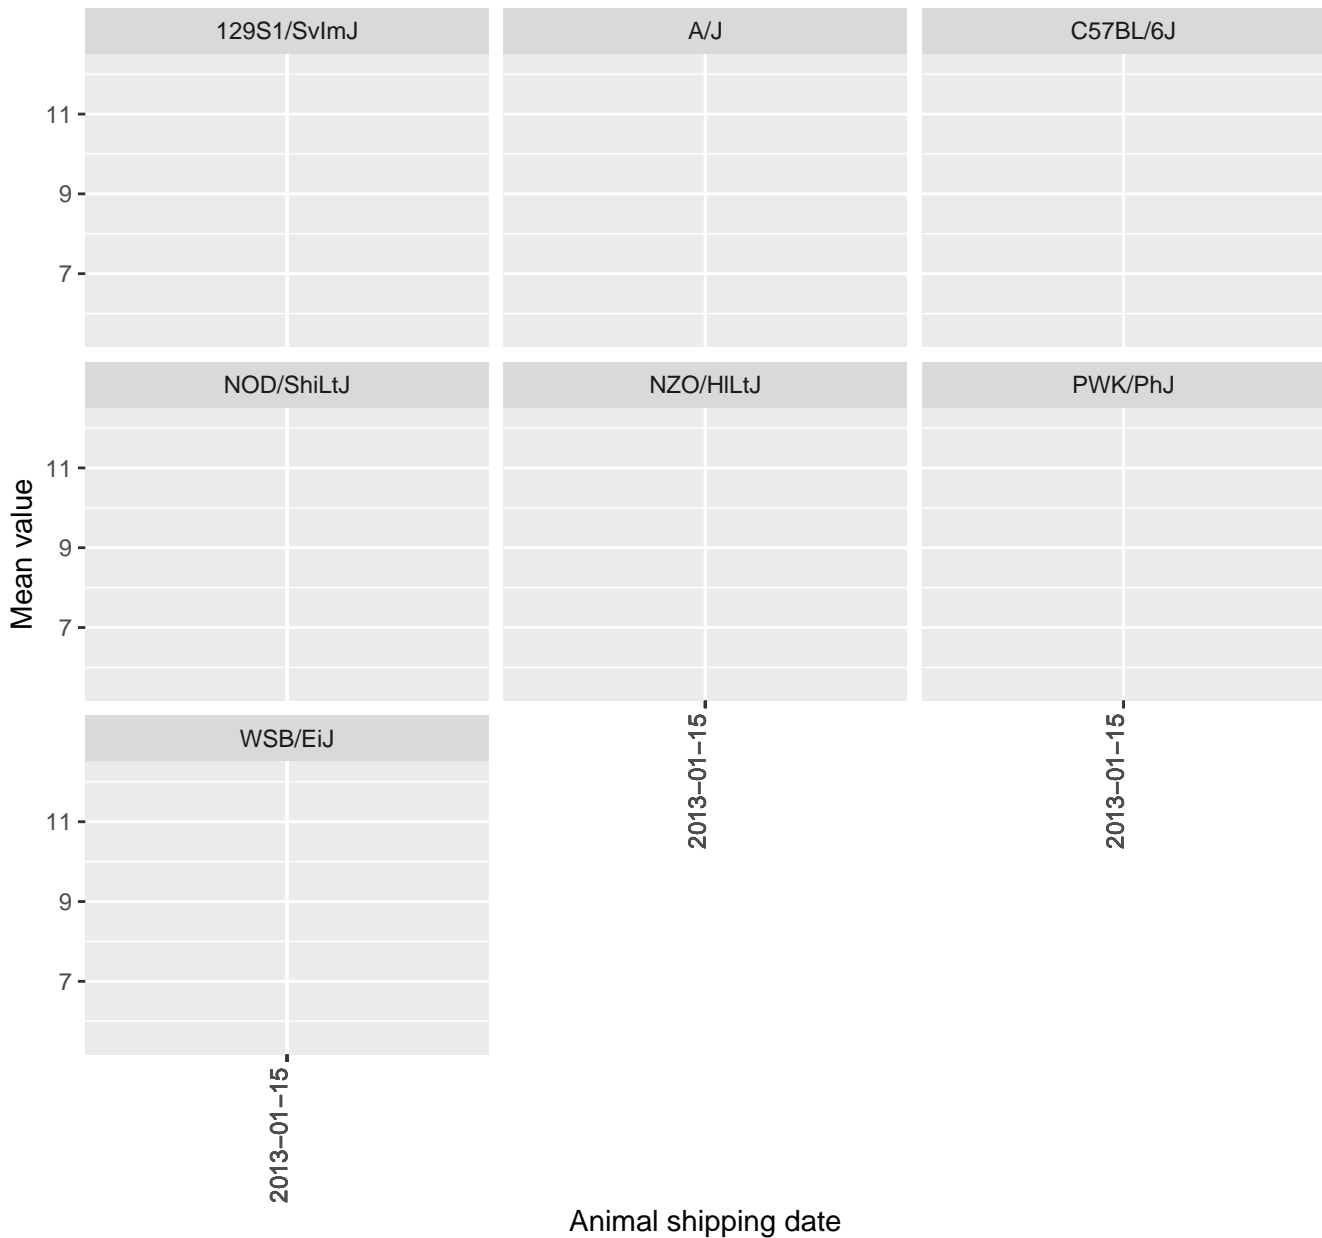

Procedure: GMC16  
Parameter: lactate\_21

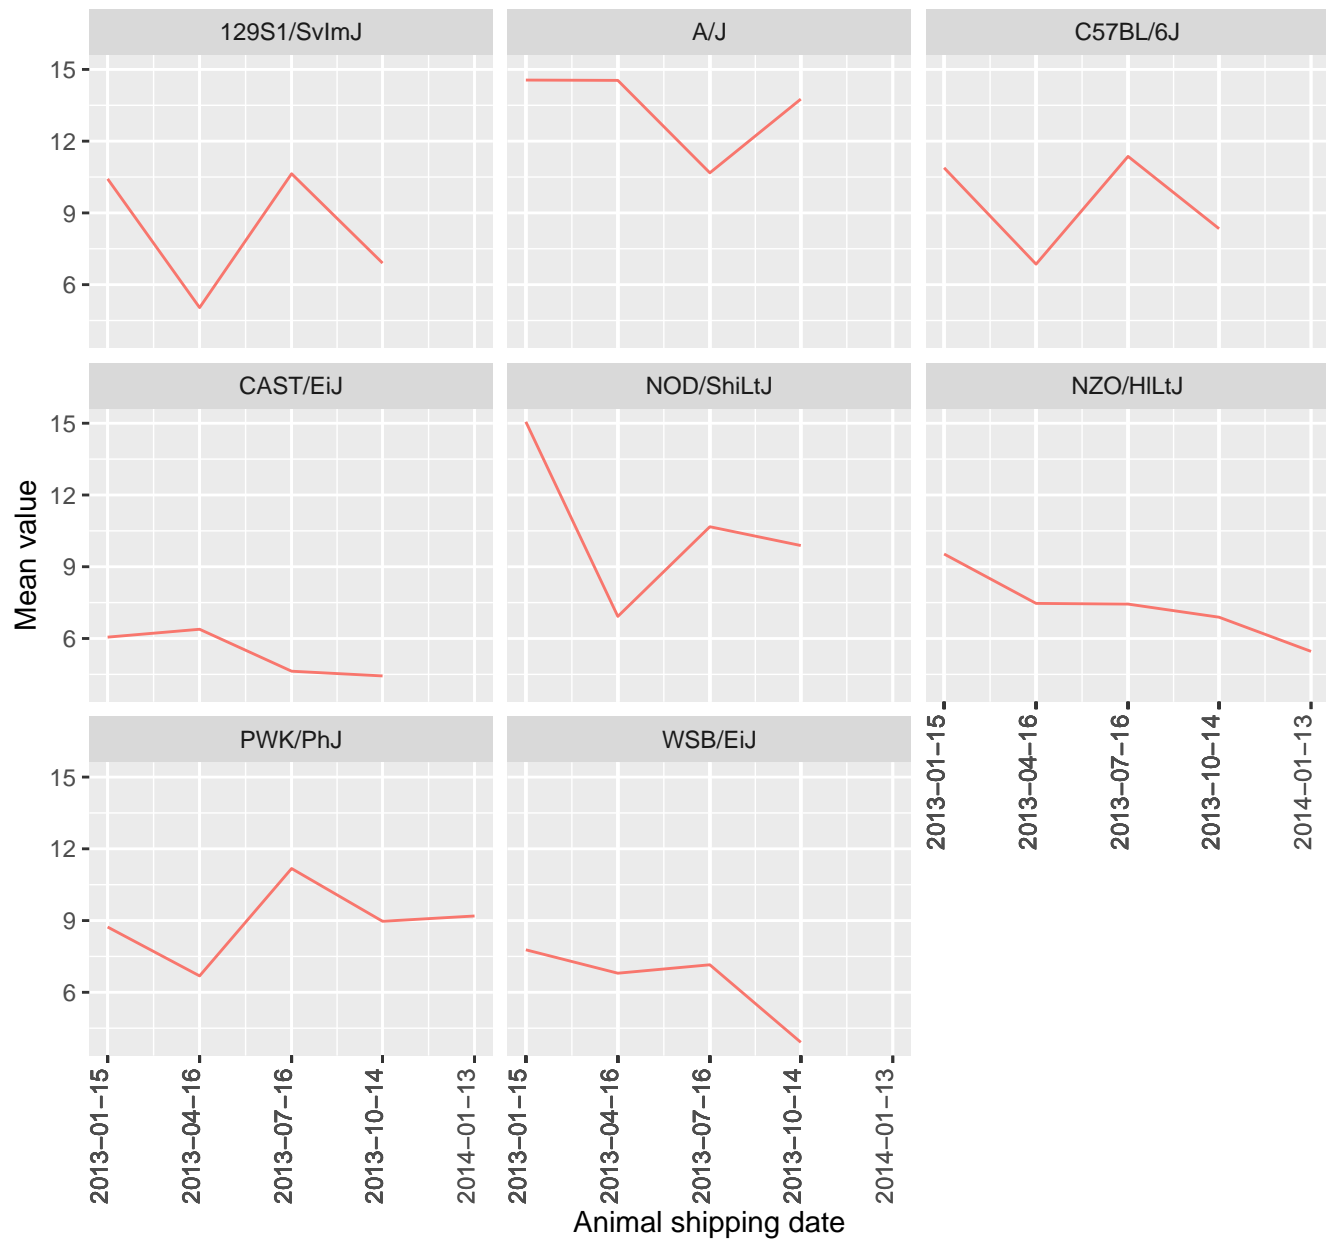

Procedure: GMC16  
Parameter: LDH\_17

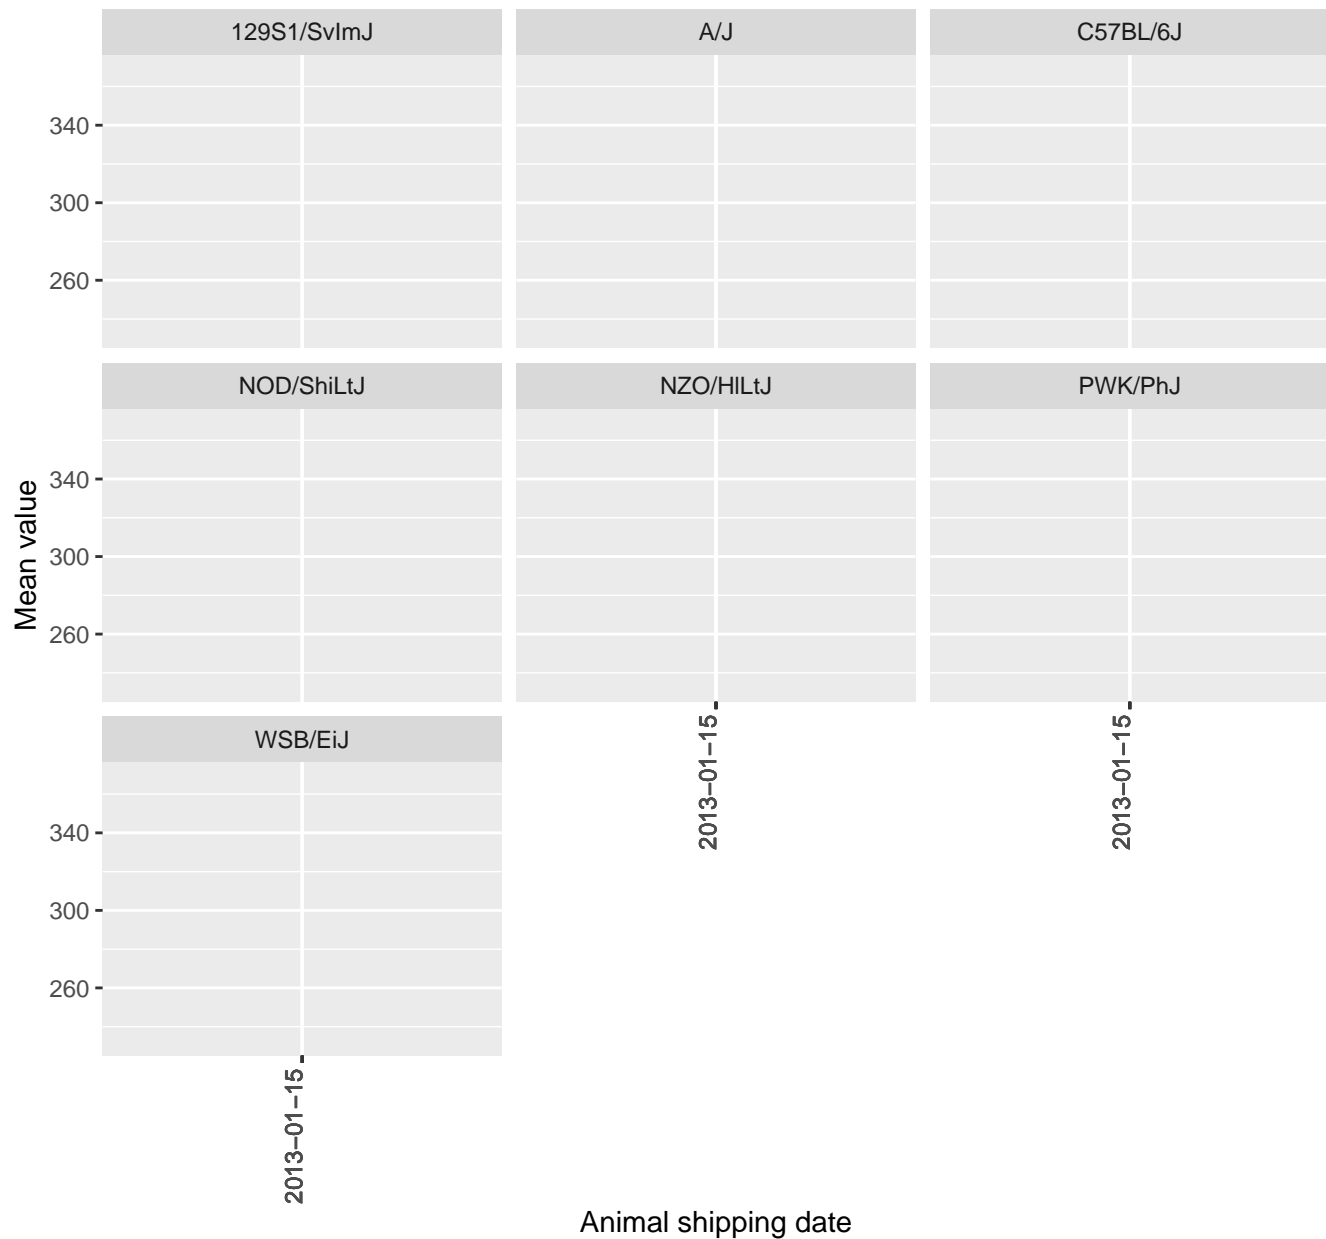

Procedure: GMC16  
Parameter: LDH\_21

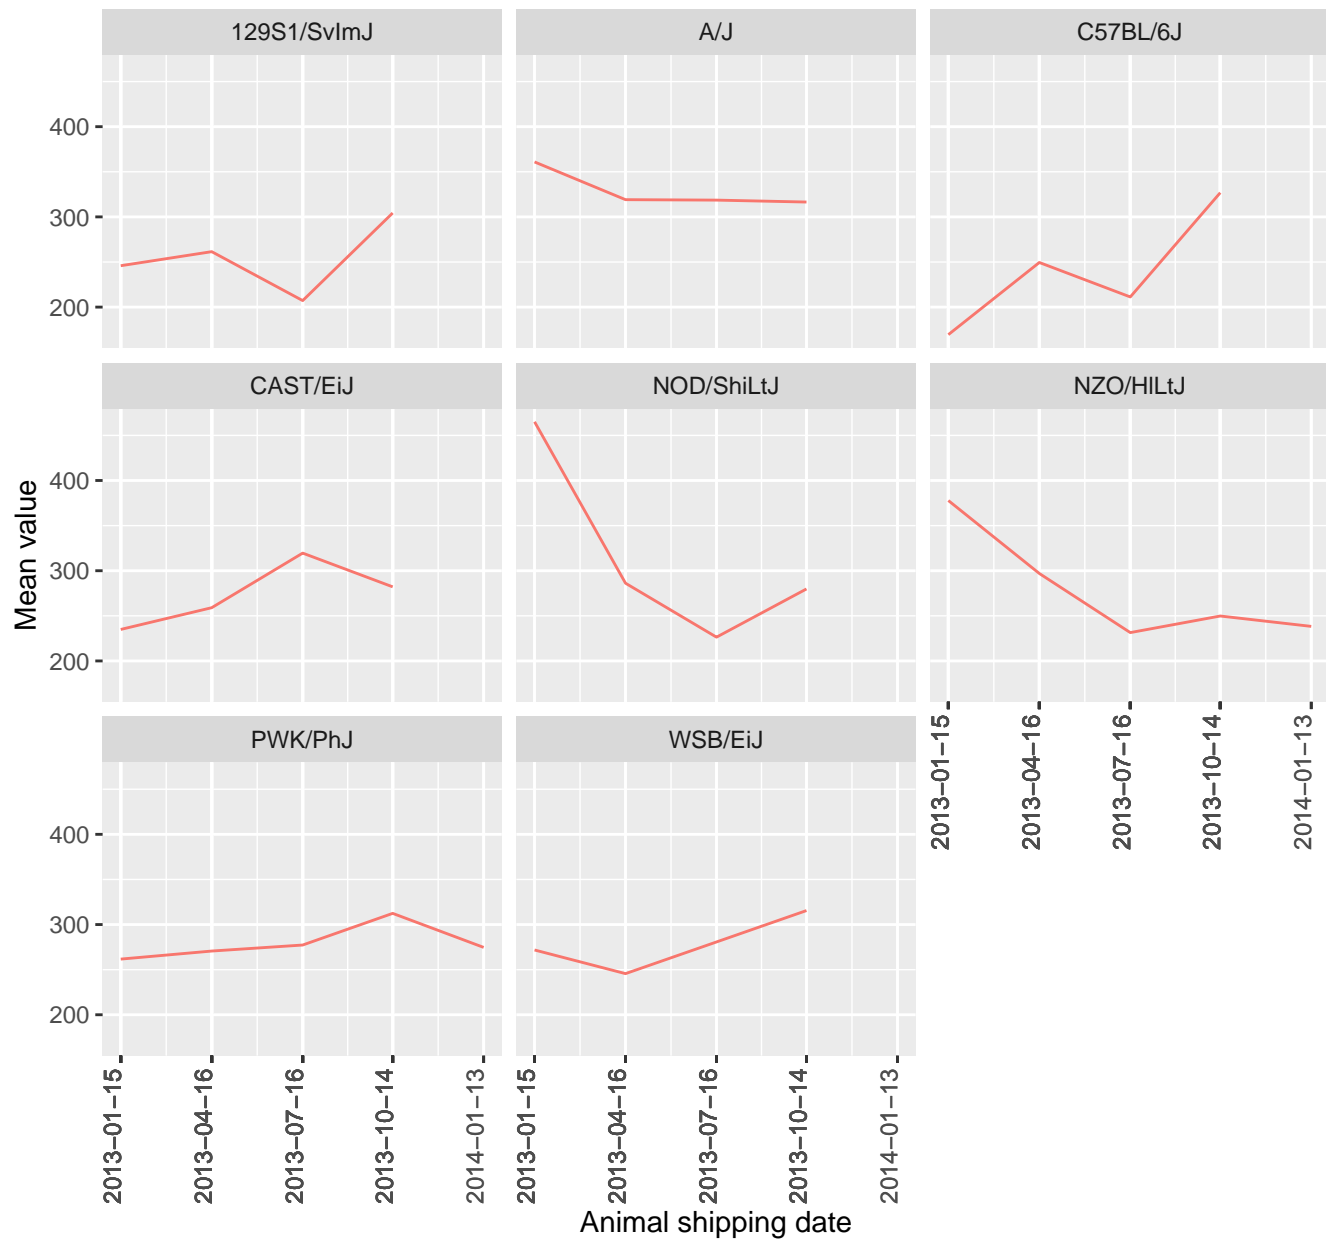

Procedure: GMC16  
Parameter: phosphate\_17

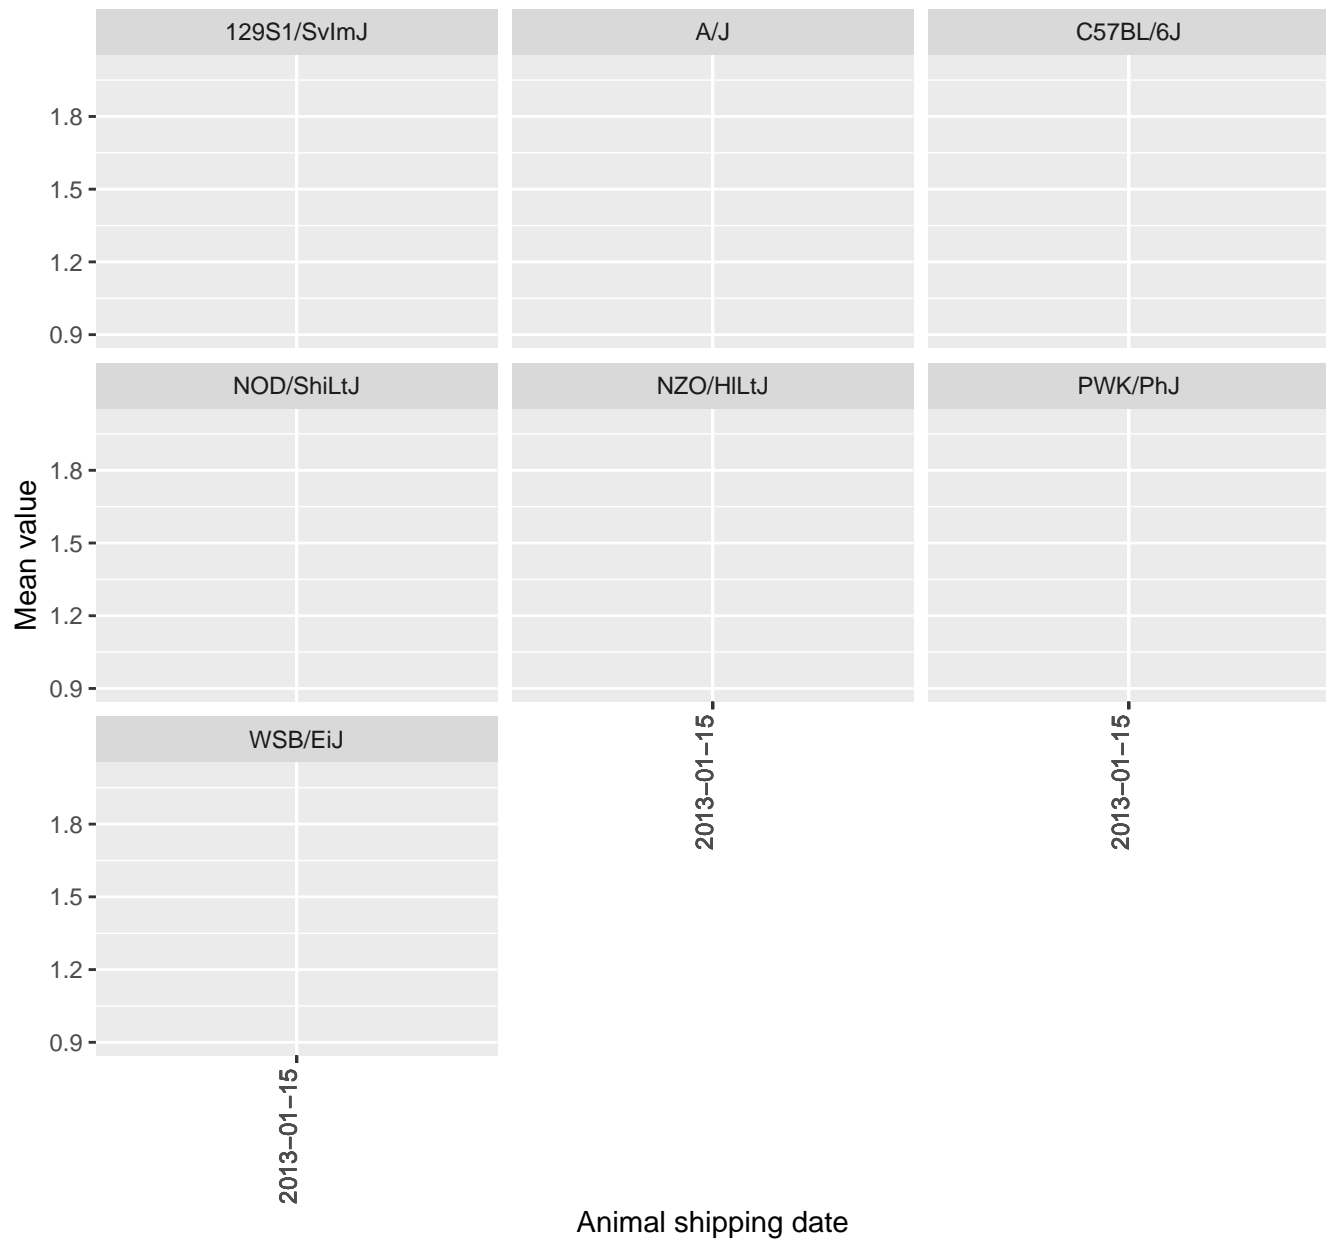

Procedure: GMC16  
Parameter: phosphate\_21

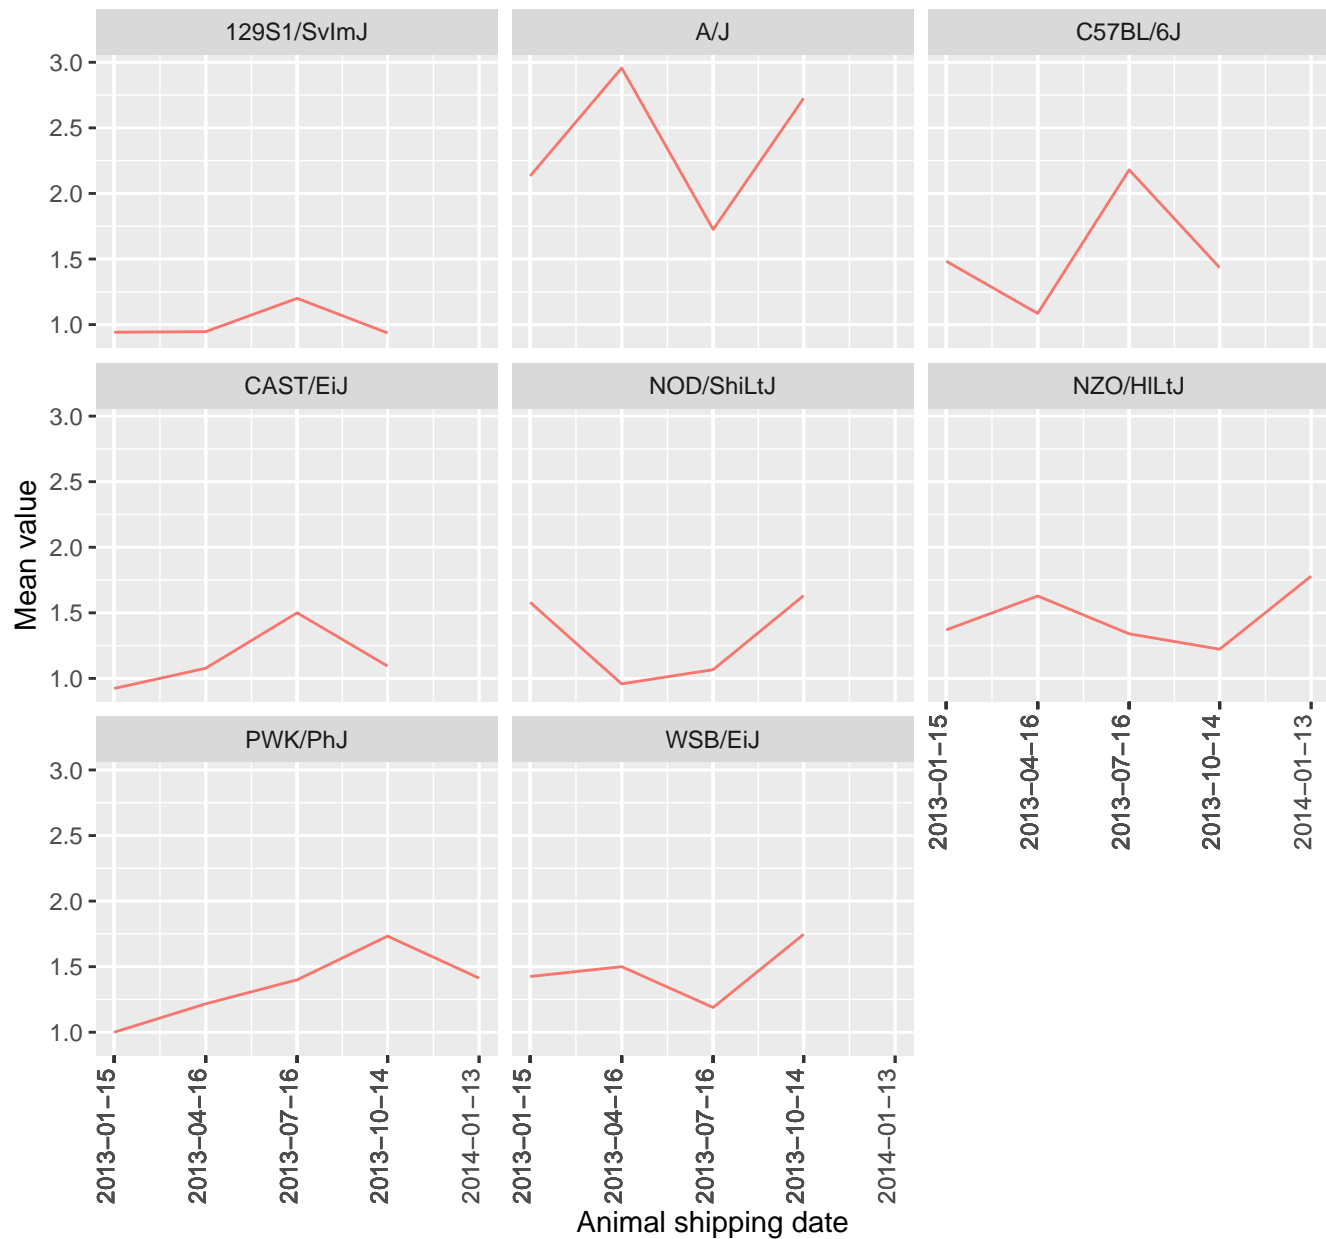

Procedure: GMC16  
Parameter: potassium\_17

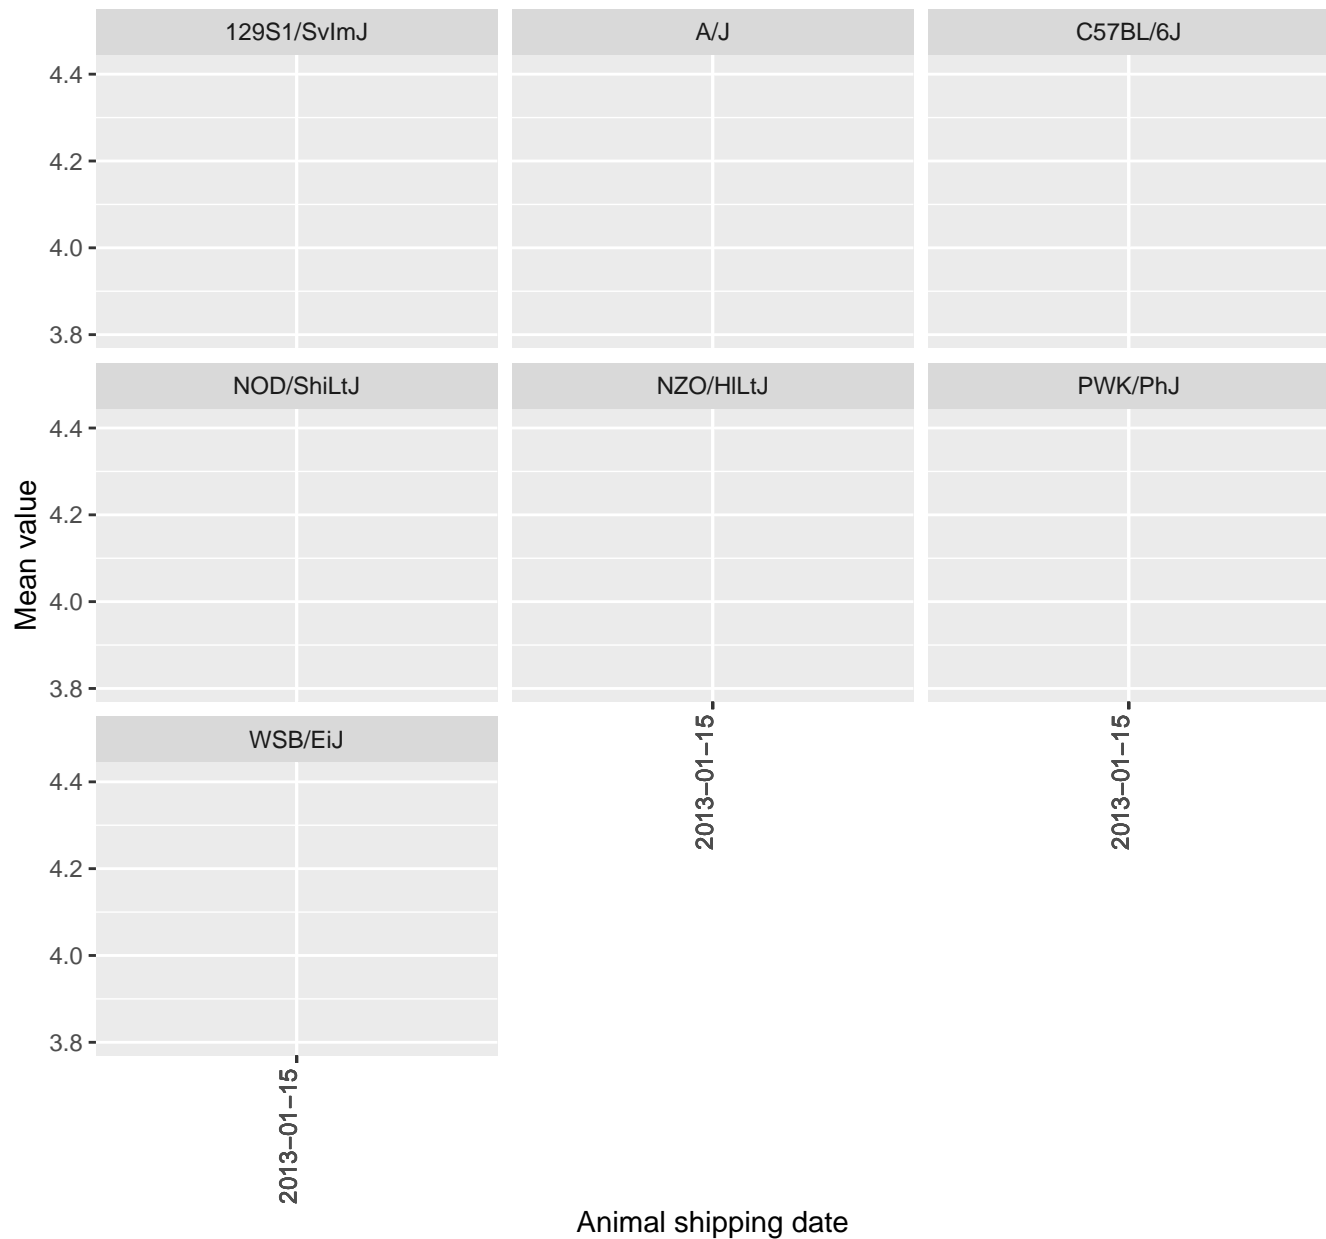

Procedure: GMC16  
Parameter: potassium\_21

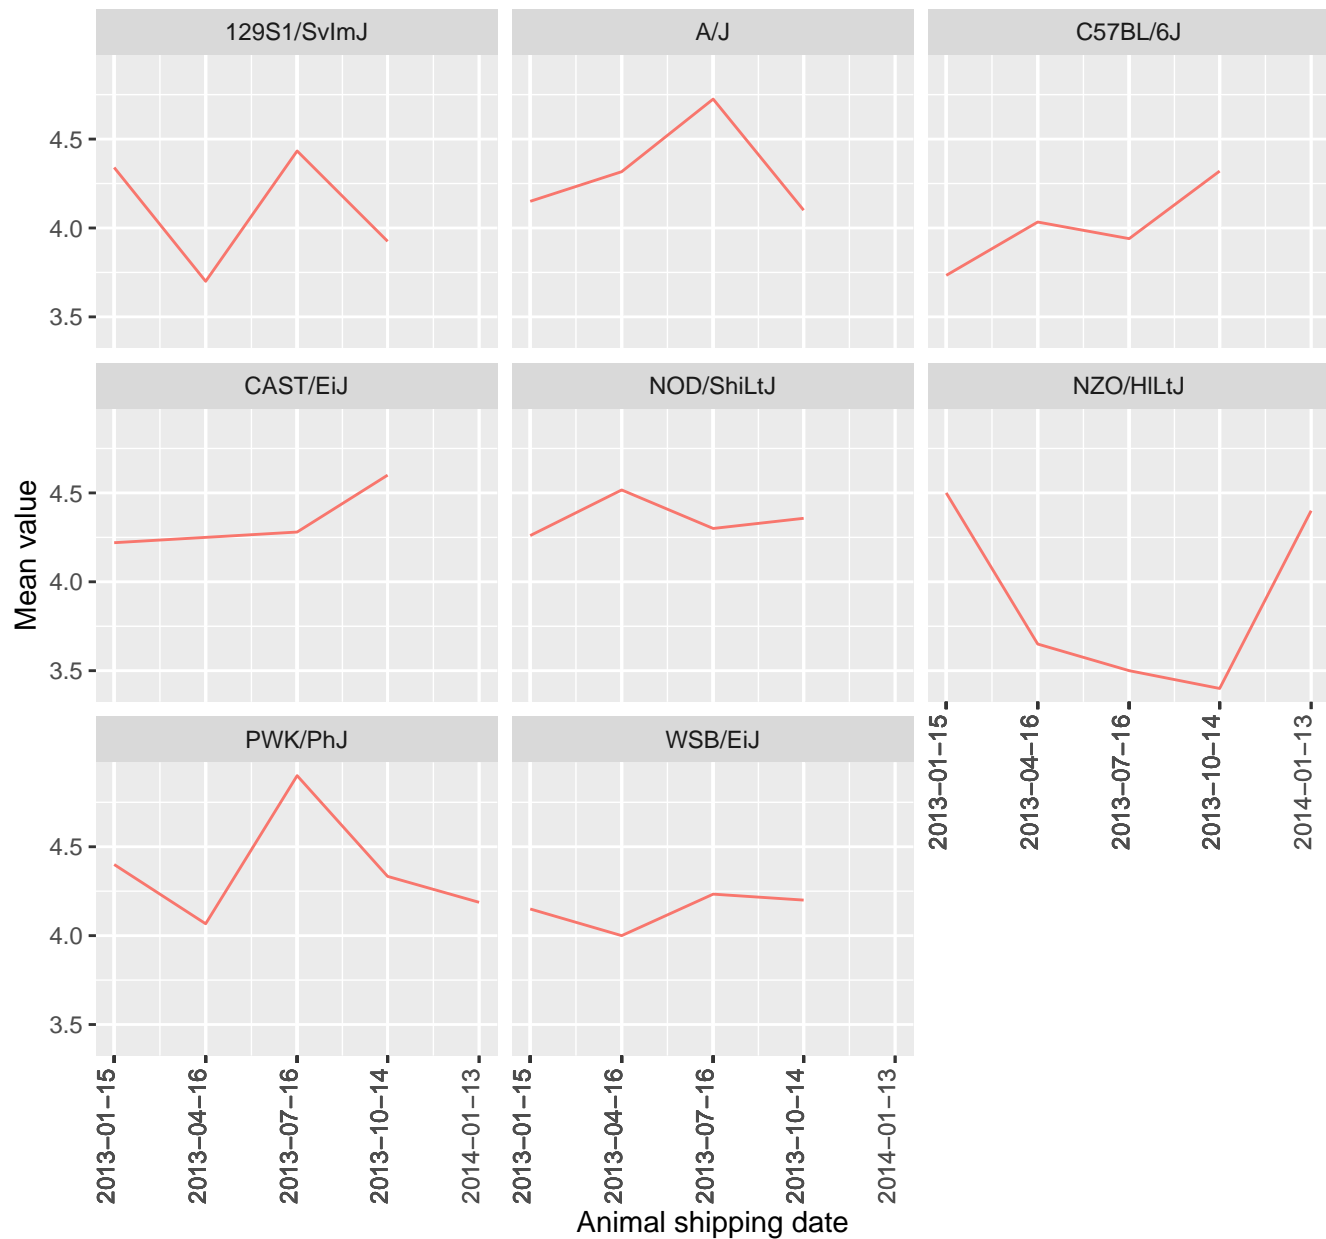



Procedure: GMC16  
Parameter: sodium\_17

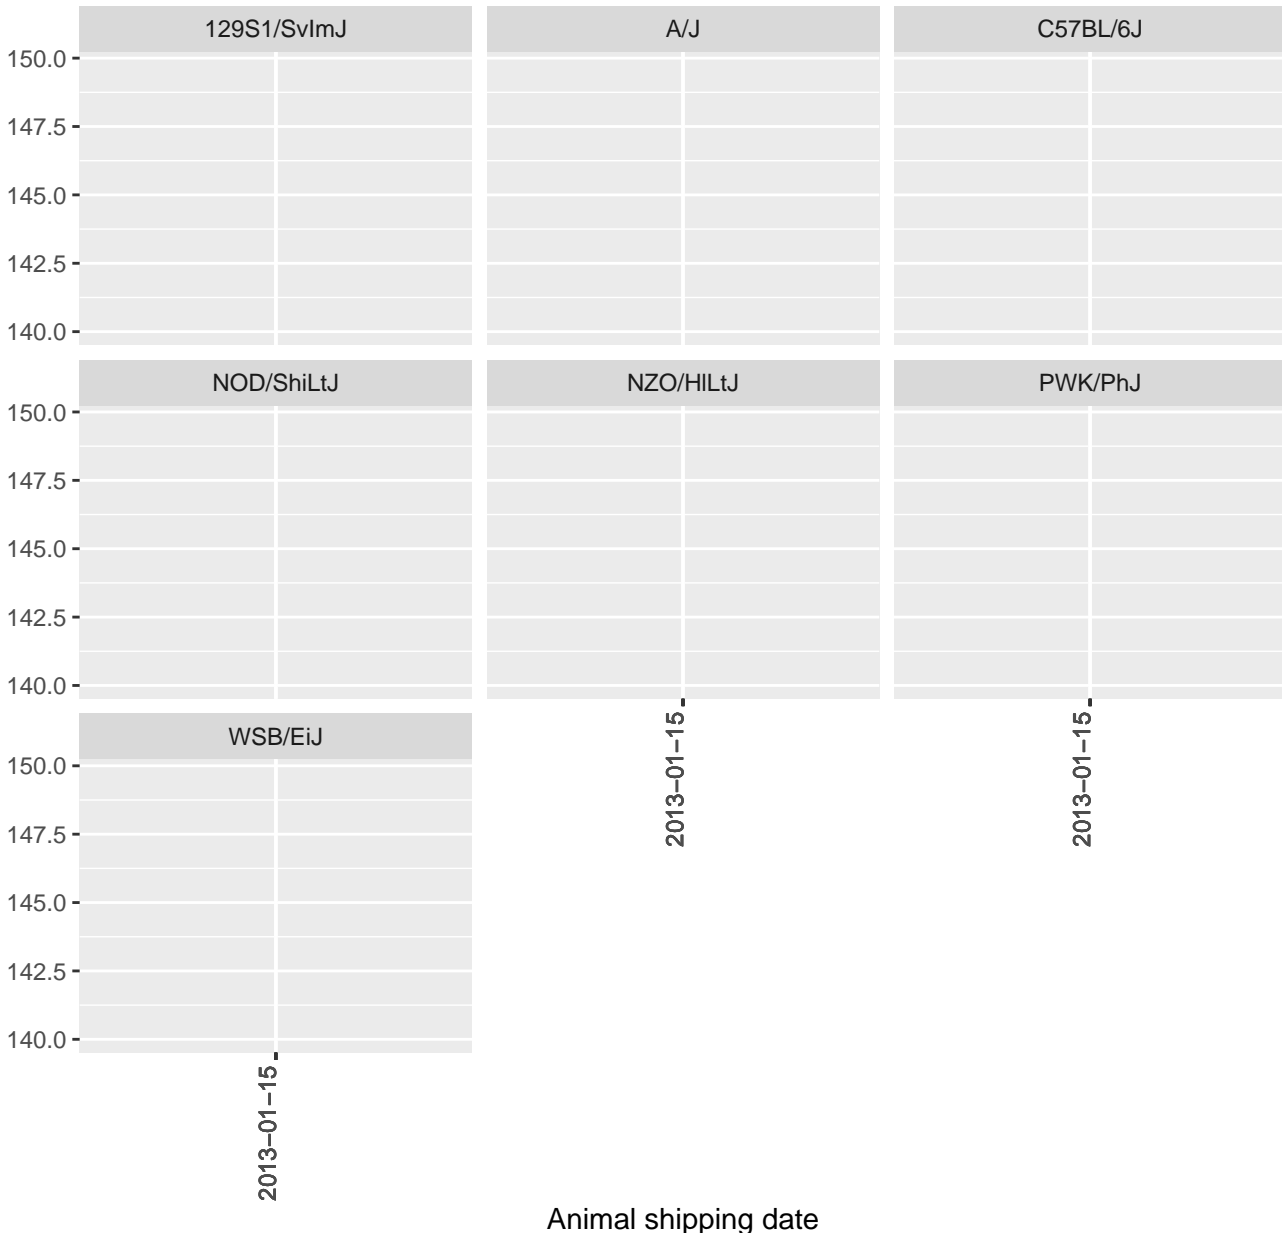

Procedure: GMC16  
Parameter: sodium\_21

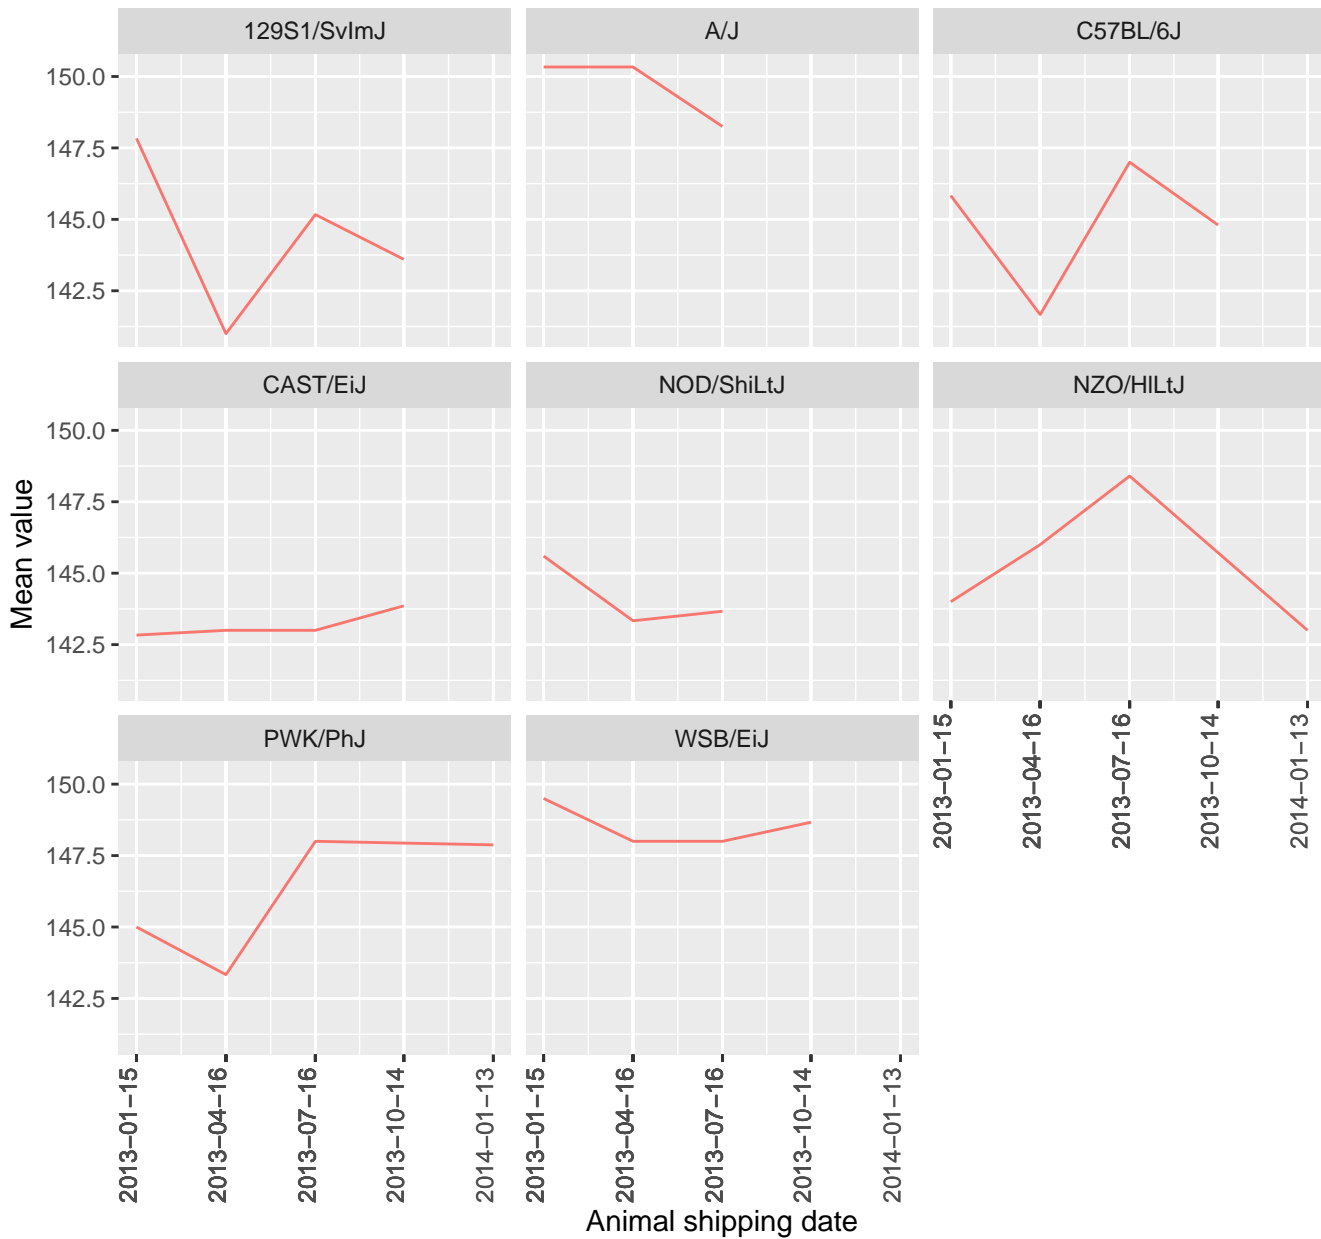

Procedure: GMC16

Parameter: TG\_17

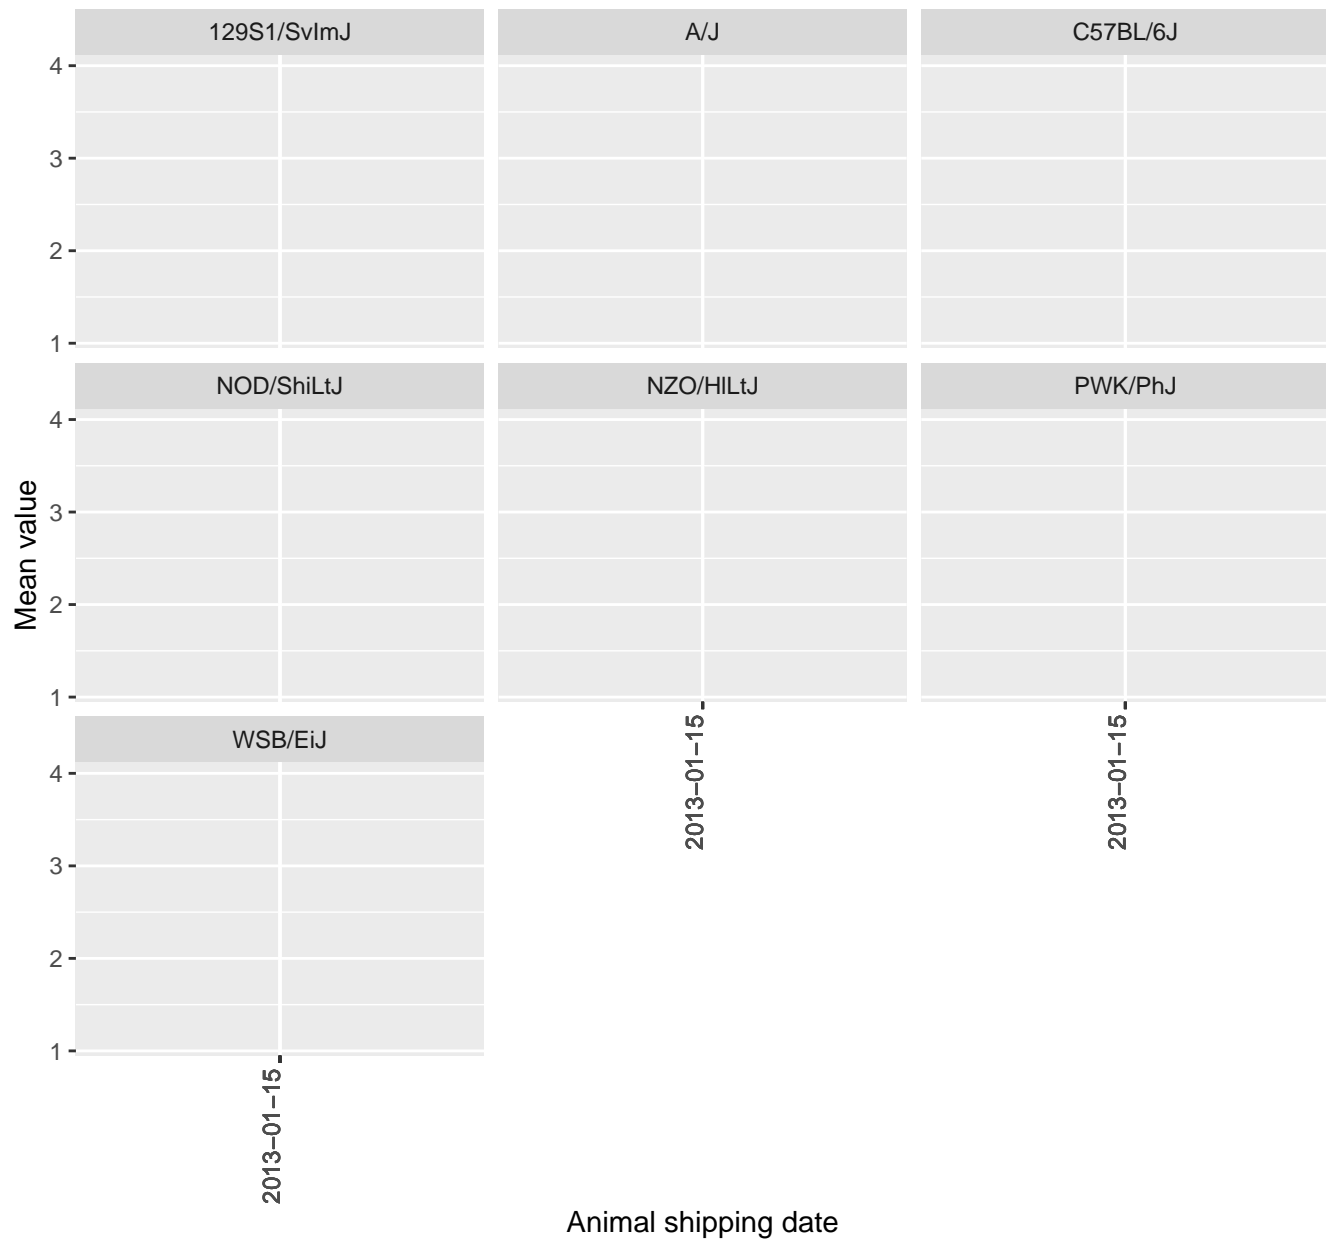

Procedure: GMC16

Parameter: TG\_21

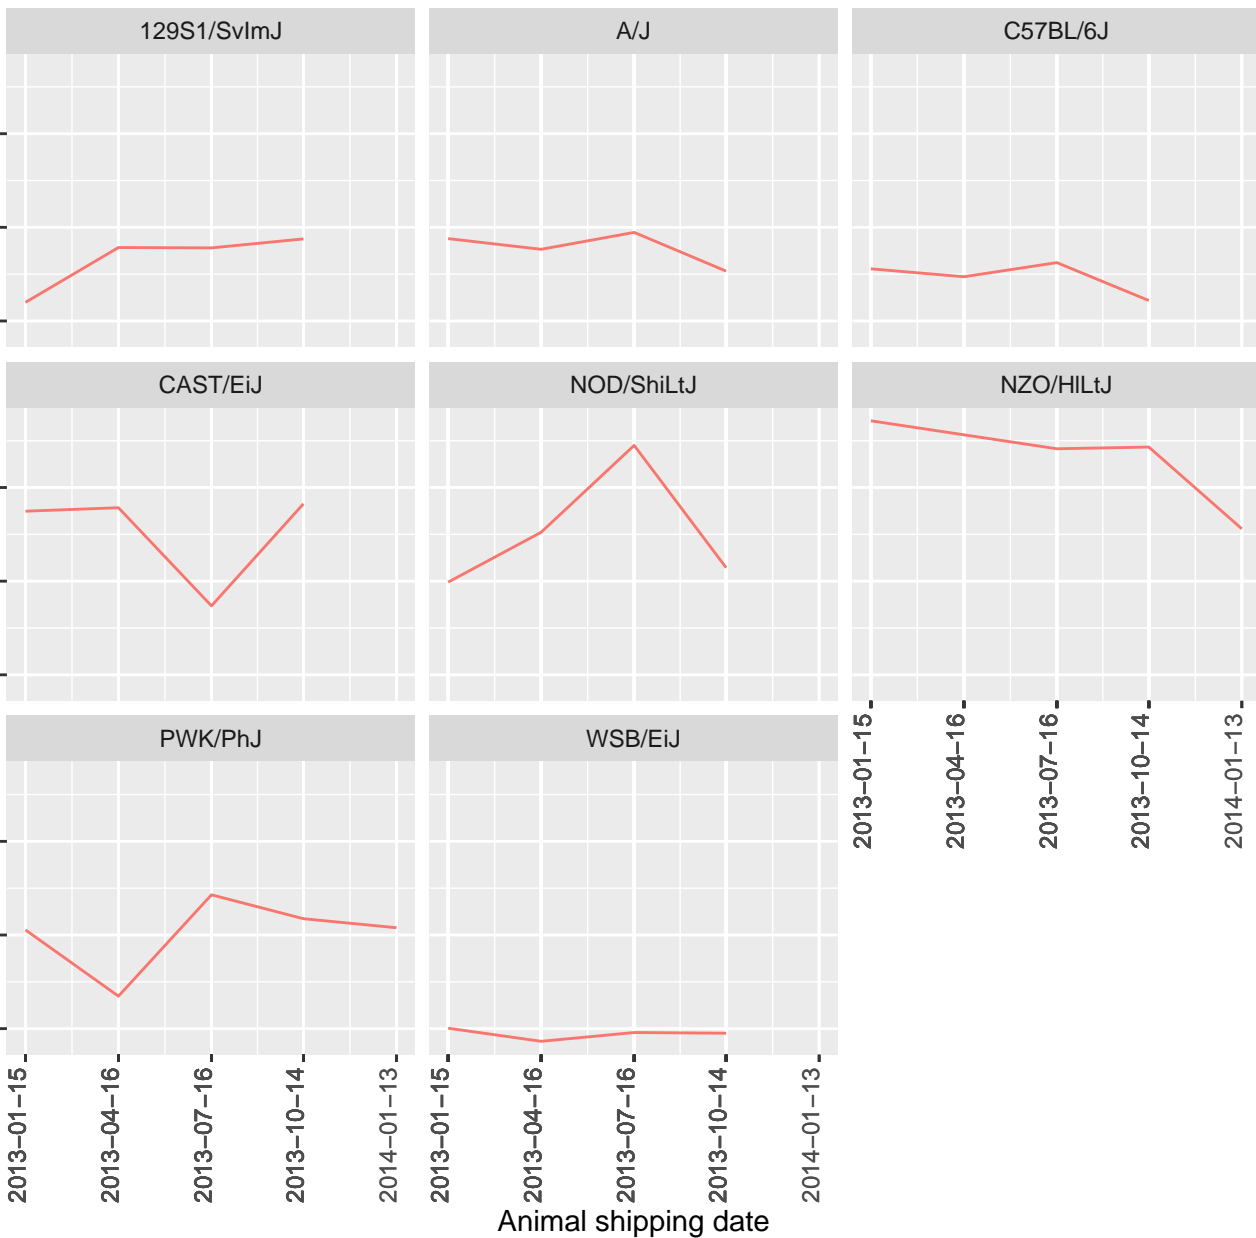

Procedure: GMC16

Parameter: total\_protein\_17

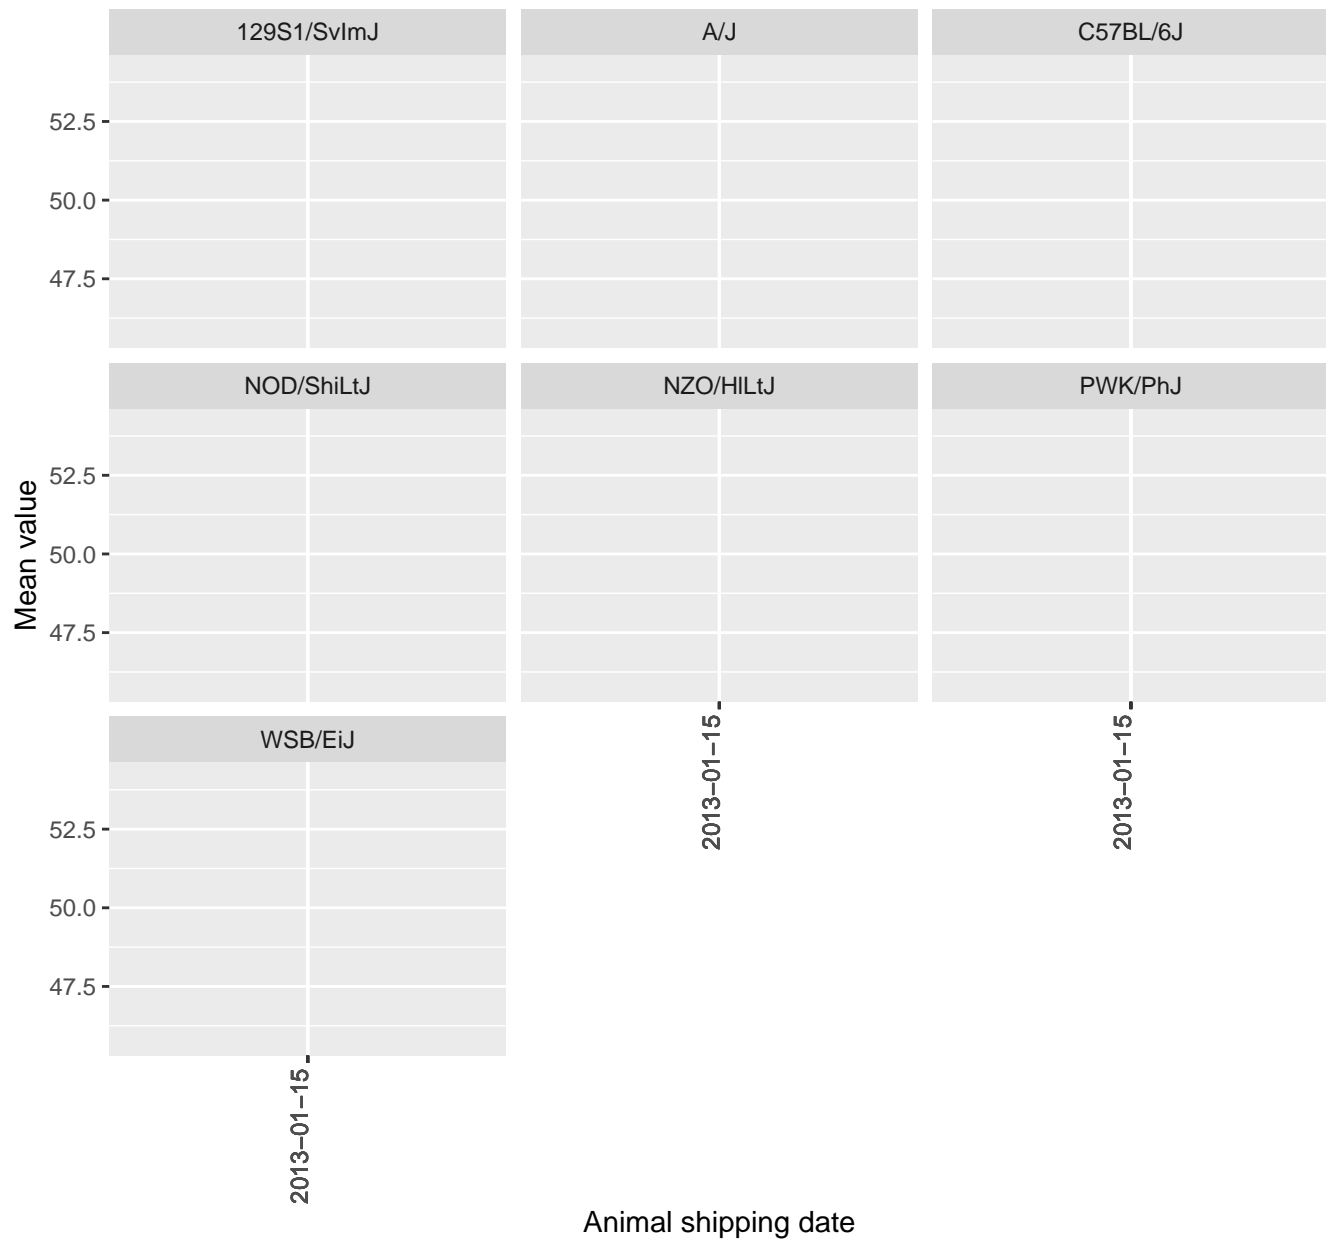

Procedure: GMC16  
Parameter: total\_protein\_21

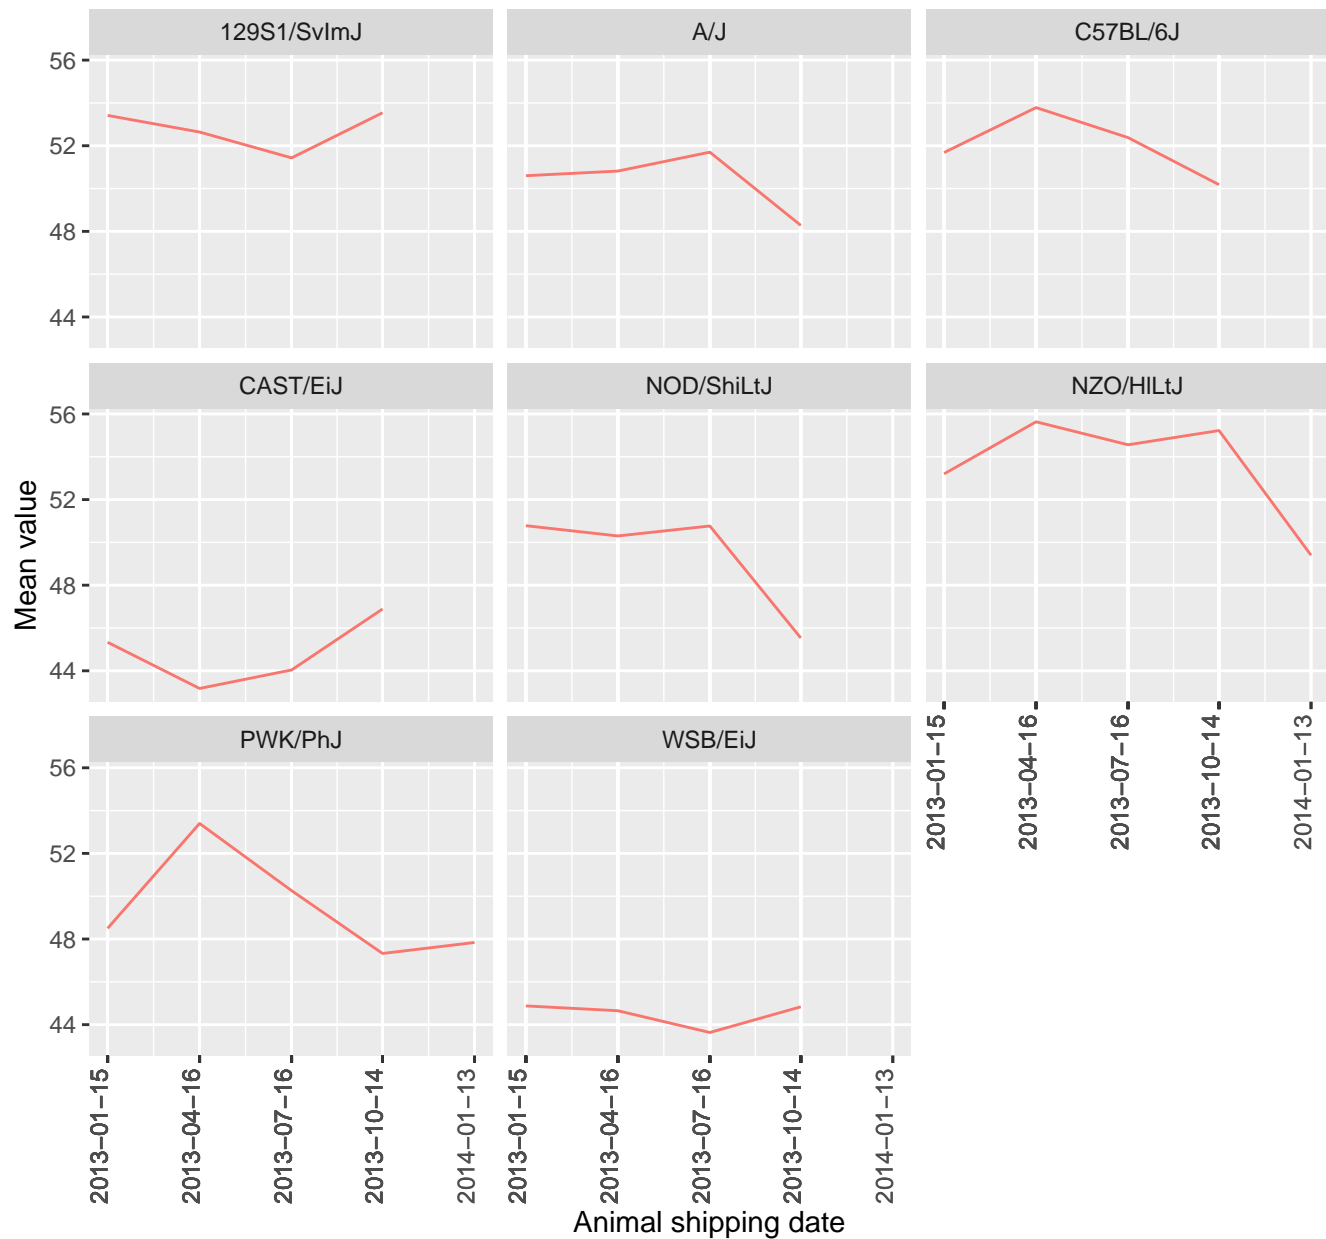

Procedure: GMC16  
Parameter: urea\_17

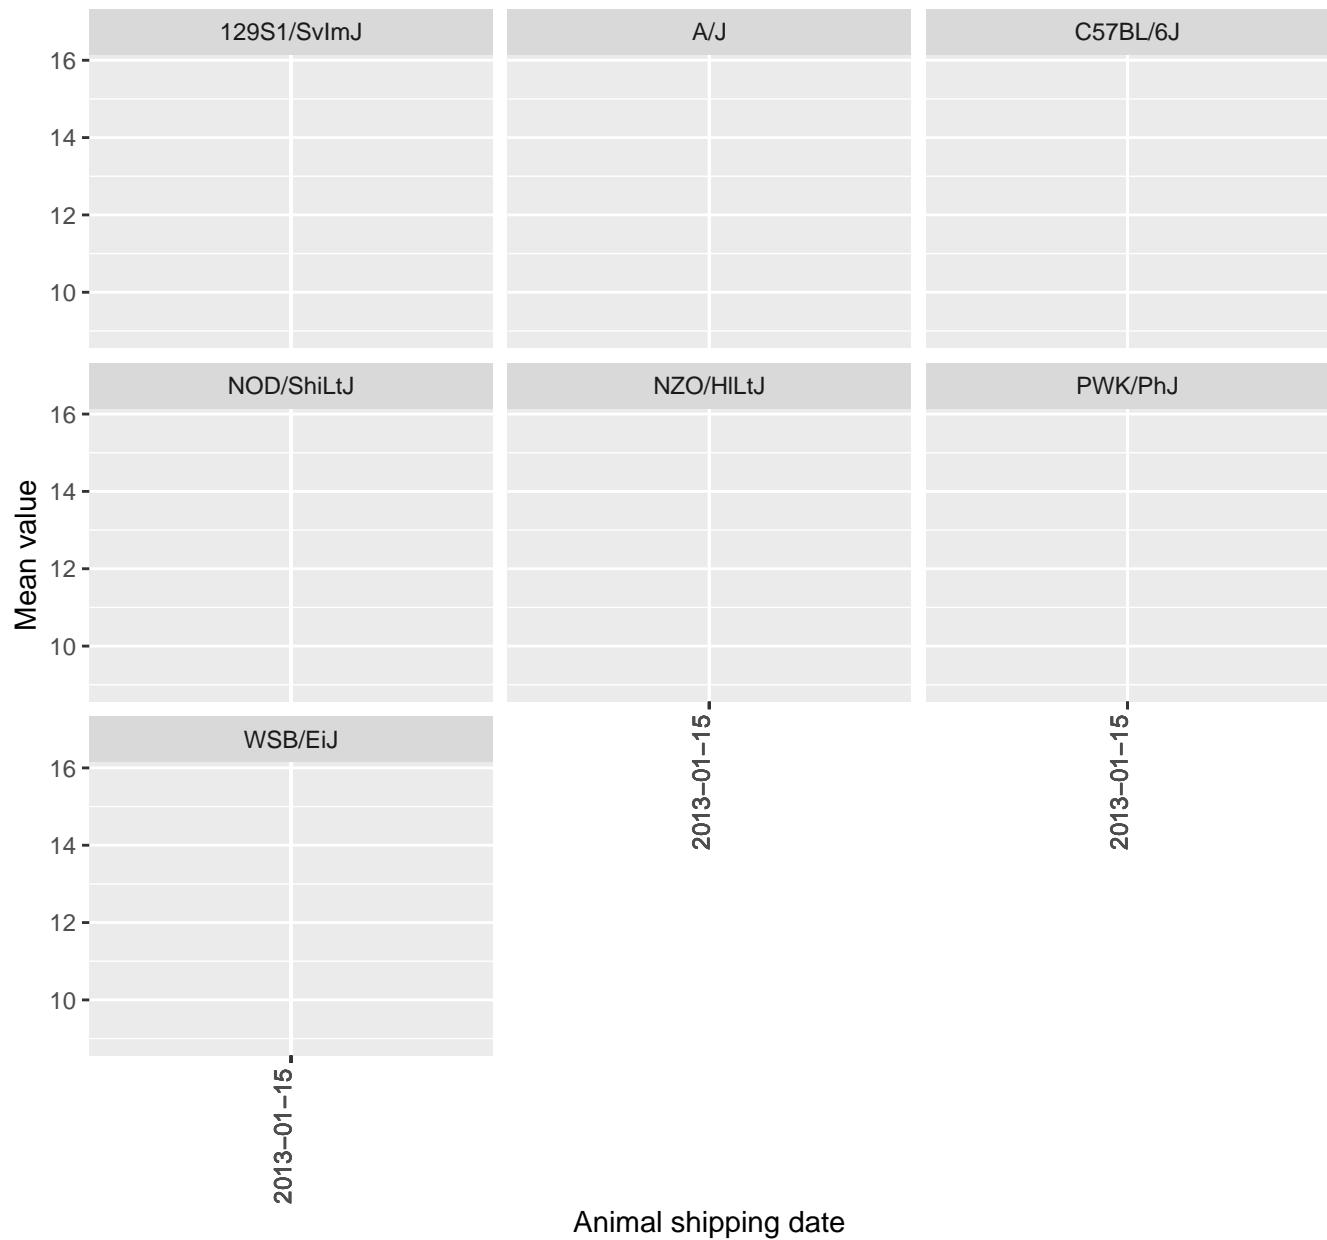

Procedure: GMC16  
Parameter: urea\_21

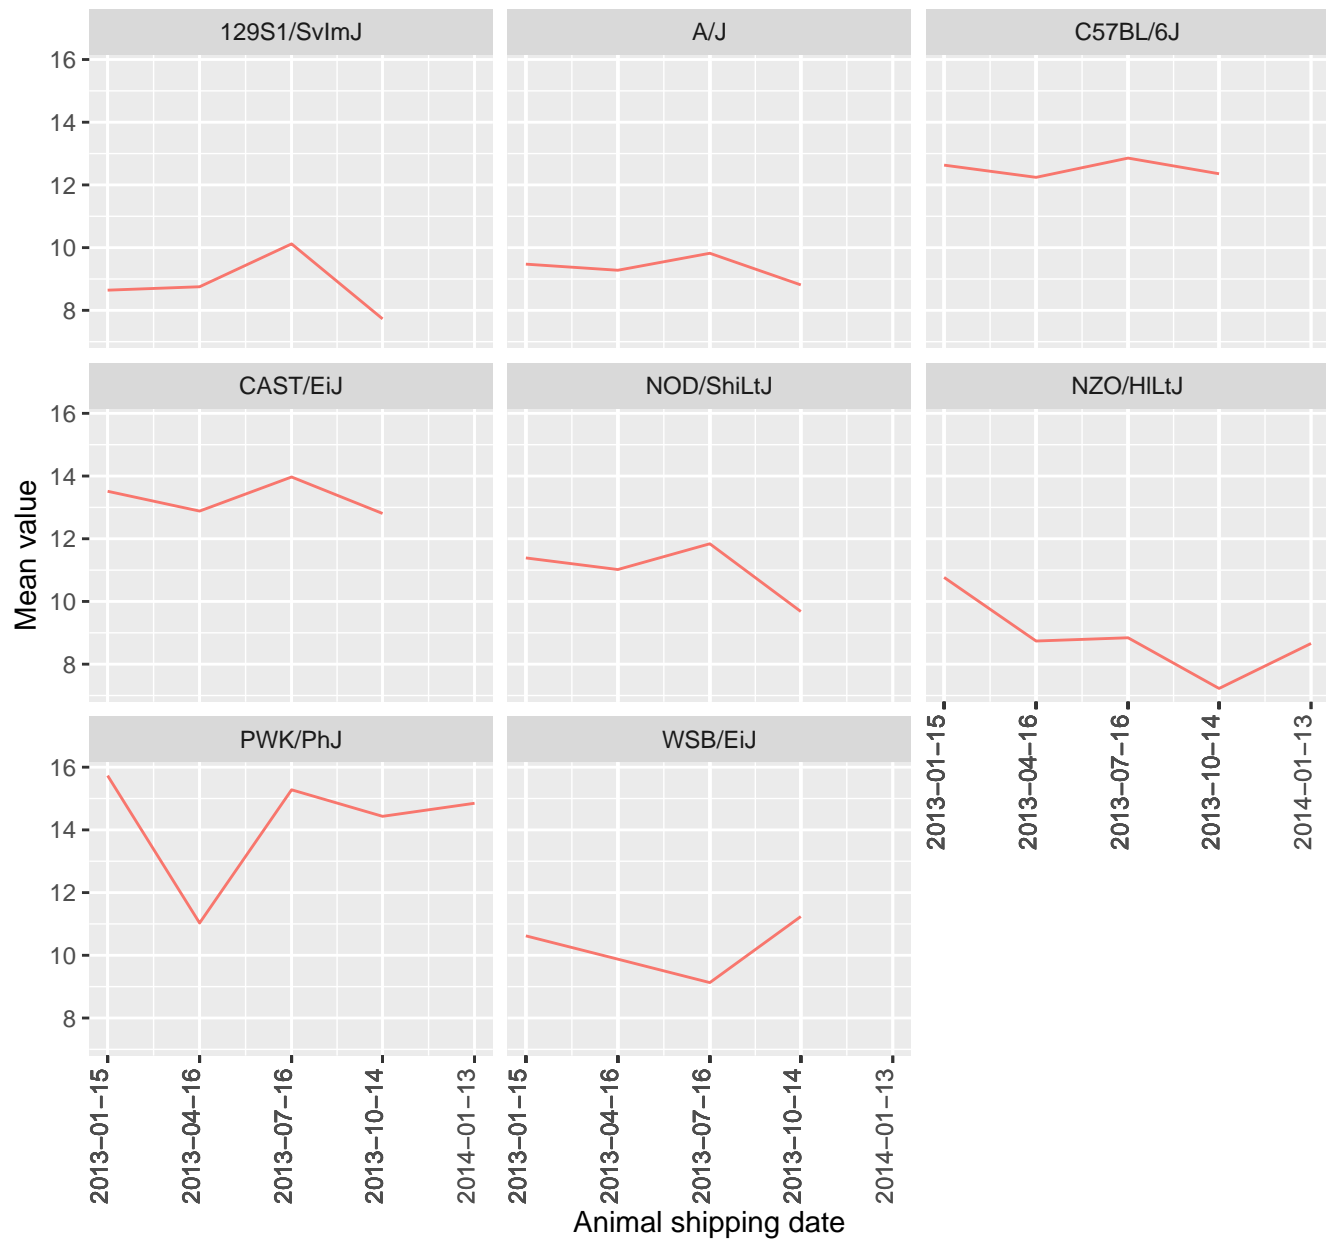



Procedure: GMC17

Parameter: click

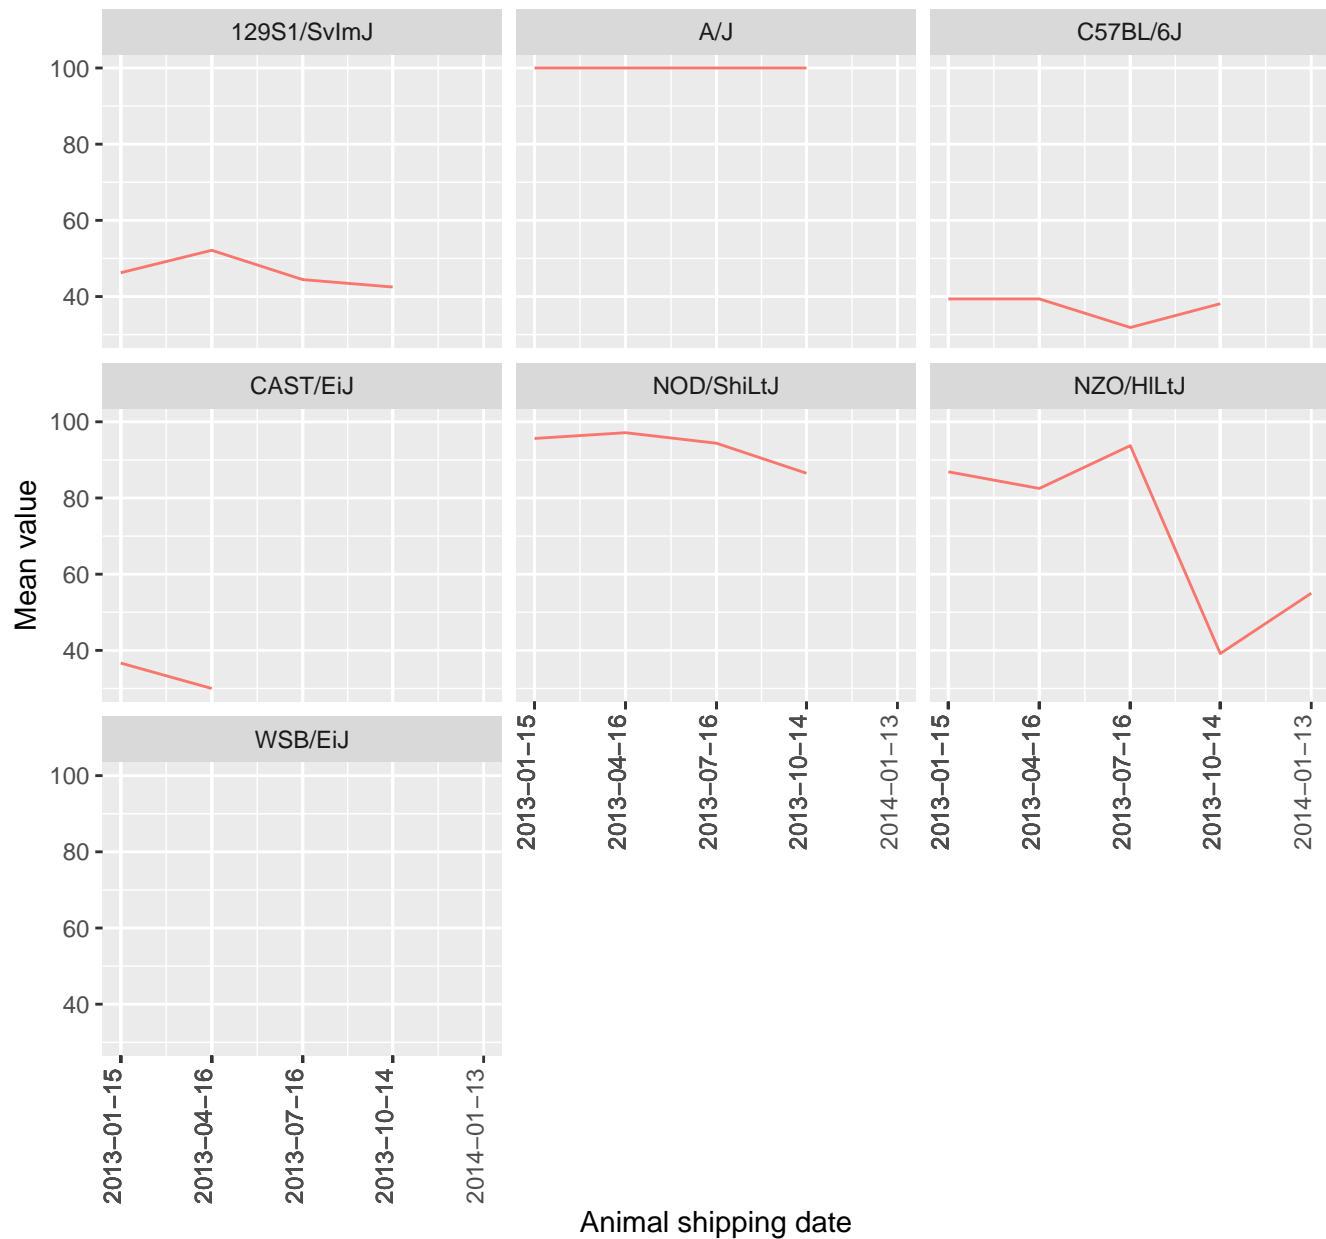

Procedure: GMC17

Parameter: pip\_12

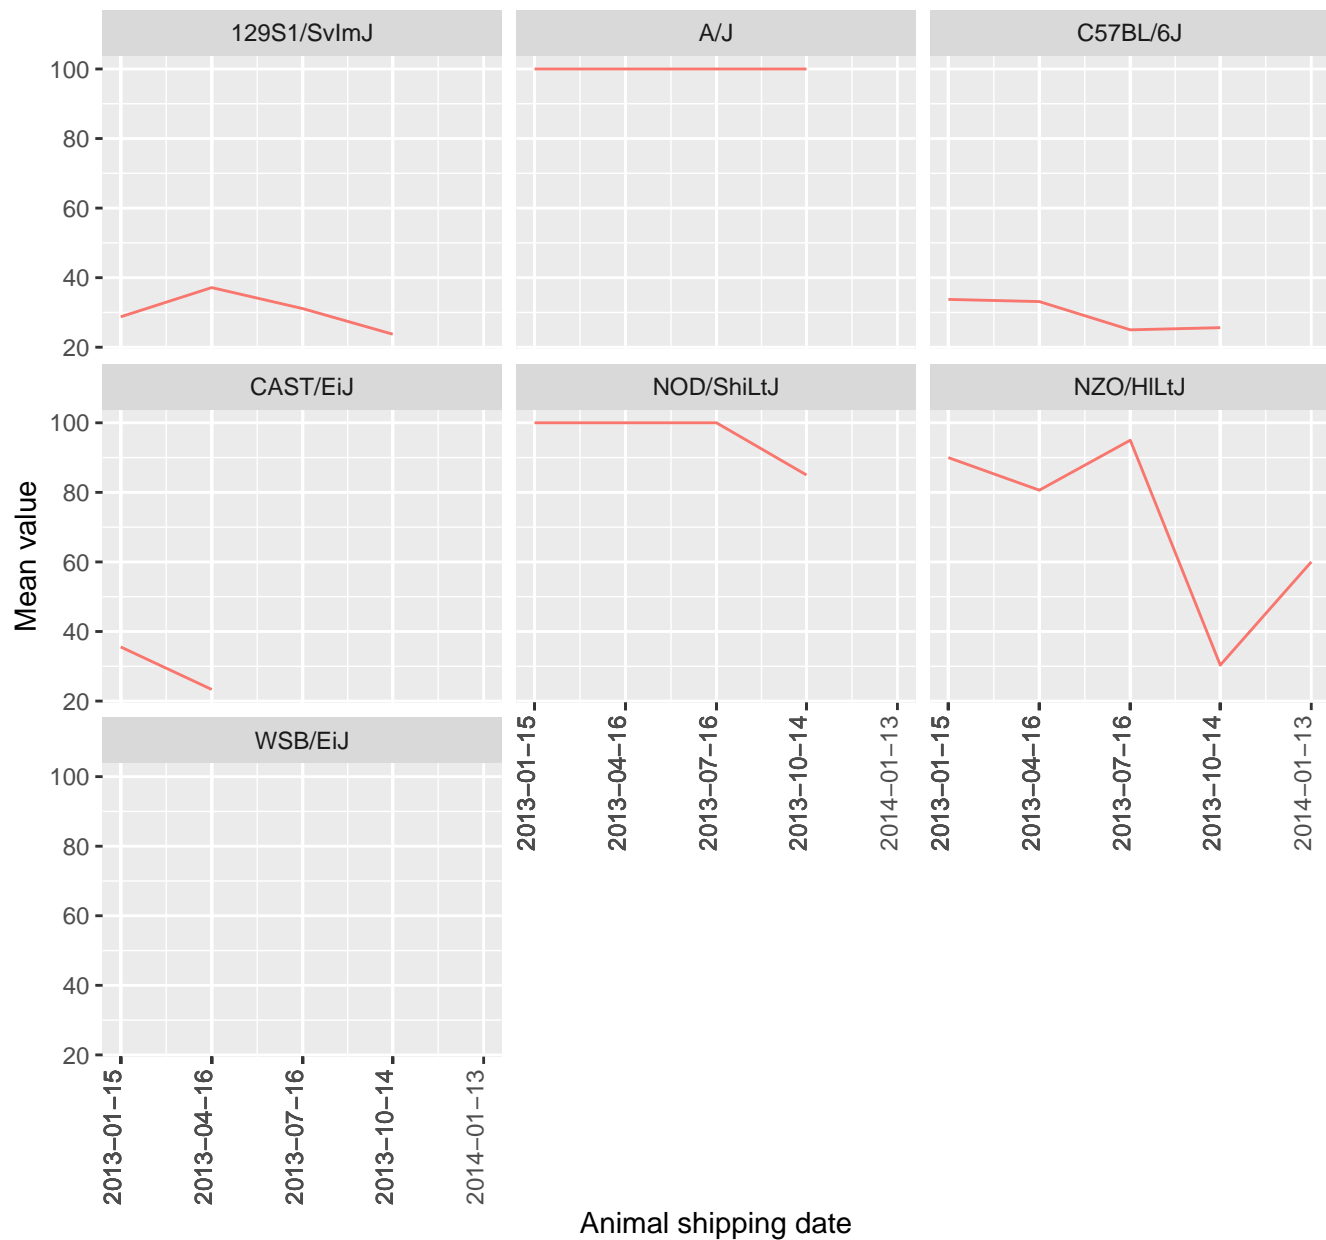

Procedure: GMC17

Parameter: pip\_18

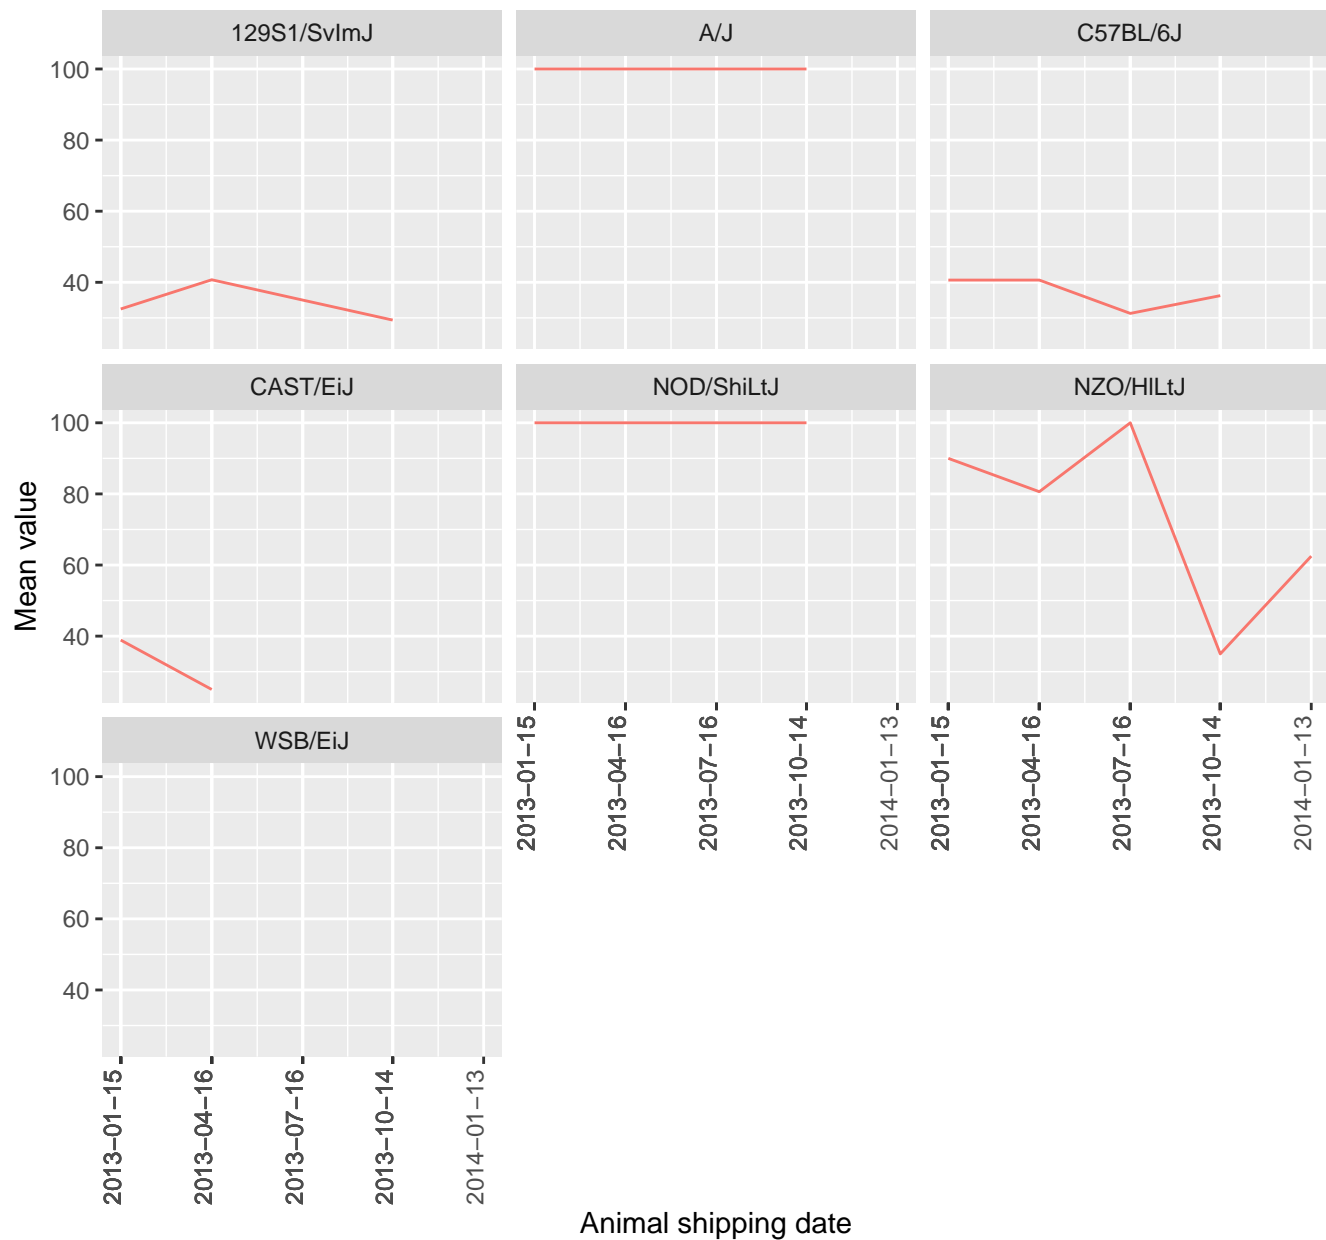

Procedure: GMC17

Parameter: pip\_24

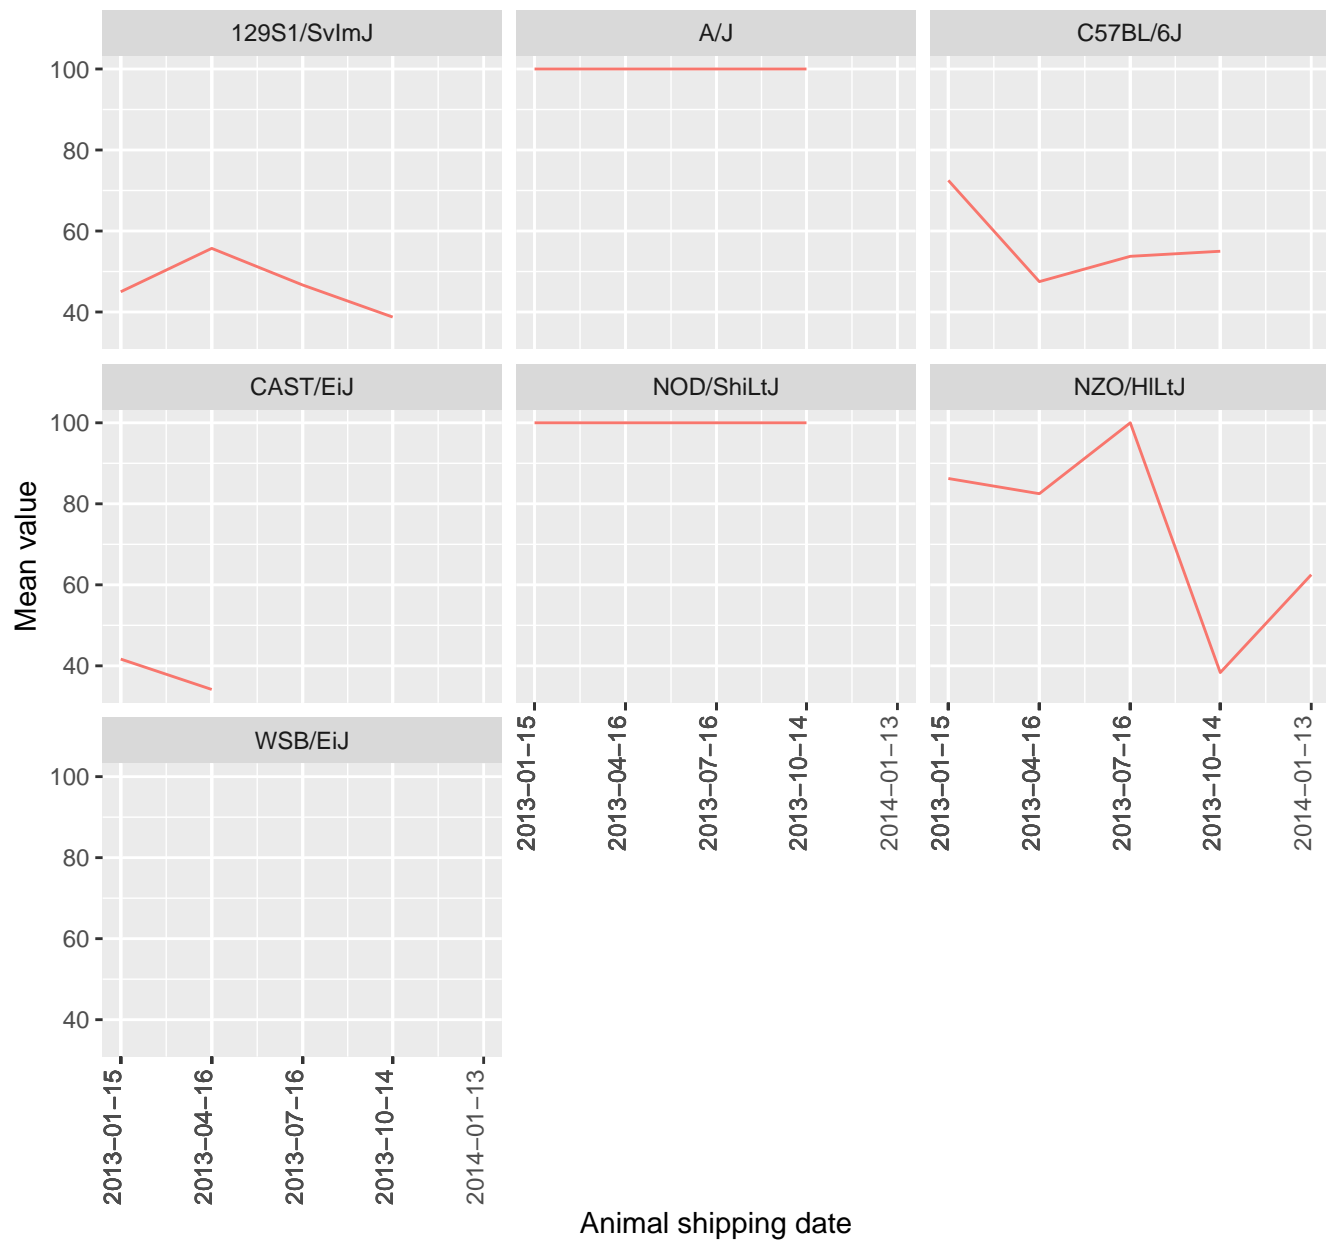

Procedure: GMC17

Parameter: pip\_30

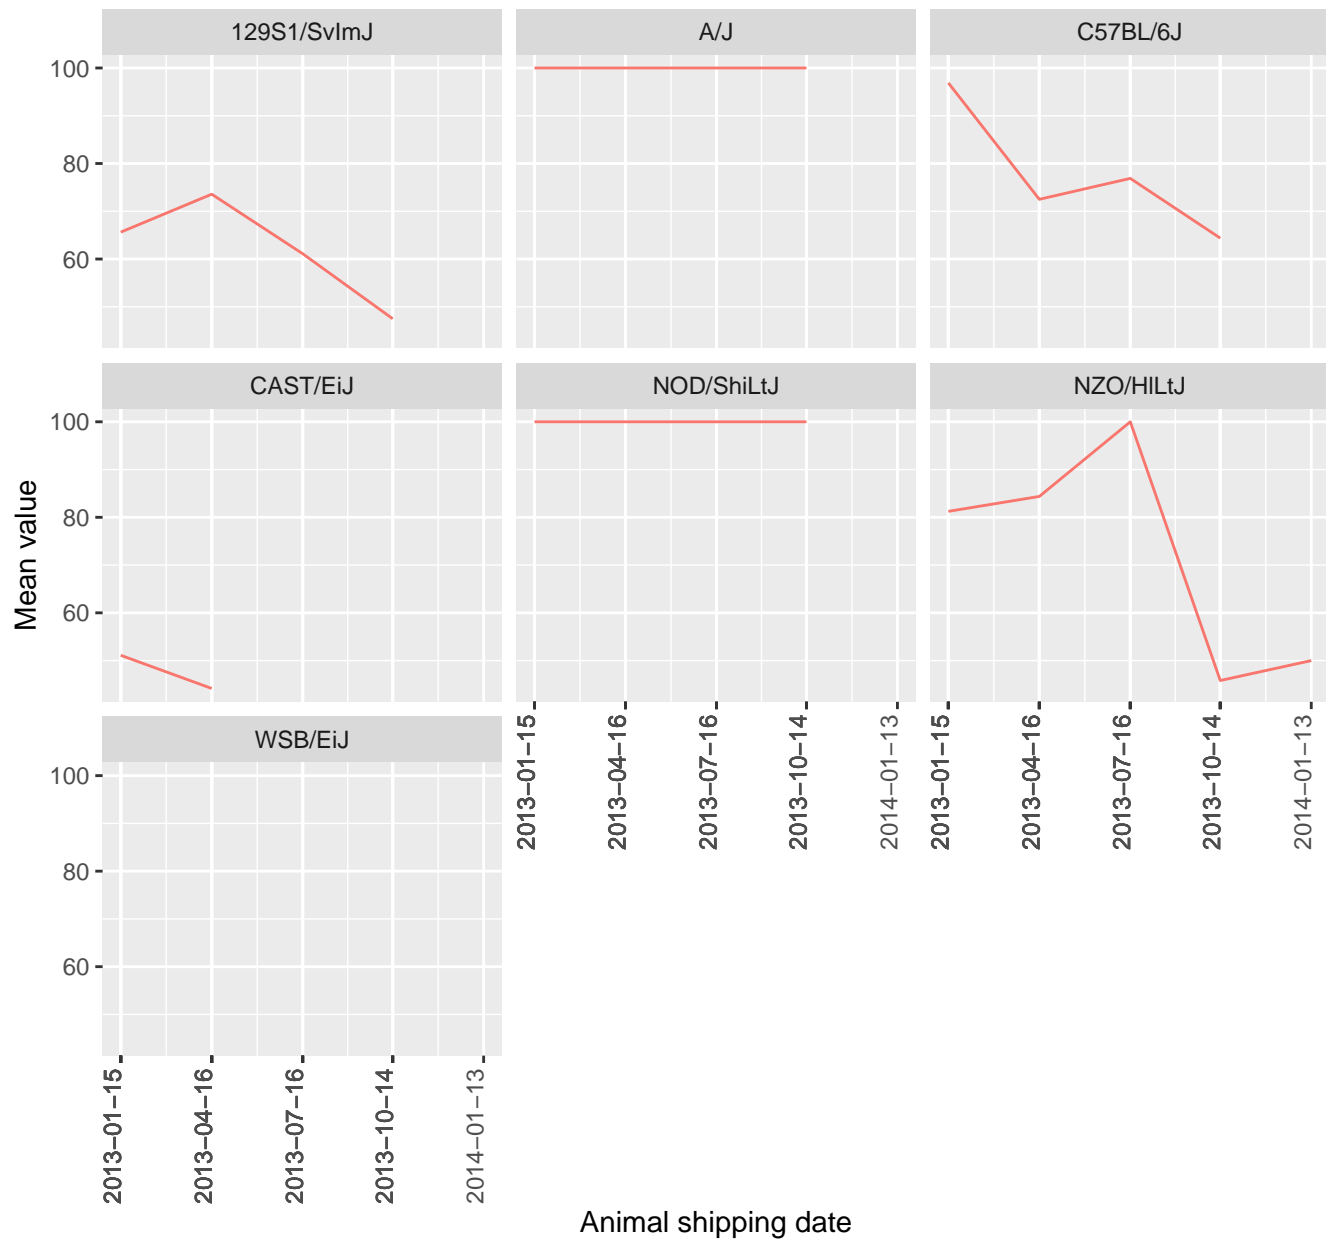

Procedure: GMC17

Parameter: pip\_6

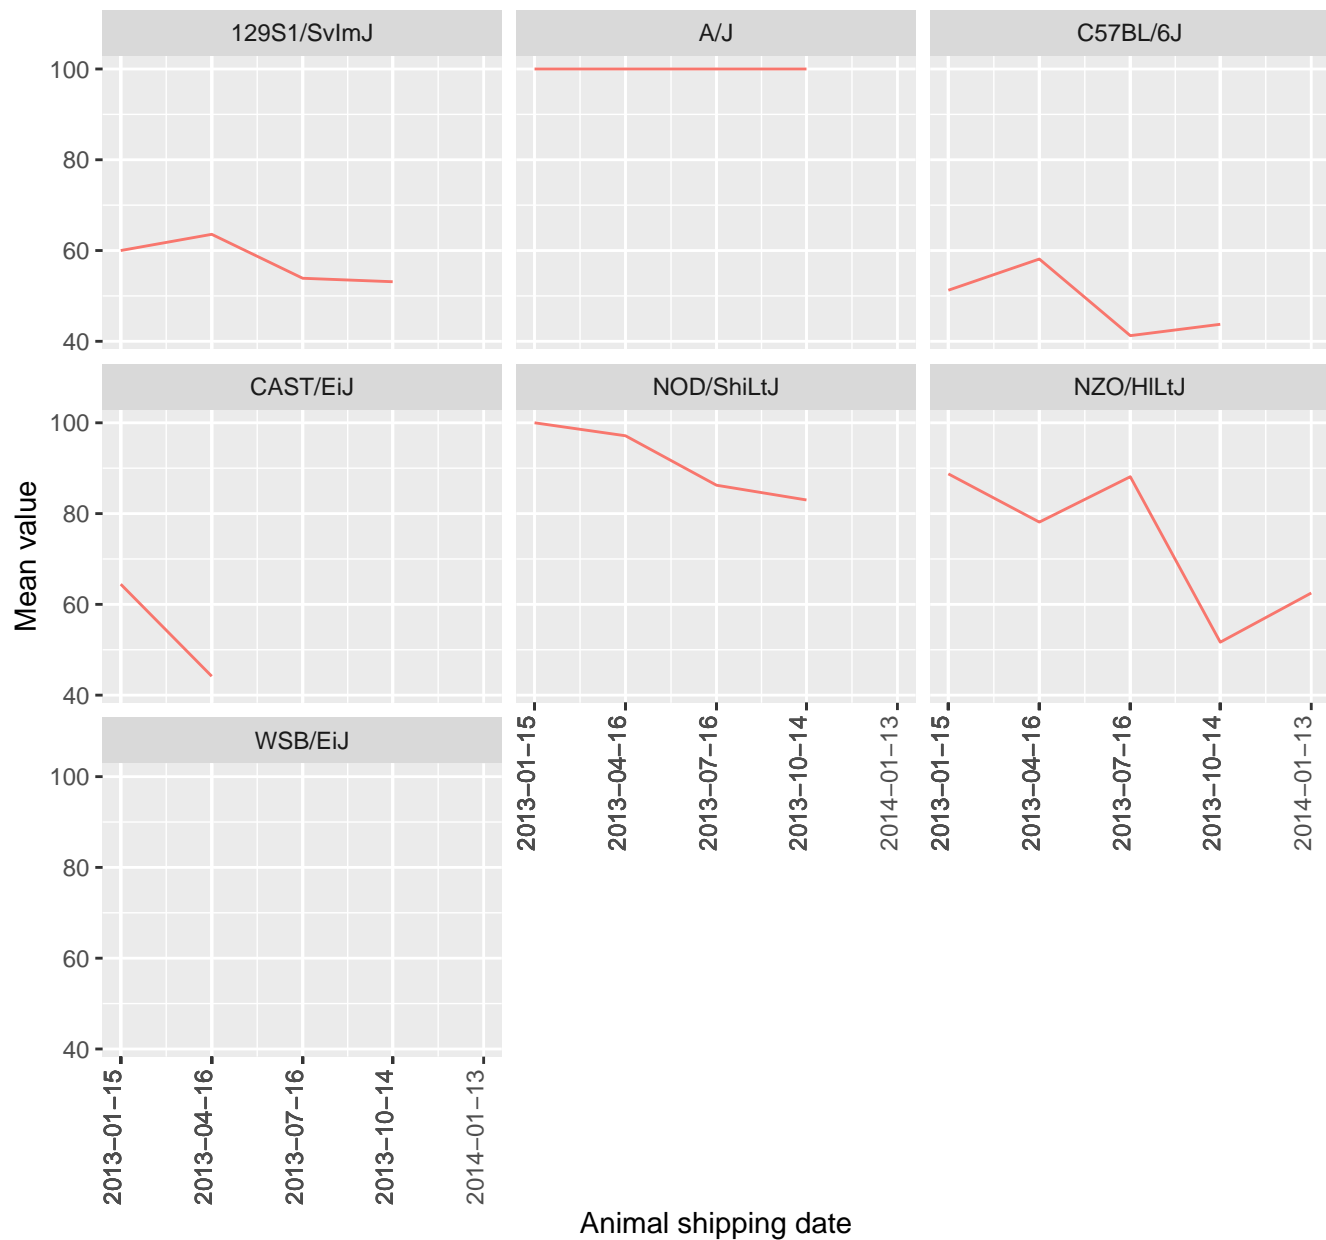

Procedure: GMC18

Parameter: BMD\_wholebody

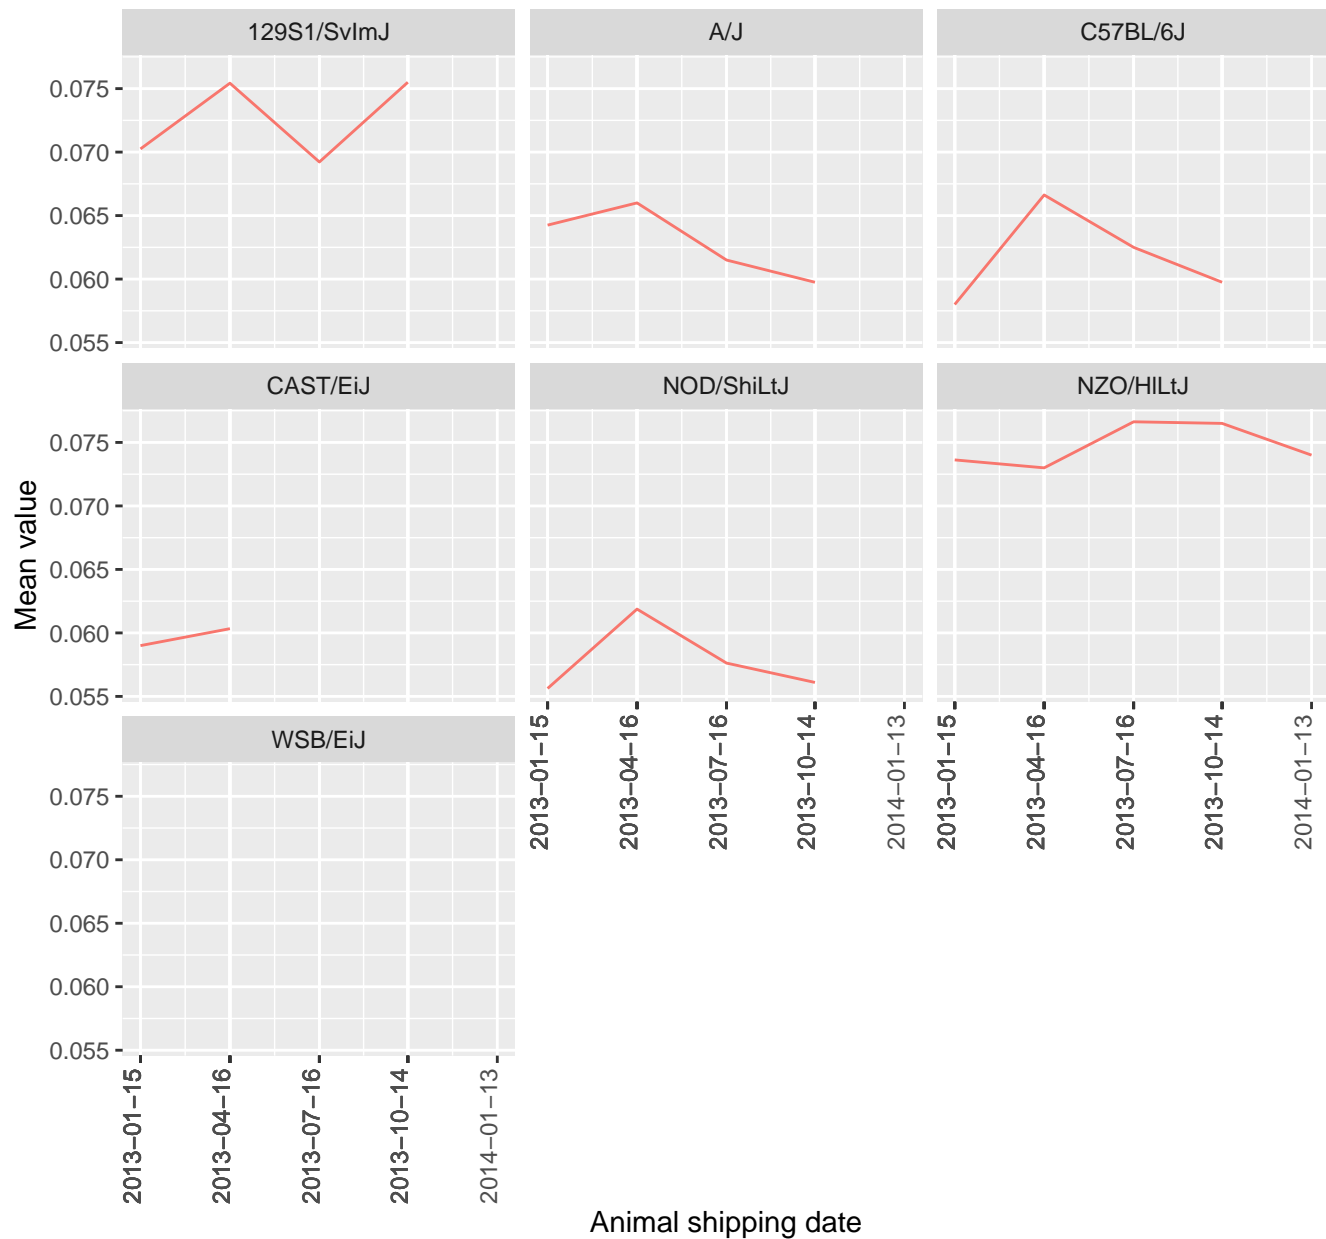

Procedure: GMC18  
Parameter: BMD\_Xhead

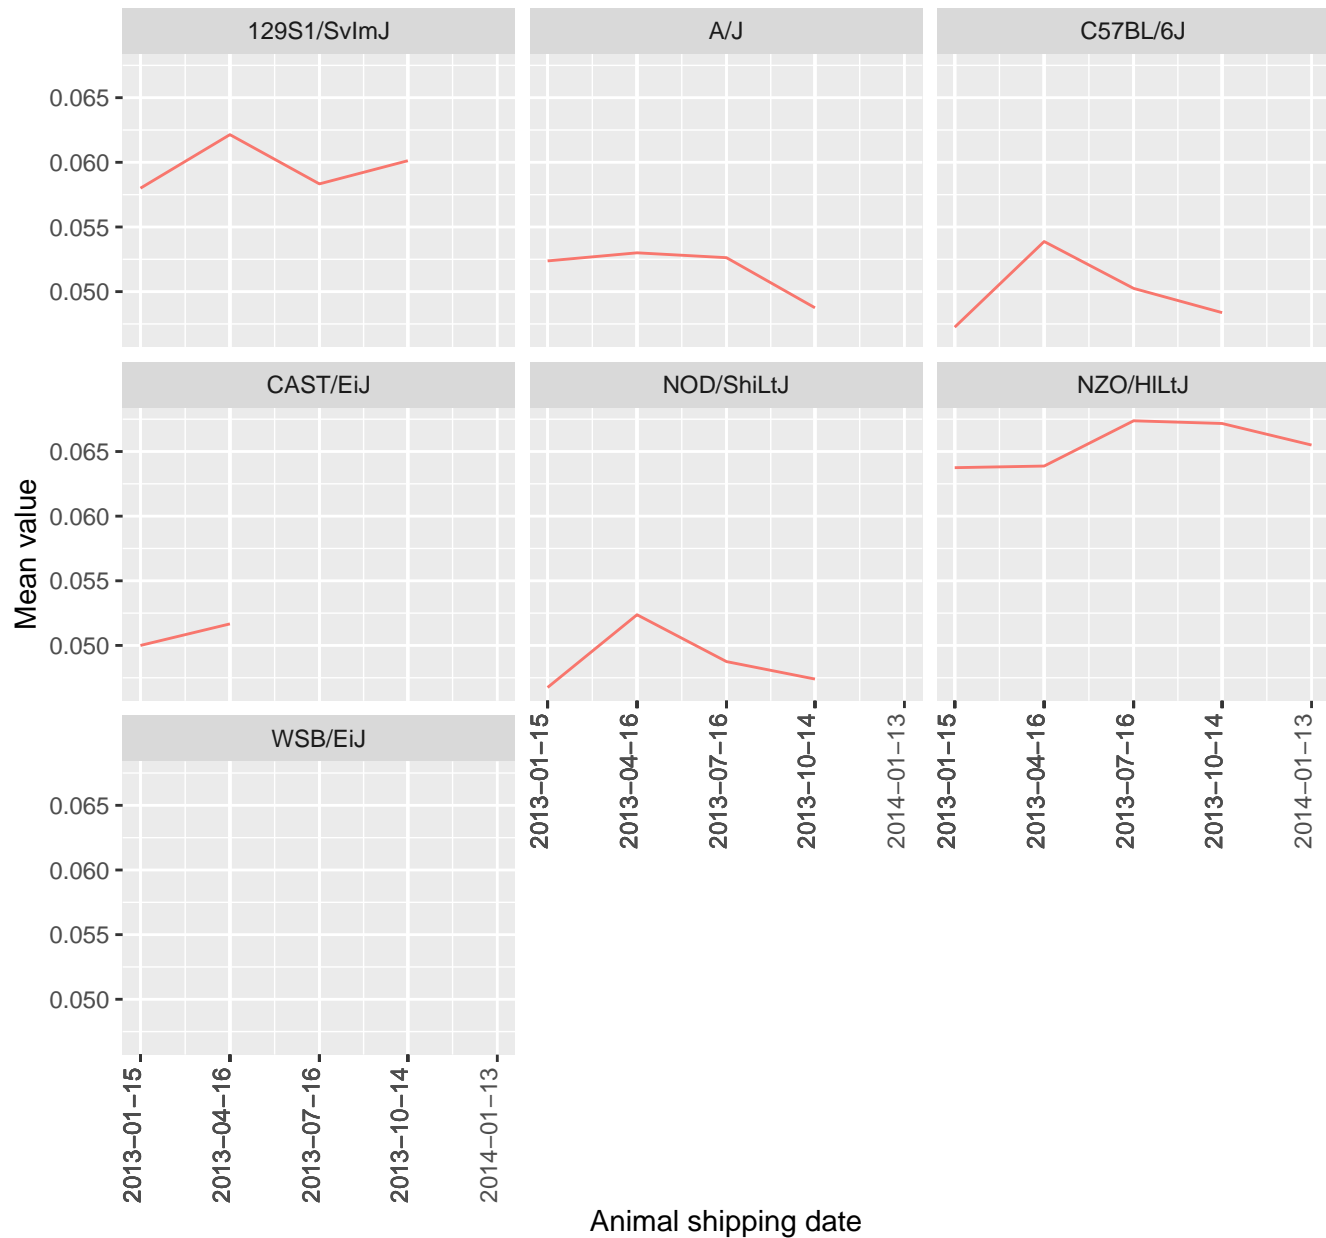



Procedure: GMC18  
Parameter: body\_size

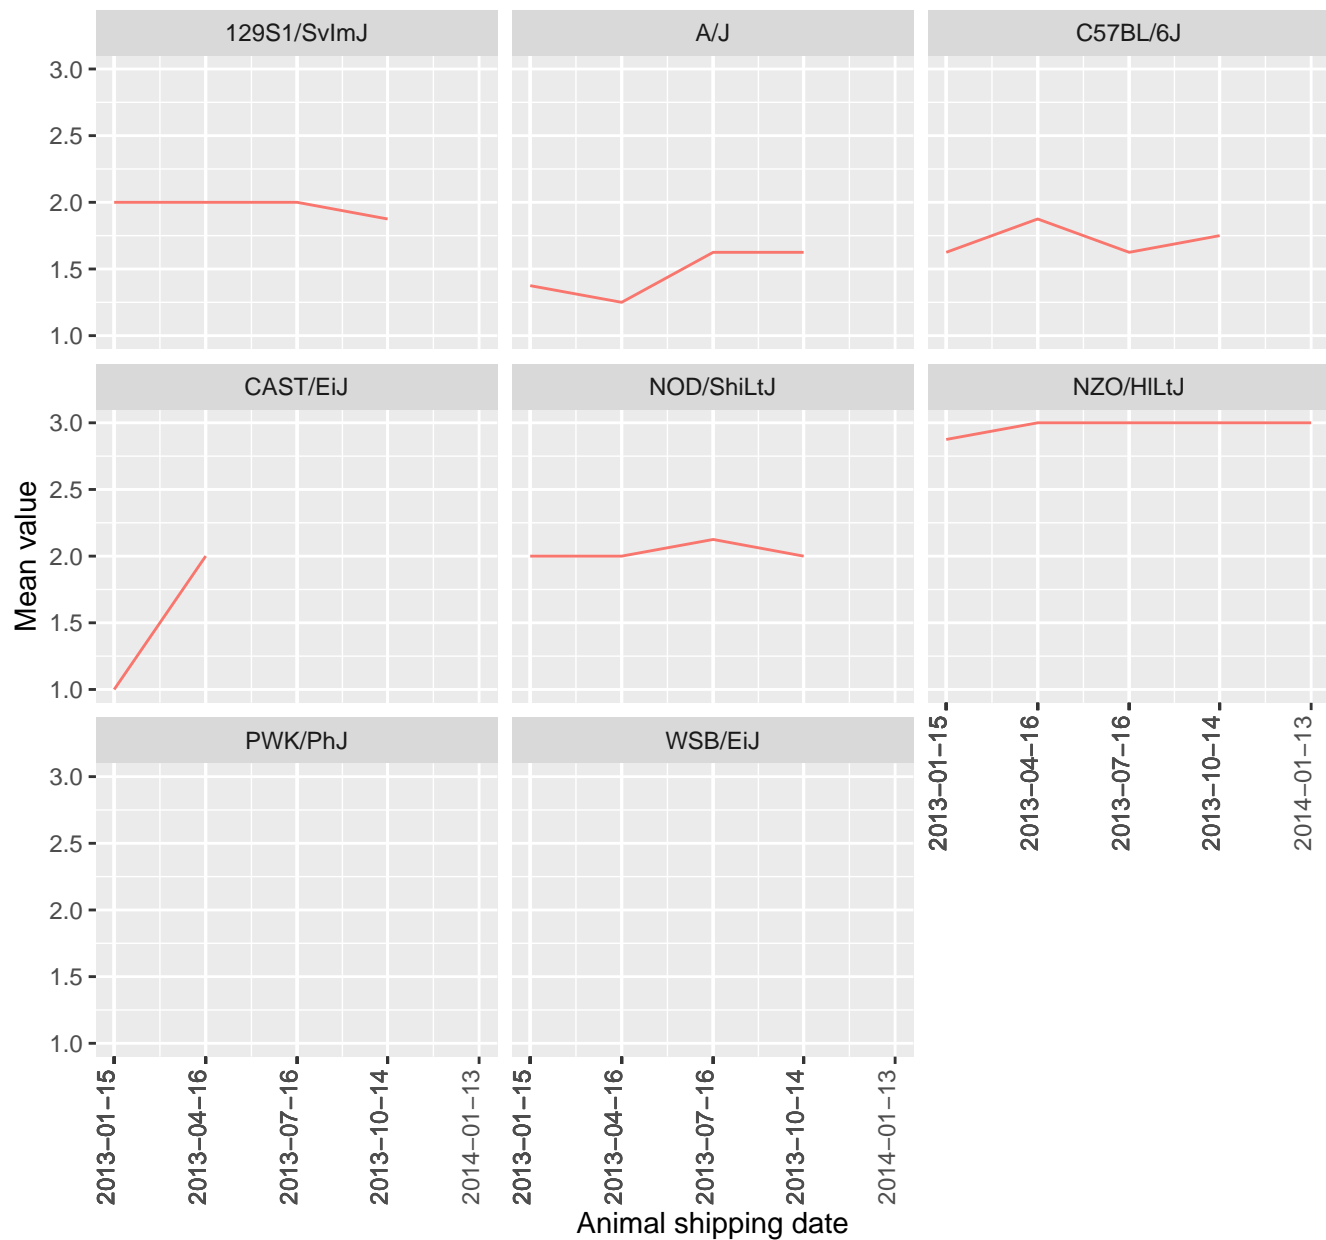

Procedure: GMC18  
Parameter: body\_type

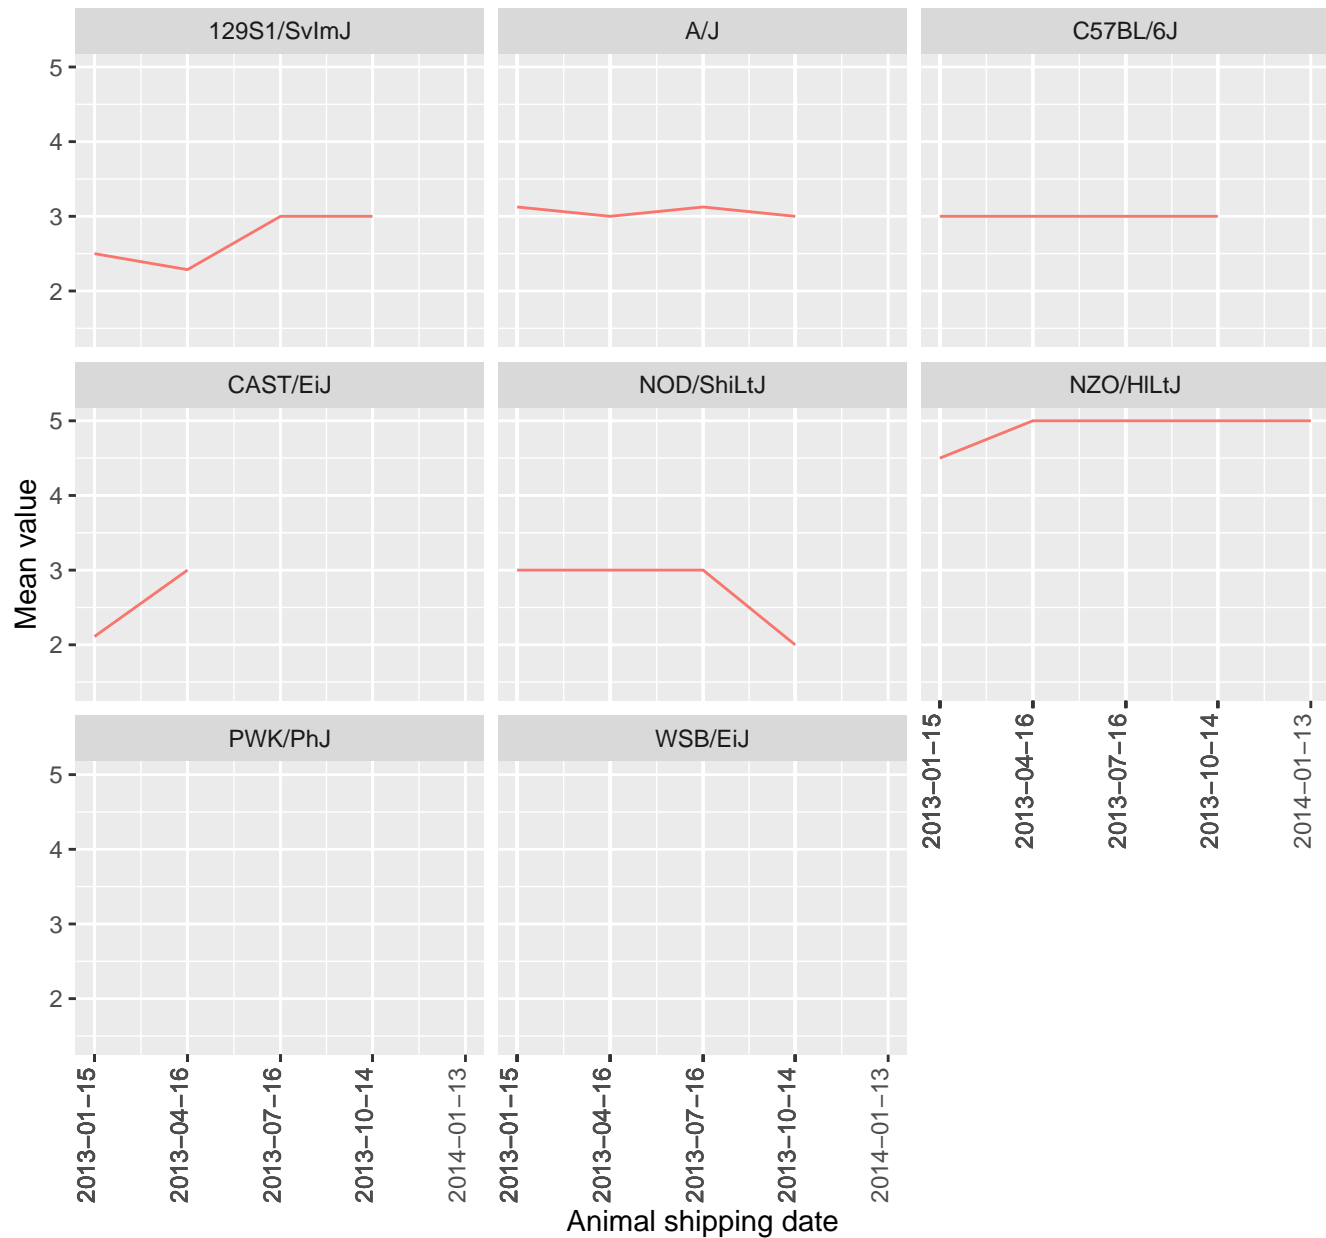

Procedure: GMC18

Parameter: bone\_area\_wholebody

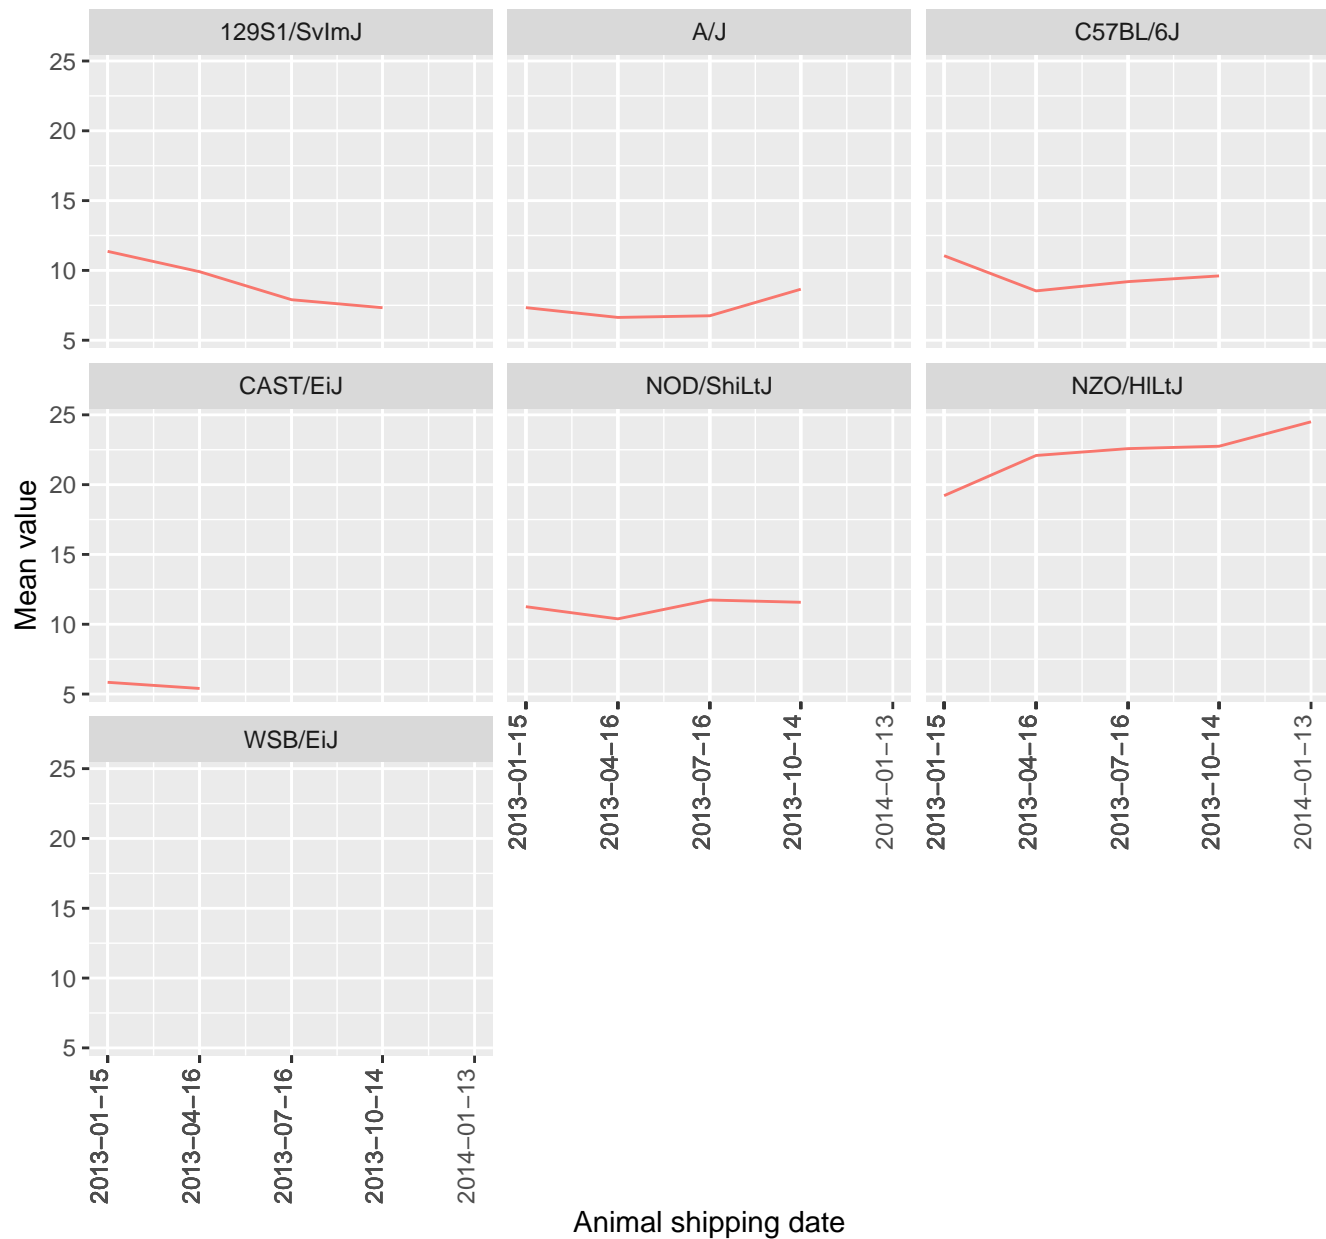

Procedure: GMC18  
Parameter: bone\_area\_Xhead

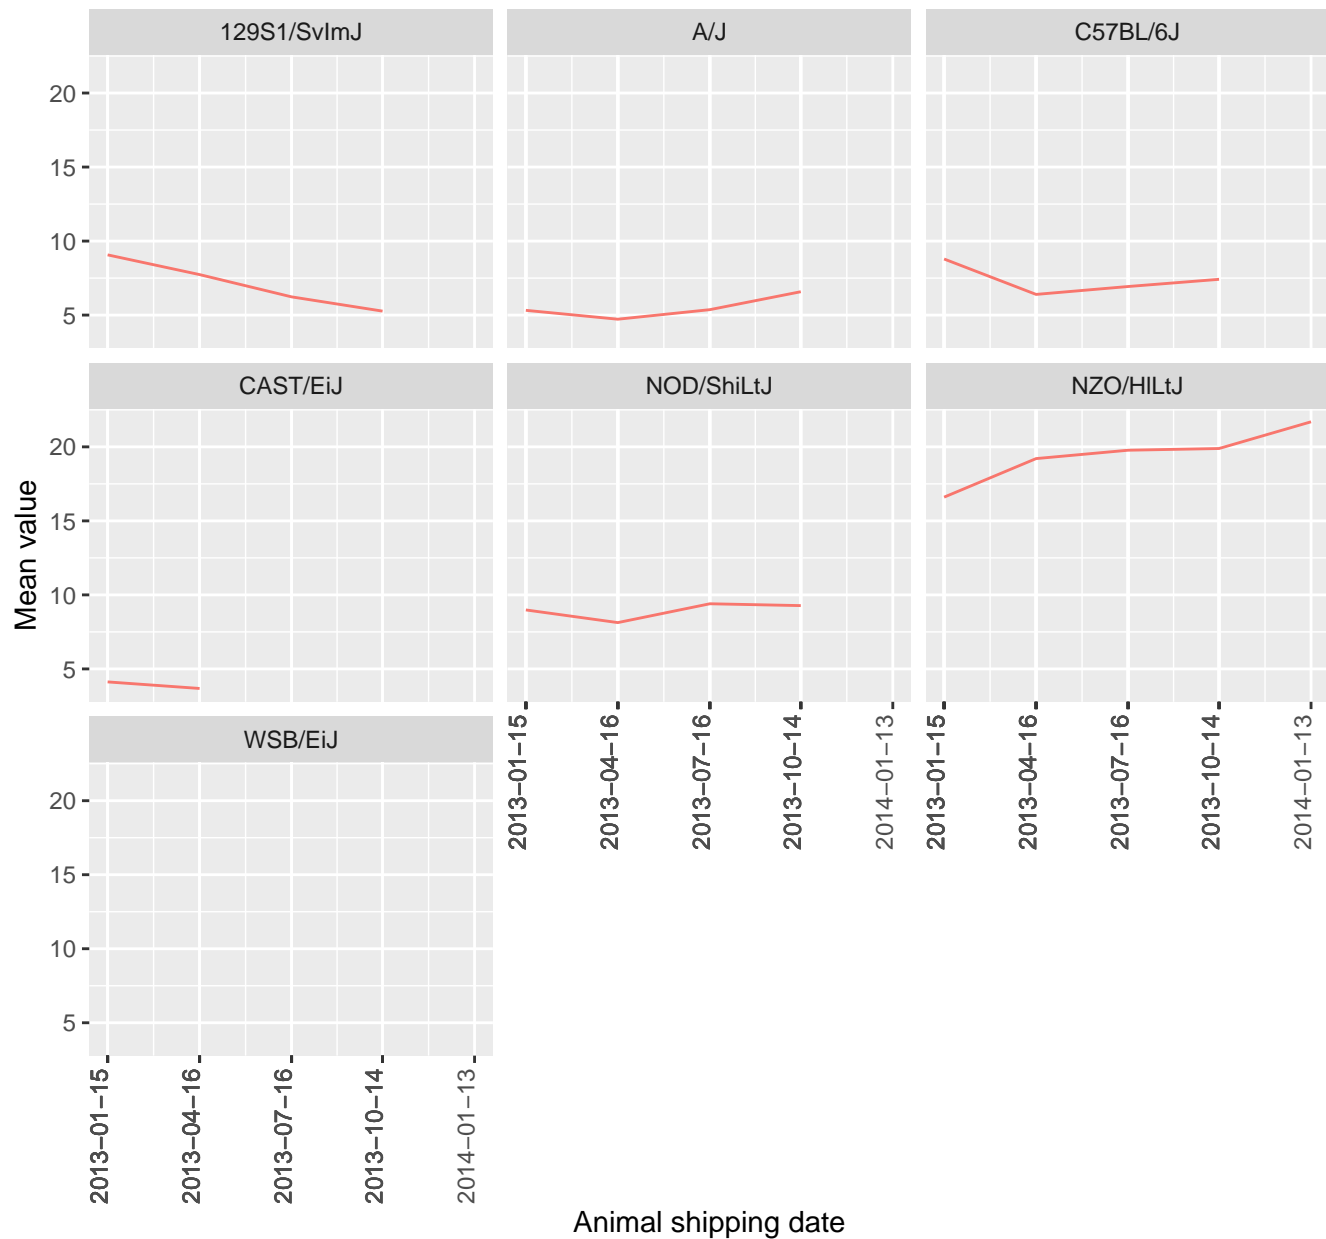

Procedure: GMC18

Parameter: bone\_mass\_wholebody

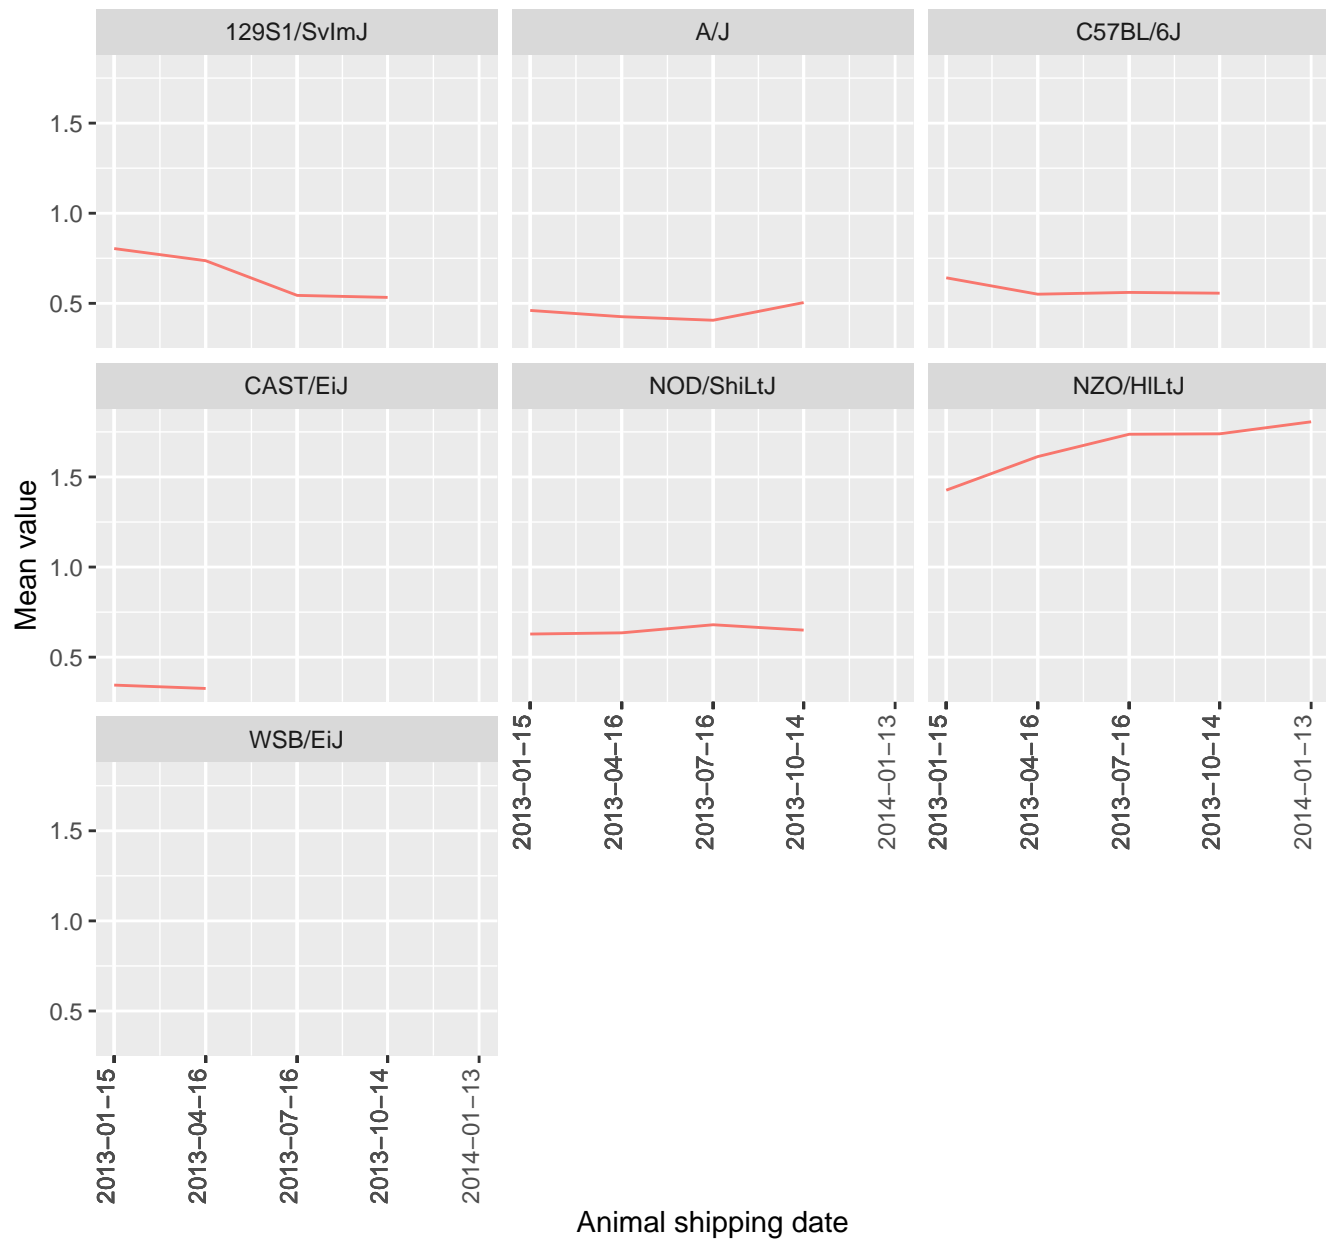

Procedure: GMC18

Parameter: bone\_mass\_Xhead

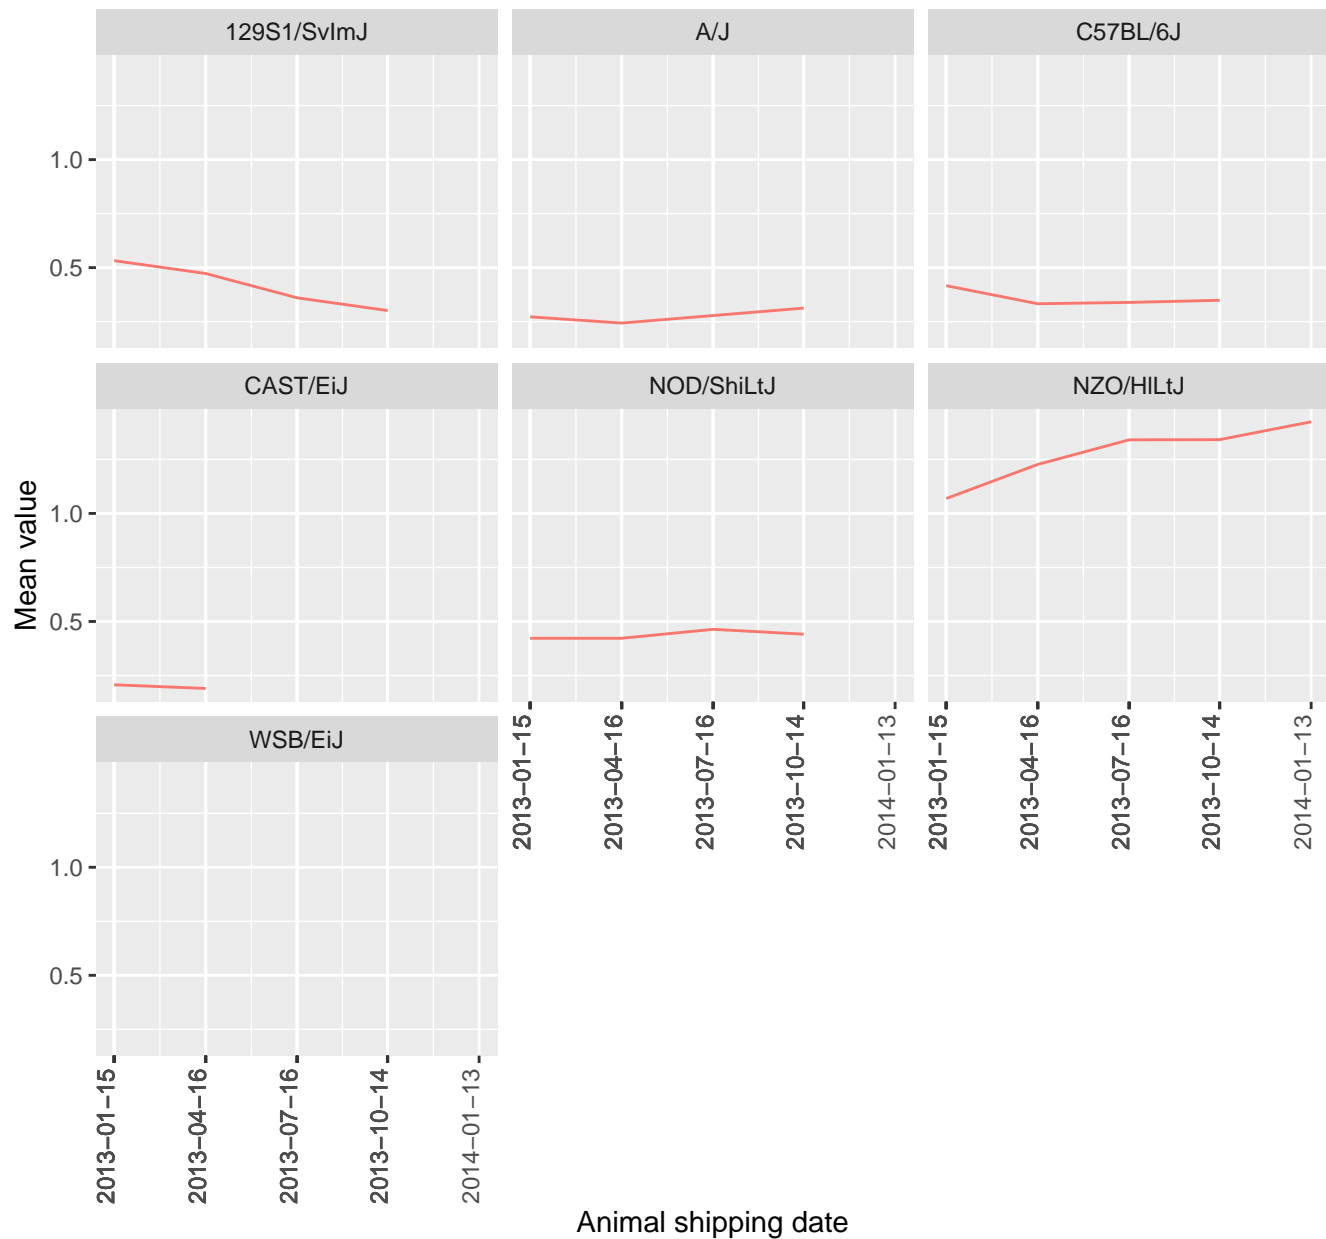

Procedure: GMC18

Parameter: FATmass\_wholebody

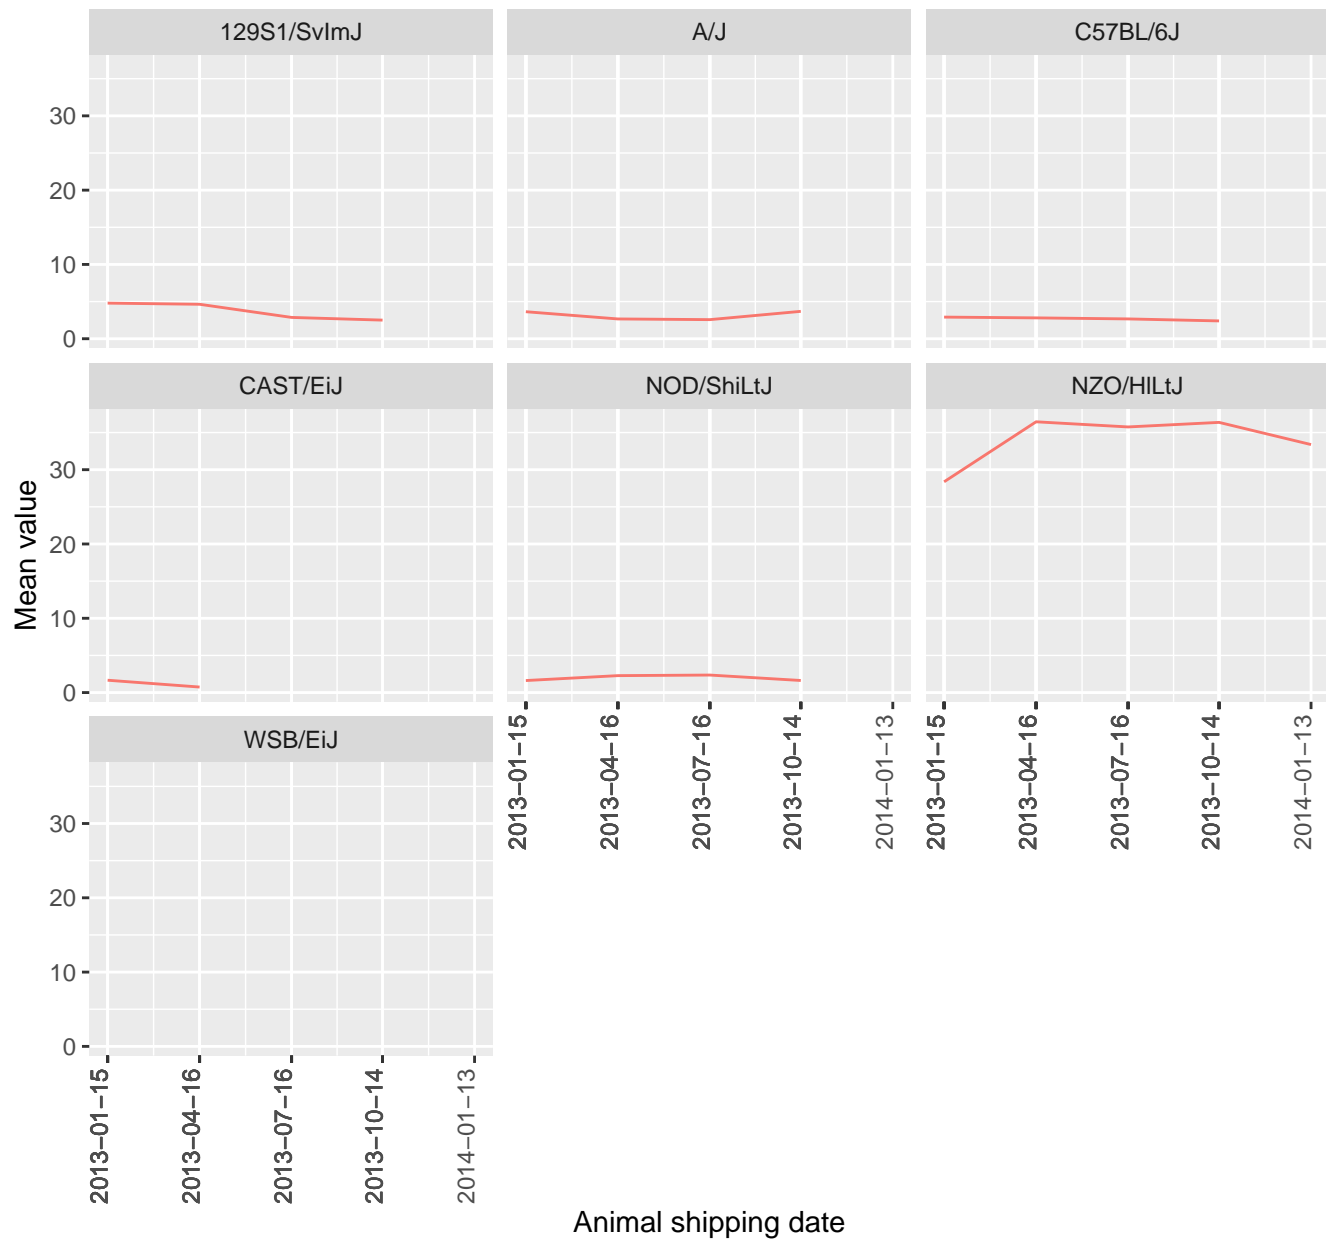

Procedure: GMC18  
Parameter: FATmass\_Xhead

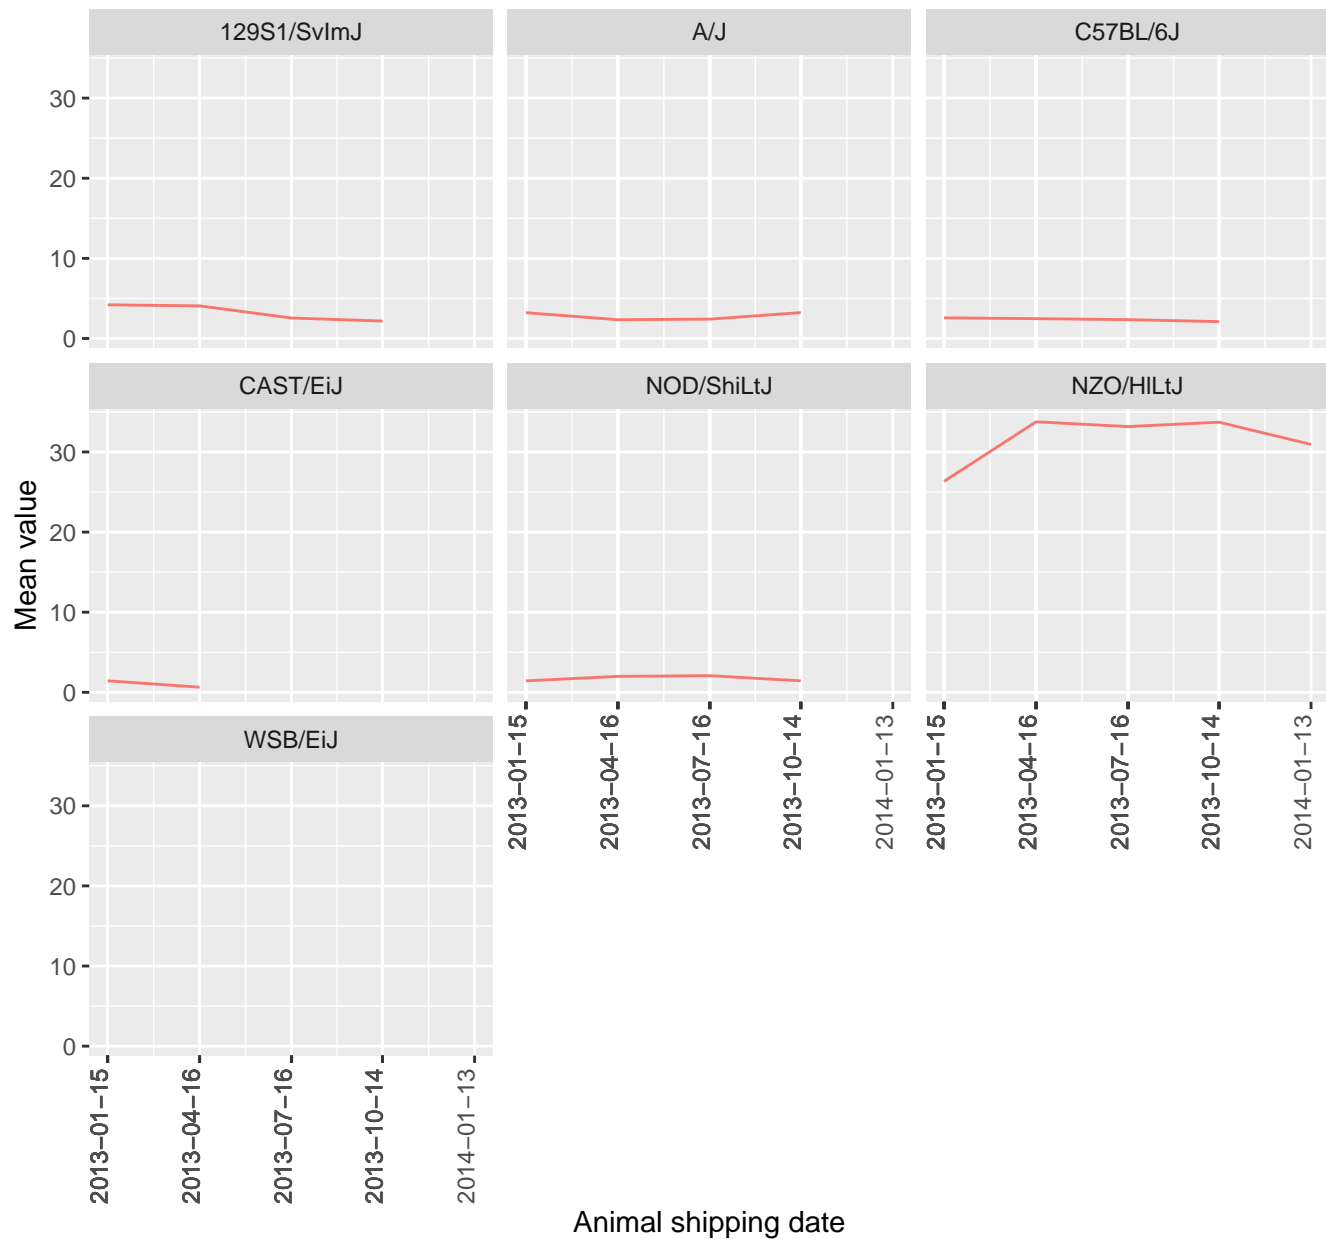



Procedure: GMC18

Parameter: LEANmass\_wholebody

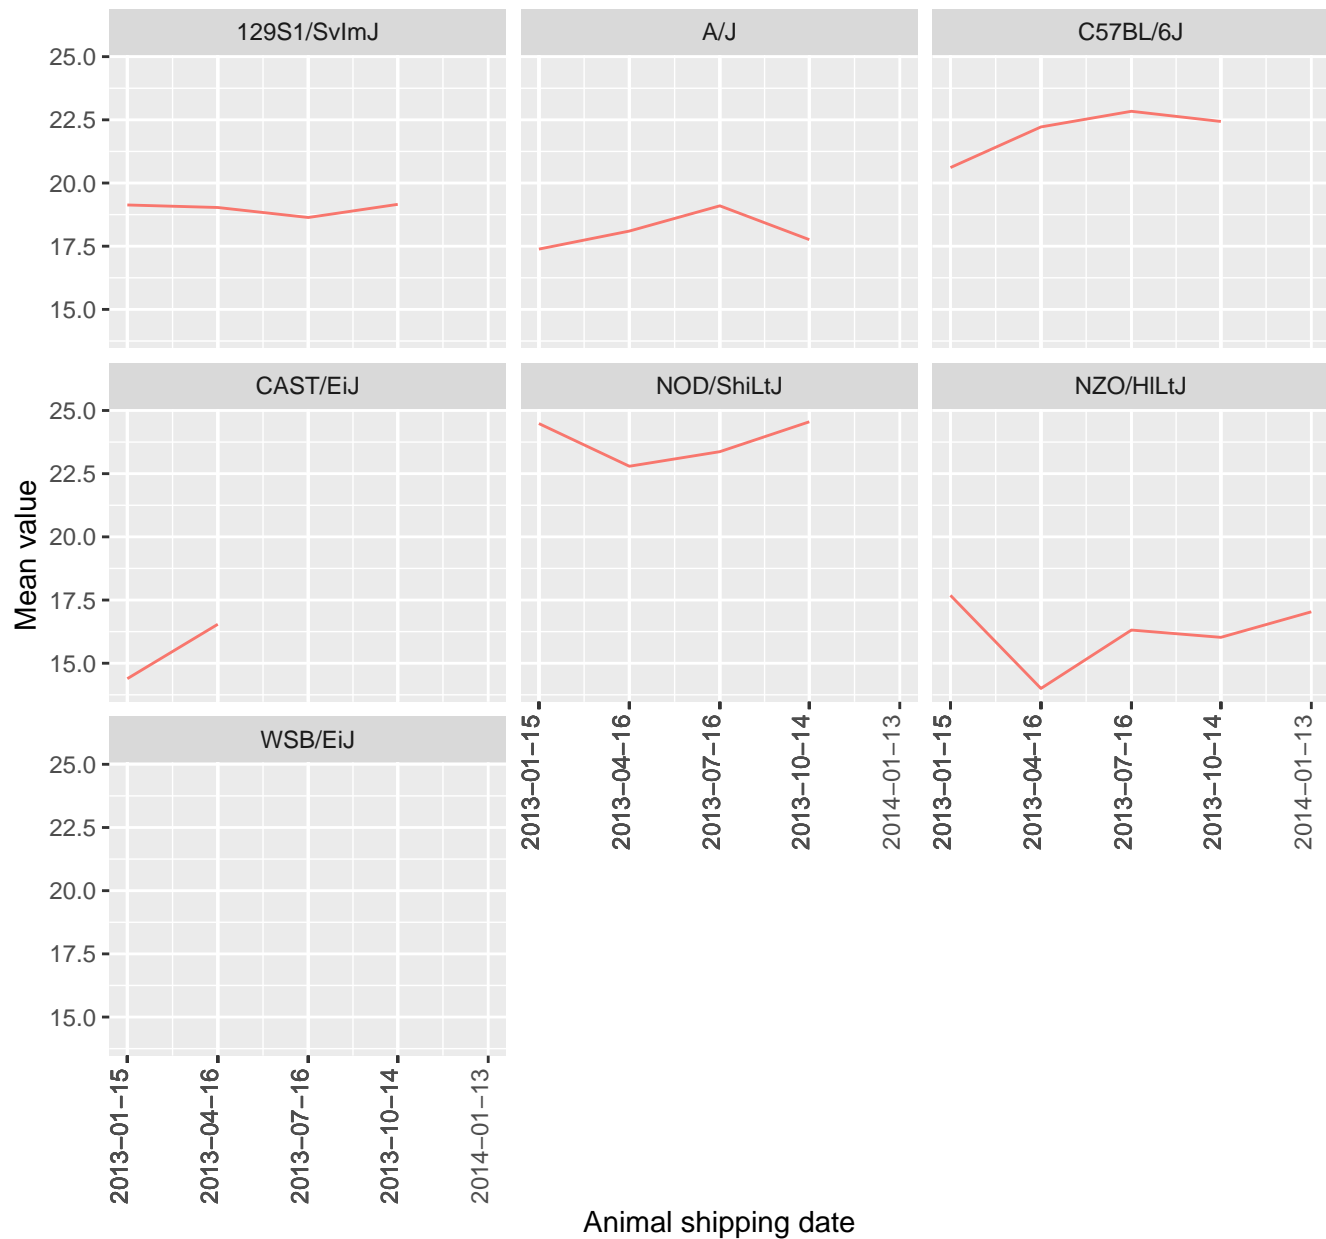

Procedure: GMC18

Parameter: LEANmass\_Xhead

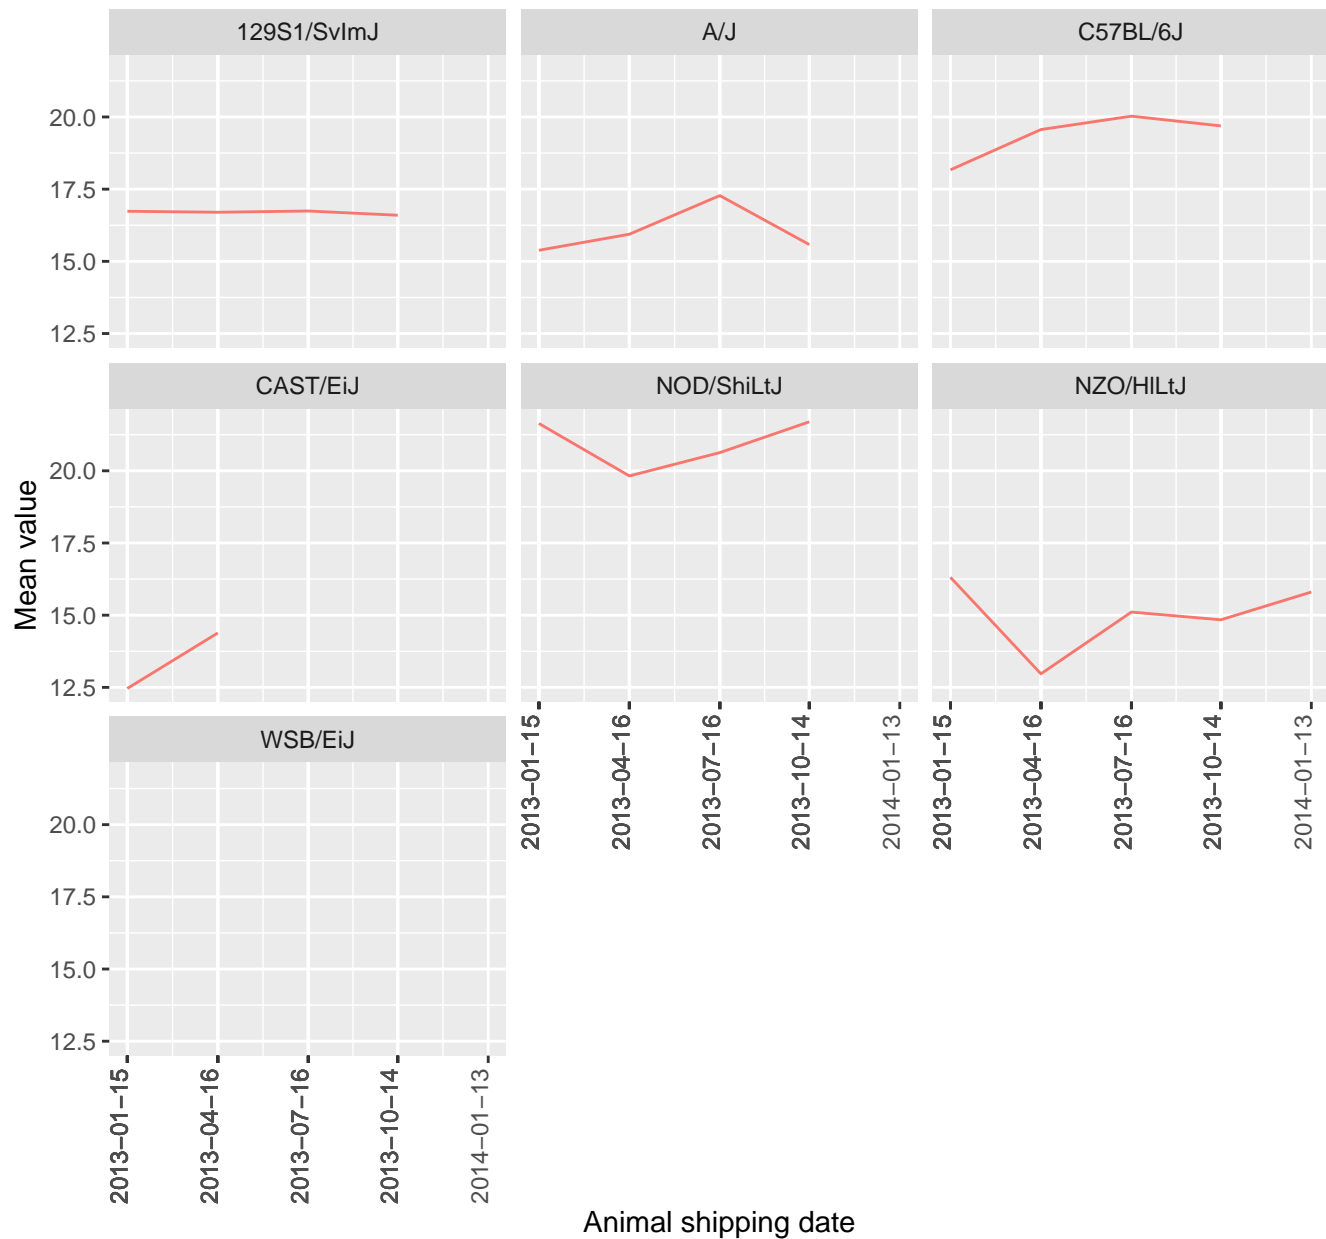

Procedure: GMC18  
Parameter: lumbar\_num

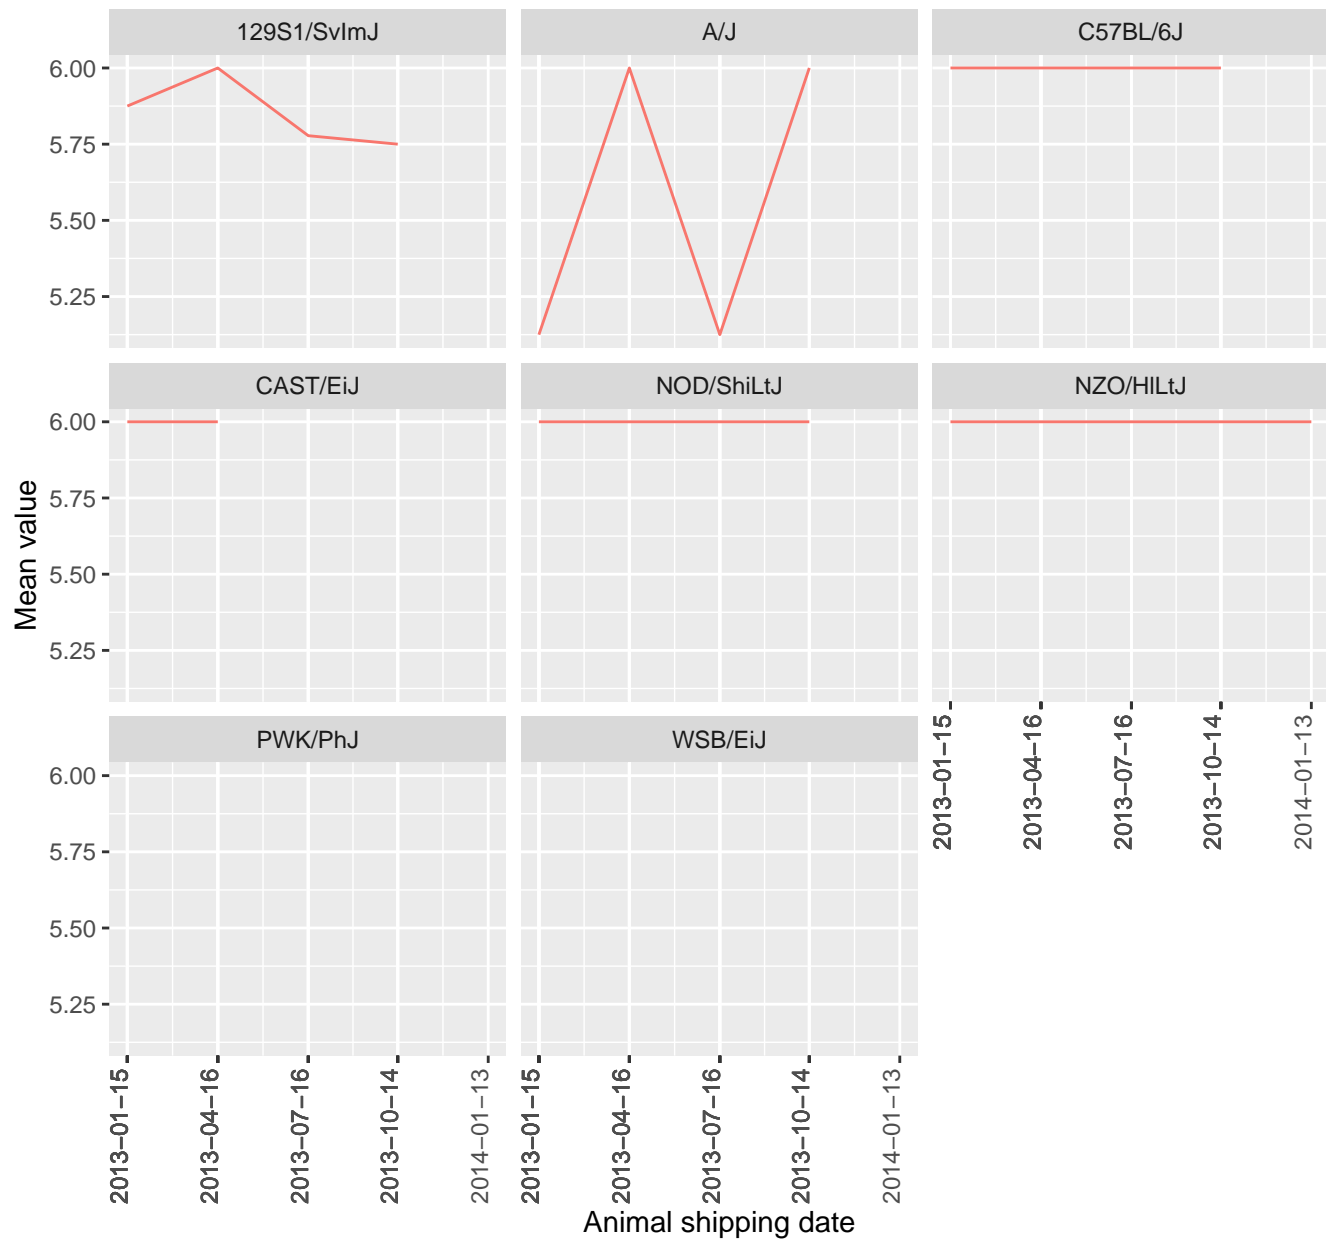

Procedure: GMC18

Parameter: SOFTmass\_wholebody

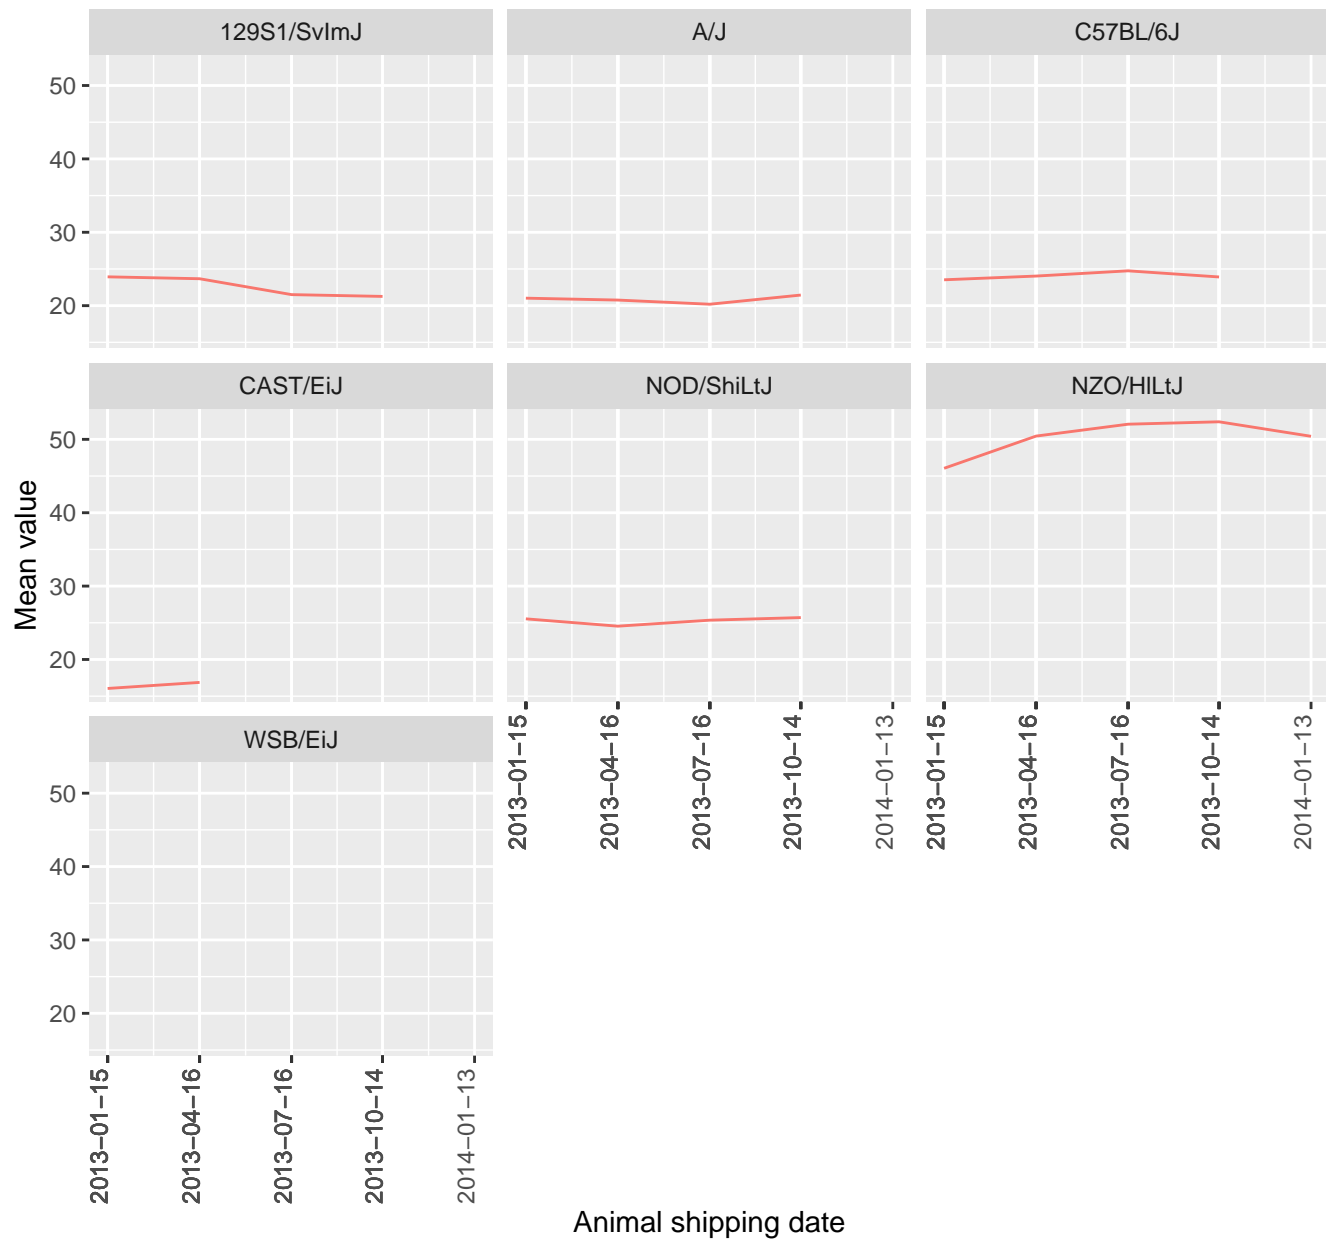

Procedure: GMC18

Parameter: SOFTmass\_Xhead

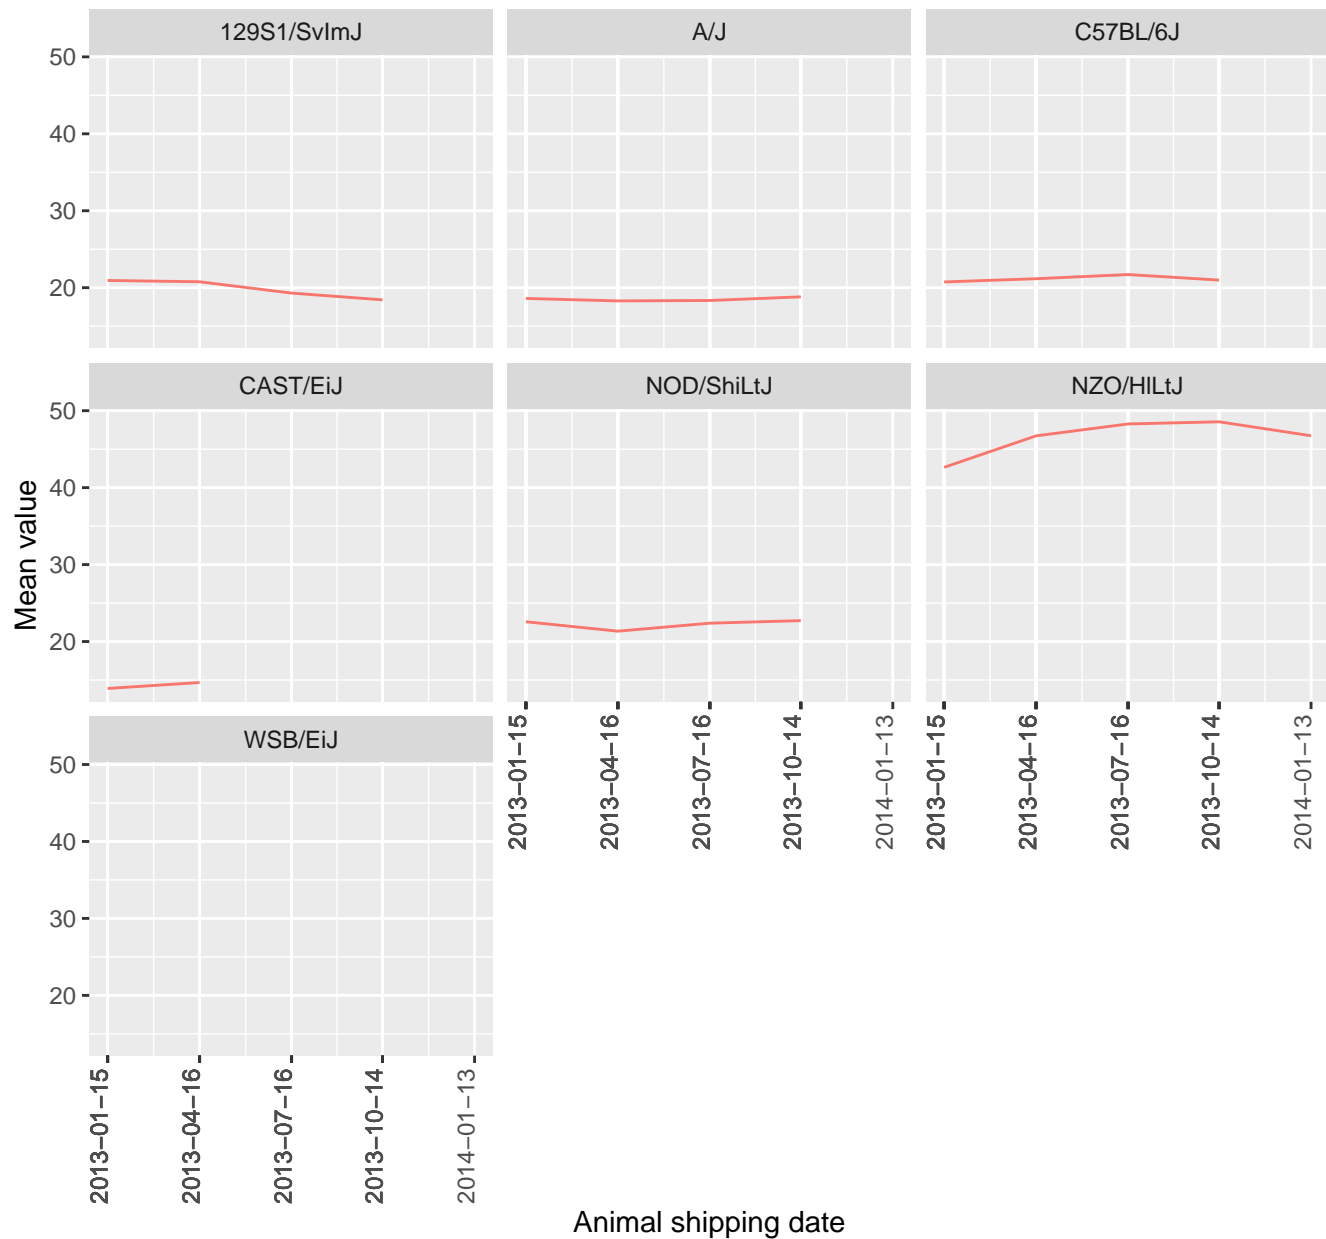

Procedure: GMC20  
Parameter: aDNA\_17

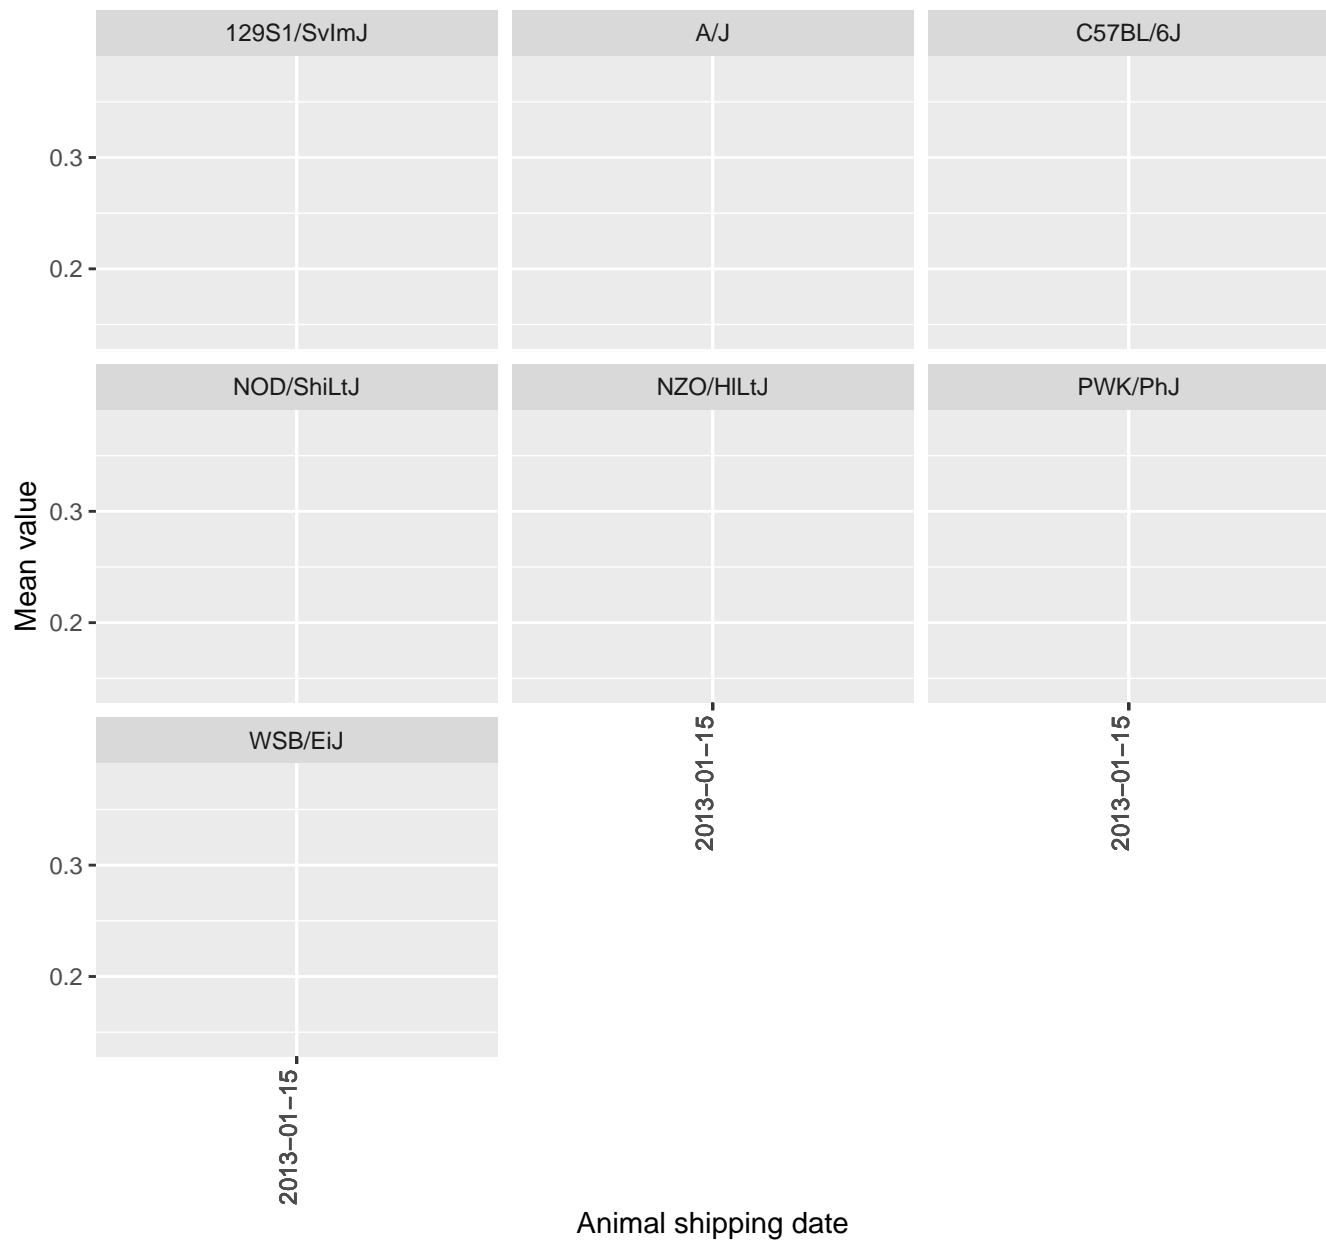

Procedure: GMC20  
Parameter: aDNA\_21

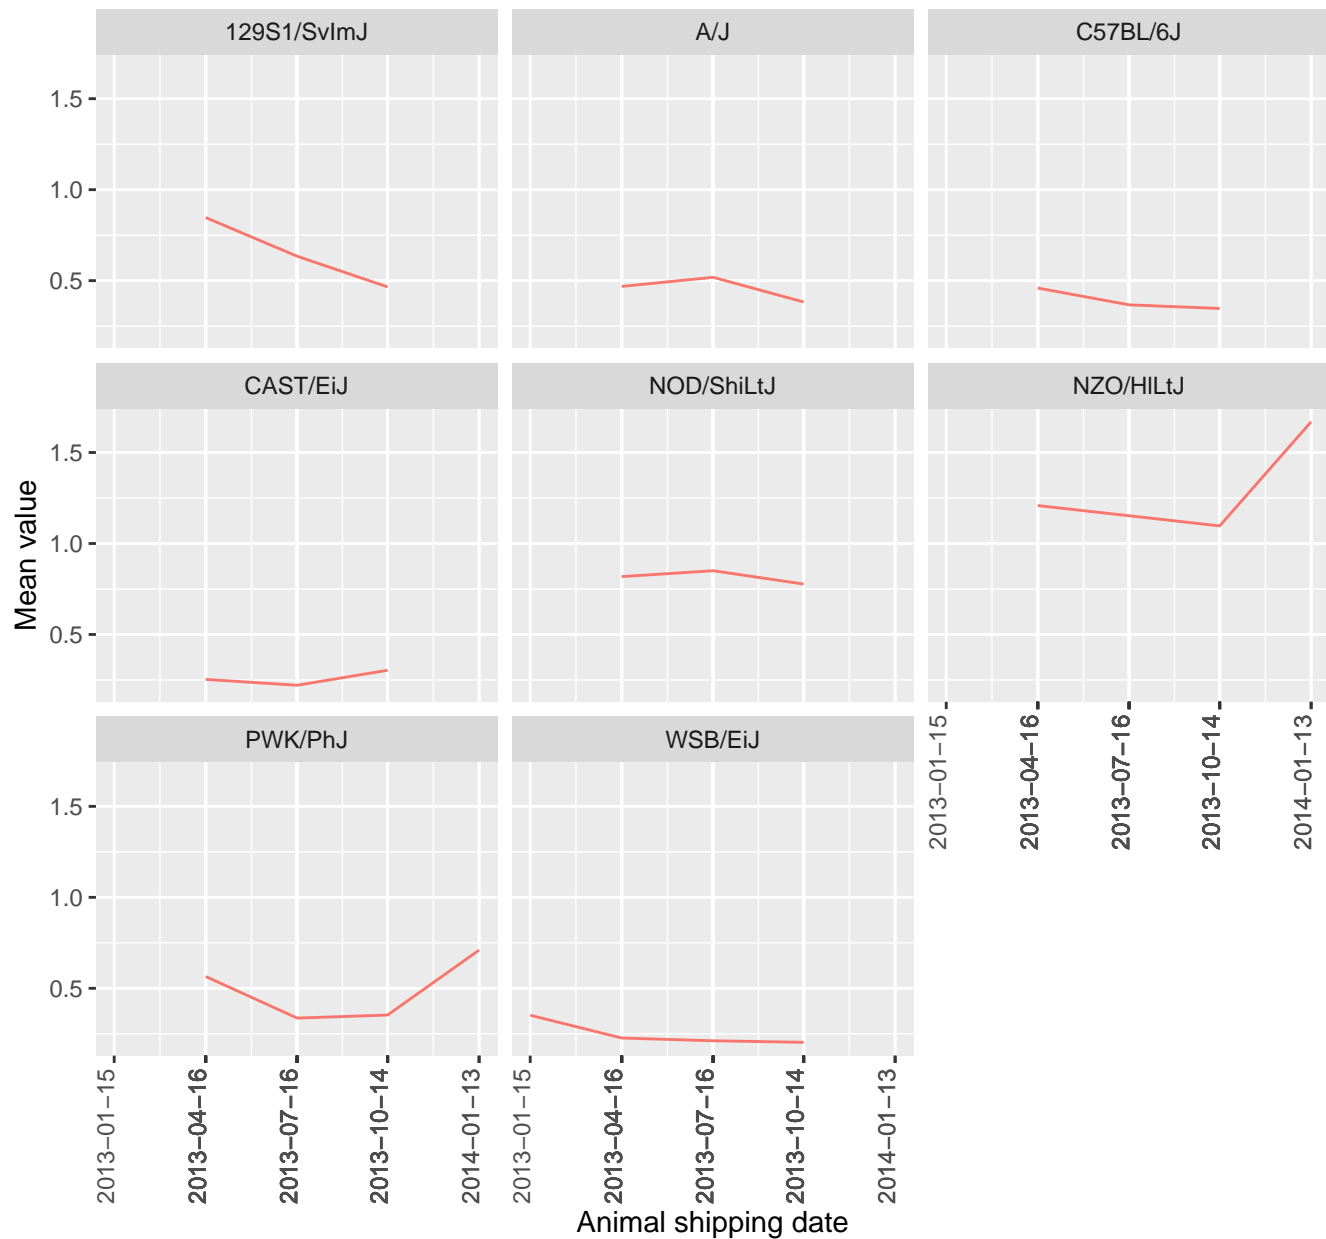

Procedure: GMC20

Parameter: IgA\_17

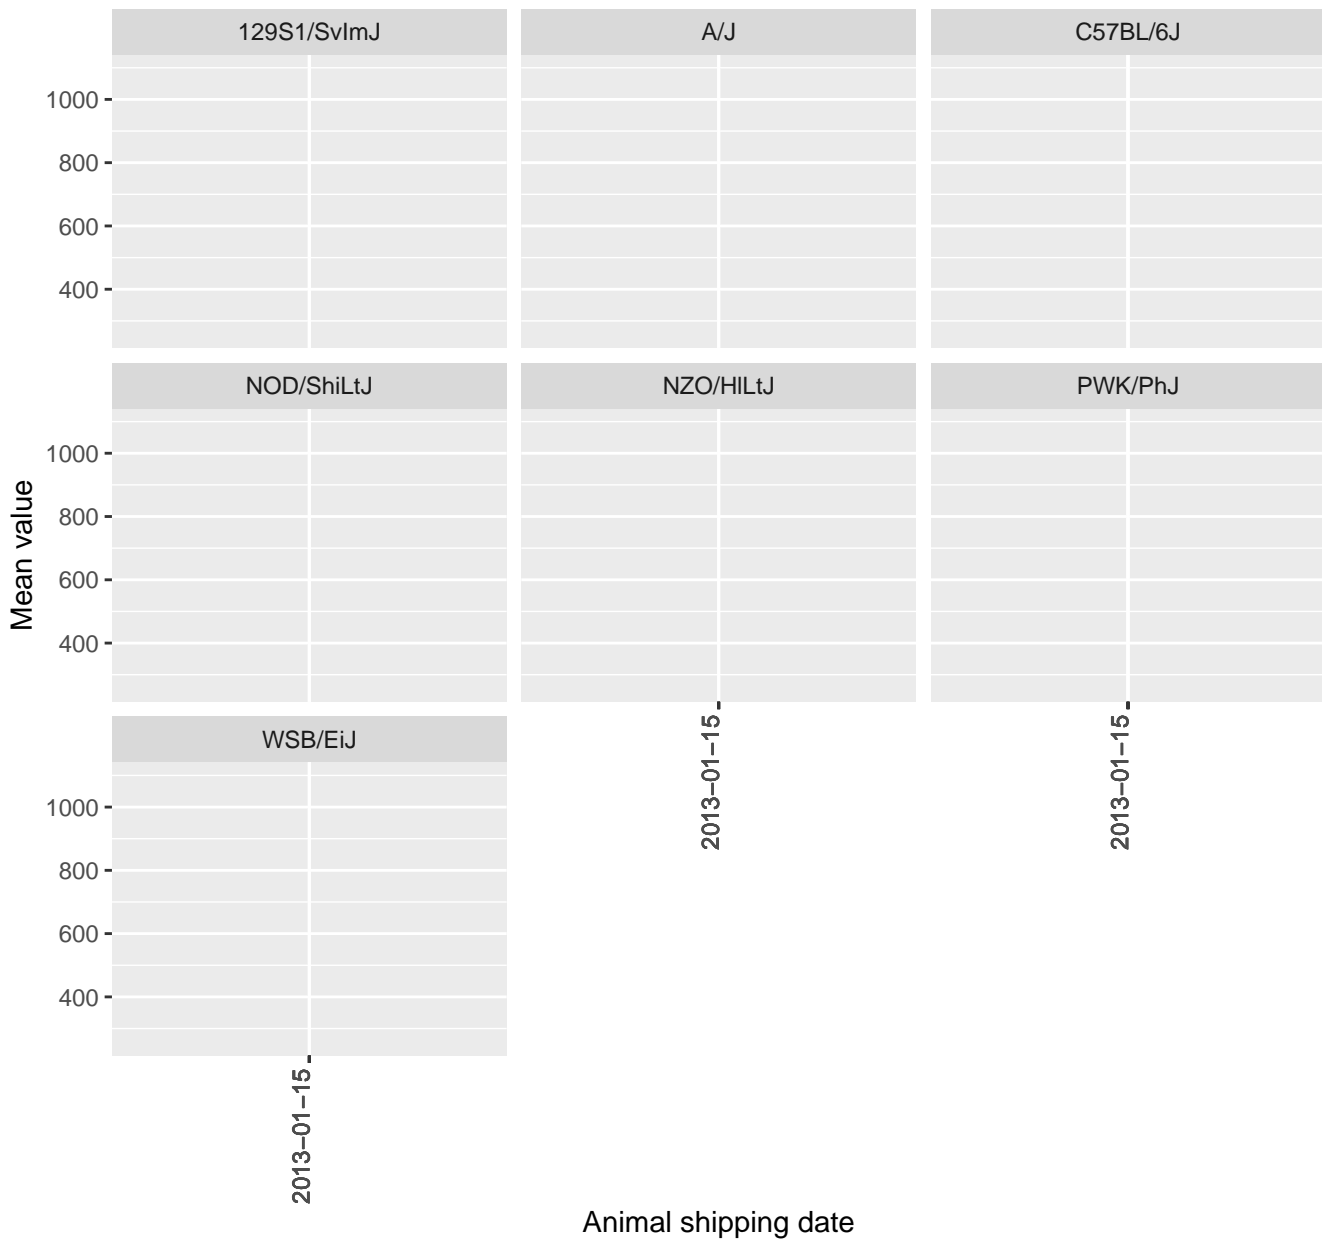



Procedure: GMC20

Parameter: IgA\_21

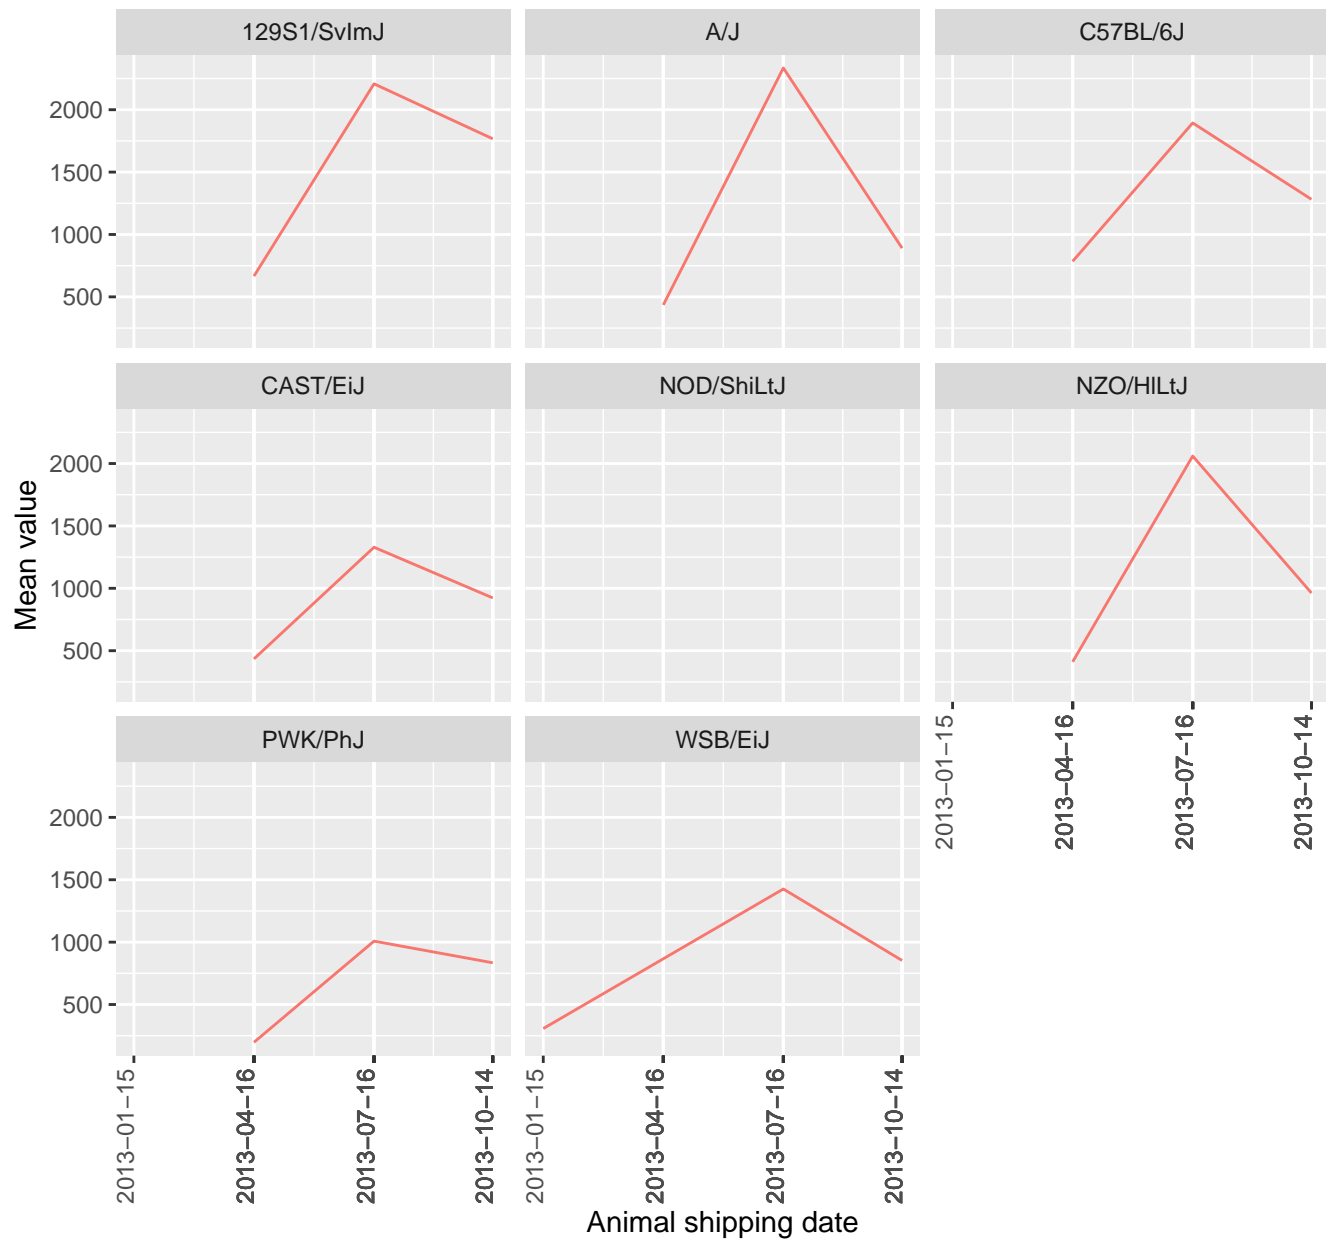

Procedure: GMC20

Parameter: IgE\_17

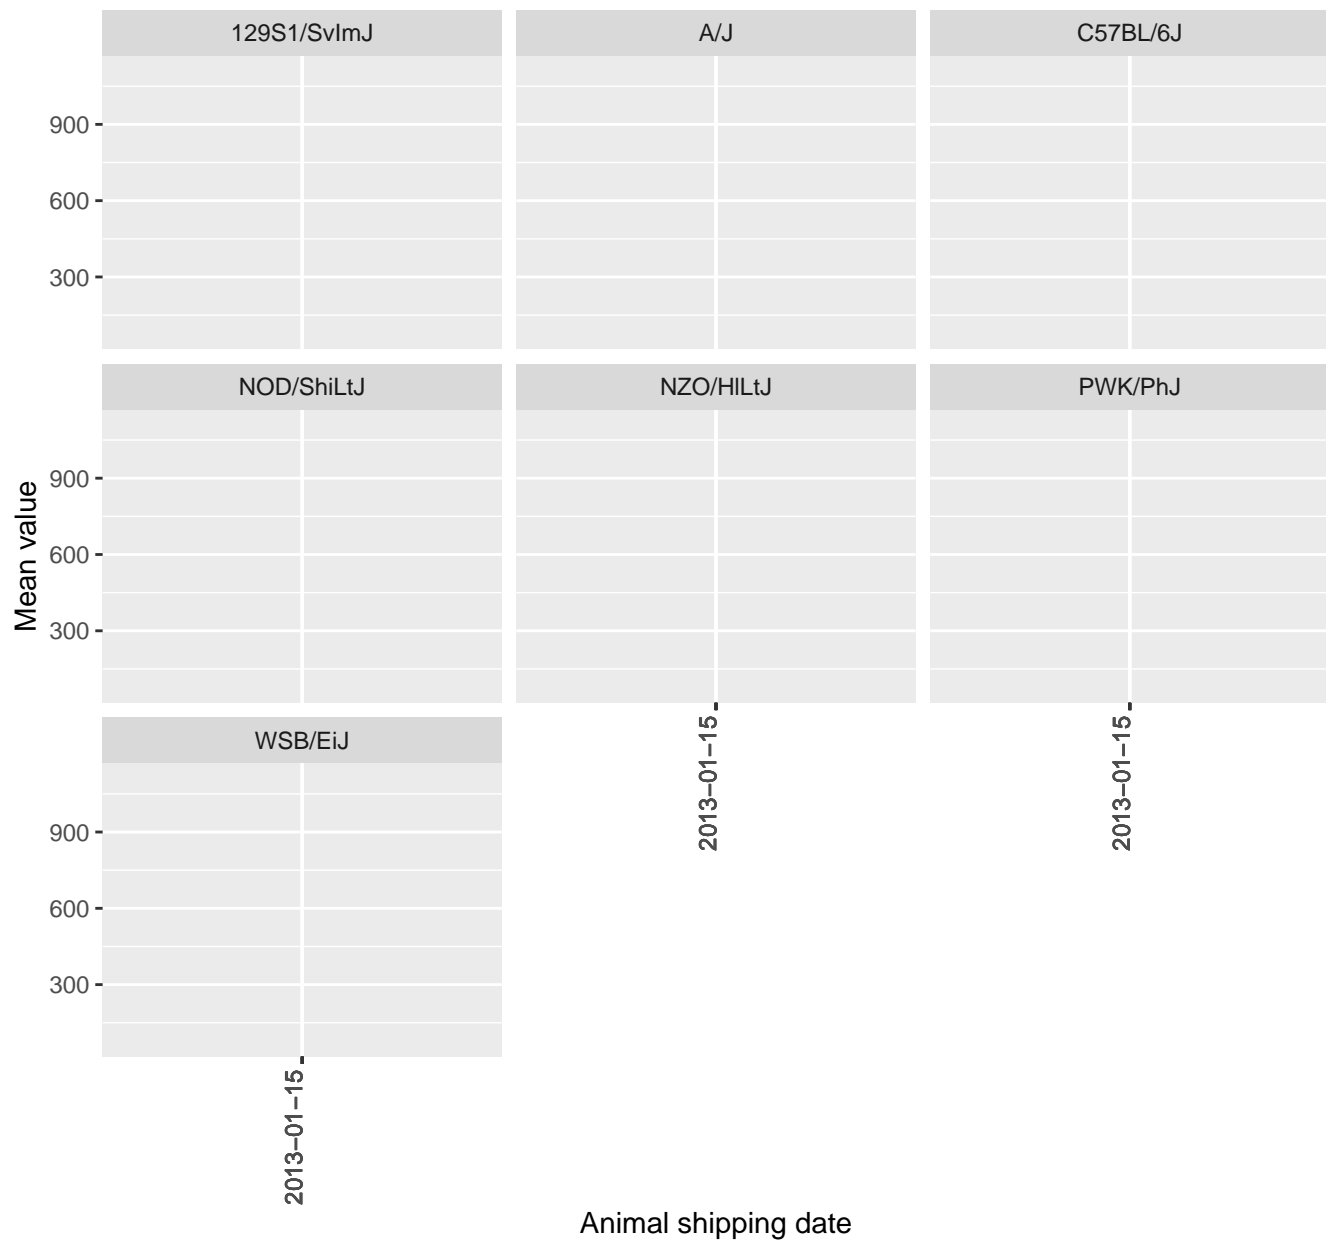

Procedure: GMC20

Parameter: IgE\_21

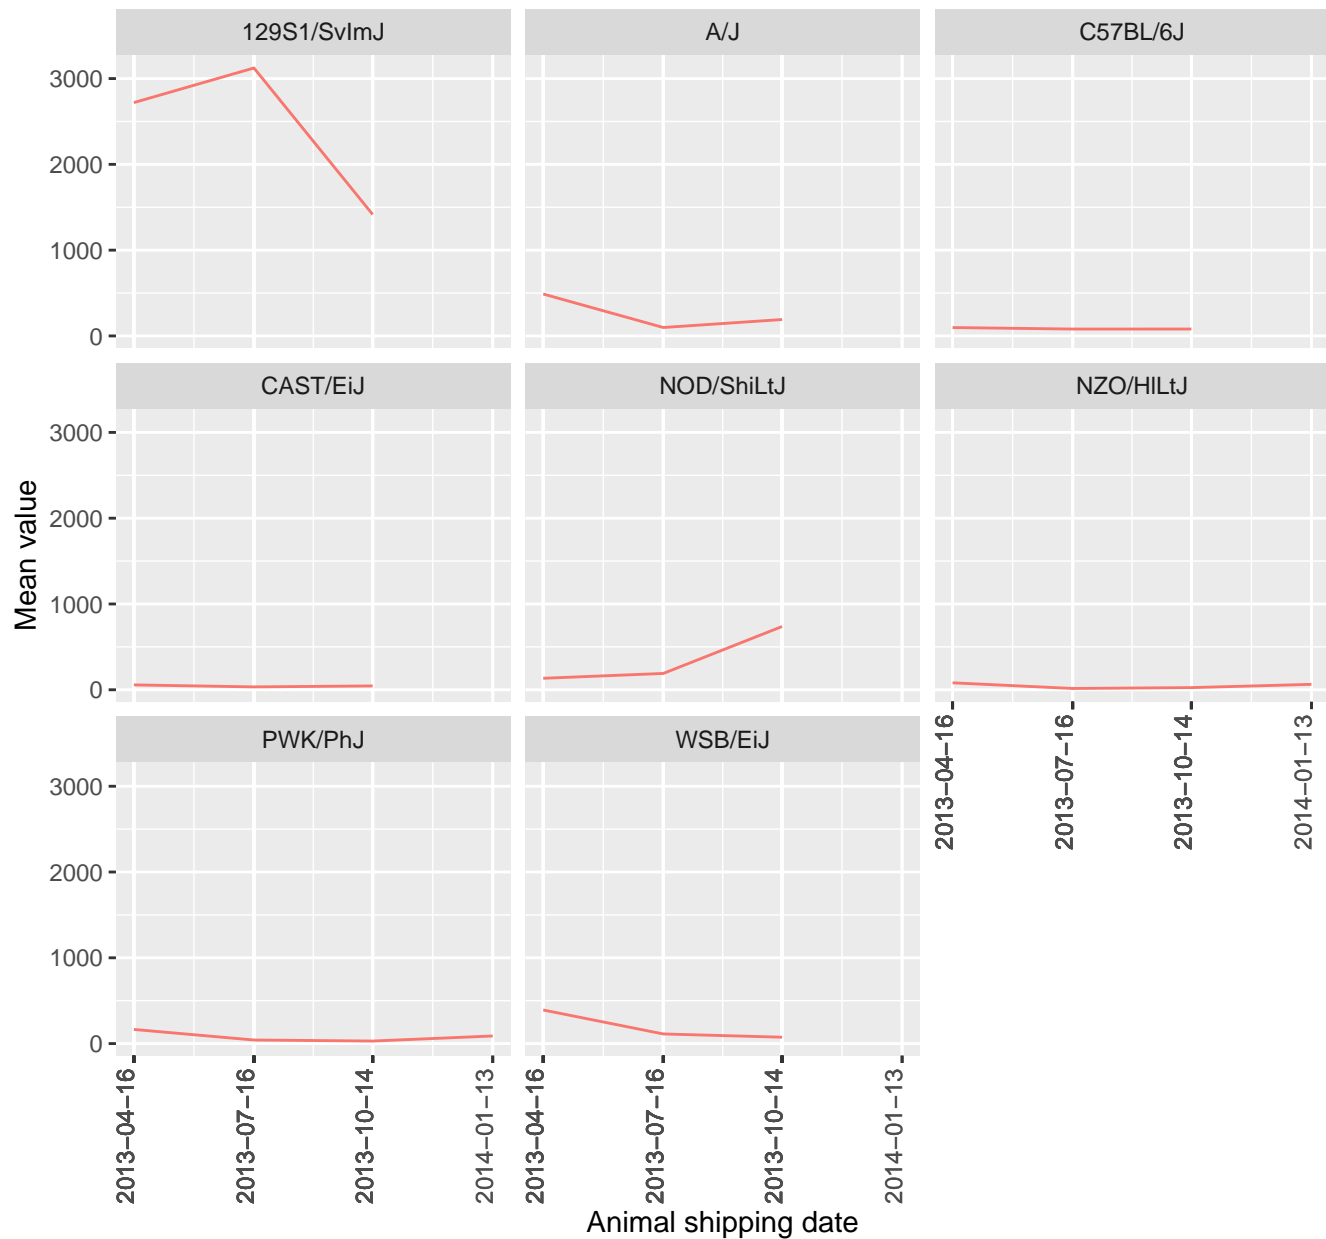

Procedure: GMC20  
Parameter: IgG1\_21

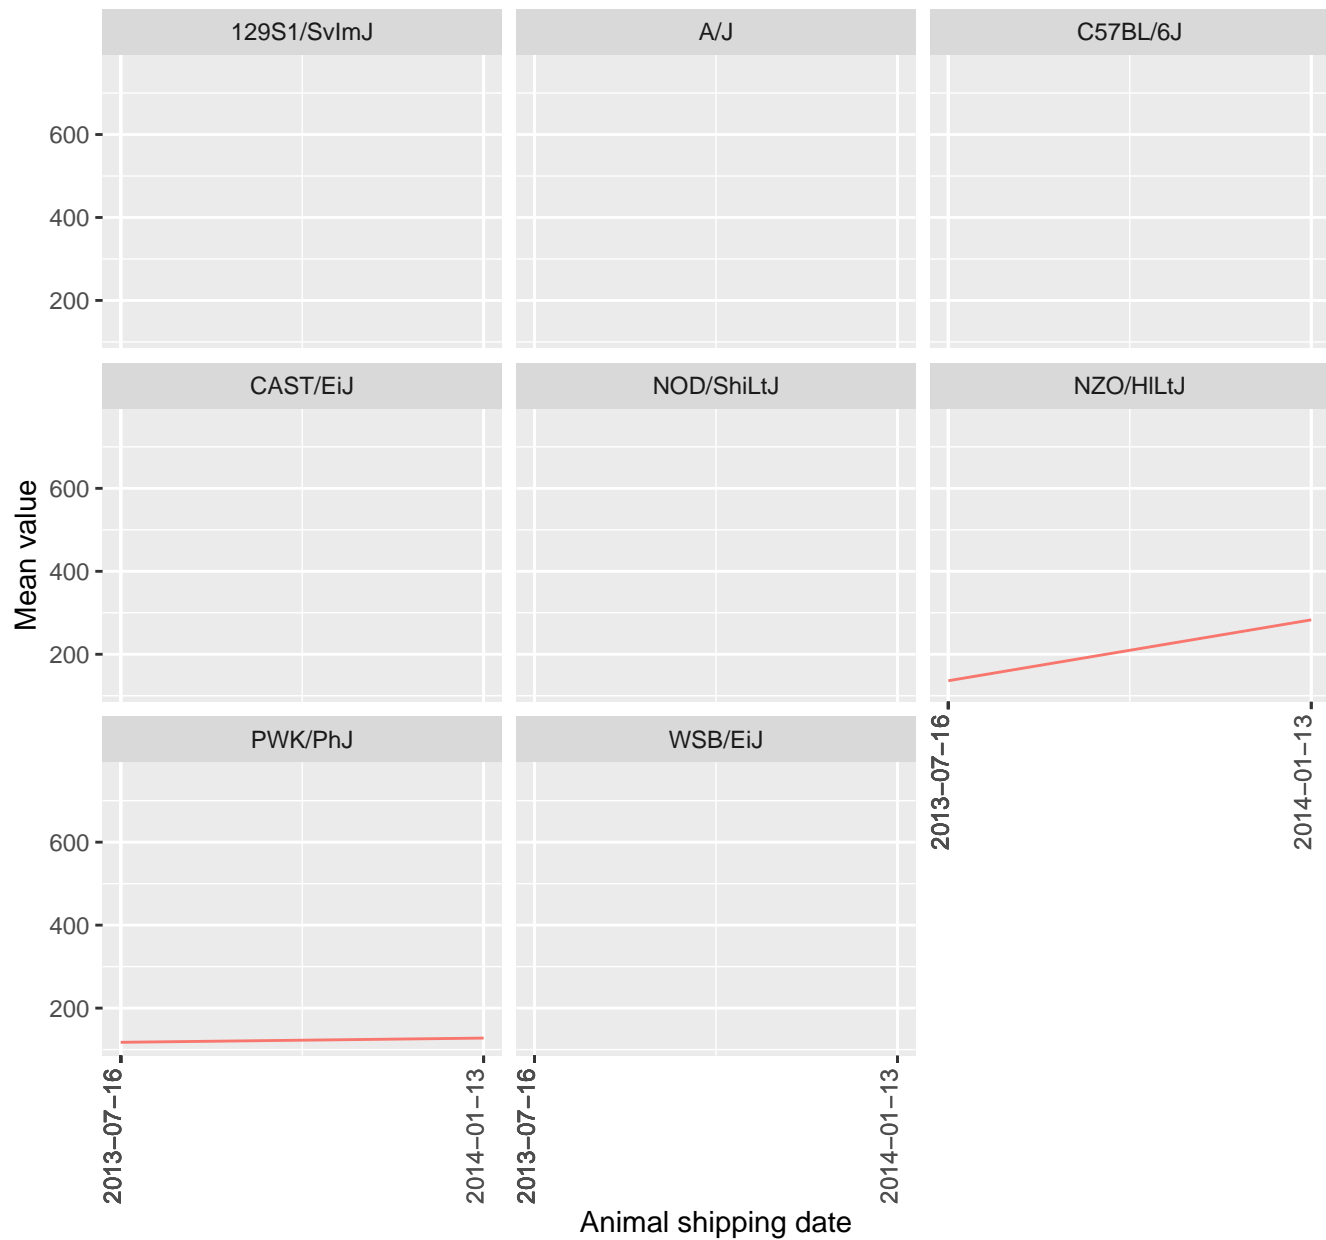

Procedure: GMC20  
Parameter: IgG2a\_17

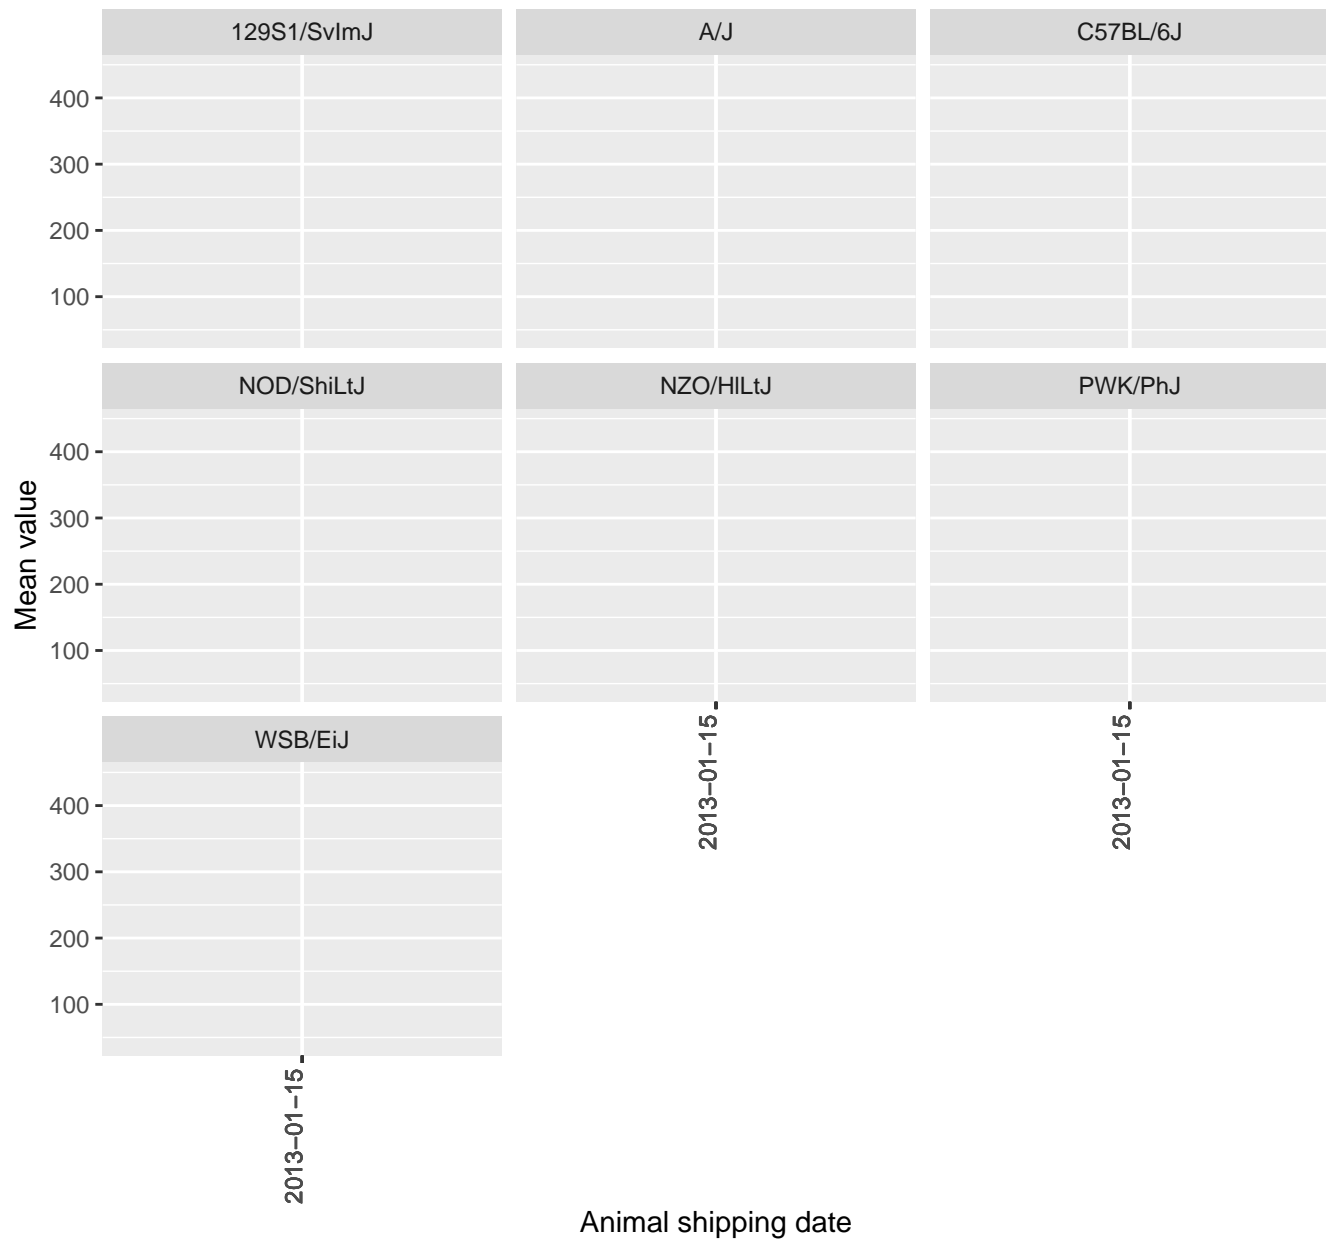

Procedure: GMC20  
Parameter: IgG2a\_21

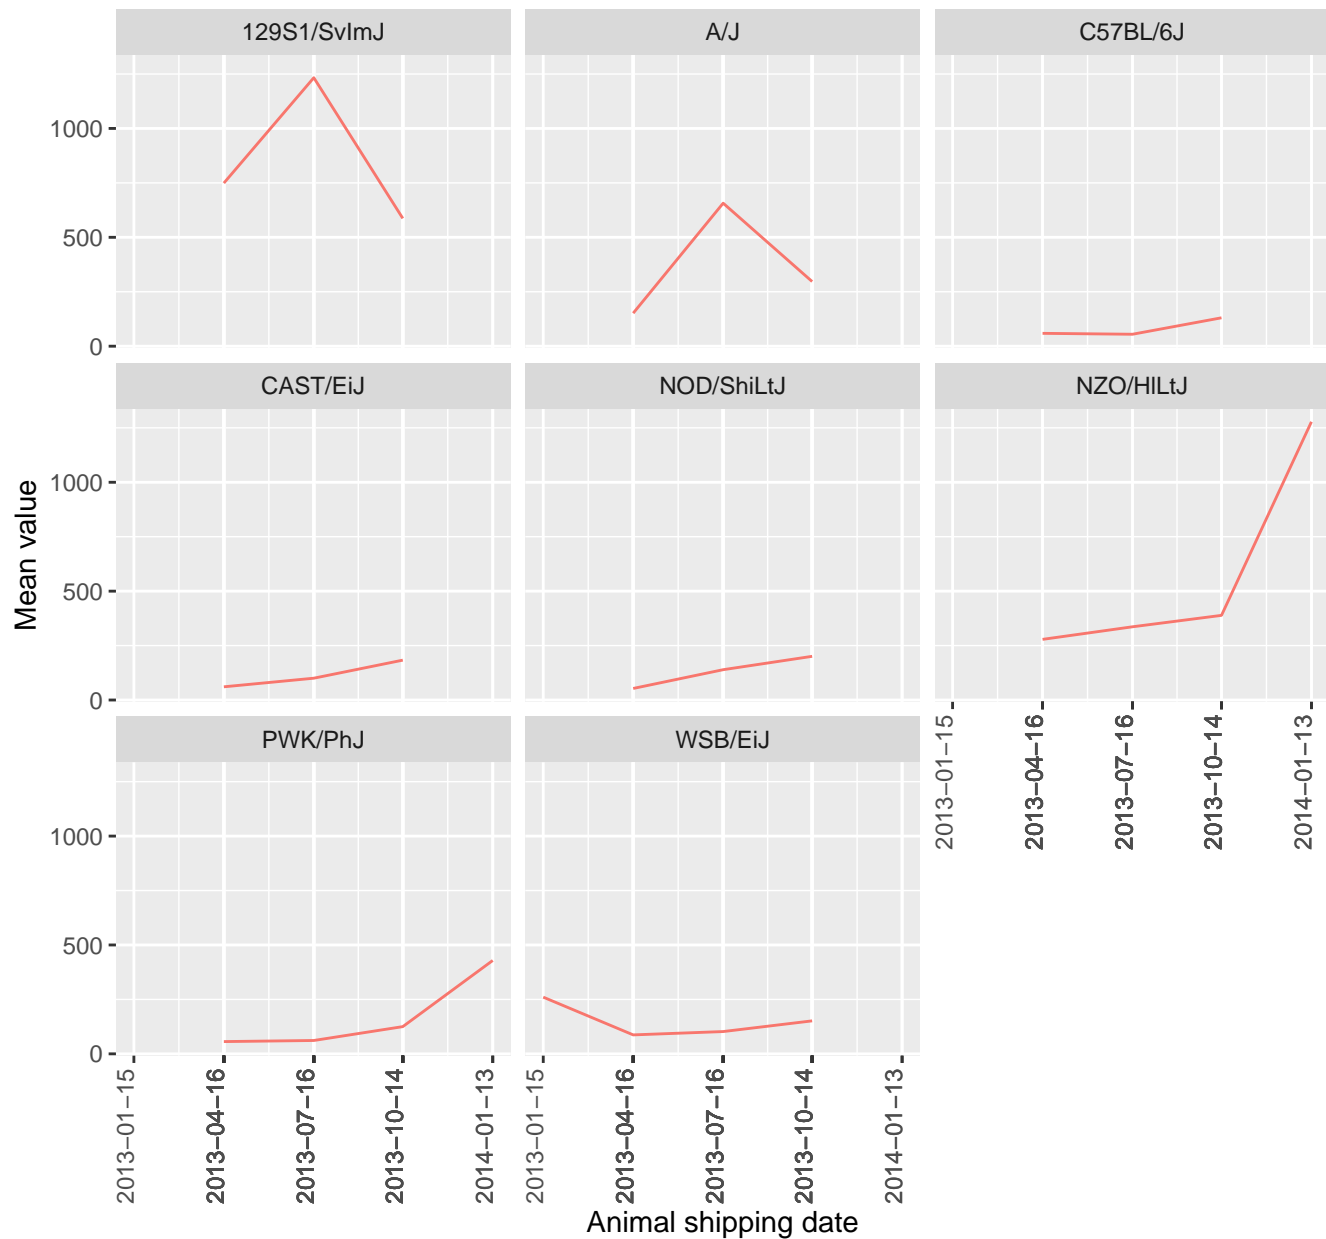

Procedure: GMC20  
Parameter: IgG2b\_21

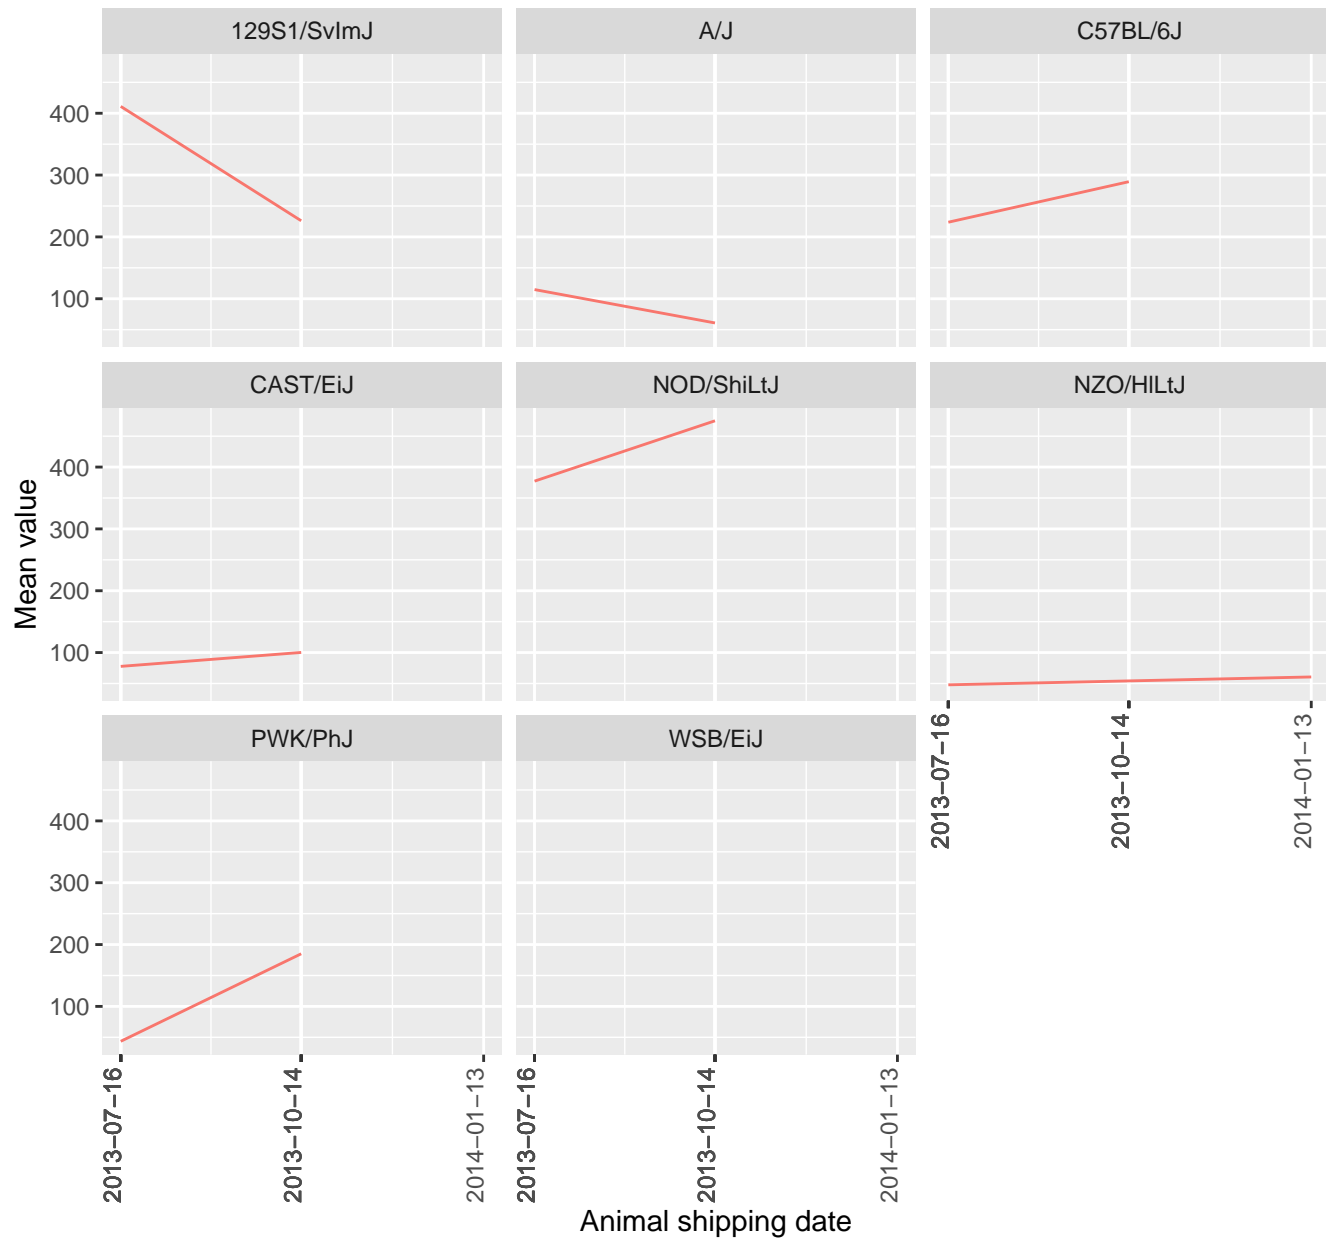

Procedure: GMC20  
Parameter: IgG3\_21

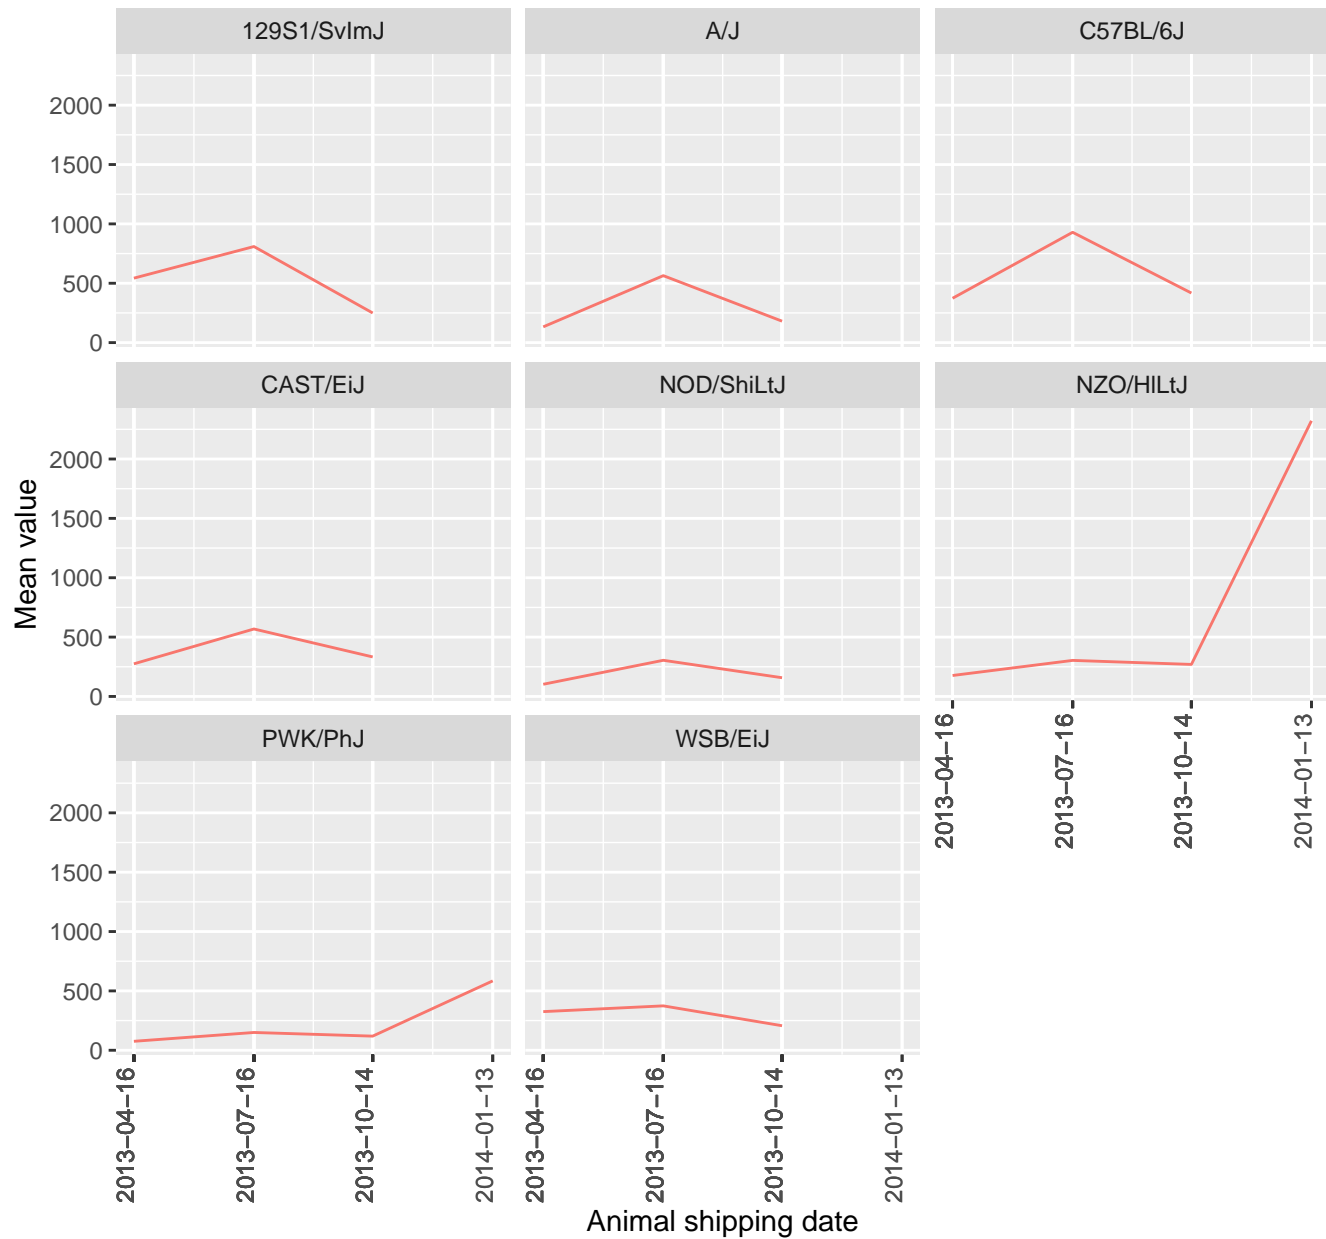



Procedure: GMC20  
Parameter: IgM\_17

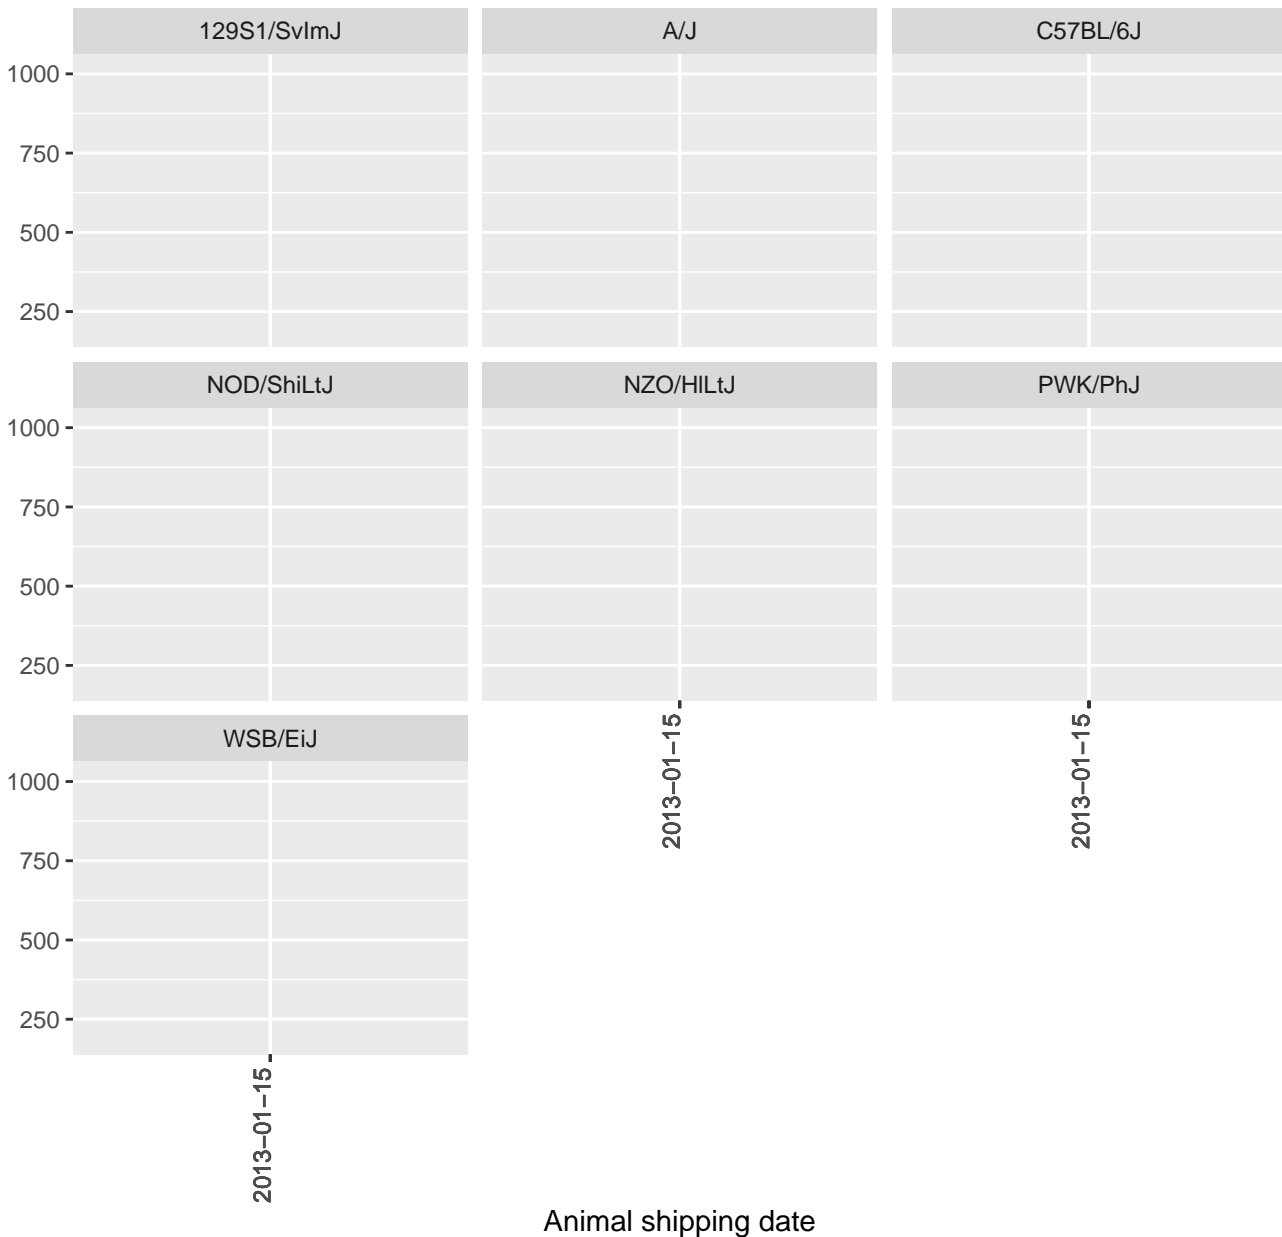

Procedure: GMC20

Parameter: IgM\_21

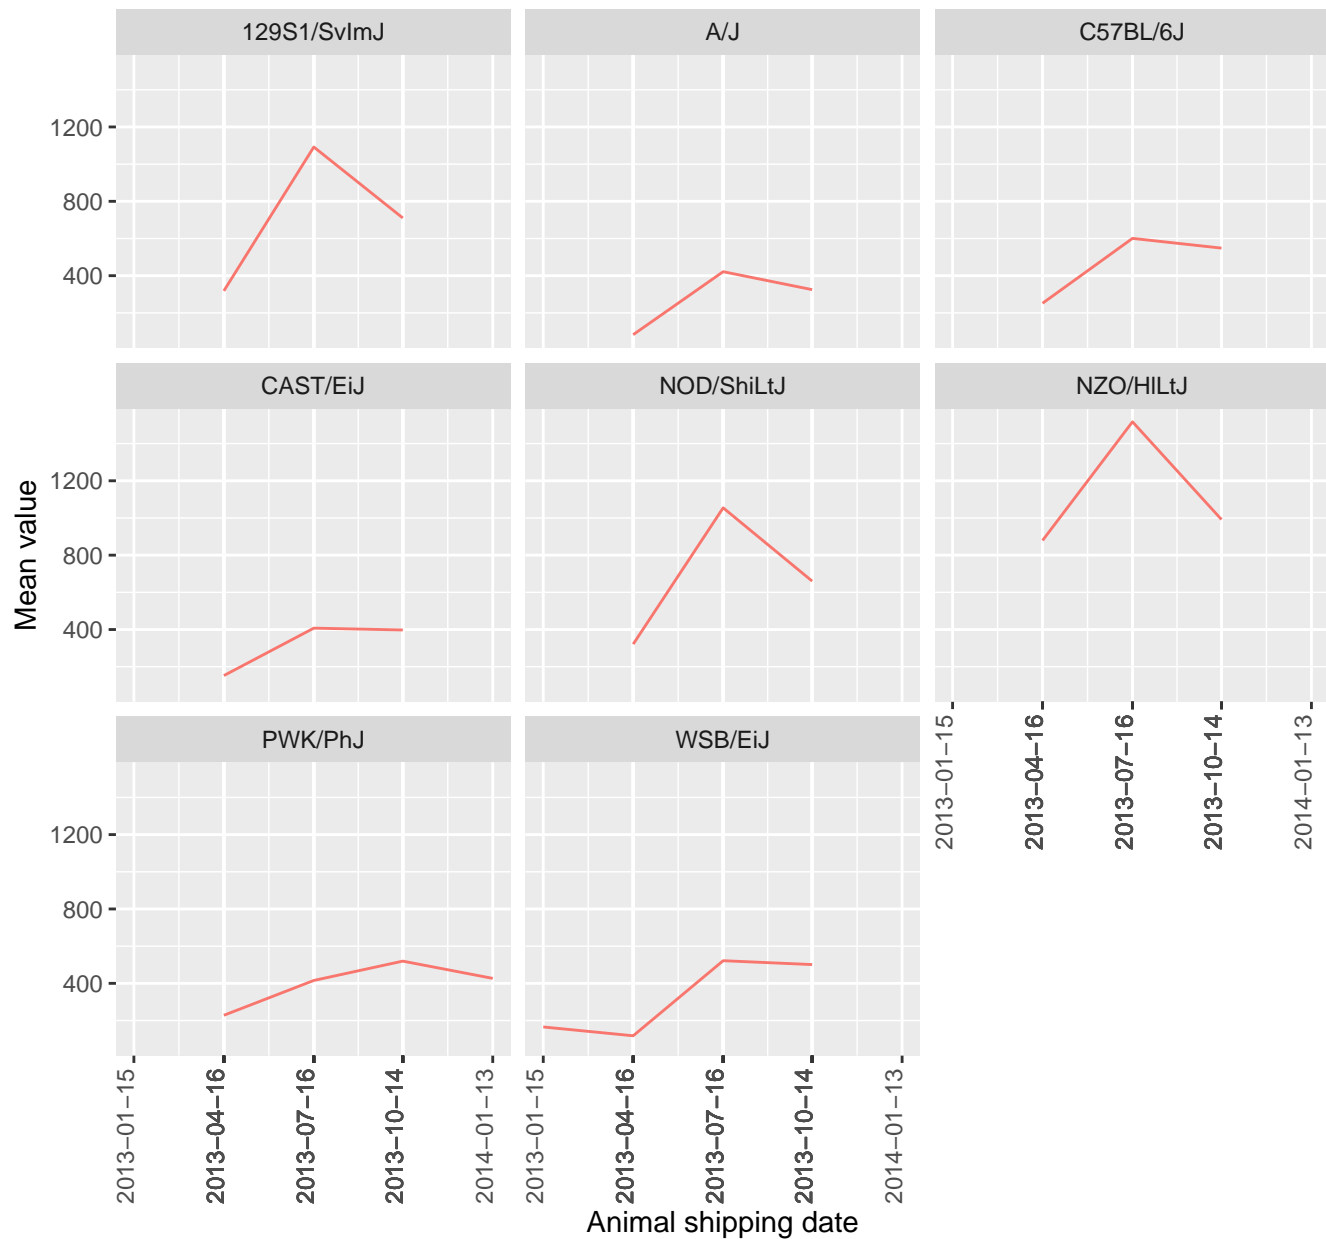

Procedure: GMC20  
Parameter: RF\_17

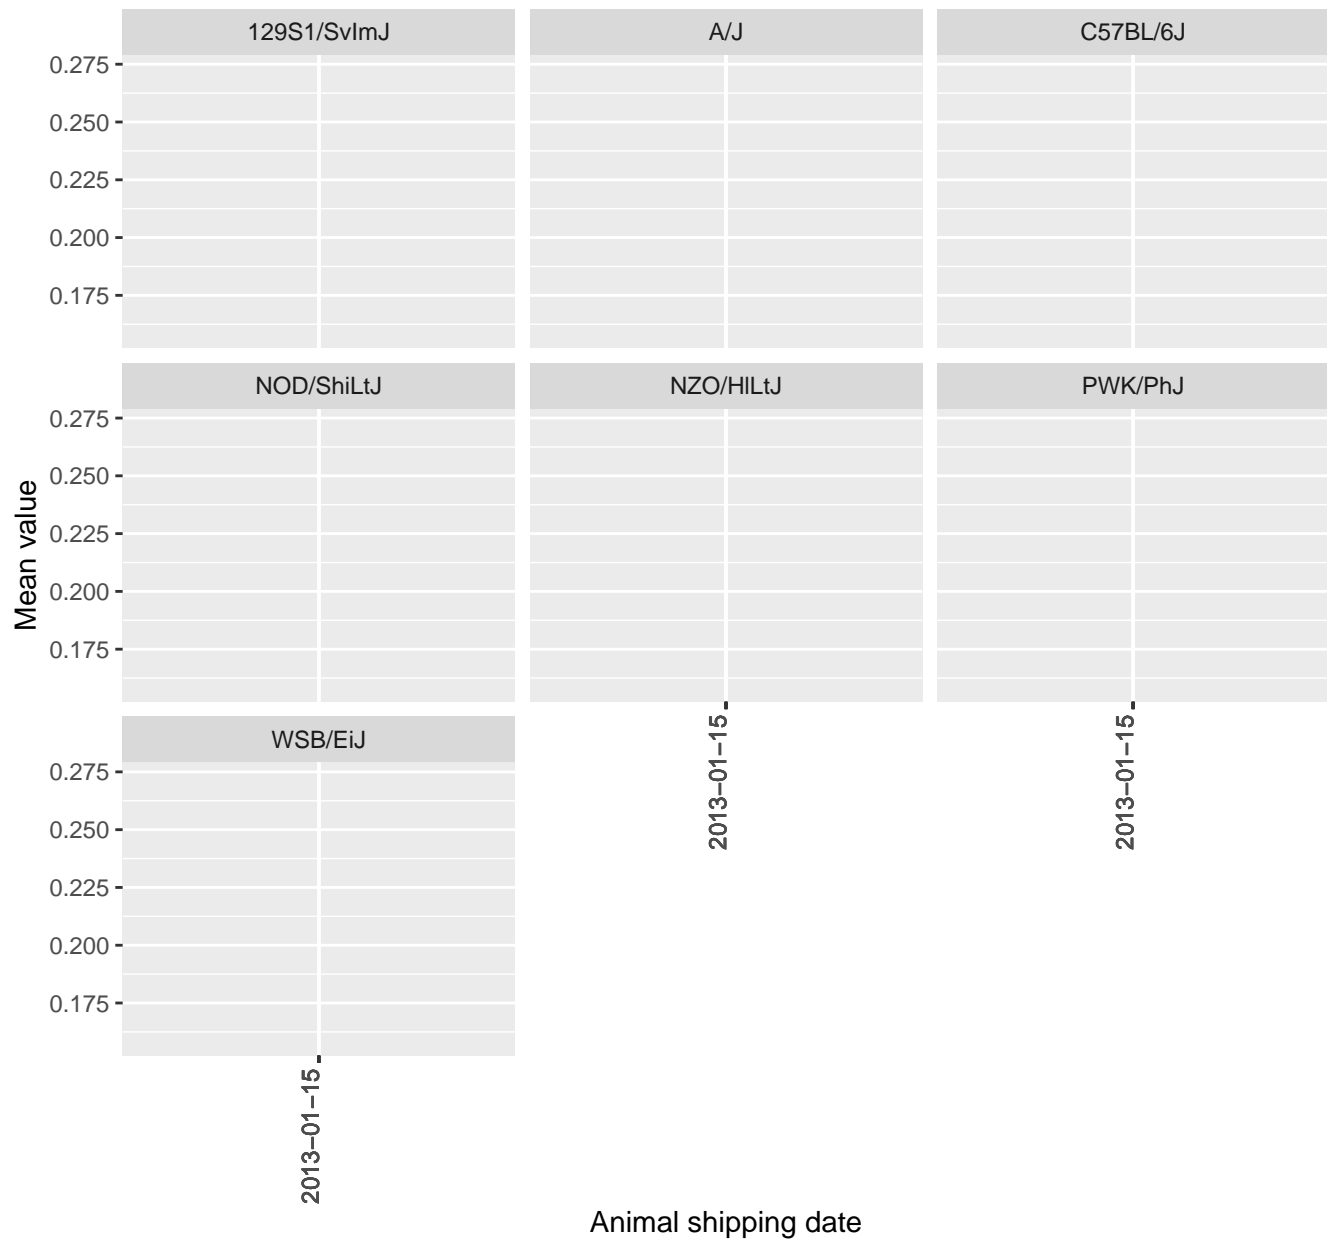

Procedure: GMC20  
Parameter: RF\_21

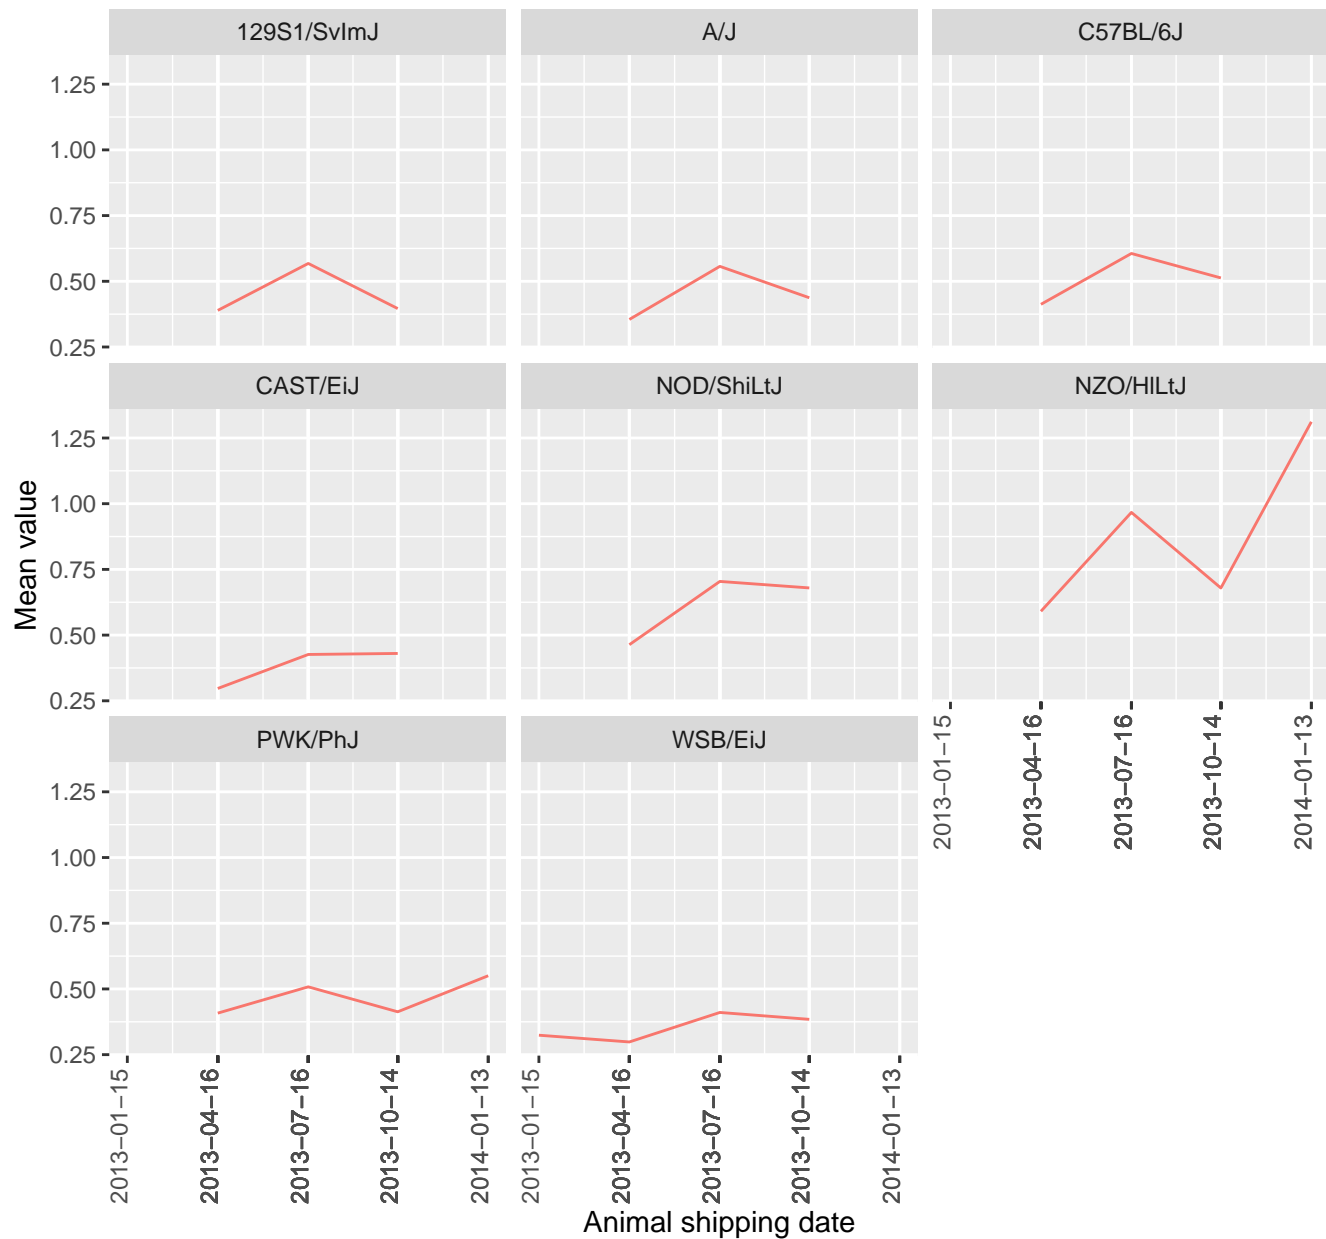

Procedure: GMC21  
Parameter: heart\_wt

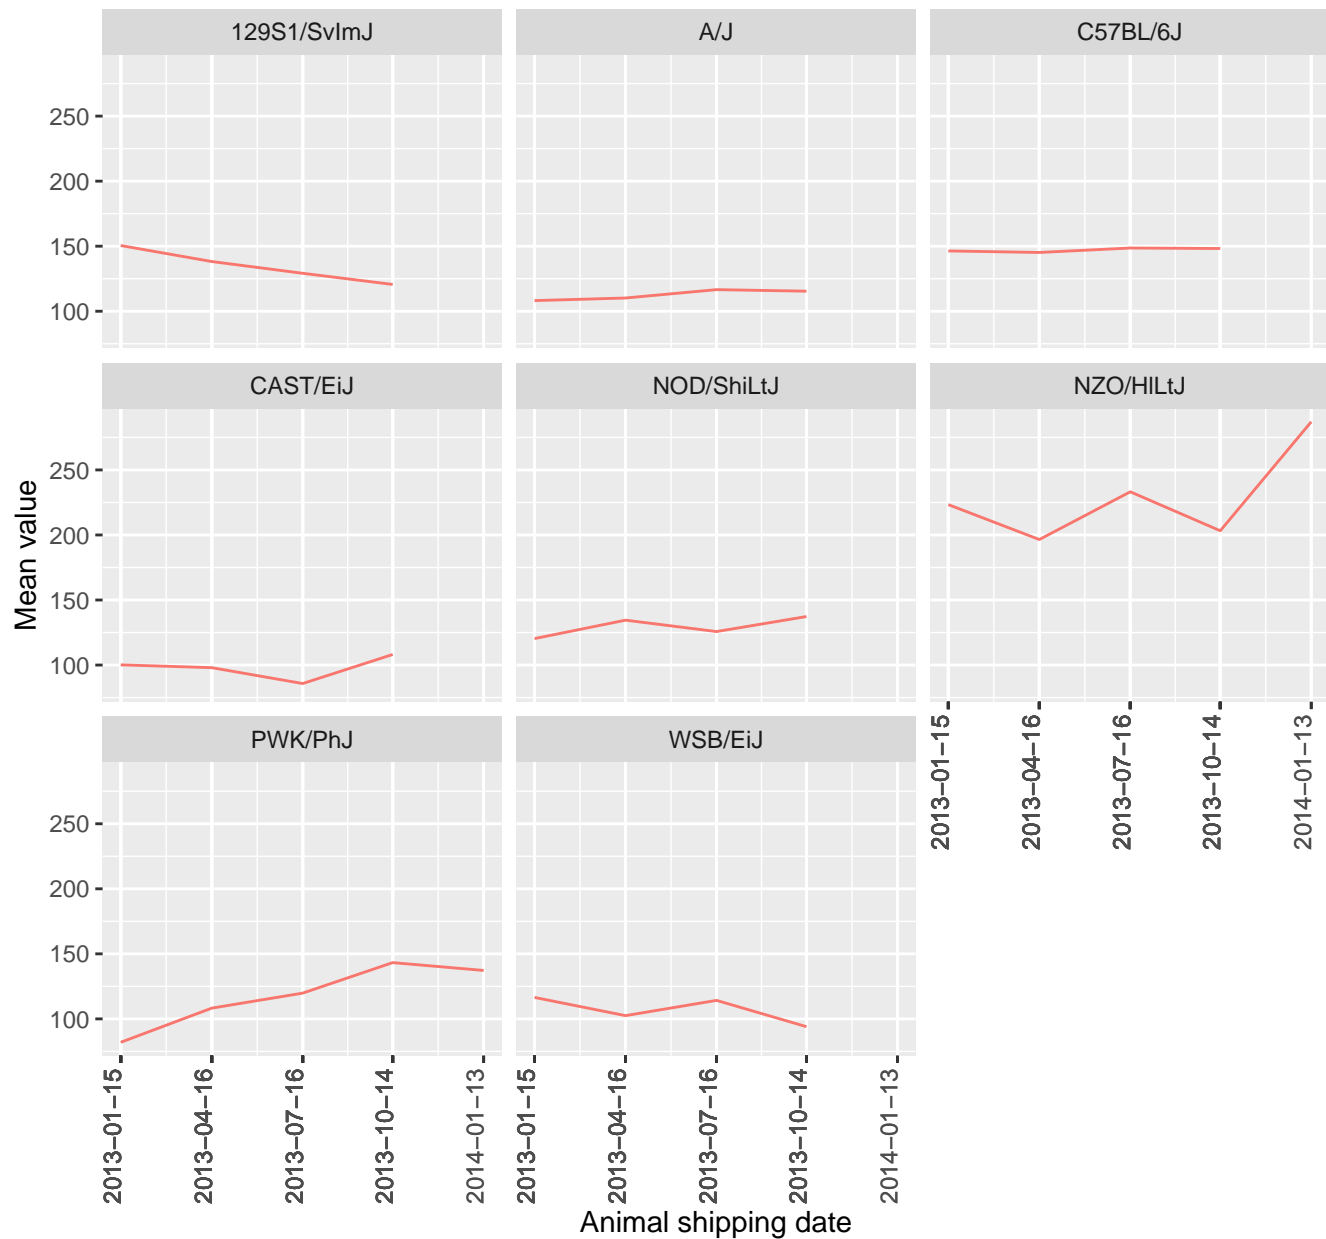

Procedure: GMC21

Parameter: liver\_wt

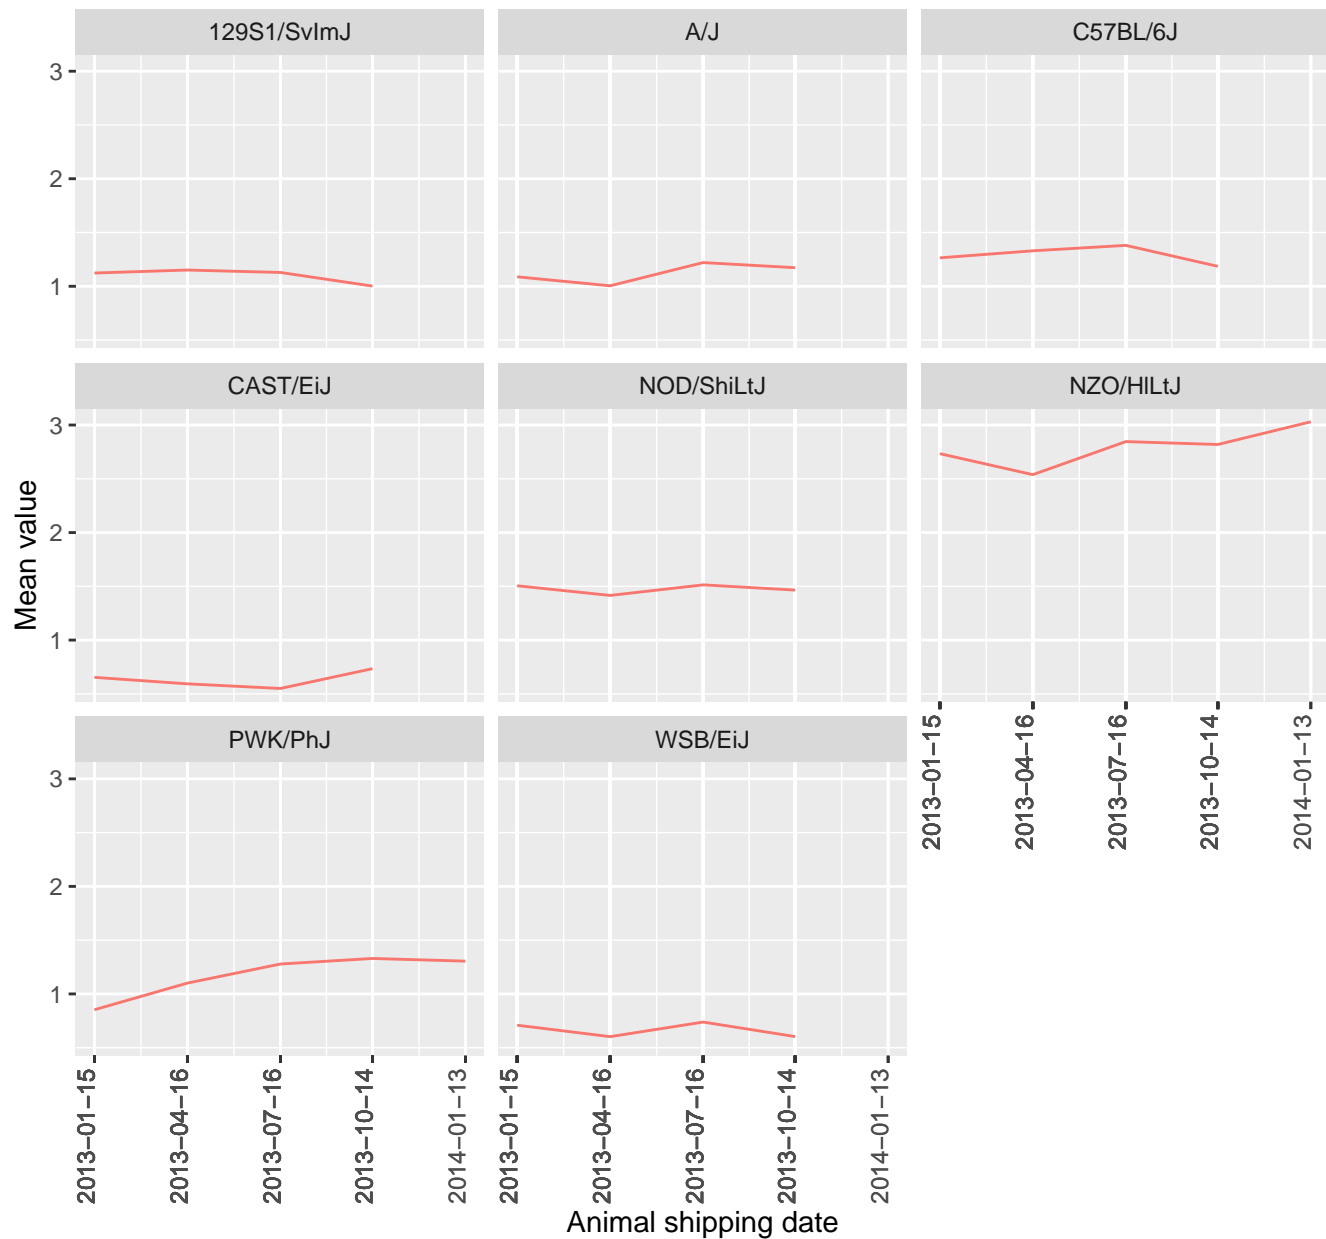

Procedure: GMC21  
Parameter: spleen\_wt

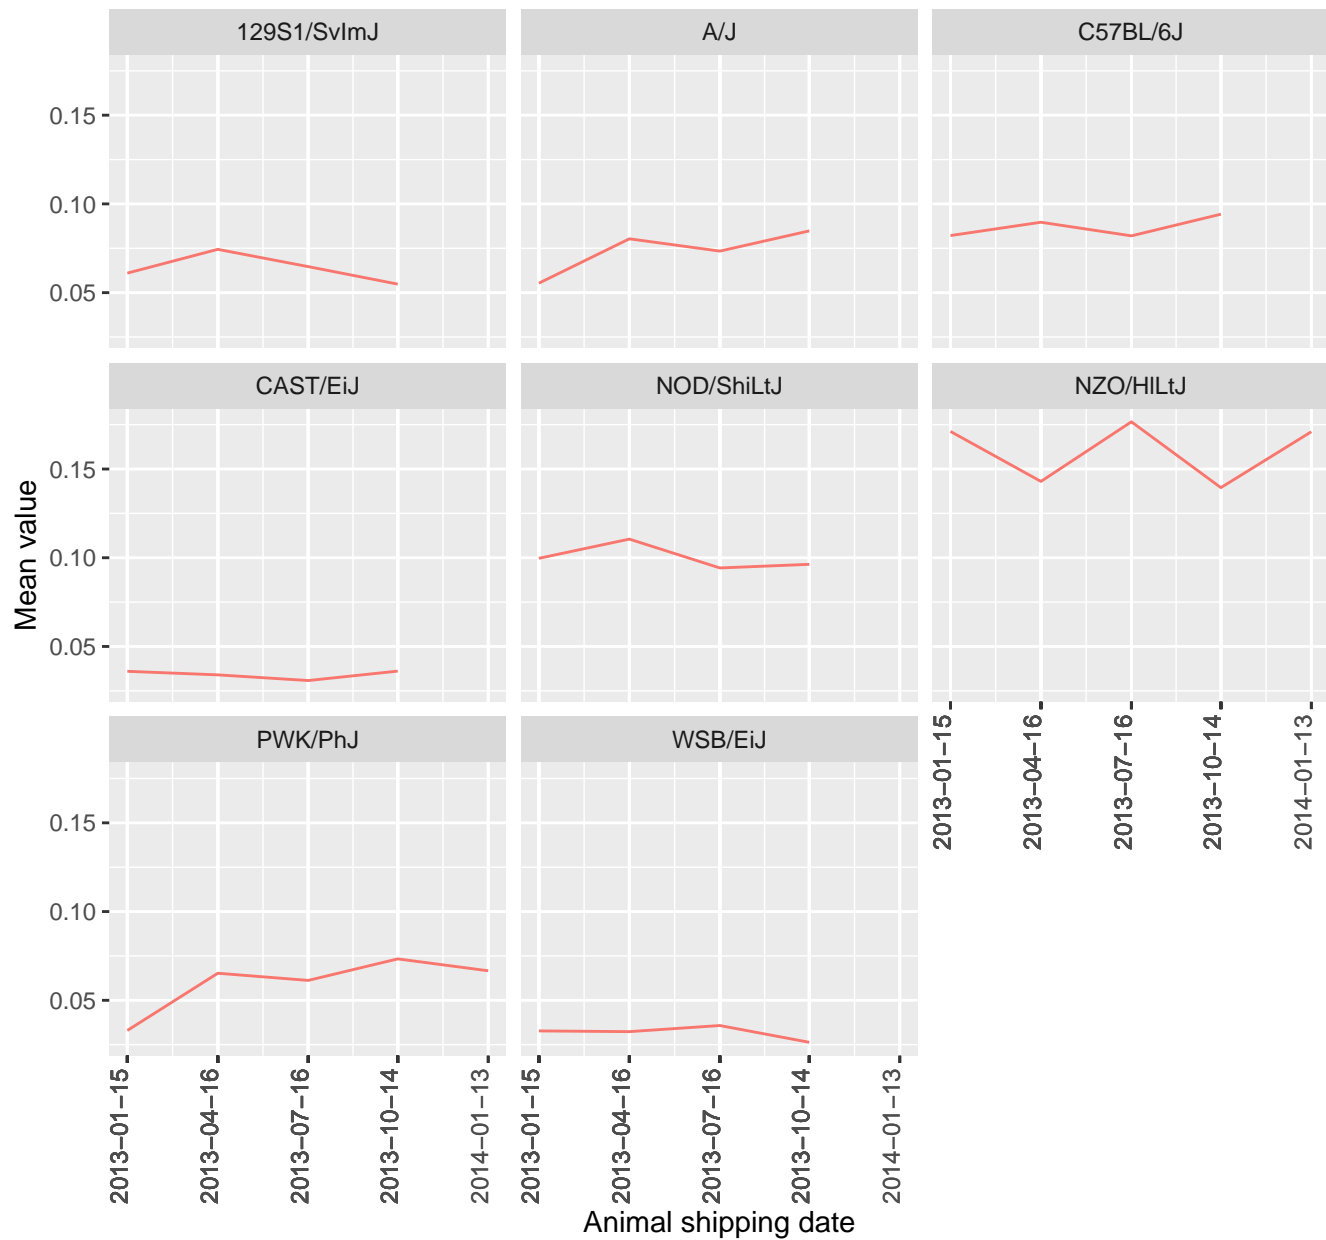

Procedure: GMC21  
Parameter: tibia\_length

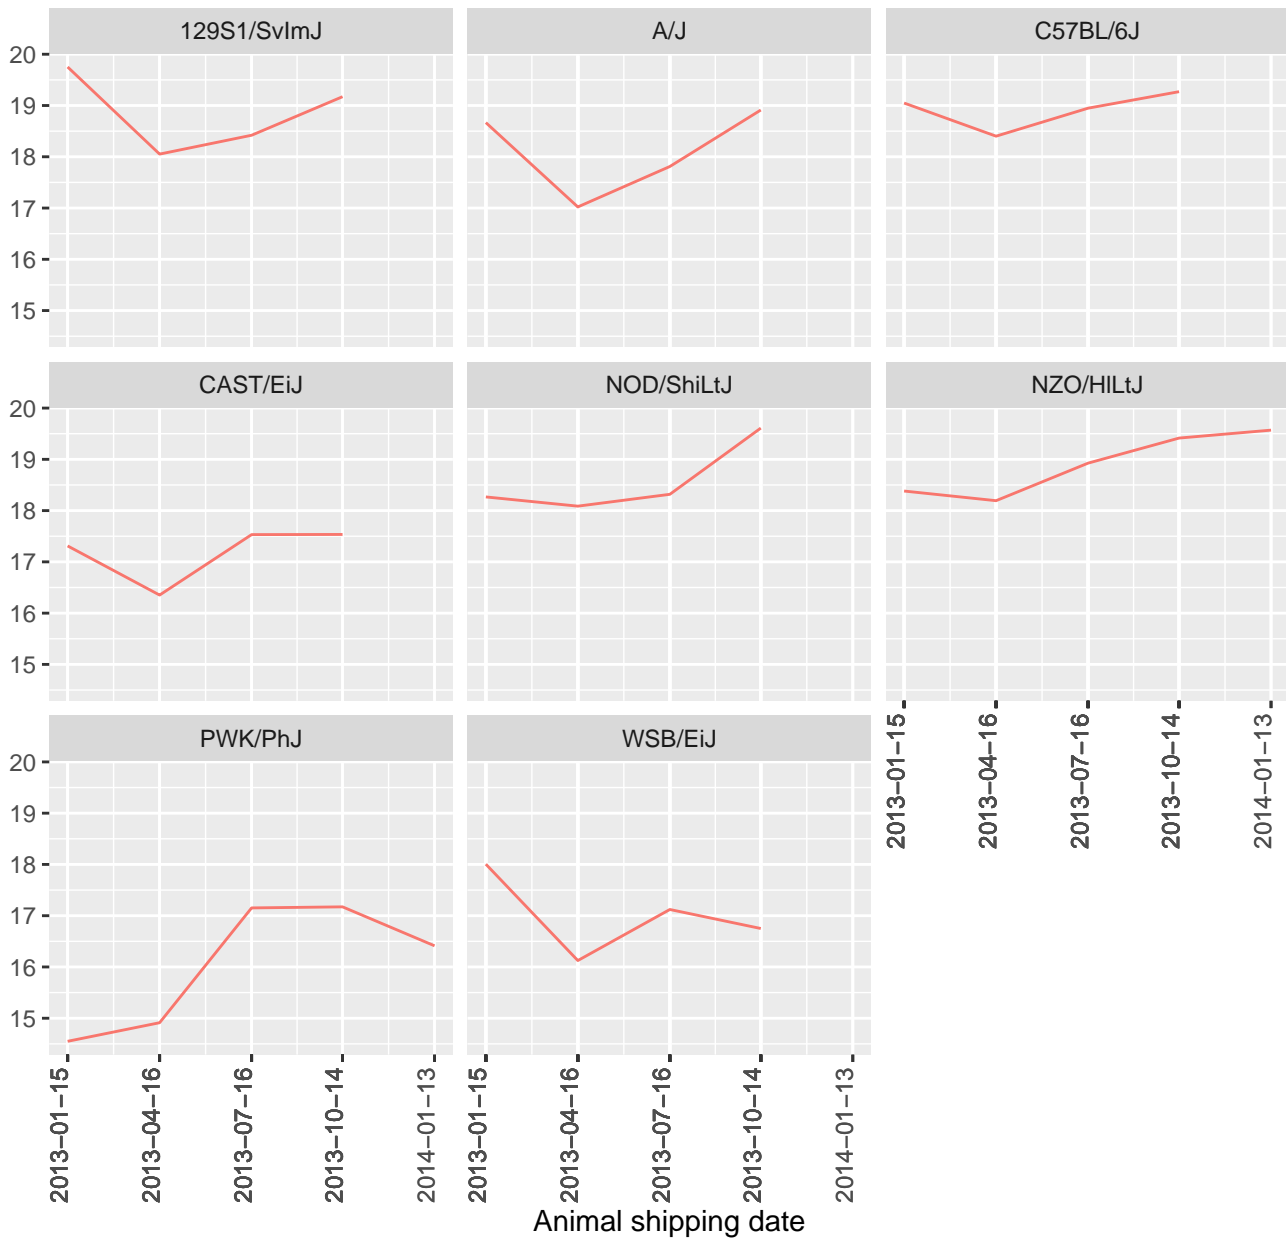

Supplement: 335_2020_9827_MOESM5_ESM.pdf [file 335_2020_9827_MOESM5_ESM.pdf]
