# Supplementary material for: A comprehensive and comparative phenotypic analysis of the collaborative founder strains identifies new and known phenotypes
Source: PubMed Central journal article supplement (PMC7060152; doi:10.1007/s00335-020-09827-3), 2020-02-14
Supplement: 335_2020_9827_MOESM1_ESM.pdf [file 335_2020_9827_MOESM1_ESM.pdf]

## Supplemental material

### **A comprehensive and comparative phenotypic analysis of the Collaborative Founder strains identifies new and known phenotypes**

Heike Kollmus<sup>1</sup>, Helmut Fuchs<sup>2</sup>, Christoph Lengger<sup>2</sup>, Hamed Haselimashhadi<sup>3</sup>, Molly A. Bogue<sup>4</sup>, Manuela A. Östereicher<sup>2</sup>, Marion Horsch<sup>2</sup>, Thure Adler<sup>2</sup>, Juan Antonio Aguilar-Pimentel<sup>2</sup>, Oana Veronica Amarie<sup>2,5</sup>, Lore Becker<sup>2</sup>, Johannes Beckers<sup>2,6,7</sup>, Julia Calzada-Wack<sup>2</sup>, Lillian Garrett<sup>2,5</sup>, Wolfgang Hans<sup>2</sup>, Sabine M. Hölter<sup>2,5</sup>, Tanja Klein-Rodewald<sup>2</sup>, Holger Maier<sup>2</sup>, Philipp Mayer-Kuckuk<sup>2</sup>, Gregor Miller<sup>2</sup>, Kristin Moreth<sup>2</sup>, Frauke Neff<sup>2</sup>, Birgit Rathkolb<sup>2,7,8</sup>, Ildikó Rácz<sup>2#</sup>, Jan Rozman<sup>2,7</sup>, Nadine Spielmann<sup>2</sup>, Irina Treise<sup>2</sup>, Dirk Busch<sup>2,9</sup>, Jochen Graw<sup>5,13</sup>, Thomas Klopstock<sup>10,11,12</sup>, Eckhard Wolf<sup>8</sup>, Wolfgang Wurst<sup>5,11,12,14</sup>, Ali Önder Yildirim<sup>15</sup>, Jeremy Mason<sup>3</sup>, Arturo Torres<sup>3</sup>, Mouse Phenome Database Team<sup>4</sup>, Rudi Balling<sup>16</sup>, Terry Mehaan<sup>3</sup>, Valerie Gailus-Durner<sup>2</sup>, Klaus Schughart<sup>\*1,17,18,19,20</sup>, Martin Hrabě de Angelis<sup>\*2,6,7,19</sup>.

<sup>1</sup>*Department of Infection Genetics, Helmholtz Centre for Infection Research, Inhoffenstr.7, 38124 Braunschweig, Germany*

<sup>2</sup>*German Mouse Clinic, Institute of Experimental Genetics, Helmholtz Zentrum München, German Research Center for Environmental Health, Ingolstädter Landstrasse 1, 85764 Neuherberg, Germany*

<sup>3</sup>*European Molecular Biology Laboratory, European Bioinformatics Institute, Wellcome Trust Genome Campus, Hinxton, Cambridge CB10 1SD, UK*

<sup>4</sup>*The Jackson Laboratory, Bar Harbor, Maine 04609, USA*

<sup>5</sup>*Institute of Developmental Genetics, Helmholtz Zentrum München, German Research Center for Environmental Health, Ingolstädter Landstrasse 1, 85764 Neuherberg, Germany*

<sup>6</sup>*Chair of Experimental Genetics, School of Life Science Weihenstephan, Technische Universität München, Alte Akademie 8, 85354 Freising, Germany*

<sup>7</sup>*German Center for Diabetes Research (DZD), Ingolstädter Landstr. 1, 85764 Neuherberg, Germany*

<sup>8</sup>*Institute of Molecular Animal Breeding and Biotechnology, Gene Center, Ludwig-Maximilians-University München, Feodor-Lynen Str. 25, 81377 Munich, Germany*

<sup>9</sup>*Institute for Medical Microbiology, Immunology and Hygiene, Technische Universität München, Trogerstrasse 30, 81675 Munich, Germany.*

<sup>10</sup>*Dept. of Neurology, Friedrich-Baur-Institute, Klinikum der Ludwig-Maximilians-Universität München, Ziemssenstr. 1a, 80336 Munich, Germany*

<sup>11</sup>*Deutsches Zentrum für Neurodegenerative Erkrankungen (DZNE) Site Munich, Feodor-Lynen-Str. 17, 81377 Munich, Germany*

<sup>12</sup>*Munich Cluster for Systems Neurology (SyNergy), Adolf-Butenandt-Institut, Ludwig-Maximilians-Universität München, Feodor-Lynen-Str. 17, 81377 Munich, Germany*

<sup>13</sup>*retired*

<sup>14</sup>*Chair of Developmental Genetics, Technische Universität München-Weihenstephan, c/o Helmholtz Zentrum München, Ingolstädter Landstr. 1, 85764 Neuherberg, Germany*

<sup>15</sup>*Institute of Lung Biology and Disease , Helmholtz Zentrum München, German Research Center for Environmental Health, Ingolstädter Landstrasse 1, D-85764 Neuherberg, Germany and Member of the German Center for Lung Research*

<sup>16</sup>*Luxembourg Centre for Systems Biomedicine (LCSB), University of Luxembourg, Luxembourg*

<sup>17</sup>*University of Veterinary Medicine Hannover, Germany*

<sup>18</sup>*University of Tennessee Health Science Center, Memphis, TN, USA*

<sup>19</sup>*authors contributed equally*

<sup>20</sup>*author for correspondence at: Helmholtz Centre for Infection Research, Dept. of Infection Genetics, Inhoffenstr.7, D-38124 Braunschweig, Germany*

E-mail address: klaus.schughart@helmholtz-hzi.de

\*equal contributions as last authors.

#present address: Clinic of Neurodegenerative Diseases and Gerontopsychiatry, University of Bonn Medical Center, Bonn, Germany

### **Fig. S1 Outline of the phenotyping pipeline**

Shaded boxes show lower animal numbers than 16 mice per sex.

### **Fig. S2 Heat maps of GMC projects**

Individual heat maps of all parameters from a given GMC project are shown.

### **Fig. S3 Correlation heat maps for all measured parameters**

Heat map of Pearson correlations for all individual parameters are shown.

### **Fig. S4 Effect of batch and strain**

For each parameter, the measurements with reference to batch and strain are plotted.

### **Table S1 Significant parameters from ANOVA for strain as explanatory variable**

measnum: MPD ID of measurement; projsym: project in MPD; varname: parameter name; descrip: Description of parameter; units: measured units of parameter; aspect: explanatory variable; mean\_sq: mean of squares; sum\_sq: sum of squares; precise\_pvalue\_prf: p-value not corrected for multiple testing; adj.p.value.BH: p-value adjusted for multiple testing using BH correction.

### **Table S2 Significant parameters from ANOVA for sex as explanatory variable**

measnum: MPD ID of measurement; projsym: project in MPD; varname: parameter name; descrip: Description of parameter; units: measured units of parameter; aspect: explanatory variable; mean\_sq: mean of squares; sum\_sq: sum of squares; precise\_pvalue\_prf: p-value not corrected for multiple testing; adj.p.value.BH: p-value adjusted for multiple testing using BH correction.

### **Table S3 Significant parameters from ANOVA for strain and sex interaction**

measnum: MPD ID of measurement; projsym: project in MPD; varname: parameter name; descrip: Description of parameter; units: measured units of parameter; aspect: explanatory variable; mean\_sq: mean of squares; sum\_sq: sum of squares; precise\_pvalue\_prf: p-value not corrected for multiple testing; adj.p.value.BH: p-value adjusted for multiple testing using BH correction.

### **Table S4 Correlations between parameters**

The table shows the results from the correlation analysis of all parameters used to generate the correlation heat map.

### **Table S5: ANOVA of comparisons between wild-derived, laboratory and diseases model strains**

Results from ANOVA with parameter measurements as response variable and strain groups (wild-derived, laboratory and diseases model strains) as explanatory variables.

### **Table S6 Analysis of batch effects**

Results from an ANOVA for all measured parameters as response variable and batch (shipment date) as explanatory variable (model: parameter ~ batch). p-values were not corrected for multiple testing.

### **Table S7 Examples of power calculations from selected trait data**

Three significant traits from the pair-wise comparisons were selected from projects GMC1 and GMC16 and the group sizes were calculated with the R function power.t.test using the following settings: power=0.8, significance level (sig.level)=0.05, standard deviation (sd) as the mean of all sd values for the selected parameter over all strains, delta=difference in means between strain 129S1/SvImJ and any other strain. For example for the comparison of center\_distance\_total between strain 129S1/SvImJ and C57BL/6J, a group size of n=3 would have been enough to detect the observed difference between the two strains. For the comparison of center\_distance\_total between strain 129S1/SvImJ and NZO/HILtJ, a group size of n=20 would have been necessary to obtain the observed difference between the two strains. For the comparison of iron at day 21 between strain 129S1/SvImJ and A/J, a group size of n=28 would have been necessary to obtain the observed difference between the two strains. For the comparison of iron at day 21 between strain 129S1/SvImJ and NOD/ShiLtJ, the theoretical group size is n=2282. Thus, this difference is too small and not be significant between the two strains.

**Table S8 Significance of explanatory variables from analysis of project GMC21 heart weight**

The table shows the results from the statistical analysis obtained from the final linear model:  $\text{lm}(\log(\text{heart\_wt}) \sim \text{strain} + \text{sex} + \text{bw})$ . All three explanatory variables, strain, sex and body weight (bw), are significant.
