# Supplementary material for: A comprehensive and comparative phenotypic analysis of the collaborative founder strains identifies new and known phenotypes
Source: PubMed Central journal article supplement (PMC7060152; doi:10.1007/s00335-020-09827-3), 2020-02-14

Correlation

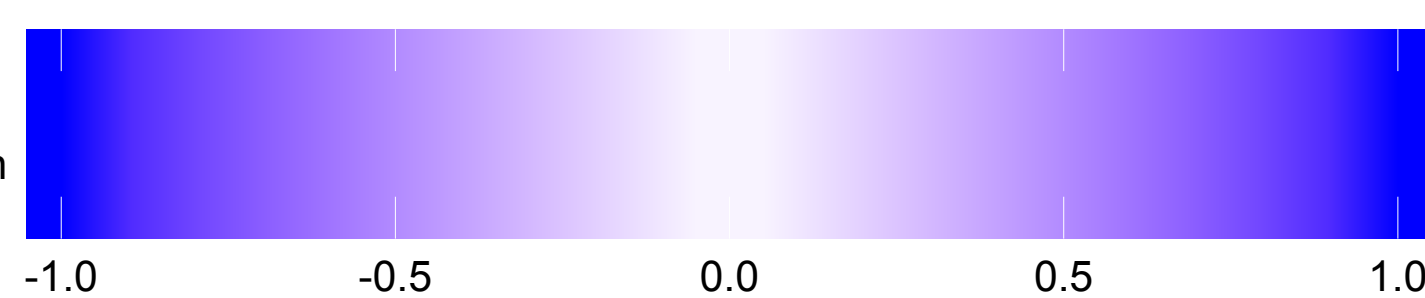

Figure S3

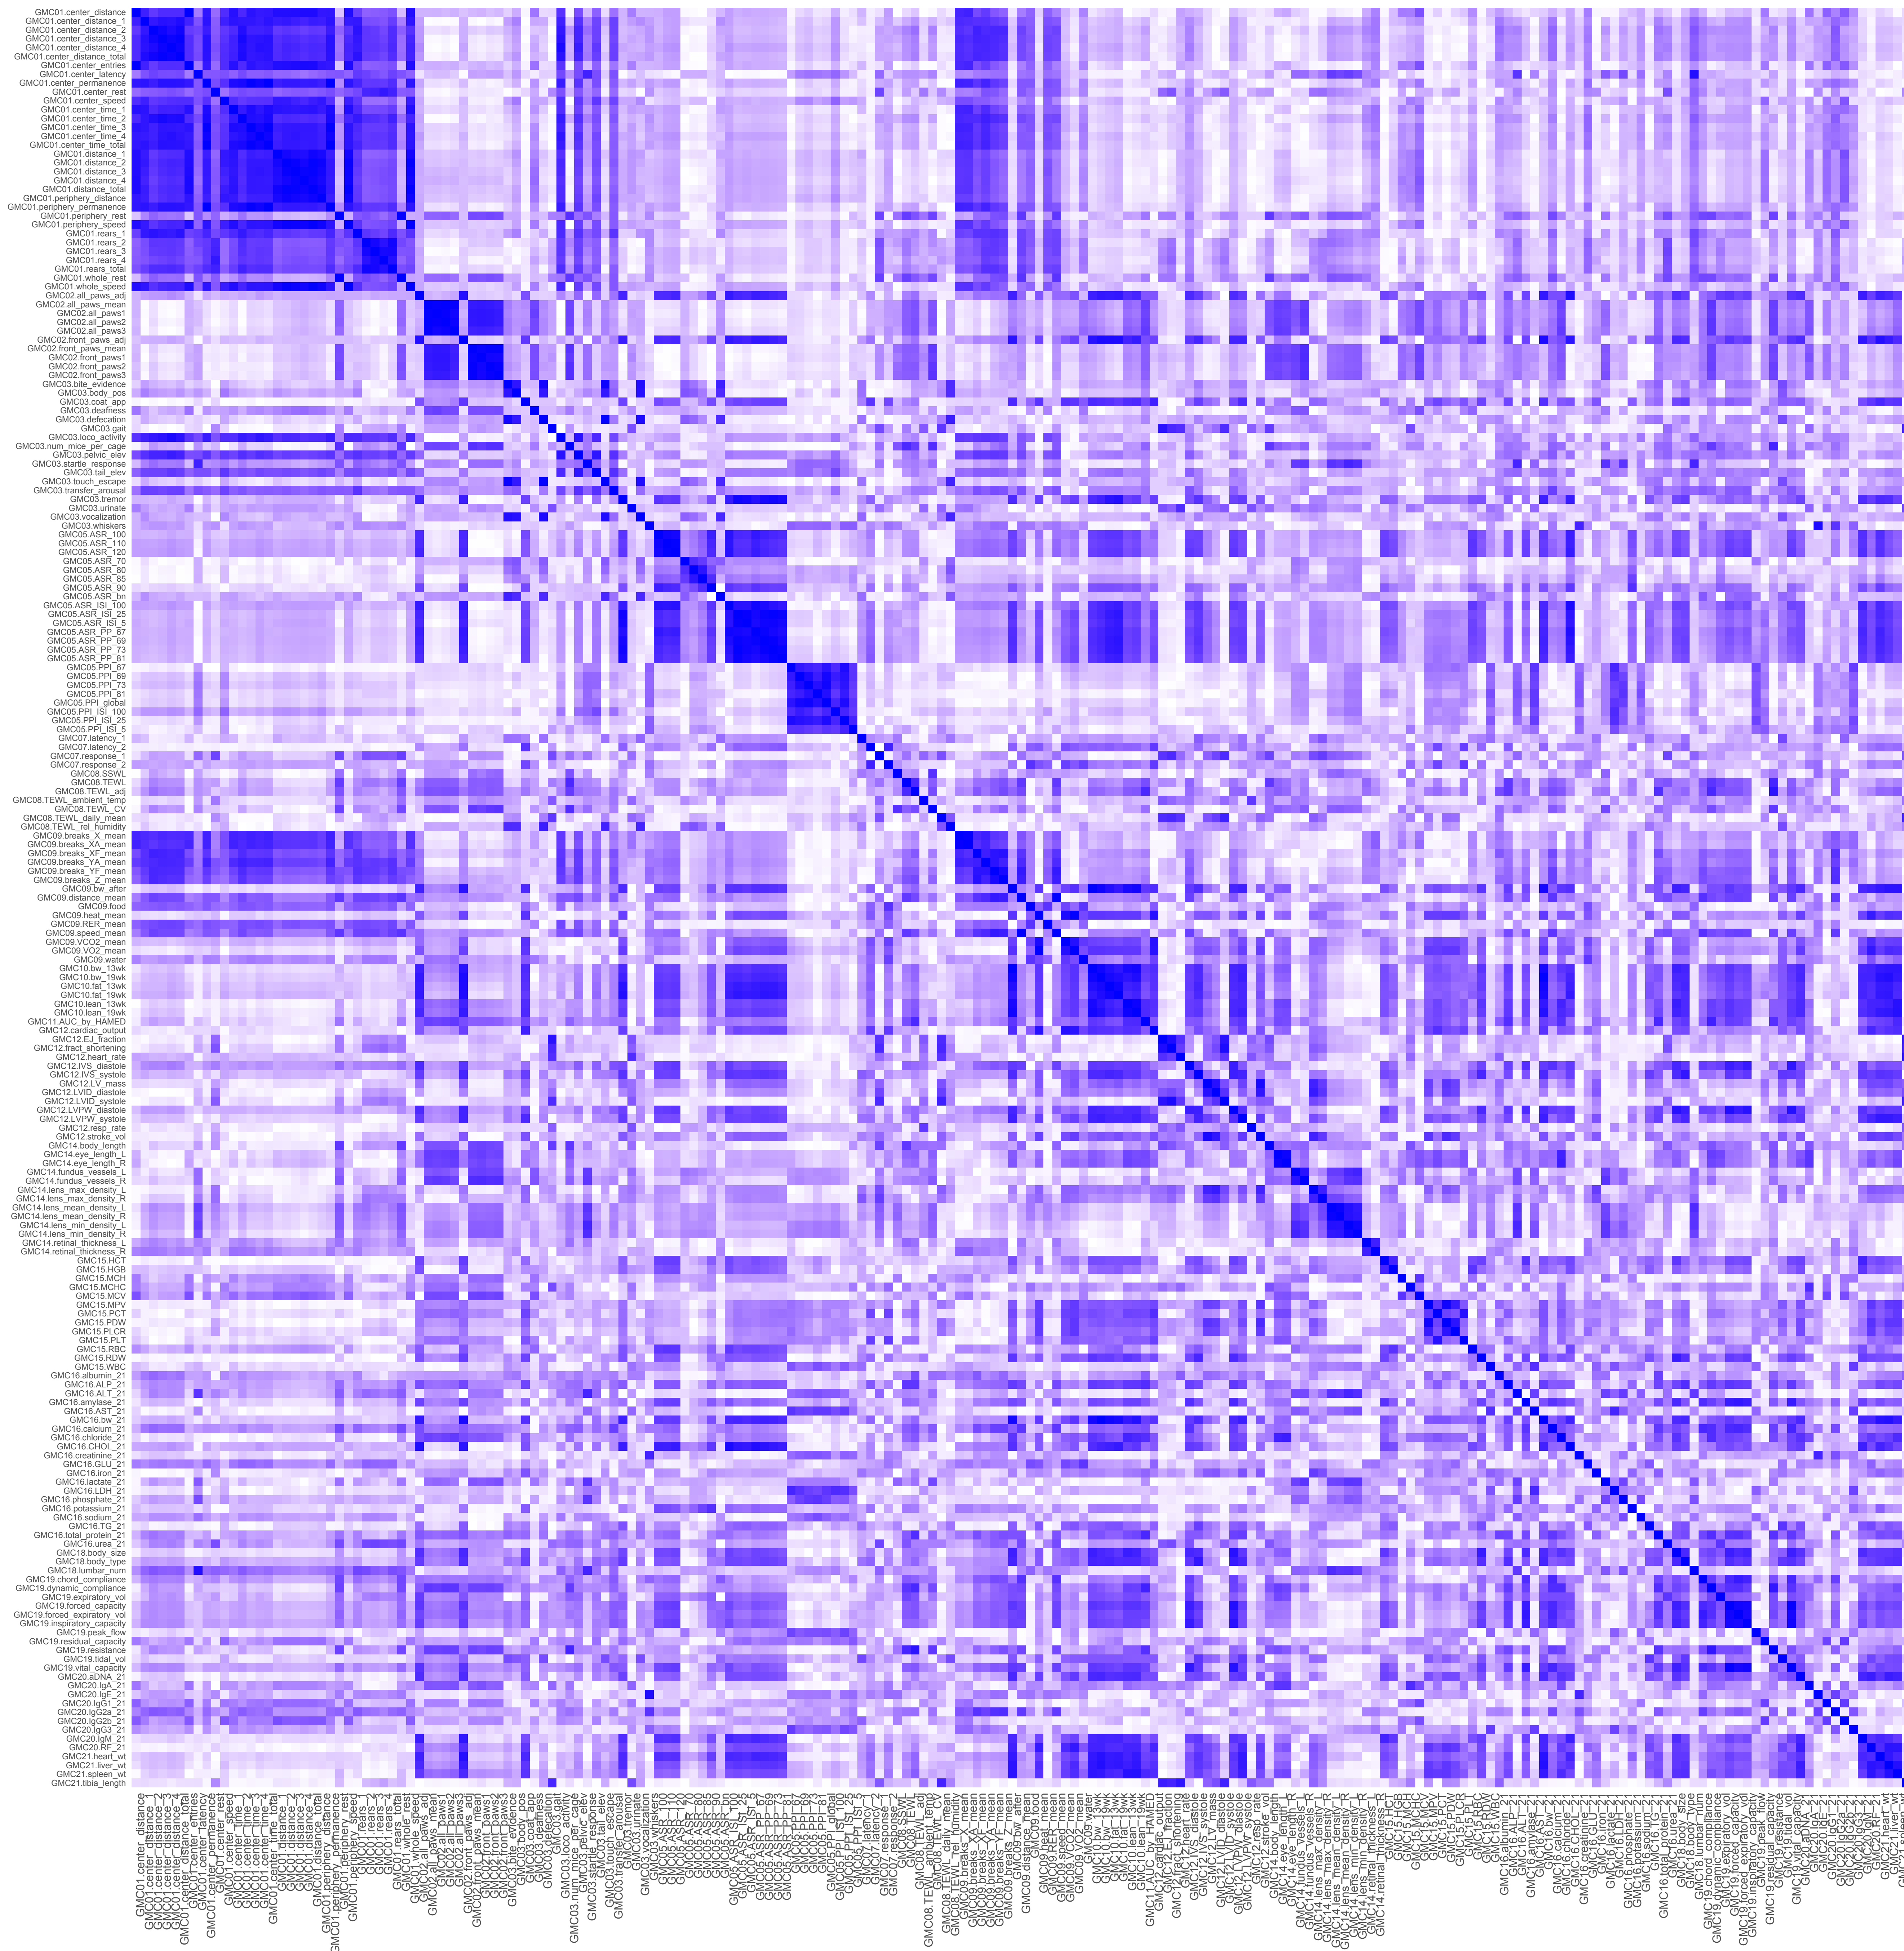

Supplement: 335_2020_9827_MOESM4_ESM.pdf [file 335_2020_9827_MOESM4_ESM.pdf]
