# Supplementary material for: A comprehensive and comparative phenotypic analysis of the collaborative founder strains identifies new and known phenotypes
Source: PubMed Central journal article supplement (PMC7060152; doi:10.1007/s00335-020-09827-3), 2020-02-14
Supplement: 335_2020_9827_MOESM6_ESM.pdf [file 335_2020_9827_MOESM6_ESM.pdf]

# Table S1

| measnum | projsym | varname               | descrip                                                              | units     | aspect | mean_sq     | sum_sq      | precise_pvalue_prf | adj.p.value.BH |
|---------|---------|-----------------------|----------------------------------------------------------------------|-----------|--------|-------------|-------------|--------------------|----------------|
| 55001   | GMC01   | bw                    | body weight                                                          | g         | strain | 2623,242    | 18362,6939  | 9,87E-166          | 7,66E-164      |
| 55011   | GMC01   | distance_1            | distance traveled, successive 5 min intervals                        | cm        | strain | 373535763,5 | 2614750345  | 4,34E-99           | 1,09E-97       |
| 55012   | GMC01   | distance_2            | distance traveled, successive 5 min intervals                        | cm        | strain | 305606607,4 | 2139246252  | 2,55E-92           | 5,88E-91       |
| 55013   | GMC01   | distance_3            | distance traveled, successive 5 min intervals                        | cm        | strain | 243582663,4 | 1705078644  | 1,54E-92           | 3,65E-91       |
| 55014   | GMC01   | distance_4            | distance traveled, successive 5 min intervals                        | cm        | strain | 237943416,9 | 1665603918  | 7,30E-100          | 1,89E-98       |
| 55015   | GMC01   | distance_total        | distance traveled total, 20 min test                                 | cm        | strain | 4567184115  | 31970288804 | 6,44E-109          | 2,04E-107      |
| 55021   | GMC01   | rears_1               | number of rears, successive 5 min intervals                          | n         | strain | 6519,6112   | 45637,2785  | 9,88E-54           | 8,36E-53       |
| 55022   | GMC01   | rears_2               | number of rears, successive 5 min intervals                          | n         | strain | 9266,4665   | 64865,2654  | 2,79E-68           | 3,40E-67       |
| 55023   | GMC01   | rears_3               | number of rears, successive 5 min intervals                          | n         | strain | 8193,6927   | 57355,8487  | 7,72E-68           | 9,16E-67       |
| 55024   | GMC01   | rears_4               | number of rears, successive 5 min intervals                          | n         | strain | 7962,4287   | 55737,0007  | 1,41E-66           | 1,62E-65       |
| 55025   | GMC01   | rears_total           | number of rears total, 20 min test                                   | n         | strain | 118132,0042 | 826924,0292 | 2,02E-78           | 2,74E-77       |
| 55031   | GMC01   | whole_rest            | resting time in whole arena, 20 min test                             | s         | strain | 169879,4337 | 1189156,036 | 1,82E-79           | 2,55E-78       |
| 55032   | GMC01   | whole_speed           | average speed in whole arena, 20 min test                            | cm/s      | strain | 3840,1979   | 26881,3855  | 2,01E-111          | 6,61E-110      |
| 55041   | GMC01   | center_distance       | distance traveled in center of arena, 20 min test                    | cm        | strain | 632749723,8 | 4429248067  | 1,17E-114          | 4,16E-113      |
| 55042   | GMC01   | center_rest           | resting time in center of arena, 20 min test                         | s         | strain | 853,9171    | 5977,42     | 3,52E-19           | 1,51E-18       |
| 55043   | GMC01   | center_permanence     | permanence time in center of arena, 20 min test                      | s         | strain | 385168,1725 | 2696177,207 | 6,24E-87           | 1,20E-85       |
| 55044   | GMC01   | center_speed          | average speed in center of arena, 20 min test                        | cm/s      | strain | 5620,2725   | 39341,9077  | 1,27E-53           | 1,05E-52       |
| 55045   | GMC01   | center_latency        | latency to enter in center of arena, 20 min test                     | s         | strain | 3414492,912 | 23901450,38 | 2,08E-50           | 1,59E-49       |
| 55046   | GMC01   | center_entries        | number of entries in center of arena, 20 min test                    | n         | strain | 1053307,113 | 7373149,789 | 5,64E-115          | 2,10E-113      |
| 55051   | GMC01   | center_distance_1     | center distance, successive 5 min intervals                          | %         | strain | 3450,2928   | 24152,0494  | 1,62E-81           | 2,47E-80       |
| 55052   | GMC01   | center_distance_2     | center distance, successive 5 min intervals                          | %         | strain | 4880,1108   | 34160,7759  | 4,17E-84           | 6,72E-83       |
| 55053   | GMC01   | center_distance_3     | center distance, successive 5 min intervals                          | %         | strain | 6071,3226   | 42499,2582  | 1,39E-76           | 1,83E-75       |
| 55054   | GMC01   | center_distance_4     | center distance, successive 5 min intervals                          | %         | strain | 6037,8064   | 42264,6448  | 5,45E-83           | 8,46E-82       |
| 55055   | GMC01   | center_distance_total | percentage of total distance in center, 20 min test                  | %         | strain | 4870,5918   | 34094,1427  | 2,21E-108          | 6,74E-107      |
| 55061   | GMC01   | center_time_1         | center time, successive 5 min intervals                              | %         | strain | 1758,0384   | 12306,269   | 1,67E-67           | 1,95E-66       |
| 55062   | GMC01   | center_time_2         | center time, successive 5 min intervals                              | %         | strain | 2287,0182   | 16009,1277  | 7,98E-59           | 8,02E-58       |
| 55063   | GMC01   | center_time_3         | center time, successive 5 min intervals                              | %         | strain | 3441,1799   | 24088,2594  | 1,47E-52           | 1,17E-51       |
| 55064   | GMC01   | center_time_4         | center time, successive 5 min intervals                              | %         | strain | 3650,9348   | 25556,5438  | 6,73E-64           | 7,46E-63       |
| 55065   | GMC01   | center_time_total     | percentage of total time spent in center, 20 min test                | %         | strain | 2674,8994   | 18724,2961  | 6,46E-87           | 1,20E-85       |
| 55071   | GMC01   | periphery_distance    | distance traveled in periphery, 20 min test                          | cm        | strain | 1854820364  | 12983742549 | 4,96E-87           | 1,01E-85       |
| 55072   | GMC01   | periphery_rest        | resting time in periphery, 20 min test                               | s         | strain | 153654,5703 | 1075581,992 | 7,89E-84           | 1,25E-82       |
| 55073   | GMC01   | periphery_permanence  | permanence time in periphery, 20 min test                            | s         | strain | 385175,4796 | 2696228,357 | 6,24E-87           | 1,20E-85       |
| 55074   | GMC01   | periphery_speed       | average speed in periphery, 20 min test                              | cm/s      | strain | 3190,4426   | 22333,0985  | 1,21E-107          | 3,56E-106      |
| 55101   | GMC02   | bw                    | body weight                                                          | g         | strain | 2876,4417   | 20135,0921  | 1,63E-180          | 2,78E-178      |
| 55111   | GMC02   | front_paws1           | forelimb grip strength                                               | g         | strain | 11161,9119  | 78133,3832  | 2,15E-40           | 1,35E-39       |
| 55112   | GMC02   | front_paws2           | forelimb grip strength                                               | g         | strain | 10936,6201  | 76556,3406  | 1,49E-42           | 9,80E-42       |
| 55113   | GMC02   | front_paws3           | forelimb grip strength                                               | g         | strain | 11553,9522  | 80877,6657  | 7,79E-42           | 4,91E-41       |
| 55114   | GMC02   | front_paws_mean       | forelimb grip strength, mean                                         | g         | strain | 11171,3229  | 78199,2603  | 8,56E-49           | 6,41E-48       |
| 55115   | GMC02   | front_paws_adj        | forelimb grip strength (mean) normalized to body weight              | ratio     | strain | 44,0589     | 308,4123    | 2,89E-58           | 2,81E-57       |
| 55121   | GMC02   | all_paws1             | forelimb and hindlimb grip strength                                  | g         | strain | 42574,514   | 298021,5978 | 4,17E-58           | 3,91E-57       |
| 55122   | GMC02   | all_paws2             | forelimb and hindlimb grip strength                                  | g         | strain | 39793,9737  | 278557,8156 | 9,63E-57           | 8,66E-56       |
| 55123   | GMC02   | all_paws3             | forelimb and hindlimb grip strength                                  | g         | strain | 38343,327   | 268403,2889 | 2,05E-53           | 2,04E-52       |
| 55124   | GMC02   | all_paws_mean         | forelimb and hindlimb grip strength, mean                            | g         | strain | 40090,265   | 280631,8548 | 1,89E-61           | 1,97E-60       |
| 55125   | GMC02   | all_paws_adj          | forelimb and hindlimb grip strength (mean) normalized to body weight | ratio     | strain | 133,1023    | 931,7162    | 1,97E-61           | 2,03E-60       |
| 55201   | GMC03   | bw                    | body weight                                                          | g         | strain | 2876,4417   | 20135,0921  | 1,63E-180          | 2,78E-178      |
| 55211   | GMC03   | coat_app              | coat appearance (1=tidy, 2=irregular)                                | score     | strain | 0,6091      | 4,2639      | 8,24E-13           | 3,14E-12       |
| 55212   | GMC03   | whiskers              | whiskers (0=present, 1=absent)                                       | score     | strain | 3,9898      | 27,9286     | 7,76E-156          | 5,10E-154      |
| 55213   | GMC03   | body_pos              | body position (0=inactive, 1=active, 2=excessively active)           | score     | strain | 0,6929      | 4,8505      | 3,44E-16           | 1,41E-15       |
| 55214   | GMC03   | pelvic_elev           | pelvic elevation (0=less than 5, 1=5 or more, 2=no data)             | score     | strain | 6,4353      | 45,0472     | 2,64E-65           | 2,97E-64       |
| 55215   | GMC03   | tail_elev             | tail elevation (0=dragging, 1=horizontal, 2=elevated)                | score     | strain | 3,4624      | 24,2368     | 5,99E-33           | 3,43E-32       |
| 55216   | GMC03   | transfer_arousal      | transfer arousal (0=prolonged freeze, 1=brief freeze, 2=none)        | score     | strain | 4,978       | 34,8457     | 6,37E-28           | 3,38E-27       |
| 55221   | GMC03   | defecation            | defecation (0=present, 1=absent)                                     | score     | strain | 0,1332      | 0,9327      | 6,10E-08           | 1,83E-07       |
| 55222   | GMC03   | urinate               | urination (0=present, 1=absent)                                      | score     | strain | 1,8366      | 12,8563     | 4,46E-10           | 1,54E-09       |
| 55224   | GMC03   | loco_activity         | total number of squares entered with all four paws in 20 min         | n         | strain | 3462,0891   | 24234,6235  | 1,43E-53           | 1,18E-52       |
| 55225   | GMC03   | bite_evidence         | evidence of biting (0=not aggressive, 1=aggressive)                  | score     | strain | 0,6804      | 4,7625      | 2,81E-16           | 1,16E-15       |
| 55226   | GMC03   | vocalization          | vocalization (0=no, 1=yes)                                           | score     | strain | 0,5108      | 3,5757      | 4,38E-14           | 1,72E-13       |
| 55233   | GMC03   | startle_response      | startle response, click box (0=no reaction, 1=Prey response)         | score     | strain | 2,5003      | 17,5019     | 1,30E-23           | 6,48E-23       |
| 55251   | GMC03   | touch_escape          | touch escape (0=no response, 1=response to touch, 2=score)           | score     | strain | 0,9292      | 6,5041      | 1,29E-26           | 6,67E-26       |
| 55301   | GMC04   | bw                    | body weight                                                          | g         | strain | 3135,5788   | 21949,0514  | 1,98E-184          | 8,46E-182      |
| 55311   | GMC04   | LatFall_1             | latency to fall from accelerating rotarod (8rpm/min)                 | s         | strain | 41157,2985  | 246943,791  | 2,52E-07           | 7,34E-07       |
| 55312   | GMC04   | LatFall_2             | latency to fall from accelerating rotarod (8rpm/min)                 | s         | strain | 46254,6166  | 277527,6993 | 3,92E-06           | 1,06E-05       |
| 55313   | GMC04   | LatFall_3             | latency to fall from accelerating rotarod (8rpm/min)                 | s         | strain | 62731,1509  | 376386,9057 | 1,88E-09           | 6,21E-09       |
| 55315   | GMC04   | LatFall_mean          | latency to fall from accelerating (8rpm/min) rotarod, mean           | s         | strain | 45849,2011  | 275095,2066 | 3,23E-11           | 1,17E-10       |
| 55401   | GMC05   | bw                    | body weight                                                          | g         | strain | 3061,5994   | 21431,1956  | 6,29E-169          | 5,37E-167      |
| 55411   | GMC05   | ASR_bn                | acoustic startle response (ASR)                                      | amplitude | strain | 160067,8341 | 1120474,839 | 5,10E-07           | 1,45E-06       |
| 55412   | GMC05   | ASR_70                | acoustic startle response (ASR)                                      | amplitude | strain | 119832,5957 | 838828,1701 | 1,34E-14           | 5,34E-14       |
| 55413   | GMC05   | ASR_80                | acoustic startle response (ASR)                                      | amplitude | strain | 288729,7712 | 2021108,398 | 4,08E-23           | 1,98E-22       |
| 55414   | GMC05   | ASR_85                | acoustic startle response (ASR)                                      | amplitude | strain | 632838,6597 | 4429870,618 | 2,53E-29           | 1,38E-28       |
| 55415   | GMC05   | ASR_90                | acoustic startle response (ASR)                                      | amplitude | strain | 2727450,113 | 19092150,79 | 1,91E-56           | 1,70E-55       |
| 55416   | GMC05   | ASR_100               | acoustic startle response (ASR)                                      | amplitude | strain | 15146862,92 | 106028040,4 | 2,36E-115          | 9,15E-114      |
| 55417   | GMC05   | ASR_110               | acoustic startle response (ASR)                                      | amplitude | strain | 21684546,66 | 151791826,6 | 1,14E-116          | 4,88E-115      |
| 55418   | GMC05   | ASR_120               | acoustic startle response (ASR)                                      | amplitude | strain | 22979172,59 | 160854208,2 | 3,90E-125          | 1,85E-123      |
| 55421   | GMC05   | ASR_PP_67             | acoustic startle response (ASR), 110 db sound pressure               | amplitude | strain | 14495924,18 | 101471469,2 | 2,39E-84           | 3,92E-83       |
| 55422   | GMC05   | ASR_PP_69             | acoustic startle response (ASR), 110 db sound pressure               | amplitude | strain | 14375570    | 100628990   | 2,40E-86           | 4,37E-85       |
| 55423   | GMC05   | ASR_PP_73             | acoustic startle response (ASR), 110 db sound pressure               | amplitude | strain | 13466872,13 | 94268104,9  | 3,48E-81           | 5,03E-80       |
| 55424   | GMC05   | ASR_PP_81             | acoustic startle response (ASR), 110 db sound pressure               | amplitude | strain | 7523466,296 | 52664264,07 | 8,16E-79           | 1,12E-77       |
| 55431   | GMC05   | PPI_67                | percent prepulse inhibition (PPI), 110 db sound pressure             | %         | strain | 11997,6596  | 83983,617   | 1,83E-22           | 8,63E-22       |
| 55432   | GMC05   | PPI_69                | percent prepulse inhibition (PPI), 110 db sound pressure             | %         | strain | 16837,5578  | 117862,9048 | 5,12E-38           | 3,14E-37       |
| 55433   | GMC05   | PPI_73                | percent prepulse inhibition (PPI), 110 db sound pressure             | %         | strain | 20897,1144  | 146279,8008 | 3,48E-31           | 1,96E-30       |
| 55434   | GMC05   | PPI_81                | percent prepulse inhibition (PPI), 110 db sound pressure             | %         | strain | 17519,3472  | 122635,4303 | 1,05E-41           | 6,75E-41       |
| 55435   | GMC05   | PPI_global            | percentage prepulse inhibition (PPI) evoked by 110 db                | %         | strain | 16071,3141  | 112499,199  | 1,69E-38           | 1,05E-37       |
| 55441   | GMC05   | ASR_ISI_5             | acoustic startle response (ASR)                                      | amplitude | strain | 12346120,16 | 86422841,15 | 2,05E-81           | 3,07E-80       |
| 55442   | GMC05   | ASR_ISI_25            | acoustic startle response (ASR)                                      | amplitude | strain | 13602111,1  | 95214777,72 | 1,41E-91           | 3,16E-90       |
| 55443   | GMC05   | ASR_ISI_100           | acoustic startle response (ASR)                                      | amplitude | strain | 17049324,56 | 119345271,9 | 3,94E-106          | 1,12E-104      |
| 55451   | GMC05   | PPI_ISI_5             | prepulse inhibition (PPI)                                            | %         | strain | 19527,0646  | 136689,4524 | 1,72E-43           | 1,16E-42       |
| 55452   | GMC05   | PPI_ISI_25            | prepulse inhibition (PPI)                                            | %         | strain | 18819,4799  | 131736,3595 | 3,24E-32           | 1,84E-31       |
| 55453   | GMC05   | PPI_ISI_100           | prepulse inhibition (PPI)                                            | %         | strain | 9874,2354   | 69119,6477  | 1,02E-22           | 4,84E-22       |
| 55501   | GMC06   | bw_before_fast        | body weight                                                          | g         | strain | 2515,6699   | 17609,689   | 9,43E-122          | 4,24E-120      |
| 55502   | GMC06   | bw_after_fast         | body weight                                                          | g         | strain | 2849,3597   | 11397,4389  | 8,42E-94           | 2,05E-92       |
| 55511   | GMC06   | GLU                   | glucose (plasma GLU, 16h fast)                                       | mmol/L    | strain | 192,5128    | 770,0512    | 1,44E-35           | 8,51E-35       |
| 55512   | GMC06   | Glycerol              | glycerol (plasma, 16h fast)                                          | mmol/L    | strain | 0,0431      | 0,1726      | 8,29E-06           | 2,19E-05       |
| 55521   | GMC06   | CHOL                  | total cholesterol (plasma CHOL, 16h fast)                            | mmol/L    | strain | 76,8812     | 307,5248    | 2,01E-80           | 2,86E-79       |
| 55522   | GMC06   | HDL                   | HDL cholesterol (plasma HDL, 16h fast)                               | mmol/L    | strain | 24,394      | 97,5759     | 2,76E-81           | 4,06E-80       |

|       |       |                     |                                                                     |                   |        |             |             |             |             |
|-------|-------|---------------------|---------------------------------------------------------------------|-------------------|--------|-------------|-------------|-------------|-------------|
| 55523 | GMC06 | nonHDL              | non-HDL cholesterol (plasma non-HDL) (CHOL minus                    | mmol/L            | strain | 16,0066     | 64,0263     | 6,00E-57    | 5,45E-56    |
| 55524 | GMC06 | NEFA                | non-esterified fatty acids (plasma NEFA, 16h fast)                  | mmol/L            | strain | 0,489       | 1,9561      | 0,02133978  | 0,035682736 |
| 55525 | GMC06 | TG                  | triglyceride (plasma TG, 16h fast)                                  | mmol/L            | strain | 5,4368      | 21,7472     | 1,08E-09    | 3,62E-09    |
| 55601 | GMC07 | bw                  | body weight                                                         | g                 | strain | 3917,3538   | 27421,4764  | 1,01E-179   | 1,23E-177   |
| 55612 | GMC07 | latency_2           | latency of nociceptive response to hot plate                        | s                 | strain | 699,6954    | 4897,8678   | 2,54E-23    | 1,25E-22    |
| 55621 | GMC07 | response_1          | type of response to hot plate, first reaction (0=no rea designation |                   | strain | 1,0402      | 7,2814      | 0,001678501 | 0,003437506 |
| 55622 | GMC07 | response_2          | type of response to hot plate, second reaction (0=no designation    |                   | strain | 6,2056      | 43,4391     | 3,84E-09    | 1,23E-08    |
| 55701 | GMC08 | TEWL_adj            | transepidermal water loss, normalized                               | g/m<sup>2</sup>/h | strain | 762,1762    | 5335,2336   | 1,08E-19    | 4,67E-19    |
| 55702 | GMC08 | TEWL_CV             | coefficient of variation of transepidermal water loss               | %                 | strain | 0,2328      | 1,6299      | 1,68E-05    | 4,34E-05    |
| 55801 | GMC09 | bw_before           | body weight before testing                                          | g                 | strain | 4073,712    | 28515,9837  | 1,31E-181   | 3,72E-179   |
| 55802 | GMC09 | bw_after            | body weight after testing                                           | g                 | strain | 3876,966    | 27138,7617  | 5,98E-180   | 8,51E-178   |
| 55811 | GMC09 | food                | total food intake, 21 h test                                        | g                 | strain | 22,1204     | 154,843     | 4,57E-37    | 2,73E-36    |
| 55821 | GMC09 | water               | total water consumption, 21 h test                                  | mL                | strain | 59,6813     | 417,7693    | 1,73E-07    | 5,08E-07    |
| 55831 | GMC09 | VO2_mean            | mean oxygen consumption, 21 h test, 15 min bins                     | mL/h              | strain | 9067,0945   | 63469,6616  | 1,58E-88    | 3,29E-87    |
| 55832 | GMC09 | VO2_mean            | mean carbon dioxide production, 21 h test, 15 min bins              | mL/h              | strain | 7450,7249   | 52155,0743  | 5,63E-85    | 9,43E-84    |
| 55833 | GMC09 | RER_mean            | mean respiratory exchange rate, 21 h test, 15 min bins              | ratio             | strain | 0,061       | 0,427       | 1,99E-10    | 6,99E-10    |
| 55841 | GMC09 | heat_mean           | mean heat production, 21 h test, 15 min bins                        | kJ/h              | strain | 3,8539      | 26,9772     | 9,71E-90    | 2,07E-88    |
| 55851 | GMC09 | breaks_X_mean       | mean total beam breaks on X-axis, 21 h test, 15 min bins            | n                 | strain | 7264940,08  | 50854580,56 | 3,19E-07    | 9,13E-07    |
| 55852 | GMC09 | breaks_XA_mean      | mean ambulatory movement on X-axis, 21 h test, 15 min bins          | n                 | strain | 5464960,233 | 38254721,63 | 7,07E-07    | 2,00E-06    |
| 55853 | GMC09 | breaks_XF_mean      | mean fine movement on X-axis, 21 h test, 15 min bins                | n                 | strain | 157968,1529 | 1105777,071 | 2,31E-10    | 8,10E-10    |
| 55854 | GMC09 | breaks_YA_mean      | mean ambulatory movement on Y-axis, 21 h test, 15 min bins          | n                 | strain | 5776133,24  | 40432932,68 | 2,44E-18    | 1,04E-17    |
| 55855 | GMC09 | breaks_YF_mean      | mean fine movement on Y-axis, 21 h test, 15 min bins                | n                 | strain | 243131,2614 | 1701918,83  | 5,76E-26    | 2,96E-25    |
| 55856 | GMC09 | breaks_Z_mean       | mean rearing movement on Z-axis, 21 h test, 15 min bins             | n                 | strain | 166454,3814 | 1165180,67  | 5,98E-24    | 2,99E-23    |
| 55857 | GMC09 | distance_mean       | mean distance traveled, 21 h test, 15 min bins                      | cm                | strain | 118809854,8 | 831668983,8 | 7,90E-10    | 2,70E-09    |
| 55858 | GMC09 | speed_mean          | mean speed traveled, 21 h test, 15 min bins                         | cm/s              | strain | 146,8586    | 1028,0103   | 8,01E-10    | 2,72E-09    |
| 55901 | GMC10 | bw_13wk             | body weight                                                         | g                 | strain | 3985,2748   | 27896,9233  | 7,94E-190   | 6,78E-187   |
| 55902 | GMC10 | bw_19wk             | body weight                                                         | g                 | strain | 4649,7837   | 32548,4859  | 1,91E-144   | 1,09E-142   |
| 55911 | GMC10 | fat_13wk            | fat tissue mass, whole body with head (NMR)                         | g                 | strain | 799,7912    | 5598,5383   | 2,03E-169   | 1,93E-167   |
| 55912 | GMC10 | fat_19wk            | fat tissue mass, whole body with head (NMR)                         | g                 | strain | 1040,448    | 7283,1362   | 1,19E-147   | 7,27E-146   |
| 55921 | GMC10 | lean_13wk           | lean tissue mass, whole body with head (NMR)                        | g                 | strain | 675,9641    | 4731,7485   | 3,02E-158   | 2,15E-156   |
| 55922 | GMC10 | lean_19wk           | lean tissue mass, whole body with head (NMR)                        | g                 | strain | 645,4838    | 4518,3865   | 5,40E-116   | 2,20E-114   |
| 56001 | GMC11 | bw_before_fast      | body weight                                                         | g                 | strain | 4042,8615   | 28300,0308  | 1,71E-171   | 1,83E-169   |
| 56002 | GMC11 | bw_after_fast       | body weight                                                         | g                 | strain | 3636,0816   | 18180,4081  | 1,44E-111   | 4,92E-110   |
| 56011 | GMC11 | GLU_0               | intraperitoneal glucose tolerance test (20% glucose i               | mmol/L            | strain | 28,5697     | 114,2789    | 5,77E-08    | 1,74E-07    |
| 56012 | GMC11 | GLU_15              | intraperitoneal glucose tolerance test (20% glucose i               | mmol/L            | strain | 484,801     | 1939,2042   | 2,33E-21    | 1,07E-20    |
| 56013 | GMC11 | GLU_30              | intraperitoneal glucose tolerance test (20% glucose i               | mmol/L            | strain | 596,4481    | 2385,7923   | 8,79E-23    | 4,19E-22    |
| 56014 | GMC11 | GLU_60              | intraperitoneal glucose tolerance test (20% glucose i               | mmol/L            | strain | 1139,334    | 4557,3361   | 4,93E-35    | 2,91E-34    |
| 56015 | GMC11 | GLU_120             | intraperitoneal glucose tolerance test (20% glucose i               | mmol/L            | strain | 1382,9635   | 5531,8539   | 3,08E-48    | 2,27E-47    |
| 56101 | GMC12 | bw                  | body weight                                                         | g                 | strain | 3513,6486   | 24595,5399  | 4,81E-141   | 2,57E-139   |
| 56111 | GMC12 | resp_rate           | respiration rate                                                    | n/min             | strain | 80659,2819  | 564614,9733 | 8,02E-09    | 2,50E-08    |
| 56112 | GMC12 | heart_rate          | heart rate, beats per min                                           | n/min             | strain | 580765,9885 | 4065361,92  | 9,59E-43    | 6,40E-42    |
| 56121 | GMC12 | LV_mass             | left ventricular mass corrected                                     | mg                | strain | 2064,2161   | 14449,5127  | 1,66E-41    | 1,06E-40    |
| 56122 | GMC12 | fract_shortening    | fractional shortening                                               | %                 | strain | 3784,817    | 26493,7192  | 4,67E-34    | 2,73E-33    |
| 56123 | GMC12 | EJ_fraction         | ejection fraction                                                   | %                 | strain | 2386,9274   | 16708,4915  | 1,02E-45    | 7,17E-45    |
| 56124 | GMC12 | stroke_vol          | stroke volume, volume of blood pumped from one ve                   | &micro;l          | strain | 2560,8566   | 17925,9959  | 4,92E-42    | 3,21E-41    |
| 56125 | GMC12 | cardiac_output      | cardiac output, volume of blood pumped by the hear                  | mL/min            | strain | 550,8203    | 3855,742    | 1,64E-37    | 9,91E-37    |
| 56131 | GMC12 | IVS_diastole        | interventricular septum                                             | mm                | strain | 0,032       | 0,2238      | 2,43E-11    | 8,95E-11    |
| 56132 | GMC12 | IVS_systole         | interventricular septum                                             | mm                | strain | 0,0355      | 0,2483      | 2,35E-14    | 9,29E-14    |
| 56133 | GMC12 | LVID_diastole       | left ventricular internal dimension                                 | mm                | strain | 8,5324      | 59,727      | 9,11E-46    | 6,43E-45    |
| 56134 | GMC12 | LVID_systole        | left ventricular internal dimension                                 | mm                | strain | 7,1211      | 49,8476     | 1,34E-39    | 8,37E-39    |
| 56135 | GMC12 | LVPW_diastole       | left ventricular posterior wall width                               | mm                | strain | 0,0174      | 0,1221      | 0,000576219 | 0,001284833 |
| 56136 | GMC12 | LVPW_systole        | left ventricular posterior wall width                               | mm                | strain | 0,03        | 0,2099      | 2,78E-07    | 8,00E-07    |
| 56201 | GMC13 | HR                  | heart rate, beats per min                                           | n/min             | strain | 67740,7081  | 338703,5407 | 1,19E-26    | 6,18E-26    |
| 56202 | GMC13 | HR_V                | heart rate variability, mean of differences between s               | n/min             | strain | 8573,4623   | 42867,3115  | 0,011913809 | 0,021196651 |
| 56203 | GMC13 | HR_CV               | heart rate coefficient of variation (signal intensity)              | %                 | strain | 137,257     | 686,2852    | 0,008275366 | 0,015107384 |
| 56211 | GMC13 | RR                  | duration of RR interval                                             | ms                | strain | 742,5912    | 3712,9561   | 6,17E-26    | 3,15E-25    |
| 56212 | GMC13 | PQ                  | duration of PQ interval                                             | ms                | strain | 114,6475    | 573,2376    | 1,88E-09    | 6,21E-09    |
| 56213 | GMC13 | PR                  | duration of PR interval                                             | ms                | strain | 120,8357    | 604,1784    | 3,92E-08    | 1,19E-07    |
| 56214 | GMC13 | QRS                 | duration of QRS interval                                            | ms                | strain | 9,6748      | 48,3741     | 6,88E-06    | 1,82E-05    |
| 56215 | GMC13 | QT                  | duration of QT interval                                             | ms                | strain | 128,0051    | 640,0257    | 2,55E-07    | 7,37E-07    |
| 56216 | GMC13 | ST                  | duration of ST interval                                             | ms                | strain | 120,3356    | 601,6778    | 7,79E-07    | 2,20E-06    |
| 56217 | GMC13 | QTc                 | duration of QTc interval, calculated by dividing QT in              | ms                | strain | 33,6175     | 168,0877    | 0,022988067 | 0,038120018 |
| 56231 | GMC13 | SR_amplitude        | mean SR amplitude, mean amplitude of signal measur                  | mV                | strain | 2,9621      | 14,8104     | 4,22E-06    | 1,14E-05    |
| 56232 | GMC13 | R_amplitude         | mean R amplitude, mean amplitude of signal measur                   | mV                | strain | 1,21        | 6,05        | 9,49E-07    | 2,65E-06    |
| 56242 | GMC13 | pNNS0               | proportion of number of pairs of successive beat-to-t               | %                 | strain | 623,1029    | 3115,5145   | 0,021488965 | 0,03571598  |
| 56301 | GMC14 | bw                  | body weight                                                         | g                 | strain | 3683,6771   | 25785,7398  | 6,92E-136   | 3,48E-134   |
| 56302 | GMC14 | body_length         | body length                                                         | mm                | strain | 1894,3776   | 13260,6434  | 4,51E-73    | 5,83E-72    |
| 56321 | GMC14 | eye_length_L        | eye axial length                                                    | mm                | strain | 0,4223      | 2,9558      | 1,83E-54    | 1,58E-53    |
| 56322 | GMC14 | eye_length_R        | eye axial length                                                    | mm                | strain | 0,3064      | 2,1445      | 2,78E-66    | 3,16E-65    |
| 56331 | GMC14 | lens_min_density_L  | minimal density value of lens, Scheimpflug imaging                  | %                 | strain | 50,9094     | 356,3659    | 2,32E-58    | 2,31E-57    |
| 56332 | GMC14 | lens_min_density_R  | minimal density value of lens, Scheimpflug imaging                  | %                 | strain | 59,0222     | 413,1557    | 4,10E-51    | 3,18E-50    |
| 56333 | GMC14 | lens_max_density_L  | maximal density value of lens, Scheimpflug imaging                  | %                 | strain | 65,3661     | 457,5629    | 1,40E-05    | 3,64E-05    |
| 56334 | GMC14 | lens_max_density_R  | maximal density value of lens, Scheimpflug imaging                  | %                 | strain | 74,6054     | 522,2376    | 2,47E-11    | 9,06E-11    |
| 56335 | GMC14 | lens_mean_density_L | mean density value of lens, Scheimpflug imaging                     | %                 | strain | 54,6459     | 382,5215    | 6,42E-49    | 4,85E-48    |
| 56336 | GMC14 | lens_mean_density_R | mean density value of lens, Scheimpflug imaging                     | %                 | strain | 66,9476     | 468,6331    | 1,69E-44    | 1,15E-43    |
| 56341 | GMC14 | fundus_vessels_L    | number of main vessels in fundus                                    | n                 | strain | 35,9864     | 251,9046    | 5,58E-14    | 2,19E-13    |
| 56342 | GMC14 | fundus_vessels_R    | number of main vessels in fundus                                    | n                 | strain | 34,543      | 241,801     | 1,61E-11    | 5,99E-11    |
| 56351 | GMC14 | retinal_thickness_L | retinal thickness, optical coherence tomography                     | &micro;m          | strain | 2901,6374   | 20311,4621  | 3,15E-21    | 1,43E-20    |
| 56352 | GMC14 | retinal_thickness_R | retinal thickness, optical coherence tomography                     | &micro;m          | strain | 2524,0809   | 17668,566   | 1,48E-17    | 6,17E-17    |
| 56401 | GMC15 | WBC                 | white blood cell count (WBC; per volume x 10<sup>3</sup>            | n/&micro;l        | strain | 58,3339     | 408,3372    | 1,77E-14    | 7,03E-14    |
| 56404 | GMC15 | RBC                 | red blood cell count (RBC; per volume x 10<sup>6</sup>              | n/&micro;l        | strain | 22,614      | 158,2981    | 1,02E-20    | 4,50E-20    |
| 56406 | GMC15 | RDW                 | RBC corpuscular distribution width (RDW)                            | %                 | strain | 19,292      | 135,0439    | 1,19E-13    | 4,61E-13    |
| 56408 | GMC15 | MCV                 | mean RBC corpuscular volume (MCV)                                   | fL                | strain | 185,6126    | 1299,2879   | 6,86E-31    | 3,83E-30    |
| 56412 | GMC15 | MCH                 | calculated mean RBC corpuscular hemoglobin conten                   | pg                | strain | 12,4723     | 87,3063     | 2,99E-27    | 1,58E-26    |
| 56414 | GMC15 | MCHC                | calculated mean RBC corpuscular hemoglobin concen                   | g/dL              | strain | 21,57       | 150,9898    | 6,43E-21    | 2,88E-20    |
| 56416 | GMC15 | HGB                 | hemoglobin (HGB)                                                    | g/dL              | strain | 32,5826     | 228,078     | 1,14E-13    | 4,43E-13    |
| 56421 | GMC15 | HCT                 | hematocrit (HCT)                                                    | %                 | strain | 374,1468    | 2619,0273   | 1,71E-17    | 7,08E-17    |
| 56431 | GMC15 | PLT                 | platelet count (PLT; units per volume x 10<sup>3</sup>              | su n/&micro;l     | strain | 840065,6231 | 5880459,362 | 3,83E-13    | 1,48E-12    |
| 56434 | GMC15 | MPV                 | mean platelet volume (MPV)                                          | fL                | strain | 7,1053      | 49,7372     | 2,37E-48    | 1,76E-47    |
| 56436 | GMC15 | PDW                 | platelet corpuscular distribution width (PDW)                       | fL                | strain | 12,5947     | 88,1627     | 1,54E-40    | 9,76E-40    |
| 56438 | GMC15 | PLCR                | platelet large cell ratio (PLCR)                                    | %                 | strain | 50,7898     | 355,5287    | 2,07E-15    | 8,34E-15    |
| 56441 | GMC15 | PCT                 | plateletcrit (PCT)                                                  | %                 | strain | 0,5732      | 4,0122      | 2,67E-21    | 1,22E-20    |
| 56501 | GMC16 | bw_17               | body weight                                                         | g                 | strain | 1071,6894   | 4286,7575   | 3,85E-21    | 1,73E-20    |
| 56502 | GMC16 | bw_21               | body weight                                                         | g                 | strain | 3955,5776   | 27689,0432  | 8,85E-86    | 1,54E-84    |

|       |       |                       |                                                         |                  |          |             |             |             |             |
|-------|-------|-----------------------|---------------------------------------------------------|------------------|----------|-------------|-------------|-------------|-------------|
| 56510 | GMC16 | calcium_17            | calcium (plasma Ca)                                     | mmol/L           | strain   | 0,0432      | 0,1727      | 5,59E-05    | 0,000136754 |
| 56511 | GMC16 | calcium_21            | calcium (plasma Ca)                                     | mmol/L           | strain   | 0,1014      | 0,7097      | 1,63E-11    | 6,04E-11    |
| 56512 | GMC16 | chloride_17           | chloride (plasma Cl)                                    | mmol/L           | strain   | 56,6383     | 226,5533    | 2,18E-07    | 6,37E-07    |
| 56513 | GMC16 | chloride_21           | chloride (plasma Cl)                                    | mmol/L           | strain   | 158,9034    | 1112,324    | 6,39E-20    | 2,77E-19    |
| 56514 | GMC16 | iron_17               | iron (plasma Fe)                                        | &micro;mol/L     | strain   | 317,3081    | 1269,2324   | 2,85E-10    | 9,88E-10    |
| 56515 | GMC16 | iron_21               | iron (plasma Fe)                                        | &micro;mol/L     | strain   | 664,6469    | 4652,5286   | 1,02E-28    | 5,42E-28    |
| 56518 | GMC16 | lactate_17            | lactate (plasma)                                        | mmol/L           | strain   | 28,943      | 115,7722    | 2,07E-07    | 6,07E-07    |
| 56519 | GMC16 | lactate_21            | lactate (plasma)                                        | mmol/L           | strain   | 135,946     | 951,6223    | 2,56E-23    | 1,25E-22    |
| 56520 | GMC16 | phosphate_17          | phosphorus (plasma phosphate)                           | mmol/L           | strain   | 0,7571      | 3,0285      | 0,000130653 | 0,0003108   |
| 56521 | GMC16 | phosphate_21          | phosphorus (plasma phosphate)                           | mmol/L           | strain   | 3,8849      | 27,1942     | 1,22E-20    | 5,37E-20    |
| 56523 | GMC16 | potassium_21          | potassium (plasma K)                                    | mmol/L           | strain   | 0,3826      | 2,6781      | 0,029497861 | 0,048537906 |
| 56524 | GMC16 | sodium_17             | sodium (plasma Na)                                      | mmol/L           | strain   | 50,9811     | 203,9245    | 0,00014116  | 0,000333935 |
| 56525 | GMC16 | sodium_21             | sodium (plasma Na)                                      | mmol/L           | strain   | 94,848      | 663,9358    | 2,17E-09    | 7,12E-09    |
| 56526 | GMC16 | ALP_17                | alkaline phosphatase (plasma ALP)                       | IU/L             | strain   | 5241,1      | 20964,4     | 2,56E-06    | 6,96E-06    |
| 56527 | GMC16 | ALP_21                | alkaline phosphatase (plasma ALP)                       | IU/L             | strain   | 11651,972   | 81563,804   | 2,55E-07    | 7,37E-07    |
| 56529 | GMC16 | ALT_21                | alanine transaminase (plasma ALT)                       | IU/L             | strain   | 1962,0487   | 13734,3406  | 0,021496503 | 0,03571598  |
| 56530 | GMC16 | AST_17                | aspartate transaminase (plasma AST)                     | IU/L             | strain   | 2711,9531   | 10847,8123  | 0,001150111 | 0,002407341 |
| 56531 | GMC16 | AST_21                | aspartate transaminase (plasma AST)                     | IU/L             | strain   | 19806,2053  | 138643,4369 | 3,65E-06    | 9,89E-06    |
| 56533 | GMC16 | LDH_21                | lactic acid dehydrogenase (plasma LDH)                  | IU/L             | strain   | 22672,9368  | 158710,5579 | 0,007087513 | 0,01310116  |
| 56534 | GMC16 | amylase_17            | alpha-amylase (plasma)                                  | IU/L             | strain   | 99355,3564  | 397421,4255 | 1,04E-06    | 2,89E-06    |
| 56535 | GMC16 | amylase_21            | alpha-amylase (plasma)                                  | IU/L             | strain   | 619587,8773 | 4337115,141 | 4,42E-45    | 3,07E-44    |
| 56537 | GMC16 | GLU_21                | glucose (plasma GLU)                                    | mmol/L           | strain   | 274,2673    | 1919,8708   | 4,37E-06    | 1,17E-05    |
| 56538 | GMC16 | albumin_17            | albumin (plasma Alb)                                    | g/L              | strain   | 25,0491     | 100,1965    | 0,000855371 | 0,001826218 |
| 56539 | GMC16 | albumin_21            | albumin (plasma Alb)                                    | g/L              | strain   | 176,9878    | 1238,9143   | 6,21E-29    | 3,34E-28    |
| 56540 | GMC16 | creatinine_17         | creatinine (plasma)                                     | &micro;mol/L     | strain   | 23,7869     | 95,1474     | 0,000163361 | 0,00038327  |
| 56542 | GMC16 | total_protein_17      | total protein (plasma TP)                               | g/L              | strain   | 23,9566     | 95,8265     | 0,002707826 | 0,00535297  |
| 56543 | GMC16 | total_protein_21      | total protein (plasma TP)                               | g/L              | strain   | 273,999     | 1917,9931   | 3,07E-30    | 1,69E-29    |
| 56544 | GMC16 | urea_17               | blood urea nitrogen (plasma BUN)                        | mmol/L           | strain   | 11,8332     | 47,3327     | 0,000789656 | 0,001707257 |
| 56545 | GMC16 | urea_21               | blood urea nitrogen (plasma BUN)                        | mmol/L           | strain   | 98,0107     | 686,0751    | 1,92E-29    | 1,05E-28    |
| 56546 | GMC16 | CHOL_17               | total cholesterol (plasma CHOL)                         | mmol/L           | strain   | 11,7623     | 47,0491     | 1,48E-06    | 4,09E-06    |
| 56547 | GMC16 | CHOL_21               | total cholesterol (plasma CHOL)                         | mmol/L           | strain   | 47,7013     | 333,9088    | 5,37E-78    | 7,16E-77    |
| 56548 | GMC16 | TG_17                 | triglyceride (plasma TG)                                | mmol/L           | strain   | 8,7387      | 34,9547     | 5,68E-06    | 1,52E-05    |
| 56549 | GMC16 | TG_21                 | triglyceride (plasma TG)                                | mmol/L           | strain   | 13,6189     | 95,3321     | 3,59E-21    | 1,62E-20    |
| 56601 | GMC17 | bw                    | body weight                                             | g                | strain   | 4115,2615   | 24691,5691  | 8,52E-102   | 2,27E-100   |
| 56611 | GMC17 | click                 | auditory brainstem response (ABR) threshold, sound      | dB               | strain   | 21052,1216  | 126312,7299 | 1,92E-51    | 1,50E-50    |
| 56612 | GMC17 | pip_6                 | auditory brainstem response (ABR) threshold, sound      | dB               | strain   | 11665,3816  | 69992,2894  | 3,14E-37    | 1,89E-36    |
| 56613 | GMC17 | pip_12                | auditory brainstem response (ABR) threshold, sound      | dB               | strain   | 29662,573   | 177975,4379 | 9,25E-51    | 7,12E-50    |
| 56614 | GMC17 | pip_18                | auditory brainstem response (ABR) threshold, sound      | dB               | strain   | 27091,7735  | 162550,6407 | 6,24E-53    | 5,03E-52    |
| 56615 | GMC17 | pip_24                | auditory brainstem response (ABR) threshold, sound      | dB               | strain   | 17504,7244  | 105028,3467 | 9,22E-38    | 5,63E-37    |
| 56616 | GMC17 | pip_30                | auditory brainstem response (ABR) threshold, sound      | dB               | strain   | 9464,2429   | 56785,4575  | 3,03E-27    | 1,59E-26    |
| 56701 | GMC18 | bw                    | body weight                                             | g                | strain   | 4215,2567   | 25291,5401  | 3,00E-103   | 8,26E-102   |
| 56702 | GMC18 | body_length           | body length                                             | cm               | strain   | 10,9435     | 43,7741     | 3,54E-62    | 3,78E-61    |
| 56711 | GMC18 | body_size             | body size (1=small, 2=normal, 3=big)                    | designation      | strain   | 7,8451      | 47,0703     | 7,28E-46    | 5,18E-45    |
| 56712 | GMC18 | body_type             | body type (1=emaciated, 2=slender, 3=normal, 4=puc)     | designation      | strain   | 19,697      | 118,1822    | 3,22E-56    | 2,84E-55    |
| 56721 | GMC18 | FATmass_Xhead         | fat tissue mass, without head                           | g                | strain   | 5263,5359   | 21054,1437  | 9,26E-72    | 1,16E-70    |
| 56722 | GMC18 | LEANmass_Xhead        | lean tissue mass, without head                          | g                | strain   | 215,125     | 860,5001    | 7,01E-25    | 3,52E-24    |
| 56723 | GMC18 | SOFTmass_Xhead        | total soft tissue mass, without head                    | g                | strain   | 4387,3819   | 17549,5276  | 6,47E-87    | 1,20E-85    |
| 56724 | GMC18 | BMD_Xhead             | bone mineral density (BMD), without head                | g/cm<sup>2</sup> | strain   | 0,0017      | 0,0066      | 1,32E-31    | 7,45E-31    |
| 56725 | GMC18 | bone_area_Xhead       | bone area, without head                                 | cm<sup>2</sup>   | strain   | 933,7259    | 3734,9036   | 2,61E-58    | 2,56E-57    |
| 56726 | GMC18 | bone_mass_Xhead       | bone mass, without head                                 | g                | strain   | 5,0552      | 20,2208     | 2,96E-68    | 3,56E-67    |
| 56731 | GMC18 | BMD_wholebody         | bone mineral density (BMD), whole body including head   | g/cm<sup>2</sup> | strain   | 0,0018      | 0,007       | 1,23E-25    | 6,24E-25    |
| 56732 | GMC18 | FATmass_wholebody     | fat tissue mass, whole body including head              | g                | strain   | 6068,6065   | 24274,4261  | 7,08E-72    | 9,02E-71    |
| 56733 | GMC18 | LEANmass_wholebody    | lean tissue mass, whole body including head             | g                | strain   | 327,706     | 1310,8241   | 5,04E-29    | 2,72E-28    |
| 56734 | GMC18 | SOFTmass_wholebody    | total soft tissue mass, whole body including head       | g                | strain   | 4726,8171   | 18907,2684  | 6,51E-86    | 1,16E-84    |
| 56735 | GMC18 | bone_area_wholebody   | bone area, whole body including head                    | cm<sup>2</sup>   | strain   | 1054,2805   | 4217,1219   | 5,19E-58    | 4,81E-57    |
| 56736 | GMC18 | bone_mass_wholebody   | bone mass, whole body including head                    | g                | strain   | 7,3012      | 29,2048     | 2,39E-70    | 2,96E-69    |
| 56741 | GMC18 | lumbar_num            | number of lumbar vertebrae                              | n                | strain   | 0,8149      | 4,8891      | 3,87E-11    | 1,40E-10    |
| 56801 | GMC19 | bw                    | body weight                                             | g                | strain   | 673,6652    | 4715,6562   | 4,78E-16    | 1,94E-15    |
| 56813 | GMC19 | forced_expiratory_vol | forced expiratory volume expired in first 100 ms of fa  | mL               | strain   | 0,1623      | 0,6491      | 2,17E-05    | 5,56E-05    |
| 56821 | GMC19 | lung_capacity         | total lung capacity (TLC), volume in the lungs at maxi  | mL               | strain   | 0,154       | 0,7698      | 5,74E-06    | 1,53E-05    |
| 56822 | GMC19 | vital_capacity        | vital capacity (VC), volume of air breathed out after d | mL               | strain   | 0,1702      | 0,8511      | 2,62E-05    | 6,64E-05    |
| 56823 | GMC19 | forced_capacity       | forced vital capacity (FVC), volume expired during fas  | mL               | strain   | 0,1679      | 0,6717      | 6,33E-05    | 0,000153919 |
| 56824 | GMC19 | inspiratory_capacity  | inspiratory capacity (IC), volume inspired during slow  | mL               | strain   | 0,111       | 0,4441      | 0,000426433 | 0,000955837 |
| 56831 | GMC19 | chord_compliance      | lung compliance (chord compliance) (H<sub>2</sub>=mL/cm | strain           | 7,00E-04 | 0,0036      | 0,000222739 | 0,000511341 |             |
| 56832 | GMC19 | dynamic_compliance    | dynamic compliance (C) of respiratory system with br    | mL/cm            | strain   | 1,00E-04    | 8,00E-04    | 1,64E-05    | 4,26E-05    |
| 56841 | GMC19 | resistance            | respiratory system resistance (H<sub>2</sub>=cm/mL/s    | strain           | 0,2291   | 1,6037      | 0,001552103 | 0,003186288 |             |
| 56842 | GMC19 | peak_flow             | peak expiratory flow (PEF)                              | mL/s             | strain   | 38,1327     | 152,5307    | 0,000853758 | 0,001826218 |
| 56902 | GMC20 | IgM_17                | immunoglobulin M (plasma IgM)                           | &micro;g/mL      | strain   | 736877,2387 | 2947508,955 | 1,09E-06    | 3,02E-06    |
| 56903 | GMC20 | IgM_21                | immunoglobulin M (plasma IgM)                           | &micro;g/mL      | strain   | 938117,2765 | 6566820,935 | 1,65E-12    | 6,28E-12    |
| 56904 | GMC20 | IgA_17                | immunoglobulin A (plasma IgA)                           | &micro;g/mL      | strain   | 894501,5894 | 3578006,358 | 1,30E-05    | 3,40E-05    |
| 56908 | GMC20 | IgG2a_17              | immunoglobulin G2a (plasma IgG2a)                       | &micro;g/mL      | strain   | 181533,3944 | 726133,5777 | 0,002960654 | 0,00581241  |
| 56909 | GMC20 | IgG2a_21              | immunoglobulin G2a (plasma IgG2a)                       | &micro;g/mL      | strain   | 657937,5998 | 4605563,199 | 6,56E-07    | 1,86E-06    |
| 56910 | GMC20 | IgG2b_17              | immunoglobulin G2b (plasma IgG2b)                       | &micro;g/mL      | strain   | 17699,5568  | 53098,6704  | 0,000998942 | 0,002111624 |
| 56911 | GMC20 | IgG2b_21              | immunoglobulin G2b (plasma IgG2b)                       | &micro;g/mL      | strain   | 228075,0909 | 912300,3635 | 1,94E-12    | 7,32E-12    |
| 56912 | GMC20 | IgG3_17               | immunoglobulin G3 (plasma IgG3)                         | &micro;g/mL      | strain   | 80326,8812  | 240980,6435 | 0,000622119 | 0,001379973 |
| 56914 | GMC20 | IgE_17                | immunoglobulin E (plasma IgE)                           | ng/mL            | strain   | 1671902,522 | 6687610,088 | 0,014713648 | 0,025748884 |
| 56915 | GMC20 | IgE_21                | immunoglobulin E (plasma IgE)                           | ng/mL            | strain   | 9835432,493 | 68848027,45 | 7,89E-18    | 3,32E-17    |
| 56916 | GMC20 | adNA_17               | anti-DNA autoantibodies (plasma)                        | strain           | 0,072    | 0,2882      | 8,37E-19    | 3,57E-18    |             |
| 56917 | GMC20 | adNA_21               | anti-DNA autoantibodies (plasma)                        | strain           | 1,7255   | 12,0783     | 1,33E-33    | 7,76E-33    |             |
| 56918 | GMC20 | RF_17                 | rheumatoid factor (plasma RF)                           | strain           | 0,0155   | 0,062       | 2,92E-08    | 8,91E-08    |             |
| 56919 | GMC20 | RF_21                 | rheumatoid factor (plasma RF)                           | strain           | 0,3125   | 2,1877      | 2,69E-18    | 1,14E-17    |             |
| 57001 | GMC21 | bw                    | body weight                                             | g                | strain   | 3787,8533   | 26514,9728  | 2,51E-90    | 5,49E-89    |
| 57021 | GMC21 | heart_wt              | heart weight                                            | mg               | strain   | 29931,2511  | 209518,7575 | 3,00E-47    | 2,17E-46    |
| 57022 | GMC21 | liver_wt              | liver weight                                            | g                | strain   | 9,416       | 65,912      | 1,24E-85    | 2,13E-84    |
| 57023 | GMC21 | spleen_wt             | spleen weight                                           | g                | strain   | 0,0366      | 0,256       | 8,58E-63    | 9,28E-62    |
