# Supplementary material for: A comprehensive and comparative phenotypic analysis of the collaborative founder strains identifies new and known phenotypes
Source: PubMed Central journal article supplement (PMC7060152; doi:10.1007/s00335-020-09827-3), 2020-02-14
Supplement: 335_2020_9827_MOESM7_ESM.pdf [file 335_2020_9827_MOESM7_ESM.pdf]

# Table S2

| measnum | projsym | varname               | descrip                                                               | units             | aspect | mean_sq     | sum_sq      | precise_pvalue_prf | adj.p.value.BH |
|---------|---------|-----------------------|-----------------------------------------------------------------------|-------------------|--------|-------------|-------------|--------------------|----------------|
| 55001   | GMC01   | bw                    | body weight                                                           | g                 | sex    | 1430,6797   | 1430,6797   | 8,54E-54           | 7,29E-53       |
| 55011   | GMC01   | distance_1            | distance traveled, successive 5 min intervals                         | cm                | sex    | 11070264,84 | 11070264,84 | 0,017268964        | 0,029733256    |
| 55012   | GMC01   | distance_2            | distance traveled, successive 5 min intervals                         | cm                | sex    | 10187682,41 | 10187682,41 | 0,018867798        | 0,03184407     |
| 55014   | GMC01   | distance_4            | distance traveled, successive 5 min intervals                         | cm                | sex    | 9302718,068 | 9302718,068 | 0,005921193        | 0,011162691    |
| 55015   | GMC01   | distance_total        | distance traveled total, 20 min test                                  | cm                | sex    | 128386088,7 | 128386088,7 | 0,010241811        | 0,018375013    |
| 55032   | GMC01   | whole_speed           | average speed in whole arena, 20 min test                             | cm/s              | sex    | 142,56      | 142,56      | 0,002527463        | 0,005043114    |
| 55041   | GMC01   | center_distance       | distance traveled in center of arena, 20 min test                     | cm                | sex    | 59353677,98 | 59353677,98 | 1,01E-06           | 2,80E-06       |
| 55043   | GMC01   | center_permanence     | permanence time in center of arena, 20 min test                       | s                 | sex    | 14736,8909  | 14736,8909  | 0,017774422        | 0,030298117    |
| 55046   | GMC01   | center_entries        | number of entries in center of arena, 20 min test                     | n                 | sex    | 60746,8225  | 60746,8225  | 0,0001043          | 0,000250204    |
| 55051   | GMC01   | center_distance_1     | center distance, successive 5 min intervals                           | %                 | sex    | 521,4614    | 521,4614    | 1,22E-05           | 3,20E-05       |
| 55052   | GMC01   | center_distance_2     | center distance, successive 5 min intervals                           | %                 | sex    | 216,1855    | 216,1855    | 0,013523007        | 0,023811645    |
| 55054   | GMC01   | center_distance_4     | center distance, successive 5 min intervals                           | %                 | sex    | 464,2466    | 464,2466    | 0,001374733        | 0,002849569    |
| 55055   | GMC01   | center_distance_total | percentage of total distance in center, 20 min test                   | %                 | sex    | 278,4916    | 278,4916    | 0,000296069        | 0,000670672    |
| 55061   | GMC01   | center_time_1         | center time, successive 5 min intervals                               | %                 | sex    | 337,8764    | 337,8764    | 2,92E-05           | 7,38E-05       |
| 55065   | GMC01   | center_time_total     | percentage of total time spent in center, 20 min test                 | %                 | sex    | 102,2582    | 102,2582    | 0,017840914        | 0,030350877    |
| 55073   | GMC01   | periphery_permanence  | permanence time in periphery, 20 min test                             | s                 | sex    | 14738,2754  | 14738,2754  | 0,01776947         | 0,030298117    |
| 55074   | GMC01   | periphery_speed       | average speed in periphery, 20 min test                               | cm/s              | sex    | 86,4927     | 86,4927     | 0,012793689        | 0,022714782    |
| 55101   | GMC02   | bw                    | body weight                                                           | g                 | sex    | 1359,0134   | 1359,0134   | 4,01E-58           | 3,80E-57       |
| 55111   | GMC02   | front_paws1           | forelimb grip strength                                                | g                 | sex    | 8606,9004   | 8606,9004   | 1,95E-08           | 6,00E-08       |
| 55112   | GMC02   | front_paws2           | forelimb grip strength                                                | g                 | sex    | 9693,9945   | 9693,9945   | 5,76E-10           | 1,98E-09       |
| 55113   | GMC02   | front_paws3           | forelimb grip strength                                                | g                 | sex    | 11139,1204  | 11139,1204  | 1,83E-10           | 6,47E-10       |
| 55114   | GMC02   | front_paws_mean       | forelimb grip strength, mean                                          | g                 | sex    | 9825,4147   | 9825,4147   | 1,47E-11           | 5,51E-11       |
| 55115   | GMC02   | front_paws_adj        | forelimb grip strength (mean) normalized to body w ratio              | g                 | sex    | 18,2353     | 18,2353     | 7,40E-08           | 2,21E-07       |
| 55121   | GMC02   | all_paws1             | forelimb and hindlimb grip strength                                   | g                 | sex    | 25603,4017  | 25603,4017  | 1,52E-10           | 5,42E-10       |
| 55122   | GMC02   | all_paws2             | forelimb and hindlimb grip strength                                   | g                 | sex    | 25707,664   | 25707,664   | 7,72E-11           | 2,77E-10       |
| 55123   | GMC02   | all_paws3             | forelimb and hindlimb grip strength                                   | g                 | sex    | 23154,732   | 23154,732   | 1,60E-09           | 5,31E-09       |
| 55124   | GMC02   | all_paws_mean         | forelimb and hindlimb grip strength, mean                             | g                 | sex    | 24815,0517  | 24815,0517  | 1,38E-11           | 5,20E-11       |
| 55125   | GMC02   | all_paws_adj          | forelimb and hindlimb grip strength (mean) normalized to body w ratio | g                 | sex    | 80,93       | 80,93       | 2,04E-11           | 7,54E-11       |
| 55201   | GMC03   | bw                    | body weight                                                           | g                 | sex    | 1359,0134   | 1359,0134   | 4,01E-58           | 3,80E-57       |
| 55211   | GMC03   | coat_app              | coat appearance (1=tidy, 2=irregular)                                 | score             | sex    | 0,743       | 0,743       | 0,000210401        | 0,000485628    |
| 55214   | GMC03   | pelvic_elev           | pelvic elevation (0=less than 5, 1=5 or more, 2=no di)                | score             | sex    | 0,3968      | 0,3968      | 0,019981305        | 0,033590618    |
| 55222   | GMC03   | urinate               | urination (0=present, 1=absent)                                       | score             | sex    | 1,1478      | 1,1478      | 0,017665989        | 0,030233978    |
| 55301   | GMC04   | bw                    | body weight                                                           | g                 | sex    | 1459,5067   | 1459,5067   | 3,50E-60           | 3,56E-59       |
| 55313   | GMC04   | LatFall_3             | latency to fall from accelerating rotarod (8rpm/min)                  | s                 | sex    | 48850,8333  | 48850,8333  | 0,006639853        | 0,012380862    |
| 55401   | GMC05   | bw                    | body weight                                                           | g                 | sex    | 1308,5151   | 1308,5151   | 2,36E-47           | 1,72E-46       |
| 55413   | GMC05   | ASR_80                | acoustic startle response (ASR)                                       | amplitude         | sex    | 167753,5938 | 167753,5938 | 0,000414945        | 0,000932534    |
| 55414   | GMC05   | ASR_85                | acoustic startle response (ASR)                                       | amplitude         | sex    | 285788,1175 | 285788,1175 | 0,000338308        | 0,000764326    |
| 55415   | GMC05   | ASR_90                | acoustic startle response (ASR)                                       | amplitude         | sex    | 681730,8564 | 681730,8564 | 3,05E-05           | 7,65E-05       |
| 55416   | GMC05   | ASR_100               | acoustic startle response (ASR)                                       | amplitude         | sex    | 2449395,913 | 2449395,913 | 7,92E-11           | 2,83E-10       |
| 55417   | GMC05   | ASR_110               | acoustic startle response (ASR)                                       | amplitude         | sex    | 2831425,016 | 2831425,016 | 6,55E-09           | 2,06E-08       |
| 55418   | GMC05   | ASR_120               | acoustic startle response (ASR)                                       | amplitude         | sex    | 2780450,346 | 2780450,346 | 4,36E-10           | 1,51E-09       |
| 55421   | GMC05   | ASR_PP_67             | acoustic startle response (ASR), 110 db sound pressure                | amplitude         | sex    | 1203366,608 | 1203366,608 | 0,000777041        | 0,001688532    |
| 55422   | GMC05   | ASR_PP_69             | acoustic startle response (ASR), 110 db sound pressure                | amplitude         | sex    | 942198,5579 | 942198,5579 | 0,002217497        | 0,004476932    |
| 55424   | GMC05   | ASR_PP_81             | acoustic startle response (ASR), 110 db sound pressure                | amplitude         | sex    | 395080,3094 | 395080,3094 | 0,011681732        | 0,020827138    |
| 55441   | GMC05   | ASR_ISI_5             | acoustic startle response (ASR)                                       | amplitude         | sex    | 780801,0222 | 780801,0222 | 0,003700114        | 0,007149088    |
| 55442   | GMC05   | ASR_ISI_25            | acoustic startle response (ASR)                                       | amplitude         | sex    | 590501,18   | 590501,18   | 0,006850738        | 0,012690955    |
| 55443   | GMC05   | ASR_ISI_100           | acoustic startle response (ASR)                                       | amplitude         | sex    | 1947555,003 | 1947555,003 | 4,51E-07           | 1,29E-06       |
| 55501   | GMC06   | bw_before_fast        | body weight                                                           | g                 | sex    | 1504,4385   | 1504,4385   | 6,64E-45           | 4,57E-44       |
| 55502   | GMC06   | bw_after_fast         | body weight                                                           | g                 | sex    | 1108,1075   | 1108,1075   | 1,64E-33           | 9,45E-33       |
| 55521   | GMC06   | CHOL                  | total cholesterol (plasma CHOL, 16h fast)                             | mmol/L            | sex    | 21,101      | 21,101      | 6,02E-20           | 2,62E-19       |
| 55522   | GMC06   | HDL                   | HDL cholesterol (plasma HDL, 16h fast)                                | mmol/L            | sex    | 7,9561      | 7,9561      | 5,94E-23           | 2,87E-22       |
| 55523   | GMC06   | nonHDL                | non-HDL cholesterol (plasma non-HDL) (CHOL minus HDL)                 | mmol/L            | sex    | 3,1421      | 3,1421      | 1,65E-08           | 5,09E-08       |
| 55525   | GMC06   | TG                    | triglyceride (plasma TG, 16h fast)                                    | mmol/L            | sex    | 15,1643     | 15,1643     | 4,38E-09           | 1,40E-08       |
| 55601   | GMC07   | bw                    | body weight                                                           | g                 | sex    | 1713,9662   | 1713,9662   | 3,68E-55           | 3,20E-54       |
| 55701   | GMC08   | TEWL_adj              | transepidermal water loss, normalized                                 | g/m<sup>2</sup>/h | sex    | 1517,132    | 1517,132    | 5,40E-09           | 1,71E-08       |
| 55702   | GMC08   | TEWL_CV               | coefficient of variation of transepidermal water loss                 | %                 | sex    | 0,2441      | 0,2441      | 0,020874489        | 0,035023209    |
| 55801   | GMC09   | bw_before             | body weight before testing                                            | g                 | sex    | 1801,8796   | 1801,8796   | 9,07E-58           | 8,33E-57       |
| 55802   | GMC09   | bw_after              | body weight after testing                                             | g                 | sex    | 1570,5699   | 1570,5699   | 1,15E-53           | 9,63E-53       |
| 55811   | GMC09   | food                  | total food intake, 21 h test                                          | g                 | sex    | 4,6511      | 4,6511      | 0,004475887        | 0,008551248    |
| 55831   | GMC09   | VO2_mean              | mean oxygen consumption, 21 h test, 15 min bins                       | mL/h              | sex    | 2176,1962   | 2176,1962   | 3,31E-09           | 1,07E-08       |
| 55832   | GMC09   | VO2_mean              | mean carbon dioxide production, 21 h test, 15 min bins                | mL/h              | sex    | 1936,0486   | 1936,0486   | 3,34E-09           | 1,07E-08       |
| 55841   | GMC09   | heat_mean             | mean heat production, 21 h test, 15 min bins                          | kJ/h              | sex    | 0,9622      | 0,9622      | 1,05E-09           | 3,54E-09       |
| 55854   | GMC09   | breaks_YA_mean        | mean ambulatory movement on Y-axis, 21 h test, 15 min bins            | n                 | sex    | 3653637,389 | 3653637,389 | 0,001210807        | 0,002528189    |
| 55855   | GMC09   | breaks_YF_mean        | mean fine movement on Y-axis, 21 h test, 15 min bins                  | n                 | sex    | 186226,535  | 186226,535  | 1,69E-05           | 4,36E-05       |
| 55856   | GMC09   | breaks_Z_mean         | mean rearing movement on Z-axis, 21 h test, 15 min bins               | n                 | sex    | 51728,9061  | 51728,9061  | 0,008198655        | 0,015025003    |
| 55857   | GMC09   | distance_mean         | mean distance traveled, 21 h test, 15 min bins                        | cm                | sex    | 63113483,86 | 63113483,86 | 0,030410652        | 0,049847787    |
| 55901   | GMC10   | bw_13wk               | body weight                                                           | g                 | sex    | 1703,4363   | 1703,4363   | 1,67E-61           | 1,76E-60       |
| 55902   | GMC10   | bw_19wk               | body weight                                                           | g                 | sex    | 1482,2183   | 1482,2183   | 1,65E-30           | 9,13E-30       |
| 55911   | GMC10   | fat_13wk              | fat tissue mass, whole body with head (NMR)                           | g                 | sex    | 7,7576      | 7,7576      | 0,004606553        | 0,008781241    |
| 55921   | GMC10   | lean_13wk             | lean tissue mass, whole body with head (NMR)                          | g                 | sex    | 530,802     | 530,802     | 8,13E-64           | 8,90E-63       |
| 55922   | GMC10   | lean_19wk             | lean tissue mass, whole body with head (NMR)                          | g                 | sex    | 580,5071    | 580,5071    | 1,25E-42           | 8,31E-42       |
| 56001   | GMC11   | bw_before_fast        | body weight                                                           | g                 | sex    | 1493,6175   | 1493,6175   | 4,48E-52           | 3,54E-51       |
| 56002   | GMC11   | bw_after_fast         | body weight                                                           | g                 | sex    | 606,4132    | 606,4132    | 5,05E-22           | 2,34E-21       |
| 56012   | GMC11   | GLU_15                | intraperitoneal glucose tolerance test (20% glucose)                  | mmol/L            | sex    | 123,8224    | 123,8224    | 0,00270503         | 0,00535297     |
| 56013   | GMC11   | GLU_30                | intraperitoneal glucose tolerance test (20% glucose)                  | mmol/L            | sex    | 244,5688    | 244,5688    | 8,15E-05           | 0,000197229    |
| 56014   | GMC11   | GLU_60                | intraperitoneal glucose tolerance test (20% glucose)                  | mmol/L            | sex    | 147,4402    | 147,4402    | 0,002003305        | 0,004063711    |
| 56015   | GMC11   | GLU_120               | intraperitoneal glucose tolerance test (20% glucose)                  | mmol/L            | sex    | 98,762      | 98,762      | 0,002612468        | 0,005200577    |
| 56101   | GMC12   | bw                    | body weight                                                           | g                 | sex    | 1361,7984   | 1361,7984   | 8,38E-45           | 5,72E-44       |
| 56121   | GMC12   | LV_mass               | left ventricular mass corrected                                       | mg                | sex    | 537,068     | 537,068     | 0,000653818        | 0,00144653     |
| 56124   | GMC12   | stroke_vol            | stroke volume, volume of blood pumped from one v                      | mL/micro;L        | sex    | 1105,6296   | 1105,6296   | 1,11E-05           | 2,91E-05       |
| 56125   | GMC12   | cardiac_output        | cardiac output, volume of blood pumped by the heart                   | mL/min            | sex    | 601,6338    | 601,6338    | 2,69E-11           | 9,83E-11       |
| 56133   | GMC12   | LVID_diastole         | left ventricular internal dimension                                   | mm                | sex    | 2,4599      | 2,4599      | 0,000128014        | 0,000306229    |
| 56301   | GMC14   | bw                    | body weight                                                           | g                 | sex    | 1829,824    | 1829,824    | 6,39E-46           | 4,58E-45       |
| 56302   | GMC14   | body_length           | body length                                                           | mm                | sex    | 985,723     | 985,723     | 2,89E-15           | 1,16E-14       |
| 56321   | GMC14   | eye_length_L          | eye axial length                                                      | mm                | sex    | 0,1682      | 0,1682      | 2,66E-08           | 8,13E-08       |
| 56322   | GMC14   | eye_length_R          | eye axial length                                                      | mm                | sex    | 0,0413      | 0,0413      | 6,66E-05           | 0,000161657    |
| 56401   | GMC15   | WBC                   | white blood cell count (WBC; per volume x 10<sup>6</sup>)             | n/micro;L         | sex    | 44,817      | 44,817      | 0,001079811        | 0,002265746    |
| 56404   | GMC15   | RBC                   | red blood cell count (RBC; per volume x 10<sup>6</sup>)               | n/micro;L         | sex    | 10,7854     | 10,7854     | 0,001441421        | 0,002980566    |
| 56408   | GMC15   | MCV                   | mean RBC corpuscular volume (MCV)                                     | fL                | sex    | 44,3169     | 44,3169     | 0,00313221         | 0,006122571    |
| 56412   | GMC15   | MCH                   | calculated mean RBC corpuscular hemoglobin content                    | pg                | sex    | 7,1457      | 7,1457      | 3,57E-05           | 8,91E-05       |
| 56431   | GMC15   | PLT                   | platelet count (PLT; units per volume x 10<sup>3</sup>)               | n/micro;L         | sex    | 913472,7423 | 913472,7423 | 0,000246321        | 0,000563963    |
| 56441   | GMC15   | PCT                   | plateletcrit (PCT)                                                    | %                 | sex    | 0,3509      | 0,3509      | 0,000253973        | 0,000579928    |

|       |       |                     |                                                   |                 |     |             |             |             |             |
|-------|-------|---------------------|---------------------------------------------------|-----------------|-----|-------------|-------------|-------------|-------------|
| 56501 | GMC16 | bw_17               | body weight                                       | g               | sex | 248,004     | 248,004     | 1,57E-07    | 4,65E-07    |
| 56502 | GMC16 | bw_21               | body weight                                       | g               | sex | 874,9392    | 874,9392    | 5,92E-13    | 2,27E-12    |
| 56513 | GMC16 | chloride_21         | chloride (plasma Cl)                              | mmol/L          | sex | 71,5161     | 71,5161     | 0,002414171 | 0,004839676 |
| 56515 | GMC16 | iron_21             | iron (plasma Fe)                                  | &micro;mol/L    | sex | 178,0431    | 178,0431    | 0,002809961 | 0,005529278 |
| 56519 | GMC16 | lactate_21          | lactate (plasma)                                  | mmol/L          | sex | 61,5057     | 61,5057     | 0,000802448 | 0,001726174 |
| 56522 | GMC16 | potassium_17        | potassium (plasma K)                              | mmol/L          | sex | 1,1463      | 1,1463      | 0,0179027   | 0,030395439 |
| 56523 | GMC16 | potassium_21        | potassium (plasma K)                              | mmol/L          | sex | 1,6669      | 1,6669      | 0,001868814 | 0,00380891  |
| 56524 | GMC16 | sodium_17           | sodium (plasma Na)                                | mmol/L          | sex | 125,2895    | 125,2895    | 9,79E-05    | 0,0002362   |
| 56525 | GMC16 | sodium_21           | sodium (plasma Na)                                | mmol/L          | sex | 177,4938    | 177,4938    | 5,36E-05    | 0,000131422 |
| 56526 | GMC16 | ALP_17              | alkaline phosphatase (plasma ALP)                 | IU/L            | sex | 29484,9     | 29484,9     | 1,29E-09    | 4,32E-09    |
| 56527 | GMC16 | ALP_21              | alkaline phosphatase (plasma ALP)                 | IU/L            | sex | 19323,9573  | 19323,9573  | 0,000798805 | 0,001722675 |
| 56531 | GMC16 | AST_21              | aspartate transaminase (plasma AST)               | IU/L            | sex | 49809,7037  | 49809,7037  | 0,000147037 | 0,000346877 |
| 56534 | GMC16 | amylase_17          | alpha-amylase (plasma)                            | IU/L            | sex | 44822,3555  | 44822,3555  | 0,015739867 | 0,027488439 |
| 56535 | GMC16 | amylase_21          | alpha-amylase (plasma)                            | IU/L            | sex | 284131,3036 | 284131,3036 | 7,20E-08    | 2,16E-07    |
| 56542 | GMC16 | total_protein_17    | total protein (plasma TP)                         | g/L             | sex | 44,8855     | 44,8855     | 0,003981705 | 0,007641294 |
| 56543 | GMC16 | total_protein_21    | total protein (plasma TP)                         | g/L             | sex | 52,9002     | 52,9002     | 0,008278988 | 0,015107384 |
| 56545 | GMC16 | urea_21             | blood urea nitrogen (plasma BUN)                  | mmol/L          | sex | 31,7373     | 31,7373     | 0,000877812 | 0,001869454 |
| 56547 | GMC16 | CHOL_21             | total cholesterol (plasma CHOL)                   | mmol/L          | sex | 10,7866     | 10,7866     | 5,35E-11    | 1,93E-10    |
| 56548 | GMC16 | TG_17               | triglyceride (plasma TG)                          | mmol/L          | sex | 5,1429      | 5,1429      | 0,011674451 | 0,020827138 |
| 56549 | GMC16 | TG_21               | triglyceride (plasma TG)                          | mmol/L          | sex | 23,5633     | 23,5633     | 3,12E-09    | 1,01E-08    |
| 56601 | GMC17 | bw                  | body weight                                       | g               | sex | 1232,1548   | 1232,1548   | 1,35E-23    | 6,65E-23    |
| 56701 | GMC18 | bw                  | body weight                                       | g               | sex | 1389,5884   | 1389,5884   | 1,25E-25    | 6,34E-25    |
| 56702 | GMC18 | body_length         | body length                                       | cm              | sex | 3,1327      | 3,1327      | 4,09E-13    | 1,57E-12    |
| 56711 | GMC18 | body_size           | body size (1=small, 2=normal, 3=big)              | designation     | sex | 3,7048      | 3,7048      | 7,85E-09    | 2,45E-08    |
| 56722 | GMC18 | LEANmass_Xhead      | lean tissue mass, without head                    | g               | sex | 650,5533    | 650,5533    | 7,46E-23    | 3,58E-22    |
| 56723 | GMC18 | SOFTmass_Xhead      | total soft tissue mass, without head              | g               | sex | 1018,1182   | 1018,1182   | 9,96E-21    | 4,43E-20    |
| 56725 | GMC18 | bone_area_Xhead     | bone area, without head                           | cm <sup>2</sup> | sex | 84,3412     | 84,3412     | 5,27E-05    | 0,000129598 |
| 56726 | GMC18 | bone_mass_Xhead     | bone mass, without head                           | g               | sex | 0,3556      | 0,3556      | 2,20E-05    | 5,63E-05    |
| 56733 | GMC18 | LEANmass_wholebody  | lean tissue mass, whole body including head       | g               | sex | 761,739     | 761,739     | 3,18E-22    | 1,48E-21    |
| 56734 | GMC18 | SOFTmass_wholebody  | total soft tissue mass, whole body including head | g               | sex | 1225,5008   | 1225,5008   | 6,85E-22    | 3,16E-21    |
| 56735 | GMC18 | bone_area_wholebody | bone area, whole body including head              | cm <sup>2</sup> | sex | 94,5675     | 94,5675     | 6,09E-05    | 0,000148543 |
| 56736 | GMC18 | bone_mass_wholebody | bone mass, whole body including head              | g               | sex | 0,442       | 0,442       | 4,31E-05    | 0,000106774 |
| 56912 | GMC20 | IgG3_17             | immunoglobulin G3 (plasma IgG3)                   | &micro;g/mL     | sex | 76063,6506  | 76063,6506  | 0,010219138 | 0,018372934 |
| 56914 | GMC20 | IgE_17              | immunoglobulin E (plasma IgE)                     | ng/mL           | sex | 3582142,201 | 3582142,201 | 0,008601515 | 0,015629136 |
| 56915 | GMC20 | IgE_21              | immunoglobulin E (plasma IgE)                     | ng/mL           | sex | 4648481,62  | 4648481,62  | 0,001944739 | 0,003954304 |
| 56916 | GMC20 | aDNA_17             | anti-DNA autoantibodies (plasma)                  | sex             | sex | 0,0099      | 0,0099      | 0,000149156 | 0,000350908 |
| 56918 | GMC20 | RF_17               | rheumatoid factor (plasma RF)                     | sex             | sex | 0,0065      | 0,0065      | 0,006144586 | 0,011532916 |
| 57001 | GMC21 | bw                  | body weight                                       | g               | sex | 980,8556    | 980,8556    | 9,93E-16    | 4,02E-15    |
| 57021 | GMC21 | heart_wt            | heart weight                                      | mg              | sex | 37727,1327  | 37727,1327  | 1,10E-17    | 4,61E-17    |
| 57022 | GMC21 | liver_wt            | liver weight                                      | g               | sex | 4,5752      | 4,5752      | 2,22E-22    | 1,04E-21    |
