# Supplementary material for: A comprehensive and comparative phenotypic analysis of the collaborative founder strains identifies new and known phenotypes
Source: PubMed Central journal article supplement (PMC7060152; doi:10.1007/s00335-020-09827-3), 2020-02-14
Supplement: 335_2020_9827_MOESM8_ESM.pdf [file 335_2020_9827_MOESM8_ESM.pdf]

# Table S3

| measnum | projsym | varname               | descrip                                                                   | units                           | aspect     | mean_sq     | sum_sq      | precise_pvalue_prf | adj.p.value.BH |
|---------|---------|-----------------------|---------------------------------------------------------------------------|---------------------------------|------------|-------------|-------------|--------------------|----------------|
| 55001   | GMC01   | bw                    | body weight                                                               | g                               | sex:strain | 25,2635     | 176,8444    | 1,44E-07           | 4,27E-07       |
| 55014   | GMC01   | distance_4            | distance traveled, successive 5 min intervals                             | cm                              | sex:strain | 3002539,351 | 21017775,45 | 0,017390408        | 0,02988211     |
| 55023   | GMC01   | rears_3               | number of rears, successive 5 min intervals                               | n                               | sex:strain | 282,9085    | 1980,3596   | 0,002337388        | 0,004070852    |
| 55031   | GMC01   | whole_rest            | resting time in whole arena, 20 min test                                  | s                               | sex:strain | 3395,7297   | 23770,1077  | 0,016406599        | 0,028420357    |
| 55041   | GMC01   | center_distance       | distance traveled in center of arena, 20 min test                         | cm                              | sex:strain | 14779705,03 | 103457935,2 | 8,78E-07           | 2,46E-06       |
| 55043   | GMC01   | center_permanence     | permanence time in center of arena, 20 min test                           | s                               | sex:strain | 9684,0471   | 67788,3298  | 0,000706551        | 0,001539271    |
| 55046   | GMC01   | center_entries        | number of entries in center of arena, 20 min test                         | n                               | sex:strain | 16412,1591  | 114885,1137 | 0,000211458        | 0,000486751    |
| 55051   | GMC01   | center_distance_1     | center distance, successive 5 min intervals                               | %                               | sex:strain | 110,8612    | 776,0284    | 0,000194447        | 0,000450074    |
| 55055   | GMC01   | center_distance_total | percentage of total distance in center, 20 min test                       | %                               | sex:strain | 72,4681     | 507,2764    | 0,001314222        | 0,002730768    |
| 55061   | GMC01   | center_time_1         | center time, successive 5 min intervals                                   | %                               | sex:strain | 93,8369     | 656,8586    | 2,31E-05           | 5,89E-05       |
| 55063   | GMC01   | center_time_3         | center time, successive 5 min intervals                                   | %                               | sex:strain | 126,2559    | 883,7913    | 0,025764172        | 0,042558226    |
| 55065   | GMC01   | center_time_total     | percentage of total time spent in center, 20 min test                     | %                               | sex:strain | 67,2999     | 471,0995    | 0,000703996        | 0,001539164    |
| 55072   | GMC01   | periphery_rest        | resting time in periphery, 20 min test                                    | s                               | sex:strain | 3308,6603   | 23160,6219  | 0,004955355        | 0,009425107    |
| 55073   | GMC01   | periphery_permanence  | permanence time in periphery, 20 min test                                 | s                               | sex:strain | 9686,6774   | 67806,7419  | 0,000704699        | 0,001539164    |
| 55101   | GMC02   | bw                    | body weight                                                               | g                               | sex:strain | 26,0461     | 182,3226    | 2,27E-09           | 7,39E-09       |
| 55122   | GMC02   | all_paws2             | forelimb and hindlimb grip strength                                       | g                               | sex:strain | 1582,0717   | 11074,5021  | 0,007261731        | 0,013365342    |
| 55123   | GMC02   | all_paws3             | forelimb and hindlimb grip strength                                       | g                               | sex:strain | 2121,8453   | 14852,9173  | 0,001044476        | 0,002202425    |
| 55124   | GMC02   | all_paws_mean         | forelimb and hindlimb grip strength, mean                                 | g                               | sex:strain | 1558,5107   | 10909,5748  | 0,003303608        | 0,006412003    |
| 55125   | GMC02   | all_paws_adj          | forelimb and hindlimb grip strength (mean) normalized to body weight      | g                               | sex:strain | 5,3789      | 37,652      | 0,002408567        | 0,004839676    |
| 55201   | GMC03   | bw                    | body weight                                                               | g                               | sex:strain | 26,0461     | 182,3226    | 2,27E-09           | 7,39E-09       |
| 55211   | GMC03   | coat_app              | coat appearance (1=tidy, 2=irregular)                                     | score                           | sex:strain | 0,2243      | 1,5703      | 0,000175247        | 0,000407795    |
| 55212   | GMC03   | whiskers              | whiskers (0=present, 1=absent)                                            | score                           | sex:strain | 0,0158      | 0,1105      | 0,024489057        | 0,040530338    |
| 55216   | GMC03   | transfer_arousal      | transfer arousal (0=prolonged freeze, 1=brief freeze, 2=immediate)        | score                           | sex:strain | 0,4605      | 3,2238      | 0,015986954        | 0,027749713    |
| 55301   | GMC04   | bw                    | body weight                                                               | g                               | sex:strain | 28,9159     | 202,4113    | 2,81E-10           | 9,78E-10       |
| 55401   | GMC05   | bw                    | body weight                                                               | g                               | sex:strain | 33,5073     | 234,5511    | 4,69E-09           | 1,49E-08       |
| 55413   | GMC05   | ASR_80                | acoustic startle response (ASR)                                           | amplitude                       | sex:strain | 30365,7064  | 212559,9449 | 0,026263368        | 0,043299067    |
| 55414   | GMC05   | ASR_85                | acoustic startle response (ASR)                                           | amplitude                       | sex:strain | 74759,4482  | 523316,1374 | 0,001502313        | 0,003091506    |
| 55415   | GMC05   | ASR_90                | acoustic startle response (ASR)                                           | amplitude                       | sex:strain | 188706,8585 | 1320948,009 | 2,60E-05           | 6,60E-05       |
| 55416   | GMC05   | ASR_100               | acoustic startle response (ASR)                                           | amplitude                       | sex:strain | 414162,4252 | 2899136,976 | 1,51E-08           | 4,68E-08       |
| 55417   | GMC05   | ASR_110               | acoustic startle response (ASR)                                           | amplitude                       | sex:strain | 472671,7829 | 3308702,48  | 1,66E-06           | 4,55E-06       |
| 55418   | GMC05   | ASR_120               | acoustic startle response (ASR)                                           | amplitude                       | sex:strain | 392071,3254 | 2744499,278 | 2,01E-06           | 5,49E-06       |
| 55421   | GMC05   | ASR_PP_67             | acoustic startle response (ASR), 110 db sound pressure level              | amplitude                       | sex:strain | 321518,297  | 2250628,079 | 0,003801628        | 0,007328646    |
| 55431   | GMC05   | PPI_67                | percent prepulse inhibition (PPI), 110 db sound pressure level            | %                               | sex:strain | 2732,7878   | 19129,5145  | 4,13E-05           | 0,000102463    |
| 55433   | GMC05   | PPI_73                | percent prepulse inhibition (PPI), 110 db sound pressure level            | %                               | sex:strain | 1694,9496   | 11864,6475  | 0,015797964        | 0,02750721     |
| 55435   | GMC05   | PPI_global            | percentage prepulse inhibition (PPI) evoked by 110 dB sound press         | %                               | sex:strain | 1154,8712   | 8084,0982   | 0,005747424        | 0,010883149    |
| 55443   | GMC05   | ASR_ISI_100           | acoustic startle response (ASR)                                           | amplitude                       | sex:strain | 200063,1353 | 1400441,947 | 0,008872507        | 0,016019282    |
| 55451   | GMC05   | PPI_ISI_5             | prepulse inhibition (PPI)                                                 | %                               | sex:strain | 2387,9283   | 16715,4984  | 1,80E-06           | 4,93E-06       |
| 55452   | GMC05   | PPI_ISI_25            | prepulse inhibition (PPI)                                                 | %                               | sex:strain | 1814,0029   | 12698,0205  | 0,003132978        | 0,006122571    |
| 55453   | GMC05   | PPI_ISI_100           | prepulse inhibition (PPI)                                                 | %                               | sex:strain | 1144,2038   | 8009,4265   | 0,016728577        | 0,028861019    |
| 55501   | GMC06   | bw_before_fast        | body weight                                                               | g                               | sex:strain | 21,0586     | 147,4099    | 3,05E-05           | 7,65E-05       |
| 55502   | GMC06   | bw_after_fast         | body weight                                                               | g                               | sex:strain | 14,9199     | 59,6797     | 0,012835008        | 0,022740866    |
| 55521   | GMC06   | CHOL                  | total cholesterol (plasma CHOL, 16h fast)                                 | mmol/L                          | sex:strain | 1,7679      | 7,0716      | 8,57E-07           | 2,41E-06       |
| 55522   | GMC06   | HDL                   | HDL cholesterol (plasma HDL, 16h fast)                                    | mmol/L                          | sex:strain | 0,2858      | 1,1434      | 0,00094825         | 0,002009442    |
| 55523   | GMC06   | nonHDL                | non-HDL cholesterol (plasma non-HDL) (CHOL minus HDL, 16h fast)           | mmol/L                          | sex:strain | 1,0706      | 4,2825      | 1,40E-08           | 4,35E-08       |
| 55601   | GMC07   | bw                    | body weight                                                               | g                               | sex:strain | 36,3133     | 254,1931    | 1,53E-09           | 5,11E-09       |
| 55701   | GMC08   | TEWL_adj              | transepidermal water loss, normalized                                     | g/m <sup>2</sup> <sup>2</sup>/h | sex:strain | 131,1445    | 918,0114    | 0,00323634         | 0,00629575     |
| 55801   | GMC09   | bw_before             | body weight before testing                                                | g                               | sex:strain | 34,613      | 242,2913    | 7,19E-09           | 7,15E-09       |
| 55802   | GMC09   | bw_after              | body weight after testing                                                 | g                               | sex:strain | 29,9361     | 209,553     | 3,14E-08           | 9,54E-08       |
| 55831   | GMC09   | VO2_mean              | mean oxygen consumption, 21 h test, 15 min bins                           | ml/h                            | sex:strain | 220,2746    | 1541,9221   | 0,00059959         | 0,001333463    |
| 55832   | GMC09   | VCO2_mean             | mean carbon dioxide production, 21 h test, 15 min bins                    | ml/h                            | sex:strain | 152,4535    | 1067,1748   | 0,005357116        | 0,010166615    |
| 55841   | GMC09   | heat_mean             | mean heat production, 21 h test, 15 min bins                              | kJ/h                            | sex:strain | 0,0898      | 0,6284      | 0,000695885        | 0,001527726    |
| 55851   | GMC09   | breaks_X_mean         | mean total beam breaks on X-axis, 21 h test, 15 min bins                  | n                               | sex:strain | 2628109,383 | 18396765,68 | 0,021392928        | 0,035682736    |
| 55852   | GMC09   | breaks_XA_mean        | mean ambulatory movement on X-axis, 21 h test, 15 min bins                | n                               | sex:strain | 2231646,865 | 15621528,05 | 0,013519783        | 0,023811645    |
| 55854   | GMC09   | breaks_YA_mean        | mean ambulatory movement on Y-axis, 21 h test, 15 min bins                | n                               | sex:strain | 1101131,32  | 7707919,242 | 0,002680141        | 0,005322884    |
| 55901   | GMC10   | bw_13wk               | body weight                                                               | g                               | sex:strain | 33,1256     | 231,8794    | 1,58E-10           | 5,61E-10       |
| 55902   | GMC10   | bw_19wk               | body weight                                                               | g                               | sex:strain | 29,6232     | 207,3621    | 0,001301889        | 0,00271174     |
| 55912   | GMC10   | fat_19wk              | fat tissue mass, whole body with head (NMR)                               | g                               | sex:strain | 31,5024     | 220,5171    | 5,62E-20           | 2,46E-19       |
| 55921   | GMC10   | lean_13wk             | lean tissue mass, whole body with head (NMR)                              | g                               | sex:strain | 14,9948     | 104,9634    | 2,24E-16           | 9,26E-16       |
| 55922   | GMC10   | lean_19wk             | lean tissue mass, whole body with head (NMR)                              | g                               | sex:strain | 17,9821     | 125,875     | 9,93E-10           | 3,36E-09       |
| 56001   | GMC11   | bw_before_fast        | body weight                                                               | g                               | sex:strain | 30,8355     | 215,8485    | 5,89E-09           | 1,86E-08       |
| 56011   | GMC11   | GLU_0                 | intraperitoneal glucose tolerance test (20% glucose i.p., 16h fast)       | mmol/L                          | sex:strain | 14,0567     | 56,2269     | 0,000372805        | 0,00084004     |
| 56014   | GMC11   | GLU_60                | intraperitoneal glucose tolerance test (20% glucose i.p., 16h fast)       | mmol/L                          | sex:strain | 54,9702     | 219,8809    | 0,006798643        | 0,012621829    |
| 56015   | GMC11   | GLU_120               | intraperitoneal glucose tolerance test (20% glucose i.p., 16h fast)       | mmol/L                          | sex:strain | 66,3653     | 265,4612    | 0,00010302         | 0,000247828    |
| 56101   | GMC12   | bw                    | body weight                                                               | g                               | sex:strain | 22,1666     | 155,1665    | 5,46E-06           | 1,46E-05       |
| 56112   | GMC12   | heart_rate            | heart rate, beats per min                                                 | n/min                           | sex:strain | 86871,1526  | 608098,068  | 8,76E-08           | 2,61E-07       |
| 56125   | GMC12   | cardiac_output        | cardiac output, volume of blood pumped by the heart per min               | ml/min                          | sex:strain | 41,0063     | 287,0443    | 0,001814657        | 0,003707457    |
| 56132   | GMC12   | IVS_systole           | interventricular septum                                                   | mm                              | sex:strain | 0,0061      | 0,0429      | 0,03013881         | 0,049497199    |
| 56202   | GMC13   | HR_V                  | heart rate variability, mean of differences between sequential beat n/min | n/min                           | sex:strain | 8316,4281   | 41582,1403  | 0,014158338        | 0,024827969    |
| 56203   | GMC13   | HR_CV                 | heart rate coefficient of variation (signal intensity)                    | %                               | sex:strain | 121,6241    | 608,1204    | 0,016627183        | 0,028744159    |
| 56242   | GMC13   | pN50                  | proportion of number of pairs of successive beat-to-beat intervals 1%     | %                               | sex:strain | 764,9726    | 3824,8632   | 0,006768972        | 0,012594122    |
| 56301   | GMC14   | bw                    | body weight                                                               | g                               | sex:strain | 22,8029     | 159,62      | 0,000135034        | 0,00032033     |
| 56401   | GMC15   | WBC                   | white blood cell count (WBC; per volume x 10<sup>3</sup>)                 | n/&micro;L                      | sex:strain | 10,042      | 70,294      | 0,019040003        | 0,032010687    |
| 56404   | GMC15   | RBC                   | red blood cell count (RBC; per volume x 10<sup>6</sup>)                   | n/&micro;L                      | sex:strain | 3,8876      | 27,2135     | 0,000781454        | 0,001693811    |
| 56408   | GMC15   | MCV                   | mean RBC corpuscular volume (MCV)                                         | fl                              | sex:strain | 13,9062     | 97,3436     | 0,008414959        | 0,015322762    |
| 56412   | GMC15   | MCH                   | calculated mean RBC corpuscular hemoglobin content (MCH)                  | pg                              | sex:strain | 0,9863      | 6,9042      | 0,018420551        | 0,031150793    |
| 56414   | GMC15   | MCHC                  | calculated mean RBC corpuscular hemoglobin concentration (MCHC)/g/dL      | g/dL                            | sex:strain | 3,0437      | 21,3057     | 0,003819661        | 0,007346825    |
| 56416   | GMC15   | HGB                   | hemoglobin (HGB)                                                          | g/dL                            | sex:strain | 8,1712      | 57,1983     | 0,002114451        | 0,004279007    |
| 56421   | GMC15   | HCT                   | hematocrit (HCT)                                                          | %                               | sex:strain | 57,9368     | 405,5573    | 0,009411014        | 0,016955709    |
| 56431   | GMC15   | PLT                   | platelet count (PLT; units per volume x 10<sup>3</sup>)                   | n/&micro;L                      | sex:strain | 201745,3754 | 1412217,628 | 0,004233812        | 0,008106895    |
| 56434   | GMC15   | MPV                   | mean platelet volume (MPV)                                                | fl                              | sex:strain | 0,2556      | 1,789       | 0,008724839        | 0,015786044    |
| 56436   | GMC15   | PDW                   | platelet corpuscular distribution width (PDW)                             | %                               | sex:strain | 0,8426      | 5,8982      | 0,00670895         | 0,001476661    |
| 56441   | GMC15   | PCT                   | plateletcrit (PCT)                                                        | %                               | sex:strain | 0,0943      | 0,6603      | 0,000834204        | 0,001789976    |
| 56501   | GMC16   | bw_17                 | body weight                                                               | g                               | sex:strain | 42,8709     | 171,4835    | 0,000168015        | 0,000392903    |
| 56512   | GMC16   | chloride_17           | chloride (plasma Cl)                                                      | mmol/L                          | sex:strain | 14,3746     | 57,4984     | 0,005989822        | 0,011267197    |
| 56514   | GMC16   | iron_17               | iron (plasma Fe)                                                          | &micro;mol/L                    | sex:strain | 79,7067     | 318,8267    | 0,000168387        | 0,000392903    |
| 56515   | GMC16   | iron_21               | iron (plasma Fe)                                                          | &micro;mol/L                    | sex:strain | 77,9735     | 545,8142    | 0,000429893        | 0,00096107     |
| 56524   | GMC16   | sodium_17             | sodium (plasma Na)                                                        | mmol/L                          | sex:strain | 22,3566     | 89,4264     | 0,015815035        | 0,02750721     |
| 56526   | GMC16   | ALP_17                | alkaline phosphatase (plasma ALP)                                         | IU/L                            | sex:strain | 3139,775    | 12559,1     | 0,000176936        | 0,000410608    |
| 56527   | GMC16   | ALP_21                | alkaline phosphatase (plasma ALP)                                         | IU/L                            | sex:strain | 4915,5568   | 34408,8973  | 0,005876427        | 0,011102806    |
| 56529   | GMC16   | ALT_21                | alanine transaminase (plasma ALT)                                         | IU/L                            | sex:strain | 2681,4693   | 18770,2849  | 0,002490081        | 0,004980163    |
| 56531   | GMC16   | AST_21                | aspartate transaminase (plasma AST)                                       | IU/L                            | sex:strain | 12114,3606  | 84800,5243  | 0,001052426        | 0,002213725    |
| 56532   | GMC16   | LDH_17                | lactic acid dehydrogenase (plasma LDH)                                    | IU/L                            | sex:strain | 35170,7459  | 140682,9835 | 0,018264428        | 0,030948058    |
| 56535   | GMC16   | amylase_21            | alpha-amylase (plasma)                                                    | IU/L                            | sex:strain | 47270,5056  | 330893,5393 | 1,77E-05           | 4,6E-05        |
| 56536   | GMC16   | GLU_17                | glucose (plasma GLU)                                                      | mmol/L                          | sex:strain | 307,3325    | 1229,3301   | 0,000662431        | 0,00146179     |

|       |       |                    |                                                   |             |            |             |             |             |             |
|-------|-------|--------------------|---------------------------------------------------|-------------|------------|-------------|-------------|-------------|-------------|
| 56548 | GMC16 | TG_17              | triglyceride (plasma TG)                          | mmol/L      | sex:strain | 4,1278      | 16,5113     | 0,001456264 | 0,003003983 |
| 56549 | GMC16 | TG_21              | triglyceride (plasma TG)                          | mmol/L      | sex:strain | 2,5035      | 17,5244     | 0,000290372 | 0,000661273 |
| 56601 | GMC17 | bw                 | body weight                                       | g           | sex:strain | 27,9741     | 167,8444    | 0,00635308  | 0,011898092 |
| 56701 | GMC18 | bw                 | body weight                                       | g           | sex:strain | 27,3804     | 164,2824    | 0,007605415 | 0,013967794 |
| 56711 | GMC18 | body_size          | body size (1=small, 2=normal, 3=big)              | designation | sex:strain | 0,531       | 3,1861      | 4,97E-05    | 0,000122693 |
| 56722 | GMC18 | LEANmass_Xhead     | lean tissue mass, without head                    | g           | sex:strain | 15,5338     | 62,1351     | 0,013708759 | 0,024089054 |
| 56723 | GMC18 | SOFTmass_Xhead     | total soft tissue mass, without head              | g           | sex:strain | 31,9125     | 127,65      | 0,006587537 | 0,01231019  |
| 56733 | GMC18 | LEANmass_wholebody | lean tissue mass, whole body including head       | g           | sex:strain | 21,3057     | 85,223      | 0,007152761 | 0,013193213 |
| 56734 | GMC18 | SOFTmass_wholebody | total soft tissue mass, whole body including head | g           | sex:strain | 33,9067     | 135,627     | 0,008638868 | 0,015663679 |
| 56908 | GMC20 | IgG2a_17           | immunoglobulin G2a (plasma IgG2a)                 | &micro;g/mL | sex:strain | 119662,9456 | 478651,7823 | 0,021354403 | 0,035682736 |
| 56915 | GMC20 | IgE_21             | immunoglobulin E (plasma IgE)                     | ng/mL       | sex:strain | 3434624,504 | 24042371,53 | 2,65E-07    | 7,64E-07    |
| 56916 | GMC20 | aDNA_17            | anti-DNA autoantibodies (plasma)                  |             | sex:strain | 0,002       | 0,008       | 0,013172225 | 0,023290021 |
| 56917 | GMC20 | aDNA_21            | anti-DNA autoantibodies (plasma)                  |             | sex:strain | 0,1206      | 0,8442      | 0,003169326 | 0,006179461 |
| 56919 | GMC20 | RF_21              | rheumatoid factor (plasma RF)                     |             | sex:strain | 0,072       | 0,5038      | 0,000130262 | 0,000310737 |
| 57001 | GMC21 | bw                 | body weight                                       | g           | sex:strain | 33,5388     | 234,7718    | 0,01096472  | 0,019630756 |
| 57022 | GMC21 | liver_wt           | liver weight                                      | g           | sex:strain | 0,1975      | 1,3823      | 9,21E-06    | 2,43E-05    |
