# Supplementary material for: A comprehensive and comparative phenotypic analysis of the collaborative founder strains identifies new and known phenotypes
Source: PubMed Central journal article supplement (PMC7060152; doi:10.1007/s00335-020-09827-3), 2020-02-14
Supplement: 335_2020_9827_MOESM9_ESM.pdf [file 335_2020_9827_MOESM9_ESM.pdf]

# Table S4

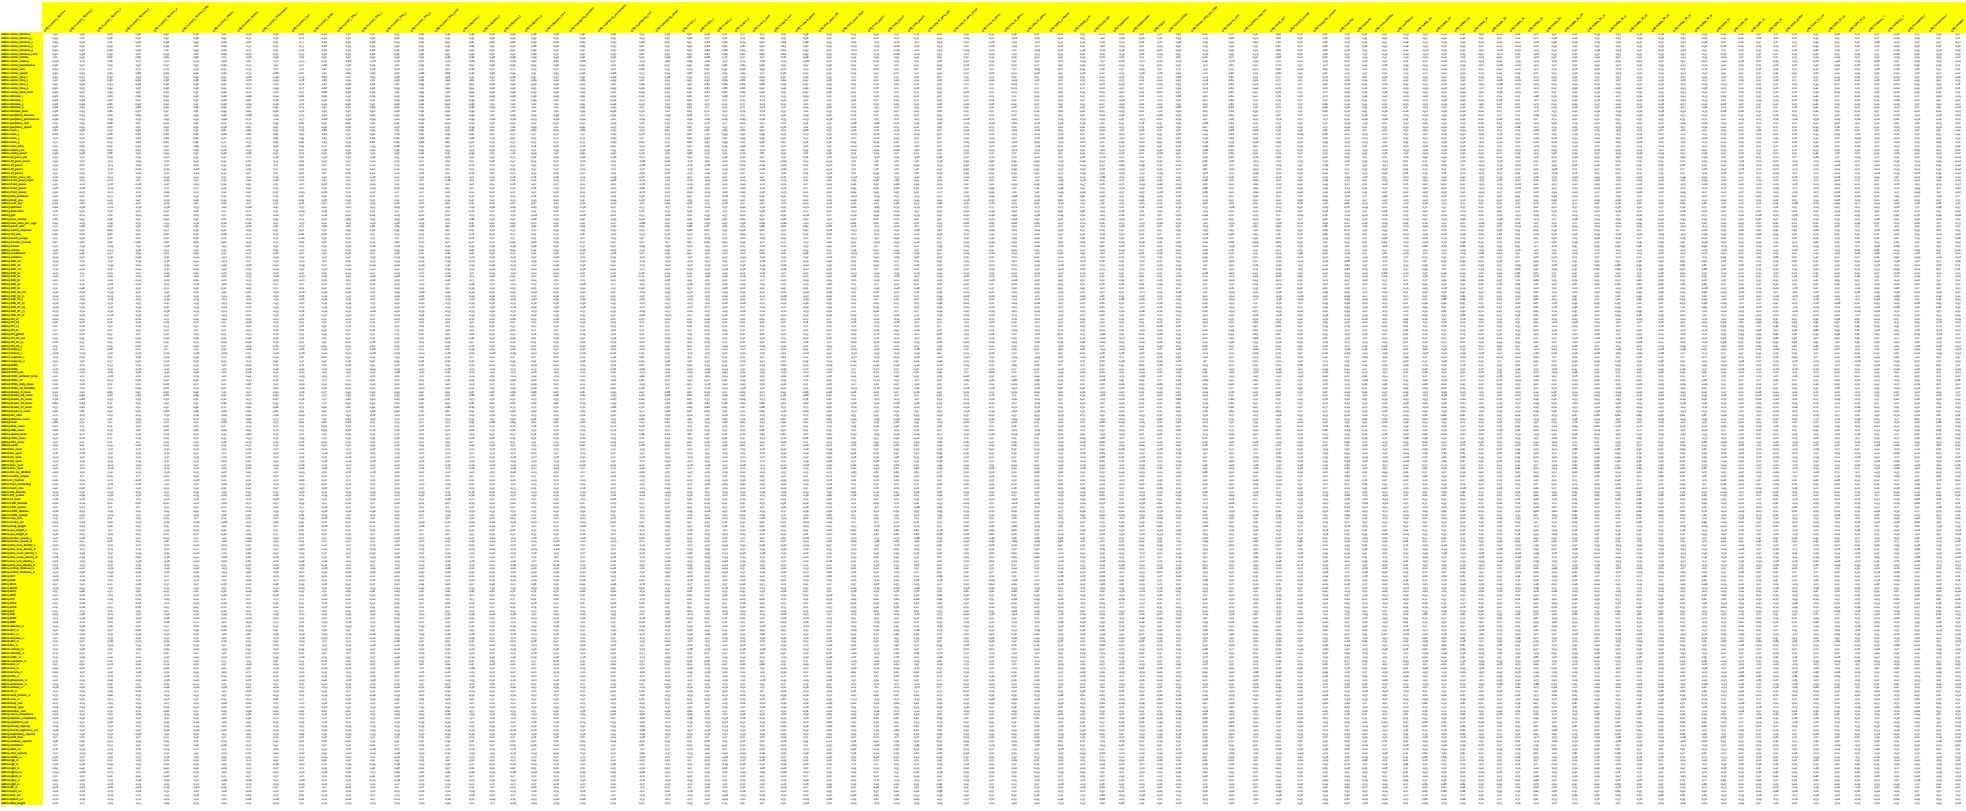

The image shows a page with a large yellow rectangular area at the top, which appears to be redacted content. Below this area, the page is mostly blank, with some faint, illegible text visible in the lower portion. The title 'Table S4' is centered at the top of the page.

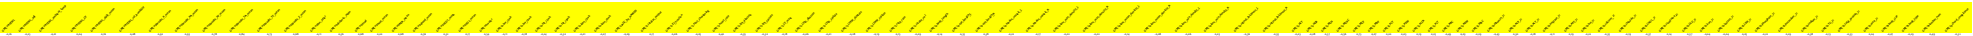

[The page contains a large area of extremely faint, illegible text, likely bleed-through from the reverse side of the paper. The text is too light to be transcribed accurately.]

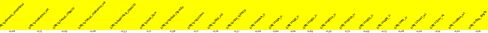

[The following text is extremely faint and illegible, appearing as a series of vertical lines of noise.]
