# Supplementary material for: A comprehensive and comparative phenotypic analysis of the collaborative founder strains identifies new and known phenotypes
Source: PubMed Central journal article supplement (PMC7060152; doi:10.1007/s00335-020-09827-3), 2020-02-14
Supplement: 335_2020_9827_MOESM10_ESM.pdf [file 335_2020_9827_MOESM10_ESM.pdf]

**Table S5**

**List of strains in each group**

LabDerived: A/J, C57BL/6J, 129S1/SvImJ  
 WTDerived: PWK/PhJ, CAST/EiJ, WSB/EiJ  
 DiseaseDerived: NZO/HILtJ, NOD/ShiLtJ

| protocol | procedure            | parameter             |
|----------|----------------------|-----------------------|
| GMC01    | Open_field_Parameter | distance_1            |
| GMC01    | Open_field_Parameter | distance_2            |
| GMC01    | Open_field_Parameter | distance_3            |
| GMC01    | Open_field_Parameter | distance_4            |
| GMC01    | Open_field_Parameter | distance_total        |
| GMC01    | Open_field_Parameter | rears_1               |
| GMC01    | Open_field_Parameter | rears_2               |
| GMC01    | Open_field_Parameter | rears_3               |
| GMC01    | Open_field_Parameter | rears_4               |
| GMC01    | Open_field_Parameter | rears_total           |
| GMC01    | Open_field_Parameter | whole_rest            |
| GMC01    | Open_field_Parameter | whole_speed           |
| GMC01    | Open_field_Parameter | center_distance       |
| GMC01    | Open_field_Parameter | center_rest           |
| GMC01    | Open_field_Parameter | center_permanence     |
| GMC01    | Open_field_Parameter | center_speed          |
| GMC01    | Open_field_Parameter | center_latency        |
| GMC01    | Open_field_Parameter | center_entries        |
| GMC01    | Open_field_Parameter | center_distance_1     |
| GMC01    | Open_field_Parameter | center_distance_2     |
| GMC01    | Open_field_Parameter | center_distance_3     |
| GMC01    | Open_field_Parameter | center_distance_4     |
| GMC01    | Open_field_Parameter | center_distance_total |

**Group comparison**

| LabDerived Vs DiseaseDerived | WTDerived Vs DiseaseDerived | WTDerived Vs LabDerived |
|------------------------------|-----------------------------|-------------------------|
| 2,46E-07                     | 3,21E-03                    | 2,32E-02                |
| 2,52E-05                     | 2,72E-02                    | 5,56E-02                |
| 4,02E-05                     | 8,36E-03                    | 1,91E-01                |
| 9,97E-06                     | 1,54E-03                    | 2,73E-01                |
| 3,62E-06                     | 4,77E-03                    | 8,06E-02                |
| 8,30E-10                     | 3,36E-01                    | 4,19E-13                |
| 2,08E-10                     | 5,39E-01                    | 4,21E-13                |
| 2,37E-07                     | 5,44E-01                    | 4,23E-12                |
| 2,66E-06                     | 9,93E-01                    | 4,16E-08                |
| 7,02E-10                     | 5,75E-01                    | 4,22E-13                |
| 6,09E-10                     | 3,99E-13                    | 3,92E-13                |
| 2,45E-06                     | 4,24E-02                    | 6,46E-03                |
| 1,13E-09                     | 1,90E-05                    | 5,32E-02                |
| 2,06E-02                     | 8,21E-01                    | 6,92E-04                |
| 3,44E-11                     | 9,72E-02                    | 5,74E-08                |
| 2,00E-02                     | 8,60E-01                    | 3,47E-02                |
| 2,24E-08                     | 2,68E-01                    | 4,26E-13                |
| 1,31E-09                     | 7,03E-06                    | 1,00E-01                |
| 1,90E-08                     | 9,19E-01                    | 2,03E-09                |
| 1,92E-10                     | 2,84E-01                    | 4,21E-13                |
| 5,88E-09                     | 9,09E-01                    | 2,64E-12                |
| 3,91E-06                     | 5,20E-01                    | 1,57E-10                |
| 2,08E-09                     | 6,99E-01                    | 4,57E-13                |

|       |                         |                      |          |          |          |
|-------|-------------------------|----------------------|----------|----------|----------|
| GMC01 | Open_field_Parameter    | center_time_1        | 9,02E-11 | 2,52E-02 | 2,95E-06 |
| GMC01 | Open_field_Parameter    | center_time_2        | 2,63E-11 | 7,13E-01 | 1,23E-11 |
| GMC01 | Open_field_Parameter    | center_time_3        | 1,14E-09 | 3,08E-02 | 1,94E-05 |
| GMC01 | Open_field_Parameter    | center_time_4        | 1,13E-06 | 3,08E-01 | 6,67E-05 |
| GMC01 | Open_field_Parameter    | center_time_total    | 3,43E-11 | 9,76E-02 | 5,66E-08 |
| GMC01 | Open_field_Parameter    | periphery_distance   | 4,01E-04 | 6,77E-02 | 1,28E-01 |
| GMC01 | Open_field_Parameter    | periphery_rest       | 1,21E-10 | 3,92E-13 | 3,92E-13 |
| GMC01 | Open_field_Parameter    | periphery_permanence | 3,44E-11 | 9,72E-02 | 5,74E-08 |
| GMC01 | Open_field_Parameter    | periphery_speed      | 1,11E-06 | 1,62E-02 | 1,21E-02 |
| GMC02 | Grip_strength_Parameter | front_paws1          | 7,24E-01 | 3,96E-13 | 3,93E-13 |
| GMC02 | Grip_strength_Parameter | front_paws2          | 8,20E-01 | 4,04E-13 | 3,92E-13 |
| GMC02 | Grip_strength_Parameter | front_paws3          | 9,08E-01 | 4,15E-13 | 3,92E-13 |
| GMC02 | Grip_strength_Parameter | front_paws_mean      | 9,96E-01 | 3,93E-13 | 3,92E-13 |
| GMC02 | Grip_strength_Parameter | front_paws_adj       | 4,30E-13 | 3,93E-13 | 6,35E-04 |
| GMC02 | Grip_strength_Parameter | all_paws1            | 2,88E-01 | 3,21E-13 | 3,21E-13 |
| GMC02 | Grip_strength_Parameter | all_paws2            | 1,36E-01 | 3,21E-13 | 3,21E-13 |
| GMC02 | Grip_strength_Parameter | all_paws3            | 1,72E-02 | 3,21E-13 | 3,21E-13 |
| GMC02 | Grip_strength_Parameter | all_paws_mean        | 7,96E-02 | 3,21E-13 | 3,21E-13 |
| GMC02 | Grip_strength_Parameter | all_paws_adj         | 8,22E-13 | 3,25E-13 | 2,32E-04 |
| GMC03 | SHIRPA_Parameter        | coat_app             | 1,06E-03 | 1,92E-07 | 1,07E-01 |
| GMC03 | SHIRPA_Parameter        | whiskers             | 4,88E-13 | 1,00E+00 | 2,50E-13 |
| GMC03 | SHIRPA_Parameter        | body_pos             | 2,63E-01 | 5,69E-02 | 6,22E-05 |
| GMC03 | SHIRPA_Parameter        | pelvic_elev          | 6,58E-01 | 5,28E-06 | 2,10E-09 |
| GMC03 | SHIRPA_Parameter        | tail_elev            | 4,28E-01 | 7,13E-06 | 3,44E-04 |
| GMC03 | SHIRPA_Parameter        | transfer_arousal     | 9,93E-01 | 4,64E-08 | 3,24E-09 |
| GMC03 | SHIRPA_Parameter        | defecation           | 1,00E+00 | 4,30E-02 | 2,18E-02 |
| GMC03 | SHIRPA_Parameter        | urinate              | 3,13E-01 | 1,51E-02 | 3,26E-01 |
| GMC03 | SHIRPA_Parameter        | tremor               | 2,72E-01 | 2,51E-01 | 1,00E+00 |
| GMC03 | SHIRPA_Parameter        | loco_activity        | 5,33E-03 | 4,17E-01 | 3,48E-06 |
| GMC03 | SHIRPA_Parameter        | bite_evidence        | 9,19E-01 | 6,22E-04 | 1,98E-05 |
| GMC03 | SHIRPA_Parameter        | vocalization         | 8,54E-01 | 6,31E-02 | 5,84E-03 |
| GMC03 | SHIRPA_Parameter        | palebral_closure     | NA       | NA       | NA       |
| GMC03 | SHIRPA_Parameter        | lacrimation          | NA       | NA       | NA       |
| GMC03 | SHIRPA_Parameter        | startle_response     | 4,07E-03 | 2,97E-03 | 7,77E-12 |
| GMC03 | SHIRPA_Parameter        | limb_grasping        | NA       | NA       | NA       |
| GMC03 | SHIRPA_Parameter        | trunk_curl           | NA       | NA       | NA       |
| GMC03 | SHIRPA_Parameter        | pos_pass             | NA       | NA       | NA       |
| GMC03 | SHIRPA_Parameter        | gait                 | 1,00E+00 | 6,00E-01 | 5,36E-01 |

|       |                               |                   |          |          |          |
|-------|-------------------------------|-------------------|----------|----------|----------|
| GMC03 | SHIRPA_Parameter              | touch_escape      | 1,00E+00 | 7,17E-05 | 9,88E-06 |
| GMC03 | SHIRPA_Parameter              | pinna_reflex      | NA       | NA       | NA       |
| GMC03 | SHIRPA_Parameter              | cornea_reflex     | NA       | NA       | NA       |
| GMC03 | SHIRPA_Parameter              | righting_reflex   | NA       | NA       | NA       |
| GMC03 | SHIRPA_Parameter              | num_mice_per_cage | 1,54E-01 | 1,28E-04 | 3,40E-10 |
| GMC03 | SHIRPA_Parameter              | deafness          | 4,76E-01 | 2,33E-04 | 2,51E-07 |
| GMC04 | Rotarod_Parameter             | LatFall_1         | 9,68E-01 | 2,47E-01 | 1,15E-01 |
| GMC04 | Rotarod_Parameter             | LatFall_2         | 9,09E-02 | 3,25E-01 | 6,46E-04 |
| GMC04 | Rotarod_Parameter             | LatFall_3         | 5,23E-02 | 8,09E-01 | 5,95E-03 |
| GMC04 | Rotarod_Parameter             | LatFall_mean      | 1,18E-01 | 2,98E-01 | 8,22E-04 |
| GMC05 | Acoustic_Startle_Parameter    | ASR_bn            | 3,54E-01 | 1,25E-01 | 6,61E-04 |
| GMC05 | Acoustic_Startle_Parameter    | ASR_70            | 1,62E-02 | 9,90E-01 | 8,67E-03 |
| GMC05 | Acoustic_Startle_Parameter    | ASR_80            | 5,92E-01 | 9,04E-01 | 8,05E-01 |
| GMC05 | Acoustic_Startle_Parameter    | ASR_85            | 2,60E-01 | 9,79E-02 | 8,58E-01 |
| GMC05 | Acoustic_Startle_Parameter    | ASR_90            | 1,07E-03 | 8,43E-08 | 5,92E-02 |
| GMC05 | Acoustic_Startle_Parameter    | ASR_100           | 9,56E-07 | 5,26E-13 | 1,69E-02 |
| GMC05 | Acoustic_Startle_Parameter    | ASR_110           | 1,38E-05 | 3,07E-13 | 7,62E-04 |
| GMC05 | Acoustic_Startle_Parameter    | ASR_120           | 7,14E-06 | 1,45E-13 | 4,99E-04 |
| GMC05 | Acoustic_Startle_Parameter    | ASR_PP_67         | 3,49E-13 | 2,72E-13 | 4,59E-01 |
| GMC05 | Acoustic_Startle_Parameter    | ASR_PP_69         | 2,75E-13 | 2,72E-13 | 6,97E-01 |
| GMC05 | Acoustic_Startle_Parameter    | ASR_PP_73         | 2,72E-13 | 2,71E-13 | 9,55E-01 |
| GMC05 | Acoustic_Startle_Parameter    | ASR_PP_81         | 2,75E-13 | 2,73E-13 | 9,82E-01 |
| GMC05 | Acoustic_Startle_Parameter    | PPI_67            | 1,58E-05 | 1,79E-03 | 3,05E-01 |
| GMC05 | Acoustic_Startle_Parameter    | PPI_69            | 1,37E-03 | 3,71E-03 | 8,96E-01 |
| GMC05 | Acoustic_Startle_Parameter    | PPI_73            | 6,77E-02 | 1,06E-01 | 9,53E-01 |
| GMC05 | Acoustic_Startle_Parameter    | PPI_81            | 2,14E-01 | 5,26E-01 | 7,50E-01 |
| GMC05 | Acoustic_Startle_Parameter    | PPI_global        | 4,04E-03 | 2,44E-02 | 7,20E-01 |
| GMC05 | Acoustic_Startle_Parameter    | ASR_ISI_5         | 1,29E-13 | 1,93E-13 | 5,95E-01 |
| GMC05 | Acoustic_Startle_Parameter    | ASR_ISI_25        | 1,29E-13 | 1,29E-13 | 9,61E-01 |
| GMC05 | Acoustic_Startle_Parameter    | ASR_ISI_100       | 1,65E-11 | 1,29E-13 | 1,39E-01 |
| GMC05 | Acoustic_Startle_Parameter    | PPI_ISI_5         | 1,34E-05 | 8,69E-01 | 4,25E-08 |
| GMC05 | Acoustic_Startle_Parameter    | PPI_ISI_25        | 5,35E-05 | 5,16E-02 | 5,38E-02 |
| GMC05 | Acoustic_Startle_Parameter    | PPI_ISI_100       | 1,10E-02 | 7,66E-03 | 9,97E-01 |
| GMC06 | Blood_After_Fasting_Parameter | GLU               | 7,81E-07 | NA       | NA       |
| GMC06 | Blood_After_Fasting_Parameter | Glycerol          | 2,83E-02 | NA       | NA       |
| GMC06 | Blood_After_Fasting_Parameter | CHOL              | 5,37E-09 | NA       | NA       |
| GMC06 | Blood_After_Fasting_Parameter | HDL               | 5,76E-06 | NA       | NA       |
| GMC06 | Blood_After_Fasting_Parameter | nonHDL            | 9,43E-12 | NA       | NA       |

|       |                                     |                   |          |          |          |
|-------|-------------------------------------|-------------------|----------|----------|----------|
| GMC06 | Blood_After_Fasting_Parameter       | NEFA              | 1,99E-02 | NA       | NA       |
| GMC06 | Blood_After_Fasting_Parameter       | TG                | 4,99E-06 | NA       | NA       |
| GMC07 | Hot_plate_Parameter                 | latency_1         | 9,70E-01 | 9,69E-01 | 1,00E+00 |
| GMC07 | Hot_plate_Parameter                 | latency_2         | 1,21E-03 | 1,18E-06 | 2,14E-01 |
| GMC07 | Hot_plate_Parameter                 | response_1        | 2,97E-01 | 5,16E-01 | 1,10E-02 |
| GMC07 | Hot_plate_Parameter                 | response_2        | 1,61E-03 | 1,60E-04 | 8,41E-01 |
| GMC08 | Transepidermal_water_loss_Parameter | TEWL              | 5,55E-01 | 4,67E-03 | 1,36E-05 |
| GMC08 | Transepidermal_water_loss_Parameter | TEWL_adj          | 4,63E-01 | 2,81E-09 | 2,63E-13 |
| GMC08 | Transepidermal_water_loss_Parameter | TEWL_daily_mean   | 8,66E-01 | 9,99E-01 | 8,08E-01 |
| GMC08 | Transepidermal_water_loss_Parameter | TEWL_ambient_temp | 9,37E-01 | 5,28E-01 | 7,04E-01 |
| GMC08 | Transepidermal_water_loss_Parameter | TEWL_rel_humidity | 9,64E-01 | 8,32E-01 | 9,36E-01 |
| GMC08 | Transepidermal_water_loss_Parameter | TEWL_CV           | 5,62E-01 | 4,47E-03 | 1,35E-05 |
| GMC08 | Transepidermal_water_loss_Parameter | SSWL              | 3,72E-01 | 9,38E-01 | 1,41E-01 |
| GMC09 | Calorimetry_Parameter               | food              | 3,48E-12 | 2,11E-07 | 5,55E-02 |
| GMC09 | Calorimetry_Parameter               | water             | 2,05E-04 | 1,31E-05 | 8,08E-01 |
| GMC09 | Calorimetry_Parameter               | VO2_mean          | 2,30E-13 | 2,30E-13 | 1,97E-01 |
| GMC09 | Calorimetry_Parameter               | VCO2_mean         | 2,30E-13 | 2,30E-13 | 1,16E-01 |
| GMC09 | Calorimetry_Parameter               | RER_mean          | 3,76E-01 | 9,56E-01 | 4,58E-01 |
| GMC09 | Calorimetry_Parameter               | heat_mean         | 2,30E-13 | 2,30E-13 | 1,61E-01 |
| GMC09 | Calorimetry_Parameter               | breaks_X_mean     | 1,47E-02 | 8,14E-01 | 3,53E-02 |
| GMC09 | Calorimetry_Parameter               | breaks_XA_mean    | 1,34E-02 | 6,33E-01 | 7,33E-02 |
| GMC09 | Calorimetry_Parameter               | breaks_XF_mean    | 5,39E-02 | 2,48E-01 | 4,93E-05 |
| GMC09 | Calorimetry_Parameter               | breaks_YA_mean    | 1,68E-03 | 5,90E-01 | 2,99E-06 |
| GMC09 | Calorimetry_Parameter               | breaks_YF_mean    | 1,82E-03 | 8,77E-03 | 1,97E-11 |
| GMC09 | Calorimetry_Parameter               | breaks_Z_mean     | 1,03E-03 | 3,89E-03 | 1,35E-12 |
| GMC09 | Calorimetry_Parameter               | distance_mean     | 1,34E-01 | 2,76E-03 | 4,24E-08 |
| GMC09 | Calorimetry_Parameter               | speed_mean        | 1,31E-01 | 2,95E-03 | 4,43E-08 |
| GMC10 | Minispec_NMR_13_Parameter           | fat_13wk          | 1,77E-13 | 1,73E-13 | 3,01E-06 |
| GMC10 | Minispec_NMR_13_Parameter           | lean_13wk         | 1,73E-13 | 1,73E-13 | 1,88E-13 |
| GMC10 | Minispec_NMR_19_Parameter           | fat_19wk          | 1,15E-13 | 8,84E-14 | 2,48E-03 |
| GMC10 | Minispec_NMR_19_Parameter           | lean_19wk         | 1,16E-13 | 8,84E-14 | 1,16E-13 |
| GMC11 | IGTT_Parameter                      | GLU_0             | 8,02E-03 | 4,06E-02 | 1,66E-04 |
| GMC11 | IGTT_Parameter                      | GLU_15            | 9,99E-01 | 1,27E-01 | 1,21E-01 |
| GMC11 | IGTT_Parameter                      | GLU_30            | 1,44E-01 | 4,81E-01 | 9,86E-01 |
| GMC11 | IGTT_Parameter                      | GLU_60            | 9,05E-08 | 3,20E-03 | 9,73E-01 |
| GMC11 | IGTT_Parameter                      | GLU_120           | 2,82E-12 | 1,88E-02 | 3,64E-01 |
| GMC11 | IGTT_Parameter                      | GLU_vol_inj       | 0,00E+00 | 7,69E-13 | 1,00E-01 |
| GMC11 | IGTT_Parameter                      | AUC_by_HAMED      | 1,31E-05 | 9,00E-14 | 9,00E-14 |

|       |                             |                     |          |          |          |
|-------|-----------------------------|---------------------|----------|----------|----------|
| GMC12 | Echocardiography_Parameter  | resp_rate           | 9,78E-02 | 2,33E-02 | 8,81E-01 |
| GMC12 | Echocardiography_Parameter  | heart_rate          | 4,67E-01 | 2,53E-02 | 2,68E-01 |
| GMC12 | Echocardiography_Parameter  | LV_mass             | 3,82E-08 | 3,74E-05 | 2,09E-01 |
| GMC12 | Echocardiography_Parameter  | fract_shortening    | 4,63E-01 | 2,49E-02 | 1,02E-04 |
| GMC12 | Echocardiography_Parameter  | EJ_fraction         | 8,66E-01 | 1,13E-04 | 1,31E-06 |
| GMC12 | Echocardiography_Parameter  | stroke_vol          | 1,83E-10 | 1,68E-07 | 2,90E-01 |
| GMC12 | Echocardiography_Parameter  | cardiac_output      | 1,93E-14 | 1,84E-14 | 6,69E-01 |
| GMC12 | Echocardiography_Parameter  | IVS_diastole        | 4,11E-02 | 1,44E-08 | 3,26E-04 |
| GMC12 | Echocardiography_Parameter  | IVS_systole         | 1,10E-03 | 9,75E-08 | 6,91E-02 |
| GMC12 | Echocardiography_Parameter  | LVID_diastole       | 6,52E-07 | 6,14E-03 | 2,89E-02 |
| GMC12 | Echocardiography_Parameter  | LVID_systole        | 6,54E-02 | 2,87E-01 | 1,16E-04 |
| GMC12 | Echocardiography_Parameter  | LVPW_diastole       | 1,84E-01 | 2,42E-04 | 4,30E-02 |
| GMC12 | Echocardiography_Parameter  | LVPW_systole        | 1,35E-02 | 1,00E-05 | 1,06E-01 |
| GMC13 | Electrocardiogram_Parameter | num_ECG_signals     | 8,25E-01 | 2,82E-03 | 1,46E-04 |
| GMC13 | Electrocardiogram_Parameter | HR                  | 1,12E-04 | 1,21E-13 | 0,00E+00 |
| GMC13 | Electrocardiogram_Parameter | HR_V                | 3,03E-01 | 6,53E-01 | 9,65E-01 |
| GMC13 | Electrocardiogram_Parameter | HR_CV               | 3,18E-01 | 5,91E-01 | 9,92E-01 |
| GMC13 | Electrocardiogram_Parameter | RR                  | 1,94E-04 | 5,12E-12 | 0,00E+00 |
| GMC13 | Electrocardiogram_Parameter | PQ                  | 7,49E-01 | 5,68E-10 | 4,24E-10 |
| GMC13 | Electrocardiogram_Parameter | PR                  | 5,54E-01 | 5,74E-09 | 2,07E-08 |
| GMC13 | Electrocardiogram_Parameter | QRS                 | 3,43E-01 | 8,59E-01 | 1,97E-01 |
| GMC13 | Electrocardiogram_Parameter | QT                  | 7,38E-01 | 1,80E-04 | 2,44E-06 |
| GMC13 | Electrocardiogram_Parameter | ST                  | 5,15E-01 | 5,16E-05 | 1,18E-07 |
| GMC13 | Electrocardiogram_Parameter | QTc                 | 8,81E-01 | 5,15E-02 | 7,71E-02 |
| GMC13 | Electrocardiogram_Parameter | QT_dispersion       | 3,76E-01 | 8,26E-01 | 8,92E-01 |
| GMC13 | Electrocardiogram_Parameter | QTc_dispersion      | 7,21E-01 | 6,91E-01 | 9,63E-01 |
| GMC13 | Electrocardiogram_Parameter | SR_amplitude        | 1,46E-03 | 6,44E-01 | 1,31E-01 |
| GMC13 | Electrocardiogram_Parameter | R_amplitude         | 8,73E-04 | 9,59E-01 | 1,88E-02 |
| GMC13 | Electrocardiogram_Parameter | rMSSD               | 6,24E-01 | 9,42E-01 | 9,01E-01 |
| GMC13 | Electrocardiogram_Parameter | pNN50               | 5,69E-01 | 3,21E-01 | 7,42E-01 |
| GMC14 | Eye_size_Parameter          | body_length         | 1,75E-14 | 0,00E+00 | 0,00E+00 |
| GMC14 | Eye_size_Parameter          | eye_length_L        | 0,00E+00 | 0,00E+00 | 0,00E+00 |
| GMC14 | Eye_size_Parameter          | eye_length_R        | 4,12E-14 | 4,12E-14 | 4,14E-14 |
| GMC14 | Eye_size_Parameter          | lens_min_density_L  | 4,20E-03 | 3,28E-04 | 4,15E-11 |
| GMC14 | Eye_size_Parameter          | lens_min_density_R  | 1,19E-01 | 2,52E-04 | 1,96E-08 |
| GMC14 | Eye_size_Parameter          | lens_max_density_L  | 8,92E-03 | 2,54E-02 | 9,95E-01 |
| GMC14 | Eye_size_Parameter          | lens_max_density_R  | 9,72E-04 | 4,86E-01 | 9,75E-02 |
| GMC14 | Eye_size_Parameter          | lens_mean_density_L | 7,12E-06 | 5,45E-02 | 1,71E-10 |

|       |                                      |                     |          |          |          |
|-------|--------------------------------------|---------------------|----------|----------|----------|
| GMC14 | Eye_size_Parameter                   | lens_mean_density_R | 3,56E-04 | 1,68E-02 | 1,91E-09 |
| GMC14 | Eye_size_Parameter                   | fundus_vessels_L    | 5,85E-01 | 8,41E-03 | 2,81E-04 |
| GMC14 | Eye_size_Parameter                   | fundus_vessels_R    | 9,98E-01 | 1,36E-05 | 4,89E-06 |
| GMC14 | Eye_size_Parameter                   | retinal_thickness_L | 8,96E-14 | 6,24E-01 | 2,42E-13 |
| GMC14 | Eye_size_Parameter                   | retinal_thickness_R | 0,00E+00 | 7,71E-02 | 2,61E-07 |
| GMC14 | Eye_size_Parameter                   | spatial_freq        | 1,09E-08 | NA       | NA       |
| GMC15 | Hematology_Week_21_Parameter         | WBC                 | 8,58E-02 | 6,72E-01 | 3,25E-01 |
| GMC15 | Hematology_Week_21_Parameter         | RBC                 | 1,61E-02 | 3,06E-01 | 3,03E-01 |
| GMC15 | Hematology_Week_21_Parameter         | RDW                 | 2,36E-05 | 6,89E-10 | 4,95E-02 |
| GMC15 | Hematology_Week_21_Parameter         | MCV                 | 9,27E-04 | 4,88E-12 | 5,68E-05 |
| GMC15 | Hematology_Week_21_Parameter         | MCH                 | 1,04E-01 | 1,68E-04 | 5,56E-02 |
| GMC15 | Hematology_Week_21_Parameter         | MCHC                | 2,26E-02 | 6,19E-09 | 1,99E-04 |
| GMC15 | Hematology_Week_21_Parameter         | HGB                 | 3,44E-04 | 1,34E-03 | 9,04E-01 |
| GMC15 | Hematology_Week_21_Parameter         | HCT                 | 2,17E-06 | 2,20E-08 | 5,57E-01 |
| GMC15 | Hematology_Week_21_Parameter         | PLT                 | 4,00E-03 | 3,82E-07 | 3,34E-02 |
| GMC15 | Hematology_Week_21_Parameter         | MPV                 | 1,91E-12 | 7,11E-15 | 6,48E-02 |
| GMC15 | Hematology_Week_21_Parameter         | PDW                 | 1,48E-12 | 8,55E-15 | 4,70E-01 |
| GMC15 | Hematology_Week_21_Parameter         | PLCR                | 6,66E-10 | 1,53E-08 | 7,72E-01 |
| GMC15 | Hematology_Week_21_Parameter         | PCT                 | 2,47E-06 | 1,76E-12 | 8,67E-03 |
| GMC16 | Clinical_chemistry_week_17_Parameter | calcium_17          | 4,53E-01 | 2,59E-04 | 1,66E-03 |
| GMC16 | Clinical_chemistry_week_17_Parameter | chloride_17         | 2,75E-05 | 1,05E-01 | 4,27E-01 |
| GMC16 | Clinical_chemistry_week_17_Parameter | iron_17             | 4,95E-01 | 1,32E-02 | 5,83E-02 |
| GMC16 | Clinical_chemistry_week_17_Parameter | lactate_17          | 7,34E-01 | 4,72E-03 | 7,44E-04 |
| GMC16 | Clinical_chemistry_week_17_Parameter | phosphate_17        | 2,45E-02 | 5,77E-01 | 7,39E-01 |
| GMC16 | Clinical_chemistry_week_17_Parameter | potassium_17        | 1,86E-02 | 9,02E-02 | 9,37E-01 |
| GMC16 | Clinical_chemistry_week_17_Parameter | sodium_17           | 2,29E-01 | 8,85E-01 | 7,97E-01 |
| GMC16 | Clinical_chemistry_week_17_Parameter | ALP_17              | 6,67E-02 | 6,77E-02 | 6,56E-01 |
| GMC16 | Clinical_chemistry_week_17_Parameter | ALT_17              | 9,35E-01 | 5,04E-01 | 3,34E-01 |
| GMC16 | Clinical_chemistry_week_17_Parameter | AST_17              | 4,17E-01 | 9,97E-01 | 7,07E-01 |
| GMC16 | Clinical_chemistry_week_17_Parameter | LDH_17              | 1,85E-01 | 9,33E-01 | 2,80E-01 |
| GMC16 | Clinical_chemistry_week_17_Parameter | amylase_17          | 7,70E-03 | 1,90E-03 | 2,01E-01 |
| GMC16 | Clinical_chemistry_week_17_Parameter | GLU_17              | 5,89E-01 | 6,35E-01 | 9,51E-01 |
| GMC16 | Clinical_chemistry_week_17_Parameter | creatinine_17       | 4,98E-02 | 5,26E-01 | 2,22E-02 |
| GMC16 | Clinical_chemistry_week_17_Parameter | albumin_17          | 1,51E-02 | 1,20E-02 | 2,61E-05 |
| GMC16 | Clinical_chemistry_week_17_Parameter | total_protein_17    | 8,23E-01 | 2,05E-03 | 3,77E-03 |
| GMC16 | Clinical_chemistry_week_17_Parameter | urea_17             | 5,56E-02 | 7,79E-01 | 7,16E-02 |
| GMC16 | Clinical_chemistry_week_17_Parameter | CHOL_17             | 7,43E-03 | 2,58E-01 | 9,03E-01 |
| GMC16 | Clinical_chemistry_week_17_Parameter | TG_17               | 3,80E-05 | 2,98E-03 | 9,22E-01 |

|       |                                           |                      |          |          |          |
|-------|-------------------------------------------|----------------------|----------|----------|----------|
| GMC16 | Clinical_chemistry_week_21_Parameter      | calcium_21           | 6,47E-01 | 2,56E-08 | 9,78E-08 |
| GMC16 | Clinical_chemistry_week_21_Parameter      | chloride_21          | 3,79E-08 | 0,00E+00 | 1,32E-08 |
| GMC16 | Clinical_chemistry_week_21_Parameter      | iron_21              | 9,32E-01 | 9,66E-04 | 7,54E-04 |
| GMC16 | Clinical_chemistry_week_21_Parameter      | iron_binding_21      | 5,31E-01 | 5,02E-01 | 9,94E-01 |
| GMC16 | Clinical_chemistry_week_21_Parameter      | lactate_21           | 5,55E-02 | 1,26E-03 | 1,23E-09 |
| GMC16 | Clinical_chemistry_week_21_Parameter      | phosphate_21         | 5,37E-02 | 7,76E-01 | 2,51E-03 |
| GMC16 | Clinical_chemistry_week_21_Parameter      | potassium_21         | 6,33E-01 | 1,00E+00 | 5,49E-01 |
| GMC16 | Clinical_chemistry_week_21_Parameter      | sodium_21            | 5,36E-01 | 4,76E-01 | 9,93E-01 |
| GMC16 | Clinical_chemistry_week_21_Parameter      | ALP_21               | 8,54E-01 | 6,40E-05 | 8,57E-05 |
| GMC16 | Clinical_chemistry_week_21_Parameter      | ALT_21               | 8,95E-01 | 4,20E-01 | 1,37E-01 |
| GMC16 | Clinical_chemistry_week_21_Parameter      | AST_21               | 1,32E-01 | 7,62E-02 | 9,34E-01 |
| GMC16 | Clinical_chemistry_week_21_Parameter      | LDH_21               | 6,46E-02 | 1,08E-01 | 9,74E-01 |
| GMC16 | Clinical_chemistry_week_21_Parameter      | amylase_21           | 1,34E-03 | 9,66E-15 | 1,08E-12 |
| GMC16 | Clinical_chemistry_week_21_Parameter      | GLU_21               | 5,77E-06 | 2,81E-03 | 1,78E-01 |
| GMC16 | Clinical_chemistry_week_21_Parameter      | albumin_21           | 2,22E-01 | 9,86E-04 | 2,57E-08 |
| GMC16 | Clinical_chemistry_week_21_Parameter      | creatinine_21        | 9,12E-01 | 9,48E-01 | 6,98E-01 |
| GMC16 | Clinical_chemistry_week_21_Parameter      | total_protein_21     | 9,85E-01 | 4,04E-14 | 0,00E+00 |
| GMC16 | Clinical_chemistry_week_21_Parameter      | urea_21              | 7,16E-01 | 2,22E-07 | 5,64E-07 |
| GMC16 | Clinical_chemistry_week_21_Parameter      | CHOL_21              | 1,14E-11 | 1,54E-14 | 1,70E-01 |
| GMC16 | Clinical_chemistry_week_21_Parameter      | TG_21                | 1,49E-09 | 5,35E-07 | 3,87E-01 |
| GMC17 | ABR_Parameter                             | click                | 9,67E-08 | 2,85E-13 | 3,00E-05 |
| GMC17 | ABR_Parameter                             | pip_6                | 7,07E-05 | 3,78E-07 | 1,38E-02 |
| GMC17 | ABR_Parameter                             | pip_12               | 8,99E-10 | 2,34E-11 | 4,88E-03 |
| GMC17 | ABR_Parameter                             | pip_18               | 9,84E-11 | 3,04E-13 | 9,21E-04 |
| GMC17 | ABR_Parameter                             | pip_24               | 9,66E-07 | 1,37E-13 | 4,59E-06 |
| GMC17 | ABR_Parameter                             | pip_30               | 1,57E-02 | 7,07E-12 | 3,48E-08 |
| GMC17 | ABR_Parameter                             | Extens_stimulus_lvls | NA       | NA       | NA       |
| GMC18 | Dual_Energy_Xray_Absorptiometry_Parameter | body_length          | 2,08E-14 | 2,25E-14 | 3,91E-10 |
| GMC18 | Dual_Energy_Xray_Absorptiometry_Parameter | body_size            | 0,00E+00 | 0,00E+00 | 2,17E-04 |
| GMC18 | Dual_Energy_Xray_Absorptiometry_Parameter | body_type            | 1,20E-07 | 1,91E-13 | 5,36E-05 |
| GMC18 | Dual_Energy_Xray_Absorptiometry_Parameter | FATmass_Xhead        | 7,69E-14 | 1,40E-03 | 8,94E-01 |
| GMC18 | Dual_Energy_Xray_Absorptiometry_Parameter | FATmass_wholebody    | 7,99E-14 | 1,34E-03 | 8,84E-01 |
| GMC18 | Dual_Energy_Xray_Absorptiometry_Parameter | LEANmass_Xhead       | 5,13E-01 | 3,30E-02 | 9,46E-02 |
| GMC18 | Dual_Energy_Xray_Absorptiometry_Parameter | LEANmass_wholebody   | 8,45E-01 | 9,50E-02 | 1,46E-01 |
| GMC18 | Dual_Energy_Xray_Absorptiometry_Parameter | SOFTmass_Xhead       | 4,57E-14 | 2,67E-08 | 2,28E-01 |
| GMC18 | Dual_Energy_Xray_Absorptiometry_Parameter | SOFTmass_wholebody   | 4,47E-14 | 1,49E-08 | 2,02E-01 |
| GMC18 | Dual_Energy_Xray_Absorptiometry_Parameter | BMD_Xhead            | 4,03E-02 | 6,53E-02 | 4,38E-01 |
| GMC18 | Dual_Energy_Xray_Absorptiometry_Parameter | BMD_wholebody        | 9,73E-01 | 1,99E-01 | 2,24E-01 |

|       |                                           |                       |          |          |          |
|-------|-------------------------------------------|-----------------------|----------|----------|----------|
| GMC18 | Dual_Energy_Xray_Absorptiometry_Parameter | bone_area_Xhead       | 3,01E-14 | 3,31E-09 | 2,39E-01 |
| GMC18 | Dual_Energy_Xray_Absorptiometry_Parameter | bone_area_wholebody   | 2,83E-14 | 1,62E-09 | 2,06E-01 |
| GMC18 | Dual_Energy_Xray_Absorptiometry_Parameter | bone_mass_Xhead       | 4,71E-14 | 2,13E-07 | 4,02E-01 |
| GMC18 | Dual_Energy_Xray_Absorptiometry_Parameter | bone_mass_wholebody   | 4,87E-14 | 1,11E-07 | 2,84E-01 |
| GMC18 | Dual_Energy_Xray_Absorptiometry_Parameter | lumbar_num            | 1,56E-04 | 1,00E+00 | 8,09E-03 |
| GMC19 | Lung_function_Parameter                   | residual_vol          | 2,16E-01 | 1,61E-01 | 8,55E-01 |
| GMC19 | Lung_function_Parameter                   | expiratory_vol        | 6,75E-01 | 6,20E-02 | 1,24E-01 |
| GMC19 | Lung_function_Parameter                   | forced_expiratory_vol | 9,86E-01 | 4,35E-03 | 5,56E-04 |
| GMC19 | Lung_function_Parameter                   | tidal_vol             | 4,31E-01 | 2,64E-01 | 8,82E-01 |
| GMC19 | Lung_function_Parameter                   | lung_capacity         | 7,84E-01 | 1,80E-03 | 1,45E-03 |
| GMC19 | Lung_function_Parameter                   | vital_capacity        | 9,43E-01 | 2,30E-03 | 6,52E-04 |
| GMC19 | Lung_function_Parameter                   | forced_capacity       | 9,64E-01 | 3,37E-03 | 1,06E-03 |
| GMC19 | Lung_function_Parameter                   | inspiratory_capacity  | 9,98E-01 | 1,67E-02 | 4,82E-03 |
| GMC19 | Lung_function_Parameter                   | residual_capacity     | 5,60E-01 | 8,70E-01 | 2,88E-01 |
| GMC19 | Lung_function_Parameter                   | chord_compliance      | 5,57E-01 | 2,89E-02 | 5,19E-04 |
| GMC19 | Lung_function_Parameter                   | dynamic_compliance    | 5,87E-01 | 2,06E-07 | 5,25E-07 |
| GMC19 | Lung_function_Parameter                   | resistance            | 7,66E-01 | 4,99E-04 | 2,71E-05 |
| GMC19 | Lung_function_Parameter                   | peak_flow             | 2,84E-01 | 9,32E-01 | 5,06E-01 |
| GMC20 | All_immunoglobulins_week_17_21_Parameter  | IgM_17                | 4,05E-05 | 1,13E-04 | 2,72E-01 |
| GMC20 | All_immunoglobulins_week_17_21_Parameter  | IgM_21                | 1,44E-06 | 4,43E-08 | 5,34E-01 |
| GMC20 | All_immunoglobulins_week_17_21_Parameter  | IgA_17                | 2,52E-01 | 1,91E-01 | 6,67E-01 |
| GMC20 | All_immunoglobulins_week_17_21_Parameter  | IgA_21                | 7,21E-01 | 3,23E-01 | 5,97E-01 |
| GMC20 | All_immunoglobulins_week_17_21_Parameter  | IgG1_17               | 4,46E-01 | 6,89E-01 | 9,12E-01 |
| GMC20 | All_immunoglobulins_week_17_21_Parameter  | IgG1_21               | 9,61E-01 | 5,18E-01 | 1,49E-01 |
| GMC20 | All_immunoglobulins_week_17_21_Parameter  | IgG2a_17              | 5,34E-01 | 6,39E-01 | 2,65E-01 |
| GMC20 | All_immunoglobulins_week_17_21_Parameter  | IgG2a_21              | 3,70E-02 | 4,14E-01 | 3,39E-05 |
| GMC20 | All_immunoglobulins_week_17_21_Parameter  | IgG2b_17              | 1,71E-02 | NA       | NA       |
| GMC20 | All_immunoglobulins_week_17_21_Parameter  | IgG2b_21              | 4,65E-02 | 2,71E-05 | 5,59E-03 |
| GMC20 | All_immunoglobulins_week_17_21_Parameter  | IgG3_17               | 2,70E-01 | 2,53E-02 | 1,54E-01 |
| GMC20 | All_immunoglobulins_week_17_21_Parameter  | IgG3_21               | 2,35E-01 | 8,56E-01 | 3,60E-01 |
| GMC20 | All_immunoglobulins_week_17_21_Parameter  | IgE_17                | 9,54E-01 | 7,05E-01 | 5,79E-01 |
| GMC20 | All_immunoglobulins_week_17_21_Parameter  | IgE_21                | 2,60E-02 | 8,42E-01 | 1,06E-03 |
| GMC20 | All_immunoglobulins_week_17_21_Parameter  | aDNA_17               | 1,10E-12 | 3,16E-09 | 8,68E-01 |
| GMC20 | All_immunoglobulins_week_17_21_Parameter  | aDNA_21               | 2,11E-15 | 0,00E+00 | 6,63E-03 |
| GMC20 | All_immunoglobulins_week_17_21_Parameter  | RF_17                 | 4,38E-09 | 1,64E-05 | 9,30E-01 |
| GMC20 | All_immunoglobulins_week_17_21_Parameter  | RF_21                 | 8,69E-12 | 3,01E-14 | 3,39E-01 |
| GMC21 | Organ_weights_at_section_Parameter        | tibia_length          | 9,63E-01 | 6,10E-14 | 6,07E-14 |
| GMC21 | Organ_weights_at_section_Parameter        | heart_wt              | 1,64E-08 | 6,15E-14 | 2,81E-03 |

|       |                                    |           |          |          |          |
|-------|------------------------------------|-----------|----------|----------|----------|
| GMC21 | Organ_weights_at_section_Parameter | liver_wt  | 5,61E-14 | 3,41E-14 | 1,61E-04 |
| GMC21 | Organ_weights_at_section_Parameter | spleen_wt | 0,00E+00 | 0,00E+00 | 3,06E-11 |
