# Supplementary material for: A comprehensive and comparative phenotypic analysis of the collaborative founder strains identifies new and known phenotypes
Source: PubMed Central journal article supplement (PMC7060152; doi:10.1007/s00335-020-09827-3), 2020-02-14
Supplement: 335_2020_9827_MOESM11_ESM.pdf [file 335_2020_9827_MOESM11_ESM.pdf]

Table S6

| Anova model:<br>response~shipment date |                         |                       |          |                          |
|----------------------------------------|-------------------------|-----------------------|----------|--------------------------|
| Protocol                               | Procedure               | Parameter             | Pvalue   | Note                     |
| GMC01                                  | Open_field_Parameter    | distance_1            | 6,67E-01 | NA                       |
| GMC01                                  | Open_field_Parameter    | distance_2            | 2,70E-01 | NA                       |
| GMC01                                  | Open_field_Parameter    | distance_3            | 3,06E-01 | NA                       |
| GMC01                                  | Open_field_Parameter    | distance_4            | 5,53E-01 | NA                       |
| GMC01                                  | Open_field_Parameter    | distance_total        | 4,37E-01 | NA                       |
| GMC01                                  | Open_field_Parameter    | rears_1               | 2,01E-04 | NA                       |
| GMC01                                  | Open_field_Parameter    | rears_2               | 7,16E-05 | NA                       |
| GMC01                                  | Open_field_Parameter    | rears_3               | 1,23E-02 | NA                       |
| GMC01                                  | Open_field_Parameter    | rears_4               | 1,38E-02 | NA                       |
| GMC01                                  | Open_field_Parameter    | rears_total           | 4,48E-04 | NA                       |
| GMC01                                  | Open_field_Parameter    | whole_rest            | 3,26E-03 | NA                       |
| GMC01                                  | Open_field_Parameter    | whole_speed           | 4,43E-01 | NA                       |
| GMC01                                  | Open_field_Parameter    | center_distance       | 4,04E-01 | NA                       |
| GMC01                                  | Open_field_Parameter    | center_rest           | 5,54E-06 | NA                       |
| GMC01                                  | Open_field_Parameter    | center_permanence     | 3,93E-01 | NA                       |
| GMC01                                  | Open_field_Parameter    | center_speed          | 4,57E-02 | NA                       |
| GMC01                                  | Open_field_Parameter    | center_latency        | 1,26E-01 | NA                       |
| GMC01                                  | Open_field_Parameter    | center_entries        | 4,36E-01 | NA                       |
| GMC01                                  | Open_field_Parameter    | center_distance_1     | 6,17E-01 | NA                       |
| GMC01                                  | Open_field_Parameter    | center_distance_2     | 2,76E-01 | NA                       |
| GMC01                                  | Open_field_Parameter    | center_distance_3     | 5,84E-01 | NA                       |
| GMC01                                  | Open_field_Parameter    | center_distance_4     | 9,44E-01 | NA                       |
| GMC01                                  | Open_field_Parameter    | center_distance_total | 6,36E-01 | NA                       |
| GMC01                                  | Open_field_Parameter    | center_time_1         | 5,58E-01 | NA                       |
| GMC01                                  | Open_field_Parameter    | center_time_2         | 5,97E-02 | NA                       |
| GMC01                                  | Open_field_Parameter    | center_time_3         | 4,00E-01 | NA                       |
| GMC01                                  | Open_field_Parameter    | center_time_4         | 7,95E-01 | NA                       |
| GMC01                                  | Open_field_Parameter    | center_time_total     | 3,93E-01 | NA                       |
| GMC01                                  | Open_field_Parameter    | periphery_distance    | 2,74E-01 | NA                       |
| GMC01                                  | Open_field_Parameter    | periphery_rest        | 4,83E-03 | NA                       |
| GMC01                                  | Open_field_Parameter    | periphery_permanence  | 3,93E-01 | NA                       |
| GMC01                                  | Open_field_Parameter    | periphery_speed       | 4,33E-01 | NA                       |
| GMC02                                  | Grip_strength_Parameter | front_paws1           | 3,48E-03 | NA                       |
| GMC02                                  | Grip_strength_Parameter | front_paws2           | 3,04E-02 | NA                       |
| GMC02                                  | Grip_strength_Parameter | front_paws3           | 1,97E-03 | NA                       |
| GMC02                                  | Grip_strength_Parameter | front_paws_mean       | 3,95E-03 | NA                       |
| GMC02                                  | Grip_strength_Parameter | front_paws_adj        | 1,59E-02 | NA                       |
| GMC02                                  | Grip_strength_Parameter | all_paws1             | 3,90E-02 | NA                       |
| GMC02                                  | Grip_strength_Parameter | all_paws2             | 9,20E-02 | NA                       |
| GMC02                                  | Grip_strength_Parameter | all_paws3             | 5,37E-02 | NA                       |
| GMC02                                  | Grip_strength_Parameter | all_paws_mean         | 5,69E-02 | NA                       |
| GMC02                                  | Grip_strength_Parameter | all_paws_adj          | 2,64E-01 | NA                       |
| GMC03                                  | SHIRPA_Parameter        | coat_app              | 1,29E-03 | NA                       |
| GMC03                                  | SHIRPA_Parameter        | whiskers              | 7,57E-01 | NA                       |
| GMC03                                  | SHIRPA_Parameter        | body_pos              | 3,53E-03 | NA                       |
| GMC03                                  | SHIRPA_Parameter        | pelvic_elev           | 1,56E-01 | NA                       |
| GMC03                                  | SHIRPA_Parameter        | tail_elev             | 2,82E-01 | NA                       |
| GMC03                                  | SHIRPA_Parameter        | transfer_arousal      | 6,42E-02 | NA                       |
| GMC03                                  | SHIRPA_Parameter        | defecation            | 1,60E-01 | NA                       |
| GMC03                                  | SHIRPA_Parameter        | urinate               | 2,05E-02 | NA                       |
| GMC03                                  | SHIRPA_Parameter        | tremor                | 4,77E-01 | NA                       |
| GMC03                                  | SHIRPA_Parameter        | loco_activity         | 2,56E-01 | NA                       |
| GMC03                                  | SHIRPA_Parameter        | bite_evidence         | 4,38E-04 | NA                       |
| GMC03                                  | SHIRPA_Parameter        | vocalization          | 4,30E-02 | NA                       |
| GMC03                                  | SHIRPA_Parameter        | palebral_closure      | NA       | No variation in response |

|       |                                     |                   |           |                          |
|-------|-------------------------------------|-------------------|-----------|--------------------------|
| GMC03 | SHIRPA_Parameter                    | lacrimation       | NA        | No variation in response |
| GMC03 | SHIRPA_Parameter                    | startle_response  | 1,21E-02  | NA                       |
| GMC03 | SHIRPA_Parameter                    | limb_grasping     | NA        | No variation in response |
| GMC03 | SHIRPA_Parameter                    | trunk_curl        | NA        | No variation in response |
| GMC03 | SHIRPA_Parameter                    | pos_pass          | NA        | No variation in response |
| GMC03 | SHIRPA_Parameter                    | gait              | 5,51E-01  | NA                       |
| GMC03 | SHIRPA_Parameter                    | touch_escape      | 6,82E-05  | NA                       |
| GMC03 | SHIRPA_Parameter                    | pinna_reflex      | NA        | No variation in response |
| GMC03 | SHIRPA_Parameter                    | cornea_reflex     | NA        | No variation in response |
| GMC03 | SHIRPA_Parameter                    | righting_reflex   | NA        | No variation in response |
| GMC03 | SHIRPA_Parameter                    | num_mice_per_cage | 1,18E-04  | NA                       |
| GMC03 | SHIRPA_Parameter                    | deafness          | 4,18E-01  | NA                       |
| GMC04 | Rotarod_Parameter                   | LatFall_1         | 1,84E-02  | NA                       |
| GMC04 | Rotarod_Parameter                   | LatFall_2         | 7,96E-02  | NA                       |
| GMC04 | Rotarod_Parameter                   | LatFall_3         | 2,74E-02  | NA                       |
| GMC04 | Rotarod_Parameter                   | LatFall_mean      | 8,18E-03  | NA                       |
| GMC05 | Acoustic_Startle_Parameter          | ASR_bn            | 7,56E-04  | NA                       |
| GMC05 | Acoustic_Startle_Parameter          | ASR_70            | 8,93E-02  | NA                       |
| GMC05 | Acoustic_Startle_Parameter          | ASR_80            | 2,97E-01  | NA                       |
| GMC05 | Acoustic_Startle_Parameter          | ASR_85            | 2,44E-01  | NA                       |
| GMC05 | Acoustic_Startle_Parameter          | ASR_90            | 6,78E-01  | NA                       |
| GMC05 | Acoustic_Startle_Parameter          | ASR_100           | 9,78E-01  | NA                       |
| GMC05 | Acoustic_Startle_Parameter          | ASR_110           | 8,38E-01  | NA                       |
| GMC05 | Acoustic_Startle_Parameter          | ASR_120           | 9,71E-01  | NA                       |
| GMC05 | Acoustic_Startle_Parameter          | ASR_PP_67         | 7,28E-01  | NA                       |
| GMC05 | Acoustic_Startle_Parameter          | ASR_PP_69         | 7,04E-01  | NA                       |
| GMC05 | Acoustic_Startle_Parameter          | ASR_PP_73         | 7,95E-01  | NA                       |
| GMC05 | Acoustic_Startle_Parameter          | ASR_PP_81         | 8,66E-01  | NA                       |
| GMC05 | Acoustic_Startle_Parameter          | PPI_67            | 1,06E-02  | NA                       |
| GMC05 | Acoustic_Startle_Parameter          | PPI_69            | 1,56E-02  | NA                       |
| GMC05 | Acoustic_Startle_Parameter          | PPI_73            | 6,18E-02  | NA                       |
| GMC05 | Acoustic_Startle_Parameter          | PPI_81            | 1,44E-01  | NA                       |
| GMC05 | Acoustic_Startle_Parameter          | PPI_global        | 2,46E-02  | NA                       |
| GMC05 | Acoustic_Startle_Parameter          | ASR_ISI_5         | 6,29E-01  | NA                       |
| GMC05 | Acoustic_Startle_Parameter          | ASR_ISI_25        | 5,27E-01  | NA                       |
| GMC05 | Acoustic_Startle_Parameter          | ASR_ISI_100       | 9,04E-01  | NA                       |
| GMC05 | Acoustic_Startle_Parameter          | PPI_ISI_5         | 2,39E-01  | NA                       |
| GMC05 | Acoustic_Startle_Parameter          | PPI_ISI_25        | 2,59E-04  | NA                       |
| GMC05 | Acoustic_Startle_Parameter          | PPI_ISI_100       | 1,11E-02  | NA                       |
| GMC06 | Blood_After_Fasting_Parameter       | GLU               | 2,61E-01  | NA                       |
| GMC06 | Blood_After_Fasting_Parameter       | Glycerol          | 2,84E-25  | NA                       |
| GMC06 | Blood_After_Fasting_Parameter       | CHOL              | 3,92E-01  | NA                       |
| GMC06 | Blood_After_Fasting_Parameter       | HDL               | 5,37E-01  | NA                       |
| GMC06 | Blood_After_Fasting_Parameter       | nonHDL            | 1,02E-02  | NA                       |
| GMC06 | Blood_After_Fasting_Parameter       | NEFA              | 2,55E-30  | NA                       |
| GMC06 | Blood_After_Fasting_Parameter       | TG                | 9,50E-05  | NA                       |
| GMC07 | Hot_plate_Parameter                 | latency_1         | 2,58E-05  | NA                       |
| GMC07 | Hot_plate_Parameter                 | latency_2         | 1,05E-03  | NA                       |
| GMC07 | Hot_plate_Parameter                 | response_1        | 1,17E-22  | NA                       |
| GMC07 | Hot_plate_Parameter                 | response_2        | 4,33E-06  | NA                       |
| GMC08 | Transepidermal_water_loss_Parameter | TEWL              | 3,36E-69  | NA                       |
| GMC08 | Transepidermal_water_loss_Parameter | TEWL_adj          | 1,00E+00  | NA                       |
| GMC08 | Transepidermal_water_loss_Parameter | TEWL_daily_mean   | 0,00E+00  | NA                       |
| GMC08 | Transepidermal_water_loss_Parameter | TEWL_ambient_temp | 3,84E-256 | NA                       |
| GMC08 | Transepidermal_water_loss_Parameter | TEWL_rel_humidity | 1,36E-254 | NA                       |
| GMC08 | Transepidermal_water_loss_Parameter | TEWL_CV           | 9,79E-02  | NA                       |
| GMC08 | Transepidermal_water_loss_Parameter | SSWL              | 1,24E-17  | NA                       |
| GMC09 | Calorimetry_Parameter               | food              | 1,64E-01  | NA                       |
| GMC09 | Calorimetry_Parameter               | water             | 5,12E-03  | NA                       |
| GMC09 | Calorimetry_Parameter               | VO2_mean          | 6,08E-01  | NA                       |
| GMC09 | Calorimetry_Parameter               | VCO2_mean         | 4,38E-01  | NA                       |
| GMC09 | Calorimetry_Parameter               | RER_mean          | 4,33E-04  | NA                       |

|       |                             |                     |          |    |
|-------|-----------------------------|---------------------|----------|----|
| GMC09 | Calorimetry_Parameter       | heat_mean           | 6,79E-01 | NA |
| GMC09 | Calorimetry_Parameter       | breaks_X_mean       | 2,55E-01 | NA |
| GMC09 | Calorimetry_Parameter       | breaks_XA_mean      | 2,11E-01 | NA |
| GMC09 | Calorimetry_Parameter       | breaks_XF_mean      | 4,09E-01 | NA |
| GMC09 | Calorimetry_Parameter       | breaks_YA_mean      | 1,44E-01 | NA |
| GMC09 | Calorimetry_Parameter       | breaks_YF_mean      | 5,77E-02 | NA |
| GMC09 | Calorimetry_Parameter       | breaks_Z_mean       | 2,91E-04 | NA |
| GMC09 | Calorimetry_Parameter       | distance_mean       | 1,64E-04 | NA |
| GMC09 | Calorimetry_Parameter       | speed_mean          | 1,60E-04 | NA |
| GMC10 | Minispec_NMR_13_Parameter   | fat_13wk            | 1,15E-01 | NA |
| GMC10 | Minispec_NMR_13_Parameter   | lean_13wk           | 2,13E-01 | NA |
| GMC10 | Minispec_NMR_19_Parameter   | fat_19wk            | 5,10E-01 | NA |
| GMC10 | Minispec_NMR_19_Parameter   | lean_19wk           | 2,10E-01 | NA |
| GMC11 | IGTT_Parameter              | GLU_0               | 7,41E-02 | NA |
| GMC11 | IGTT_Parameter              | GLU_15              | 5,82E-02 | NA |
| GMC11 | IGTT_Parameter              | GLU_30              | 2,91E-01 | NA |
| GMC11 | IGTT_Parameter              | GLU_60              | 6,88E-01 | NA |
| GMC11 | IGTT_Parameter              | GLU_120             | 9,40E-01 | NA |
| GMC11 | IGTT_Parameter              | GLU_vol_inj         | 7,90E-01 | NA |
| GMC11 | IGTT_Parameter              | AUC_by_HAMED        | 1,68E-03 | NA |
| GMC12 | Echocardiography_Parameter  | resp_rate           | 6,33E-13 | NA |
| GMC12 | Echocardiography_Parameter  | heart_rate          | 4,08E-06 | NA |
| GMC12 | Echocardiography_Parameter  | LV_mass             | 1,63E-09 | NA |
| GMC12 | Echocardiography_Parameter  | fract_shortening    | 4,73E-11 | NA |
| GMC12 | Echocardiography_Parameter  | EJ_fraction         | 8,80E-18 | NA |
| GMC12 | Echocardiography_Parameter  | stroke_vol          | 1,08E-07 | NA |
| GMC12 | Echocardiography_Parameter  | cardiac_output      | 4,78E-01 | NA |
| GMC12 | Echocardiography_Parameter  | IVS_diastole        | 6,36E-10 | NA |
| GMC12 | Echocardiography_Parameter  | IVS_systole         | 8,55E-11 | NA |
| GMC12 | Echocardiography_Parameter  | LVID_diastole       | 7,49E-12 | NA |
| GMC12 | Echocardiography_Parameter  | LVID_systole        | 4,32E-16 | NA |
| GMC12 | Echocardiography_Parameter  | LVPW_diastole       | 1,79E-30 | NA |
| GMC12 | Echocardiography_Parameter  | LVPW_systole        | 3,48E-22 | NA |
| GMC13 | Electrocardiogram_Parameter | num_ECG_signals     | 6,75E-04 | NA |
| GMC13 | Electrocardiogram_Parameter | HR                  | 3,92E-04 | NA |
| GMC13 | Electrocardiogram_Parameter | HR_V                | 4,56E-02 | NA |
| GMC13 | Electrocardiogram_Parameter | HR_CV               | 3,37E-02 | NA |
| GMC13 | Electrocardiogram_Parameter | RR                  | 5,33E-04 | NA |
| GMC13 | Electrocardiogram_Parameter | PQ                  | 2,59E-03 | NA |
| GMC13 | Electrocardiogram_Parameter | PR                  | 1,58E-04 | NA |
| GMC13 | Electrocardiogram_Parameter | QRS                 | 1,43E-02 | NA |
| GMC13 | Electrocardiogram_Parameter | QT                  | 1,12E-03 | NA |
| GMC13 | Electrocardiogram_Parameter | ST                  | 1,13E-05 | NA |
| GMC13 | Electrocardiogram_Parameter | QTc                 | 4,38E-04 | NA |
| GMC13 | Electrocardiogram_Parameter | QT_dispersion       | 3,42E-02 | NA |
| GMC13 | Electrocardiogram_Parameter | QTc_dispersion      | 4,90E-02 | NA |
| GMC13 | Electrocardiogram_Parameter | SR_amplitude        | 1,04E-06 | NA |
| GMC13 | Electrocardiogram_Parameter | R_amplitude         | 6,68E-08 | NA |
| GMC13 | Electrocardiogram_Parameter | rMSSD               | 5,57E-02 | NA |
| GMC13 | Electrocardiogram_Parameter | pNN50               | 6,35E-02 | NA |
| GMC14 | Eye_size_Parameter          | body_length         | 3,69E-02 | NA |
| GMC14 | Eye_size_Parameter          | eye_length_L        | 3,64E-01 | NA |
| GMC14 | Eye_size_Parameter          | eye_length_R        | 5,12E-01 | NA |
| GMC14 | Eye_size_Parameter          | lens_min_density_L  | 5,02E-01 | NA |
| GMC14 | Eye_size_Parameter          | lens_min_density_R  | 4,82E-01 | NA |
| GMC14 | Eye_size_Parameter          | lens_max_density_L  | 1,48E-07 | NA |
| GMC14 | Eye_size_Parameter          | lens_max_density_R  | 4,70E-07 | NA |
| GMC14 | Eye_size_Parameter          | lens_mean_density_L | 7,56E-02 | NA |
| GMC14 | Eye_size_Parameter          | lens_mean_density_R | 4,61E-01 | NA |
| GMC14 | Eye_size_Parameter          | fundus_vessels_L    | 3,46E-05 | NA |
| GMC14 | Eye_size_Parameter          | fundus_vessels_R    | 2,03E-03 | NA |
| GMC14 | Eye_size_Parameter          | retinal_thickness_L | 8,52E-01 | NA |

|       |                                           |                     |          |                         |
|-------|-------------------------------------------|---------------------|----------|-------------------------|
| GMC14 | Eye_size_Parameter                        | retinal_thickness_R | 3,49E-01 | NA                      |
| GMC14 | Eye_size_Parameter                        | spatial_freq        | 3,88E-01 | NA                      |
| GMC15 | Hematology_Week_21_Parameter              | WBC                 | 1,44E-04 | NA                      |
| GMC15 | Hematology_Week_21_Parameter              | RBC                 | 1,48E-01 | NA                      |
| GMC15 | Hematology_Week_21_Parameter              | RDW                 | 3,92E-04 | NA                      |
| GMC15 | Hematology_Week_21_Parameter              | MCV                 | 7,31E-03 | NA                      |
| GMC15 | Hematology_Week_21_Parameter              | MCH                 | 6,08E-01 | NA                      |
| GMC15 | Hematology_Week_21_Parameter              | MCHC                | 4,99E-09 | NA                      |
| GMC15 | Hematology_Week_21_Parameter              | HGB                 | 1,31E-01 | NA                      |
| GMC15 | Hematology_Week_21_Parameter              | HCT                 | 8,03E-01 | NA                      |
| GMC15 | Hematology_Week_21_Parameter              | PLT                 | 2,55E-02 | NA                      |
| GMC15 | Hematology_Week_21_Parameter              | MPV                 | 7,94E-02 | NA                      |
| GMC15 | Hematology_Week_21_Parameter              | PDW                 | 1,80E-02 | NA                      |
| GMC15 | Hematology_Week_21_Parameter              | PLCR                | 2,31E-02 | NA                      |
| GMC15 | Hematology_Week_21_Parameter              | PCT                 | 6,17E-02 | NA                      |
| GMC16 | Clinical_chemistry_week_17_Parameter      | calcium_17          | NA       | Only data on 15/01/2013 |
| GMC16 | Clinical_chemistry_week_17_Parameter      | chloride_17         | NA       | Only data on 15/01/2013 |
| GMC16 | Clinical_chemistry_week_17_Parameter      | iron_17             | NA       | Only data on 15/01/2013 |
| GMC16 | Clinical_chemistry_week_17_Parameter      | lactate_17          | NA       | Only data on 15/01/2013 |
| GMC16 | Clinical_chemistry_week_17_Parameter      | phosphate_17        | NA       | Only data on 15/01/2013 |
| GMC16 | Clinical_chemistry_week_17_Parameter      | potassium_17        | NA       | Only data on 15/01/2013 |
| GMC16 | Clinical_chemistry_week_17_Parameter      | sodium_17           | NA       | Only data on 15/01/2013 |
| GMC16 | Clinical_chemistry_week_17_Parameter      | ALP_17              | NA       | Only data on 15/01/2013 |
| GMC16 | Clinical_chemistry_week_17_Parameter      | ALT_17              | NA       | Only data on 15/01/2013 |
| GMC16 | Clinical_chemistry_week_17_Parameter      | AST_17              | NA       | Only data on 15/01/2013 |
| GMC16 | Clinical_chemistry_week_17_Parameter      | LDH_17              | NA       | Only data on 15/01/2013 |
| GMC16 | Clinical_chemistry_week_17_Parameter      | amylase_17          | NA       | Only data on 15/01/2013 |
| GMC16 | Clinical_chemistry_week_17_Parameter      | GLU_17              | NA       | Only data on 15/01/2013 |
| GMC16 | Clinical_chemistry_week_17_Parameter      | creatinine_17       | NA       | Only data on 15/01/2013 |
| GMC16 | Clinical_chemistry_week_17_Parameter      | albumin_17          | NA       | Only data on 15/01/2013 |
| GMC16 | Clinical_chemistry_week_17_Parameter      | total_protein_17    | NA       | Only data on 15/01/2013 |
| GMC16 | Clinical_chemistry_week_17_Parameter      | urea_17             | NA       | Only data on 15/01/2013 |
| GMC16 | Clinical_chemistry_week_17_Parameter      | CHOL_17             | NA       | Only data on 15/01/2013 |
| GMC16 | Clinical_chemistry_week_17_Parameter      | TG_17               | NA       | Only data on 15/01/2013 |
| GMC16 | Clinical_chemistry_week_21_Parameter      | calcium_21          | 6,18E-05 | NA                      |
| GMC16 | Clinical_chemistry_week_21_Parameter      | chloride_21         | 3,68E-01 | NA                      |
| GMC16 | Clinical_chemistry_week_21_Parameter      | iron_21             | 7,49E-01 | NA                      |
| GMC16 | Clinical_chemistry_week_21_Parameter      | iron_binding_21     | 8,75E-01 | NA                      |
| GMC16 | Clinical_chemistry_week_21_Parameter      | lactate_21          | 5,13E-04 | NA                      |
| GMC16 | Clinical_chemistry_week_21_Parameter      | phosphate_21        | 8,75E-01 | NA                      |
| GMC16 | Clinical_chemistry_week_21_Parameter      | potassium_21        | 6,04E-01 | NA                      |
| GMC16 | Clinical_chemistry_week_21_Parameter      | sodium_21           | 7,79E-02 | NA                      |
| GMC16 | Clinical_chemistry_week_21_Parameter      | ALP_21              | 3,12E-02 | NA                      |
| GMC16 | Clinical_chemistry_week_21_Parameter      | ALT_21              | 1,55E-01 | NA                      |
| GMC16 | Clinical_chemistry_week_21_Parameter      | AST_21              | 1,92E-01 | NA                      |
| GMC16 | Clinical_chemistry_week_21_Parameter      | LDH_21              | 3,25E-01 | NA                      |
| GMC16 | Clinical_chemistry_week_21_Parameter      | amylase_21          | 6,53E-02 | NA                      |
| GMC16 | Clinical_chemistry_week_21_Parameter      | GLU_21              | 4,79E-01 | NA                      |
| GMC16 | Clinical_chemistry_week_21_Parameter      | albumin_21          | 5,56E-09 | NA                      |
| GMC16 | Clinical_chemistry_week_21_Parameter      | creatinine_21       | 1,32E-30 | NA                      |
| GMC16 | Clinical_chemistry_week_21_Parameter      | total_protein_21    | 2,12E-01 | NA                      |
| GMC16 | Clinical_chemistry_week_21_Parameter      | urea_21             | 1,53E-03 | NA                      |
| GMC16 | Clinical_chemistry_week_21_Parameter      | CHOL_21             | 8,41E-01 | NA                      |
| GMC16 | Clinical_chemistry_week_21_Parameter      | TG_21               | 9,92E-01 | NA                      |
| GMC17 | ABR_Parameter                             | click               | 5,59E-01 | NA                      |
| GMC17 | ABR_Parameter                             | pip_6               | 6,88E-01 | NA                      |
| GMC17 | ABR_Parameter                             | pip_12              | 5,27E-01 | NA                      |
| GMC17 | ABR_Parameter                             | pip_18              | 6,87E-01 | NA                      |
| GMC17 | ABR_Parameter                             | pip_24              | 4,96E-01 | NA                      |
| GMC17 | ABR_Parameter                             | pip_30              | 6,07E-02 | NA                      |
| GMC17 | ABR_Parameter                             | Extens_stimulus_lvs | NA       | Only data on 16/04/2013 |
| GMC18 | Dual_Energy_Xray_Absorptiometry_Parameter | body_length         | 3,91E-03 | NA                      |

|       |                                           |                       |          |                         |
|-------|-------------------------------------------|-----------------------|----------|-------------------------|
| GMC18 | Dual_Energy_Xray_Absorptiometry_Parameter | body_size             | 7,06E-03 | NA                      |
| GMC18 | Dual_Energy_Xray_Absorptiometry_Parameter | body_type             | 7,02E-03 | NA                      |
| GMC18 | Dual_Energy_Xray_Absorptiometry_Parameter | FATmass_Xhead         | 1,23E-01 | NA                      |
| GMC18 | Dual_Energy_Xray_Absorptiometry_Parameter | FATmass_wholebody     | 1,23E-01 | NA                      |
| GMC18 | Dual_Energy_Xray_Absorptiometry_Parameter | LEANmass_Xhead        | 5,27E-01 | NA                      |
| GMC18 | Dual_Energy_Xray_Absorptiometry_Parameter | LEANmass_wholebody    | 5,39E-01 | NA                      |
| GMC18 | Dual_Energy_Xray_Absorptiometry_Parameter | SOFTmass_Xhead        | 7,86E-02 | NA                      |
| GMC18 | Dual_Energy_Xray_Absorptiometry_Parameter | SOFTmass_wholebody    | 8,56E-02 | NA                      |
| GMC18 | Dual_Energy_Xray_Absorptiometry_Parameter | BMD_Xhead             | 6,15E-02 | NA                      |
| GMC18 | Dual_Energy_Xray_Absorptiometry_Parameter | BMD_wholebody         | 1,53E-01 | NA                      |
| GMC18 | Dual_Energy_Xray_Absorptiometry_Parameter | bone_area_Xhead       | 2,37E-02 | NA                      |
| GMC18 | Dual_Energy_Xray_Absorptiometry_Parameter | bone_area_wholebody   | 2,89E-02 | NA                      |
| GMC18 | Dual_Energy_Xray_Absorptiometry_Parameter | bone_mass_Xhead       | 1,87E-02 | NA                      |
| GMC18 | Dual_Energy_Xray_Absorptiometry_Parameter | bone_mass_wholebody   | 2,85E-02 | NA                      |
| GMC18 | Dual_Energy_Xray_Absorptiometry_Parameter | lumbar_num            | 5,23E-03 | NA                      |
| GMC19 | Lung_function_Parameter                   | residual_vol          | 1,13E-01 | NA                      |
| GMC19 | Lung_function_Parameter                   | expiratory_vol        | 5,31E-01 | NA                      |
| GMC19 | Lung_function_Parameter                   | forced_expiratory_vol | 5,08E-01 | NA                      |
| GMC19 | Lung_function_Parameter                   | tidal_vol             | 1,47E-13 | NA                      |
| GMC19 | Lung_function_Parameter                   | lung_capacity         | 3,18E-01 | NA                      |
| GMC19 | Lung_function_Parameter                   | vital_capacity        | 7,16E-01 | NA                      |
| GMC19 | Lung_function_Parameter                   | forced_capacity       | 4,99E-01 | NA                      |
| GMC19 | Lung_function_Parameter                   | inspiratory_capacity  | 5,93E-01 | NA                      |
| GMC19 | Lung_function_Parameter                   | residual_capacity     | 1,00E-01 | NA                      |
| GMC19 | Lung_function_Parameter                   | chord_compliance      | 6,90E-01 | NA                      |
| GMC19 | Lung_function_Parameter                   | dynamic_compliance    | 6,54E-01 | NA                      |
| GMC19 | Lung_function_Parameter                   | resistance            | 9,55E-01 | NA                      |
| GMC19 | Lung_function_Parameter                   | peak_flow             | 5,26E-01 | NA                      |
| GMC20 | All_immunoglobulins_week_17_21_Parameter  | IgM_17                | NA       | Only data on 15/01/2013 |
| GMC20 | All_immunoglobulins_week_17_21_Parameter  | IgM_21                | 2,27E-05 | NA                      |
| GMC20 | All_immunoglobulins_week_17_21_Parameter  | IgA_17                | NA       | Only data on 15/01/2013 |
| GMC20 | All_immunoglobulins_week_17_21_Parameter  | IgA_21                | 1,15E-13 | NA                      |
| GMC20 | All_immunoglobulins_week_17_21_Parameter  | IgG1_17               | NA       | Only data on 15/01/2013 |
| GMC20 | All_immunoglobulins_week_17_21_Parameter  | IgG1_21               | 1,14E-02 | NA                      |
| GMC20 | All_immunoglobulins_week_17_21_Parameter  | IgG2a_17              | NA       | Only data on 15/01/2013 |
| GMC20 | All_immunoglobulins_week_17_21_Parameter  | IgG2a_21              | 1,74E-01 | NA                      |
| GMC20 | All_immunoglobulins_week_17_21_Parameter  | IgG2b_17              | NA       | Only data on 15/01/2013 |
| GMC20 | All_immunoglobulins_week_17_21_Parameter  | IgG2b_21              | 3,73E-01 | NA                      |
| GMC20 | All_immunoglobulins_week_17_21_Parameter  | IgG3_17               | NA       | Only data on 15/01/2013 |
| GMC20 | All_immunoglobulins_week_17_21_Parameter  | IgG3_21               | 3,20E-06 | NA                      |
| GMC20 | All_immunoglobulins_week_17_21_Parameter  | IgE_17                | NA       | Only data on 15/01/2013 |
| GMC20 | All_immunoglobulins_week_17_21_Parameter  | IgE_21                | 7,45E-01 | NA                      |
| GMC20 | All_immunoglobulins_week_17_21_Parameter  | aDNA_17               | NA       | Only data on 15/01/2013 |
| GMC20 | All_immunoglobulins_week_17_21_Parameter  | aDNA_21               | 5,31E-02 | NA                      |
| GMC20 | All_immunoglobulins_week_17_21_Parameter  | RF_17                 | NA       | Only data on 15/01/2013 |
| GMC20 | All_immunoglobulins_week_17_21_Parameter  | RF_21                 | 3,81E-05 | NA                      |
| GMC21 | Organ_weights_at_section_Parameter        | tibia_length          | 2,38E-07 | NA                      |
| GMC21 | Organ_weights_at_section_Parameter        | heart_wt              | 6,54E-01 | NA                      |
| GMC21 | Organ_weights_at_section_Parameter        | liver_wt              | 8,87E-01 | NA                      |
| GMC21 | Organ_weights_at_section_Parameter        | spleen_wt             | 9,04E-01 | NA                      |
