# Supplementary material for: A comprehensive and comparative phenotypic analysis of the collaborative founder strains identifies new and known phenotypes
Source: PubMed Central journal article supplement (PMC7060152; doi:10.1007/s00335-020-09827-3), 2020-02-14
Supplement: 335_2020_9827_MOESM12_ESM.pdf [file 335_2020_9827_MOESM12_ESM.pdf]

**Table S7**

| Strain     | Parameter             | Strain_mean | 129vsStrain_t-test | 129vsStrain_N |
|------------|-----------------------|-------------|--------------------|---------------|
| A/J        | center_distance_total | 0,265625    | 0,016459119        | 37            |
| C57BL/6J   | center_distance_total | 24,8        | 4,12E-48           | 3             |
| CAST/EiJ   | center_distance_total | 25,45135135 | 2,54E-52           | 3             |
| NOD/ShiLtJ | center_distance_total | 33,61764706 | 2,28E-74           | 2             |
| NZO/HILtJ  | center_distance_total | 7,214705882 | 0,000701774        | 20            |
| PWK/PhJ    | center_distance_total | 16,06904762 | 5,76E-25           | 4             |
| WSB/EiJ    | center_distance_total | 24,84242424 | 1,02E-48           | 3             |
| A/J        | rears_total           | 1,21875     | 0,168021374        | 107           |
| C57BL/6J   | rears_total           | 135,09375   | 1,51E-39           | 3             |
| CAST/EiJ   | rears_total           | 125,2432432 | 6,90E-37           | 3             |
| NOD/ShiLtJ | rears_total           | 157,0588235 | 1,98E-50           | 3             |
| NZO/HILtJ  | rears_total           | 58,58823529 | 6,56E-09           | 7             |
| PWK/PhJ    | rears_total           | 135,6190476 | 2,22E-43           | 3             |
| WSB/EiJ    | rears_total           | 81,93939394 | 6,50E-17           | 4             |
| A/J        | center_rest           | 0           | 0,855848116        | 5334          |
| C57BL/6J   | center_rest           | 11,98125    | 1,16E-10           | 6             |
| CAST/EiJ   | center_rest           | 5,975675676 | 0,000864719        | 18            |
| NOD/ShiLtJ | center_rest           | 10,85882353 | 2,76E-09           | 6             |
| NZO/HILtJ  | center_rest           | 4,317647059 | 0,02024611         | 35            |
| PWK/PhJ    | center_rest           | 12,72380952 | 5,17E-13           | 5             |
| WSB/EiJ    | center_rest           | 5,381818182 | 0,003617141        | 22            |
| A/J        | iron_21               | 35,25090909 | 0,015573352        | 28            |
| C57BL/6J   | iron_21               | 21,06409091 | 7,36E-12           | 5             |
| CAST/EiJ   | iron_21               | 34,93173913 | 0,025919805        | 33            |
| NOD/ShiLtJ | iron_21               | 32,09809524 | 0,796445377        | 2282          |
| NZO/HILtJ  | iron_21               | 25,7152381  | 6,24E-05           | 11            |
| PWK/PhJ    | iron_21               | 28,45666667 | 0,026890017        | 32            |
| WSB/EiJ    | iron_21               | 37,50636364 | 9,33E-05           | 11            |
| A/J        | chloride_21           | 108,7590909 | 0,164881969        | 79            |
| C57BL/6J   | chloride_21           | 107,6       | 0,970314409        | 108726        |
| CAST/EiJ   | chloride_21           | 111,7304348 | 1,98E-06           | 8             |
| NOD/ShiLtJ | chloride_21           | 104,9952381 | 0,00332802         | 18            |
| NZO/HILtJ  | chloride_21           | 104,2818182 | 0,000168343        | 12            |
| PWK/PhJ    | chloride_21           | 110,3904762 | 0,001318481        | 15            |
| WSB/EiJ    | chloride_21           | 110,9727273 | 9,95E-05           | 11            |
| A/J        | calcium_21            | 2,431818182 | 0,005194933        | 21            |
| C57BL/6J   | calcium_21            | 2,393181818 | 4,47E-05           | 10            |
| CAST/EiJ   | calcium_21            | 2,341304348 | 7,73E-09           | 6             |
| NOD/ShiLtJ | calcium_21            | 2,429047619 | 0,004295165        | 20            |
| NZO/HILtJ  | calcium_21            | 2,499545455 | 0,654733081        | 782           |
| PWK/PhJ    | calcium_21            | 2,365714286 | 9,20E-07           | 7             |
| WSB/EiJ    | calcium_21            | 2,335       | 3,48E-09           | 6             |
