# Supplementary material for: A comprehensive and comparative phenotypic analysis of the collaborative founder strains identifies new and known phenotypes
Source: PubMed Central journal article supplement (PMC7060152; doi:10.1007/s00335-020-09827-3), 2020-02-14
Supplement: 335_2020_9827_MOESM13_ESM.pdf [file 335_2020_9827_MOESM13_ESM.pdf]

## Table S8

| <b>explanatory variable</b> | <b>Df</b> | <b>Sum Sq</b> | <b>Mean Sq</b> | <b>F value</b> | <b>Pr(&gt;F)</b> |
|-----------------------------|-----------|---------------|----------------|----------------|------------------|
| strain                      | 7         | 7,708792004   | 1,101256001    | 120,174953     | 1,41E-60         |
| sex                         | 1         | 1,683431809   | 1,683431809    | 183,7050954    | 2,08E-28         |
| bw                          | 1         | 0,492773357   | 0,492773357    | 53,77406794    | 1,04E-11         |
